# Supplementary material for: Taxonomic Re-Classification and Expansion of the Phylum Chloroflexota Based on over 5000 Genomes and Metagenome-Assembled Genomes
Source: MDPI journal article supplement (doi:10.3390/microorganisms11102612), 2023-10-23
Supplement: s1 [file s1]

## *Supplementary Material*

### **Taxonomic re-classification and expansion of the phylum *Chloroflexota* based on over 5,000 genomes and metagenome-assembled genomes**

**Sandra Wiegand<sup>1</sup>, Morgan Sobol<sup>1</sup>, Luca Kristina Schnepf-Pesch<sup>1</sup>, Geng Yan<sup>1</sup>, Sajid Iqbal<sup>1</sup>, John Vollmers<sup>1</sup>, Jochen A. Müller<sup>1</sup>, Anne-Kristin Kaster<sup>1\*</sup>**

<sup>1</sup>Institute for Biological Interfaces (IBG-5), Karlsruhe Institute of Technology, Eggenstein-Leopoldshafen, Germany

**\* Correspondence:**

anne-kristin.kaster@kit.edu

### **Supplementary Text**

#### **Determination of hotspots environments**

SRA metadata were accessed in via the data warehouse BigQuery on the Google Cloud platform to get a comprehensive overview of all metagenomic datasets that were found to harbour Chloroflexota or Dormibacterota by STAT (<https://genomebiology.biomedcentral.com/articles/10.1186/s13059-021-02490-0>). The following information was gathered from the nih-sra-datastore:

(I) sra\_tax\_analysis\_tool.tax\_analysis\_info.total\_spot\_count,  
sra\_tax\_analysis\_tool.tax\_analysis\_info.analyzed\_spot\_count,  
sra\_tax\_analysis\_tool.tax\_analysis\_info.unaligned\_only, sra\_tax\_analysis\_tool.tax\_analysis.acc,  
sra\_tax\_analysis\_tool.tax\_analysis.tax\_id,  
sra\_tax\_analysis\_tool.tax\_analysis.total\_count,  
sra\_tax\_analysis\_tool.tax\_analysis.self\_count, sra.metadata.acc, sra.metadata.organism in cases where sra\_tax\_analysis\_tool.tax\_analysis.rank was 'superkingdom',  
sra\_tax\_analysis\_tool.tax\_analysis.name was 'cellular organism', sra.metadata.assay\_type was 'WGS' and sra.metadata.librarysource was 'METAGENOMIC'.

(II) sra\_tax\_analysis\_tool.tax\_analysis.acc, sra\_tax\_analysis\_tool.tax\_analysis.rank,  
sra\_tax\_analysis\_tool.tax\_analysis.name, sra\_tax\_analysis\_tool.tax\_analysis.total\_count,  
sra\_tax\_analysis\_tool.tax\_analysis.self\_count in cases where sra.metadata.assay\_type was 'WGS', sra.metadata.librarysource was 'METAGENOMIC' and sra\_tax\_analysis\_tool.tax\_analysis.tax\_id was 200795 (Chloroflexi) or 2052312 (Candidatus Dormibacteraeota).

#### **Metagenome dataset selection and categorisation**

NCBI Entrez was searched for metagenomic datasets of potential interest with E-utilities. The following search terms were used:

- "aquatic metagenome"[Organism] OR "aquifer metagenome"[Organism] OR "freshwater metagenome"[Organism] OR "freshwater sediment metagenome"[Organism] OR

- "groundwater metagenome"[Organism] OR "lake water metagenome"[Organism] OR "pond metagenome"[Organism] OR "sediment metagenome"[Organism] OR "subsurface metagenome"[Organism]) AND WGS [All Fields]
- "activated sludge metagenome"[Organism] OR "anaerobic digester metagenome"[Organism] OR "biogas fermenter metagenome"[Organism] OR "bioreactor metagenome"[Organism] OR "bioreactor sludge metagenome"[Organism] OR "compost metagenome"[Organism] OR "decomposition metagenome"[Organism] OR "leaf litter metagenome"[Organism] OR "silage metagenome"[Organism] OR "sludge metagenome"[Organism] OR "wood decay metagenome"[Organism]) AND wgs[All Fields]
  - "coal metagenome"[Organism] OR coal\*[All Fields]) AND WGS [All Fields]
  - "coral metagenome"[Organism] OR "coral reef metagenome"[Organism] OR coral [All Fields] OR coral\*[All Fields]) AND WGS [All Fields]
  - earthworm [All Fields] AND WGS [All Fields]
  - "hot springs metagenome"[Organism] OR hot OR thermal OR geothermal OR hydrothermal) AND WGS [All Fields]
  - "hypersaline lake metagenome" [Organism] OR "saline spring metagenome" [Organism] OR "salt lake metagenome" [Organism] OR "salt marsh metagenome" [Organism] OR "salt mine metagenome" [Organism] OR "saltern metagenome" [Organism] OR salt [All Fields] OR saline [All Fields]) AND WGS [All Fields]
  - "lichen metagenome"[Organism] OR lichen [All Fields]) AND WGS [All Fields]
  - "microbial mat metagenome"[Organism] OR "stromatolite metagenome"[Organism]) AND wgs[All Fields]
  - marine metagenome"[Organism] OR "hydrothermal vent metagenome"[Organism] OR "marine sediment metagenome"[Organism] OR "coal metagenome"[Organism] OR "deep sea"[All Fields]) AND wgs [All Fields]
  - "moss metagenome"[Organism] OR moss [All Fields] OR moss\* [All Fields]) AND WGS [All Fields]
  - oral OR oral\* OR (dent\* calculus) OR (dent\* AND calculus) AND WGS [All Fields]
  - "rice paddy metagenome"[Organism] OR paddy [All Fields] OR paddies [All Fields]) AND WGS[All Fields]
  - "sponge metagenome"[Organism] OR sponge [All Fields] OR sponge\* [All Fields]) AND WGS [All Fields]
  - "soil metagenome"[Organism] OR "soil crust metagenome"[Organism]) AND WGS [All Fields])

Data reduction in the binning categories (*bioreactors*, *corals* + *sponges*, *high salt*, *hotsprings*, *lichens* + *mosses*, *marine*, *microbial mats*, *soil*, *water* and *oral*) were as follows.

- *Bioreactors*: Before the categories were defined, all metagenome datasets with less than <0.005% *Chloroflexota* (according to NCBI SRA) were removed. After the formation of the categories, only binning groups with at least >5% *Chloroflexota* in one comprised metagenome were kept. Additionally, those binning groups that were also part of a larger binning group (with >5% *Chloroflexota*) were kept.
- *Marine* and *water*: After the formation of the categories, only binning groups with at least >2% *Chloroflexota* in one comprised metagenome were kept. Additionally, those binning groups that were also part of a larger binning group (with >2% *Chloroflexota*) were kept.

- *Soil*: Before the categories were defined, all metagenome datasets with less than <0.001% *Chloroflexota* (according to NCBI SRA) were removed. After the formation of the categories, only binning groups with at least >0.75% *Chloroflexota* in one comprised metagenome were kept. Additionally, those binning groups that were also part of a larger binning group (with >0.75% *Chloroflexota*) were kept.
- No further data reduction was carried out for the 6 categories *corals + sponges*, *high salt*, *hotsprings*, *lichens + mosses*, *microbial mats* and *oral*.

## MAG clustering

The MAG clusters were classified depending on the genomes they comprised as described below:

- *nothing\_new\_here*: no novel MAG was part of this species cluster
- *mostly\_old*: <33% novel MAGs
- *old+new\_onlyMAGsSRA*: 33-66% novel MAGs, all derived from the binning approach
- *old+new\_onlyMAGsSample*: 33-66% novel MAGs, all derived from environmental samples
- *old+new\_onlyMAGsSRA+Sample*: 33-66% novel MAGs, derived from the binning approach as well as environmental samples
- *mostly\_new\_onlyMAGsSRA*: >66% novel MAGs, all derived from the binning approach
- *mostly\_new\_onlyMAGsSample*: >66% novel MAGs, all derived from environmental samples
- *mostly\_new\_onlyMAGsSRA+Sample*: >66% novel MAGs, derived from the binning approach as well as environmental samples
- *new\_onlyMAGsSRA*: only novel MAGs derived from the binning approach
- *new\_onlyMAGsSample*: only novel MAGs derived from environmental samples
- *new\_onlyMAGsSRA+Sample*: only novel MAGs, derived from the binning approach as well as environmental samples

Additionally, it was considered whether the best genome was publicly available or a novel MAG was found in this study.

## Information on sampling sites of this study

Samples for novel metagenomes were collected from the following sites.

Two sites at the Juan de Fuca ridge flank (47°45'16.8" N, 127°45'48" W, 2667 meter water depth, 1.5-3 meters below sea floor, 2 °C, oxic, mud, August 2004; same site, 50-52 mbsf, 1.5-3 mbsf, 12 °C, anoxic, sandy silt; same site, 90-92 mbsf, 20 °C, anoxic, silt; 47°45'16.6" N, 127°45'46.8" W, 121-123 mbsf, 40 °C, anoxic, silt, August 2004).

Two sites on São Miguel, Azores (Pico Vermelho, 37°88'40.7" N, 25°75'03.2" W, pH 6, 52 °C, 2020; Calderiras Furnas, 37°77'46" N, 25°30'59.8" W, pH 4, 51 °C, 2020).

Tatta Pani Hot Spring, Pakistan (33°61'21.5" N, 73°94'71.5" E, pH 8.4, 62 °C, 2021)  
Khewra Salt Mine, Pakistan (32°64'79.4" N, 73°00'83.9" E, pH 7.25, 24 °C, 2021)

Four sites in Guangdong, China (22°09'50" N, 112°37'00" E, pH 7.84, 35 °C, January 2021; 22°09'10" N, 112°36'40" E, pH 7.83, 55 °C, January 2021; 24°52'24" N, 114°07'10" E, pH 6.92, 60 °C, December 2020; 24°42'55" N, 113°44'20" E, pH 6.15, 65 °C, December 2020)

## Supplementary Figures

For Figures S1-S14, the colours of the dots, bars and regression lines represent the class of the genome. Genome length is given in megabase pairs. In total, 3509 species-representing genomes were analysed.

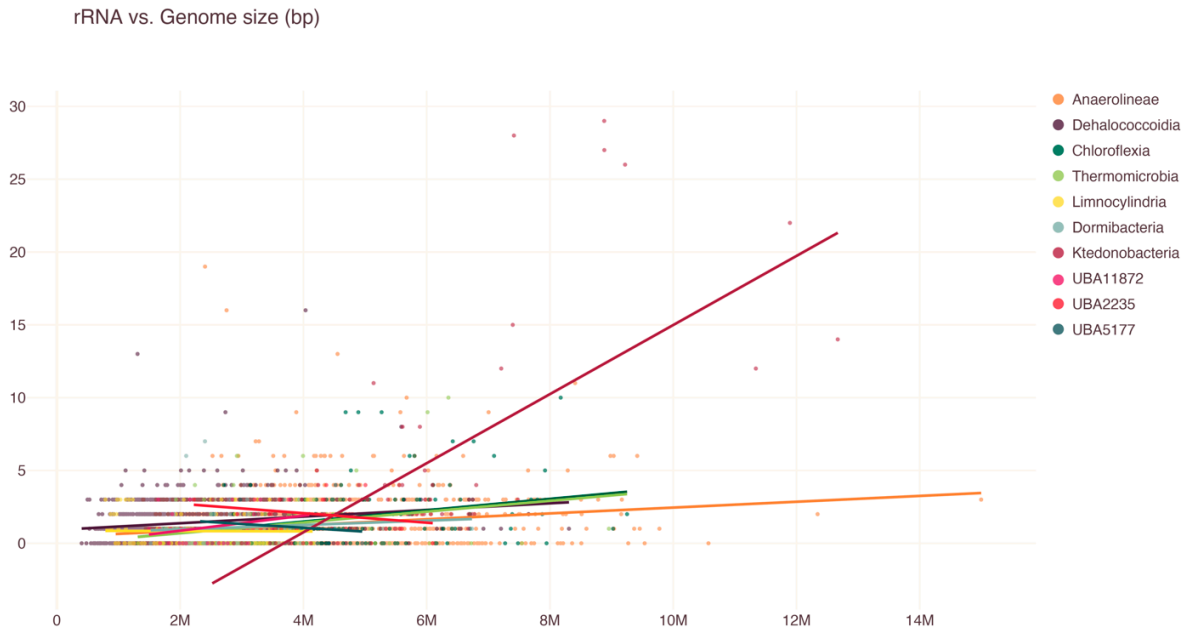

**Supplemental Figure S1. Number of rRNA genes over genome length in different *Chloroflexota* classes.**

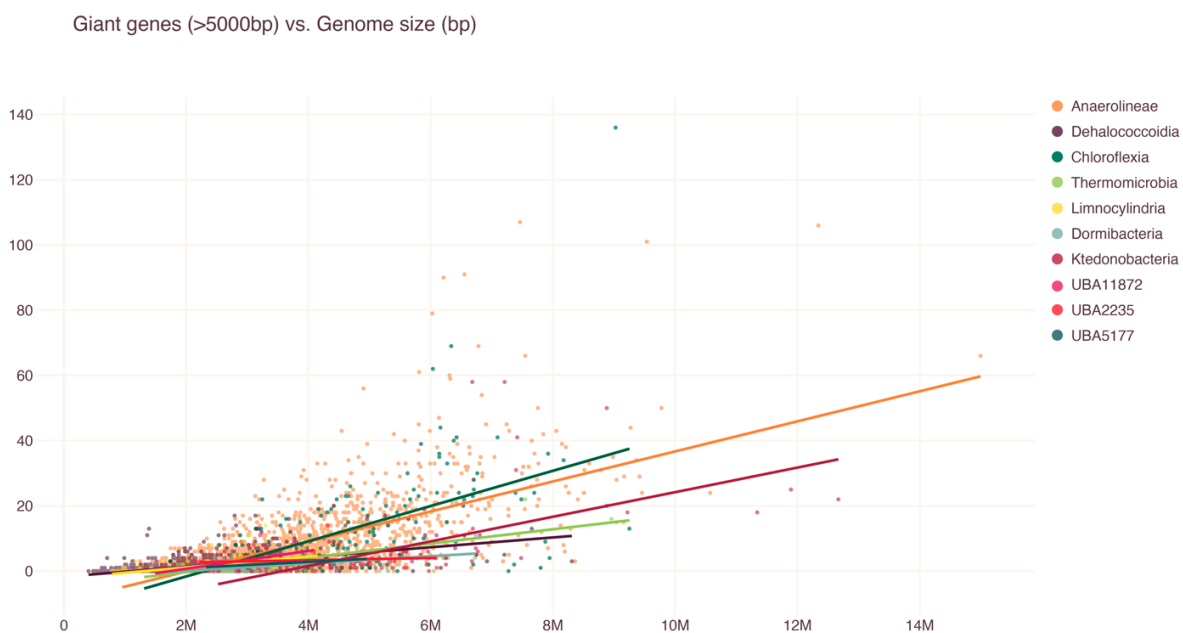

**Supplemental Figure S2. Number of giant genes over genome length in different *Chloroflexota* classes.**

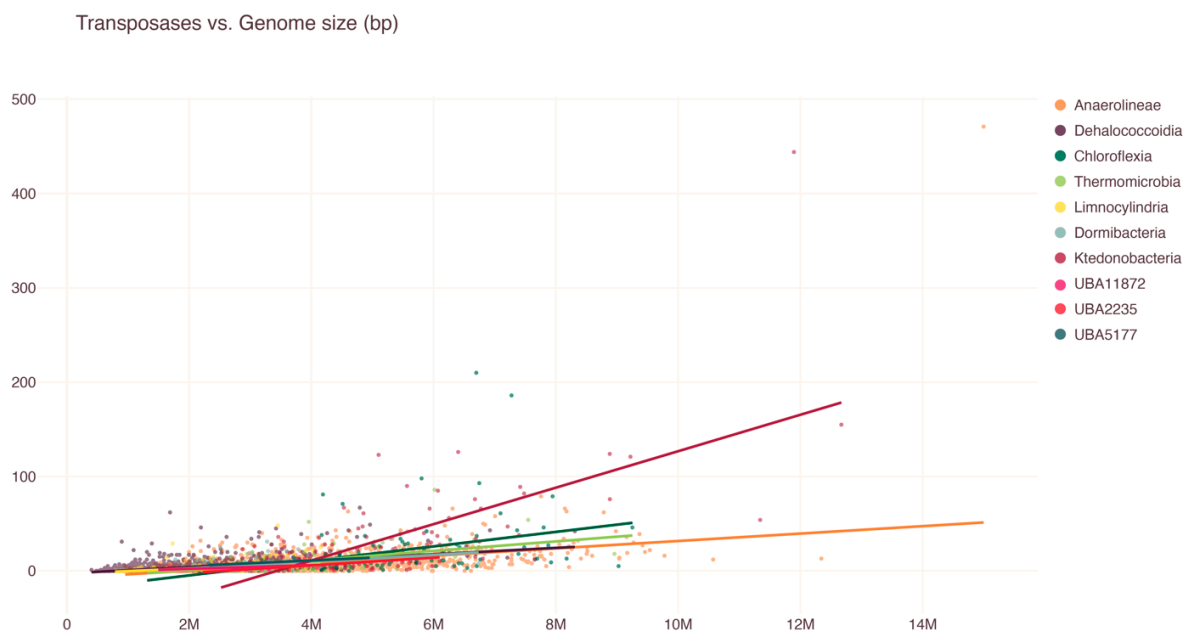

**Supplemental Figure S3. Number of transposases over genome length in different *Chloroflexota* classes.**

C vs. Genome size (bp)

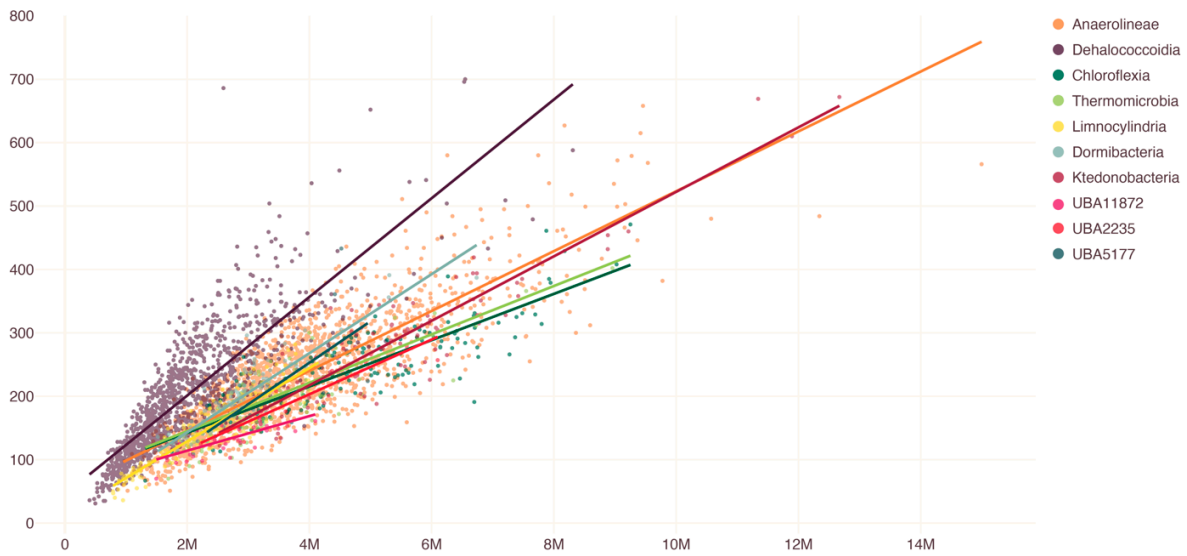

**Supplemental Figure S4. COG category C (energy production and conversion) hits per genome over genome length in different *Chloroflexota* classes.**

E vs. Genome size (bp)

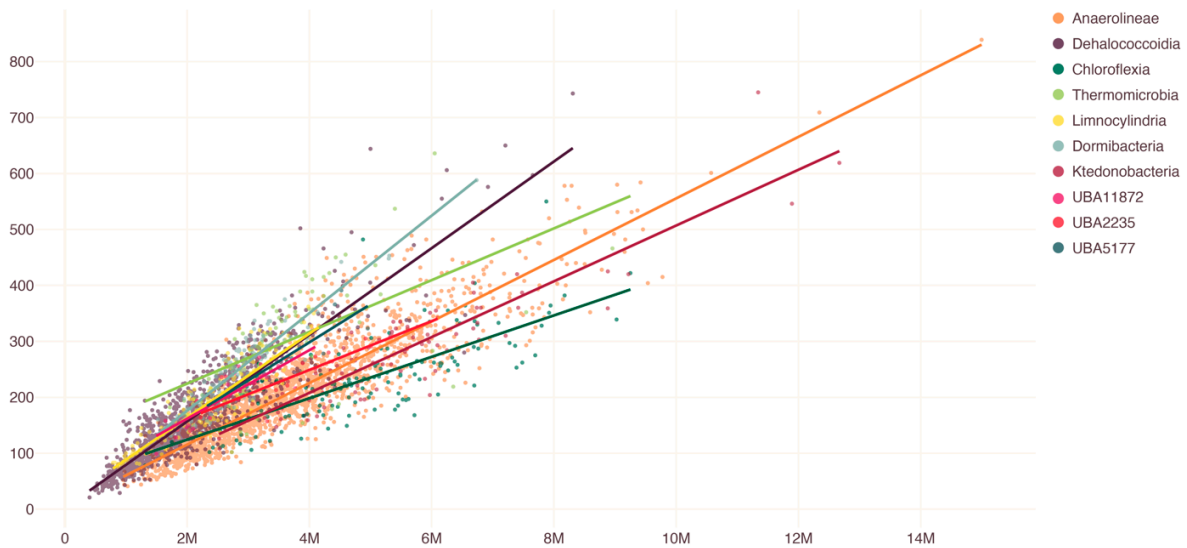

**Supplemental Figure S5. COG category E (amino acid transport and metabolism) hits per genome over genome length in different *Chloroflexota* classes.**

G vs. Genome size (bp)

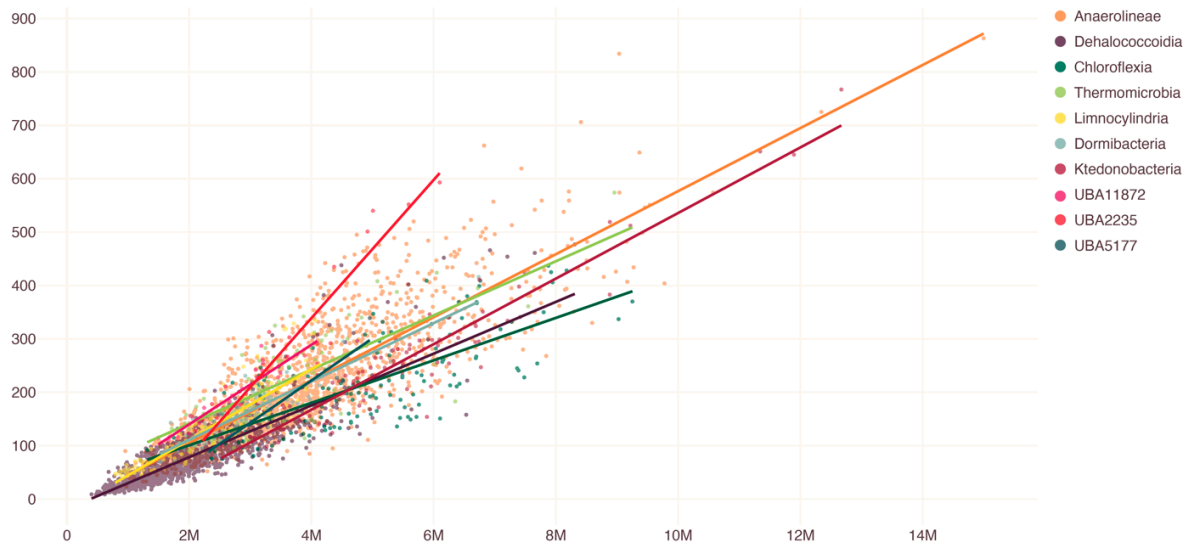

**Supplemental Figure S6. COG category G (carbohydrate transport and metabolism) hits per genome over genome length in different *Chloroflexota* classes.**

I vs. Genome size (bp)

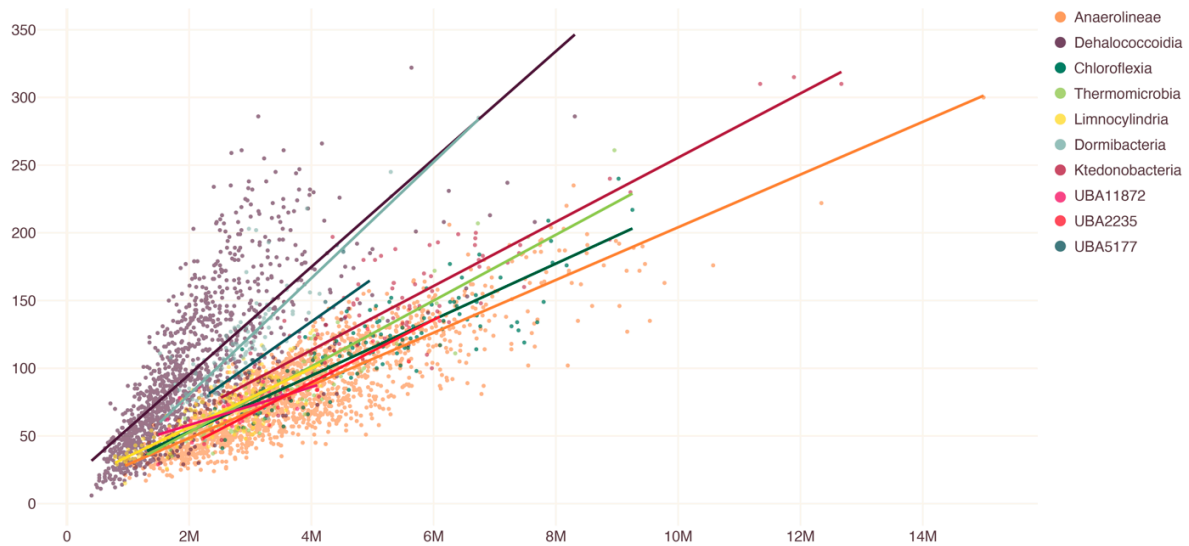

**Supplemental Figure S7. COG category I (lipid transport and metabolism) hits per genome over genome length in different *Chloroflexota* classes.**

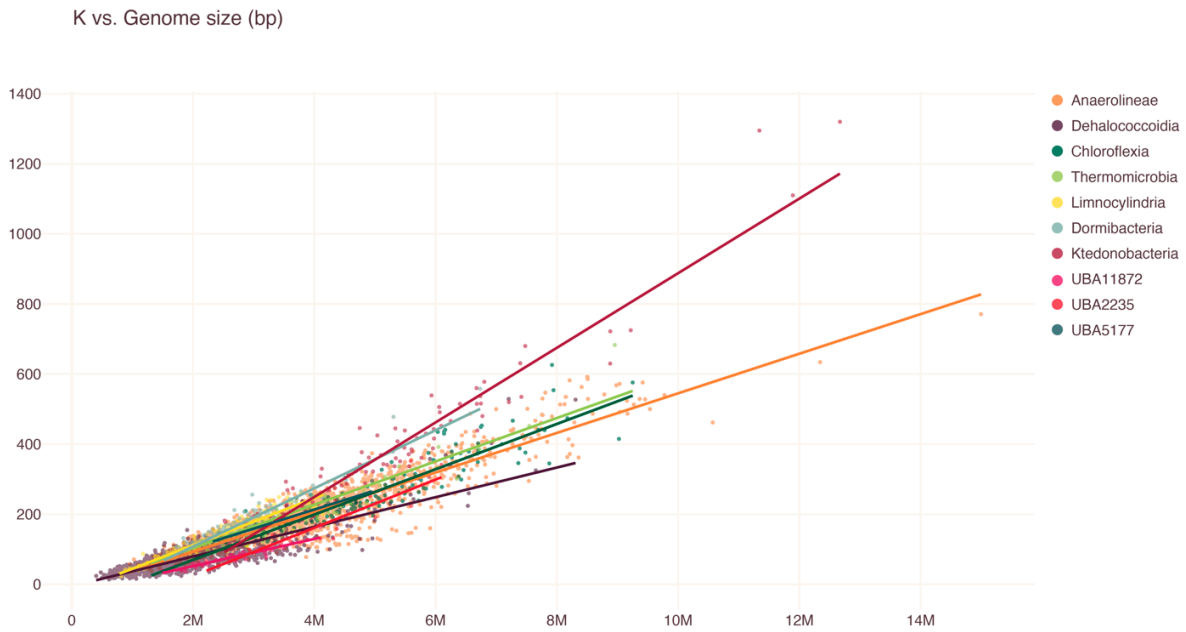

**Supplemental Figure S8. COG category K (transcription) hits per genome over genome length in different *Chloroflexota* classes.**

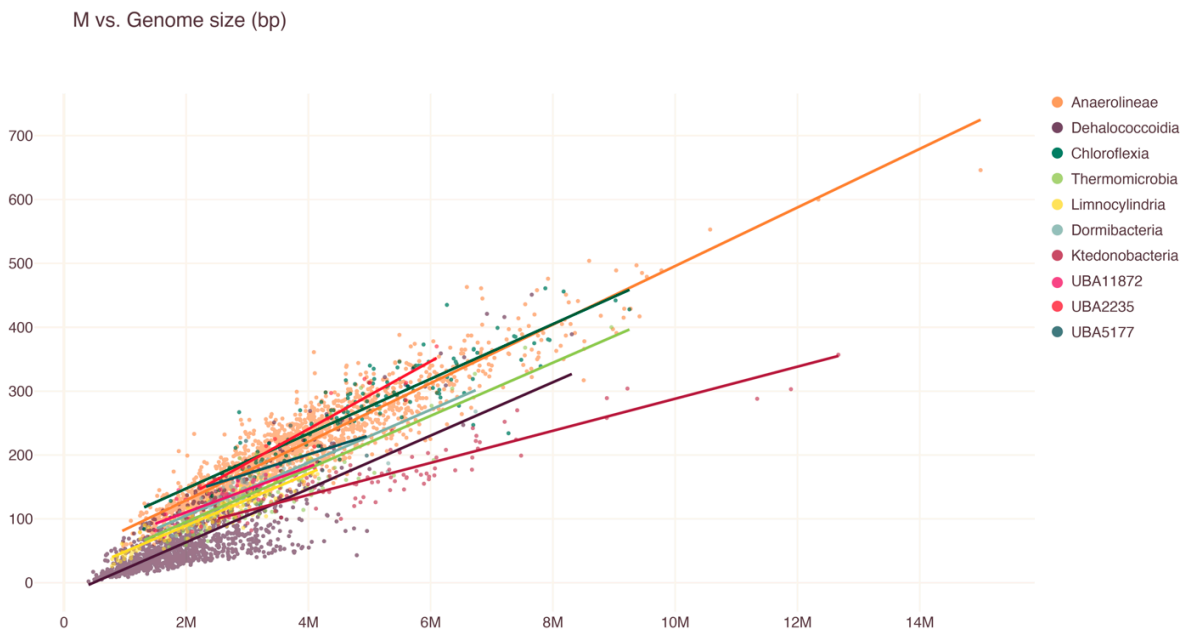

**Supplemental Figure S9. COG category M (cell wall/membrane/envelope biogenesis) hits per genome over genome length in different *Chloroflexota* classes.**



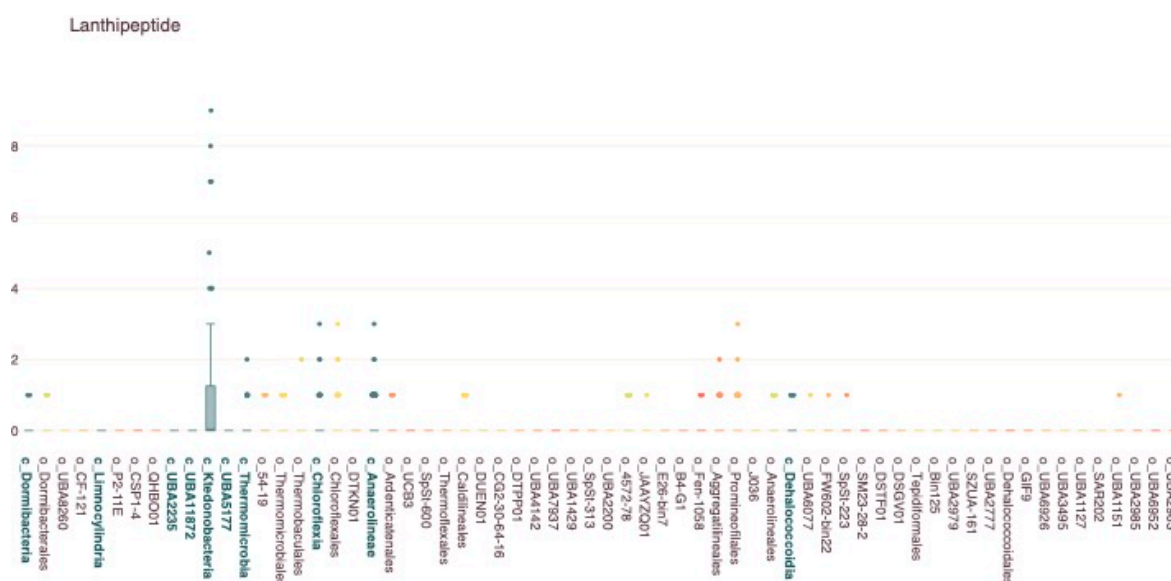

**Supplemental Figure S10. Average number of lanthipeptide biosynthetic gene clusters in *Chloroflexota* classes and orders.** Greyish blue boxes represent classes and yellow to red boxes represent underlying orders. Orders were included when there were at least two orders with 5 or more genomes in the encompassing class.

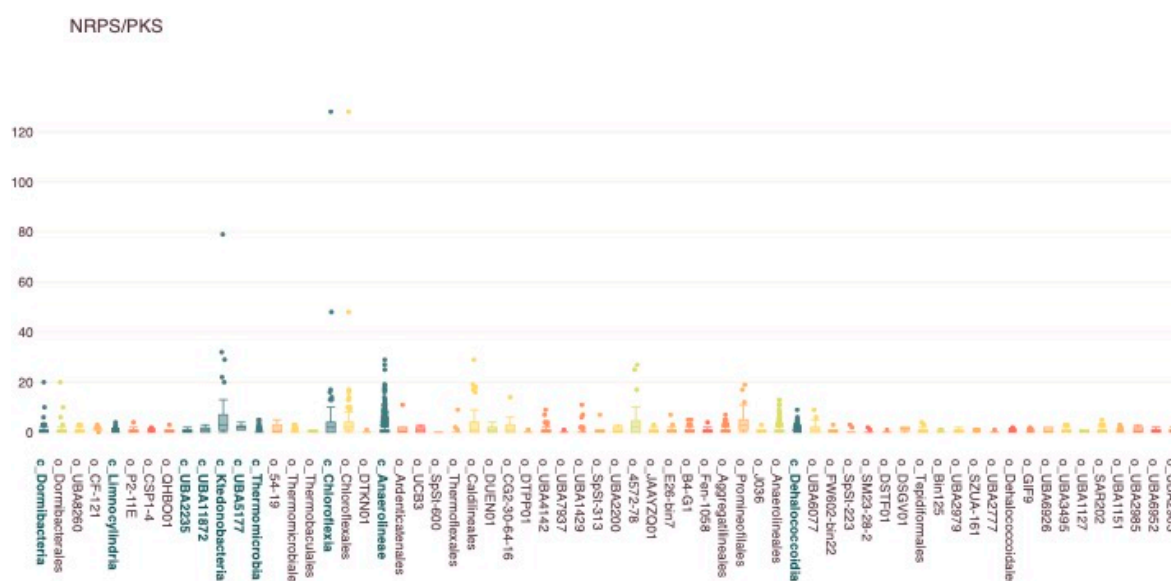

**Supplemental Figure S11. Average number of nonribosomal peptide synthetase/polyketide synthetase (NRPS/PKS) biosynthetic gene clusters in *Chloroflexota* classes and orders.** Greyish blue boxes represent classes and yellow to red boxes represent underlying orders. Orders were included when there were at least two orders with 5 or more genomes in the encompassing class.

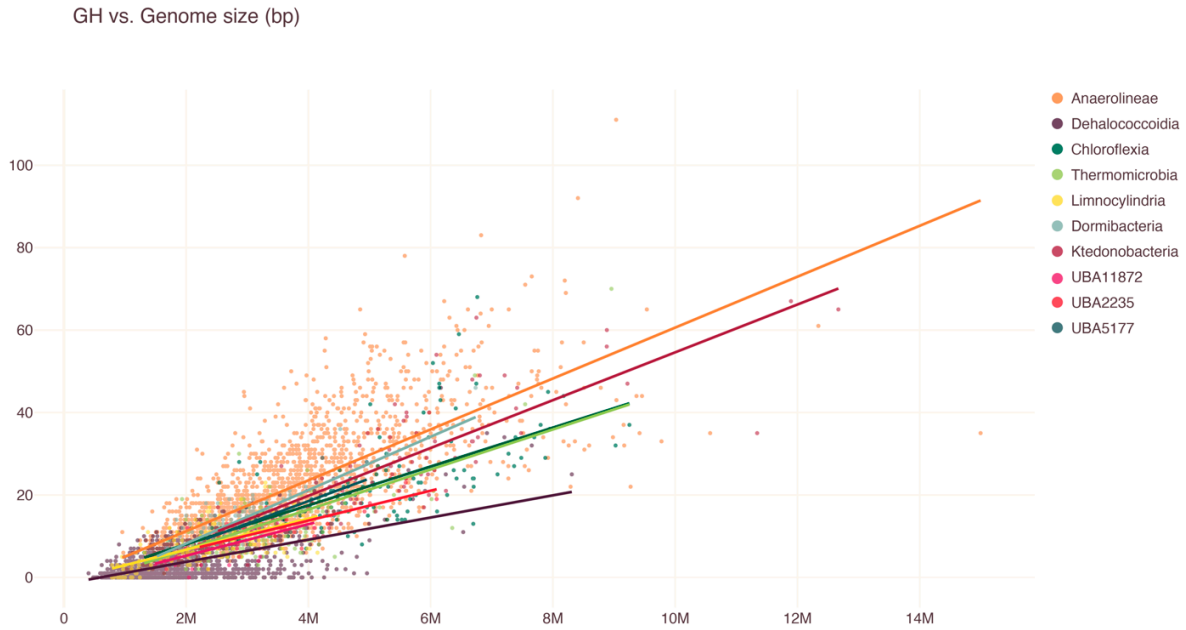

**Supplemental Figure S12. Glycoside hydrolase genes per genome over genome length in different *Chloroflexota* classes.**

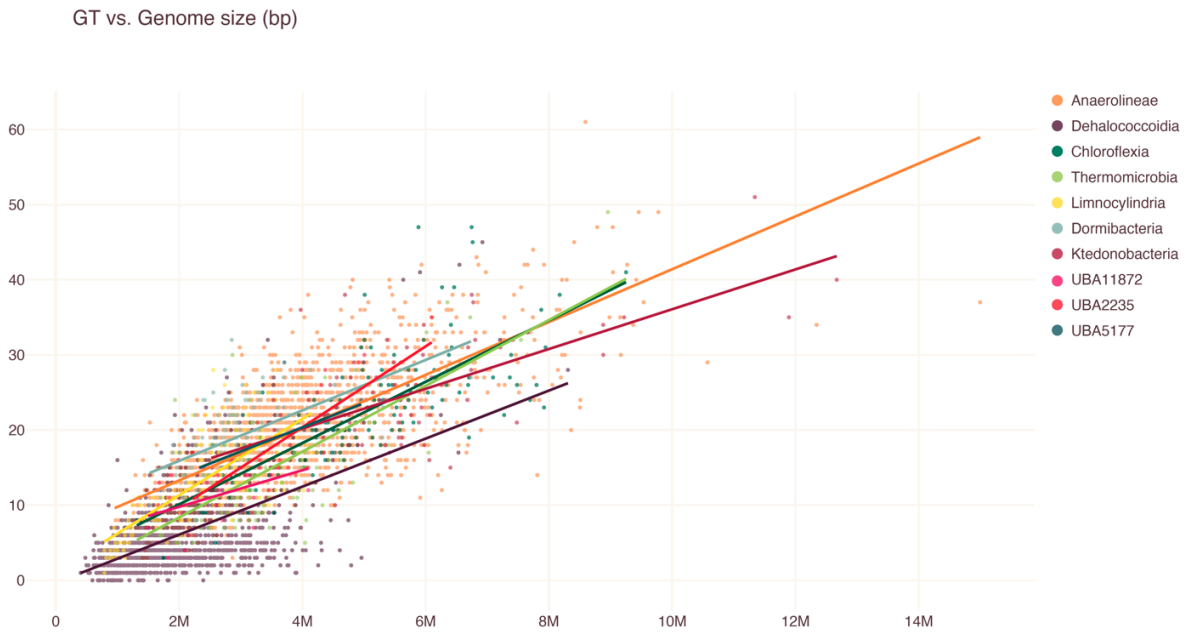

**Supplemental Figure S13. Glycosyltransferase genes per genome over genome length in different *Chloroflexota* classes.**

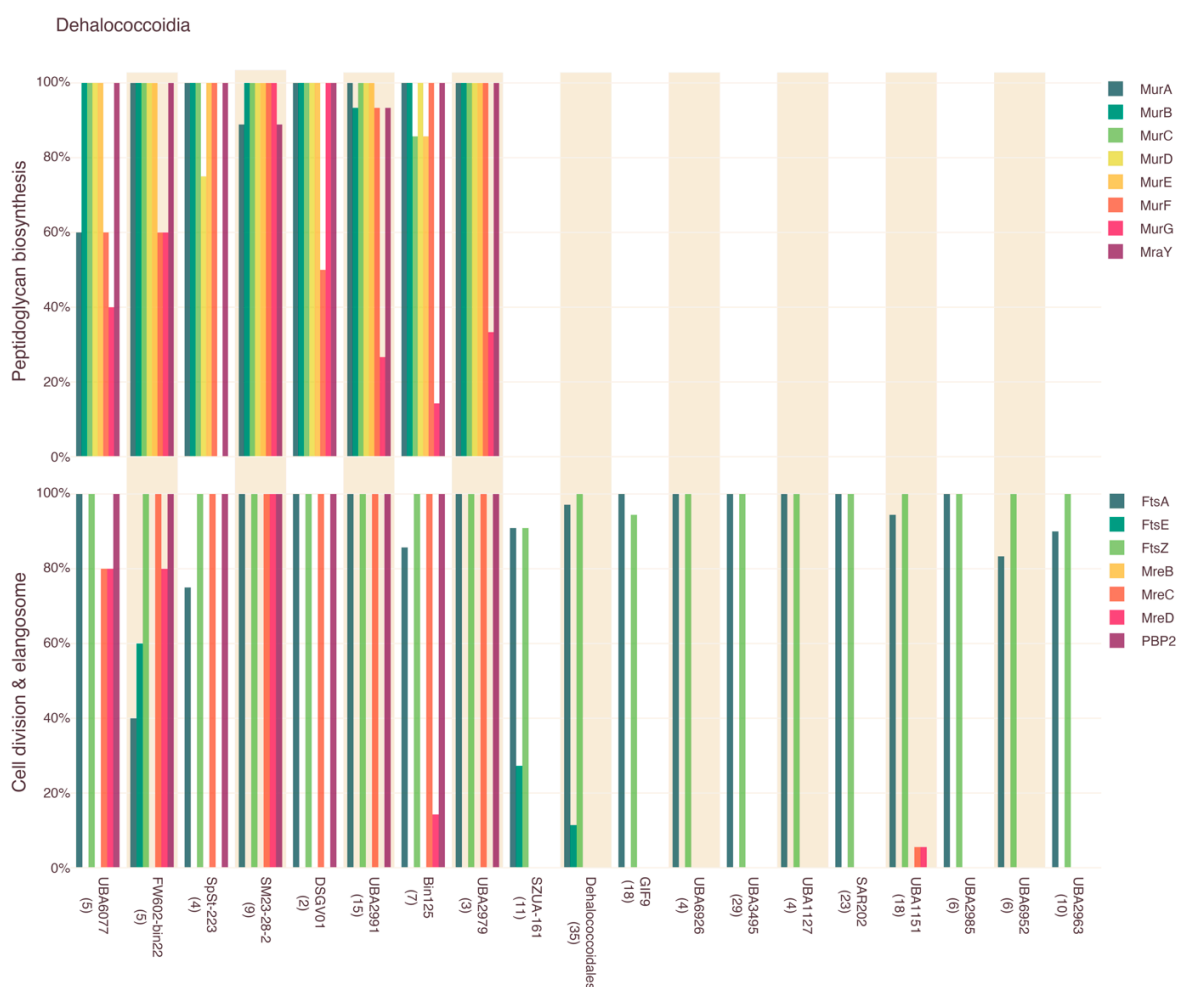

**Supplemental Figure S14. Average occurrence of genes coding for enzymes involved in peptidoglycan biosynthesis (upper panel) or cell division and elongosome formation (lower panel) in *Dehalococcoidia* orders.** Numbers indicate the number of genomes analysed for each order. The results for FtsL, FtsN, ZipA and FtsW are not shown as they either had hits in less than 1% percent of all genomes or had multiple inconclusive hits in most genomes.

## 1.1 Supplementary Tables

Supplementary Tables S1-S7 are uploaded as individual Excel files
