# Supplementary material for: Taxonomic Re-Classification and Expansion of the Phylum Chloroflexota Based on over 5000 Genomes and Metagenome-Assembled Genomes
Source: Microorganisms. 2023 Oct 23;11(10):2612. doi: 10.3390/microorganisms11102612 (PMC10608941; doi:10.3390/microorganisms11102612)
Supplement: Supplementary file 1 [file microorganisms-11-02612-s001.zip]

Archive with 8 entries (8 files):
- Supplementary_Text_and_Figures.pdf
- Table_S1_Public_genomes.xlsx
- Table_S2_Binning_groups.xlsx
- Table_S3_Markergenes.xlsx
- Table_S4_Species_clusters.xlsx
- Table_S5_Overview_MAGs.xlsx
- Table_S6_Initial_ phylogeny_MAGs.xlsx
- Table_S7_Quality_after_MDMcleaner.xlsx
