# Supplementary material for: Taxonomic Re-Classification and Expansion of the Phylum Chloroflexota Based on over 5000 Genomes and Metagenome-Assembled Genomes
Source: Microorganisms. 2023 Oct 23;11(10):2612. doi: 10.3390/microorganisms11102612 (PMC10608941; doi:10.3390/microorganisms11102612)
Supplement: Supplementary file 1 [file microorganisms-11-02612-s001.zip › Table_S1_Public_genomes.xlsx]

## Sheet: public genomes
genome	quality standard	source	GTDB-Tk taxonomy	number of contigs	length (bp)	MAGpurify - % cont bp	CheckM - contamination	Checkm - strain heterogeneity	Checkm - adjusted contamination	CheckM - completeness	MDMcleaner - completeness	Weighted completeness
3300025812_11	>90% completeness AND <5% contamination	Nayfach et al.	d__Bacteria;p__Chloroflexota_A;c__Ellin6529;o__CSP1-4;f__CSP1-4;g__Fen-1039;s__	77	3214710	0	0	0	0	87.93	100	90.344
3300009083_71	>90% completeness AND <5% contamination	Nayfach et al.	d__Bacteria;p__Chloroflexota_A;c__Ellin6529;o__CSP1-4;f__CSP1-4;g__Palsa-1032;s__	359	4020740	0	0	0	0	94.83	100	95.864
3300012004_1	>90% completeness AND <5% contamination	Nayfach et al.	d__Bacteria;p__Chloroflexota_A;c__Ellin6529;o__CSP1-4;f__CSP1-4;g__UBA5189;s__UBA5189 sp002413045	16	3118960	0	1.72	0	1.72	96.55	95	96.24
3300013126_122	>90% completeness AND <5% contamination	Nayfach et al.	d__Bacteria;p__Chloroflexota_A;c__Ellin6529;o__CSP1-4;f__UBA10416;g__UBA10416;s__	59	985750	0	0	0	0	89.66	100	91.728
3300017788_114	>90% completeness AND <5% contamination	Nayfach et al.	d__Bacteria;p__Chloroflexota_A;c__Ellin6529;o__CSP1-4;f__UBA10416;g__UBA10416;s__	79	910640	0	0	0	0	89.66	100	91.728
3300021424_57	>90% completeness AND <5% contamination	Nayfach et al.	d__Bacteria;p__Chloroflexota_A;c__Ellin6529;o__CSP1-4;f__UBA10416;g__UBA10416;s__	33	1149220	0	0	0	0	91.07	100	92.856
3300015199_8	>90% completeness AND <5% contamination	Nayfach et al.	d__Bacteria;p__Chloroflexota_A;c__Ellin6529;o__P2-11E;f__P2-11E;g__UBA4735;s__	176	2543380	0	4.31	66.67	1.43652	94.83	100	95.864
3300000866_7	>90% completeness AND <5% contamination	Nayfach et al.	d__Bacteria;p__Chloroflexota;c__Anaerolineae;o__;f__;g__;s__	94	2091710	0	0	0	0	99.84	100	99.872
3300005298_10	>90% completeness AND <5% contamination	Nayfach et al.	d__Bacteria;p__Chloroflexota;c__Anaerolineae;o__;f__;g__;s__	204	2105360	0	0.86	100	0	94.67	85	92.736
3300017406_11	>90% completeness AND <5% contamination	Nayfach et al.	d__Bacteria;p__Chloroflexota;c__Anaerolineae;o__;f__;g__;s__	198	1784250	0	0	0	0	93.1	90	92.48
3300017419_9	>90% completeness AND <5% contamination	Nayfach et al.	d__Bacteria;p__Chloroflexota;c__Anaerolineae;o__;f__;g__;s__	163	3427090	0	0	0	0	100	100	100
3300017452_7	>90% completeness AND <5% contamination	Nayfach et al.	d__Bacteria;p__Chloroflexota;c__Anaerolineae;o__;f__;g__;s__	224	4115830	0	1.72	0	1.72	95.92	95	95.736
3300017470_2	>90% completeness AND <5% contamination	Nayfach et al.	d__Bacteria;p__Chloroflexota;c__Anaerolineae;o__;f__;g__;s__	258	4446770	0	1.72	0	1.72	100	100	100
3300020139_23	>90% completeness AND <5% contamination	Nayfach et al.	d__Bacteria;p__Chloroflexota;c__Anaerolineae;o__;f__;g__;s__	227	2388850	0	0	0	0	92.95	80	90.36
3300025546_17	>90% completeness AND <5% contamination	Nayfach et al.	d__Bacteria;p__Chloroflexota;c__Anaerolineae;o__;f__;g__;s__	156	2223930	0	0	0	0	100	100	100
3300025597_6	>90% completeness AND <5% contamination	Nayfach et al.	d__Bacteria;p__Chloroflexota;c__Anaerolineae;o__;f__;g__;s__	168	3922320	0	0	0	0	98.28	95	97.624
3300025613_5	>90% completeness AND <5% contamination	Nayfach et al.	d__Bacteria;p__Chloroflexota;c__Anaerolineae;o__;f__;g__;s__	264	3576830	0	1.72	0	1.72	97.65	95	97.12
3300025649_3	>90% completeness AND <5% contamination	Nayfach et al.	d__Bacteria;p__Chloroflexota;c__Anaerolineae;o__;f__;g__;s__	174	5594960	0	4.7	9.09	4.27277	98.28	100	98.624
3300025708_15	>90% completeness AND <5% contamination	Nayfach et al.	d__Bacteria;p__Chloroflexota;c__Anaerolineae;o__;f__;g__;s__	118	3857490	0	0	0	0	98.28	95	97.624
3300025720_1	>90% completeness AND <5% contamination	Nayfach et al.	d__Bacteria;p__Chloroflexota;c__Anaerolineae;o__;f__;g__;s__	121	6306700	0	3.45	0	3.45	98.28	95	97.624
3300025720_6	>90% completeness AND <5% contamination	Nayfach et al.	d__Bacteria;p__Chloroflexota;c__Anaerolineae;o__;f__;g__;s__	90	4542680	0	1.72	0	1.72	94.83	95	94.864
3300025724_5	>90% completeness AND <5% contamination	Nayfach et al.	d__Bacteria;p__Chloroflexota;c__Anaerolineae;o__;f__;g__;s__	89	4274440	0	0	0	0	94.83	95	94.864
3300025861_10	>90% completeness AND <5% contamination	Nayfach et al.	d__Bacteria;p__Chloroflexota;c__Anaerolineae;o__;f__;g__;s__	42	4536780	0	1.72	0	1.72	94.83	100	95.864
3300025861_8	>90% completeness AND <5% contamination	Nayfach et al.	d__Bacteria;p__Chloroflexota;c__Anaerolineae;o__;f__;g__;s__	308	4746950	0	1.72	100	0	89.5	100	91.6
3300026293_8	>90% completeness AND <5% contamination	Nayfach et al.	d__Bacteria;p__Chloroflexota;c__Anaerolineae;o__;f__;g__;s__	171	3603220	0	0	0	0	93.1	100	94.48
3300027515_19	>90% completeness AND <5% contamination	Nayfach et al.	d__Bacteria;p__Chloroflexota;c__Anaerolineae;o__;f__;g__;s__	137	3182070	0	3.45	100	0	96.55	100	97.24
3300027515_22	>90% completeness AND <5% contamination	Nayfach et al.	d__Bacteria;p__Chloroflexota;c__Anaerolineae;o__;f__;g__;s__	341	3016800	0	1.72	0	1.72	94.83	90	93.864
3300027863_101	>90% completeness AND <5% contamination	Nayfach et al.	d__Bacteria;p__Chloroflexota;c__Anaerolineae;o__;f__;g__;s__	117	2321820	0	0	0	0	98.28	100	98.624
3300029314_4	>90% completeness AND <5% contamination	Nayfach et al.	d__Bacteria;p__Chloroflexota;c__Anaerolineae;o__;f__;g__;s__	163	4979340	1.27768	0	0	0	87.77	100	90.216
GCA_018812555.1_ASM1881255v1_genomic	>90% completeness AND <5% contamination	Genbank	d__Bacteria;p__Chloroflexota;c__Anaerolineae;o__;f__;g__;s__	572	6859460	0	3.45	0	3.45	98.28	95	97.624
3300017444_8	>90% completeness AND <5% contamination	Nayfach et al.	d__Bacteria;p__Chloroflexota;c__Anaerolineae;o__4572-78;f__;g__;s__	126	8513590	0	0	0	0	98.28	95	97.624
3300026007_2	>90% completeness AND <5% contamination	Nayfach et al.	d__Bacteria;p__Chloroflexota;c__Anaerolineae;o__4572-78;f__;g__;s__	723	8288520	0	1.72	100	0	93.1	95	93.48
133454	>90% completeness AND <5% contamination	PATRIC	d__Bacteria;p__Chloroflexota;c__Anaerolineae;o__4572-78;f__J111;g__DSQQ01;s__	689	5829110	0	0	0	0	100	80	96
GCA_015075185.1_ASM1507518v1_genomic	>90% completeness AND <5% contamination	Genbank	d__Bacteria;p__Chloroflexota;c__Anaerolineae;o__4572-78;f__J111;g__DSQQ01;s__	10	9416220	0	0	0	0	98.28	100	98.624
GCA_015075405.1_ASM1507540v1_genomic	>90% completeness AND <5% contamination	Genbank	d__Bacteria;p__Chloroflexota;c__Anaerolineae;o__4572-78;f__J111;g__DSQQ01;s__	7	8981380	0	0	0	0	100	100	100
GCA_016860845.1_ASM1686084v1_genomic	>90% completeness AND <5% contamination	Genbank	d__Bacteria;p__Chloroflexota;c__Anaerolineae;o__4572-78;f__J111;g__DSQQ01;s__	84	9270210	1.09846	0	0	0	88.71	100	90.968
GCA_016926805.1_ASM1692680v1_genomic	>90% completeness AND <5% contamination	Genbank	d__Bacteria;p__Chloroflexota;c__Anaerolineae;o__4572-78;f__J111;g__DSQQ01;s__	222	5335390	0	1.72	0	1.72	94.83	75	90.864
GCA_016931895.1_ASM1693189v1_genomic	>90% completeness AND <5% contamination	Genbank	d__Bacteria;p__Chloroflexota;c__Anaerolineae;o__4572-78;f__J111;g__DSQQ01;s__	320	6061830	0	1.72	0	1.72	98.28	90	96.624
GCA_012032575.1_ASM1203257v1_genomic	>90% completeness AND <5% contamination	Genbank	d__Bacteria;p__Chloroflexota;c__Anaerolineae;o__4572-78;f__J111;g__DSQQ01;s__DSQQ01 sp012032575	876	7919360	1.17219	0.16	0	0.16	96.39	95	96.112
2.07312e+06	>90% completeness AND <5% contamination	PATRIC	d__Bacteria;p__Chloroflexota;c__Anaerolineae;o__4572-78;f__J111;g__J095;s__	53	8782340	0.052264	0	0	0	100	95	99
3300017419_10	>90% completeness AND <5% contamination	Nayfach et al.	d__Bacteria;p__Chloroflexota;c__Anaerolineae;o__4572-78;f__NAK82;g__NAK82;s__	201	3260890	0	1.72	100	0	93.1	85	91.48
GCA_003130875.1_ASM313087v1_genomic	>90% completeness AND <5% contamination	Genbank	d__Bacteria;p__Chloroflexota;c__Anaerolineae;o__4572-78;f__NAK82;g__NAK82;s__NAK82 sp003130875	195	3489150	0	0	0	0	96.55	95	96.24
GCA_011362805.1_ASM1136280v1_genomic	>90% completeness AND <5% contamination	Genbank	d__Bacteria;p__Chloroflexota;c__Anaerolineae;o__4572-78;f__NAK82;g__NAK82;s__NAK82 sp011362805	270	3143960	0	0	0	0	93.1	90	92.48
3300028398_23	>90% completeness AND <5% contamination	Nayfach et al.	d__Bacteria;p__Chloroflexota;c__Anaerolineae;o__Anaerolineales;f__;g__;s__	230	2253590	2.31009	0	0	0	94.67	95	94.736
3300022177_37	>90% completeness AND <5% contamination	Nayfach et al.	d__Bacteria;p__Chloroflexota;c__Anaerolineae;o__Anaerolineales;f__Anaerolineaceae;g__49-20;s__	40	2195620	0	0	0	0	98.28	95	97.624
167964	>90% completeness AND <5% contamination	PATRIC	d__Bacteria;p__Chloroflexota;c__Anaerolineae;o__Anaerolineales;f__Anaerolineaceae;g__Anaerolinea;s__	13	3293610	0	0	0	0	100	95	99
GCA_001050195.2_ASM105019v2_genomic	>90% completeness AND <5% contamination	Genbank	d__Bacteria;p__Chloroflexota;c__Anaerolineae;o__Anaerolineales;f__Anaerolineaceae;g__Anaerolinea;s__Anaerolinea thermolimosa	6	4.17386e+06	0	0.86	100	0	96.55	100	97.24
GCA_000199675.1_ASM19967v1_genomic	>90% completeness AND <5% contamination	Genbank	d__Bacteria;p__Chloroflexota;c__Anaerolineae;o__Anaerolineales;f__Anaerolineaceae;g__Anaerolinea;s__Anaerolinea thermophila	1	3532380	0	0	0	0	100	100	100
GCA_001050215.2_ASM105021v2_genomic	>90% completeness AND <5% contamination	Genbank	d__Bacteria;p__Chloroflexota;c__Anaerolineae;o__Anaerolineales;f__Anaerolineaceae;g__Bellilinea;s__Bellilinea caldifistulae	1	3698320	0	0	0	0	96.55	100	97.24
GCA_003453955.1_ASM345395v1_genomic	>90% completeness AND <5% contamination	Genbank	d__Bacteria;p__Chloroflexota;c__Anaerolineae;o__Anaerolineales;f__Anaerolineaceae;g__Bellilinea;s__Bellilinea sp001796355	113	3108680	2.01983	0	0	0	96.55	95	96.24
167964	>90% completeness AND <5% contamination	PATRIC	d__Bacteria;p__Chloroflexota;c__Anaerolineae;o__Anaerolineales;f__Anaerolineaceae;g__Bellilinea;s__Bellilinea sp003448875	67	4293530	1.29916	0	0	0	94.83	95	94.864
GCA_004347695.1_ASM434769v1_genomic	>90% completeness AND <5% contamination	Genbank	d__Bacteria;p__Chloroflexota;c__Anaerolineae;o__Anaerolineales;f__Anaerolineaceae;g__Bellilinea;s__Bellilinea sp004347695	14	3300230	0	0	0	0	96.55	100	97.24
3300013886_3	>90% completeness AND <5% contamination	Nayfach et al.	d__Bacteria;p__Chloroflexota;c__Anaerolineae;o__Anaerolineales;f__Anaerolineaceae;g__Brevefilum;s__	45	2356480	2.88481	0	0	0	93.1	95	93.48
GCA_016841445.1_ASM1684144v1_genomic	>90% completeness AND <5% contamination	Genbank	d__Bacteria;p__Chloroflexota;c__Anaerolineae;o__Anaerolineales;f__Anaerolineaceae;g__Brevefilum;s__	8	3345900	0	0	0	0	96.55	95	96.24
GCA_016841525.1_ASM1684152v1_genomic	>90% completeness AND <5% contamination	Genbank	d__Bacteria;p__Chloroflexota;c__Anaerolineae;o__Anaerolineales;f__Anaerolineaceae;g__Brevefilum;s__	9	3204170	0	0	0	0	96.55	100	97.24
GCA_016887485.1_ASM1688748v1_genomic	>90% completeness AND <5% contamination	Genbank	d__Bacteria;p__Chloroflexota;c__Anaerolineae;o__Anaerolineales;f__Anaerolineaceae;g__Brevefilum;s__	2	2897040	0	0	0	0	98.28	100	98.624
1.9862e+06	>90% completeness AND <5% contamination	PATRIC	d__Bacteria;p__Chloroflexota;c__Anaerolineae;o__Anaerolineales;f__Anaerolineaceae;g__Brevefilum;s__Brevefilum fermentans	1	2574430	0	1.72	0	1.72	98.12	100	98.496
GCA_011620555.1_ASM1162055v1_genomic	>90% completeness AND <5% contamination	Genbank	d__Bacteria;p__Chloroflexota;c__Anaerolineae;o__Anaerolineales;f__Anaerolineaceae;g__Brevefilum;s__Brevefilum sp011620555	99	2321920	4.15389	0	0	0	96.21	85	93.968
1.87252e+06	>90% completeness AND <5% contamination	PATRIC	d__Bacteria;p__Chloroflexota;c__Anaerolineae;o__Anaerolineales;f__Anaerolineaceae;g__Ch132;s__	26	3123400	0.597746	0	0	0	96.55	85	94.24
GCA_013178185.1_ASM1317818v1_genomic	>90% completeness AND <5% contamination	Genbank	d__Bacteria;p__Chloroflexota;c__Anaerolineae;o__Anaerolineales;f__Anaerolineaceae;g__Ch132;s__Ch132 sp013178185	94	4313700	0	0	0	0	96.39	95	96.112
3300025702_24	>90% completeness AND <5% contamination	Nayfach et al.	d__Bacteria;p__Chloroflexota;c__Anaerolineae;o__Anaerolineales;f__Anaerolineaceae;g__Flexilinea;s__	30	2419800	0	1.72	0	1.72	89.66	95	90.728
GCA_905234325.1_RUG30100_genomic	>90% completeness AND <5% contamination	Genbank	d__Bacteria;p__Chloroflexota;c__Anaerolineae;o__Anaerolineales;f__Anaerolineaceae;g__Flexilinea;s__	397	3742170	4.03803	3.45	0	3.45	95.77	85	93.616
GCA_001192795.1_ASM119279v1_genomic	>90% completeness AND <5% contamination	Genbank	d__Bacteria;p__Chloroflexota;c__Anaerolineae;o__Anaerolineales;f__Anaerolineaceae;g__Flexilinea;s__Flexilinea flocculi	3	3510630	0	1.72	0	1.72	96.55	95	96.24
1.88981e+06	>90% completeness AND <5% contamination	PATRIC	d__Bacteria;p__Chloroflexota;c__Anaerolineae;o__Anaerolineales;f__Anaerolineaceae;g__Flexilinea;s__Flexilinea sp001717545	1	2945490	0	1.72	0	1.72	100	100	100
GCA_905372085.1_SRR9217393-mag-bin.14_genomic	>90% completeness AND <5% contamination	Genbank	d__Bacteria;p__Chloroflexota;c__Anaerolineae;o__Anaerolineales;f__Anaerolineaceae;g__Flexilinea;s__Flexilinea sp001717545	229	2554530	4.52451	0.16	100	0	95.69	90	94.552
GCA_012799995.1_ASM1279999v1_genomic	>90% completeness AND <5% contamination	Genbank	d__Bacteria;p__Chloroflexota;c__Anaerolineae;o__Anaerolineales;f__Anaerolineaceae;g__Flexilinea;s__Flexilinea sp012799995	117	2307500	3.35991	1.72	0	1.72	98.28	90	96.624
GCA_902786265.1_Rumen_uncultured_genome_RUG13159_genomic	>90% completeness AND <5% contamination	Genbank	d__Bacteria;p__Chloroflexota;c__Anaerolineae;o__Anaerolineales;f__Anaerolineaceae;g__Flexilinea;s__Flexilinea sp902786265	77	4609410	4.24414	2.66	0	2.66	92.08	95	92.664
GCA_013177815.1_ASM1317781v1_genomic	>90% completeness AND <5% contamination	Genbank	d__Bacteria;p__Chloroflexota;c__Anaerolineae;o__Anaerolineales;f__Anaerolineaceae;g__JABLXM01;s__JABLXM01 sp013177815	261	3235900	1.11376	1.72	100	0	93.1	95	93.48
GCA_012798535.1_ASM1279853v1_genomic	>90% completeness AND <5% contamination	Genbank	d__Bacteria;p__Chloroflexota;c__Anaerolineae;o__Anaerolineales;f__Anaerolineaceae;g__Leptolinea;s__Leptolinea sp012798535	95	3505630	1.11792	0.86	0	0.86	96.55	80	93.24
GCA_001306095.1_ASM130609v1_genomic	>90% completeness AND <5% contamination	Genbank	d__Bacteria;p__Chloroflexota;c__Anaerolineae;o__Anaerolineales;f__Anaerolineaceae;g__Leptolinea;s__Leptolinea tardivitalis	15	3676570	1.60421	0	0	0	98.28	100	98.624
GCA_001050255.2_ASM105025v2_genomic	>90% completeness AND <5% contamination	Genbank	d__Bacteria;p__Chloroflexota;c__Anaerolineae;o__Anaerolineales;f__Anaerolineaceae;g__Levilinea;s__Levilinea saccharolytica	42	4217180	0	3.45	100	0	96.55	95	96.24
GCA_001050235.2_ASM105023v2_genomic	>90% completeness AND <5% contamination	Genbank	d__Bacteria;p__Chloroflexota;c__Anaerolineae;o__Anaerolineales;f__Anaerolineaceae;g__Longilinea;s__Longilinea arvoryzae	2	4438310	0	0	0	0	96.55	95	96.24
2.07312e+06	>90% completeness AND <5% contamination	PATRIC	d__Bacteria;p__Chloroflexota;c__Anaerolineae;o__Anaerolineales;f__Anaerolineaceae;g__Ornatilinea;s__	176	4051810	0	0	0	0	93.1	90	92.48
2.08024e+06	>90% completeness AND <5% contamination	PATRIC	d__Bacteria;p__Chloroflexota;c__Anaerolineae;o__Anaerolineales;f__Anaerolineaceae;g__Ornatilinea;s__	130	5262200	0.577515	0	0	0	98.28	100	98.624
GCA_012797895.1_ASM1279789v1_genomic	>90% completeness AND <5% contamination	Genbank	d__Bacteria;p__Chloroflexota;c__Anaerolineae;o__Anaerolineales;f__Anaerolineaceae;g__Ornatilinea;s__	217	3996810	0.819403	1.72	0	1.72	92.79	85	91.232
GCA_001306115.1_ASM130611v1_genomic	>90% completeness AND <5% contamination	Genbank	d__Bacteria;p__Chloroflexota;c__Anaerolineae;o__Anaerolineales;f__Anaerolineaceae;g__Ornatilinea;s__Ornatilinea apprima	45	4338330	2.00123	0	0	0	96.55	100	97.24
GCA_013178095.1_ASM1317809v1_genomic	>90% completeness AND <5% contamination	Genbank	d__Bacteria;p__Chloroflexota;c__Anaerolineae;o__Anaerolineales;f__Anaerolineaceae;g__Pelolinea;s__Pelolinea sp013178095	23	2944340	0.0326049	0	0	0	96.55	100	97.24
GCA_003966975.1_ASM396697v1_genomic	>90% completeness AND <5% contamination	Genbank	d__Bacteria;p__Chloroflexota;c__Anaerolineae;o__Anaerolineales;f__Anaerolineaceae;g__Pelolinea;s__Pelolinea submarina	1	3519890	0	1.72	0	1.72	96.55	100	97.24
GCA_021107655.1_ASM2110765v1_genomic	>90% completeness AND <5% contamination	Genbank	d__Bacteria;p__Chloroflexota;c__Anaerolineae;o__Anaerolineales;f__Anaerolineaceae;g__SpSt-1165;s__	251	3036430	0	3.61	66.67	1.20321	93.1	95	93.48
3300025846_15	>90% completeness AND <5% contamination	Nayfach et al.	d__Bacteria;p__Chloroflexota;c__Anaerolineae;o__Anaerolineales;f__Anaerolineaceae;g__T78;s__	65	2457870	0	1.72	100	0	94.83	90	93.864
GCA_012512625.1_ASM1251262v1_genomic	>90% completeness AND <5% contamination	Genbank	d__Bacteria;p__Chloroflexota;c__Anaerolineae;o__Anaerolineales;f__Anaerolineaceae;g__T78;s__	496	2261640	1.42994	10.34	85.71	1.47759	97.96	75	93.368
GCA_002399085.1_ASM239908v1_genomic	>90% completeness AND <5% contamination	Genbank	d__Bacteria;p__Chloroflexota;c__Anaerolineae;o__Anaerolineales;f__Anaerolineaceae;g__T78;s__T78 sp002399085	44	2369050	2.59851	0	0	0	96.55	95	96.24
3300029822_23	>90% completeness AND <5% contamination	Nayfach et al.	d__Bacteria;p__Chloroflexota;c__Anaerolineae;o__Anaerolineales;f__Anaerolineaceae;g__T78;s__T78 sp002409625	22	1841410	2.69739	0	0	0	96.55	90	95.24
GCA_002424315.1_ASM242431v1_genomic	>90% completeness AND <5% contamination	Genbank	d__Bacteria;p__Chloroflexota;c__Anaerolineae;o__Anaerolineales;f__Anaerolineaceae;g__T78;s__T78 sp002409625	28	2110080	2.14257	0	0	0	98.28	95	97.624
3300013829_7	>90% completeness AND <5% contamination	Nayfach et al.	d__Bacteria;p__Chloroflexota;c__Anaerolineae;o__Anaerolineales;f__Anaerolineaceae;g__T78;s__T78 sp002432795	112	2332110	4.50708	0	0	0	96.55	95	96.24
3300022181_37	>90% completeness AND <5% contamination	Nayfach et al.	d__Bacteria;p__Chloroflexota;c__Anaerolineae;o__Anaerolineales;f__Anaerolineaceae;g__T78;s__T78 sp002432795	96	2669670	0.360344	0	0	0	98.28	100	98.624
GCA_012729755.1_ASM1272975v1_genomic	>90% completeness AND <5% contamination	Genbank	d__Bacteria;p__Chloroflexota;c__Anaerolineae;o__Anaerolineales;f__Anaerolineaceae;g__T78;s__T78 sp012729755	125	2225670	4.07428	3.61	7.69	3.33239	98.28	95	97.624
GCA_012839565.1_ASM1283956v1_genomic	>90% completeness AND <5% contamination	Genbank	d__Bacteria;p__Chloroflexota;c__Anaerolineae;o__Anaerolineales;f__Anaerolineaceae;g__T78;s__T78 sp012839565	20	1969550	0	0	0	0	98.28	100	98.624
GCA_012797815.1_ASM1279781v1_genomic	>90% completeness AND <5% contamination	Genbank	d__Bacteria;p__Chloroflexota;c__Anaerolineae;o__Anaerolineales;f__Anaerolineaceae;g__UBA4781;s__UBA4781 sp012797815	179	2723710	2.9089	0.86	0	0.86	96.55	85	94.24
GCA_012797975.1_ASM1279797v1_genomic	>90% completeness AND <5% contamination	Genbank	d__Bacteria;p__Chloroflexota;c__Anaerolineae;o__Anaerolineales;f__Anaerolineaceae;g__UBA4781;s__UBA4781 sp012797975	35	2572420	0.187372	0	0	0	94.83	90	93.864
GCA_012798455.1_ASM1279845v1_genomic	>90% completeness AND <5% contamination	Genbank	d__Bacteria;p__Chloroflexota;c__Anaerolineae;o__Anaerolineales;f__Anaerolineaceae;g__UBA4781;s__UBA4781 sp012798455	117	2681250	3.15077	0	0	0	94.83	95	94.864
2.0249e+06	>90% completeness AND <5% contamination	PATRIC	d__Bacteria;p__Chloroflexota;c__Anaerolineae;o__Anaerolineales;f__Anaerolineaceae;g__UBA5203;s__	162	4951660	0.19347	0	0	0	100	100	100
GCA_002412765.1_ASM241276v1_genomic	>90% completeness AND <5% contamination	Genbank	d__Bacteria;p__Chloroflexota;c__Anaerolineae;o__Anaerolineales;f__Anaerolineaceae;g__UBA5203;s__UBA5203 sp002412765	84	4449550	1.77119	0	0	0	93.89	95	94.112
3300025678_29	>90% completeness AND <5% contamination	Nayfach et al.	d__Bacteria;p__Chloroflexota;c__Anaerolineae;o__Anaerolineales;f__Anaerolineaceae;g__UBA6107;s__	39	2317800	0	0	0	0	91.38	90	91.104
GCA_002842015.1_ASM284201v1_genomic	>90% completeness AND <5% contamination	Genbank	d__Bacteria;p__Chloroflexota;c__Anaerolineae;o__Anaerolineales;f__Anaerolineaceae;g__UBA6107;s__	477	4998180	1.60398	4.31	0	4.31	94.93	95	94.944
GCA_018060515.1_ASM1806051v1_genomic	>90% completeness AND <5% contamination	Genbank	d__Bacteria;p__Chloroflexota;c__Anaerolineae;o__Anaerolineales;f__Anaerolineaceae;g__UBA6107;s__	165	2046170	1.20713	0	0	0	98.12	85	95.496
GCA_002428455.1_ASM242845v1_genomic	>90% completeness AND <5% contamination	Genbank	d__Bacteria;p__Chloroflexota;c__Anaerolineae;o__Anaerolineales;f__Anaerolineaceae;g__UBA6107;s__UBA6107 sp002428455	93	2213230	0.766753	3.79	0	3.79	93.1	80	90.48
GCA_003158355.1_20120600_E3D_genomic	>90% completeness AND <5% contamination	Genbank	d__Bacteria;p__Chloroflexota;c__Anaerolineae;o__Anaerolineales;f__Anaerolineaceae;g__UBA6107;s__UBA6107 sp003158355	292	2710920	0.997816	1.72	0	1.72	90.18	90	90.144
GCA_009773005.1_ASM977300v1_genomic	>90% completeness AND <5% contamination	Genbank	d__Bacteria;p__Chloroflexota;c__Anaerolineae;o__Anaerolineales;f__Anaerolineaceae;g__UBA6107;s__UBA6107 sp009773005	105	2860130	0	0	0	0	93.1	100	94.48
GCA_012797695.1_ASM1279769v1_genomic	>90% completeness AND <5% contamination	Genbank	d__Bacteria;p__Chloroflexota;c__Anaerolineae;o__Anaerolineales;f__Anaerolineaceae;g__UBA6107;s__UBA6107 sp012797695	440	3203750	0.19602	1.72	100	0	95.69	80	92.552
GCA_019429225.1_ASM1942922v1_genomic	>90% completeness AND <5% contamination	Genbank	d__Bacteria;p__Chloroflexota;c__Anaerolineae;o__Anaerolineales;f__Anaerolineaceae;g__UBA6170;s__	368	4195190	2.79153	1.72	100	0	96.55	90	95.24
GCA_001899005.1_ASM189900v1_genomic	>90% completeness AND <5% contamination	Genbank	d__Bacteria;p__Chloroflexota;c__Anaerolineae;o__Anaerolineales;f__Anaerolineaceae;g__UBA6170;s__UBA6170 sp001899005	28	4.18444e+06	0	0	0	0	98.28	90	96.624
GCA_002702705.1_ASM270270v1_genomic	>90% completeness AND <5% contamination	Genbank	d__Bacteria;p__Chloroflexota;c__Anaerolineae;o__Anaerolineales;f__Anaerolineaceae;g__UBA6170;s__UBA6170 sp002702705	74	5885090	1.25928	0	0	0	98.28	100	98.624
GCA_002840735.1_ASM284073v1_genomic	>90% completeness AND <5% contamination	Genbank	d__Bacteria;p__Chloroflexota;c__Anaerolineae;o__Anaerolineales;f__Anaerolineaceae;g__UBA6170;s__UBA6170 sp002840735	40	4106880	2.97087	0	0	0	98.28	100	98.624
GCA_002840755.1_ASM284075v1_genomic	>90% completeness AND <5% contamination	Genbank	d__Bacteria;p__Chloroflexota;c__Anaerolineae;o__Anaerolineales;f__Anaerolineaceae;g__UBA6170;s__UBA6170 sp002840755	101	6570800	2.52389	2.59	0	2.59	98.28	80	94.624
GCA_002841995.1_ASM284199v1_genomic	>90% completeness AND <5% contamination	Genbank	d__Bacteria;p__Chloroflexota;c__Anaerolineae;o__Anaerolineales;f__Anaerolineaceae;g__UBA6170;s__UBA6170 sp002841995	256	3948260	2.74551	2.59	0	2.59	94.67	85	92.736
GCA_002842045.1_ASM284204v1_genomic	>90% completeness AND <5% contamination	Genbank	d__Bacteria;p__Chloroflexota;c__Anaerolineae;o__Anaerolineales;f__Anaerolineaceae;g__UBA6170;s__UBA6170 sp002842045	56	4087870	0.917348	0	0	0	97.07	90	95.656
3300025882_14	>90% completeness AND <5% contamination	Nayfach et al.	d__Bacteria;p__Chloroflexota;c__Anaerolineae;o__Anaerolineales;f__Anaerolineaceae;g__UBA700;s__	55	3928870	0	0.86	0	0.86	89.66	95	90.728
2.07312e+06	>90% completeness AND <5% contamination	PATRIC	d__Bacteria;p__Chloroflexota;c__Anaerolineae;o__Anaerolineales;f__DRKV01;g__DRKV01;s__	325	3150010	1.15047	0	0	0	91.38	90	91.104
GCA_011322445.1_ASM1132244v1_genomic	>90% completeness AND <5% contamination	Genbank	d__Bacteria;p__Chloroflexota;c__Anaerolineae;o__Anaerolineales;f__DRMV01;g__DRMV01;s__DRMV01 sp011322445	53	2633730	0	0	0	0	100	95	99
GCA_015494085.1_ASM1549408v1_genomic	>90% completeness AND <5% contamination	Genbank	d__Bacteria;p__Chloroflexota;c__Anaerolineae;o__Anaerolineales;f__DRMV01;g__DRMV01;s__DRMV01 sp011322445	291	2348550	1.68615	1.72	0	1.72	89.66	95	90.728
GCA_011176535.1_ASM1117653v1_genomic	>90% completeness AND <5% contamination	Genbank	d__Bacteria;p__Chloroflexota;c__Anaerolineae;o__Anaerolineales;f__DRMV01;g__DUEP01;s__DUEP01 sp011176535	129	2271930	0	0	0	0	96.55	95	96.24
2.80296e+06	>90% completeness AND <5% contamination	PATRIC	d__Bacteria;p__Chloroflexota;c__Anaerolineae;o__Anaerolineales;f__E44-bin32;g__;s__	323	2963740	2.25593	0	0	0	90.05	90	90.04
GCA_011772595.1_ASM1177259v1_genomic	>90% completeness AND <5% contamination	Genbank	d__Bacteria;p__Chloroflexota;c__Anaerolineae;o__Anaerolineales;f__E44-bin32;g__;s__	589	5573340	0.0215311	3.45	0	3.45	93.1	90	92.48
GCA_016927115.1_ASM1692711v1_genomic	>90% completeness AND <5% contamination	Genbank	d__Bacteria;p__Chloroflexota;c__Anaerolineae;o__Anaerolineales;f__E44-bin32;g__;s__	204	4808940	0	0	0	0	99.84	95	98.872
GCA_016935855.1_ASM1693585v1_genomic	>90% completeness AND <5% contamination	Genbank	d__Bacteria;p__Chloroflexota;c__Anaerolineae;o__Anaerolineales;f__E44-bin32;g__;s__	65	3045360	3.96176	1.72	0	1.72	98.28	95	97.624
GCA_011046615.1_ASM1104661v1_genomic	>90% completeness AND <5% contamination	Genbank	d__Bacteria;p__Chloroflexota;c__Anaerolineae;o__Anaerolineales;f__E44-bin32;g__DSPQ01;s__DSPQ01 sp011046615	38	2448580	2.01668	0	0	0	89.5	95	90.6
GCA_011174825.1_ASM1117482v1_genomic	>90% completeness AND <5% contamination	Genbank	d__Bacteria;p__Chloroflexota;c__Anaerolineae;o__Anaerolineales;f__E44-bin32;g__DUEZ01;s__DUEZ01 sp011174825	102	3854900	1.72274	0	0	0	95.53	90	94.424
GCA_004376895.1_ASM437689v1_genomic	>90% completeness AND <5% contamination	Genbank	d__Bacteria;p__Chloroflexota;c__Anaerolineae;o__Anaerolineales;f__E44-bin32;g__E44-bin32;s__E44-bin32 sp004376895	299	2955050	0	0	0	0	93.1	85	91.48
GCA_011192015.1_ASM1119201v1_genomic	>90% completeness AND <5% contamination	Genbank	d__Bacteria;p__Chloroflexota;c__Anaerolineae;o__Anaerolineales;f__E44-bin32;g__W1033;s__W1033 sp011192015	108	2951560	0	0.16	0	0.16	92.95	95	93.36
3300005962_1	>90% completeness AND <5% contamination	Nayfach et al.	d__Bacteria;p__Chloroflexota;c__Anaerolineae;o__Anaerolineales;f__envOPS12;g__;s__	91	2700440	0.406971	1.72	0	1.72	100	100	100
3300007771_9	>90% completeness AND <5% contamination	Nayfach et al.	d__Bacteria;p__Chloroflexota;c__Anaerolineae;o__Anaerolineales;f__envOPS12;g__;s__	192	1827920	0.187645	0	0	0	94.83	80	91.864
3300014149_11	>90% completeness AND <5% contamination	Nayfach et al.	d__Bacteria;p__Chloroflexota;c__Anaerolineae;o__Anaerolineales;f__envOPS12;g__;s__	227	2672560	1.12701	3.45	0	3.45	96.55	100	97.24
3300025161_40	>90% completeness AND <5% contamination	Nayfach et al.	d__Bacteria;p__Chloroflexota;c__Anaerolineae;o__Anaerolineales;f__envOPS12;g__;s__	22	3133630	0	1.72	0	1.72	100	100	100
GCA_016191845.1_ASM1619184v1_genomic	>90% completeness AND <5% contamination	Genbank	d__Bacteria;p__Chloroflexota;c__Anaerolineae;o__Anaerolineales;f__EnvOPS12;g__;s__	18	4628750	0	2.59	0	2.59	100	95	99
GCA_016213105.1_ASM1621310v1_genomic	>90% completeness AND <5% contamination	Genbank	d__Bacteria;p__Chloroflexota;c__Anaerolineae;o__Anaerolineales;f__EnvOPS12;g__;s__	28	5385120	0	1.72	0	1.72	100	95	99
GCA_016865985.1_JGI_2017-08-21_genomic	>90% completeness AND <5% contamination	Genbank	d__Bacteria;p__Chloroflexota;c__Anaerolineae;o__Anaerolineales;f__EnvOPS12;g__;s__	421	3196860	0	3.92	0	3.92	92.95	95	93.36
GCA_016934715.1_ASM1693471v1_genomic	>90% completeness AND <5% contamination	Genbank	d__Bacteria;p__Chloroflexota;c__Anaerolineae;o__Anaerolineales;f__EnvOPS12;g__;s__	88	4089340	0	0	0	0	97.34	95	96.872
GCA_017743695.1_ASM1774369v1_genomic	>90% completeness AND <5% contamination	Genbank	d__Bacteria;p__Chloroflexota;c__Anaerolineae;o__Anaerolineales;f__EnvOPS12;g__;s__	292	2638110	0.55191	1.72	0	1.72	98.28	100	98.624
GCA_903822125.1_freshwater_MAG_---_LaPlata_bin-4513_genomic	>90% completeness AND <5% contamination	Genbank	d__Bacteria;p__Chloroflexota;c__Anaerolineae;o__Anaerolineales;f__EnvOPS12;g__CAIJPN01;s__CAIJPN01 sp903822545	189	5808820	3.49778	0	0	0	100	90	98
2.02672e+06	>90% completeness AND <5% contamination	PATRIC	d__Bacteria;p__Chloroflexota;c__Anaerolineae;o__Anaerolineales;f__EnvOPS12;g__DSXF01;s__	71	3056150	0	1.72	0	1.72	95.61	90	94.488
2.02672e+06	>90% completeness AND <5% contamination	PATRIC	d__Bacteria;p__Chloroflexota;c__Anaerolineae;o__Anaerolineales;f__EnvOPS12;g__DTJF01;s__	45	3035810	0	0	0	0	100	100	100
3300005529_73	>90% completeness AND <5% contamination	Nayfach et al.	d__Bacteria;p__Chloroflexota;c__Anaerolineae;o__Anaerolineales;f__envOPS12;g__Fen-1038;s__	64	3110700	0	0	0	0	100	100	100
3300027825_12	>90% completeness AND <5% contamination	Nayfach et al.	d__Bacteria;p__Chloroflexota;c__Anaerolineae;o__Anaerolineales;f__envOPS12;g__Fen-1038;s__	287	4.17527e+06	0.959459	0	0	0	94.2	85	92.36
GCA_016178765.1_ASM1617876v1_genomic	>90% completeness AND <5% contamination	Genbank	d__Bacteria;p__Chloroflexota;c__Anaerolineae;o__Anaerolineales;f__EnvOPS12;g__Fen-1038;s__	21	3014910	0.105476	0	0	0	98.28	95	97.624
GCA_016191495.1_ASM1619149v1_genomic	>90% completeness AND <5% contamination	Genbank	d__Bacteria;p__Chloroflexota;c__Anaerolineae;o__Anaerolineales;f__EnvOPS12;g__Fen-1038;s__	21	2968040	0	0	0	0	98.28	100	98.624
GCA_016744335.1_ASM1674433v1_genomic	>90% completeness AND <5% contamination	Genbank	d__Bacteria;p__Chloroflexota;c__Anaerolineae;o__Anaerolineales;f__EnvOPS12;g__NIOZ-UU36;s__	134	3619950	2.23042	1.72	0	1.72	99.84	100	99.872
GCA_013152325.1_ASM1315232v1_genomic	>90% completeness AND <5% contamination	Genbank	d__Bacteria;p__Chloroflexota;c__Anaerolineae;o__Anaerolineales;f__EnvOPS12;g__NIOZ-UU36;s__NIOZ-UU36 sp013152325	154	2946970	1.22906	0.86	100	0	100	95	99
GCA_014382535.1_ASM1438253v1_genomic	>90% completeness AND <5% contamination	Genbank	d__Bacteria;p__Chloroflexota;c__Anaerolineae;o__Anaerolineales;f__EnvOPS12;g__NIOZ-UU36;s__NIOZ-UU36 sp014382535	223	3649820	1.10499	0	0	0	100	85	97
71864.6	>90% completeness AND <5% contamination	PATRIC	d__Bacteria;p__Chloroflexota;c__Anaerolineae;o__Anaerolineales;f__EnvOPS12;g__OLB14;s__	637	5457800	0.418667	0.86	0	0.86	93.03	85	91.424
2.07312e+06	>90% completeness AND <5% contamination	PATRIC	d__Bacteria;p__Chloroflexota;c__Anaerolineae;o__Anaerolineales;f__EnvOPS12;g__OLB14;s__	15	3624830	3.30305	0	0	0	98.28	100	98.624
2.07312e+06	>90% completeness AND <5% contamination	PATRIC	d__Bacteria;p__Chloroflexota;c__Anaerolineae;o__Anaerolineales;f__EnvOPS12;g__OLB14;s__	25	4012490	0	0	0	0	94.83	95	94.864
2.07312e+06	>90% completeness AND <5% contamination	PATRIC	d__Bacteria;p__Chloroflexota;c__Anaerolineae;o__Anaerolineales;f__EnvOPS12;g__OLB14;s__	114	3217360	0.865306	0	0	0	94.83	90	93.864
3300009083_98	>90% completeness AND <5% contamination	Nayfach et al.	d__Bacteria;p__Chloroflexota;c__Anaerolineae;o__Anaerolineales;f__envOPS12;g__OLB14;s__	236	3281670	0.873945	1.72	100	0	92.63	90	92.104
3300013126_12	>90% completeness AND <5% contamination	Nayfach et al.	d__Bacteria;p__Chloroflexota;c__Anaerolineae;o__Anaerolineales;f__envOPS12;g__OLB14;s__	513	5058390	0.530801	4.39	66.67	1.46319	93.42	90	92.736
3300013126_24	>90% completeness AND <5% contamination	Nayfach et al.	d__Bacteria;p__Chloroflexota;c__Anaerolineae;o__Anaerolineales;f__envOPS12;g__OLB14;s__	343	4034130	0	0	0	0	93.1	80	90.48
3300013137_35	>90% completeness AND <5% contamination	Nayfach et al.	d__Bacteria;p__Chloroflexota;c__Anaerolineae;o__Anaerolineales;f__envOPS12;g__OLB14;s__	440	3841620	0.370156	3.45	50	1.725	92.24	90	91.792
3300013138_53	>90% completeness AND <5% contamination	Nayfach et al.	d__Bacteria;p__Chloroflexota;c__Anaerolineae;o__Anaerolineales;f__envOPS12;g__OLB14;s__	118	2961410	1.32606	0	0	0	94.83	90	93.864
3300017444_50	>90% completeness AND <5% contamination	Nayfach et al.	d__Bacteria;p__Chloroflexota;c__Anaerolineae;o__Anaerolineales;f__envOPS12;g__OLB14;s__	24	3279440	3.94427	0	0	0	100	95	99
3300021517_12	>90% completeness AND <5% contamination	Nayfach et al.	d__Bacteria;p__Chloroflexota;c__Anaerolineae;o__Anaerolineales;f__envOPS12;g__OLB14;s__	115	3631180	0.315875	0	0	0	93.97	95	94.176
3300027819_37	>90% completeness AND <5% contamination	Nayfach et al.	d__Bacteria;p__Chloroflexota;c__Anaerolineae;o__Anaerolineales;f__envOPS12;g__OLB14;s__	364	3344310	0.342672	0	0	0	95.69	100	96.552
3300027878_55	>90% completeness AND <5% contamination	Nayfach et al.	d__Bacteria;p__Chloroflexota;c__Anaerolineae;o__Anaerolineales;f__envOPS12;g__OLB14;s__	156	4239250	0.537595	1.72	100	0	100	100	100
GCA_014860745.1_ASM1486074v1_genomic	>90% completeness AND <5% contamination	Genbank	d__Bacteria;p__Chloroflexota;c__Anaerolineae;o__Anaerolineales;f__EnvOPS12;g__OLB14;s__	82	4323810	1.98852	0	0	0	98.28	95	97.624
GCA_014860805.1_ASM1486080v1_genomic	>90% completeness AND <5% contamination	Genbank	d__Bacteria;p__Chloroflexota;c__Anaerolineae;o__Anaerolineales;f__EnvOPS12;g__OLB14;s__	274	4232740	0.890676	0	0	0	96.55	90	95.24
GCA_016234495.1_ASM1623449v1_genomic	>90% completeness AND <5% contamination	Genbank	d__Bacteria;p__Chloroflexota;c__Anaerolineae;o__Anaerolineales;f__EnvOPS12;g__OLB14;s__	57	4095710	1.0091	1.72	100	0	100	95	99
GCA_016234555.1_ASM1623455v1_genomic	>90% completeness AND <5% contamination	Genbank	d__Bacteria;p__Chloroflexota;c__Anaerolineae;o__Anaerolineales;f__EnvOPS12;g__OLB14;s__	101	5804410	1.02939	0.16	0	0.16	100	95	99
GCA_016235425.1_ASM1623542v1_genomic	>90% completeness AND <5% contamination	Genbank	d__Bacteria;p__Chloroflexota;c__Anaerolineae;o__Anaerolineales;f__EnvOPS12;g__OLB14;s__	109	5000450	2.82535	0	0	0	98.28	85	95.624
GCA_016235445.1_ASM1623544v1_genomic	>90% completeness AND <5% contamination	Genbank	d__Bacteria;p__Chloroflexota;c__Anaerolineae;o__Anaerolineales;f__EnvOPS12;g__OLB14;s__	55	4134590	0	0	0	0	96.55	95	96.24
GCA_016703605.1_ASM1670360v1_genomic	>90% completeness AND <5% contamination	Genbank	d__Bacteria;p__Chloroflexota;c__Anaerolineae;o__Anaerolineales;f__EnvOPS12;g__OLB14;s__	26	4437850	0	0	0	0	100	100	100
GCA_016705895.1_ASM1670589v1_genomic	>90% completeness AND <5% contamination	Genbank	d__Bacteria;p__Chloroflexota;c__Anaerolineae;o__Anaerolineales;f__EnvOPS12;g__OLB14;s__	45	5205820	0	0.63	0	0.63	94.83	100	95.864
GCA_016709305.1_ASM1670930v1_genomic	>90% completeness AND <5% contamination	Genbank	d__Bacteria;p__Chloroflexota;c__Anaerolineae;o__Anaerolineales;f__EnvOPS12;g__OLB14;s__	63	4851660	0.376366	3.28	100	0	94.83	100	95.864
GCA_016711665.1_ASM1671166v1_genomic	>90% completeness AND <5% contamination	Genbank	d__Bacteria;p__Chloroflexota;c__Anaerolineae;o__Anaerolineales;f__EnvOPS12;g__OLB14;s__	85	5320940	4.35788	8.62	100	0	96.55	100	97.24
GCA_016714565.1_ASM1671456v1_genomic	>90% completeness AND <5% contamination	Genbank	d__Bacteria;p__Chloroflexota;c__Anaerolineae;o__Anaerolineales;f__EnvOPS12;g__OLB14;s__	41	4941900	3.32564	5.17	100	0	95.77	100	96.616
GCA_016714625.1_ASM1671462v1_genomic	>90% completeness AND <5% contamination	Genbank	d__Bacteria;p__Chloroflexota;c__Anaerolineae;o__Anaerolineales;f__EnvOPS12;g__OLB14;s__	47	5019950	0.346816	2.51	100	0	93.97	100	95.176
GCA_016715195.1_ASM1671519v1_genomic	>90% completeness AND <5% contamination	Genbank	d__Bacteria;p__Chloroflexota;c__Anaerolineae;o__Anaerolineales;f__EnvOPS12;g__OLB14;s__	67	4335220	2.92926	1.72	0	1.72	91.22	90	90.976
GCA_016717045.1_ASM1671704v1_genomic	>90% completeness AND <5% contamination	Genbank	d__Bacteria;p__Chloroflexota;c__Anaerolineae;o__Anaerolineales;f__EnvOPS12;g__OLB14;s__	40	4624420	0.0919034	1.72	100	0	99.84	100	99.872
GCA_016718275.1_ASM1671827v1_genomic	>90% completeness AND <5% contamination	Genbank	d__Bacteria;p__Chloroflexota;c__Anaerolineae;o__Anaerolineales;f__EnvOPS12;g__OLB14;s__	28	5057980	0.22677	1.72	100	0	91.38	100	93.104
GCA_016721315.1_ASM1672131v1_genomic	>90% completeness AND <5% contamination	Genbank	d__Bacteria;p__Chloroflexota;c__Anaerolineae;o__Anaerolineales;f__EnvOPS12;g__OLB14;s__	21	4491200	4.21491	0	0	0	98.28	100	98.624
GCA_016722685.1_ASM1672268v1_genomic	>90% completeness AND <5% contamination	Genbank	d__Bacteria;p__Chloroflexota;c__Anaerolineae;o__Anaerolineales;f__EnvOPS12;g__OLB14;s__	39	5410510	0.74651	1.72	100	0	99.14	100	99.312
GCA_016789305.1_ASM1678930v1_genomic	>90% completeness AND <5% contamination	Genbank	d__Bacteria;p__Chloroflexota;c__Anaerolineae;o__Anaerolineales;f__EnvOPS12;g__OLB14;s__	25	4877550	0	0	0	0	100	90	98
GCA_016789365.1_ASM1678936v1_genomic	>90% completeness AND <5% contamination	Genbank	d__Bacteria;p__Chloroflexota;c__Anaerolineae;o__Anaerolineales;f__EnvOPS12;g__OLB14;s__	399	3807600	0.561771	1.88	50	0.94	95.3	85	93.24
GCA_016866195.1_JGI_2017-08-21_genomic	>90% completeness AND <5% contamination	Genbank	d__Bacteria;p__Chloroflexota;c__Anaerolineae;o__Anaerolineales;f__EnvOPS12;g__OLB14;s__	435	3634260	0.294145	3.76	60	1.504	99.14	95	98.312
GCA_016866215.1_JGI_2017-08-21_genomic	>90% completeness AND <5% contamination	Genbank	d__Bacteria;p__Chloroflexota;c__Anaerolineae;o__Anaerolineales;f__EnvOPS12;g__OLB14;s__	128	3742700	1.49651	1.72	100	0	100	100	100
GCA_017303655.1_ASM1730365v1_genomic	>90% completeness AND <5% contamination	Genbank	d__Bacteria;p__Chloroflexota;c__Anaerolineae;o__Anaerolineales;f__EnvOPS12;g__OLB14;s__	172	4605710	2.19119	4.48	83.33	0.746816	90.91	90	90.728
GCA_017985655.1_ASM1798565v1_genomic	>90% completeness AND <5% contamination	Genbank	d__Bacteria;p__Chloroflexota;c__Anaerolineae;o__Anaerolineales;f__EnvOPS12;g__OLB14;s__	135	3870270	2.09391	0	0	0	96.55	95	96.24
GCA_019637775.1_ASM1963777v1_genomic	>90% completeness AND <5% contamination	Genbank	d__Bacteria;p__Chloroflexota;c__Anaerolineae;o__Anaerolineales;f__EnvOPS12;g__OLB14;s__	5	4.10897e+06	0	0	0	0	100	100	100
GCA_919902735.1_Hainich-H51-bin274-1-1_genomic	>90% completeness AND <5% contamination	Genbank	d__Bacteria;p__Chloroflexota;c__Anaerolineae;o__Anaerolineales;f__EnvOPS12;g__OLB14;s__	356	4258000	0.981916	1.72	0	1.72	96.39	80	93.112
GCA_001567105.1_ASM156710v1_genomic	>90% completeness AND <5% contamination	Genbank	d__Bacteria;p__Chloroflexota;c__Anaerolineae;o__Anaerolineales;f__EnvOPS12;g__OLB14;s__OLB14 sp001567105	74	3041540	4.37246	0	0	0	96.55	100	97.24
3300013502_6	>90% completeness AND <5% contamination	Nayfach et al.	d__Bacteria;p__Chloroflexota;c__Anaerolineae;o__Anaerolineales;f__envOPS12;g__OLB14;s__OLB14 sp002343775	371	4553940	1.66098	1.72	100	0	93.97	90	93.176
GCA_002345215.1_ASM234521v1_genomic	>90% completeness AND <5% contamination	Genbank	d__Bacteria;p__Chloroflexota;c__Anaerolineae;o__Anaerolineales;f__EnvOPS12;g__OLB14;s__OLB14 sp002345215	63	3599940	2.88533	0	0	0	99.69	100	99.752
2.07312e+06	>90% completeness AND <5% contamination	PATRIC	d__Bacteria;p__Chloroflexota;c__Anaerolineae;o__Anaerolineales;f__EnvOPS12;g__OLB14;s__OLB14 sp003599285	155	3668500	0.477579	0	0	0	98.28	90	96.624
GCA_015075725.1_ASM1507572v1_genomic	>90% completeness AND <5% contamination	Genbank	d__Bacteria;p__Chloroflexota;c__Anaerolineae;o__Anaerolineales;f__EnvOPS12;g__OLB14;s__OLB14 sp008363285	4	4790800	1.00839	1.72	0	1.72	100	100	100
GCA_009885945.1_ASM988594v1_genomic	>90% completeness AND <5% contamination	Genbank	d__Bacteria;p__Chloroflexota;c__Anaerolineae;o__Anaerolineales;f__EnvOPS12;g__OLB14;s__OLB14 sp009885945	209	3433620	0.47297	0	0	0	99.84	85	96.872
GCA_013112685.1_ASM1311268v1_genomic	>90% completeness AND <5% contamination	Genbank	d__Bacteria;p__Chloroflexota;c__Anaerolineae;o__Anaerolineales;f__EnvOPS12;g__OLB14;s__OLB14 sp013112685	2	4617960	0	0	0	0	87.93	100	90.344
GCA_013140605.1_ASM1314060v1_genomic	>90% completeness AND <5% contamination	Genbank	d__Bacteria;p__Chloroflexota;c__Anaerolineae;o__Anaerolineales;f__EnvOPS12;g__OLB14;s__OLB14 sp013140605	132	3932000	3.0707	0	0	0	93.1	90	92.48
GCA_013388795.1_ASM1338879v1_genomic	>90% completeness AND <5% contamination	Genbank	d__Bacteria;p__Chloroflexota;c__Anaerolineae;o__Anaerolineales;f__EnvOPS12;g__OLB14;s__OLB14 sp013388795	357	3216890	1.03578	0	0	0	90.44	100	92.352
GCA_014379595.1_ASM1437959v1_genomic	>90% completeness AND <5% contamination	Genbank	d__Bacteria;p__Chloroflexota;c__Anaerolineae;o__Anaerolineales;f__EnvOPS12;g__OLB14;s__OLB14 sp014379595	72	4473200	0.762318	1.88	50	0.94	98.28	95	97.624
GCA_013360835.1_ASM1336083v1_genomic	>90% completeness AND <5% contamination	Genbank	d__Bacteria;p__Chloroflexota;c__Anaerolineae;o__Anaerolineales;f__EnvOPS12;g__OLB14;s__OLB14 sp900696595	192	3357840	2.70203	1.72	100	0	96.55	90	95.24
GCA_019187555.1_ASM1918755v1_genomic	>90% completeness AND <5% contamination	Genbank	d__Bacteria;p__Chloroflexota;c__Anaerolineae;o__Anaerolineales;f__EnvOPS12;g__OLB14;s__OLB14 sp900696595	62	4061650	0.459665	0	0	0	100	100	100
GCA_903837815.1_freshwater_MAG_---_LaPlata_bin-4228_genomic	>90% completeness AND <5% contamination	Genbank	d__Bacteria;p__Chloroflexota;c__Anaerolineae;o__Anaerolineales;f__EnvOPS12;g__OLB14;s__OLB14 sp903837815	709	4232450	0.0647379	5.33	75	1.3325	96.55	80	93.24
GCA_903914955.1_freshwater_MAG_---_LJ-3-65m_bin-0054_genomic	>90% completeness AND <5% contamination	Genbank	d__Bacteria;p__Chloroflexota;c__Anaerolineae;o__Anaerolineales;f__EnvOPS12;g__OLB14;s__OLB14 sp903914955	470	4397590	0.329044	5.17	66.67	1.72316	96.55	80	93.24
GCA_001796335.1_ASM179633v1_genomic	>90% completeness AND <5% contamination	Genbank	d__Bacteria;p__Chloroflexota;c__Anaerolineae;o__Anaerolineales;f__EnvOPS12;g__UBA12087;s__UBA12087 sp001796335	28	3374890	0	1.72	0	1.72	100	100	100
1.87252e+06	>90% completeness AND <5% contamination	PATRIC	d__Bacteria;p__Chloroflexota;c__Anaerolineae;o__Anaerolineales;f__EnvOPS12;g__UBA12294;s__	54	3694950	0	0	0	0	97.41	100	97.928
2.07312e+06	>90% completeness AND <5% contamination	PATRIC	d__Bacteria;p__Chloroflexota;c__Anaerolineae;o__Anaerolineales;f__EnvOPS12;g__UBA12294;s__	101	3717230	0	12.07	75	3.0175	93.1	85	91.48
3300005985_20	>90% completeness AND <5% contamination	Nayfach et al.	d__Bacteria;p__Chloroflexota;c__Anaerolineae;o__Anaerolineales;f__envOPS12;g__UBA12294;s__	431	5380730	0	1.72	100	0	98.28	95	97.624
3300012533_44	>90% completeness AND <5% contamination	Nayfach et al.	d__Bacteria;p__Chloroflexota;c__Anaerolineae;o__Anaerolineales;f__envOPS12;g__UBA12294;s__	196	3608250	0.365274	0	0	0	94.83	85	92.864
3300017444_35	>90% completeness AND <5% contamination	Nayfach et al.	d__Bacteria;p__Chloroflexota;c__Anaerolineae;o__Anaerolineales;f__envOPS12;g__UBA12294;s__	17	4247700	0	0	0	0	100	95	99
3300025859_13	>90% completeness AND <5% contamination	Nayfach et al.	d__Bacteria;p__Chloroflexota;c__Anaerolineae;o__Anaerolineales;f__envOPS12;g__UBA12294;s__	37	4078010	0	1.72	100	0	100	100	100
GCA_015075275.1_ASM1507527v1_genomic	>90% completeness AND <5% contamination	Genbank	d__Bacteria;p__Chloroflexota;c__Anaerolineae;o__Anaerolineales;f__EnvOPS12;g__UBA12294;s__	2	2882110	0	0	0	0	98.28	100	98.624
GCA_016208405.1_ASM1620840v1_genomic	>90% completeness AND <5% contamination	Genbank	d__Bacteria;p__Chloroflexota;c__Anaerolineae;o__Anaerolineales;f__EnvOPS12;g__UBA12294;s__	29	3753840	0	0	0	0	91.38	90	91.104
GCA_016716235.1_ASM1671623v1_genomic	>90% completeness AND <5% contamination	Genbank	d__Bacteria;p__Chloroflexota;c__Anaerolineae;o__Anaerolineales;f__EnvOPS12;g__UBA12294;s__	7	4139010	0	1.72	100	0	100	100	100
GCA_016721115.1_ASM1672111v1_genomic	>90% completeness AND <5% contamination	Genbank	d__Bacteria;p__Chloroflexota;c__Anaerolineae;o__Anaerolineales;f__EnvOPS12;g__UBA12294;s__	2	5022720	0	0	0	0	100	100	100
GCA_016932715.1_ASM1693271v1_genomic	>90% completeness AND <5% contamination	Genbank	d__Bacteria;p__Chloroflexota;c__Anaerolineae;o__Anaerolineales;f__EnvOPS12;g__UBA12294;s__	195	4938460	2.33089	1.72	0	1.72	95.69	90	94.552
GCA_019187525.1_ASM1918752v1_genomic	>90% completeness AND <5% contamination	Genbank	d__Bacteria;p__Chloroflexota;c__Anaerolineae;o__Anaerolineales;f__EnvOPS12;g__UBA12294;s__	31	3834490	0	0	0	0	93.1	90	92.48
GCA_014584545.1_ASM1458454v1_genomic	>90% completeness AND <5% contamination	Genbank	d__Bacteria;p__Chloroflexota;c__Anaerolineae;o__Anaerolineales;f__EnvOPS12;g__UBA12294;s__UBA12294 sp002050275	36	2616740	0	0	0	0	93.1	90	92.48
GCA_002418205.1_ASM241820v1_genomic	>90% completeness AND <5% contamination	Genbank	d__Bacteria;p__Chloroflexota;c__Anaerolineae;o__Anaerolineales;f__EnvOPS12;g__UBA12294;s__UBA12294 sp002418205	90	4501150	0	1.72	0	1.72	98.28	95	97.624
GCA_003484265.1_ASM348426v1_genomic	>90% completeness AND <5% contamination	Genbank	d__Bacteria;p__Chloroflexota;c__Anaerolineae;o__Anaerolineales;f__EnvOPS12;g__UBA12294;s__UBA12294 sp003484265	253	3382090	0.790044	0.16	0	0.16	90.13	95	91.104
GCA_019187465.1_ASM1918746v1_genomic	>90% completeness AND <5% contamination	Genbank	d__Bacteria;p__Chloroflexota;c__Anaerolineae;o__Anaerolineales;f__EnvOPS12;g__UBA12294;s__UBA12294 sp003577395	16	3777910	0	0	0	0	100	100	100
GCA_013360875.1_ASM1336087v1_genomic	>90% completeness AND <5% contamination	Genbank	d__Bacteria;p__Chloroflexota;c__Anaerolineae;o__Anaerolineales;f__EnvOPS12;g__UBA12294;s__UBA12294 sp013360875	208	3987940	0.633159	0	0	0	98.28	90	96.624
GCA_013388685.1_ASM1338868v1_genomic	>90% completeness AND <5% contamination	Genbank	d__Bacteria;p__Chloroflexota;c__Anaerolineae;o__Anaerolineales;f__EnvOPS12;g__UBA12294;s__UBA12294 sp013388685	63	3526990	0	1.72	0	1.72	100	95	99
1.87252e+06	>90% completeness AND <5% contamination	PATRIC	d__Bacteria;p__Chloroflexota;c__Anaerolineae;o__Anaerolineales;f__EnvOPS12;g__UBA5195;s__	641	3299750	0	1.88	50	0.94	98.28	85	95.624
GCA_002412925.1_ASM241292v1_genomic	>90% completeness AND <5% contamination	Genbank	d__Bacteria;p__Chloroflexota;c__Anaerolineae;o__Anaerolineales;f__EnvOPS12;g__UBA5195;s__UBA5195 sp002412925	111	5468540	1.13723	0	0	0	93.1	95	93.48
GCA_003130845.1_ASM313084v1_genomic	>90% completeness AND <5% contamination	Genbank	d__Bacteria;p__Chloroflexota;c__Anaerolineae;o__Anaerolineales;f__EnvOPS12;g__UBA5195;s__UBA5195 sp003130845	159	3767540	0	0.86	100	0	98.28	90	96.624
GCA_011047105.1_ASM1104710v1_genomic	>90% completeness AND <5% contamination	Genbank	d__Bacteria;p__Chloroflexota;c__Anaerolineae;o__Anaerolineales;f__EnvOPS12;g__UBA5195;s__UBA5195 sp011047105	34	4440310	0	0	0	0	100	100	100
452435	>90% completeness AND <5% contamination	PATRIC	d__Bacteria;p__Chloroflexota;c__Anaerolineae;o__Anaerolineales;f__EnvOPS12;g__UBA5195;s__UBA5195 sp903838415	153	5469390	0	0	0	0	98.28	90	96.624
GCA_903846015.1_freshwater_MAG_---_Umea1p4_bin-235_genomic	>90% completeness AND <5% contamination	Genbank	d__Bacteria;p__Chloroflexota;c__Anaerolineae;o__Anaerolineales;f__EnvOPS12;g__UBA5195;s__UBA5195 sp903846015	662	6508200	0.0316524	0	0	0	98.28	80	94.624
GCA_903854805.1_freshwater_MAG_---_LJ_bin-4354_genomic	>90% completeness AND <5% contamination	Genbank	d__Bacteria;p__Chloroflexota;c__Anaerolineae;o__Anaerolineales;f__EnvOPS12;g__UBA5195;s__UBA5195 sp903854805	635	6032070	0.134116	1.72	0	1.72	99.22	85	96.376
GCA_903835775.1_freshwater_MAG_---_LaPlata-7m-a_bin-035_genomic	>90% completeness AND <5% contamination	Genbank	d__Bacteria;p__Chloroflexota;c__Anaerolineae;o__Anaerolineales;f__EnvOPS12;g__UBA5195;s__UBA5195 sp903875215	40	3771200	2.33692	0	0	0	100	95	99
GCA_903882765.1_freshwater_MAG_---_Loclat_bin-13074_genomic	>90% completeness AND <5% contamination	Genbank	d__Bacteria;p__Chloroflexota;c__Anaerolineae;o__Anaerolineales;f__EnvOPS12;g__UBA5195;s__UBA5195 sp903882765	506	2750590	0.458084	0.86	100	0	94.67	75	90.736
GCA_903911955.1_freshwater_MAG_---_Umea_bin-08041_genomic	>90% completeness AND <5% contamination	Genbank	d__Bacteria;p__Chloroflexota;c__Anaerolineae;o__Anaerolineales;f__EnvOPS12;g__UBA5195;s__UBA5195 sp903910795	518	5444840	0	0	0	0	100	80	96
GCA_002418215.1_ASM241821v1_genomic	>90% completeness AND <5% contamination	Genbank	d__Bacteria;p__Chloroflexota;c__Anaerolineae;o__Anaerolineales;f__EnvOPS12;g__UBA5796;s__UBA5796 sp002418215	172	4857930	4.78496	0	0	0	95.69	95	95.552
167965	>90% completeness AND <5% contamination	PATRIC	d__Bacteria;p__Chloroflexota;c__Anaerolineae;o__Anaerolineales;f__EnvOPS12;g__UBA7227;s__	332	2947570	0.648331	6.11	40	3.666	88.87	95	90.096
3300017419_12	>90% completeness AND <5% contamination	Nayfach et al.	d__Bacteria;p__Chloroflexota;c__Anaerolineae;o__Anaerolineales;f__envOPS12;g__UBA7227;s__	129	2669150	1.05876	0	0	0	98.28	95	97.624
GCA_016234485.1_ASM1623448v1_genomic	>90% completeness AND <5% contamination	Genbank	d__Bacteria;p__Chloroflexota;c__Anaerolineae;o__Anaerolineales;f__EnvOPS12;g__UBA7227;s__	68	4459360	0.589995	0	0	0	94.83	95	94.864
GCA_019187665.1_ASM1918766v1_genomic	>90% completeness AND <5% contamination	Genbank	d__Bacteria;p__Chloroflexota;c__Anaerolineae;o__Anaerolineales;f__EnvOPS12;g__UBA7227;s__	57	3525300	0.92446	0	0	0	98.28	100	98.624
3300025631_15	>90% completeness AND <5% contamination	Nayfach et al.	d__Bacteria;p__Chloroflexota;c__Anaerolineae;o__Anaerolineales;f__envOPS12;g__UBA7227;s__UBA7227 sp002473085	284	2901170	0.673866	0	0	0	89.5	95	90.6
GCA_003577035.1_ASM357703v1_genomic	>90% completeness AND <5% contamination	Genbank	d__Bacteria;p__Chloroflexota;c__Anaerolineae;o__Anaerolineales;f__EnvOPS12;g__UBA7227;s__UBA7227 sp002473085	153	2971040	0.798037	2.66	62.5	0.9975	98.28	90	96.624
GCA_016860645.1_ASM1686064v1_genomic	>90% completeness AND <5% contamination	Genbank	d__Bacteria;p__Chloroflexota;c__Anaerolineae;o__Anaerolineales;f__EnvOPS12;g__UBA7227;s__UBA7227 sp002473085	153	3714730	1.09833	0	0	0	100	100	100
GCA_017312345.1_imperfectus_1.0_genomic	>90% completeness AND <5% contamination	Genbank	d__Bacteria;p__Chloroflexota;c__Anaerolineae;o__Anaerolineales;f__EnvOPS12;g__UBA7227;s__UBA7227 sp002473085	4	3705800	0	0	0	0	95.61	100	96.488
GCA_019454805.1_ASM1945480v1_genomic	>90% completeness AND <5% contamination	Genbank	d__Bacteria;p__Chloroflexota;c__Anaerolineae;o__Anaerolineales;f__EnvOPS12;g__UBA7227;s__UBA7227 sp002473085	60	3045900	0.818477	0	0	0	98.28	100	98.624
3300009503_114	>90% completeness AND <5% contamination	Nayfach et al.	d__Bacteria;p__Chloroflexota;c__Anaerolineae;o__Anaerolineales;f__envOPS12;g__UBA877;s__	210	2098900	0.756587	0	0	0	93.1	100	94.48
3300025716_7	>90% completeness AND <5% contamination	Nayfach et al.	d__Bacteria;p__Chloroflexota;c__Anaerolineae;o__Anaerolineales;f__envOPS12;g__UBA877;s__	249	2907530	0.558206	0.16	0	0.16	94.83	90	93.864
3300027825_13	>90% completeness AND <5% contamination	Nayfach et al.	d__Bacteria;p__Chloroflexota;c__Anaerolineae;o__Anaerolineales;f__envOPS12;g__UBA877;s__	220	4101800	0	1.88	50	0.94	95.69	90	94.552
3300027896_56	>90% completeness AND <5% contamination	Nayfach et al.	d__Bacteria;p__Chloroflexota;c__Anaerolineae;o__Anaerolineales;f__envOPS12;g__UBA877;s__	83	2623190	0	0	0	0	93.1	90	92.48
GCA_017882125.1_ASM1788212v1_genomic	>90% completeness AND <5% contamination	Genbank	d__Bacteria;p__Chloroflexota;c__Anaerolineae;o__Anaerolineales;f__EnvOPS12;g__UBA877;s__	274	2817360	0	2.59	50	1.295	91.38	95	92.104
GCA_009772985.1_ASM977298v1_genomic	>90% completeness AND <5% contamination	Genbank	d__Bacteria;p__Chloroflexota;c__Anaerolineae;o__Anaerolineales;f__EnvOPS12;g__UBA877;s__UBA877 sp009772985	26	3032110	0	0	0	0	97.34	100	97.872
444458	>90% completeness AND <5% contamination	PATRIC	d__Bacteria;p__Chloroflexota;c__Anaerolineae;o__Anaerolineales;f__EnvOPS12;g__UBA877;s__UBA877 sp903873975	330	3562550	0	2.74	33.33	1.82676	96.3	65	90.04
GCA_903931905.1_freshwater_MAG_---_AlinenSedimentsCore1_bin-0177_genomic	>90% completeness AND <5% contamination	Genbank	d__Bacteria;p__Chloroflexota;c__Anaerolineae;o__Anaerolineales;f__EnvOPS12;g__UBA877;s__UBA877 sp903884265	529	3497500	0	3.79	100	0	96.55	85	94.24
1.87252e+06	>90% completeness AND <5% contamination	PATRIC	d__Bacteria;p__Chloroflexota;c__Anaerolineae;o__Anaerolineales;f__EnvOPS12;g__UBA8950;s__	125	3108190	3.76554	0	0	0	93.1	90	92.48
2.07312e+06	>90% completeness AND <5% contamination	PATRIC	d__Bacteria;p__Chloroflexota;c__Anaerolineae;o__Anaerolineales;f__EnvOPS12;g__UBA8950;s__	279	3992050	3.80957	1.72	100	0	98.28	75	93.624
3300025525_6	>90% completeness AND <5% contamination	Nayfach et al.	d__Bacteria;p__Chloroflexota;c__Anaerolineae;o__Anaerolineales;f__envOPS12;g__UBA8950;s__	221	4542720	4.69256	0	0	0	94.83	100	95.864
GCA_001872455.1_ASM187245v1_genomic	>90% completeness AND <5% contamination	Genbank	d__Bacteria;p__Chloroflexota;c__Anaerolineae;o__Anaerolineales;f__EnvOPS12;g__UBA8950;s__UBA8950 sp001872455	87	2993960	0	0	0	0	98.28	95	97.624
GCA_002840685.1_ASM284068v1_genomic	>90% completeness AND <5% contamination	Genbank	d__Bacteria;p__Chloroflexota;c__Anaerolineae;o__Anaerolineales;f__EnvOPS12;g__UBA8950;s__UBA8950 sp002840685	39	5259360	0	0.86	0	0.86	100	100	100
3300025477_8	>90% completeness AND <5% contamination	Nayfach et al.	d__Bacteria;p__Chloroflexota;c__Anaerolineae;o__Anaerolineales;f__RBG-16-64-43;g__;s__	43	3361450	3.39199	0	0	0	98.28	100	98.624
GCA_016928575.1_ASM1692857v1_genomic	>90% completeness AND <5% contamination	Genbank	d__Bacteria;p__Chloroflexota;c__Anaerolineae;o__Anaerolineales;f__RBG-16-64-43;g__FEN-1073;s__	137	3838890	0	0	0	0	98.12	90	96.496
GCA_016932475.1_ASM1693247v1_genomic	>90% completeness AND <5% contamination	Genbank	d__Bacteria;p__Chloroflexota;c__Anaerolineae;o__Anaerolineales;f__RBG-16-64-43;g__FEN-1073;s__	129	3646930	4.31952	0.86	0	0.86	98.12	90	96.496
GCA_003141675.1_20120800_E2D_genomic	>90% completeness AND <5% contamination	Genbank	d__Bacteria;p__Chloroflexota;c__Anaerolineae;o__Anaerolineales;f__RBG-16-64-43;g__FEN-1073;s__FEN-1073 sp003141675	105	2822930	0	0	0	0	94.67	95	94.736
3300027690_53	>90% completeness AND <5% contamination	Nayfach et al.	d__Bacteria;p__Chloroflexota;c__Anaerolineae;o__Anaerolineales;f__UBA11579;g__;s__	250	2397180	2.59555	0.86	100	0	93.97	85	92.176
GCA_018670595.1_ASM1867059v1_genomic	>90% completeness AND <5% contamination	Genbank	d__Bacteria;p__Chloroflexota;c__Anaerolineae;o__Anaerolineales;f__UBA11579;g__;s__	36	2842970	0	0	0	0	97.41	100	97.928
GCA_019454165.1_ASM1945416v1_genomic	>90% completeness AND <5% contamination	Genbank	d__Bacteria;p__Chloroflexota;c__Anaerolineae;o__Anaerolineales;f__UBA11579;g__;s__	1	2241820	0	0	0	0	98.28	100	98.624
GCA_019456165.1_ASM1945616v1_genomic	>90% completeness AND <5% contamination	Genbank	d__Bacteria;p__Chloroflexota;c__Anaerolineae;o__Anaerolineales;f__UBA11579;g__;s__	63	3803360	3.46273	0	0	0	98.28	100	98.624
GCA_019637675.1_ASM1963767v1_genomic	>90% completeness AND <5% contamination	Genbank	d__Bacteria;p__Chloroflexota;c__Anaerolineae;o__Anaerolineales;f__UBA11579;g__;s__	3	2252490	0	0	0	0	98.28	90	96.624
GCA_019637755.1_ASM1963775v1_genomic	>90% completeness AND <5% contamination	Genbank	d__Bacteria;p__Chloroflexota;c__Anaerolineae;o__Anaerolineales;f__UBA11579;g__;s__	2	2263230	0	0	0	0	98.28	100	98.624
GCA_019637805.1_ASM1963780v1_genomic	>90% completeness AND <5% contamination	Genbank	d__Bacteria;p__Chloroflexota;c__Anaerolineae;o__Anaerolineales;f__UBA11579;g__;s__	5	2337950	0.110353	0	0	0	98.28	100	98.624
GCA_008501685.1_ASM850168v1_genomic	>90% completeness AND <5% contamination	Genbank	d__Bacteria;p__Chloroflexota;c__Anaerolineae;o__Anaerolineales;f__UBA11579;g__CFX15;s__CFX15 sp013112575	12	5495230	0	0.16	0	0.16	98.28	100	98.624
GCA_900299355.1_Unknown_Anaerolineaceae_bacterium_AM_2104_genomic	>90% completeness AND <5% contamination	Genbank	d__Bacteria;p__Chloroflexota;c__Anaerolineae;o__Anaerolineales;f__UBA11579;g__OMJR01;s__OMJR01 sp900299355	173	2109590	4.77865	0	0	0	93.57	95	93.856
GCA_016191875.1_ASM1619187v1_genomic	>90% completeness AND <5% contamination	Genbank	d__Bacteria;p__Chloroflexota;c__Anaerolineae;o__Anaerolineales;f__UBA11579;g__SCUK01;s__	36	3207830	4.8444	0	0	0	91.38	95	92.104
3300023208_13	>90% completeness AND <5% contamination	Nayfach et al.	d__Bacteria;p__Chloroflexota;c__Anaerolineae;o__Anaerolineales;f__UBA11657;g__;s__	42	2913340	0	0	0	0	98.28	100	98.624
GCA_003569365.1_ASM356936v1_genomic	>90% completeness AND <5% contamination	Genbank	d__Bacteria;p__Chloroflexota;c__Anaerolineae;o__Anaerolineales;f__UBA11657;g__BD1;s__BD1 sp003569365	30	2627480	0	0	0	0	96.55	85	94.24
3300020467_17	>90% completeness AND <5% contamination	Nayfach et al.	d__Bacteria;p__Chloroflexota;c__Anaerolineae;o__Anaerolineales;f__UBA11657;g__UBA11657;s__UBA11657 sp002296125	109	1983430	0	0	0	0	90.13	95	91.104
GCA_913048205.1_ERR599156_bin.143_MetaBAT_v2.12.1_MAG_genomic	>90% completeness AND <5% contamination	Genbank	d__Bacteria;p__Chloroflexota;c__Anaerolineae;o__Anaerolineales;f__UBA11657;g__UBA11657;s__UBA11657 sp002346435	38	2130380	0	1.72	0	1.72	96.39	90	95.112
3300024259_11	>90% completeness AND <5% contamination	Nayfach et al.	d__Bacteria;p__Chloroflexota;c__Anaerolineae;o__Anaerolineales;f__UBA11858;g__;s__	144	4214910	2.02187	1.72	0	1.72	98.28	100	98.624
GCA_018335275.1_ASM1833527v1_genomic	>90% completeness AND <5% contamination	Genbank	d__Bacteria;p__Chloroflexota;c__Anaerolineae;o__Anaerolineales;f__UBA11858;g__B10-G9;s__	204	2470280	0	0	0	0	94.2	100	95.36
GCA_021108255.1_ASM2110825v1_genomic	>90% completeness AND <5% contamination	Genbank	d__Bacteria;p__Chloroflexota;c__Anaerolineae;o__Anaerolineales;f__UBA11858;g__B10-G9;s__	298	2978550	0	2.04	33.33	1.36007	96.39	90	95.112
GCA_016865865.1_JGI_2017-08-21_genomic	>90% completeness AND <5% contamination	Genbank	d__Bacteria;p__Chloroflexota;c__Anaerolineae;o__Anaerolineales;f__UBA11858;g__NIOZ-UU35;s__	168	3246050	2.27969	0	0	0	96.55	100	97.24
GCA_014859065.1_ASM1485906v1_genomic	>90% completeness AND <5% contamination	Genbank	d__Bacteria;p__Chloroflexota;c__Anaerolineae;o__Anaerolineales;f__UBA4823;g__;s__	491	3995650	2.08827	0.86	0	0.86	96.55	95	96.24
GCA_020349245.1_ASM2034924v1_genomic	>90% completeness AND <5% contamination	Genbank	d__Bacteria;p__Chloroflexota;c__Anaerolineae;o__Anaerolineales;f__UBA4823;g__9FT-COMBO-55-16;s__	1	4515560	0	0	0	0	91.38	90	91.104
2.80296e+06	>90% completeness AND <5% contamination	PATRIC	d__Bacteria;p__Chloroflexota;c__Anaerolineae;o__Anaerolineales;f__UBA4823;g__CAIQJJ01;s__	239	6434380	2.0692	0.47	0	0.47	94.83	90	93.864
GCA_903920955.1_freshwater_MAG_---_LaPlata_bin-0862_genomic	>90% completeness AND <5% contamination	Genbank	d__Bacteria;p__Chloroflexota;c__Anaerolineae;o__Anaerolineales;f__UBA4823;g__CAIQJJ01;s__CAIQJJ01 sp903872065	935	7653110	0.59061	0.63	0	0.63	94.83	75	90.864
GCA_011055765.1_ASM1105576v1_genomic	>90% completeness AND <5% contamination	Genbank	d__Bacteria;p__Chloroflexota;c__Anaerolineae;o__Anaerolineales;f__UBA4823;g__DSOS01;s__DSOS01 sp011055765	63	4.18052e+06	4.69654	0	0	0	96.24	95	95.992
GCA_011329365.1_ASM1132936v1_genomic	>90% completeness AND <5% contamination	Genbank	d__Bacteria;p__Chloroflexota;c__Anaerolineae;o__Anaerolineales;f__UBA4823;g__DSTM01;s__DSTM01 sp011329365	29	3601340	0	0	0	0	90.6	100	92.48
GCA_003105035.1_ASM310503v1_genomic	>90% completeness AND <5% contamination	Genbank	d__Bacteria;p__Chloroflexota;c__Anaerolineae;o__Anaerolineales;f__UBA4823;g__FEB-25;s__FEB-25 sp003105035	43	4450120	0	0.34	0	0.34	98.28	95	97.624
GCA_012516075.1_ASM1251607v1_genomic	>90% completeness AND <5% contamination	Genbank	d__Bacteria;p__Chloroflexota;c__Anaerolineae;o__Anaerolineales;f__UBA4823;g__JAAYXE01;s__JAAYXE01 sp012516075	199	4864840	2.57953	0.86	0	0.86	98.12	95	97.496
GCA_012798185.1_ASM1279818v1_genomic	>90% completeness AND <5% contamination	Genbank	d__Bacteria;p__Chloroflexota;c__Anaerolineae;o__Anaerolineales;f__UBA4823;g__JAAZNS01;s__JAAZNS01 sp012798185	517	3938040	0.783639	2.59	50	1.295	92.95	80	90.36
GCA_016935755.1_ASM1693575v1_genomic	>90% completeness AND <5% contamination	Genbank	d__Bacteria;p__Chloroflexota;c__Anaerolineae;o__Anaerolineales;f__UBA4823;g__RBG-16-57-11;s__	177	4102830	3.37109	1.72	0	1.72	92.01	85	90.608
1.87252e+06	>90% completeness AND <5% contamination	PATRIC	d__Bacteria;p__Chloroflexota;c__Anaerolineae;o__Anaerolineales;f__UBA4823;g__UBA4823;s__	652	3431740	0.433016	1.72	0	1.72	94.67	85	92.736
GCA_002428565.1_ASM242856v1_genomic	>90% completeness AND <5% contamination	Genbank	d__Bacteria;p__Chloroflexota;c__Anaerolineae;o__Anaerolineales;f__UBA4823;g__UBA6092;s__UBA6092 sp002428565	78	4.14536e+06	3.46122	0	0	0	94.83	90	93.864
3300026278_9	>90% completeness AND <5% contamination	Nayfach et al.	d__Bacteria;p__Chloroflexota;c__Anaerolineae;o__Anaerolineales;f__UBA6092;g__;s__	164	3117630	3.44075	0	0	0	93.1	90	92.48
2.07312e+06	>90% completeness AND <5% contamination	PATRIC	d__Bacteria;p__Chloroflexota;c__Anaerolineae;o__Anaerolineales;f__UBA6663;g__;s__	431	6062750	0	0	0	0	98.28	100	98.624
2.07312e+06	>90% completeness AND <5% contamination	PATRIC	d__Bacteria;p__Chloroflexota;c__Anaerolineae;o__Anaerolineales;f__UBA6663;g__;s__	194	5833990	2.49915	3.45	0	3.45	100	95	99
3300020186_12	>90% completeness AND <5% contamination	Nayfach et al.	d__Bacteria;p__Chloroflexota;c__Anaerolineae;o__Anaerolineales;f__UBA6663;g__;s__	711	5418670	0	2.74	33.33	1.82676	90.2	90	90.16
GCA_016197225.1_ASM1619722v1_genomic	>90% completeness AND <5% contamination	Genbank	d__Bacteria;p__Chloroflexota;c__Anaerolineae;o__Anaerolineales;f__UBA6663;g__;s__	126	4807380	0	0	0	0	100	90	98
GCA_016844645.1_ASM1684464v1_genomic	>90% completeness AND <5% contamination	Genbank	d__Bacteria;p__Chloroflexota;c__Anaerolineae;o__Anaerolineales;f__UBA6663;g__;s__	664	4267150	1.23267	6.9	75	1.725	93.65	85	91.92
GCA_016875735.1_JGI_2017-08-21_genomic	>90% completeness AND <5% contamination	Genbank	d__Bacteria;p__Chloroflexota;c__Anaerolineae;o__Anaerolineales;f__UBA6663;g__;s__	150	4.15089e+06	0	1.72	100	0	100	100	100
GCA_011047095.1_ASM1104709v1_genomic	>90% completeness AND <5% contamination	Genbank	d__Bacteria;p__Chloroflexota;c__Anaerolineae;o__Anaerolineales;f__UBA6663;g__DSNW01;s__DSNW01 sp011047095	28	4643230	0	0	0	0	100	100	100
GCA_016789175.1_ASM1678917v1_genomic	>90% completeness AND <5% contamination	Genbank	d__Bacteria;p__Chloroflexota;c__Anaerolineae;o__Anaerolineales;f__UBA6663;g__UBA6663;s__	460	5632020	0	0	0	0	94.83	85	92.864
2.07312e+06	>90% completeness AND <5% contamination	PATRIC	d__Bacteria;p__Chloroflexota;c__Anaerolineae;o__Anaerolineales;f__UBA6668;g__;s__	500	4694120	0	0	0	0	94.04	80	91.232
GCA_002455215.1_ASM245521v1_genomic	>90% completeness AND <5% contamination	Genbank	d__Bacteria;p__Chloroflexota;c__Anaerolineae;o__Anaerolineales;f__UBA6668;g__UBA6668;s__UBA6668 sp002455215	225	3337140	0	0	0	0	92.01	90	91.608
2.61425e+06	>90% completeness AND <5% contamination	PATRIC	d__Bacteria;p__Chloroflexota;c__Anaerolineae;o__Ardenticatenales;f__Ardenticatenaceae;g__;s__	24	3689300	0	0	0	0	91.22	100	92.976
3300026519_21	>90% completeness AND <5% contamination	Nayfach et al.	d__Bacteria;p__Chloroflexota;c__Anaerolineae;o__Ardenticatenales;f__Ardenticatenaceae;g__;s__	228	3209790	0	0	0	0	94.83	95	94.864
GCA_003520455.1_ASM352045v1_genomic	>90% completeness AND <5% contamination	Genbank	d__Bacteria;p__Chloroflexota;c__Anaerolineae;o__Ardenticatenales;f__Ardenticatenaceae;g__;s__	1104	8172610	0.543033	0.63	0	0.63	90.52	90	90.416
GCA_015491235.1_ASM1549123v1_genomic	>90% completeness AND <5% contamination	Genbank	d__Bacteria;p__Chloroflexota;c__Anaerolineae;o__Ardenticatenales;f__Ardenticatenaceae;g__;s__	414	3820590	0	0	0	0	97.41	95	96.928
GCA_015487975.1_ASM1548797v1_genomic	>90% completeness AND <5% contamination	Genbank	d__Bacteria;p__Chloroflexota;c__Anaerolineae;o__Ardenticatenales;f__Ardenticatenaceae;g__Ardenticatena;s__	116	3499770	0	0	0	0	90.44	95	91.352
GCA_001306175.1_ASM130617v1_genomic	>90% completeness AND <5% contamination	Genbank	d__Bacteria;p__Chloroflexota;c__Anaerolineae;o__Ardenticatenales;f__Ardenticatenaceae;g__Ardenticatena;s__Ardenticatena maritima	12	3559700	0.718038	0	0	0	98.28	95	97.624
GCA_016930605.1_ASM1693060v1_genomic	>90% completeness AND <5% contamination	Genbank	d__Bacteria;p__Chloroflexota;c__Anaerolineae;o__B4-G1;f__B4-G1;g__;s__	715	6115850	0	0	0	0	92.48	90	91.984
GCA_016931785.1_ASM1693178v1_genomic	>90% completeness AND <5% contamination	Genbank	d__Bacteria;p__Chloroflexota;c__Anaerolineae;o__B4-G1;f__B4-G1;g__;s__	481	4810400	0	2.74	0	2.74	92.24	85	90.792
GCA_011192185.1_ASM1119218v1_genomic	>90% completeness AND <5% contamination	Genbank	d__Bacteria;p__Chloroflexota;c__Anaerolineae;o__B4-G1;f__B4-G1;g__B30-G15;s__B30-G15 sp003648085	318	2435240	0	0.16	0	0.16	97.7	80	94.16
GCA_003648075.1_ASM364807v1_genomic	>90% completeness AND <5% contamination	Genbank	d__Bacteria;p__Chloroflexota;c__Anaerolineae;o__B4-G1;f__B4-G1;g__B4-G1;s__B4-G1 sp003648025	954	6528860	3.8607	4.31	33.33	2.87348	96.55	100	97.24
GCA_011192155.1_ASM1119215v1_genomic	>90% completeness AND <5% contamination	Genbank	d__Bacteria;p__Chloroflexota;c__Anaerolineae;o__B4-G1;f__B4-G1;g__B4-G1;s__B4-G1 sp003648025	178	3406240	0	1.72	0	1.72	91.03	90	90.824
GCA_012514315.1_ASM1251431v1_genomic	>90% completeness AND <5% contamination	Genbank	d__Bacteria;p__Chloroflexota;c__Anaerolineae;o__B4-G1;f__B4-G1;g__JAAZAN01;s__JAAZAN01 sp012514315	354	4285330	0	2.59	0	2.59	92.95	95	93.36
GCA_007123205.1_ASM712320v1_genomic	>90% completeness AND <5% contamination	Genbank	d__Bacteria;p__Chloroflexota;c__Anaerolineae;o__B4-G1;f__B4-G1;g__SKLM01;s__SKLM01 sp007123205	454	3226950	0	0	0	0	90.52	90	90.416
GCA_007125045.1_ASM712504v1_genomic	>90% completeness AND <5% contamination	Genbank	d__Bacteria;p__Chloroflexota;c__Anaerolineae;o__B4-G1;f__B4-G1;g__SKLM01;s__SKLM01 sp007123205	488	3663960	0	0.34	100	0	90.52	90	90.416
GCA_007132615.1_ASM713261v1_genomic	>90% completeness AND <5% contamination	Genbank	d__Bacteria;p__Chloroflexota;c__Anaerolineae;o__B4-G1;f__B4-G1;g__SKLM01;s__SKLM01 sp007123205	550	3771560	0	1.72	100	0	91.38	90	91.104
GCA_016926575.1_ASM1692657v1_genomic	>90% completeness AND <5% contamination	Genbank	d__Bacteria;p__Chloroflexota;c__Anaerolineae;o__B4-G1;f__DUEL01;g__;s__	534	3795700	0	1.72	0	1.72	92.76	90	92.208
GCA_016931695.1_ASM1693169v1_genomic	>90% completeness AND <5% contamination	Genbank	d__Bacteria;p__Chloroflexota;c__Anaerolineae;o__B4-G1;f__DUEL01;g__;s__	236	3868920	0	0	0	0	95.69	90	94.552
GCA_011192125.1_ASM1119212v1_genomic	>90% completeness AND <5% contamination	Genbank	d__Bacteria;p__Chloroflexota;c__Anaerolineae;o__B4-G1;f__DUEL01;g__DUEL01;s__DUEL01 sp011192125	165	3374740	0	0	0	0	100	95	99
GCA_014874475.1_ASM1487447v1_genomic	>90% completeness AND <5% contamination	Genbank	d__Bacteria;p__Chloroflexota;c__Anaerolineae;o__B4-G1;f__DUEL01;g__SpSt-77;s__	32	3015130	0	0	0	0	97.41	100	97.928
GCA_011053895.1_ASM1105389v1_genomic	>90% completeness AND <5% contamination	Genbank	d__Bacteria;p__Chloroflexota;c__Anaerolineae;o__B4-G1;f__DUEL01;g__SpSt-77;s__SpSt-77 sp011053895	74	3413360	0	0	0	0	98.28	100	98.624
GCA_014360895.1_ASM1436089v1_genomic	>90% completeness AND <5% contamination	Genbank	d__Bacteria;p__Chloroflexota;c__Anaerolineae;o__B4-G1;f__DUEL01;g__SpSt-77;s__SpSt-77 sp014360895	262	3566240	0	0	0	0	98.28	100	98.624
GCA_016931185.1_ASM1693118v1_genomic	>90% completeness AND <5% contamination	Genbank	d__Bacteria;p__Chloroflexota;c__Anaerolineae;o__B4-G1;f__SLSP01;g__;s__	517	7546490	0	0	0	0	92.24	95	92.792
1.96974e+06	>90% completeness AND <5% contamination	PATRIC	d__Bacteria;p__Chloroflexota;c__Anaerolineae;o__B4-G1;f__SLSP01;g__DSWT01;s__	249	3953150	0	0	0	0	98.28	95	97.624
2.02672e+06	>90% completeness AND <5% contamination	PATRIC	d__Bacteria;p__Chloroflexota;c__Anaerolineae;o__B4-G1;f__SLSP01;g__DSWT01;s__	73	4900930	0	1.72	0	1.72	94.83	95	94.864
2.02672e+06	>90% completeness AND <5% contamination	PATRIC	d__Bacteria;p__Chloroflexota;c__Anaerolineae;o__B4-G1;f__SLSP01;g__DSWT01;s__DSWT01 sp011370065	415	5265090	0	0	0	0	94.83	90	93.864
GCA_011370065.1_ASM1137006v1_genomic	>90% completeness AND <5% contamination	Genbank	d__Bacteria;p__Chloroflexota;c__Anaerolineae;o__B4-G1;f__SLSP01;g__DSWT01;s__DSWT01 sp011370065	85	5697860	0.0319418	1.72	0	1.72	96.55	100	97.24
GCA_015486785.1_ASM1548678v1_genomic	>90% completeness AND <5% contamination	Genbank	d__Bacteria;p__Chloroflexota;c__Anaerolineae;o__B4-G1;f__SLSP01;g__JAAAOZ01;s__	350	2542780	0	6.02	66.67	2.00647	92.24	90	91.792
GCA_003562365.1_ASM356236v1_genomic	>90% completeness AND <5% contamination	Genbank	d__Bacteria;p__Chloroflexota;c__Anaerolineae;o__B4-G1;f__SLSP01;g__PWVB01;s__PWVB01 sp003562365	570	4985780	0.159453	1.72	0	1.72	96.55	85	94.24
GCA_007125545.1_ASM712554v1_genomic	>90% completeness AND <5% contamination	Genbank	d__Bacteria;p__Chloroflexota;c__Anaerolineae;o__B4-G1;f__SLSP01;g__PWVB01;s__PWVB01 sp007125545	642	5242510	0	2.59	0	2.59	96.39	90	95.112
GCA_003562415.1_ASM356241v1_genomic	>90% completeness AND <5% contamination	Genbank	d__Bacteria;p__Chloroflexota;c__Anaerolineae;o__B4-G1;f__SLSP01;g__SLSP01;s__SLSP01 sp007130345	575	4096960	0.638522	1.72	100	0	90.36	90	90.288
3300020153_15	>90% completeness AND <5% contamination	Nayfach et al.	d__Bacteria;p__Chloroflexota;c__Anaerolineae;o__Caldilineales;f__;g__;s__	306	3842920	0	0	0	0	96.39	90	95.112
GCA_015486235.1_ASM1548623v1_genomic	>90% completeness AND <5% contamination	Genbank	d__Bacteria;p__Chloroflexota;c__Anaerolineae;o__Caldilineales;f__;g__;s__	441	3108180	0	5.17	50	2.585	98.12	90	96.496
GCA_002238555.1_ASM223855v1_genomic	>90% completeness AND <5% contamination	Genbank	d__Bacteria;p__Chloroflexota;c__Anaerolineae;o__Caldilineales;f__Bin34;g__Bin34;s__Bin34 sp002238555	111	4630260	0	0	0	0	96.55	100	97.24
GCA_009837115.1_ASM983711v1_genomic	>90% completeness AND <5% contamination	Genbank	d__Bacteria;p__Chloroflexota;c__Anaerolineae;o__Caldilineales;f__Bin34;g__Bin34;s__Bin34 sp009841145	318	3920910	0	1.72	0	1.72	92.6	90	92.08
GCA_009837875.1_ASM983787v1_genomic	>90% completeness AND <5% contamination	Genbank	d__Bacteria;p__Chloroflexota;c__Anaerolineae;o__Caldilineales;f__Bin34;g__Bin34;s__Bin34 sp009841145	169	4207370	0	0	0	0	94.54	95	94.632
GCA_009838685.1_ASM983868v1_genomic	>90% completeness AND <5% contamination	Genbank	d__Bacteria;p__Chloroflexota;c__Anaerolineae;o__Caldilineales;f__Bin34;g__Bin34;s__Bin34 sp009841145	132	4121300	0	0	0	0	98.28	100	98.624
GCA_009839295.1_ASM983929v1_genomic	>90% completeness AND <5% contamination	Genbank	d__Bacteria;p__Chloroflexota;c__Anaerolineae;o__Caldilineales;f__Bin34;g__Bin34;s__Bin34 sp009841145	122	4227760	0	0	0	0	98.28	100	98.624
GCA_009841145.1_ASM984114v1_genomic	>90% completeness AND <5% contamination	Genbank	d__Bacteria;p__Chloroflexota;c__Anaerolineae;o__Caldilineales;f__Bin34;g__Bin34;s__Bin34 sp009841145	102	4342620	0	0	0	0	96.55	100	97.24
2.30606e+06	>90% completeness AND <5% contamination	PATRIC	d__Bacteria;p__Chloroflexota;c__Anaerolineae;o__Caldilineales;f__Bin34;g__Bin34;s__Bin34 sp012271135	159	4046060	0	2.51	0	2.51	91.38	90	91.104
3300026519_14	>90% completeness AND <5% contamination	Nayfach et al.	d__Bacteria;p__Chloroflexota;c__Anaerolineae;o__Caldilineales;f__Caldilineaceae;g__;s__	139	4022160	0.459455	0	0	0	96.39	95	96.112
3300026534_11	>90% completeness AND <5% contamination	Nayfach et al.	d__Bacteria;p__Chloroflexota;c__Anaerolineae;o__Caldilineales;f__Caldilineaceae;g__;s__	614	4344280	0.439889	3.03	100	0	96.39	95	96.112
3300027509_6	>90% completeness AND <5% contamination	Nayfach et al.	d__Bacteria;p__Chloroflexota;c__Anaerolineae;o__Caldilineales;f__Caldilineaceae;g__;s__	564	6664740	1.58761	1.72	0	1.72	91.22	100	92.976
GCA_016713335.1_ASM1671333v1_genomic	>90% completeness AND <5% contamination	Genbank	d__Bacteria;p__Chloroflexota;c__Anaerolineae;o__Caldilineales;f__Caldilineaceae;g__;s__	111	6824980	1.57011	0.16	0	0.16	93.65	100	94.92
GCA_018003515.1_ASM1800351v1_genomic	>90% completeness AND <5% contamination	Genbank	d__Bacteria;p__Chloroflexota;c__Anaerolineae;o__Caldilineales;f__Caldilineaceae;g__;s__	173	5804140	0.951734	1.72	0	1.72	92.95	100	94.36
GCA_019455155.1_ASM1945515v1_genomic	>90% completeness AND <5% contamination	Genbank	d__Bacteria;p__Chloroflexota;c__Anaerolineae;o__Caldilineales;f__Caldilineaceae;g__;s__	780	6854950	0.120205	0	0	0	94.33	75	90.464
GCA_019637685.1_ASM1963768v1_genomic	>90% completeness AND <5% contamination	Genbank	d__Bacteria;p__Chloroflexota;c__Anaerolineae;o__Caldilineales;f__Caldilineaceae;g__;s__	70	6319780	2.50642	0	0	0	98.12	100	98.496
GCA_002238445.1_ASM223844v1_genomic	>90% completeness AND <5% contamination	Genbank	d__Bacteria;p__Chloroflexota;c__Anaerolineae;o__Caldilineales;f__Caldilineaceae;g__Bin5;s__Bin5 sp002238445	120	5553230	2.19746	0	0	0	96.39	100	97.112
GCA_009838625.1_ASM983862v1_genomic	>90% completeness AND <5% contamination	Genbank	d__Bacteria;p__Chloroflexota;c__Anaerolineae;o__Caldilineales;f__Caldilineaceae;g__Bin5;s__Bin5 sp009838625	188	5353610	1.43884	0	0	0	96.39	90	95.112
GCA_009840225.1_ASM984022v1_genomic	>90% completeness AND <5% contamination	Genbank	d__Bacteria;p__Chloroflexota;c__Anaerolineae;o__Caldilineales;f__Caldilineaceae;g__Bin5;s__Bin5 sp009840225	396	5602620	1.16588	0	0	0	97.26	90	95.808
GCA_011523455.1_ASM1152345v1_genomic	>90% completeness AND <5% contamination	Genbank	d__Bacteria;p__Chloroflexota;c__Anaerolineae;o__Caldilineales;f__Caldilineaceae;g__Bin5;s__Bin5 sp009840225	504	5529200	1.78905	0	0	0	93.81	85	92.048
GCA_009837805.1_ASM983780v1_genomic	>90% completeness AND <5% contamination	Genbank	d__Bacteria;p__Chloroflexota;c__Anaerolineae;o__Caldilineales;f__Caldilineaceae;g__Bin5;s__Bin5 sp009841235	387	5028560	1.1904	0.34	0	0.34	90.94	90	90.752
GCA_011523365.1_ASM1152336v1_genomic	>90% completeness AND <5% contamination	Genbank	d__Bacteria;p__Chloroflexota;c__Anaerolineae;o__Caldilineales;f__Caldilineaceae;g__Bin5;s__Bin5 sp011523365	214	5671990	3.26411	0	0	0	99.84	90	97.872
3300017419_4	>90% completeness AND <5% contamination	Nayfach et al.	d__Bacteria;p__Chloroflexota;c__Anaerolineae;o__Caldilineales;f__Caldilineaceae;g__Caldilinea;s__	114	5042810	2.91782	0	0	0	98.12	100	98.496
GCA_016710365.1_ASM1671036v1_genomic	>90% completeness AND <5% contamination	Genbank	d__Bacteria;p__Chloroflexota;c__Anaerolineae;o__Caldilineales;f__Caldilineaceae;g__Caldilinea;s__	68	6608910	3.99098	0	0	0	95.53	90	94.424
GCA_016861025.1_ASM1686102v1_genomic	>90% completeness AND <5% contamination	Genbank	d__Bacteria;p__Chloroflexota;c__Anaerolineae;o__Caldilineales;f__Caldilineaceae;g__Caldilinea;s__	43	6387600	1.19419	1.72	0	1.72	87.77	100	90.216
GCA_018969295.1_ASM1896929v1_genomic	>90% completeness AND <5% contamination	Genbank	d__Bacteria;p__Chloroflexota;c__Anaerolineae;o__Caldilineales;f__Caldilineaceae;g__Caldilinea;s__	151	5046310	0	0	0	0	98.12	90	96.496
GCA_000281175.1_ASM28117v1_genomic	>90% completeness AND <5% contamination	Genbank	d__Bacteria;p__Chloroflexota;c__Anaerolineae;o__Caldilineales;f__Caldilineaceae;g__Caldilinea;s__Caldilinea aerophila	1	5144870	0	0	0	0	99.84	100	99.872
GCA_012842785.1_ASM1284278v1_genomic	>90% completeness AND <5% contamination	Genbank	d__Bacteria;p__Chloroflexota;c__Anaerolineae;o__Caldilineales;f__Caldilineaceae;g__Caldilinea;s__Caldilinea sp002391565	428	6337270	0.0995697	2.59	100	0	98.82	75	94.056
GCA_003451595.1_ASM345159v1_genomic	>90% completeness AND <5% contamination	Genbank	d__Bacteria;p__Chloroflexota;c__Anaerolineae;o__Caldilineales;f__Caldilineaceae;g__Caldilinea;s__Caldilinea sp003451595	135	5720100	2.63946	1.72	0	1.72	92.32	100	93.856
GCA_903904435.1_freshwater_MAG_---_LaPlata-5m-b_bin-022_genomic	>90% completeness AND <5% contamination	Genbank	d__Bacteria;p__Chloroflexota;c__Anaerolineae;o__Caldilineales;f__Caldilineaceae;g__Caldilinea;s__Caldilinea sp903858085	361	4685820	0.39865	0.47	100	0	98.98	85	96.184
GCA_903879975.1_freshwater_MAG_---_LaPlata_bin-1722_genomic	>90% completeness AND <5% contamination	Genbank	d__Bacteria;p__Chloroflexota;c__Anaerolineae;o__Caldilineales;f__Caldilineaceae;g__Caldilinea;s__Caldilinea sp903879975	867	5320690	0.610447	2.23	100	0	97.26	65	90.808
GCA_019637645.1_ASM1963764v1_genomic	>90% completeness AND <5% contamination	Genbank	d__Bacteria;p__Chloroflexota;c__Anaerolineae;o__Caldilineales;f__Caldilineaceae;g__CFX5;s__	156	8212830	0.782191	4.31	0	4.31	99.84	95	98.872
GCA_003577005.1_ASM357700v1_genomic	>90% completeness AND <5% contamination	Genbank	d__Bacteria;p__Chloroflexota;c__Anaerolineae;o__Caldilineales;f__Caldilineaceae;g__CFX5;s__CFX5 sp003577005	847	9366410	0	4.78	0	4.78	96.39	90	95.112
2.61425e+06	>90% completeness AND <5% contamination	PATRIC	d__Bacteria;p__Chloroflexota;c__Anaerolineae;o__Caldilineales;f__Caldilineaceae;g__JAAUPU01;s__	172	5249680	2.65254	3.61	25	2.7075	99.84	95	98.872
2.61425e+06	>90% completeness AND <5% contamination	PATRIC	d__Bacteria;p__Chloroflexota;c__Anaerolineae;o__Caldilineales;f__Caldilineaceae;g__Litorilinea;s__	79	6845390	0.0712889	1.72	100	0	98.12	100	98.496
GCA_003577365.1_ASM357736v1_genomic	>90% completeness AND <5% contamination	Genbank	d__Bacteria;p__Chloroflexota;c__Anaerolineae;o__Caldilineales;f__Caldilineaceae;g__Litorilinea;s__	1075	5419220	0.122527	1.88	50	0.94	92.08	85	90.664
GCA_002148365.1_ASM214836v1_genomic	>90% completeness AND <5% contamination	Genbank	d__Bacteria;p__Chloroflexota;c__Anaerolineae;o__Caldilineales;f__Caldilineaceae;g__Litorilinea;s__Litorilinea aerophila	2496	5812530	0.260128	6.92	57.14	2.96591	92.95	90	92.36
GCA_006569185.2_ASM656918v2_genomic	>90% completeness AND <5% contamination	Genbank	d__Bacteria;p__Chloroflexota;c__Anaerolineae;o__Caldilineales;f__Caldilineaceae;g__Litorilinea;s__Litorilinea aerophila	93	6043010	1.82277	1.72	0	1.72	98.28	85	95.624
GCA_003353825.1_ASM335382v1_genomic	>90% completeness AND <5% contamination	Genbank	d__Bacteria;p__Chloroflexota;c__Anaerolineae;o__Caldilineales;f__J102;g__;s__	1616	7004560	0.0521089	2.82	0	2.82	96.39	70	91.112
GCA_013152585.1_ASM1315258v1_genomic	>90% completeness AND <5% contamination	Genbank	d__Bacteria;p__Chloroflexota;c__Anaerolineae;o__Caldilineales;f__J102;g__JAADGC01;s__JAADGC01 sp013152585	251	3801810	0	0	0	0	94.67	85	92.736
GCA_013151415.1_ASM1315141v1_genomic	>90% completeness AND <5% contamination	Genbank	d__Bacteria;p__Chloroflexota;c__Anaerolineae;o__Caldilineales;f__J102;g__JAADII01;s__JAADII01 sp013151415	197	4520780	0	0	0	0	99.84	95	98.872
2.30606e+06	>90% completeness AND <5% contamination	PATRIC	d__Bacteria;p__Chloroflexota;c__Anaerolineae;o__Caldilineales;f__J102;g__JABWBG01;s__	135	5986060	0.444032	0	0	0	96.39	100	97.112
GCA_015486845.1_ASM1548684v1_genomic	>90% completeness AND <5% contamination	Genbank	d__Bacteria;p__Chloroflexota;c__Anaerolineae;o__Caldilineales;f__JAADDB01;g__;s__	182	3279890	0	0	0	0	99.84	95	98.872
GCA_015486895.1_ASM1548689v1_genomic	>90% completeness AND <5% contamination	Genbank	d__Bacteria;p__Chloroflexota;c__Anaerolineae;o__Caldilineales;f__JAADDB01;g__;s__	532	3420310	0	3.76	0	3.76	89.5	95	90.6
GCA_015490995.1_ASM1549099v1_genomic	>90% completeness AND <5% contamination	Genbank	d__Bacteria;p__Chloroflexota;c__Anaerolineae;o__Caldilineales;f__JAADDB01;g__JAADDB01;s__	150	3040210	0	0	0	0	98.12	95	97.496
GCA_013154135.1_ASM1315413v1_genomic	>90% completeness AND <5% contamination	Genbank	d__Bacteria;p__Chloroflexota;c__Anaerolineae;o__Caldilineales;f__JAADDB01;g__JAADDB01;s__JAADDB01 sp013154135	335	2814580	0	0	0	0	92.95	100	94.36
2.05214e+06	>90% completeness AND <5% contamination	PATRIC	d__Bacteria;p__Chloroflexota;c__Anaerolineae;o__Caldilineales;f__JAAEKA01;g__JAAEKA01;s__	1211	6435130	0.0815834	5.8	14.29	4.97118	92.95	80	90.36
GCA_014879765.1_ASM1487976v1_genomic	>90% completeness AND <5% contamination	Genbank	d__Bacteria;p__Chloroflexota;c__Anaerolineae;o__Caldilineales;f__JAAEKA01;g__JAAEKA01;s__	864	4929700	0	0	0	0	90.36	95	91.288
GCA_016876015.1_JGI_2017-08-21_genomic	>90% completeness AND <5% contamination	Genbank	d__Bacteria;p__Chloroflexota;c__Anaerolineae;o__CG2-30-64-16;f__CG2-30-64-16;g__;s__	533	6531770	0	3.45	33.33	2.30011	98.12	100	98.496
GCA_017882045.1_ASM1788204v1_genomic	>90% completeness AND <5% contamination	Genbank	d__Bacteria;p__Chloroflexota;c__Anaerolineae;o__CG2-30-64-16;f__CG2-30-64-16;g__;s__	462	4845880	0	3.45	0	3.45	96.39	90	95.112
GCA_002842085.1_ASM284208v1_genomic	>90% completeness AND <5% contamination	Genbank	d__Bacteria;p__Chloroflexota;c__Anaerolineae;o__CG2-30-64-16;f__CG2-30-64-16;g__CG2-30-64-16;s__CG2-30-64-16 sp002842085	419	4450830	0.34825	0	0	0	96.55	90	95.24
GCA_002068935.1_ASM206893v1_genomic	>90% completeness AND <5% contamination	Genbank	d__Bacteria;p__Chloroflexota;c__Anaerolineae;o__CG2-30-64-16;f__CG2-30-64-16;g__MWBF01;s__MWBF01 sp002068935	582	3960870	0	3.45	0	3.45	96.24	100	96.992
GCA_016704685.1_ASM1670468v1_genomic	>90% completeness AND <5% contamination	Genbank	d__Bacteria;p__Chloroflexota;c__Anaerolineae;o__CG2-30-64-16;f__SSC4;g__SSC4;s__	84	6250360	0.601085	1.72	100	0	94.36	100	95.488
GCA_016707735.1_ASM1670773v1_genomic	>90% completeness AND <5% contamination	Genbank	d__Bacteria;p__Chloroflexota;c__Anaerolineae;o__CG2-30-64-16;f__SSC4;g__SSC4;s__	114	6404420	0.360064	2.35	100	0	96.39	100	97.112
GCA_016718485.1_ASM1671848v1_genomic	>90% completeness AND <5% contamination	Genbank	d__Bacteria;p__Chloroflexota;c__Anaerolineae;o__CG2-30-64-16;f__SSC4;g__SSC4;s__	82	6190380	1.65612	0	0	0	96.39	100	97.112
GCA_016719785.1_ASM1671978v1_genomic	>90% completeness AND <5% contamination	Genbank	d__Bacteria;p__Chloroflexota;c__Anaerolineae;o__CG2-30-64-16;f__SSC4;g__SSC4;s__	35	6591810	0	0	0	0	94.67	100	95.736
GCA_013693795.1_ASM1369379v1_genomic	>90% completeness AND <5% contamination	Genbank	d__Bacteria;p__Chloroflexota;c__Anaerolineae;o__CG2-30-64-16;f__SSC4;g__SSC4;s__SSC4 sp013693795	1	4686060	0	0	0	0	93.5	95	93.8
GCA_013178015.1_ASM1317801v1_genomic	>90% completeness AND <5% contamination	Genbank	d__Bacteria;p__Chloroflexota;c__Anaerolineae;o__DRVO01;f__DRVO01;g__Ch71;s__Ch71 sp013178015	97	4567050	0	0	0	0	99.84	95	98.872
GCA_011048175.1_ASM1104817v1_genomic	>90% completeness AND <5% contamination	Genbank	d__Bacteria;p__Chloroflexota;c__Anaerolineae;o__DSLN01;f__DSLN01;g__DSLN01;s__DSLN01 sp011048175	62	3662620	0	0.86	0	0.86	98.12	95	97.496
GCA_902812335.1_chloroflexib22_genomic	>90% completeness AND <5% contamination	Genbank	d__Bacteria;p__Chloroflexota;c__Anaerolineae;o__DSLN01;f__DSLN01;g__DSLN01;s__DSLN01 sp902812335	370	3524500	1.65811	0.16	0	0.16	96.39	90	95.112
GCA_014874485.1_ASM1487448v1_genomic	>90% completeness AND <5% contamination	Genbank	d__Bacteria;p__Chloroflexota;c__Anaerolineae;o__DTPP01;f__DTLA01;g__DTLA01;s__	122	3743170	0	3.45	0	3.45	96.55	95	96.24
GCA_014360805.1_ASM1436080v1_genomic	>90% completeness AND <5% contamination	Genbank	d__Bacteria;p__Chloroflexota;c__Anaerolineae;o__DTPP01;f__DTLA01;g__DTLA01;s__DTLA01 sp014360805	154	3238540	0	3.45	0	3.45	96.39	90	95.112
GCA_011334325.1_ASM1133432v1_genomic	>90% completeness AND <5% contamination	Genbank	d__Bacteria;p__Chloroflexota;c__Anaerolineae;o__DTPP01;f__DTPP01;g__DTPP01;s__DTPP01 sp011334325	501	3222890	0	3.45	0	3.45	89.18	100	91.344
GCA_014360855.1_ASM1436085v1_genomic	>90% completeness AND <5% contamination	Genbank	d__Bacteria;p__Chloroflexota;c__Anaerolineae;o__DTPP01;f__JACIWP01;g__JACIWP01;s__JACIWP01 sp014360855	429	3100740	0	2.59	50	1.295	98.12	90	96.496
GCA_021159845.1_ASM2115984v1_genomic	>90% completeness AND <5% contamination	Genbank	d__Bacteria;p__Chloroflexota;c__Anaerolineae;o__DUEN01;f__DUEN01;g__;s__	521	3238120	0.792744	3.45	50	1.725	94.2	75	90.36
GCA_011176545.1_ASM1117654v1_genomic	>90% completeness AND <5% contamination	Genbank	d__Bacteria;p__Chloroflexota;c__Anaerolineae;o__DUEN01;f__DUEN01;g__DUEN01;s__DUEN01 sp011176545	239	4432920	2.56648	1.72	0	1.72	95.53	90	94.424
GCA_013152435.1_ASM1315243v1_genomic	>90% completeness AND <5% contamination	Genbank	d__Bacteria;p__Chloroflexota;c__Anaerolineae;o__DUEN01;f__DUEN01;g__DUEN01;s__DUEN01 sp013152435	149	4973000	2.63925	0	0	0	96.39	95	96.112
GCA_004377365.1_ASM437736v1_genomic	>90% completeness AND <5% contamination	Genbank	d__Bacteria;p__Chloroflexota;c__Anaerolineae;o__E26-bin7;f__E26-bin7;g__E26-bin7;s__E26-bin7 sp004377365	676	5871090	1.2938	2.59	0	2.59	97.1	75	92.68
GCA_016783145.1_ASM1678314v1_genomic	>90% completeness AND <5% contamination	Genbank	d__Bacteria;p__Chloroflexota;c__Anaerolineae;o__E26-bin7;f__JACIWR01;g__;s__	233	4975860	0	0	0	0	90.52	90	90.416
GCA_016875995.1_JGI_2017-08-21_genomic	>90% completeness AND <5% contamination	Genbank	d__Bacteria;p__Chloroflexota;c__Anaerolineae;o__E26-bin7;f__JACIWR01;g__;s__	414	4288290	0	0.86	0	0.86	98.28	100	98.624
GCA_016929775.1_ASM1692977v1_genomic	>90% completeness AND <5% contamination	Genbank	d__Bacteria;p__Chloroflexota;c__Anaerolineae;o__E26-bin7;f__JACIWR01;g__;s__	279	4417290	0	1.72	0	1.72	89.66	95	90.728
GCA_016931365.1_ASM1693136v1_genomic	>90% completeness AND <5% contamination	Genbank	d__Bacteria;p__Chloroflexota;c__Anaerolineae;o__E26-bin7;f__JACIWR01;g__;s__	565	5597730	0	2.19	0	2.19	94.83	90	93.864
GCA_021162125.1_ASM2116212v1_genomic	>90% completeness AND <5% contamination	Genbank	d__Bacteria;p__Chloroflexota;c__Anaerolineae;o__E26-bin7;f__JACIWR01;g__JACIWR01;s__	407	3533990	0.0973404	3.45	50	1.725	96.55	100	97.24
GCA_014360845.1_ASM1436084v1_genomic	>90% completeness AND <5% contamination	Genbank	d__Bacteria;p__Chloroflexota;c__Anaerolineae;o__E26-bin7;f__JACIWR01;g__JACIWR01;s__JACIWR01 sp014360845	578	4362950	0	0	0	0	97.41	95	96.928
2.02672e+06	>90% completeness AND <5% contamination	PATRIC	d__Bacteria;p__Chloroflexota;c__Anaerolineae;o__JAAYEA01;f__JAAYEA01;g__;s__	185	4161710	0	0.31	100	0	92.95	100	94.36
GCA_012689325.1_ASM1268932v1_genomic	>90% completeness AND <5% contamination	Genbank	d__Bacteria;p__Chloroflexota;c__Anaerolineae;o__JAAYEA01;f__JAAYEA01;g__JAAYEA01;s__JAAYEA01 sp012689325	580	5293400	0	1.72	0	1.72	98.12	80	94.496
GCA_016929795.1_ASM1692979v1_genomic	>90% completeness AND <5% contamination	Genbank	d__Bacteria;p__Chloroflexota;c__Anaerolineae;o__JAAYZQ01;f__JAAYZQ01;g__;s__	469	6367540	3.9202	1.88	50	0.94	95.69	70	90.552
GCA_018606645.1_ASM1860664v1_genomic	>90% completeness AND <5% contamination	Genbank	d__Bacteria;p__Chloroflexota;c__Anaerolineae;o__JAAYZQ01;f__JAAYZQ01;g__;s__	32	4268360	0	0	0	0	98.12	100	98.496
2.61425e+06	>90% completeness AND <5% contamination	PATRIC	d__Bacteria;p__Chloroflexota;c__Anaerolineae;o__Promineofilales;f__Promineofilaceae;g__;s__	7	4620580	0	3.45	0	3.45	95.69	95	95.552
2.61425e+06	>90% completeness AND <5% contamination	PATRIC	d__Bacteria;p__Chloroflexota;c__Anaerolineae;o__Promineofilales;f__Promineofilaceae;g__;s__	18	6025540	0.0570903	0	0	0	99.84	100	99.872
GCA_016716885.1_ASM1671688v1_genomic	>90% completeness AND <5% contamination	Genbank	d__Bacteria;p__Chloroflexota;c__Anaerolineae;o__Promineofilales;f__Promineofilaceae;g__;s__	204	7738550	1.25734	3.45	0	3.45	90.88	100	92.704
GCA_018004095.1_ASM1800409v1_genomic	>90% completeness AND <5% contamination	Genbank	d__Bacteria;p__Chloroflexota;c__Anaerolineae;o__Promineofilales;f__Promineofilaceae;g__;s__	187	7840790	1.64562	3.45	0	3.45	96.39	100	97.112
GCA_019637635.1_ASM1963763v1_genomic	>90% completeness AND <5% contamination	Genbank	d__Bacteria;p__Chloroflexota;c__Anaerolineae;o__Promineofilales;f__Promineofilaceae;g__CAADGU01;s__	299	7494400	1.31125	3.45	33.33	2.30011	98.28	100	98.624
GCA_011525915.1_ASM1152591v1_genomic	>90% completeness AND <5% contamination	Genbank	d__Bacteria;p__Chloroflexota;c__Anaerolineae;o__Promineofilales;f__Promineofilaceae;g__CAADGU01;s__CAADGU01 sp011525915	106	7461200	0	1.72	0	1.72	96.55	100	97.24
GCA_015075765.1_ASM1507576v1_genomic	>90% completeness AND <5% contamination	Genbank	d__Bacteria;p__Chloroflexota;c__Anaerolineae;o__Promineofilales;f__Promineofilaceae;g__CAADGU01;s__CAADGU01 sp013112725	3	6842270	0	1.72	0	1.72	94.83	100	95.864
GCA_014584575.1_ASM1458457v1_genomic	>90% completeness AND <5% contamination	Genbank	d__Bacteria;p__Chloroflexota;c__Anaerolineae;o__Promineofilales;f__Promineofilaceae;g__CAADGU01;s__CAADGU01 sp014584575	83	7241710	0.784207	1.72	0	1.72	98.28	100	98.624
GCA_900696625.1_CFX4_genomic	>90% completeness AND <5% contamination	Genbank	d__Bacteria;p__Chloroflexota;c__Anaerolineae;o__Promineofilales;f__Promineofilaceae;g__CAADGU01;s__CAADGU01 sp900696625	641	6949310	0	1.72	0	1.72	94.83	95	94.864
2.05214e+06	>90% completeness AND <5% contamination	PATRIC	d__Bacteria;p__Chloroflexota;c__Anaerolineae;o__Promineofilales;f__Promineofilaceae;g__GCA-2699125;s__	104	7652510	0	1.72	0	1.72	98.28	100	98.624
2.61425e+06	>90% completeness AND <5% contamination	PATRIC	d__Bacteria;p__Chloroflexota;c__Anaerolineae;o__Promineofilales;f__Promineofilaceae;g__GCA-2699125;s__	37	7754920	0.717738	2.59	0	2.59	98.28	100	98.624
2.61425e+06	>90% completeness AND <5% contamination	PATRIC	d__Bacteria;p__Chloroflexota;c__Anaerolineae;o__Promineofilales;f__Promineofilaceae;g__GCA-2699125;s__	4	6630450	0	1.72	0	1.72	98.12	100	98.496
2.61425e+06	>90% completeness AND <5% contamination	PATRIC	d__Bacteria;p__Chloroflexota;c__Anaerolineae;o__Promineofilales;f__Promineofilaceae;g__GCA-2699125;s__	47	6639020	0	1.72	0	1.72	88.79	100	91.032
GCA_016710325.1_ASM1671032v1_genomic	>90% completeness AND <5% contamination	Genbank	d__Bacteria;p__Chloroflexota;c__Anaerolineae;o__Promineofilales;f__Promineofilaceae;g__GCA-2699125;s__	2	8146680	0	0	0	0	96.55	95	96.24
GCA_016713825.1_ASM1671382v1_genomic	>90% completeness AND <5% contamination	Genbank	d__Bacteria;p__Chloroflexota;c__Anaerolineae;o__Promineofilales;f__Promineofilaceae;g__GCA-2699125;s__	12	5432130	0	1.72	0	1.72	89.5	95	90.6
GCA_905479495.1_10_20180412_Bin_Bin_103_1_genomic	>90% completeness AND <5% contamination	Genbank	d__Bacteria;p__Chloroflexota;c__Anaerolineae;o__Promineofilales;f__Promineofilaceae;g__GCA-2699125;s__	52	7282590	0	2.07	0	2.07	96.55	95	96.24
GCA_002699125.1_ASM269912v1_genomic	>90% completeness AND <5% contamination	Genbank	d__Bacteria;p__Chloroflexota;c__Anaerolineae;o__Promineofilales;f__Promineofilaceae;g__GCA-2699125;s__GCA-2699125 sp002699125	188	8054070	0.285322	4.31	0	4.31	96.08	100	96.864
2.61425e+06	>90% completeness AND <5% contamination	PATRIC	d__Bacteria;p__Chloroflexota;c__Anaerolineae;o__Promineofilales;f__Promineofilaceae;g__GCA-2746795;s__	36	6308030	0	3.45	0	3.45	94.67	100	95.736
GCA_014879345.1_ASM1487934v1_genomic	>90% completeness AND <5% contamination	Genbank	d__Bacteria;p__Chloroflexota;c__Anaerolineae;o__Promineofilales;f__Promineofilaceae;g__GCA-2746795;s__	1268	6166770	0	5.17	25	3.8775	91.07	90	90.856
GCA_015486215.1_ASM1548621v1_genomic	>90% completeness AND <5% contamination	Genbank	d__Bacteria;p__Chloroflexota;c__Anaerolineae;o__Promineofilales;f__Promineofilaceae;g__GCA-2746795;s__	341	4.1264e+06	0	1.72	100	0	92.95	100	94.36
GCA_016705235.1_ASM1670523v1_genomic	>90% completeness AND <5% contamination	Genbank	d__Bacteria;p__Chloroflexota;c__Anaerolineae;o__Promineofilales;f__Promineofilaceae;g__GCA-2746795;s__	7	5709220	0	0	0	0	90.36	100	92.288
GCA_016713795.1_ASM1671379v1_genomic	>90% completeness AND <5% contamination	Genbank	d__Bacteria;p__Chloroflexota;c__Anaerolineae;o__Promineofilales;f__Promineofilaceae;g__GCA-2746795;s__	28	7044030	0	1.72	0	1.72	98.12	100	98.496
GCA_016716065.1_ASM1671606v1_genomic	>90% completeness AND <5% contamination	Genbank	d__Bacteria;p__Chloroflexota;c__Anaerolineae;o__Promineofilales;f__Promineofilaceae;g__GCA-2746795;s__	29	6811150	0	0	0	0	98.28	100	98.624
GCA_003696605.1_ASM369660v1_genomic	>90% completeness AND <5% contamination	Genbank	d__Bacteria;p__Chloroflexota;c__Anaerolineae;o__Promineofilales;f__Promineofilaceae;g__J033;s__J033 sp003696605	705	4916560	0	0	0	0	98.12	80	94.496
2.07312e+06	>90% completeness AND <5% contamination	PATRIC	d__Bacteria;p__Chloroflexota;c__Anaerolineae;o__Promineofilales;f__Promineofilaceae;g__JAACFF01;s__	622	5922900	0	0.86	0	0.86	96.39	85	94.112
GCA_009937635.1_ASM993763v1_genomic	>90% completeness AND <5% contamination	Genbank	d__Bacteria;p__Chloroflexota;c__Anaerolineae;o__Promineofilales;f__Promineofilaceae;g__JAACFF01;s__JAACFF01 sp009937635	658	6563290	0	1.72	0	1.72	96.55	95	96.24
GCA_016707605.1_ASM1670760v1_genomic	>90% completeness AND <5% contamination	Genbank	d__Bacteria;p__Chloroflexota;c__Anaerolineae;o__Promineofilales;f__Promineofilaceae;g__Promineofilum;s__	26	5044160	0	3.45	66.67	1.14988	96.55	100	97.24
GCA_019695075.1_ASM1969507v1_genomic	>90% completeness AND <5% contamination	Genbank	d__Bacteria;p__Chloroflexota;c__Anaerolineae;o__Promineofilales;f__Promineofilaceae;g__Promineofilum;s__	645	4615240	0	1.72	0	1.72	94.83	95	94.864
GCA_900066015.1_Cfx-K_genomic	>90% completeness AND <5% contamination	Genbank	d__Bacteria;p__Chloroflexota;c__Anaerolineae;o__Promineofilales;f__Promineofilaceae;g__Promineofilum;s__Promineofilum breve	3	5033970	0	1.72	0	1.72	98.28	100	98.624
GCA_007123775.1_ASM712377v1_genomic	>90% completeness AND <5% contamination	Genbank	d__Bacteria;p__Chloroflexota;c__Anaerolineae;o__Promineofilales;f__Promineofilaceae;g__SLGK01;s__SLGK01 sp007123775	344	5588780	0	6.03	60	2.412	93.97	90	93.176
GCA_016711405.1_ASM1671140v1_genomic	>90% completeness AND <5% contamination	Genbank	d__Bacteria;p__Chloroflexota;c__Anaerolineae;o__Promineofilales;f__Promineofilaceae;g__WTJY01;s__	113	5674440	0	4.31	33.33	2.87348	95.53	100	96.424
GCA_011524645.1_ASM1152464v1_genomic	>90% completeness AND <5% contamination	Genbank	d__Bacteria;p__Chloroflexota;c__Anaerolineae;o__Promineofilales;f__Promineofilaceae;g__WTJY01;s__WTJY01 sp011524645	534	5809360	0	0	0	0	98.28	85	95.624
GCA_002328075.1_ASM232807v1_genomic	>90% completeness AND <5% contamination	Genbank	d__Bacteria;p__Chloroflexota;c__Anaerolineae;o__Promineofilales;f__UBA4811;g__UBA4811;s__UBA4811 sp002328075	62	4656010	0	1.72	0	1.72	96.39	90	95.112
3300027607_19	>90% completeness AND <5% contamination	Nayfach et al.	d__Bacteria;p__Chloroflexota;c__Anaerolineae;o__SBR1031;f__;g__;s__	181	5812090	0	0	0	0	98.12	100	98.496
GCA_016927535.1_ASM1692753v1_genomic	>90% completeness AND <5% contamination	Genbank	d__Bacteria;p__Chloroflexota;c__Anaerolineae;o__SBR1031;f__;g__;s__	425	5102100	0	0.16	100	0	95.92	95	95.736
2.0249e+06	>90% completeness AND <5% contamination	PATRIC	d__Bacteria;p__Chloroflexota;c__Anaerolineae;o__SBR1031;f__A4b;g__;s__	35	4201460	0	0	0	0	91.3	95	92.04
3300013131_17	>90% completeness AND <5% contamination	Nayfach et al.	d__Bacteria;p__Chloroflexota;c__Anaerolineae;o__SBR1031;f__A4b;g__;s__	311	5041110	1.43579	0	0	0	91.38	85	90.104
3300027850_20	>90% completeness AND <5% contamination	Nayfach et al.	d__Bacteria;p__Chloroflexota;c__Anaerolineae;o__SBR1031;f__A4b;g__;s__	351	5459300	0.943344	4.39	87.5	0.54875	96.39	95	96.112
GCA_003696545.1_ASM369654v1_genomic	>90% completeness AND <5% contamination	Genbank	d__Bacteria;p__Chloroflexota;c__Anaerolineae;o__SBR1031;f__A4b;g__;s__	1250	4019040	0.624527	1.72	100	0	94.83	75	90.864
GCA_903843795.1_freshwater_MAG_---_LaPlata-5m-a_bin-127_genomic	>90% completeness AND <5% contamination	Genbank	d__Bacteria;p__Chloroflexota;c__Anaerolineae;o__SBR1031;f__A4b;g__CAIRDJ01;s__CAIRDJ01 sp903877335	663	3102900	1.75126	0.69	0	0.69	92.95	80	90.36
GCA_903860275.1_freshwater_MAG_---_LaPlata-1m-a_bin-558_genomic	>90% completeness AND <5% contamination	Genbank	d__Bacteria;p__Chloroflexota;c__Anaerolineae;o__SBR1031;f__A4b;g__CAIRDJ01;s__CAIRDJ01 sp903877335	530	3187220	1.8502	2.41	33.33	1.60675	97.26	90	95.808
GCA_903867995.1_freshwater_MAG_---_LaPlata-1m-b_bin-804_genomic	>90% completeness AND <5% contamination	Genbank	d__Bacteria;p__Chloroflexota;c__Anaerolineae;o__SBR1031;f__A4b;g__CAIRDJ01;s__CAIRDJ01 sp903877335	584	3183700	1.25137	3.28	50	1.64	96.39	85	94.112
GCA_903877335.1_freshwater_MAG_---_LaPlata-7m-b_bin-240_genomic	>90% completeness AND <5% contamination	Genbank	d__Bacteria;p__Chloroflexota;c__Anaerolineae;o__SBR1031;f__A4b;g__CAIRDJ01;s__CAIRDJ01 sp903877335	500	3189750	2.17352	4.29	60	1.716	93.81	90	93.048
2.05214e+06	>90% completeness AND <5% contamination	PATRIC	d__Bacteria;p__Chloroflexota;c__Anaerolineae;o__SBR1031;f__A4b;g__CFX2;s__	237	7762270	1.92366	0	0	0	100	95	99
GCA_013821665.1_ASM1382166v1_genomic	>90% completeness AND <5% contamination	Genbank	d__Bacteria;p__Chloroflexota;c__Anaerolineae;o__SBR1031;f__A4b;g__CFX2;s__	1025	8126570	1.14612	0.31	50	0.155	95.53	90	94.424
GCA_016124855.1_ASM1612485v1_genomic	>90% completeness AND <5% contamination	Genbank	d__Bacteria;p__Chloroflexota;c__Anaerolineae;o__SBR1031;f__A4b;g__CFX2;s__	84	7093130	4.11046	0.16	100	0	96.55	100	97.24
GCA_016223085.1_ASM1622308v1_genomic	>90% completeness AND <5% contamination	Genbank	d__Bacteria;p__Chloroflexota;c__Anaerolineae;o__SBR1031;f__A4b;g__CFX2;s__	37	6025450	0	0	0	0	99.84	100	99.872
GCA_016788625.1_ASM1678862v1_genomic	>90% completeness AND <5% contamination	Genbank	d__Bacteria;p__Chloroflexota;c__Anaerolineae;o__SBR1031;f__A4b;g__CFX2;s__	744	6638300	0.0819487	0	0	0	100	95	99
GCA_017303635.1_ASM1730363v1_genomic	>90% completeness AND <5% contamination	Genbank	d__Bacteria;p__Chloroflexota;c__Anaerolineae;o__SBR1031;f__A4b;g__CFX2;s__	39	6800110	0	1.72	0	1.72	99.84	100	99.872
GCA_013388735.1_ASM1338873v1_genomic	>90% completeness AND <5% contamination	Genbank	d__Bacteria;p__Chloroflexota;c__Anaerolineae;o__SBR1031;f__A4b;g__CFX2;s__CFX2 sp013388735	190	4271590	3.49121	0	0	0	98.28	95	97.624
GCA_014338005.1_ASM1433800v1_genomic	>90% completeness AND <5% contamination	Genbank	d__Bacteria;p__Chloroflexota;c__Anaerolineae;o__SBR1031;f__A4b;g__CFX2;s__CFX2 sp014338005	214	4824840	3.11264	2.3	50	1.15	100	95	99
GCA_903864435.1_freshwater_MAG_---_Loclat_bin-07687_genomic	>90% completeness AND <5% contamination	Genbank	d__Bacteria;p__Chloroflexota;c__Anaerolineae;o__SBR1031;f__A4b;g__CFX2;s__CFX2 sp903864435	464	5389800	1.8381	1.88	50	0.94	96.55	95	96.24
2.0249e+06	>90% completeness AND <5% contamination	PATRIC	d__Bacteria;p__Chloroflexota;c__Anaerolineae;o__SBR1031;f__A4b;g__GCA-2699585;s__	15	4670330	2.22404	0	0	0	94.36	95	94.488
3300015360_53	>90% completeness AND <5% contamination	Nayfach et al.	d__Bacteria;p__Chloroflexota;c__Anaerolineae;o__SBR1031;f__A4b;g__GCA-2699585;s__	301	3511570	2.46927	1.72	100	0	98.12	100	98.496
3300021341_8	>90% completeness AND <5% contamination	Nayfach et al.	d__Bacteria;p__Chloroflexota;c__Anaerolineae;o__SBR1031;f__A4b;g__GCA-2699585;s__	484	8502790	2.00134	1.72	0	1.72	92.95	100	94.36
GCA_015500095.1_ASM1550009v1_genomic	>90% completeness AND <5% contamination	Genbank	d__Bacteria;p__Chloroflexota;c__Anaerolineae;o__SBR1031;f__A4b;g__GCA-2699585;s__	1	5631890	0	0	0	0	99.84	100	99.872
GCA_002699585.1_ASM269958v1_genomic	>90% completeness AND <5% contamination	Genbank	d__Bacteria;p__Chloroflexota;c__Anaerolineae;o__SBR1031;f__A4b;g__GCA-2699585;s__GCA-2699585 sp002699585	42	6701440	4.10225	0	0	0	99.84	95	98.872
GCA_002702065.1_ASM270206v1_genomic	>90% completeness AND <5% contamination	Genbank	d__Bacteria;p__Chloroflexota;c__Anaerolineae;o__SBR1031;f__A4b;g__GCA-2702065;s__GCA-2702065 sp002702065	14	6768310	0.952971	0.86	0	0.86	100	95	99
3300020201_27	>90% completeness AND <5% contamination	Nayfach et al.	d__Bacteria;p__Chloroflexota;c__Anaerolineae;o__SBR1031;f__A4b;g__GCA-2794515;s__	317	4716080	1.44802	0	0	0	100	95	99
GCA_003695675.1_ASM369567v1_genomic	>90% completeness AND <5% contamination	Genbank	d__Bacteria;p__Chloroflexota;c__Anaerolineae;o__SBR1031;f__A4b;g__GCA-2794595;s__GCA-2794595 sp002794595	421	4696220	0.80256	0	0	0	94.83	100	95.864
GCA_003696565.1_ASM369656v1_genomic	>90% completeness AND <5% contamination	Genbank	d__Bacteria;p__Chloroflexota;c__Anaerolineae;o__SBR1031;f__A4b;g__J038;s__J038 sp003696565	502	4145840	0.676823	1.72	0	1.72	96.55	80	93.24
GCA_007693385.1_ASM769338v1_genomic	>90% completeness AND <5% contamination	Genbank	d__Bacteria;p__Chloroflexota;c__Anaerolineae;o__SBR1031;f__A4b;g__J038;s__J038 sp007693385	137	3587500	3.00209	0	0	0	98.98	90	97.184
3300009084_78	>90% completeness AND <5% contamination	Nayfach et al.	d__Bacteria;p__Chloroflexota;c__Anaerolineae;o__SBR1031;f__A4b;g__OLB13;s__	476	3978420	0.312184	0.16	100	0	92.95	95	93.36
GCA_016712885.1_ASM1671288v1_genomic	>90% completeness AND <5% contamination	Genbank	d__Bacteria;p__Chloroflexota;c__Anaerolineae;o__SBR1031;f__A4b;g__OLB13;s__	39	6159800	0.97974	0	0	0	99.5	100	99.6
GCA_013112675.1_ASM1311267v1_genomic	>90% completeness AND <5% contamination	Genbank	d__Bacteria;p__Chloroflexota;c__Anaerolineae;o__SBR1031;f__A4b;g__OLB13;s__OLB13 sp001567485	3	4282700	0	0	0	0	89.7	95	90.76
2.05214e+06	>90% completeness AND <5% contamination	PATRIC	d__Bacteria;p__Chloroflexota;c__Anaerolineae;o__SBR1031;f__A4b;g__OLB15;s__	88	6349900	4.31456	2.59	0	2.59	100	95	99
3300020192_16	>90% completeness AND <5% contamination	Nayfach et al.	d__Bacteria;p__Chloroflexota;c__Anaerolineae;o__SBR1031;f__A4b;g__OLB15;s__	221	5113390	3.85869	0	0	0	93.42	95	93.736
3300020201_25	>90% completeness AND <5% contamination	Nayfach et al.	d__Bacteria;p__Chloroflexota;c__Anaerolineae;o__SBR1031;f__A4b;g__OLB15;s__	133	4728670	0.450232	0	0	0	100	100	100
3300027823_22	>90% completeness AND <5% contamination	Nayfach et al.	d__Bacteria;p__Chloroflexota;c__Anaerolineae;o__SBR1031;f__A4b;g__OLB15;s__	210	4486690	2.37792	0	0	0	100	95	99
GCA_014879665.1_ASM1487966v1_genomic	>90% completeness AND <5% contamination	Genbank	d__Bacteria;p__Chloroflexota;c__Anaerolineae;o__SBR1031;f__A4b;g__OLB15;s__	269	3850940	3.37528	0.57	100	0	98.12	85	95.496
GCA_014879865.1_ASM1487986v1_genomic	>90% completeness AND <5% contamination	Genbank	d__Bacteria;p__Chloroflexota;c__Anaerolineae;o__SBR1031;f__A4b;g__OLB15;s__	937	6420710	1.70075	0	0	0	94.83	95	94.864
GCA_016713325.1_ASM1671332v1_genomic	>90% completeness AND <5% contamination	Genbank	d__Bacteria;p__Chloroflexota;c__Anaerolineae;o__SBR1031;f__A4b;g__OLB15;s__	107	9033820	1.64869	1.72	100	0	98.98	100	99.184
GCA_016713355.1_ASM1671335v1_genomic	>90% completeness AND <5% contamination	Genbank	d__Bacteria;p__Chloroflexota;c__Anaerolineae;o__SBR1031;f__A4b;g__OLB15;s__	48	8408440	0.16971	3.45	100	0	98.28	100	98.624
GCA_016717205.1_ASM1671720v1_genomic	>90% completeness AND <5% contamination	Genbank	d__Bacteria;p__Chloroflexota;c__Anaerolineae;o__SBR1031;f__A4b;g__OLB15;s__	20	7801840	0.851209	0	0	0	98.28	100	98.624
GCA_016789005.1_ASM1678900v1_genomic	>90% completeness AND <5% contamination	Genbank	d__Bacteria;p__Chloroflexota;c__Anaerolineae;o__SBR1031;f__A4b;g__OLB15;s__	352	5454580	2.87227	0	0	0	94.67	95	94.736
GCA_017304075.1_ASM1730407v1_genomic	>90% completeness AND <5% contamination	Genbank	d__Bacteria;p__Chloroflexota;c__Anaerolineae;o__SBR1031;f__A4b;g__OLB15;s__	706	7109050	1.34955	1.72	100	0	89.66	95	90.728
GCA_001567085.1_ASM156708v1_genomic	>90% completeness AND <5% contamination	Genbank	d__Bacteria;p__Chloroflexota;c__Anaerolineae;o__SBR1031;f__A4b;g__OLB15;s__OLB15 sp001567085	190	3798160	4.20493	0	0	0	91.38	90	91.104
GCA_011047115.1_ASM1104711v1_genomic	>90% completeness AND <5% contamination	Genbank	d__Bacteria;p__Chloroflexota;c__Anaerolineae;o__SBR1031;f__A4b;g__OLB15;s__OLB15 sp011047115	27	5069370	0	0	0	0	98.28	95	97.624
GCA_013360465.1_ASM1336046v1_genomic	>90% completeness AND <5% contamination	Genbank	d__Bacteria;p__Chloroflexota;c__Anaerolineae;o__SBR1031;f__A4b;g__OLB15;s__OLB15 sp013360465	256	5929180	2.54639	0	0	0	99.84	95	98.872
GCA_009840575.1_ASM984057v1_genomic	>90% completeness AND <5% contamination	Genbank	d__Bacteria;p__Chloroflexota;c__Anaerolineae;o__SBR1031;f__A4b;g__UBA6055;s__UBA6055 sp009840575	190	3457750	4.32709	1.72	0	1.72	98.12	100	98.496
GCA_009841405.1_ASM984140v1_genomic	>90% completeness AND <5% contamination	Genbank	d__Bacteria;p__Chloroflexota;c__Anaerolineae;o__SBR1031;f__A4b;g__UBA6055;s__UBA6055 sp009841405	173	4237470	3.84734	0	0	0	94.83	95	94.864
GCA_011523705.1_ASM1152370v1_genomic	>90% completeness AND <5% contamination	Genbank	d__Bacteria;p__Chloroflexota;c__Anaerolineae;o__SBR1031;f__A4b;g__UBA6055;s__UBA6055 sp011523705	246	4705300	2.44533	1.72	100	0	98.28	80	94.624
GCA_011523735.1_ASM1152373v1_genomic	>90% completeness AND <5% contamination	Genbank	d__Bacteria;p__Chloroflexota;c__Anaerolineae;o__SBR1031;f__A4b;g__UBA6055;s__UBA6055 sp011523735	169	4366790	4.47285	0	0	0	96.55	70	91.24
GCA_011525385.1_ASM1152538v1_genomic	>90% completeness AND <5% contamination	Genbank	d__Bacteria;p__Chloroflexota;c__Anaerolineae;o__SBR1031;f__A4b;g__UBA6055;s__UBA6055 sp011525385	131	4913130	4.92883	0	0	0	96.39	95	96.112
2.05214e+06	>90% completeness AND <5% contamination	PATRIC	d__Bacteria;p__Chloroflexota;c__Anaerolineae;o__SBR1031;f__A4b;g__UBA6055;s__UBA6055 sp012270545	290	3968310	1.73374	2.07	50	1.035	96.55	95	96.24
GCA_011523615.1_ASM1152361v1_genomic	>90% completeness AND <5% contamination	Genbank	d__Bacteria;p__Chloroflexota;c__Anaerolineae;o__SBR1031;f__A4b;g__WTGJ01;s__WTGJ01 sp011523615	31	2640450	0	0	0	0	97.41	100	97.928
3300025571_14	>90% completeness AND <5% contamination	Nayfach et al.	d__Bacteria;p__Chloroflexota;c__Anaerolineae;o__SBR1031;f__A4b;g__ZC4RG36;s__ZC4RG36 sp003242205	99	4.18877e+06	0	0.86	100	0	94.83	85	92.864
2.02672e+06	>90% completeness AND <5% contamination	PATRIC	d__Bacteria;p__Chloroflexota;c__Anaerolineae;o__SBR1031;f__Ch27;g__Ch27;s__	109	4.11836e+06	1.41343	1.72	0	1.72	98.28	100	98.624
2.07312e+06	>90% completeness AND <5% contamination	PATRIC	d__Bacteria;p__Chloroflexota;c__Anaerolineae;o__SBR1031;f__J027;g__;s__	2	3884640	0	0	0	0	95.69	85	93.552
2.05214e+06	>90% completeness AND <5% contamination	PATRIC	d__Bacteria;p__Chloroflexota;c__Anaerolineae;o__SBR1031;f__J027;g__CFX10;s__	365	7645330	0	2.59	0	2.59	100	95	99
GCA_016234595.1_ASM1623459v1_genomic	>90% completeness AND <5% contamination	Genbank	d__Bacteria;p__Chloroflexota;c__Anaerolineae;o__SBR1031;f__J027;g__CFX10;s__	59	5224820	0	0	0	0	96.55	95	96.24
GCA_016860965.1_ASM1686096v1_genomic	>90% completeness AND <5% contamination	Genbank	d__Bacteria;p__Chloroflexota;c__Anaerolineae;o__SBR1031;f__J027;g__CFX10;s__CFX10 sp013112715	45	6266450	0.0352672	0	0	0	96.55	100	97.24
GCA_003697365.1_ASM369736v1_genomic	>90% completeness AND <5% contamination	Genbank	d__Bacteria;p__Chloroflexota;c__Anaerolineae;o__SBR1031;f__J027;g__J027;s__J027 sp003697365	220	3118080	0	0	0	0	96.55	90	95.24
GCA_010092845.1_ASM1009284v1_genomic	>90% completeness AND <5% contamination	Genbank	d__Bacteria;p__Chloroflexota;c__Anaerolineae;o__SBR1031;f__J027;g__J027;s__J027 sp010092845	312	3856940	0	0	0	0	100	95	99
1.87252e+06	>90% completeness AND <5% contamination	PATRIC	d__Bacteria;p__Chloroflexota;c__Anaerolineae;o__SBR1031;f__UBA2029;g__;s__	590	4.09618e+06	2.94347	1.88	50	0.94	93.1	80	90.48
3300010271_5	>90% completeness AND <5% contamination	Nayfach et al.	d__Bacteria;p__Chloroflexota;c__Anaerolineae;o__SBR1031;f__UBA2029;g__;s__	361	4350400	0	3.45	0	3.45	94.83	95	94.864
GCA_012729765.1_ASM1272976v1_genomic	>90% completeness AND <5% contamination	Genbank	d__Bacteria;p__Chloroflexota;c__Anaerolineae;o__SBR1031;f__UBA2029;g__JAAYCM01;s__JAAYCM01 sp012729765	154	4747920	3.27238	1.72	100	0	92.95	80	90.36
GCA_003569045.1_Grel_assembly01_genomic	>90% completeness AND <5% contamination	Genbank	d__Bacteria;p__Chloroflexota;c__Anaerolineae;o__SBR1031;f__UBA2029;g__MO-CFX2;s__MO-CFX2 sp003569045	5	6202560	0	0	0	0	100	100	100
GCA_018432315.1_LM3_genomic	>90% completeness AND <5% contamination	Genbank	d__Bacteria;p__Chloroflexota;c__Anaerolineae;o__SBR1031;f__UBA2029;g__TC-15;s__	66	5691110	4.74336	0	0	0	99.84	80	95.872
1.96974e+06	>90% completeness AND <5% contamination	PATRIC	d__Bacteria;p__Chloroflexota;c__Anaerolineae;o__SBR1031;f__UBA2029;g__UBA2029;s__	378	3824190	2.29931	0.16	0	0.16	94.83	85	92.864
3300011965_1	>90% completeness AND <5% contamination	Nayfach et al.	d__Bacteria;p__Chloroflexota;c__Anaerolineae;o__SBR1031;f__UBA2029;g__UBA2029;s__UBA2029 sp002332795	307	4321600	2.1897	0	0	0	93.1	100	94.48
3300015202_3	>90% completeness AND <5% contamination	Nayfach et al.	d__Bacteria;p__Chloroflexota;c__Anaerolineae;o__SBR1031;f__UBA2796;g__;s__	376	6182080	0	0.16	100	0	98.28	100	98.624
GCA_019637555.1_ASM1963755v1_genomic	>90% completeness AND <5% contamination	Genbank	d__Bacteria;p__Chloroflexota;c__Anaerolineae;o__SBR1031;f__UBA2796;g__;s__	116	6497090	0	0	0	0	95.92	100	96.736
GCA_019637615.1_ASM1963761v1_genomic	>90% completeness AND <5% contamination	Genbank	d__Bacteria;p__Chloroflexota;c__Anaerolineae;o__SBR1031;f__UBA2796;g__;s__	76	8.2108e+06	0	1.72	0	1.72	94.48	100	95.584
GCA_017743585.1_ASM1774358v1_genomic	>90% completeness AND <5% contamination	Genbank	d__Bacteria;p__Chloroflexota;c__Anaerolineae;o__SBR1031;f__UBA2796;g__CP2-2F;s__	320	2628800	0	0	0	0	91.38	95	92.104
GCA_003695215.1_ASM369521v1_genomic	>90% completeness AND <5% contamination	Genbank	d__Bacteria;p__Chloroflexota;c__Anaerolineae;o__SBR1031;f__UBA2796;g__CP2-2F;s__CP2-2F sp003695215	339	3198080	0	0	0	0	91.38	95	92.104
2.05214e+06	>90% completeness AND <5% contamination	PATRIC	d__Bacteria;p__Chloroflexota;c__Anaerolineae;o__SBR1031;f__UBA2796;g__UBA2796;s__	173	5291250	0	0	0	0	99.14	100	99.312
GCA_014879835.1_ASM1487983v1_genomic	>90% completeness AND <5% contamination	Genbank	d__Bacteria;p__Chloroflexota;c__Anaerolineae;o__SBR1031;f__UBA2796;g__UBA2796;s__	352	5336420	0	0	0	0	94.91	95	94.928
GCA_015075625.1_ASM1507562v1_genomic	>90% completeness AND <5% contamination	Genbank	d__Bacteria;p__Chloroflexota;c__Anaerolineae;o__SBR1031;f__UBA2796;g__UBA2796;s__UBA2796 sp002352035	5	4684270	0	0	0	0	100	100	100
GCA_016928235.1_ASM1692823v1_genomic	>90% completeness AND <5% contamination	Genbank	d__Bacteria;p__Chloroflexota;c__Anaerolineae;o__SBR1031;f__UBA3940;g__DRKO01;s__	372	5350260	0	0	0	0	94.83	90	93.864
GCA_011051745.1_ASM1105174v1_genomic	>90% completeness AND <5% contamination	Genbank	d__Bacteria;p__Chloroflexota;c__Anaerolineae;o__SBR1031;f__UBA3940;g__DRKO01;s__DRKO01 sp011051745	502	3408850	0	1.88	50	0.94	89.18	95	90.344
GCA_010092885.1_ASM1009288v1_genomic	>90% completeness AND <5% contamination	Genbank	d__Bacteria;p__Chloroflexota;c__Anaerolineae;o__SBR1031;f__UBA3940;g__TC-195;s__TC-195 sp010092885	431	4058950	0	0	0	0	98.28	95	97.624
GCA_010092775.1_ASM1009277v1_genomic	>90% completeness AND <5% contamination	Genbank	d__Bacteria;p__Chloroflexota;c__Anaerolineae;o__SBR1031;f__UBA3940;g__TC-71;s__TC-71 sp010092775	576	4057650	0	1.02	0	1.02	90.75	90	90.6
GCA_016926255.1_ASM1692625v1_genomic	>90% completeness AND <5% contamination	Genbank	d__Bacteria;p__Chloroflexota;c__Anaerolineae;o__SBR1031;f__UBA3940;g__UBA3940;s__	82	4611460	0	0	0	0	98.28	95	97.624
1.87252e+06	>90% completeness AND <5% contamination	PATRIC	d__Bacteria;p__Chloroflexota;c__Anaerolineae;o__SpSt-313;f__SpSt-313;g__SpSt-313;s__	570	4579180	0	1.72	0	1.72	98.12	80	94.496
3300012956_49	>90% completeness AND <5% contamination	Nayfach et al.	d__Bacteria;p__Chloroflexota;c__Anaerolineae;o__Thermoflexales;f__;g__;s__	341	3402230	0	1.72	0	1.72	92.95	95	93.36
GCA_017882055.1_ASM1788205v1_genomic	>90% completeness AND <5% contamination	Genbank	d__Bacteria;p__Chloroflexota;c__Anaerolineae;o__Thermoflexales;f__Fen-1058;g__Fen-1058;s__	495	3756090	0	0	0	0	94.67	95	94.736
GCA_003154115.1_20120700_E3M_genomic	>90% completeness AND <5% contamination	Genbank	d__Bacteria;p__Chloroflexota;c__Anaerolineae;o__Thermoflexales;f__Fen-1058;g__Fen-1058;s__Fen-1058 sp003154115	460	7698000	1.05014	1.72	0	1.72	95.53	90	94.424
GCA_016714465.1_ASM1671446v1_genomic	>90% completeness AND <5% contamination	Genbank	d__Bacteria;p__Chloroflexota;c__Anaerolineae;o__Thermoflexales;f__J036;g__;s__	28	4628330	0	0	0	0	92.32	100	93.856
GCA_016841965.1_ASM1684196v1_genomic	>90% completeness AND <5% contamination	Genbank	d__Bacteria;p__Chloroflexota;c__Anaerolineae;o__Thermoflexales;f__J036;g__;s__	59	3855810	0	0	0	0	98.12	95	97.496
GCA_018969115.1_ASM1896911v1_genomic	>90% completeness AND <5% contamination	Genbank	d__Bacteria;p__Chloroflexota;c__Anaerolineae;o__Thermoflexales;f__J036;g__;s__	472	4613850	0	1.72	0	1.72	98.12	80	94.496
GCA_019694215.1_ASM1969421v1_genomic	>90% completeness AND <5% contamination	Genbank	d__Bacteria;p__Chloroflexota;c__Anaerolineae;o__Thermoflexales;f__J036;g__;s__	184	3403820	0	0	0	0	94.67	100	95.736
GCA_011373615.1_ASM1137361v1_genomic	>90% completeness AND <5% contamination	Genbank	d__Bacteria;p__Chloroflexota;c__Anaerolineae;o__Thermoflexales;f__J036;g__DRWP01;s__DRWP01 sp011373615	272	2176850	0	0	0	0	92.48	100	93.984
GCA_017743375.1_ASM1774337v1_genomic	>90% completeness AND <5% contamination	Genbank	d__Bacteria;p__Chloroflexota;c__Anaerolineae;o__Thermoflexales;f__J036;g__Roseilinea;s__	294	2845800	0	1.72	0	1.72	93.68	95	93.944
GCA_016842085.1_ASM1684208v1_genomic	>90% completeness AND <5% contamination	Genbank	d__Bacteria;p__Chloroflexota;c__Anaerolineae;o__Thermoflexales;f__Thermoflexaceae;g__Thermoflexus;s__	100	3891020	0	1.72	100	0	98.28	90	96.624
3300005255_2	>90% completeness AND <5% contamination	Nayfach et al.	d__Bacteria;p__Chloroflexota;c__Anaerolineae;o__Thermoflexales;f__Thermoflexaceae;g__Thermoflexus;s__Thermoflexus hugenholtzii	117	3335790	0	0	0	0	100	100	100
3300005858_3	>90% completeness AND <5% contamination	Nayfach et al.	d__Bacteria;p__Chloroflexota;c__Anaerolineae;o__Thermoflexales;f__Thermoflexaceae;g__Thermoflexus;s__Thermoflexus hugenholtzii	174	3176830	0	0	0	0	93.1	100	94.48
3300005966_2	>90% completeness AND <5% contamination	Nayfach et al.	d__Bacteria;p__Chloroflexota;c__Anaerolineae;o__Thermoflexales;f__Thermoflexaceae;g__Thermoflexus;s__Thermoflexus hugenholtzii	231	3223970	0	0	0	0	96.55	100	97.24
3300020145_2	>90% completeness AND <5% contamination	Nayfach et al.	d__Bacteria;p__Chloroflexota;c__Anaerolineae;o__Thermoflexales;f__Thermoflexaceae;g__Thermoflexus;s__Thermoflexus hugenholtzii	355	3896980	0	1.72	100	0	92.95	95	93.36
GCA_018771565.1_ASM1877156v1_genomic	>90% completeness AND <5% contamination	Genbank	d__Bacteria;p__Chloroflexota;c__Anaerolineae;o__Thermoflexales;f__Thermoflexaceae;g__Thermoflexus;s__Thermoflexus hugenholtzii	1	3316680	0	0	0	0	100	100	100
GCA_900187885.1_IMG-taxon_2140918011_annotated_assembly_genomic	>90% completeness AND <5% contamination	Genbank	d__Bacteria;p__Chloroflexota;c__Anaerolineae;o__Thermoflexales;f__Thermoflexaceae;g__Thermoflexus;s__Thermoflexus hugenholtzii	78	3216960	0	0	0	0	100	90	98
GCA_002898735.1_ASM289873v1_genomic	>90% completeness AND <5% contamination	Genbank	d__Bacteria;p__Chloroflexota;c__Anaerolineae;o__Thermoflexales;f__Thermoflexaceae;g__Thermoflexus;s__Thermoflexus sp002898735	175	2931250	0	0.34	100	0	94.83	95	94.864
GCA_011048055.1_ASM1104805v1_genomic	>90% completeness AND <5% contamination	Genbank	d__Bacteria;p__Chloroflexota;c__Anaerolineae;o__Thermoflexales;f__Thermoflexaceae;g__Thermoflexus;s__Thermoflexus sp011048055	41	3184360	0	0	0	0	98.28	100	98.624
GCA_016842025.1_ASM1684202v1_genomic	>90% completeness AND <5% contamination	Genbank	d__Bacteria;p__Chloroflexota;c__Anaerolineae;o__Thermoflexales;f__Thermoflexaceae;g__Thermoflexus;s__Thermoflexus sp011373175	423	2981560	0	1.88	100	0	91.38	95	92.104
GCA_016842045.1_ASM1684204v1_genomic	>90% completeness AND <5% contamination	Genbank	d__Bacteria;p__Chloroflexota;c__Anaerolineae;o__Thermoflexales;f__Thermoflexaceae;g__Thermoflexus;s__Thermoflexus sp011373175	212	3444750	0	0	0	0	98.28	95	97.624
2.02672e+06	>90% completeness AND <5% contamination	PATRIC	d__Bacteria;p__Chloroflexota;c__Anaerolineae;o__UBA1429;f__UBA1429;g__;s__	47	2762280	0	5.17	50	2.585	98.28	95	97.624
3300009773_24	>90% completeness AND <5% contamination	Nayfach et al.	d__Bacteria;p__Chloroflexota;c__Anaerolineae;o__UBA1429;f__UBA1429;g__;s__	204	2750910	0	1.88	50	0.94	94.83	95	94.864
GCA_021162655.1_ASM2116265v1_genomic	>90% completeness AND <5% contamination	Genbank	d__Bacteria;p__Chloroflexota;c__Anaerolineae;o__UBA1429;f__UBA1429;g__;s__	322	3109260	0	0	0	0	96.39	95	96.112
GCA_012729455.1_ASM1272945v1_genomic	>90% completeness AND <5% contamination	Genbank	d__Bacteria;p__Chloroflexota;c__Anaerolineae;o__UBA1429;f__UBA1429;g__JAAYDC01;s__JAAYDC01 sp012729455	30	2638350	0	0	0	0	94.83	85	92.864
GCA_012719135.1_ASM1271913v1_genomic	>90% completeness AND <5% contamination	Genbank	d__Bacteria;p__Chloroflexota;c__Anaerolineae;o__UBA1429;f__UBA1429;g__JAAYED01;s__JAAYED01 sp012719135	101	2642640	0	3.45	50	1.725	98.28	85	95.624
GCA_014360745.1_ASM1436074v1_genomic	>90% completeness AND <5% contamination	Genbank	d__Bacteria;p__Chloroflexota;c__Anaerolineae;o__UBA1429;f__UBA1429;g__SKLG01;s__	1103	4429970	0.228444	5.96	33.33	3.97353	98.28	75	93.624
GCA_002329325.1_ASM232932v1_genomic	>90% completeness AND <5% contamination	Genbank	d__Bacteria;p__Chloroflexota;c__Anaerolineae;o__UBA1429;f__UBA1429;g__UBA1429;s__UBA1429 sp002329325	95	3282820	0	3.61	0	3.61	93.86	90	93.088
GCA_007132185.1_ASM713218v1_genomic	>90% completeness AND <5% contamination	Genbank	d__Bacteria;p__Chloroflexota;c__Anaerolineae;o__UBA1429;f__UBA1429;g__UBA1429;s__UBA1429 sp007132185	246	3387590	0	1.88	0	1.88	98.28	95	97.624
GCA_014360825.1_ASM1436082v1_genomic	>90% completeness AND <5% contamination	Genbank	d__Bacteria;p__Chloroflexota;c__Anaerolineae;o__UBA2200;f__JACIWT01;g__JACIWT01;s__JACIWT01 sp014360825	64	2885680	0	0	0	0	95.53	100	96.424
GCA_014360755.1_ASM1436075v1_genomic	>90% completeness AND <5% contamination	Genbank	d__Bacteria;p__Chloroflexota;c__Anaerolineae;o__UBA2200;f__UBA2200;g__JACIWX01;s__JACIWX01 sp014360755	23	2982420	0	1.72	0	1.72	96.39	95	96.112
GCA_014360905.1_ASM1436090v1_genomic	>90% completeness AND <5% contamination	Genbank	d__Bacteria;p__Chloroflexota;c__Anaerolineae;o__UBA2200;f__UBA2200;g__JACIWX01;s__JACIWX01 sp014360905	49	2833120	0	1.72	0	1.72	94.83	100	95.864
GCA_002070215.1_ASM207021v1_genomic	>90% completeness AND <5% contamination	Genbank	d__Bacteria;p__Chloroflexota;c__Anaerolineae;o__UBA2200;f__UBA2200;g__UBA2200;s__UBA2200 sp002070215	170	3130790	0	1.72	0	1.72	96.39	100	97.112
3300026516_16	>90% completeness AND <5% contamination	Nayfach et al.	d__Bacteria;p__Chloroflexota;c__Anaerolineae;o__UBA3071;f__;g__;s__	476	5989780	0	3.45	100	0	92.08	95	92.664
3300013137_12	>90% completeness AND <5% contamination	Nayfach et al.	d__Bacteria;p__Chloroflexota;c__Anaerolineae;o__UBA3071;f__CG2-30-64-16;g__;s__	399	6800090	0	1.72	0	1.72	92.95	95	93.36
GCA_014383605.1_ASM1438360v1_genomic	>90% completeness AND <5% contamination	Genbank	d__Bacteria;p__Chloroflexota;c__Anaerolineae;o__UBA3071;f__UBA3071;g__NIOZ-UU15;s__NIOZ-UU15 sp014383605	640	4899360	0	1.72	0	1.72	87.77	100	90.216
3300014149_7	>90% completeness AND <5% contamination	Nayfach et al.	d__Bacteria;p__Chloroflexota;c__Anaerolineae;o__UBA4142;f__;g__;s__	367	3541390	0	0.16	100	0	97.26	95	96.808
GCA_016235055.1_ASM1623505v1_genomic	>90% completeness AND <5% contamination	Genbank	d__Bacteria;p__Chloroflexota;c__Anaerolineae;o__UBA4142;f__;g__;s__	102	5220650	0	0	0	0	98.28	95	97.624
2.05214e+06	>90% completeness AND <5% contamination	PATRIC	d__Bacteria;p__Chloroflexota;c__Anaerolineae;o__UBA4142;f__SHND01;g__SHND01;s__	144	5815930	0	0	0	0	93.1	95	93.48
GCA_002050085.1_ASM205008v1_genomic	>90% completeness AND <5% contamination	Genbank	d__Bacteria;p__Chloroflexota;c__Anaerolineae;o__UBA4142;f__SHND01;g__SHND01;s__	672	4654270	0	4.47	83.33	0.745149	90.13	90	90.104
GCA_016209205.1_ASM1620920v1_genomic	>90% completeness AND <5% contamination	Genbank	d__Bacteria;p__Chloroflexota;c__Anaerolineae;o__UBA4142;f__SHND01;g__SHND01;s__	279	6382990	1.1703	0.86	0	0.86	89.66	100	91.728
GCA_004295045.1_ASM429504v1_genomic	>90% completeness AND <5% contamination	Genbank	d__Bacteria;p__Chloroflexota;c__Anaerolineae;o__UBA4142;f__SHND01;g__SHND01;s__SHND01 sp004295045	80	4951630	0	0	0	0	94.83	90	93.864
3300005529_35	>90% completeness AND <5% contamination	Nayfach et al.	d__Bacteria;p__Chloroflexota;c__Anaerolineae;o__UBA4142;f__UBA4142;g__;s__	161	5488080	0	0	0	0	96.55	95	96.24
3300021604_7	>90% completeness AND <5% contamination	Nayfach et al.	d__Bacteria;p__Chloroflexota;c__Anaerolineae;o__UBA4142;f__UBA4142;g__;s__	321	4537310	0	0	0	0	94.83	95	94.864
3300027515_21	>90% completeness AND <5% contamination	Nayfach et al.	d__Bacteria;p__Chloroflexota;c__Anaerolineae;o__UBA4142;f__UBA4142;g__;s__	258	3119390	0	0	0	0	91.8	85	90.44
GCA_016208315.1_ASM1620831v1_genomic	>90% completeness AND <5% contamination	Genbank	d__Bacteria;p__Chloroflexota;c__Anaerolineae;o__UBA4142;f__UBA4142;g__;s__	210	6255750	1.21057	2.51	33.33	1.67342	93.1	95	93.48
GCA_016223105.1_ASM1622310v1_genomic	>90% completeness AND <5% contamination	Genbank	d__Bacteria;p__Chloroflexota;c__Anaerolineae;o__UBA4142;f__UBA4142;g__;s__	250	5516350	0	0.78	40	0.468	98.12	95	97.496
2.80296e+06	>90% completeness AND <5% contamination	PATRIC	d__Bacteria;p__Chloroflexota;c__Anaerolineae;o__UBA4142;f__UBA4142;g__CAIKBD01;s__	132	6339430	0.152537	5.96	25	4.47	100	95	99
GCA_903825565.1_freshwater_MAG_---_LaPlata-a_bin-0606_genomic	>90% completeness AND <5% contamination	Genbank	d__Bacteria;p__Chloroflexota;c__Anaerolineae;o__UBA4142;f__UBA4142;g__CAIKBD01;s__CAIKBD01 sp903825565	530	6370770	0	3.76	60	1.504	99.84	90	97.872
3300020222_28	>90% completeness AND <5% contamination	Nayfach et al.	d__Bacteria;p__Chloroflexota;c__Anaerolineae;o__UBA4142;f__UBA4142;g__UBA4142;s__	279	4442800	0	4.08	16.67	3.39986	94.83	85	92.864
GCA_016215025.1_ASM1621502v1_genomic	>90% completeness AND <5% contamination	Genbank	d__Bacteria;p__Chloroflexota;c__Anaerolineae;o__UBA4142;f__UBA4142;g__UBA4142;s__	194	7742820	1.53019	2.51	16.67	2.09158	96.55	100	97.24
3300014686_1	>90% completeness AND <5% contamination	Nayfach et al.	d__Bacteria;p__Chloroflexota;c__Anaerolineae;o__UBA4142;f__UBA4142;g__UBA4142;s__UBA4142 sp002400365	218	4603550	0	3.76	0	3.76	100	100	100
3300028299_8	>90% completeness AND <5% contamination	Nayfach et al.	d__Bacteria;p__Chloroflexota;c__Anaerolineae;o__UBA7937;f__;g__;s__	310	4655850	0.686448	2.59	50	1.295	88.79	100	91.032
GCA_005223035.1_ASM522303v1_genomic	>90% completeness AND <5% contamination	Genbank	d__Bacteria;p__Chloroflexota;c__Anaerolineae;o__UBA7937;f__B3-Chlor;g__B3-Chlor;s__B3-Chlor sp005223035	73	2817310	0	0.16	0	0.16	94.67	95	94.736
3300024353_34	>90% completeness AND <5% contamination	Nayfach et al.	d__Bacteria;p__Chloroflexota;c__Anaerolineae;o__UBA7937;f__UBA7937;g__UBA7937;s__	16	2568740	0	3.45	33.33	2.30011	98.28	95	97.624
3300027742_28	>90% completeness AND <5% contamination	Nayfach et al.	d__Bacteria;p__Chloroflexota;c__Anaerolineae;o__UBA7937;f__UBA7937;g__UBA7937;s__UBA7937 sp002366595	70	2296380	0	0.86	0	0.86	100	100	100
2.61425e+06	>90% completeness AND <5% contamination	PATRIC	d__Bacteria;p__Chloroflexota;c__Anaerolineae;o__UCB3;f__UCB3;g__;s__	76	4271970	0	0.86	0	0.86	97.41	80	93.928
GCA_016703025.1_ASM1670302v1_genomic	>90% completeness AND <5% contamination	Genbank	d__Bacteria;p__Chloroflexota;c__Anaerolineae;o__UCB3;f__UCB3;g__;s__	5	4347430	0	0.86	0	0.86	95.69	100	96.552
GCA_016709185.1_ASM1670918v1_genomic	>90% completeness AND <5% contamination	Genbank	d__Bacteria;p__Chloroflexota;c__Anaerolineae;o__UCB3;f__UCB3;g__;s__	9	4929940	0	0	0	0	96.39	100	97.112
GCA_016710785.1_ASM1671078v1_genomic	>90% completeness AND <5% contamination	Genbank	d__Bacteria;p__Chloroflexota;c__Anaerolineae;o__UCB3;f__UCB3;g__;s__	13	4924100	0	0	0	0	98.12	100	98.496
2.02672e+06	>90% completeness AND <5% contamination	PATRIC	d__Bacteria;p__Chloroflexota;c__Chloroflexia;o__;f__;g__;s__	304	5249350	4.92061	3.92	0	3.92	93.62	100	94.896
3300017426_18	>90% completeness AND <5% contamination	Nayfach et al.	d__Bacteria;p__Chloroflexota;c__Chloroflexia;o__;f__;g__;s__	230	4876170	2.45521	3.45	0	3.45	99.14	95	98.312
3300018910_6	>90% completeness AND <5% contamination	Nayfach et al.	d__Bacteria;p__Chloroflexota;c__Chloroflexia;o__54-19;f__;g__;s__	33	4859180	1.09813	0.69	0	0.69	98.12	100	98.496
GCA_015478675.1_ASM1547867v1_genomic	>90% completeness AND <5% contamination	Genbank	d__Bacteria;p__Chloroflexota;c__Chloroflexia;o__54-19;f__;g__;s__	425	4367760	0	2.41	33.33	1.60675	96.63	95	96.304
3300017509_5	>90% completeness AND <5% contamination	Nayfach et al.	d__Bacteria;p__Chloroflexota;c__Chloroflexia;o__54-19;f__54-19;g__;s__	551	7545330	0.569624	5.33	100	0	94.83	100	95.864
GCA_017307685.1_ASM1730768v1_genomic	>90% completeness AND <5% contamination	Genbank	d__Bacteria;p__Chloroflexota;c__Chloroflexia;o__54-19;f__54-19;g__54-19;s__54-19 sp001898225	91	8956370	0.0138449	0.31	50	0.155	99.84	100	99.872
GCA_902812345.1_chloroflexib14_genomic	>90% completeness AND <5% contamination	Genbank	d__Bacteria;p__Chloroflexota;c__Chloroflexia;o__54-19;f__54-19;g__54-19;s__54-19 sp902812345	674	6722970	0.503646	0	0	0	100	100	100
GCA_013390945.1_ASM1339094v1_genomic	>90% completeness AND <5% contamination	Genbank	d__Bacteria;p__Chloroflexota;c__Chloroflexia;o__54-19;f__54-19;g__L227-5C;s__L227-5C sp013390945	564	6352490	0.0347895	0	0	0	98.28	100	98.624
GCA_013390565.1_ASM1339056v1_genomic	>90% completeness AND <5% contamination	Genbank	d__Bacteria;p__Chloroflexota;c__Chloroflexia;o__54-19;f__54-19;g__L227-S17;s__L227-S17 sp013390565	36	6014220	0	0	0	0	98.28	95	97.624
3300017480_17	>90% completeness AND <5% contamination	Nayfach et al.	d__Bacteria;p__Chloroflexota;c__Chloroflexia;o__54-19;f__QHBQ01;g__;s__	385	4481320	0	0.69	0	0.69	96.39	100	97.112
3300005286_12	>90% completeness AND <5% contamination	Nayfach et al.	d__Bacteria;p__Chloroflexota;c__Chloroflexia;o__Chloroflexales;f__;g__;s__	48	6547820	0	1.72	0	1.72	97.41	90	95.928
3300012044_7	>90% completeness AND <5% contamination	Nayfach et al.	d__Bacteria;p__Chloroflexota;c__Chloroflexia;o__Chloroflexales;f__Chloroflexaceae;g__;s__	752	5499400	0.994836	4.14	25	3.105	91.38	100	93.104
3300017452_5	>90% completeness AND <5% contamination	Nayfach et al.	d__Bacteria;p__Chloroflexota;c__Chloroflexia;o__Chloroflexales;f__Chloroflexaceae;g__;s__	519	4517640	1.62452	0.69	0	0.69	89.66	100	91.728
3300017467_2	>90% completeness AND <5% contamination	Nayfach et al.	d__Bacteria;p__Chloroflexota;c__Chloroflexia;o__Chloroflexales;f__Chloroflexaceae;g__;s__	516	4542680	1.45927	1.71	25	1.2825	88.79	95	90.032
3300025717_5	>90% completeness AND <5% contamination	Nayfach et al.	d__Bacteria;p__Chloroflexota;c__Chloroflexia;o__Chloroflexales;f__Chloroflexaceae;g__;s__	384	7481510	0.33683	0	0	0	97.41	100	97.928
3300027515_2	>90% completeness AND <5% contamination	Nayfach et al.	d__Bacteria;p__Chloroflexota;c__Chloroflexia;o__Chloroflexales;f__Chloroflexaceae;g__;s__	189	5146390	1.85509	4.14	50	2.07	99.14	90	97.312
GCA_013336035.1_ASM1333603v1_genomic	>90% completeness AND <5% contamination	Genbank	d__Bacteria;p__Chloroflexota;c__Chloroflexia;o__Chloroflexales;f__Chloroflexaceae;g__CAIWXH01;s__	1643	9250550	0.184638	2.57	25	1.9275	95.69	95	95.552
GCA_903868955.1_freshwater_MAG_---_Day6-6_bin-125_genomic	>90% completeness AND <5% contamination	Genbank	d__Bacteria;p__Chloroflexota;c__Chloroflexia;o__Chloroflexales;f__Chloroflexaceae;g__CAIWXH01;s__CAIWXH01 sp903916565	836	5947270	0.951529	2.41	0	2.41	97.41	90	95.928
GCA_903916565.1_freshwater_MAG_---_Kiruna_bin-09937_genomic	>90% completeness AND <5% contamination	Genbank	d__Bacteria;p__Chloroflexota;c__Chloroflexia;o__Chloroflexales;f__Chloroflexaceae;g__CAIWXH01;s__CAIWXH01 sp903916565	850	5525880	1.06861	2.41	33.33	1.60675	93.97	95	94.176
3300017419_5	>90% completeness AND <5% contamination	Nayfach et al.	d__Bacteria;p__Chloroflexota;c__Chloroflexia;o__Chloroflexales;f__Chloroflexaceae;g__Chloroflexus;s__	146	4370760	1.8999	0.69	0	0.69	100	100	100
GCA_000021945.1_ASM2194v1_genomic	>90% completeness AND <5% contamination	Genbank	d__Bacteria;p__Chloroflexota;c__Chloroflexia;o__Chloroflexales;f__Chloroflexaceae;g__Chloroflexus;s__Chloroflexus aggregans	1	4684930	0	0.69	0	0.69	99.14	100	99.312
480224	>90% completeness AND <5% contamination	PATRIC	d__Bacteria;p__Chloroflexota;c__Chloroflexia;o__Chloroflexales;f__Chloroflexaceae;g__Chloroflexus;s__Chloroflexus aurantiacus	1	5268950	0	0.69	0	0.69	99.14	100	99.312
GCA_014874515.1_ASM1487451v1_genomic	>90% completeness AND <5% contamination	Genbank	d__Bacteria;p__Chloroflexota;c__Chloroflexia;o__Chloroflexales;f__Chloroflexaceae;g__Chloroflexus;s__Chloroflexus aurantiacus	251	4900120	1.28834	0.69	0	0.69	95.69	95	95.552
GCA_001650695.1_ASM165069v1_genomic	>90% completeness AND <5% contamination	Genbank	d__Bacteria;p__Chloroflexota;c__Chloroflexia;o__Chloroflexales;f__Chloroflexaceae;g__Chloroflexus;s__Chloroflexus islandicus	125	5136890	0.285581	0.69	0	0.69	100	90	98
3300020153_12	>90% completeness AND <5% contamination	Nayfach et al.	d__Bacteria;p__Chloroflexota;c__Chloroflexia;o__Chloroflexales;f__Chloroflexaceae;g__Chloroflexus;s__Chloroflexus sp000516515	296	4483530	3.67947	0.69	0	0.69	94.83	100	95.864
GCA_000516515.1_ASM51651v1_genomic	>90% completeness AND <5% contamination	Genbank	d__Bacteria;p__Chloroflexota;c__Chloroflexia;o__Chloroflexales;f__Chloroflexaceae;g__Chloroflexus;s__Chloroflexus sp000516515	1	4890990	0	0.69	0	0.69	100	100	100
GCA_000735195.1_ASM73519v1_genomic	>90% completeness AND <5% contamination	Genbank	d__Bacteria;p__Chloroflexota;c__Chloroflexia;o__Chloroflexales;f__Chloroflexaceae;g__Chloroflexus;s__Chloroflexus sp000735195	251	4770270	0.448193	0.69	0	0.69	100	100	100
GCA_017743515.1_ASM1774351v1_genomic	>90% completeness AND <5% contamination	Genbank	d__Bacteria;p__Chloroflexota;c__Chloroflexia;o__Chloroflexales;f__Chloroflexaceae;g__Chloroflexus;s__Chloroflexus sp000735195	438	4050290	1.25744	0.69	0	0.69	92.24	100	93.792
GCA_017743535.1_ASM1774353v1_genomic	>90% completeness AND <5% contamination	Genbank	d__Bacteria;p__Chloroflexota;c__Chloroflexia;o__Chloroflexales;f__Chloroflexaceae;g__Chloroflexus;s__Chloroflexus sp000735195	252	4458660	3.23752	1.03	0	1.03	98.28	100	98.624
GCA_017743655.1_ASM1774365v1_genomic	>90% completeness AND <5% contamination	Genbank	d__Bacteria;p__Chloroflexota;c__Chloroflexia;o__Chloroflexales;f__Chloroflexaceae;g__Chloroflexus;s__Chloroflexus sp000735195	484	3902390	2.8562	0.16	0	0.16	95.3	95	95.24
GCA_004138165.1_ASM413816v1_genomic	>90% completeness AND <5% contamination	Genbank	d__Bacteria;p__Chloroflexota;c__Chloroflexia;o__Chloroflexales;f__Chloroflexaceae;g__Chloroploca;s__Chloroploca sp004138165	171	6376500	3.83502	0.69	0	0.69	99.14	100	99.312
GCA_012032775.1_ASM1203277v1_genomic	>90% completeness AND <5% contamination	Genbank	d__Bacteria;p__Chloroflexota;c__Chloroflexia;o__Chloroflexales;f__Chloroflexaceae;g__JAAUQO01;s__JAAUQO01 sp012032775	374	6265440	3.46696	2.41	0	2.41	93.97	100	95.176
GCA_012034075.1_ASM1203407v1_genomic	>90% completeness AND <5% contamination	Genbank	d__Bacteria;p__Chloroflexota;c__Chloroflexia;o__Chloroflexales;f__Chloroflexaceae;g__JAAURD01;s__JAAURD01 sp012034075	369	5005010	2.0961	0	0	0	98.12	95	97.496
GCA_012032475.1_ASM1203247v1_genomic	>90% completeness AND <5% contamination	Genbank	d__Bacteria;p__Chloroflexota;c__Chloroflexia;o__Chloroflexales;f__Chloroflexaceae;g__JAAUSY01;s__JAAUSY01 sp012032475	310	4611660	3.04055	0.16	0	0.16	93.97	90	93.176
GCA_012031225.1_ASM1203122v1_genomic	>90% completeness AND <5% contamination	Genbank	d__Bacteria;p__Chloroflexota;c__Chloroflexia;o__Chloroflexales;f__Chloroflexaceae;g__JAAUTZ01;s__JAAUTZ01 sp012031225	205	4210920	0.262413	0	0	0	97.41	100	97.928
GCA_013388805.1_ASM1338880v1_genomic	>90% completeness AND <5% contamination	Genbank	d__Bacteria;p__Chloroflexota;c__Chloroflexia;o__Chloroflexales;f__Chloroflexaceae;g__JACAEO01;s__JACAEO01 sp013388805	459	4567440	1.69833	0.69	0	0.69	93.97	100	95.176
GCA_004367505.1_ASM436750v1_genomic	>90% completeness AND <5% contamination	Genbank	d__Bacteria;p__Chloroflexota;c__Chloroflexia;o__Chloroflexales;f__Chloroflexaceae;g__OHK40;s__OHK40 sp004367505	301	6934040	3.02205	0.69	0	0.69	96.55	100	97.24
2.86671e+06	>90% completeness AND <5% contamination	PATRIC	d__Bacteria;p__Chloroflexota;c__Chloroflexia;o__Chloroflexales;f__Chloroflexaceae;g__Oscillochloris;s__	182	6688910	1.25073	0	0	0	97.41	95	96.928
3300025455_1	>90% completeness AND <5% contamination	Nayfach et al.	d__Bacteria;p__Chloroflexota;c__Chloroflexia;o__Chloroflexales;f__Chloroflexaceae;g__Oscillochloris;s__	538	5579590	2.15553	4.31	100	0	93.1	100	94.48
GCA_004138135.1_ASM413813v1_genomic	>90% completeness AND <5% contamination	Genbank	d__Bacteria;p__Chloroflexota;c__Chloroflexia;o__Chloroflexales;f__Chloroflexaceae;g__Oscillochloris;s__Oscillochloris fontis	139	4463430	1.51565	0	0	0	99.14	100	99.312
GCA_004138175.2_ASM413817v2_genomic	>90% completeness AND <5% contamination	Genbank	d__Bacteria;p__Chloroflexota;c__Chloroflexia;o__Chloroflexales;f__Chloroflexaceae;g__Oscillochloris;s__Oscillochloris sp004138175	127	6269250	2.42645	0	0	0	98.28	95	97.624
GCA_903887465.1_freshwater_MAG_---_LJ_bin-2023_genomic	>90% completeness AND <5% contamination	Genbank	d__Bacteria;p__Chloroflexota;c__Chloroflexia;o__Chloroflexales;f__Chloroflexaceae;g__Oscillochloris;s__Oscillochloris sp903887465	475	4689030	2.76902	0	0	0	98.28	95	97.624
GCA_903920315.1_freshwater_MAG_---_KT5_bin-278_genomic	>90% completeness AND <5% contamination	Genbank	d__Bacteria;p__Chloroflexota;c__Chloroflexia;o__Chloroflexales;f__Chloroflexaceae;g__Oscillochloris;s__Oscillochloris sp903920315	716	5498350	1.64795	3.37	71.43	0.962809	98.12	90	96.496
GCA_000152145.1_ASM15214v1_genomic	>90% completeness AND <5% contamination	Genbank	d__Bacteria;p__Chloroflexota;c__Chloroflexia;o__Chloroflexales;f__Chloroflexaceae;g__Oscillochloris;s__Oscillochloris trichoides	7	4373070	0	0	0	0	99.14	100	99.312
GCA_003934145.1_ASM393414v1_genomic	>90% completeness AND <5% contamination	Genbank	d__Bacteria;p__Chloroflexota;c__Chloroflexia;o__Chloroflexales;f__Chloroflexaceae;g__Viridilinea;s__	972	6104040	1.17136	0.69	0	0.69	97.41	80	93.928
GCA_903878195.1_freshwater_MAG_---_LaPlata-b_bin-1060_genomic	>90% completeness AND <5% contamination	Genbank	d__Bacteria;p__Chloroflexota;c__Chloroflexia;o__Chloroflexales;f__Chloroflexaceae;g__Viridilinea;s__Viridilinea sp903915775	587	4479100	3.13478	2.41	33.33	1.60675	94.83	85	92.864
2.02672e+06	>90% completeness AND <5% contamination	PATRIC	d__Bacteria;p__Chloroflexota;c__Chloroflexia;o__Chloroflexales;f__Herpetosiphonaceae;g__Herpetosiphon;s__	13	6036300	3.01824	0	0	0	100	95	99
GCA_001306135.1_ASM130613v1_genomic	>90% completeness AND <5% contamination	Genbank	d__Bacteria;p__Chloroflexota;c__Chloroflexia;o__Chloroflexales;f__Herpetosiphonaceae;g__Herpetosiphon;s__Herpetosiphon geysericola	46	6140410	2.63354	0	0	0	100	95	99
GCA_003205875.1_ASM320587v1_genomic	>90% completeness AND <5% contamination	Genbank	d__Bacteria;p__Chloroflexota;c__Chloroflexia;o__Chloroflexales;f__Herpetosiphonaceae;g__Herpetosiphon;s__Herpetosiphon llansteffanensis	169	6140150	0.147228	0	0	0	100	95	99
GCA_013821605.1_ASM1382160v1_genomic	>90% completeness AND <5% contamination	Genbank	d__Bacteria;p__Chloroflexota;c__Chloroflexia;o__Chloroflexales;f__Herpetosiphonaceae;g__JACDGP01;s__JACDGP01 sp013821605	259	5883270	1.54421	0.31	0	0.31	97.41	95	96.928
3300018910_5	>90% completeness AND <5% contamination	Nayfach et al.	d__Bacteria;p__Chloroflexota;c__Chloroflexia;o__Chloroflexales;f__Herpetosiphonaceae;g__JKG1;s__	625	6745730	0.455399	0.86	100	0	95.53	95	95.424
GCA_013538855.1_ASM1353885v1_genomic	>90% completeness AND <5% contamination	Genbank	d__Bacteria;p__Chloroflexota;c__Chloroflexia;o__Chloroflexales;f__Herpetosiphonaceae;g__OHK22;s__OHK22 sp013538855	285	6335030	4.14773	0	0	0	96.55	95	96.24
GCA_013122415.1_ASM1312241v1_genomic	>90% completeness AND <5% contamination	Genbank	d__Bacteria;p__Chloroflexota;c__Chloroflexia;o__Chloroflexales;f__Roseiflexaceae;g__AL-N1;s__AL-N1 sp013122435	41	7920250	2.17582	3.45	0	3.45	96.55	95	96.24
GCA_018969485.1_ASM1896948v1_genomic	>90% completeness AND <5% contamination	Genbank	d__Bacteria;p__Chloroflexota;c__Chloroflexia;o__Chloroflexales;f__Roseiflexaceae;g__CAIQIY01;s__	247	4022820	0.406928	3.45	0	3.45	96.55	80	93.24
GCA_013388755.1_ASM1338875v1_genomic	>90% completeness AND <5% contamination	Genbank	d__Bacteria;p__Chloroflexota;c__Chloroflexia;o__Chloroflexales;f__Roseiflexaceae;g__JACAEQ01;s__JACAEQ01 sp013388755	145	5076080	1.87921	0	0	0	99.14	95	98.312
3300015360_32	>90% completeness AND <5% contamination	Nayfach et al.	d__Bacteria;p__Chloroflexota;c__Chloroflexia;o__Chloroflexales;f__Roseiflexaceae;g__Kouleothrix;s__	721	6253110	0.0802801	3.45	50	1.725	90.52	90	90.416
3300025571_8	>90% completeness AND <5% contamination	Nayfach et al.	d__Bacteria;p__Chloroflexota;c__Chloroflexia;o__Chloroflexales;f__Roseiflexaceae;g__Kouleothrix;s__	124	6704690	0	3.45	0	3.45	99.14	100	99.312
GCA_016717335.1_ASM1671733v1_genomic	>90% completeness AND <5% contamination	Genbank	d__Bacteria;p__Chloroflexota;c__Chloroflexia;o__Chloroflexales;f__Roseiflexaceae;g__Kouleothrix;s__	19	8174340	0	1.72	0	1.72	98.28	100	98.624
GCA_016722075.1_ASM1672207v1_genomic	>90% completeness AND <5% contamination	Genbank	d__Bacteria;p__Chloroflexota;c__Chloroflexia;o__Chloroflexales;f__Roseiflexaceae;g__Kouleothrix;s__	4	7093240	1.1143	0	0	0	98.28	100	98.624
GCA_018266315.1_ASM1826631v1_genomic	>90% completeness AND <5% contamination	Genbank	d__Bacteria;p__Chloroflexota;c__Chloroflexia;o__Chloroflexales;f__Roseiflexaceae;g__Kouleothrix;s__	245	5274510	2.19907	3.45	0	3.45	92.55	100	94.04
GCA_001399705.1_ASM139970v1_genomic	>90% completeness AND <5% contamination	Genbank	d__Bacteria;p__Chloroflexota;c__Chloroflexia;o__Chloroflexales;f__Roseiflexaceae;g__Kouleothrix;s__Kouleothrix aurantiaca	3843	7798340	1.08305	2.57	0	2.57	90.2	100	92.16
3300014149_4	>90% completeness AND <5% contamination	Nayfach et al.	d__Bacteria;p__Chloroflexota;c__Chloroflexia;o__Chloroflexales;f__Roseiflexaceae;g__Roseiflexus;s__	301	5488580	0	0	0	0	97.41	100	97.928
GCA_017743475.1_ASM1774347v1_genomic	>90% completeness AND <5% contamination	Genbank	d__Bacteria;p__Chloroflexota;c__Chloroflexia;o__Chloroflexales;f__Roseiflexaceae;g__Roseiflexus;s__	206	4972450	1.64768	0	0	0	99.14	100	99.312
GCA_000017805.1_ASM1780v1_genomic	>90% completeness AND <5% contamination	Genbank	d__Bacteria;p__Chloroflexota;c__Chloroflexia;o__Chloroflexales;f__Roseiflexaceae;g__Roseiflexus;s__Roseiflexus castenholzii	1	5723300	0	0	0	0	99.14	100	99.312
GCA_002877835.1_ASM287783v1_genomic	>90% completeness AND <5% contamination	Genbank	d__Bacteria;p__Chloroflexota;c__Chloroflexia;o__Chloroflexales;f__Roseiflexaceae;g__Roseiflexus;s__Roseiflexus castenholzii	1224	4748160	1.39338	0	0	0	94.67	80	91.736
3300020153_8	>90% completeness AND <5% contamination	Nayfach et al.	d__Bacteria;p__Chloroflexota;c__Chloroflexia;o__Chloroflexales;f__Roseiflexaceae;g__Roseiflexus;s__Roseiflexus sp000016665	524	5012550	1.14193	0	0	0	95.69	100	96.552
GCA_000016665.1_ASM1666v1_genomic	>90% completeness AND <5% contamination	Genbank	d__Bacteria;p__Chloroflexota;c__Chloroflexia;o__Chloroflexales;f__Roseiflexaceae;g__Roseiflexus;s__Roseiflexus sp000016665	1	5801600	0	0	0	0	99.14	100	99.312
GCA_017743635.1_ASM1774363v1_genomic	>90% completeness AND <5% contamination	Genbank	d__Bacteria;p__Chloroflexota;c__Chloroflexia;o__Chloroflexales;f__Roseiflexaceae;g__Roseiflexus;s__Roseiflexus sp000016665	706	3656680	0.753689	0.16	100	0	93.97	90	93.176
GCA_009268125.1_ASM926812v1_genomic	>90% completeness AND <5% contamination	Genbank	d__Bacteria;p__Chloroflexota;c__Chloroflexia;o__Chloroflexales;f__Roseiflexaceae;g__SDU3-3;s__SDU3-3 sp009268125	51	6761920	0.224788	0	0	0	100	95	99
3300013132_47	>90% completeness AND <5% contamination	Nayfach et al.	d__Bacteria;p__Chloroflexota;c__Chloroflexia;o__Chloroflexales;f__Roseiflexaceae;g__UBA965;s__	188	3168800	1.61607	0	0	0	96.63	95	96.304
3300022752_27	>90% completeness AND <5% contamination	Nayfach et al.	d__Bacteria;p__Chloroflexota;c__Chloroflexia;o__Chloroflexales;f__Roseiflexaceae;g__UBA965;s__	192	3140070	0	0	0	0	90.52	100	92.416
GCA_002292925.1_ASM229292v1_genomic	>90% completeness AND <5% contamination	Genbank	d__Bacteria;p__Chloroflexota;c__Chloroflexia;o__Chloroflexales;f__Roseiflexaceae;g__UBA965;s__UBA965 sp002292925	309	3244170	0	0	0	0	97.41	90	95.928
GCA_903868295.1_freshwater_MAG_---_ErkenSummer_bin-4103_genomic	>90% completeness AND <5% contamination	Genbank	d__Bacteria;p__Chloroflexota;c__Chloroflexia;o__Chloroflexales;f__Roseiflexaceae;g__UBA965;s__UBA965 sp903868295	625	3226000	0.82765	3.45	100	0	91.93	95	92.544
GCA_903849735.1_freshwater_MAG_---_Erken-D7_bin-0754_genomic	>90% completeness AND <5% contamination	Genbank	d__Bacteria;p__Chloroflexota;c__Chloroflexia;o__Chloroflexales;f__Roseiflexaceae;g__UBA965;s__UBA965 sp903889425	635	3332790	0.940353	0	0	0	94.75	90	93.8
GCA_903862005.1_freshwater_MAG_---_Erken-D3_bin-0010_genomic	>90% completeness AND <5% contamination	Genbank	d__Bacteria;p__Chloroflexota;c__Chloroflexia;o__Chloroflexales;f__Roseiflexaceae;g__UBA965;s__UBA965 sp903889425	652	3416220	0.639303	0.16	100	0	93.97	85	92.176
GCA_903889425.1_freshwater_MAG_---_Erken-D4_bin-0303_genomic	>90% completeness AND <5% contamination	Genbank	d__Bacteria;p__Chloroflexota;c__Chloroflexia;o__Chloroflexales;f__Roseiflexaceae;g__UBA965;s__UBA965 sp903889425	540	3634490	0.492779	0.16	0	0.16	95.69	80	92.552
GCA_903912165.1_freshwater_MAG_---_Erken-D6_bin-0093_genomic	>90% completeness AND <5% contamination	Genbank	d__Bacteria;p__Chloroflexota;c__Chloroflexia;o__Chloroflexales;f__Roseiflexaceae;g__UBA965;s__UBA965 sp903889425	708	3268110	0.507633	0.31	100	0	94.44	85	92.552
GCA_903938865.1_freshwater_MAG_---_Loc080925-4-5m_bin-0666_genomic	>90% completeness AND <5% contamination	Genbank	d__Bacteria;p__Chloroflexota;c__Chloroflexia;o__Chloroflexales;f__Roseiflexaceae;g__UBA965;s__UBA965 sp903932805	574	3141180	0.339363	1.88	100	0	95.69	80	92.552
GCA_903940205.1_freshwater_MAG_---_Loc080925-4m_bin-0407_genomic	>90% completeness AND <5% contamination	Genbank	d__Bacteria;p__Chloroflexota;c__Chloroflexia;o__Chloroflexales;f__Roseiflexaceae;g__UBA965;s__UBA965 sp903932805	605	3101440	0.798661	0	0	0	93.97	85	92.176
GCA_903953635.1_freshwater_MAG_---_Loc080925-5m_bin-0525_genomic	>90% completeness AND <5% contamination	Genbank	d__Bacteria;p__Chloroflexota;c__Chloroflexia;o__Chloroflexales;f__Roseiflexaceae;g__UBA965;s__UBA965 sp903932805	614	3132730	0.94614	1.72	100	0	96.55	75	92.24
GCA_011388535.1_ASM1138853v1_genomic	>90% completeness AND <5% contamination	Genbank	d__Bacteria;p__Chloroflexota;c__Chloroflexia;o__DTKN01;f__DTKN01;g__DRUS01;s__DRUS01 sp011388535	381	2542580	0	0.16	100	0	89.66	95	90.728
GCA_011333455.1_ASM1133345v1_genomic	>90% completeness AND <5% contamination	Genbank	d__Bacteria;p__Chloroflexota;c__Chloroflexia;o__DTKN01;f__DTKN01;g__DTKN01;s__DTKN01 sp011333455	122	2970820	0	0	0	0	98.28	90	96.624
GCA_902810765.1_chloroflexi_genomic	>90% completeness AND <5% contamination	Genbank	d__Bacteria;p__Chloroflexota;c__Thermomicrobia;o__Thermobaculales;f__Thermobaculaceae;g__CADDYR01;s__CADDYR01 sp902810765	384	3981230	0	3.61	33.33	2.40679	98.28	100	98.624
GCA_016782175.1_ASM1678217v1_genomic	>90% completeness AND <5% contamination	Genbank	d__Bacteria;p__Chloroflexota;c__Thermomicrobia;o__Thermobaculales;f__Thermobaculaceae;g__JACDAU01;s__	598	3883410	1.74306	2.59	0	2.59	95.61	75	91.488
3300000169_13	>90% completeness AND <5% contamination	Nayfach et al.	d__Bacteria;p__Chloroflexota;c__Thermomicrobia;o__Thermobaculales;f__Thermobaculaceae;g__Thermobaculum;s__Thermobaculum terrenum	126	1847570	2.87675	0	0	0	95.69	95	95.552
3300000205_18	>90% completeness AND <5% contamination	Nayfach et al.	d__Bacteria;p__Chloroflexota;c__Thermomicrobia;o__Thermobaculales;f__Thermobaculaceae;g__Thermobaculum;s__Thermobaculum terrenum	69	1920450	0.584238	0	0	0	93.97	100	95.176
3300005274_9	>90% completeness AND <5% contamination	Nayfach et al.	d__Bacteria;p__Chloroflexota;c__Thermomicrobia;o__Thermobaculales;f__Thermobaculaceae;g__Thermobaculum;s__Thermobaculum terrenum	16	1932520	0	0	0	0	95.69	100	96.552
GCA_019637585.1_ASM1963758v1_genomic	>90% completeness AND <5% contamination	Genbank	d__Bacteria;p__Chloroflexota;c__Thermomicrobia;o__Thermomicrobiales;f__;g__;s__	33	3942560	3.15151	0	0	0	98.28	95	97.624
GCA_902806415.1_AVDCRST-MAG18_genomic	>90% completeness AND <5% contamination	Genbank	d__Bacteria;p__Chloroflexota;c__Thermomicrobia;o__Thermomicrobiales;f__CADCWN01;g__CADCWN01;s__CADCWN01 sp902806415	425	5164300	3.30597	0	0	0	95.69	95	95.552
GCA_003577355.1_ASM357735v1_genomic	>90% completeness AND <5% contamination	Genbank	d__Bacteria;p__Chloroflexota;c__Thermomicrobia;o__Thermomicrobiales;f__CFX8;g__CFX8;s__CFX8 sp003577355	535	4430360	1.75968	0	0	0	92.01	85	90.608
GCA_014874455.1_ASM1487445v1_genomic	>90% completeness AND <5% contamination	Genbank	d__Bacteria;p__Chloroflexota;c__Thermomicrobia;o__Thermomicrobiales;f__Thermomicrobiaceae;g__HRBIN26;s__	114	3365290	0.730695	0	0	0	100	95	99
GCA_011054265.1_ASM1105426v1_genomic	>90% completeness AND <5% contamination	Genbank	d__Bacteria;p__Chloroflexota;c__Thermomicrobia;o__Thermomicrobiales;f__Thermomicrobiaceae;g__HRBIN26;s__HRBIN26 peleae_A	361	3165660	2.55207	3.45	66.67	1.14988	91.38	95	92.104
GCA_000297255.1_ASM29725v1_genomic	>90% completeness AND <5% contamination	Genbank	d__Bacteria;p__Chloroflexota;c__Thermomicrobia;o__Thermomicrobiales;f__Thermomicrobiaceae;g__Nitrolancea;s__Nitrolancea hollandica	736	3888100	0.468609	1.72	0	1.72	96.55	90	95.24
GCA_007124015.1_ASM712401v1_genomic	>90% completeness AND <5% contamination	Genbank	d__Bacteria;p__Chloroflexota;c__Thermomicrobia;o__Thermomicrobiales;f__Thermomicrobiaceae;g__SLMJ01;s__SLMJ01 sp007133615	488	3570190	0.442273	2.04	75	0.51	93.1	80	90.48
GCA_007133615.1_ASM713361v1_genomic	>90% completeness AND <5% contamination	Genbank	d__Bacteria;p__Chloroflexota;c__Thermomicrobia;o__Thermomicrobiales;f__Thermomicrobiaceae;g__SLMJ01;s__SLMJ01 sp007133615	412	3778160	0.438573	0	0	0	96.55	90	95.24
GCA_007695115.1_ASM769511v1_genomic	>90% completeness AND <5% contamination	Genbank	d__Bacteria;p__Chloroflexota;c__Thermomicrobia;o__Thermomicrobiales;f__Thermomicrobiaceae;g__SLMJ01;s__SLMJ01 sp007695115	186	3676280	1.16504	0	0	0	96.55	95	96.24
3300027316_2	>90% completeness AND <5% contamination	Nayfach et al.	d__Bacteria;p__Chloroflexota;c__Thermomicrobia;o__Thermomicrobiales;f__Thermomicrobiaceae;g__Sphaerobacter;s__	22	4046500	0	0	0	0	98.28	100	98.624
GCA_000024985.1_ASM2498v1_genomic	>90% completeness AND <5% contamination	Genbank	d__Bacteria;p__Chloroflexota;c__Thermomicrobia;o__Thermomicrobiales;f__Thermomicrobiaceae;g__Sphaerobacter;s__Sphaerobacter thermophilus	2	3993760	0	0	0	0	98.28	100	98.624
GCA_003242625.1_ASM324262v1_genomic	>90% completeness AND <5% contamination	Genbank	d__Bacteria;p__Chloroflexota;c__Thermomicrobia;o__Thermomicrobiales;f__Thermomicrobiaceae;g__Sphaerobacter;s__Sphaerobacter thermophilus	412	3922950	1.33445	1.72	100	0	96.55	85	94.24
3300005300_3	>90% completeness AND <5% contamination	Nayfach et al.	d__Bacteria;p__Chloroflexota;c__Thermomicrobia;o__Thermomicrobiales;f__Thermomicrobiaceae;g__Thermomicrobium;s__	198	2692610	1.36299	1.72	0	1.72	98.28	95	97.624
3300005858_7	>90% completeness AND <5% contamination	Nayfach et al.	d__Bacteria;p__Chloroflexota;c__Thermomicrobia;o__Thermomicrobiales;f__Thermomicrobiaceae;g__Thermomicrobium;s__Thermomicrobium roseum	30	2940710	1.32383	0	0	0	98.28	100	98.624
3300027279_11	>90% completeness AND <5% contamination	Nayfach et al.	d__Bacteria;p__Chloroflexota;c__Thermomicrobia;o__Thermomicrobiales;f__Thermomicrobiaceae;g__Thermomicrobium;s__Thermomicrobium roseum	28	2539390	0	5.17	100	0	98.28	90	96.624
GCA_000021685.1_ASM2168v1_genomic	>90% completeness AND <5% contamination	Genbank	d__Bacteria;p__Chloroflexota;c__Thermomicrobia;o__Thermomicrobiales;f__Thermomicrobiaceae;g__Thermomicrobium;s__Thermomicrobium roseum	2	2920740	0	0	0	0	98.28	100	98.624
GCA_017743255.1_ASM1774325v1_genomic	>90% completeness AND <5% contamination	Genbank	d__Bacteria;p__Chloroflexota;c__Thermomicrobia;o__Thermomicrobiales;f__Thermomicrobiaceae;g__Thermomicrobium;s__Thermomicrobium roseum	237	2826410	1.35614	0.86	100	0	97.26	90	95.808
GCA_017743395.1_ASM1774339v1_genomic	>90% completeness AND <5% contamination	Genbank	d__Bacteria;p__Chloroflexota;c__Thermomicrobia;o__Thermomicrobiales;f__Thermomicrobiaceae;g__Thermomicrobium;s__Thermomicrobium roseum	183	2753330	1.29298	0	0	0	97.41	95	96.928
GCA_017743575.1_ASM1774357v1_genomic	>90% completeness AND <5% contamination	Genbank	d__Bacteria;p__Chloroflexota;c__Thermomicrobia;o__Thermomicrobiales;f__Thermomicrobiaceae;g__Thermomicrobium;s__Thermomicrobium roseum	206	2798720	1.29238	0	0	0	98.28	95	97.624
GCA_017743705.1_ASM1774370v1_genomic	>90% completeness AND <5% contamination	Genbank	d__Bacteria;p__Chloroflexota;c__Thermomicrobia;o__Thermomicrobiales;f__Thermomicrobiaceae;g__Thermomicrobium;s__Thermomicrobium roseum	273	2495400	1.97523	1.9	25	1.425	96.55	90	95.24
GCA_011054015.1_ASM1105401v1_genomic	>90% completeness AND <5% contamination	Genbank	d__Bacteria;p__Chloroflexota;c__Thermomicrobia;o__Thermomicrobiales;f__Thermomicrobiaceae;g__Thermomicrobium;s__Thermomicrobium sp002898255	14	3002280	3.21123	0	0	0	98.28	95	97.624
3300027319_7	>90% completeness AND <5% contamination	Nayfach et al.	d__Bacteria;p__Chloroflexota;c__Thermomicrobia;o__Thermomicrobiales;f__Thermomicrobiaceae;g__Thermomicrobium;s__Thermomicrobium sp002898975	161	2771790	3.66694	0	0	0	95.98	95	95.784
GCA_000744775.1_ASM74477v1_genomic	>90% completeness AND <5% contamination	Genbank	d__Bacteria;p__Chloroflexota;c__Thermomicrobia;o__Thermomicrobiales;f__Thermomicrobiaceae;g__Thermorudis;s__Thermorudis peleae	4	2934620	0	0	0	0	95.69	100	96.552
GCA_019690065.1_ASM1969006v1_genomic	>90% completeness AND <5% contamination	Genbank	d__Bacteria;p__Chloroflexota;c__Thermomicrobia;o__Thermomicrobiales;f__Thermomicrobiaceae;g__Thermorudis;s__Thermorudis peleae	349	2911440	0.33626	6.03	100	0	95.69	85	93.552
3300009084_65	>90% completeness AND <5% contamination	Nayfach et al.	d__Bacteria;p__Chloroflexota;c__Thermomicrobia;o__Thermomicrobiales;f__UBA6265;g__;s__	578	4591390	0.752931	3.45	0	3.45	88.62	100	90.896
3300025854_1	>90% completeness AND <5% contamination	Nayfach et al.	d__Bacteria;p__Chloroflexota;c__Thermomicrobia;o__Thermomicrobiales;f__UBA6265;g__;s__	203	4170630	1.8894	1.72	0	1.72	93.1	95	93.48
GCA_902806325.1_AVDCRST-MAG73_genomic	>90% completeness AND <5% contamination	Genbank	d__Bacteria;p__Chloroflexota;c__Thermomicrobia;o__Thermomicrobiales;f__UBA6265;g__CADCWE01;s__CADCWE01 sp902806325	273	4167330	1.40714	0.16	100	0	93.1	95	93.48
GCA_902806345.1_AVDCRST-MAG59_genomic	>90% completeness AND <5% contamination	Genbank	d__Bacteria;p__Chloroflexota;c__Thermomicrobia;o__Thermomicrobiales;f__UBA6265;g__CADCWF01;s__CADCWF01 sp902806345	377	5078610	3.32414	0.16	100	0	99.14	85	96.312
GCA_902806335.1_AVDCRST-MAG49_genomic	>90% completeness AND <5% contamination	Genbank	d__Bacteria;p__Chloroflexota;c__Thermomicrobia;o__Thermomicrobiales;f__UBA6265;g__CADCWG01;s__CADCWG01 sp902806335	332	4820190	1.55035	0	0	0	97.41	85	94.928
GCA_902806375.1_AVDCRST-MAG33_genomic	>90% completeness AND <5% contamination	Genbank	d__Bacteria;p__Chloroflexota;c__Thermomicrobia;o__Thermomicrobiales;f__UBA6265;g__CADCWK01;s__CADCWK01 sp902806375	424	3381490	2.46637	2.04	100	0	92.08	85	90.664
GCA_902806405.1_AVDCRST-MAG19_genomic	>90% completeness AND <5% contamination	Genbank	d__Bacteria;p__Chloroflexota;c__Thermomicrobia;o__Thermomicrobiales;f__UBA6265;g__CADCWL01;s__CADCWL01 sp902806405	266	4616060	4.04046	0	0	0	98.28	90	96.624
GCA_013698285.1_ASM1369828v1_genomic	>90% completeness AND <5% contamination	Genbank	d__Bacteria;p__Chloroflexota;c__Thermomicrobia;o__Thermomicrobiales;f__UBA6265;g__JACCVE01;s__JACCVE01 sp013698285	632	3191200	0.360366	1.88	100	0	92.08	85	90.664
GCA_013697005.1_ASM1369700v1_genomic	>90% completeness AND <5% contamination	Genbank	d__Bacteria;p__Chloroflexota;c__Thermomicrobia;o__Thermomicrobiales;f__UBA6265;g__JACCXM01;s__JACCXM01 sp013697005	479	4045990	0.561049	0	0	0	95.69	90	94.552
2.48279e+06	>90% completeness AND <5% contamination	PATRIC	d__Bacteria;p__Chloroflexota;c__Thermomicrobia;o__Thermomicrobiales;f__UBA6265;g__UBA6265;s__	105	3216340	0.0450823	1.18	33.33	0.786706	97.96	90	96.368
3300005613_29	>90% completeness AND <5% contamination	Nayfach et al.	d__Bacteria;p__Chloroflexota;c__Dehalococcoidia;o__;f__;g__;s__	60	2046190	0	2.04	100	0	88.79	95	90.032
3300020214_35	>90% completeness AND <5% contamination	Nayfach et al.	d__Bacteria;p__Chloroflexota;c__Dehalococcoidia;o__;f__;g__;s__	75	2402300	0	0.31	100	0	98.28	90	96.624
3300024353_43	>90% completeness AND <5% contamination	Nayfach et al.	d__Bacteria;p__Chloroflexota;c__Dehalococcoidia;o__;f__;g__;s__	158	2.08061e+06	0	3.45	0	3.45	93.97	90	93.176
3300027815_20	>90% completeness AND <5% contamination	Nayfach et al.	d__Bacteria;p__Chloroflexota;c__Dehalococcoidia;o__;f__;g__;s__	99	3798500	0	0.34	100	0	97.41	95	96.928
3300027819_23	>90% completeness AND <5% contamination	Nayfach et al.	d__Bacteria;p__Chloroflexota;c__Dehalococcoidia;o__;f__;g__;s__	205	4544380	0	0	0	0	97.41	100	97.928
3300027819_33	>90% completeness AND <5% contamination	Nayfach et al.	d__Bacteria;p__Chloroflexota;c__Dehalococcoidia;o__;f__;g__;s__	195	3889680	0	0	0	0	97.41	100	97.928
GCA_016183425.1_ASM1618342v1_genomic	>90% completeness AND <5% contamination	Genbank	d__Bacteria;p__Chloroflexota;c__Dehalococcoidia;o__;f__;g__;s__	52	2703300	0	0	0	0	93.97	100	95.176
GCA_016190665.1_ASM1619066v1_genomic	>90% completeness AND <5% contamination	Genbank	d__Bacteria;p__Chloroflexota;c__Dehalococcoidia;o__;f__;g__;s__	107	4998040	0	0	0	0	93.97	90	93.176
GCA_016210205.1_ASM1621020v1_genomic	>90% completeness AND <5% contamination	Genbank	d__Bacteria;p__Chloroflexota;c__Dehalococcoidia;o__;f__;g__;s__	34	1424890	0	0	0	0	88.79	95	90.032
3300027532_23	>90% completeness AND <5% contamination	Nayfach et al.	d__Bacteria;p__Chloroflexota;c__Dehalococcoidia;o__Bin125;f__Bin125;g__Bin125;s__Bin125 sp002239025	38	3260030	0	1.72	0	1.72	95.69	95	95.552
GCA_009835345.1_ASM983534v1_genomic	>90% completeness AND <5% contamination	Genbank	d__Bacteria;p__Chloroflexota;c__Dehalococcoidia;o__Bin125;f__Bin125;g__Bin125;s__Bin125 sp009838735	157	2914760	0	3.45	50	1.725	95.69	95	95.552
GCA_009836695.1_ASM983669v1_genomic	>90% completeness AND <5% contamination	Genbank	d__Bacteria;p__Chloroflexota;c__Dehalococcoidia;o__Bin125;f__Bin125;g__Bin125;s__Bin125 sp009838735	60	3079540	0	1.72	0	1.72	92.24	100	93.792
GCA_009838735.1_ASM983873v1_genomic	>90% completeness AND <5% contamination	Genbank	d__Bacteria;p__Chloroflexota;c__Dehalococcoidia;o__Bin125;f__Bin125;g__Bin125;s__Bin125 sp009838735	56	3149410	0	1.72	0	1.72	97.41	100	97.928
GCA_009841545.1_ASM984154v1_genomic	>90% completeness AND <5% contamination	Genbank	d__Bacteria;p__Chloroflexota;c__Dehalococcoidia;o__Bin125;f__Bin125;g__Bin125;s__Bin125 sp009838735	59	2975570	0	1.72	0	1.72	95.69	100	96.552
GCA_009838065.1_ASM983806v1_genomic	>90% completeness AND <5% contamination	Genbank	d__Bacteria;p__Chloroflexota;c__Dehalococcoidia;o__Bin125;f__Bin125;g__Bin125;s__Bin125 sp009838915	55	2665190	0	1.72	0	1.72	95.69	95	95.552
GCA_009838915.1_ASM983891v1_genomic	>90% completeness AND <5% contamination	Genbank	d__Bacteria;p__Chloroflexota;c__Dehalococcoidia;o__Bin125;f__Bin125;g__Bin125;s__Bin125 sp009838915	38	2865060	0	1.72	0	1.72	95.69	100	96.552
GCA_009841505.1_ASM984150v1_genomic	>90% completeness AND <5% contamination	Genbank	d__Bacteria;p__Chloroflexota;c__Dehalococcoidia;o__Bin125;f__Bin125;g__Bin125;s__Bin125 sp009838915	46	2742070	0	1.72	0	1.72	93.97	95	94.176
GCA_003552785.1_ASM355278v1_genomic	>90% completeness AND <5% contamination	Genbank	d__Bacteria;p__Chloroflexota;c__Dehalococcoidia;o__Dehalococcoidales;f__CSSed11-197;g__CSSed11-197;s__CSSed11-197 sp003552785	126	1422390	0	1.88	0	1.88	89.5	95	90.6
61435.2	>90% completeness AND <5% contamination	PATRIC	d__Bacteria;p__Chloroflexota;c__Dehalococcoidia;o__Dehalococcoidales;f__Dehalococcoidaceae;g__Dehalococcoides;s__Dehalococcoides mccartyi	1	1329200	0	0	0	0	96.39	95	96.112
61435.5	>90% completeness AND <5% contamination	PATRIC	d__Bacteria;p__Chloroflexota;c__Dehalococcoidia;o__Dehalococcoidales;f__Dehalococcoidaceae;g__Dehalococcoides;s__Dehalococcoides mccartyi	33	1571520	0.255167	0	0	0	96.39	95	96.112
3300013829_12	>90% completeness AND <5% contamination	Nayfach et al.	d__Bacteria;p__Chloroflexota;c__Dehalococcoidia;o__Dehalococcoidales;f__Dehalococcoidaceae;g__Dehalococcoides;s__Dehalococcoides mccartyi	1	1382940	0	0	0	0	96.39	100	97.112
GCA_000011905.1_ASM1190v1_genomic	>90% completeness AND <5% contamination	Genbank	d__Bacteria;p__Chloroflexota;c__Dehalococcoidia;o__Dehalococcoidales;f__Dehalococcoidaceae;g__Dehalococcoides;s__Dehalococcoides mccartyi	1	1469720	0	0	0	0	96.39	100	97.112
GCA_001678055.1_ASM167805v1_genomic	>90% completeness AND <5% contamination	Genbank	d__Bacteria;p__Chloroflexota;c__Dehalococcoidia;o__Dehalococcoidales;f__Dehalococcoidaceae;g__Dehalococcoides;s__Dehalococcoides mccartyi	8	1357300	0.0891476	0	0	0	96.39	100	97.112
GCA_002356375.1_ASM235637v1_genomic	>90% completeness AND <5% contamination	Genbank	d__Bacteria;p__Chloroflexota;c__Dehalococcoidia;o__Dehalococcoidales;f__Dehalococcoidaceae;g__Dehalococcoides;s__Dehalococcoides mccartyi	1	1387780	0	0	0	0	96.39	100	97.112
GCA_016463945.1_ASM1646394v1_genomic	>90% completeness AND <5% contamination	Genbank	d__Bacteria;p__Chloroflexota;c__Dehalococcoidia;o__Dehalococcoidales;f__Dehalococcoidaceae;g__Dehalococcoides;s__Dehalococcoides mccartyi	20	1404190	0.747762	0	0	0	96.39	100	97.112
61435.1	>90% completeness AND <5% contamination	PATRIC	d__Bacteria;p__Chloroflexota;c__Dehalococcoidia;o__Dehalococcoidales;f__Dehalococcoidaceae;g__Dehalococcoides;s__Dehalococcoides mccartyi_A	1	1521290	0	0	0	0	96.55	100	97.24
1.52267e+06	>90% completeness AND <5% contamination	PATRIC	d__Bacteria;p__Chloroflexota;c__Dehalococcoidia;o__Dehalococcoidales;f__Dehalococcoidaceae;g__Dehalococcoides;s__Dehalococcoides mccartyi_A	1	1473550	0	0	0	0	96.55	100	97.24
GCA_000025025.1_ASM2502v1_genomic	>90% completeness AND <5% contamination	Genbank	d__Bacteria;p__Chloroflexota;c__Dehalococcoidia;o__Dehalococcoidales;f__Dehalococcoidaceae;g__Dehalococcoides;s__Dehalococcoides mccartyi_A	1	1413460	0	0	0	0	96.55	100	97.24
216389	>90% completeness AND <5% contamination	PATRIC	d__Bacteria;p__Chloroflexota;c__Dehalococcoidia;o__Dehalococcoidales;f__Dehalococcoidaceae;g__Dehalococcoides;s__Dehalococcoides mccartyi_B	1	1341890	0	0	0	0	96.55	100	97.24
GCA_000341695.1_ASM34169v1_genomic	>90% completeness AND <5% contamination	Genbank	d__Bacteria;p__Chloroflexota;c__Dehalococcoidia;o__Dehalococcoidales;f__Dehalococcoidaceae;g__Dehalococcoides;s__Dehalococcoides mccartyi_B	1	1452340	0	0	0	0	96.55	100	97.24
GCA_001547795.1_ASM154779v1_genomic	>90% completeness AND <5% contamination	Genbank	d__Bacteria;p__Chloroflexota;c__Dehalococcoidia;o__Dehalococcoidales;f__Dehalococcoidaceae;g__Dehalococcoides;s__Dehalococcoides mccartyi_B	1	1451060	0	0	0	0	96.55	100	97.24
GCA_002835915.1_ASM283591v1_genomic	>90% completeness AND <5% contamination	Genbank	d__Bacteria;p__Chloroflexota;c__Dehalococcoidia;o__Dehalococcoidales;f__Dehalococcoidaceae;g__Dehalococcoides;s__Dehalococcoides mccartyi_B	403	1354820	0.872441	5.2	50	2.6	96.55	65	90.24
GCA_001466665.1_ASM146666v1_genomic	>90% completeness AND <5% contamination	Genbank	d__Bacteria;p__Chloroflexota;c__Dehalococcoidia;o__Dehalococcoidales;f__Dehalococcoidaceae;g__Dehalogenimonas;s__Dehalogenimonas alkenigignens	1	1851580	0	0	0	0	94.83	100	95.864
1.8398e+06	>90% completeness AND <5% contamination	PATRIC	d__Bacteria;p__Chloroflexota;c__Dehalococcoidia;o__Dehalococcoidales;f__Dehalococcoidaceae;g__Dehalogenimonas;s__Dehalogenimonas formicexedens	1	2092790	0	0	0	0	95.69	100	96.552
GCA_000143165.1_ASM14316v1_genomic	>90% completeness AND <5% contamination	Genbank	d__Bacteria;p__Chloroflexota;c__Dehalococcoidia;o__Dehalococcoidales;f__Dehalococcoidaceae;g__Dehalogenimonas;s__Dehalogenimonas lykanthroporepellens	1	1686510	0	0	0	0	95.53	100	96.424
GCA_001005265.1_ASM100526v1_genomic	>90% completeness AND <5% contamination	Genbank	d__Bacteria;p__Chloroflexota;c__Dehalococcoidia;o__Dehalococcoidales;f__Dehalococcoidaceae;g__Dehalogenimonas;s__Dehalogenimonas sp001005265	1	1725730	0	0	0	0	97.26	100	97.808
GCA_014672715.2_ASM1467271v2_genomic	>90% completeness AND <5% contamination	Genbank	d__Bacteria;p__Chloroflexota;c__Dehalococcoidia;o__Dehalococcoidales;f__Dehalococcoidaceae;g__Dehalogenimonas;s__Dehalogenimonas sp002878295	1	2.06832e+06	0	0	0	0	95.69	100	96.552
GCA_002382615.1_ASM238261v1_genomic	>90% completeness AND <5% contamination	Genbank	d__Bacteria;p__Chloroflexota;c__Dehalococcoidia;o__Dehalococcoidales;f__Dehalococcoidaceae;g__UBA4087;s__UBA4087 sp002382615	29	962250	0	1.72	0	1.72	93.97	95	94.176
GCA_016783135.1_ASM1678313v1_genomic	>90% completeness AND <5% contamination	Genbank	d__Bacteria;p__Chloroflexota;c__Dehalococcoidia;o__Dehalococcoidales;f__Fen-1064;g__DUES01;s__	87	2284910	0	0	0	0	88.79	95	90.032
GCA_003161995.1_20100900_E3D_genomic	>90% completeness AND <5% contamination	Genbank	d__Bacteria;p__Chloroflexota;c__Dehalococcoidia;o__Dehalococcoidales;f__Fen-1064;g__Fen-1064;s__Fen-1064 sp003162335	184	2919840	0	0	0	0	94.44	80	91.552
GCA_903916765.1_freshwater_MAG_---_AlinenSediments_bin-3940_genomic	>90% completeness AND <5% contamination	Genbank	d__Bacteria;p__Chloroflexota;c__Dehalococcoidia;o__Dehalococcoidales;f__Fen-1064;g__Fen-1064;s__Fen-1064 sp903916765	149	1366630	0	1.72	0	1.72	93.97	85	92.176
GCA_020342155.1_ASM2034215v1_genomic	>90% completeness AND <5% contamination	Genbank	d__Bacteria;p__Chloroflexota;c__Dehalococcoidia;o__Dehalococcoidales;f__Fen-1064;g__W589;s__	1	2295990	0	0	0	0	92.24	95	92.792
GCA_011170375.1_ASM1117037v1_genomic	>90% completeness AND <5% contamination	Genbank	d__Bacteria;p__Chloroflexota;c__Dehalococcoidia;o__Dehalococcoidales;f__Fen-1064;g__W589;s__W589 sp011170375	17	2277950	0	0	0	0	93.97	95	94.176
GCA_011171075.1_ASM1117107v1_genomic	>90% completeness AND <5% contamination	Genbank	d__Bacteria;p__Chloroflexota;c__Dehalococcoidia;o__Dehalococcoidales;f__Fen-1064;g__W589;s__W589 sp011171075	53	2136110	0	0	0	0	92.24	95	92.792
3300017449_15	>90% completeness AND <5% contamination	Nayfach et al.	d__Bacteria;p__Chloroflexota;c__Dehalococcoidia;o__Dehalococcoidales;f__RBG-16-60-22;g__;s__	92	1585790	0	1.72	0	1.72	92.08	90	91.664
3300027051_22	>90% completeness AND <5% contamination	Nayfach et al.	d__Bacteria;p__Chloroflexota;c__Dehalococcoidia;o__Dehalococcoidales;f__RBG-16-60-22;g__;s__	28	2.09636e+06	3.19458	0	0	0	92.08	100	93.664
GCA_003141235.1_20120800_E3X_genomic	>90% completeness AND <5% contamination	Genbank	d__Bacteria;p__Chloroflexota;c__Dehalococcoidia;o__Dehalococcoidales;f__RBG-16-60-22;g__Fen-1077;s__Fen-1077 sp003141235	122	2151310	0	3.45	0	3.45	95.38	95	95.304
GCA_016930185.1_ASM1693018v1_genomic	>90% completeness AND <5% contamination	Genbank	d__Bacteria;p__Chloroflexota;c__Dehalococcoidia;o__Dehalococcoidales;f__RBG-16-60-22;g__RBG-13-51-18;s__	104	1812420	0	1.1	85.71	0.15719	93.81	90	93.048
GCA_020353235.1_ASM2035323v1_genomic	>90% completeness AND <5% contamination	Genbank	d__Bacteria;p__Chloroflexota;c__Dehalococcoidia;o__Dehalococcoidales;f__SOJS01;g__;s__	1	1121940	0	0	0	0	89.66	95	90.728
GCA_903852935.1_freshwater_MAG_---_KR4_bin-1018_genomic	>90% completeness AND <5% contamination	Genbank	d__Bacteria;p__Chloroflexota;c__Dehalococcoidia;o__Dehalococcoidales;f__UBA1222;g__SURF-27;s__SURF-27 sp903844845	29	1890550	1.64978	0.16	0	0.16	95.69	100	96.552
GCA_903883385.1_freshwater_MAG_---_AM-lipid-02-D10_bin-0549_genomic	>90% completeness AND <5% contamination	Genbank	d__Bacteria;p__Chloroflexota;c__Dehalococcoidia;o__Dehalococcoidales;f__UBA1222;g__SURF-27;s__SURF-27 sp903844845	330	1748910	3.09907	1.72	100	0	91.38	100	93.104
GCA_903901135.1_freshwater_MAG_---_MJ-2014_bin-0279_genomic	>90% completeness AND <5% contamination	Genbank	d__Bacteria;p__Chloroflexota;c__Dehalococcoidia;o__Dehalococcoidales;f__UBA1222;g__SURF-27;s__SURF-27 sp903844845	235	1925390	3.68341	3.45	50	1.725	95.69	95	95.552
GCA_903911445.1_freshwater_MAG_---_AM-lipid-02-D9_bin-0609_genomic	>90% completeness AND <5% contamination	Genbank	d__Bacteria;p__Chloroflexota;c__Dehalococcoidia;o__Dehalococcoidales;f__UBA1222;g__SURF-27;s__SURF-27 sp903844845	242	2002640	2.47224	3.45	50	1.725	92.24	90	91.792
GCA_016284035.1_ASM1628403v1_genomic	>90% completeness AND <5% contamination	Genbank	d__Bacteria;p__Chloroflexota;c__Dehalococcoidia;o__Dehalococcoidales;f__UBA1222;g__UBA1222;s__	142	1323480	0	0	0	0	93.97	100	95.176
GCA_016286345.1_ASM1628634v1_genomic	>90% completeness AND <5% contamination	Genbank	d__Bacteria;p__Chloroflexota;c__Dehalococcoidia;o__Dehalococcoidales;f__UBA1222;g__UBA1222;s__	115	1463960	0	0	0	0	94.83	100	95.864
3300017429_13	>90% completeness AND <5% contamination	Nayfach et al.	d__Bacteria;p__Chloroflexota;c__Dehalococcoidia;o__Dehalococcoidales;f__UBA2162;g__;s__	155	2.0847e+06	2.42145	1.72	33.33	1.14672	87.85	100	90.28
3300027819_59	>90% completeness AND <5% contamination	Nayfach et al.	d__Bacteria;p__Chloroflexota;c__Dehalococcoidia;o__Dehalococcoidales;f__UBA2162;g__;s__	20	2320870	0	0	0	0	93.97	100	95.176
GCA_016183485.1_ASM1618348v1_genomic	>90% completeness AND <5% contamination	Genbank	d__Bacteria;p__Chloroflexota;c__Dehalococcoidia;o__Dehalococcoidales;f__UBA2162;g__;s__	219	1616310	1.17985	4.31	100	0	89.66	95	90.728
GCA_011191975.1_ASM1119197v1_genomic	>90% completeness AND <5% contamination	Genbank	d__Bacteria;p__Chloroflexota;c__Dehalococcoidia;o__Dehalococcoidales;f__UBA2162;g__MGML01;s__MGML01 sp011191975	164	3330830	0	0	0	0	88.79	95	90.032
3300020423_58	>90% completeness AND <5% contamination	Nayfach et al.	d__Bacteria;p__Chloroflexota;c__Dehalococcoidia;o__Dehalococcoidales;f__UBA2162;g__UBA2162;s__UBA2162 sp002335405	36	992190	0	0.57	100	0	92.24	95	92.792
GCA_002730395.1_ASM273039v1_genomic	>90% completeness AND <5% contamination	Genbank	d__Bacteria;p__Chloroflexota;c__Dehalococcoidia;o__Dehalococcoidales;f__UBA2162;g__UBA2162;s__UBA2162 sp002335405	107	2194160	0.544172	0	0	0	90.52	100	92.416
3300013137_80	>90% completeness AND <5% contamination	Nayfach et al.	d__Bacteria;p__Chloroflexota;c__Dehalococcoidia;o__Dehalococcoidales;f__UBA3254;g__;s__	23	1865220	0	0	0	0	97.41	100	97.928
3300027896_43	>90% completeness AND <5% contamination	Nayfach et al.	d__Bacteria;p__Chloroflexota;c__Dehalococcoidia;o__Dehalococcoidales;f__UBA3254;g__;s__	129	3033580	0	0	0	0	92.24	100	93.792
GCA_016210585.1_ASM1621058v1_genomic	>90% completeness AND <5% contamination	Genbank	d__Bacteria;p__Chloroflexota;c__Dehalococcoidia;o__Dehalococcoidales;f__UBA3254;g__;s__	254	2792140	3.18071	3.45	0	3.45	95.53	75	91.424
GCA_016927955.1_ASM1692795v1_genomic	>90% completeness AND <5% contamination	Genbank	d__Bacteria;p__Chloroflexota;c__Dehalococcoidia;o__Dehalococcoidales;f__UBA3254;g__;s__	177	2293640	0	6.03	25	4.5225	93.81	85	92.048
3300009503_98	>90% completeness AND <5% contamination	Nayfach et al.	d__Bacteria;p__Chloroflexota;c__Dehalococcoidia;o__Dehalococcoidales;f__UBA3254;g__UBA3254;s__	156	2305540	0	1.72	100	0	96.55	95	96.24
3300029442_11	>90% completeness AND <5% contamination	Nayfach et al.	d__Bacteria;p__Chloroflexota;c__Dehalococcoidia;o__Dehalococcoidales;f__UBA3254;g__UBA3254;s__	164	2594470	0	1.72	0	1.72	97.41	95	96.928
GCA_016926695.1_ASM1692669v1_genomic	>90% completeness AND <5% contamination	Genbank	d__Bacteria;p__Chloroflexota;c__Dehalococcoidia;o__Dehalococcoidales;f__UBA3254;g__UBA3254;s__	189	4489830	0	3.45	0	3.45	97.41	95	96.928
GCA_011328975.1_ASM1132897v1_genomic	>90% completeness AND <5% contamination	Genbank	d__Bacteria;p__Chloroflexota;c__Dehalococcoidia;o__Dehalococcoidales;f__UBA3254;g__UBA3254;s__UBA3254 sp011328975	205	2470560	0	1.72	0	1.72	95.69	100	96.552
3300002462_35	>90% completeness AND <5% contamination	Nayfach et al.	d__Bacteria;p__Chloroflexota;c__Dehalococcoidia;o__Dehalococcoidales;f__UBA5627;g__;s__	93	1272380	4.16699	0.16	100	0	87.93	100	90.344
3300027592_58	>90% completeness AND <5% contamination	Nayfach et al.	d__Bacteria;p__Chloroflexota;c__Dehalococcoidia;o__Dehalococcoidales;f__UBA5627;g__;s__	15	1666980	0.727663	0	0	0	92.08	95	92.664
3300028603_106	>90% completeness AND <5% contamination	Nayfach et al.	d__Bacteria;p__Chloroflexota;c__Dehalococcoidia;o__Dehalococcoidales;f__UBA5627;g__UBA5627;s__	11	1198700	0	0	0	0	97.41	100	97.928
GCA_002419135.1_ASM241913v1_genomic	>90% completeness AND <5% contamination	Genbank	d__Bacteria;p__Chloroflexota;c__Dehalococcoidia;o__Dehalococcoidales;f__UBA5627;g__UBA5627;s__UBA5627 sp002419135	49	1308440	3.21528	0	0	0	91.38	100	93.104
GCA_012520835.1_ASM1252083v1_genomic	>90% completeness AND <5% contamination	Genbank	d__Bacteria;p__Chloroflexota;c__Dehalococcoidia;o__Dehalococcoidales;f__UBA5627;g__UBA5627;s__UBA5627 sp012520835	185	1270950	2.51465	2.19	75	0.5475	95.69	70	90.552
3300024262_27	>90% completeness AND <5% contamination	Nayfach et al.	d__Bacteria;p__Chloroflexota;c__Dehalococcoidia;o__Dehalococcoidales;f__UBA5760;g__;s__	69	1915940	0	0	0	0	95.69	95	95.552
3300028161_13	>90% completeness AND <5% contamination	Nayfach et al.	d__Bacteria;p__Chloroflexota;c__Dehalococcoidia;o__Dehalococcoidales;f__UBA5760;g__;s__	27	1370450	2.82389	3.45	0	3.45	95.69	100	96.552
GCA_021161775.1_ASM2116177v1_genomic	>90% completeness AND <5% contamination	Genbank	d__Bacteria;p__Chloroflexota;c__Dehalococcoidia;o__Dehalococcoidales;f__UBA5760;g__;s__	55	933880	0	1.72	100	0	93.97	100	95.176
GCA_002688105.1_ASM268810v1_genomic	>90% completeness AND <5% contamination	Genbank	d__Bacteria;p__Chloroflexota;c__Dehalococcoidia;o__Dehalococcoidales;f__UBA5760;g__GCA-2688105;s__GCA-2688105 sp002688105	46	1330180	1.82156	1.72	0	1.72	92.24	90	91.792
GCA_011192075.1_ASM1119207v1_genomic	>90% completeness AND <5% contamination	Genbank	d__Bacteria;p__Chloroflexota;c__Dehalococcoidia;o__Dehalococcoidales;f__UBA5760;g__S120;s__S120 sp011192075	187	1704640	2.13417	0.86	0	0.86	93.65	90	92.92
GCA_011170285.1_ASM1117028v1_genomic	>90% completeness AND <5% contamination	Genbank	d__Bacteria;p__Chloroflexota;c__Dehalococcoidia;o__Dehalococcoidales;f__UBA5760;g__W498;s__W498 sp011170285	27	1382720	0	0	0	0	93.97	100	95.176
GCA_011191875.1_ASM1119187v1_genomic	>90% completeness AND <5% contamination	Genbank	d__Bacteria;p__Chloroflexota;c__Dehalococcoidia;o__Dehalococcoidales;f__UBA5760;g__W498;s__W498 sp011191875	37	1147110	0	0	0	0	90.52	90	90.416
GCA_011191985.1_ASM1119198v1_genomic	>90% completeness AND <5% contamination	Genbank	d__Bacteria;p__Chloroflexota;c__Dehalococcoidia;o__Dehalococcoidales;f__W111;g__W111;s__W111 sp011191985	97	2016090	0	0.16	0	0.16	97.41	85	94.928
GCA_011057325.1_ASM1105732v1_genomic	>90% completeness AND <5% contamination	Genbank	d__Bacteria;p__Chloroflexota;c__Dehalococcoidia;o__DSGV01;f__DSGV01;g__DSGV01;s__DSGV01 sp011057325	33	3944890	0	1.72	0	1.72	97.41	100	97.928
GCA_015478665.1_ASM1547866v1_genomic	>90% completeness AND <5% contamination	Genbank	d__Bacteria;p__Chloroflexota;c__Dehalococcoidia;o__DSTF01;f__;g__;s__	66	2666680	0	0	0	0	93.97	95	94.176
GCA_003228685.1_ASM322868v1_genomic	>90% completeness AND <5% contamination	Genbank	d__Bacteria;p__Chloroflexota;c__Dehalococcoidia;o__DSTF01;f__RBG-16-68-14;g__SZUA-185;s__SZUA-185 sp003228685	128	3530350	0	2.59	100	0	93.81	100	95.048
GCA_009377745.1_ASM937774v1_genomic	>90% completeness AND <5% contamination	Genbank	d__Bacteria;p__Chloroflexota;c__Dehalococcoidia;o__DSTF01;f__WHTK01;g__WHTK01;s__WHTK01 sp009377745	73	3534090	0	0.16	100	0	92.24	100	93.792
GCA_004297765.1_ASM429776v1_genomic	>90% completeness AND <5% contamination	Genbank	d__Bacteria;p__Chloroflexota;c__Dehalococcoidia;o__FW602-bin16;f__FW602-bin16;g__FW602-bin16;s__FW602-bin16 sp004297765	256	5636240	0	0	0	0	96.55	100	97.24
GCA_002717565.1_ASM271756v1_genomic	>90% completeness AND <5% contamination	Genbank	d__Bacteria;p__Chloroflexota;c__Dehalococcoidia;o__GCA-2717565;f__GCA-2717565;g__GCA-2717565;s__GCA-2717565 sp002717565	32	1683530	0	2.98	0	2.98	93.1	100	94.48
GCA_913052065.1_ERR599156_bin.57_MetaBAT_v2.12.1_MAG_genomic	>90% completeness AND <5% contamination	Genbank	d__Bacteria;p__Chloroflexota;c__Dehalococcoidia;o__GCA-2717565;f__GCA-2717565;g__GCA-2717565;s__GCA-2717565 sp002717565	41	1497770	0	1.72	0	1.72	93.1	95	93.48
GCA_009692865.1_ASM969286v1_genomic	>90% completeness AND <5% contamination	Genbank	d__Bacteria;p__Chloroflexota;c__Dehalococcoidia;o__GCA-2717565;f__GCA-2717565;g__SHYH01;s__SHYH01 sp009692865	75	1411010	0	0.86	100	0	90.99	100	92.792
3300017449_14	>90% completeness AND <5% contamination	Nayfach et al.	d__Bacteria;p__Chloroflexota;c__Dehalococcoidia;o__GIF9;f__;g__;s__	168	1644350	0	0	0	0	89.66	95	90.728
3300027819_31	>90% completeness AND <5% contamination	Nayfach et al.	d__Bacteria;p__Chloroflexota;c__Dehalococcoidia;o__GIF9;f__;g__;s__	247	4034920	0	1.72	0	1.72	95.69	100	96.552
3300029893_16	>90% completeness AND <5% contamination	Nayfach et al.	d__Bacteria;p__Chloroflexota;c__Dehalococcoidia;o__GIF9;f__;g__;s__	22	1345670	0	0	0	0	90.52	100	92.416
GCA_021162245.1_ASM2116224v1_genomic	>90% completeness AND <5% contamination	Genbank	d__Bacteria;p__Chloroflexota;c__Dehalococcoidia;o__GIF9;f__AB-539-J10;g__;s__	132	1489750	0	0.86	0	0.86	90.52	90	90.416
GCA_021160725.1_ASM2116072v1_genomic	>90% completeness AND <5% contamination	Genbank	d__Bacteria;p__Chloroflexota;c__Dehalococcoidia;o__GIF9;f__AB-539-J10;g__B68-G16;s__	104	1451420	0	0.86	0	0.86	92.24	95	92.792
GCA_021162545.1_ASM2116254v1_genomic	>90% completeness AND <5% contamination	Genbank	d__Bacteria;p__Chloroflexota;c__Dehalococcoidia;o__GIF9;f__AB-539-J10;g__CG2-30-46-9;s__	67	1388430	0	1.72	50	0.86	93.97	100	95.176
GCA_003567995.1_ASM356799v1_genomic	>90% completeness AND <5% contamination	Genbank	d__Bacteria;p__Chloroflexota;c__Dehalococcoidia;o__GIF9;f__AB-539-J10;g__E29-bin54;s__E29-bin54 sp003556385	144	1869430	0	1.72	100	0	95.69	100	96.552
GCA_013388845.1_ASM1338884v1_genomic	>90% completeness AND <5% contamination	Genbank	d__Bacteria;p__Chloroflexota;c__Dehalococcoidia;o__GIF9;f__AB-539-J10;g__JACAEN01;s__JACAEN01 sp013388845	52	1377640	0	2.59	0	2.59	95.69	90	94.552
3300017419_30	>90% completeness AND <5% contamination	Nayfach et al.	d__Bacteria;p__Chloroflexota;c__Dehalococcoidia;o__GIF9;f__AB-539-J10;g__RBG-13-51-36;s__	42	1339500	0	0.86	0	0.86	92.24	100	93.792
3300017431_37	>90% completeness AND <5% contamination	Nayfach et al.	d__Bacteria;p__Chloroflexota;c__Dehalococcoidia;o__GIF9;f__AB-539-J10;g__RBG-13-51-36;s__	233	1652960	0	5.17	75	1.2925	88.79	95	90.032
3300017431_42	>90% completeness AND <5% contamination	Nayfach et al.	d__Bacteria;p__Chloroflexota;c__Dehalococcoidia;o__GIF9;f__AB-539-J10;g__RBG-13-51-36;s__	148	1470850	0	1.72	0	1.72	92.24	90	91.792
3300024353_49	>90% completeness AND <5% contamination	Nayfach et al.	d__Bacteria;p__Chloroflexota;c__Dehalococcoidia;o__GIF9;f__AB-539-J10;g__RBG-13-51-36;s__	35	1661030	0	0.86	0	0.86	94.83	100	95.864
3300027690_70	>90% completeness AND <5% contamination	Nayfach et al.	d__Bacteria;p__Chloroflexota;c__Dehalococcoidia;o__GIF9;f__AB-539-J10;g__RBG-13-51-36;s__	167	1761890	0	2.74	33.33	1.82676	90.52	100	92.416
3300027814_16	>90% completeness AND <5% contamination	Nayfach et al.	d__Bacteria;p__Chloroflexota;c__Dehalococcoidia;o__GIF9;f__AB-539-J10;g__RBG-13-51-36;s__	220	1544500	0	2.59	0	2.59	89.66	100	91.728
3300027863_158	>90% completeness AND <5% contamination	Nayfach et al.	d__Bacteria;p__Chloroflexota;c__Dehalococcoidia;o__GIF9;f__AB-539-J10;g__RBG-13-51-36;s__	4	1666540	0	0.86	0	0.86	93.97	100	95.176
GCA_001796515.1_ASM179651v1_genomic	>90% completeness AND <5% contamination	Genbank	d__Bacteria;p__Chloroflexota;c__Dehalococcoidia;o__GIF9;f__AB-539-J10;g__RBG-13-51-36;s__RBG-13-51-36 sp001796515	57	1934180	0	2.59	0	2.59	92.24	95	92.792
GCA_903884455.1_freshwater_MAG_---_AlinenSedimentsD2_bin-0330_genomic	>90% completeness AND <5% contamination	Genbank	d__Bacteria;p__Chloroflexota;c__Dehalococcoidia;o__GIF9;f__AB-539-J10;g__RBG-13-51-36;s__RBG-13-51-36 sp903884455	63	1555600	0	2.59	0	2.59	95.69	100	96.552
GCA_003562475.1_ASM356247v1_genomic	>90% completeness AND <5% contamination	Genbank	d__Bacteria;p__Chloroflexota;c__Dehalococcoidia;o__GIF9;f__AB-539-J10;g__SKVJ01;s__SKVJ01 sp003562475	133	2457240	0.841188	0.86	0	0.86	89.66	100	91.728
GCA_003563175.1_ASM356317v1_genomic	>90% completeness AND <5% contamination	Genbank	d__Bacteria;p__Chloroflexota;c__Dehalococcoidia;o__GIF9;f__AB-539-J10;g__SKVJ01;s__SKVJ01 sp007129495	110	2251120	2.52807	0.86	0	0.86	90.52	100	92.416
GCA_002440925.1_ASM244092v1_genomic	>90% completeness AND <5% contamination	Genbank	d__Bacteria;p__Chloroflexota;c__Dehalococcoidia;o__GIF9;f__AB-539-J10;g__UBA6803;s__UBA6803 sp002452795	37	901320	0	0	0	0	93.97	90	93.176
3300024333_14	>90% completeness AND <5% contamination	Nayfach et al.	d__Bacteria;p__Chloroflexota;c__Dehalococcoidia;o__GIF9;f__UBA5620;g__9FT-COMBO-48-23;s__	130	1755890	0	0	0	0	92.24	100	93.792
GCA_016865855.1_JGI_2017-08-21_genomic	>90% completeness AND <5% contamination	Genbank	d__Bacteria;p__Chloroflexota;c__Dehalococcoidia;o__GIF9;f__UBA5620;g__9FT-COMBO-48-23;s__	84	2007610	0	1.72	0	1.72	92.24	90	91.792
GCA_016865895.1_JGI_2017-08-21_genomic	>90% completeness AND <5% contamination	Genbank	d__Bacteria;p__Chloroflexota;c__Dehalococcoidia;o__GIF9;f__UBA5620;g__9FT-COMBO-48-23;s__	306	2611450	0	8.62	60	3.448	91.38	100	93.104
GCA_016875875.1_JGI_2017-08-21_genomic	>90% completeness AND <5% contamination	Genbank	d__Bacteria;p__Chloroflexota;c__Dehalococcoidia;o__GIF9;f__UBA5620;g__9FT-COMBO-48-23;s__	20	1967940	0	0	0	0	95.69	100	96.552
GCA_016930155.1_ASM1693015v1_genomic	>90% completeness AND <5% contamination	Genbank	d__Bacteria;p__Chloroflexota;c__Dehalococcoidia;o__GIF9;f__UBA5629;g__CAIMUM01;s__	131	2618860	0	0	0	0	95.69	95	95.552
GCA_903929005.1_freshwater_MAG_---_AlinenSedimentsD1_bin-0298_genomic	>90% completeness AND <5% contamination	Genbank	d__Bacteria;p__Chloroflexota;c__Dehalococcoidia;o__GIF9;f__UBA5629;g__CAIMUM01;s__CAIMUM01 sp903929005	296	2603260	0	5.64	28.57	4.02865	97.41	100	97.928
3300017498_17	>90% completeness AND <5% contamination	Nayfach et al.	d__Bacteria;p__Chloroflexota;c__Dehalococcoidia;o__GIF9;f__UBA5629;g__UBA1162;s__	46	1949250	0	0	0	0	97.41	100	97.928
3300028167_8	>90% completeness AND <5% contamination	Nayfach et al.	d__Bacteria;p__Chloroflexota;c__Dehalococcoidia;o__GIF9;f__UBA5629;g__UBA1162;s__	43	2337660	0	1.72	0	1.72	99.14	100	99.312
3300028178_12	>90% completeness AND <5% contamination	Nayfach et al.	d__Bacteria;p__Chloroflexota;c__Dehalococcoidia;o__GIF9;f__UBA5629;g__UBA1162;s__	156	2499730	0	1.72	100	0	97.41	90	95.928
3300025812_16	>90% completeness AND <5% contamination	Nayfach et al.	d__Bacteria;p__Chloroflexota;c__Dehalococcoidia;o__GIF9;f__UBA5629;g__UBA1162;s__UBA1162 sp002311135	13	2238270	0	0	0	0	99.14	100	99.312
GCA_003142375.1_20120800_E3S_genomic	>90% completeness AND <5% contamination	Genbank	d__Bacteria;p__Chloroflexota;c__Dehalococcoidia;o__GIF9;f__UBA5629;g__UBA1162;s__UBA1162 sp003142375	27	2137520	0	0	0	0	89.66	95	90.728
3300027819_40	>90% completeness AND <5% contamination	Nayfach et al.	d__Bacteria;p__Chloroflexota;c__Dehalococcoidia;o__JdFR-54;f__;g__;s__	51	3131440	0	0	0	0	97.41	100	97.928
GCA_016210545.1_ASM1621054v1_genomic	>90% completeness AND <5% contamination	Genbank	d__Bacteria;p__Chloroflexota;c__Dehalococcoidia;o__JdFR-54;f__;g__;s__	263	3344470	0	1.88	50	0.94	92.24	85	90.792
GCA_018825785.1_ASM1882578v1_genomic	>90% completeness AND <5% contamination	Genbank	d__Bacteria;p__Chloroflexota;c__Dehalococcoidia;o__JdFR-54;f__;g__;s__	60	1588070	0.260064	0	0	0	95.53	90	94.424
GCA_003228115.1_ASM322811v1_genomic	>90% completeness AND <5% contamination	Genbank	d__Bacteria;p__Chloroflexota;c__Dehalococcoidia;o__SAR202-VII-2;f__SAR202-VII-2;g__SAR202-VII-2;s__SAR202-VII-2 sp003228115	18	2777270	0	1.72	0	1.72	99.14	100	99.312
3300027839_47	>90% completeness AND <5% contamination	Nayfach et al.	d__Bacteria;p__Chloroflexota;c__Dehalococcoidia;o__SAR202;f__;g__;s__	154	2816520	0	0	0	0	97.41	100	97.928
GCA_902560345.1_AG-404-A02_genomic	>90% completeness AND <5% contamination	Genbank	d__Bacteria;p__Chloroflexota;c__Dehalococcoidia;o__SAR202;f__GCA-002694895;g__GCA-002694895;s__GCA-002694895 sp002711005	23	1307620	0.169774	0	0	0	93.97	95	94.176
GCA_002721445.1_ASM272144v1_genomic	>90% completeness AND <5% contamination	Genbank	d__Bacteria;p__Chloroflexota;c__Dehalococcoidia;o__SAR202;f__GCA-002723415;g__GCA-002723415;s__GCA-002723415 sp002721445	18	1712150	0	0	0	0	97.41	100	97.928
GCA_002723415.1_ASM272341v1_genomic	>90% completeness AND <5% contamination	Genbank	d__Bacteria;p__Chloroflexota;c__Dehalococcoidia;o__SAR202;f__GCA-002723415;g__GCA-002723415;s__GCA-002723415 sp002723415	37	1860280	0	0	0	0	92.24	100	93.792
GCA_002719675.1_ASM271967v1_genomic	>90% completeness AND <5% contamination	Genbank	d__Bacteria;p__Chloroflexota;c__Dehalococcoidia;o__SAR202;f__GCA-2719675;g__GCA-2719675;s__GCA-2719675 sp002719675	19	1403380	0	0	0	0	90.67	90	90.536
GCA_009392295.1_ASM939229v1_genomic	>90% completeness AND <5% contamination	Genbank	d__Bacteria;p__Chloroflexota;c__Dehalococcoidia;o__SAR202;f__GCA-2719675;g__GCA-2719675;s__GCA-2719675 sp009392295	25	1447270	0	0	0	0	92.24	100	93.792
GCA_009392195.1_ASM939219v1_genomic	>90% completeness AND <5% contamination	Genbank	d__Bacteria;p__Chloroflexota;c__Dehalococcoidia;o__SAR202;f__OSU-TB39;g__OSU-TB39;s__OSU-TB39 sp009392195	67	2.05307e+06	0	1.72	0	1.72	97.41	100	97.928
GCA_002238855.1_ASM223885v1_genomic	>90% completeness AND <5% contamination	Genbank	d__Bacteria;p__Chloroflexota;c__Dehalococcoidia;o__SAR202;f__UBA11138;g__Bin90;s__Bin90 sp002238855	213	4606320	0	2.66	0	2.66	95.69	95	95.552
GCA_009840355.1_ASM984035v1_genomic	>90% completeness AND <5% contamination	Genbank	d__Bacteria;p__Chloroflexota;c__Dehalococcoidia;o__SAR202;f__UBA11138;g__Bin90;s__Bin90 sp009840355	57	3278740	0	2.51	0	2.51	97.41	100	97.928
3300027839_39	>90% completeness AND <5% contamination	Nayfach et al.	d__Bacteria;p__Chloroflexota;c__Dehalococcoidia;o__SAR202;f__UBA11138;g__Casp-Chloro-G4;s__	71	3135690	0	1.72	0	1.72	93.97	100	95.176
3300026087_6	>90% completeness AND <5% contamination	Nayfach et al.	d__Bacteria;p__Chloroflexota;c__Dehalococcoidia;o__SAR202;f__UBA11138;g__UBA1123;s__UBA1123 sp002313895	235	3714470	0	1.88	50	0.94	99.14	100	99.312
GCA_913020365.1_ERR599008_bin.71_MetaBAT_v2.12.1_MAG_genomic	>90% completeness AND <5% contamination	Genbank	d__Bacteria;p__Chloroflexota;c__Dehalococcoidia;o__SAR202;f__UBA11138;g__UBA1123;s__UBA1123 sp002313895	85	3605240	0	1.72	0	1.72	99.14	100	99.312
GCA_002686145.1_ASM268614v1_genomic	>90% completeness AND <5% contamination	Genbank	d__Bacteria;p__Chloroflexota;c__Dehalococcoidia;o__SAR202;f__UBA11138;g__UBA2160;s__UBA2160 sp002328865	124	3475450	0	3.45	0	3.45	91.38	90	91.104
GCA_009838465.1_ASM983846v1_genomic	>90% completeness AND <5% contamination	Genbank	d__Bacteria;p__Chloroflexota;c__Dehalococcoidia;o__SAR202;f__UBA11138;g__VXRN01;s__VXRN01 sp009838465	75	3550740	0	1.72	0	1.72	95.69	95	95.552
GCA_002699485.1_ASM269948v1_genomic	>90% completeness AND <5% contamination	Genbank	d__Bacteria;p__Chloroflexota;c__Dehalococcoidia;o__SAR202;f__UBA2962;g__UBA2962;s__UBA2962 sp002699485	61	1906460	0	0.86	0	0.86	94.75	100	95.8
GCA_913045155.1_ERR599100_bin.78_MetaBAT_v2.12.1_MAG_genomic	>90% completeness AND <5% contamination	Genbank	d__Bacteria;p__Chloroflexota;c__Dehalococcoidia;o__SAR202;f__UBA826;g__AG-426-M11;s__AG-426-M11 sp003213095	26	1342310	0	4.08	0	4.08	88.79	95	90.032
3300006315_3	>90% completeness AND <5% contamination	Nayfach et al.	d__Bacteria;p__Chloroflexota;c__Dehalococcoidia;o__SAR202;f__UBA826;g__GCA-002712965;s__	138	2074290	0	1.88	50	0.94	93.1	95	93.48
GCA_913041155.1_ERR599156_bin.70_MetaBAT_v2.12.1_MAG_genomic	>90% completeness AND <5% contamination	Genbank	d__Bacteria;p__Chloroflexota;c__Dehalococcoidia;o__SAR202;f__UBA826;g__GCA-002712965;s__GCA-002712965 sp009392815	61	2.07795e+06	0	3.45	0	3.45	94.83	80	91.864
GCA_002717465.1_ASM271746v1_genomic	>90% completeness AND <5% contamination	Genbank	d__Bacteria;p__Chloroflexota;c__Dehalococcoidia;o__SAR202;f__UBA826;g__GCA-2717465;s__GCA-2717465 sp002717465	35	1985280	0	3.45	100	0	93.97	90	93.176
GCA_913046305.1_ERR599072_bin.129_MetaBAT_v2.12.1_MAG_genomic	>90% completeness AND <5% contamination	Genbank	d__Bacteria;p__Chloroflexota;c__Dehalococcoidia;o__SAR202;f__UBA826;g__UBA11795;s__UBA11795 sp002708065	194	2736990	0	3.45	0	3.45	95.69	75	91.552
GCA_008373095.1_ASM837309v1_genomic	>90% completeness AND <5% contamination	Genbank	d__Bacteria;p__Chloroflexota;c__Dehalococcoidia;o__SAR202;f__UBA826;g__UBA11996;s__UBA11996 sp002320875	104	1951970	0	3.45	0	3.45	93.62	80	90.896
GCA_913020755.1_ERR599044_bin.70_MetaBAT_v2.12.1_MAG_genomic	>90% completeness AND <5% contamination	Genbank	d__Bacteria;p__Chloroflexota;c__Dehalococcoidia;o__SAR202;f__UBA826;g__UBA11996;s__UBA11996 sp002435305	288	2114710	0	3.76	75	0.94	95.69	85	93.552
3300027709_15	>90% completeness AND <5% contamination	Nayfach et al.	d__Bacteria;p__Chloroflexota;c__Dehalococcoidia;o__SAR202;f__UBA826;g__UBA11996;s__UBA11996 sp002500485	126	2332420	0	1.72	0	1.72	93.1	100	94.48
GCA_913030955.1_ERR598946_bin.32_MetaBAT_v2.12.1_MAG_genomic	>90% completeness AND <5% contamination	Genbank	d__Bacteria;p__Chloroflexota;c__Dehalococcoidia;o__SAR202;f__UBA826;g__UBA11996;s__UBA11996 sp002500485	50	2161470	0	1.72	0	1.72	93.1	95	93.48
GCA_913031505.1_ERR599097_bin.4_MetaBAT_v2.12.1_MAG_genomic	>90% completeness AND <5% contamination	Genbank	d__Bacteria;p__Chloroflexota;c__Dehalococcoidia;o__SAR202;f__UBA826;g__UBA11996;s__UBA11996 sp002728195	107	1904470	0	1.72	0	1.72	93.97	95	94.176
3300027847_53	>90% completeness AND <5% contamination	Nayfach et al.	d__Bacteria;p__Chloroflexota;c__Dehalococcoidia;o__SAR202;f__UBA826;g__UBA11996;s__UBA11996 sp003228105	27	1983780	0	1.72	0	1.72	94.83	100	95.864
GCA_913046145.1_ERR599008_bin.111_MetaBAT_v2.12.1_MAG_genomic	>90% completeness AND <5% contamination	Genbank	d__Bacteria;p__Chloroflexota;c__Dehalococcoidia;o__SAR202;f__UBA826;g__UBA11996;s__UBA11996 sp009392675	85	2203040	0	4.76	0	4.76	93.1	100	94.48
GCA_002295675.1_ASM229567v1_genomic	>90% completeness AND <5% contamination	Genbank	d__Bacteria;p__Chloroflexota;c__Dehalococcoidia;o__SAR202;f__UBA826;g__UBA826;s__UBA826 sp002718095	90	1735130	0	2.59	0	2.59	88.71	100	90.968
GCA_002707945.1_ASM270794v1_genomic	>90% completeness AND <5% contamination	Genbank	d__Bacteria;p__Chloroflexota;c__Dehalococcoidia;o__SAR202;f__UBA826;g__UBA826;s__UBA826 sp002718095	22	1424640	0	1.72	27.27	1.25096	95.53	95	95.424
GCA_002718095.1_ASM271809v1_genomic	>90% completeness AND <5% contamination	Genbank	d__Bacteria;p__Chloroflexota;c__Dehalococcoidia;o__SAR202;f__UBA826;g__UBA826;s__UBA826 sp002718095	10	1437640	0	0	0	0	93.97	95	94.176
GCA_016872355.1_JGI_2017-08-21_genomic	>90% completeness AND <5% contamination	Genbank	d__Bacteria;p__Chloroflexota;c__Dehalococcoidia;o__SAR202;f__VXLM01;g__;s__	133	3071570	0	0	0	0	99.14	100	99.312
GCA_016872515.1_JGI_2017-08-21_genomic	>90% completeness AND <5% contamination	Genbank	d__Bacteria;p__Chloroflexota;c__Dehalococcoidia;o__SAR202;f__VXLM01;g__;s__	91	2275330	0	0.86	0	0.86	97.26	100	97.808
GCA_913030785.1_ERR599008_bin.106_MetaBAT_v2.12.1_MAG_genomic	>90% completeness AND <5% contamination	Genbank	d__Bacteria;p__Chloroflexota;c__Dehalococcoidia;o__SAR202;f__VXLM01;g__;s__	422	3205750	0	2.93	0	2.93	96.55	70	91.24
GCA_009838445.1_ASM983844v1_genomic	>90% completeness AND <5% contamination	Genbank	d__Bacteria;p__Chloroflexota;c__Dehalococcoidia;o__SAR202;f__VXLM01;g__VXLM01;s__VXLM01 sp009841605	315	3306250	0	0.57	100	0	95.53	100	96.424
GCA_009840025.1_ASM984002v1_genomic	>90% completeness AND <5% contamination	Genbank	d__Bacteria;p__Chloroflexota;c__Dehalococcoidia;o__SAR202;f__VXLM01;g__VXLM01;s__VXLM01 sp009841605	145	3365590	0	0	0	0	93.97	100	95.176
GCA_009841605.1_ASM984160v1_genomic	>90% completeness AND <5% contamination	Genbank	d__Bacteria;p__Chloroflexota;c__Dehalococcoidia;o__SAR202;f__VXLM01;g__VXLM01;s__VXLM01 sp009841605	143	3226970	0.161452	1.72	100	0	97.41	100	97.928
GCA_009693015.1_ASM969301v1_genomic	>90% completeness AND <5% contamination	Genbank	d__Bacteria;p__Chloroflexota;c__Dehalococcoidia;o__SHYB01;f__SHYB01;g__SHYB01;s__SHYB01 sp009693015	60	1952790	0	1.72	0	1.72	97.41	95	96.928
GCA_011373495.1_ASM1137349v1_genomic	>90% completeness AND <5% contamination	Genbank	d__Bacteria;p__Chloroflexota;c__Dehalococcoidia;o__SM23-28-2;f__HRbin24;g__DRWY01;s__DRWY01 sp011373495	130	1590440	0	0	0	0	93.97	90	93.176
3300020139_32	>90% completeness AND <5% contamination	Nayfach et al.	d__Bacteria;p__Chloroflexota;c__Dehalococcoidia;o__SM23-28-2;f__HRbin24;g__HRBIN24;s__	48	1777800	0	0	0	0	93.97	100	95.176
3300025350_18	>90% completeness AND <5% contamination	Nayfach et al.	d__Bacteria;p__Chloroflexota;c__Dehalococcoidia;o__SM23-28-2;f__HRbin24;g__HRBIN24;s__	42	1726030	0	0	0	0	93.97	100	95.176
GCA_011054255.1_ASM1105425v1_genomic	>90% completeness AND <5% contamination	Genbank	d__Bacteria;p__Chloroflexota;c__Dehalococcoidia;o__SM23-28-2;f__HRbin24;g__HRBIN24;s__HRBIN24 sp002898715	37	2139490	0	0	0	0	99.14	100	99.312
GCA_011047455.1_ASM1104745v1_genomic	>90% completeness AND <5% contamination	Genbank	d__Bacteria;p__Chloroflexota;c__Dehalococcoidia;o__SM23-28-2;f__HRbin24;g__HRBIN24;s__HRBIN24 sp011047455	31	2283730	0	0	0	0	97.41	100	97.928
GCA_011380505.1_ASM1138050v1_genomic	>90% completeness AND <5% contamination	Genbank	d__Bacteria;p__Chloroflexota;c__Dehalococcoidia;o__SM23-28-2;f__HRbin24;g__HRBIN24;s__HRBIN24 sp011380505	293	1871100	0	0	0	0	94.67	95	94.736
GCA_011054135.1_ASM1105413v1_genomic	>90% completeness AND <5% contamination	Genbank	d__Bacteria;p__Chloroflexota;c__Dehalococcoidia;o__SM23-28-2;f__HRbin24;g__HRBIN25;s__HRBIN25 sp002898615	31	2485630	0.555191	0.86	0	0.86	97.41	95	96.928
GCA_016178045.1_ASM1617804v1_genomic	>90% completeness AND <5% contamination	Genbank	d__Bacteria;p__Chloroflexota;c__Dehalococcoidia;o__SM23-28-2;f__RBG-16-64-32;g__;s__	85	2026800	0	0	0	0	93.1	90	92.48
GCA_005882985.1_ASM588298v1_genomic	>90% completeness AND <5% contamination	Genbank	d__Bacteria;p__Chloroflexota;c__Dehalococcoidia;o__SM23-28-2;f__RBG-16-64-32;g__CF-163;s__CF-163 sp005882985	313	2619360	0	0	0	0	94.67	95	94.736
GCA_913056415.1_SRR5189789_bin.6_MetaBAT_v2.12.1_MAG_genomic	>90% completeness AND <5% contamination	Genbank	d__Bacteria;p__Chloroflexota;c__Dehalococcoidia;o__SM23-28-2;f__RBG-16-64-32;g__RBG-16-64-32;s__	340	2157830	0	0	0	0	91.38	100	93.104
GCA_020356025.1_ASM2035602v1_genomic	>90% completeness AND <5% contamination	Genbank	d__Bacteria;p__Chloroflexota;c__Dehalococcoidia;o__SM23-28-2;f__SM23-28-2;g__SM23-28-2;s__	1	2175160	0	0	0	0	94.83	95	94.864
GCA_009377715.1_ASM937771v1_genomic	>90% completeness AND <5% contamination	Genbank	d__Bacteria;p__Chloroflexota;c__Dehalococcoidia;o__SM23-28-2;f__WHTN01;g__WHTN01;s__WHTN01 sp009377715	109	2346460	0	0.16	100	0	92.76	90	92.208
GCA_011057285.1_ASM1105728v1_genomic	>90% completeness AND <5% contamination	Genbank	d__Bacteria;p__Chloroflexota;c__Dehalococcoidia;o__SpSt-223;f__SpSt-223;g__SpSt-223;s__SpSt-223 sp011053995	50	2804130	0	1.72	100	0	97.41	100	97.928
3300009503_97	>90% completeness AND <5% contamination	Nayfach et al.	d__Bacteria;p__Chloroflexota;c__Dehalococcoidia;o__SZUA-161;f__;g__;s__	66	2335230	0	0	0	0	90.52	100	92.416
3300017989_46	>90% completeness AND <5% contamination	Nayfach et al.	d__Bacteria;p__Chloroflexota;c__Dehalococcoidia;o__SZUA-161;f__;g__;s__	231	2545620	0	3.45	0	3.45	93.81	100	95.048
3300022225_35	>90% completeness AND <5% contamination	Nayfach et al.	d__Bacteria;p__Chloroflexota;c__Dehalococcoidia;o__SZUA-161;f__;g__;s__	34	1312470	0	0	0	0	97.41	100	97.928
3300022916_16	>90% completeness AND <5% contamination	Nayfach et al.	d__Bacteria;p__Chloroflexota;c__Dehalococcoidia;o__SZUA-161;f__;g__;s__	116	3307450	0	0	0	0	98.98	100	99.184
GCA_004377275.1_ASM437727v1_genomic	>90% completeness AND <5% contamination	Genbank	d__Bacteria;p__Chloroflexota;c__Dehalococcoidia;o__SZUA-161;f__E44-bin15;g__E29-bin15;s__E29-bin15 sp004377275	219	1487220	0	0	0	0	92.95	85	91.36
GCA_004376075.1_ASM437607v1_genomic	>90% completeness AND <5% contamination	Genbank	d__Bacteria;p__Chloroflexota;c__Dehalococcoidia;o__SZUA-161;f__E44-bin15;g__E44-bin26;s__E44-bin26 sp004376075	133	1261340	0	3.45	0	3.45	92.99	95	93.392
GCA_012974295.1_ASM1297429v1_genomic	>90% completeness AND <5% contamination	Genbank	d__Bacteria;p__Chloroflexota;c__Dehalococcoidia;o__SZUA-161;f__E44-bin15;g__JAAXQM01;s__JAAXQM01 sp012974295	297	1836440	0	1.72	100	0	95.69	75	91.552
GCA_018648325.1_ASM1864832v1_genomic	>90% completeness AND <5% contamination	Genbank	d__Bacteria;p__Chloroflexota;c__Dehalococcoidia;o__SZUA-161;f__SpSt-899;g__;s__	19	1999640	0	0	0	0	97.26	100	97.808
GCA_018725405.1_ASM1872540v1_genomic	>90% completeness AND <5% contamination	Genbank	d__Bacteria;p__Chloroflexota;c__Dehalococcoidia;o__SZUA-161;f__SpSt-899;g__;s__	486	2507200	0	6.38	33.33	4.25355	91.22	100	92.976
GCA_013203045.1_ASM1320304v1_genomic	>90% completeness AND <5% contamination	Genbank	d__Bacteria;p__Chloroflexota;c__Dehalococcoidia;o__SZUA-161;f__SpSt-899;g__JABMQN01;s__JABMQN01 sp013203045	277	3967810	0	0	0	0	99.14	85	96.312
GCA_014859215.1_ASM1485921v1_genomic	>90% completeness AND <5% contamination	Genbank	d__Bacteria;p__Chloroflexota;c__Dehalococcoidia;o__SZUA-161;f__SZUA-161;g__;s__	303	2502610	0	3.45	50	1.725	95.69	70	90.552
GCA_014874385.1_ASM1487438v1_genomic	>90% completeness AND <5% contamination	Genbank	d__Bacteria;p__Chloroflexota;c__Dehalococcoidia;o__SZUA-161;f__SZUA-161;g__;s__	118	2801470	0	3.76	0	3.76	99.14	100	99.312
GCA_016865955.1_JGI_2017-08-21_genomic	>90% completeness AND <5% contamination	Genbank	d__Bacteria;p__Chloroflexota;c__Dehalococcoidia;o__SZUA-161;f__SZUA-161;g__;s__	345	2436820	0	0.16	0	0.16	90.52	95	91.416
GCA_011174795.1_ASM1117479v1_genomic	>90% completeness AND <5% contamination	Genbank	d__Bacteria;p__Chloroflexota;c__Dehalococcoidia;o__SZUA-161;f__SZUA-161;g__W281;s__W281 sp011174795	76	1812090	0	0	0	0	96.55	100	97.24
GCA_016179845.1_ASM1617984v1_genomic	>90% completeness AND <5% contamination	Genbank	d__Bacteria;p__Chloroflexota;c__Dehalococcoidia;o__UBA1127;f__;g__;s__	57	1904340	0	0	0	0	94.83	95	94.864
3300005858_26	>90% completeness AND <5% contamination	Nayfach et al.	d__Bacteria;p__Chloroflexota;c__Dehalococcoidia;o__UBA1127;f__HRBIN23;g__HRBIN23;s__	43	1547940	0	0	0	0	99.14	100	99.312
GCA_009692665.1_ASM969266v1_genomic	>90% completeness AND <5% contamination	Genbank	d__Bacteria;p__Chloroflexota;c__Dehalococcoidia;o__UBA1127;f__SHYT01;g__SHYT01;s__SHYT01 sp009692665	31	1578490	0	1.72	0	1.72	93.1	100	94.48
GCA_913049785.1_ERR599008_bin.23_MetaBAT_v2.12.1_MAG_genomic	>90% completeness AND <5% contamination	Genbank	d__Bacteria;p__Chloroflexota;c__Dehalococcoidia;o__UBA1127;f__UBA1127;g__UBA1127;s__UBA1127 sp002311595	77	2153550	0	0.16	0	0.16	96.55	100	97.24
3300019487_22	>90% completeness AND <5% contamination	Nayfach et al.	d__Bacteria;p__Chloroflexota;c__Dehalococcoidia;o__UBA1151;f__;g__;s__	61	2991930	0	1.72	0	1.72	99.14	100	99.312
3300023176_30	>90% completeness AND <5% contamination	Nayfach et al.	d__Bacteria;p__Chloroflexota;c__Dehalococcoidia;o__UBA1151;f__Bin127;g__;s__	49	2113950	0	0	0	0	97.41	100	97.928
3300027847_33	>90% completeness AND <5% contamination	Nayfach et al.	d__Bacteria;p__Chloroflexota;c__Dehalococcoidia;o__UBA1151;f__Bin127;g__;s__	117	2750680	0	3.45	0	3.45	99.14	95	98.312
GCA_002239045.1_ASM223904v1_genomic	>90% completeness AND <5% contamination	Genbank	d__Bacteria;p__Chloroflexota;c__Dehalococcoidia;o__UBA1151;f__Bin127;g__Bin127;s__Bin127 sp002239045	21	3017770	2.96809	0	0	0	98.79	100	99.032
GCA_009838175.1_ASM983817v1_genomic	>90% completeness AND <5% contamination	Genbank	d__Bacteria;p__Chloroflexota;c__Dehalococcoidia;o__UBA1151;f__Bin127;g__Bin127;s__Bin127 sp009838175	66	2635460	0	0	0	0	98.28	100	98.624
2.02673e+06	>90% completeness AND <5% contamination	PATRIC	d__Bacteria;p__Chloroflexota;c__Dehalococcoidia;o__UBA1151;f__Bin127;g__Bin127;s__Bin127 sp012270805	469	2532610	0	6.11	21.74	4.78169	91.38	100	93.104
GCA_002712125.1_ASM271212v1_genomic	>90% completeness AND <5% contamination	Genbank	d__Bacteria;p__Chloroflexota;c__Dehalococcoidia;o__UBA1151;f__Bin127;g__GCA-002708145;s__GCA-002708145 sp002712125	34	1355490	0	1.72	0	1.72	95.69	85	93.552
GCA_002714425.1_ASM271442v1_genomic	>90% completeness AND <5% contamination	Genbank	d__Bacteria;p__Chloroflexota;c__Dehalococcoidia;o__UBA1151;f__Bin127;g__GCA-002708145;s__GCA-002708145 sp002714425	18	1395100	0	1.72	0	1.72	97.41	100	97.928
GCA_002701805.1_ASM270180v1_genomic	>90% completeness AND <5% contamination	Genbank	d__Bacteria;p__Chloroflexota;c__Dehalococcoidia;o__UBA1151;f__Bin127;g__GCA-002708145;s__GCA-002708145 sp002728715	22	1342870	0	3.45	100	0	88.79	95	90.032
GCA_009392215.1_ASM939221v1_genomic	>90% completeness AND <5% contamination	Genbank	d__Bacteria;p__Chloroflexota;c__Dehalococcoidia;o__UBA1151;f__Bin127;g__GCA-002725925;s__GCA-002725925 sp009392215	69	1809450	0	0	0	0	88.79	100	91.032
GCA_009391415.1_ASM939141v1_genomic	>90% completeness AND <5% contamination	Genbank	d__Bacteria;p__Chloroflexota;c__Dehalococcoidia;o__UBA1151;f__Bin127;g__GCA-002725925;s__GCA-002725925 sp009392785	121	2275240	0	0	0	0	93.97	85	92.176
GCA_018650845.1_ASM1865084v1_genomic	>90% completeness AND <5% contamination	Genbank	d__Bacteria;p__Chloroflexota;c__Dehalococcoidia;o__UBA1151;f__Bin127;g__UBA1328;s__	24	2477300	0	0	0	0	94.83	80	91.864
GCA_018673955.1_ASM1867395v1_genomic	>90% completeness AND <5% contamination	Genbank	d__Bacteria;p__Chloroflexota;c__Dehalococcoidia;o__UBA1151;f__Bin127;g__UBA1328;s__	103	2208530	0	0	0	0	93.97	90	93.176
GCA_012959765.1_ASM1295976v1_genomic	>90% completeness AND <5% contamination	Genbank	d__Bacteria;p__Chloroflexota;c__Dehalococcoidia;o__UBA1151;f__Bin127;g__UBA1328;s__UBA1328 sp012959765	49	2626510	0	0	0	0	99.14	90	97.312
GCA_013204545.1_ASM1320454v1_genomic	>90% completeness AND <5% contamination	Genbank	d__Bacteria;p__Chloroflexota;c__Dehalococcoidia;o__UBA1151;f__Bin127;g__UBA1328;s__UBA1328 sp013204545	134	2951300	0	3.61	66.67	1.20321	93.97	80	91.176
3300001835_22	>90% completeness AND <5% contamination	Nayfach et al.	d__Bacteria;p__Chloroflexota;c__Dehalococcoidia;o__UBA1151;f__Bin127;g__UBA9455;s__UBA9455 sp002313245	130	2378540	0	1.72	0	1.72	97.41	100	97.928
GCA_913048295.1_ERR599008_bin.58_MetaBAT_v2.12.1_MAG_genomic	>90% completeness AND <5% contamination	Genbank	d__Bacteria;p__Chloroflexota;c__Dehalococcoidia;o__UBA1151;f__Bin127;g__UBA9455;s__UBA9455 sp002313245	110	2431020	0	0	0	0	92.24	90	91.792
GCA_009693115.1_ASM969311v1_genomic	>90% completeness AND <5% contamination	Genbank	d__Bacteria;p__Chloroflexota;c__Dehalococcoidia;o__UBA1151;f__SHXW01;g__SHXW01;s__SHXW01 sp009693115	40	2016580	0	0	0	0	95.69	100	96.552
GCA_002716865.1_ASM271686v1_genomic	>90% completeness AND <5% contamination	Genbank	d__Bacteria;p__Chloroflexota;c__Dehalococcoidia;o__UBA1151;f__TMED-70;g__GCA-002700125;s__GCA-002700125 sp009392285	20	1292320	0	7.05	100	0	91.38	85	90.104
GCA_002721615.1_ASM272161v1_genomic	>90% completeness AND <5% contamination	Genbank	d__Bacteria;p__Chloroflexota;c__Dehalococcoidia;o__UBA1151;f__TMED-70;g__GCA-2721615;s__GCA-2721615 sp002721615	27	1460660	0	0	0	0	93.97	90	93.176
GCA_004214105.1_ASM421410v1_genomic	>90% completeness AND <5% contamination	Genbank	d__Bacteria;p__Chloroflexota;c__Dehalococcoidia;o__UBA1151;f__TMED-70;g__TMED-70;s__TMED-70 sp002699165	9	1310010	0	0	0	0	96.55	95	96.24
GCA_002703265.1_ASM270326v1_genomic	>90% completeness AND <5% contamination	Genbank	d__Bacteria;p__Chloroflexota;c__Dehalococcoidia;o__UBA1151;f__TMED-70;g__TMED-70;s__TMED-70 sp002703265	42	1337580	0	2.51	100	0	96.55	95	96.24
GCA_009391405.1_ASM939140v1_genomic	>90% completeness AND <5% contamination	Genbank	d__Bacteria;p__Chloroflexota;c__Dehalococcoidia;o__UBA1151;f__TMED-70;g__TMED-70;s__TMED-70 sp002703265	46	1390430	0	0	0	0	96.55	95	96.24
GCA_913031425.1_ERR599130_bin.56_MetaBAT_v2.12.1_MAG_genomic	>90% completeness AND <5% contamination	Genbank	d__Bacteria;p__Chloroflexota;c__Dehalococcoidia;o__UBA1151;f__TMED-70;g__TMED-70;s__TMED-70 sp002703265	40	1330660	0	0	0	0	96.55	95	96.24
GCA_009937255.1_ASM993725v1_genomic	>90% completeness AND <5% contamination	Genbank	d__Bacteria;p__Chloroflexota;c__Dehalococcoidia;o__UBA1151;f__TMED-70;g__TMED-70;s__TMED-70 sp009937255	108	1466940	0	1.88	50	0.94	96.39	100	97.112
GCA_016872495.1_JGI_2017-08-21_genomic	>90% completeness AND <5% contamination	Genbank	d__Bacteria;p__Chloroflexota;c__Dehalococcoidia;o__UBA1151;f__UBA1151;g__;s__	102	2338610	0	0	0	0	97.41	100	97.928
GCA_012959315.1_ASM1295931v1_genomic	>90% completeness AND <5% contamination	Genbank	d__Bacteria;p__Chloroflexota;c__Dehalococcoidia;o__UBA1151;f__UBA1151;g__GCA-2730555;s__	377	2518110	0	6.14	100	0	91.93	85	90.544
GCA_018650185.1_ASM1865018v1_genomic	>90% completeness AND <5% contamination	Genbank	d__Bacteria;p__Chloroflexota;c__Dehalococcoidia;o__UBA1151;f__UBA1151;g__GCA-2730555;s__	212	3082480	0	2.59	0	2.59	98.28	100	98.624
GCA_002730555.1_ASM273055v1_genomic	>90% completeness AND <5% contamination	Genbank	d__Bacteria;p__Chloroflexota;c__Dehalococcoidia;o__UBA1151;f__UBA1151;g__GCA-2730555;s__GCA-2730555 sp002730555	41	2568350	0	0	0	0	98.28	95	97.624
3300027844_33	>90% completeness AND <5% contamination	Nayfach et al.	d__Bacteria;p__Chloroflexota;c__Dehalococcoidia;o__UBA1151;f__UBA1151;g__UBA1151;s__	246	3027720	0	0	0	0	97.41	100	97.928
GCA_013204555.1_ASM1320455v1_genomic	>90% completeness AND <5% contamination	Genbank	d__Bacteria;p__Chloroflexota;c__Dehalococcoidia;o__UBA1151;f__UBA1151;g__UBA1151;s__UBA1151 sp013204555	82	3733400	0	0.16	100	0	97.41	95	96.928
GCA_016210565.1_ASM1621056v1_genomic	>90% completeness AND <5% contamination	Genbank	d__Bacteria;p__Chloroflexota;c__Dehalococcoidia;o__UBA2247;f__;g__;s__	419	6531960	0	0	0	0	93.1	100	94.48
3300002821_50	>90% completeness AND <5% contamination	Nayfach et al.	d__Bacteria;p__Chloroflexota;c__Dehalococcoidia;o__UBA2247;f__UBA2247;g__UBA2247;s__UBA2247 sp002347295	76	1572680	0	0	0	0	97.41	100	97.928
GCA_002383345.1_ASM238334v1_genomic	>90% completeness AND <5% contamination	Genbank	d__Bacteria;p__Chloroflexota;c__Dehalococcoidia;o__UBA2247;f__UBA2247;g__UBA2247;s__UBA2247 sp002347295	157	1323270	0	0	0	0	95.69	70	90.552
GCA_016876035.1_JGI_2017-08-21_genomic	>90% completeness AND <5% contamination	Genbank	d__Bacteria;p__Chloroflexota;c__Dehalococcoidia;o__UBA2777;f__RBG-13-53-26;g__B9-G15;s__	159	2533320	0	0	0	0	93.97	100	95.176
GCA_003551705.1_ASM355170v1_genomic	>90% completeness AND <5% contamination	Genbank	d__Bacteria;p__Chloroflexota;c__Dehalococcoidia;o__UBA2777;f__RBG-13-53-26;g__PUNJ01;s__PUNJ01 sp003551705	212	2812450	0.570677	0	0	0	95.69	85	93.552
3300020109_66	>90% completeness AND <5% contamination	Nayfach et al.	d__Bacteria;p__Chloroflexota;c__Dehalococcoidia;o__UBA2777;f__RBG-13-53-26;g__RBG-13-53-26;s__	89	2114580	0	0	0	0	89.37	95	90.496
3300027852_53	>90% completeness AND <5% contamination	Nayfach et al.	d__Bacteria;p__Chloroflexota;c__Dehalococcoidia;o__UBA2777;f__UBA2777;g__UBA2777;s__UBA2777 sp002352365	186	1964610	0	3.45	50	1.725	93.1	95	93.48
GCA_002352365.1_ASM235236v1_genomic	>90% completeness AND <5% contamination	Genbank	d__Bacteria;p__Chloroflexota;c__Dehalococcoidia;o__UBA2777;f__UBA2777;g__UBA2777;s__UBA2777 sp002352365	175	1823050	0	1.72	0	1.72	93.97	95	94.176
GCA_913047625.1_ERR599156_bin.243_MetaBAT_v2.12.1_MAG_genomic	>90% completeness AND <5% contamination	Genbank	d__Bacteria;p__Chloroflexota;c__Dehalococcoidia;o__UBA2963;f__;g__;s__	42	1550330	0	1.72	0	1.72	93.97	95	94.176
GCA_016872415.1_JGI_2017-08-21_genomic	>90% completeness AND <5% contamination	Genbank	d__Bacteria;p__Chloroflexota;c__Dehalococcoidia;o__UBA2963;f__UBA2963;g__;s__	106	2002250	0	0.16	100	0	95.69	100	96.552
2.02672e+06	>90% completeness AND <5% contamination	PATRIC	d__Bacteria;p__Chloroflexota;c__Dehalococcoidia;o__UBA2963;f__UBA2963;g__Bin16;s__Bin16 sp009838965	186	2600970	0	0	0	0	95.53	100	96.424
GCA_009838965.1_ASM983896v1_genomic	>90% completeness AND <5% contamination	Genbank	d__Bacteria;p__Chloroflexota;c__Dehalococcoidia;o__UBA2963;f__UBA2963;g__Bin16;s__Bin16 sp009838965	106	3013980	0	0	0	0	97.41	95	96.928
GCA_002713775.1_ASM271377v1_genomic	>90% completeness AND <5% contamination	Genbank	d__Bacteria;p__Chloroflexota;c__Dehalococcoidia;o__UBA2963;f__UBA2963;g__UBA2963;s__UBA2963 sp002719715	36	1784940	0	10.5	100	0	95.85	100	96.68
GCA_009391465.1_ASM939146v1_genomic	>90% completeness AND <5% contamination	Genbank	d__Bacteria;p__Chloroflexota;c__Dehalococcoidia;o__UBA2963;f__UBA2963;g__UBA2963;s__UBA2963 sp003215215	32	1650910	0	0.94	0	0.94	99.14	100	99.312
GCA_019694855.1_ASM1969485v1_genomic	>90% completeness AND <5% contamination	Genbank	d__Bacteria;p__Chloroflexota;c__Dehalococcoidia;o__UBA2979;f__UBA2979;g__;s__	130	2464710	0	0	0	0	96.55	100	97.24
2.02673e+06	>90% completeness AND <5% contamination	PATRIC	d__Bacteria;p__Chloroflexota;c__Dehalococcoidia;o__UBA2979;f__UBA2979;g__RBC038;s__	119	2737040	0	1.72	0	1.72	92.24	100	93.792
GCA_903917615.1_freshwater_MAG_---_Kiruna2_bin-0196_genomic	>90% completeness AND <5% contamination	Genbank	d__Bacteria;p__Chloroflexota;c__Dehalococcoidia;o__UBA2979;f__UBA2979;g__SHYQ01;s__SHYQ01 sp903917615	315	2675080	0	4.61	28.57	3.29292	93.97	90	93.176
GCA_004297315.1_ASM429731v1_genomic	>90% completeness AND <5% contamination	Genbank	d__Bacteria;p__Chloroflexota;c__Dehalococcoidia;o__UBA2979;f__UBA2979;g__SURF-43;s__SURF-43 sp004297315	323	2508030	0.0733644	7.76	50	3.88	91.38	100	93.104
GCA_002455955.1_ASM245595v1_genomic	>90% completeness AND <5% contamination	Genbank	d__Bacteria;p__Chloroflexota;c__Dehalococcoidia;o__UBA2979;f__UBA2979;g__UBA6627;s__UBA6627 sp002455955	92	1794030	0	0	0	0	90.92	90	90.736
GCA_002707835.1_ASM270783v1_genomic	>90% completeness AND <5% contamination	Genbank	d__Bacteria;p__Chloroflexota;c__Dehalococcoidia;o__UBA2979;f__UBA2979;g__UBA6955;s__UBA6955 sp002707835	23	1642010	0	1.72	0	1.72	96.21	90	94.968
GCA_009837285.1_ASM983728v1_genomic	>90% completeness AND <5% contamination	Genbank	d__Bacteria;p__Chloroflexota;c__Dehalococcoidia;o__UBA2979;f__UBA2979;g__VXMT01;s__VXMT01 sp009837285	153	2401770	0	0.86	100	0	92.08	90	91.664
GCA_009839925.1_ASM983992v1_genomic	>90% completeness AND <5% contamination	Genbank	d__Bacteria;p__Chloroflexota;c__Dehalococcoidia;o__UBA2979;f__UBA2979;g__VXMT01;s__VXMT01 sp009839925	214	2857510	0	0.16	100	0	96.55	95	96.24
GCA_009840945.1_ASM984094v1_genomic	>90% completeness AND <5% contamination	Genbank	d__Bacteria;p__Chloroflexota;c__Dehalococcoidia;o__UBA2979;f__UBA2979;g__VXMT01;s__VXMT01 sp009840945	136	2530630	0	0	0	0	93.97	100	95.176
GCA_009840965.1_ASM984096v1_genomic	>90% completeness AND <5% contamination	Genbank	d__Bacteria;p__Chloroflexota;c__Dehalococcoidia;o__UBA2979;f__UBA2979;g__VXMT01;s__VXMT01 sp009840965	296	2690420	0	0.16	0	0.16	89.5	95	90.6
GCA_016866055.1_JGI_2017-08-21_genomic	>90% completeness AND <5% contamination	Genbank	d__Bacteria;p__Chloroflexota;c__Dehalococcoidia;o__UBA2979;f__UBA2979;g__WHSU01;s__	375	2854260	0	3.45	0	3.45	93.97	90	93.176
GCA_009379925.1_ASM937992v1_genomic	>90% completeness AND <5% contamination	Genbank	d__Bacteria;p__Chloroflexota;c__Dehalococcoidia;o__UBA2979;f__UBA2979;g__WHSU01;s__WHSU01 sp009379925	71	3544550	0	1.72	0	1.72	91.07	95	91.856
3300027847_85	>90% completeness AND <5% contamination	Nayfach et al.	d__Bacteria;p__Chloroflexota;c__Dehalococcoidia;o__UBA2985;f__UBA2985;g__;s__	16	1334040	0	0	0	0	97.41	100	97.928
GCA_015661155.1_ASM1566115v1_genomic	>90% completeness AND <5% contamination	Genbank	d__Bacteria;p__Chloroflexota;c__Dehalococcoidia;o__UBA2985;f__UBA2985;g__;s__	101	1812210	0	1.72	0	1.72	93.1	100	94.48
GCA_009391535.1_ASM939153v1_genomic	>90% completeness AND <5% contamination	Genbank	d__Bacteria;p__Chloroflexota;c__Dehalococcoidia;o__UBA2985;f__UBA2985;g__VFHP01;s__VFHP01 sp009391535	26	1362310	0	0	0	0	90.52	100	92.416
3300027968_36	>90% completeness AND <5% contamination	Nayfach et al.	d__Bacteria;p__Chloroflexota;c__Dehalococcoidia;o__UBA2991;f__;g__;s__	228	3462560	0	5.17	66.67	1.72316	99.14	90	97.312
2.02673e+06	>90% completeness AND <5% contamination	PATRIC	d__Bacteria;p__Chloroflexota;c__Dehalococcoidia;o__UBA2991;f__UBA2991;g__;s__	399	3078110	0.0558784	2.35	0	2.35	92.87	80	90.296
2.02673e+06	>90% completeness AND <5% contamination	PATRIC	d__Bacteria;p__Chloroflexota;c__Dehalococcoidia;o__UBA2991;f__UBA2991;g__;s__	66	3283840	0	1.72	0	1.72	96.55	95	96.24
2.02673e+06	>90% completeness AND <5% contamination	PATRIC	d__Bacteria;p__Chloroflexota;c__Dehalococcoidia;o__UBA2991;f__UBA2991;g__;s__	95	4171210	0	2.35	20	1.88	97.18	95	96.744
2.02673e+06	>90% completeness AND <5% contamination	PATRIC	d__Bacteria;p__Chloroflexota;c__Dehalococcoidia;o__UBA2991;f__UBA2991;g__FeB-14;s__	40	3757820	0	1.72	0	1.72	98.28	95	97.624
2.02673e+06	>90% completeness AND <5% contamination	PATRIC	d__Bacteria;p__Chloroflexota;c__Dehalococcoidia;o__UBA2991;f__UBA2991;g__FeB-14;s__	63	3367050	0	2.59	50	1.295	96.32	95	96.056
GCA_014860315.1_ASM1486031v1_genomic	>90% completeness AND <5% contamination	Genbank	d__Bacteria;p__Chloroflexota;c__Dehalococcoidia;o__UBA2991;f__UBA2991;g__FeB-14;s__	678	3976650	0	8.62	50	4.31	93.97	80	91.176
GCA_016704105.1_ASM1670410v1_genomic	>90% completeness AND <5% contamination	Genbank	d__Bacteria;p__Chloroflexota;c__Dehalococcoidia;o__UBA2991;f__UBA2991;g__FeB-14;s__	27	3711360	0.812371	1.72	0	1.72	95.69	100	96.552
GCA_016705355.1_ASM1670535v1_genomic	>90% completeness AND <5% contamination	Genbank	d__Bacteria;p__Chloroflexota;c__Dehalococcoidia;o__UBA2991;f__UBA2991;g__FeB-14;s__	19	3510980	0	1.72	0	1.72	97.54	100	98.032
GCA_016705845.1_ASM1670584v1_genomic	>90% completeness AND <5% contamination	Genbank	d__Bacteria;p__Chloroflexota;c__Dehalococcoidia;o__UBA2991;f__UBA2991;g__FeB-14;s__	38	3286590	0.879027	1.72	0	1.72	98.28	90	96.624
GCA_016706855.1_ASM1670685v1_genomic	>90% completeness AND <5% contamination	Genbank	d__Bacteria;p__Chloroflexota;c__Dehalococcoidia;o__UBA2991;f__UBA2991;g__FeB-14;s__	32	3270030	0	1.72	0	1.72	89.66	95	90.728
GCA_016708155.1_ASM1670815v1_genomic	>90% completeness AND <5% contamination	Genbank	d__Bacteria;p__Chloroflexota;c__Dehalococcoidia;o__UBA2991;f__UBA2991;g__FeB-14;s__	16	3440540	0	1.72	0	1.72	93.1	100	94.48
GCA_016710695.1_ASM1671069v1_genomic	>90% completeness AND <5% contamination	Genbank	d__Bacteria;p__Chloroflexota;c__Dehalococcoidia;o__UBA2991;f__UBA2991;g__FeB-14;s__	6	3413000	0	1.72	0	1.72	94.83	100	95.864
GCA_016717905.1_ASM1671790v1_genomic	>90% completeness AND <5% contamination	Genbank	d__Bacteria;p__Chloroflexota;c__Dehalococcoidia;o__UBA2991;f__UBA2991;g__FeB-14;s__	30	3278900	0	2.59	50	1.295	94.51	100	95.608
GCA_016718215.1_ASM1671821v1_genomic	>90% completeness AND <5% contamination	Genbank	d__Bacteria;p__Chloroflexota;c__Dehalococcoidia;o__UBA2991;f__UBA2991;g__FeB-14;s__	56	4.10578e+06	0.572851	3.45	0	3.45	96.55	100	97.24
GCA_016719395.1_ASM1671939v1_genomic	>90% completeness AND <5% contamination	Genbank	d__Bacteria;p__Chloroflexota;c__Dehalococcoidia;o__UBA2991;f__UBA2991;g__FeB-14;s__	17	3446940	0	1.72	0	1.72	94.83	100	95.864
3300017444_37	>90% completeness AND <5% contamination	Nayfach et al.	d__Bacteria;p__Chloroflexota;c__Dehalococcoidia;o__UBA2991;f__UBA2991;g__G233;s__	7	3802410	0	1.72	0	1.72	98.28	100	98.624
3300020139_24	>90% completeness AND <5% contamination	Nayfach et al.	d__Bacteria;p__Chloroflexota;c__Dehalococcoidia;o__UBA2991;f__UBA2991;g__HRBIN29;s__HRBIN29 sp002898215	58	2351870	0	0	0	0	93.97	100	95.176
GCA_011048275.1_ASM1104827v1_genomic	>90% completeness AND <5% contamination	Genbank	d__Bacteria;p__Chloroflexota;c__Dehalococcoidia;o__UBA2991;f__UBA2991;g__HRBIN29;s__HRBIN29 sp011048275	5	2271250	0	0	0	0	95.69	100	96.552
GCA_016703545.1_ASM1670354v1_genomic	>90% completeness AND <5% contamination	Genbank	d__Bacteria;p__Chloroflexota;c__Dehalococcoidia;o__UBA2991;f__UBA2991;g__PNKC01;s__	21	3490230	0	1.72	0	1.72	88.64	100	90.912
GCA_007118095.1_ASM711809v1_genomic	>90% completeness AND <5% contamination	Genbank	d__Bacteria;p__Chloroflexota;c__Dehalococcoidia;o__UBA2991;f__UBA2991;g__SLAK01;s__SLAK01 sp007118095	227	3226160	0	1.72	0	1.72	95.69	95	95.552
GCA_008838325.1_ASM883832v1_genomic	>90% completeness AND <5% contamination	Genbank	d__Bacteria;p__Chloroflexota;c__Dehalococcoidia;o__UBA2991;f__UBA2991;g__Tepidiforma;s__Tepidiforma bonchosmolovskayae	1	2746950	0	1.72	0	1.72	97.41	100	97.928
GCA_002563855.1_ASM256385v1_genomic	>90% completeness AND <5% contamination	Genbank	d__Bacteria;p__Chloroflexota;c__Dehalococcoidia;o__UBA2991;f__UBA2991;g__Tepidiforma;s__Tepidiforma sp002563855	1	2743340	0	1.72	0	1.72	97.41	100	97.928
3300027847_70	>90% completeness AND <5% contamination	Nayfach et al.	d__Bacteria;p__Chloroflexota;c__Dehalococcoidia;o__UBA2991;f__UBA2991;g__UBA2991;s__	56	1603040	0	3.45	0	3.45	88.79	100	91.032
GCA_009837325.1_ASM983732v1_genomic	>90% completeness AND <5% contamination	Genbank	d__Bacteria;p__Chloroflexota;c__Dehalococcoidia;o__UBA2991;f__UBA2991;g__UBA2991;s__UBA2991 sp009839725	281	2641090	0.330545	0	0	0	91.9	100	93.52
GCA_009839725.1_ASM983972v1_genomic	>90% completeness AND <5% contamination	Genbank	d__Bacteria;p__Chloroflexota;c__Dehalococcoidia;o__UBA2991;f__UBA2991;g__UBA2991;s__UBA2991 sp009839725	160	2834770	0	0	0	0	96.55	100	97.24
GCA_009841435.1_ASM984143v1_genomic	>90% completeness AND <5% contamination	Genbank	d__Bacteria;p__Chloroflexota;c__Dehalococcoidia;o__UBA2991;f__UBA2991;g__UBA2991;s__UBA2991 sp009841435	127	2708200	0	3.45	0	3.45	97.59	100	98.072
GCA_015075555.1_ASM1507555v1_genomic	>90% completeness AND <5% contamination	Genbank	d__Bacteria;p__Chloroflexota;c__Dehalococcoidia;o__UBA2991;f__UBA2991;g__UCB2;s__	4	3148100	0	1.72	0	1.72	94.83	90	93.864
GCA_016234445.1_ASM1623444v1_genomic	>90% completeness AND <5% contamination	Genbank	d__Bacteria;p__Chloroflexota;c__Dehalococcoidia;o__UBA2991;f__UBA2991;g__UCB2;s__	20	3544490	0	2.35	0	2.35	96.55	100	97.24
3300027822_67	>90% completeness AND <5% contamination	Nayfach et al.	d__Bacteria;p__Chloroflexota;c__Dehalococcoidia;o__UBA3088;f__UBA3088;g__UBA3088;s__UBA3088 sp002367275	75	1341740	0	0	0	0	93.97	90	93.176
3300020214_33	>90% completeness AND <5% contamination	Nayfach et al.	d__Bacteria;p__Chloroflexota;c__Dehalococcoidia;o__UBA3495;f__GCA-2712585;g__;s__	84	2611350	0	0	0	0	99.14	100	99.312
GCA_002723125.1_ASM272312v1_genomic	>90% completeness AND <5% contamination	Genbank	d__Bacteria;p__Chloroflexota;c__Dehalococcoidia;o__UBA3495;f__UBA2588;g__UBA2588;s__UBA2588 sp002723125	18	1660230	0	0	0	0	97.1	100	97.68
GCA_009392355.1_ASM939235v1_genomic	>90% completeness AND <5% contamination	Genbank	d__Bacteria;p__Chloroflexota;c__Dehalococcoidia;o__UBA3495;f__UBA2588;g__UBA2588;s__UBA2588 sp002723125	163	1297740	0	1.72	100	0	90.91	90	90.728
GCA_009392805.1_ASM939280v1_genomic	>90% completeness AND <5% contamination	Genbank	d__Bacteria;p__Chloroflexota;c__Dehalococcoidia;o__UBA3495;f__UBA2588;g__UBA2588;s__UBA2588 sp002723125	9	1646790	0	0	0	0	97.26	100	97.808
GCA_003523055.1_ASM352305v1_genomic	>90% completeness AND <5% contamination	Genbank	d__Bacteria;p__Chloroflexota;c__Dehalococcoidia;o__UBA3495;f__UBA2588;g__UBA2588;s__UBA2588 sp003523055	25	1790260	0	0	0	0	96.39	100	97.112
3300020197_37	>90% completeness AND <5% contamination	Nayfach et al.	d__Bacteria;p__Chloroflexota;c__Dehalococcoidia;o__UBA3495;f__UBA3495;g__;s__	106	2689280	0	0	0	0	97.41	100	97.928
GCA_002238505.1_ASM223850v1_genomic	>90% completeness AND <5% contamination	Genbank	d__Bacteria;p__Chloroflexota;c__Dehalococcoidia;o__UBA3495;f__UBA3495;g__Bin22;s__Bin22 sp002238505	58	4393250	0.245832	0	0	0	97.41	100	97.928
GCA_009840135.1_ASM984013v1_genomic	>90% completeness AND <5% contamination	Genbank	d__Bacteria;p__Chloroflexota;c__Dehalococcoidia;o__UBA3495;f__UBA3495;g__Bin22;s__Bin22 sp009840135	190	3454760	0	0	0	0	96.79	100	97.432
GCA_002238825.1_ASM223882v1_genomic	>90% completeness AND <5% contamination	Genbank	d__Bacteria;p__Chloroflexota;c__Dehalococcoidia;o__UBA3495;f__UBA3495;g__Bin87;s__Bin87 sp002238825	67	4958140	0	0	0	0	97.26	100	97.808
GCA_009841575.1_ASM984157v1_genomic	>90% completeness AND <5% contamination	Genbank	d__Bacteria;p__Chloroflexota;c__Dehalococcoidia;o__UBA3495;f__UBA3495;g__Bin87;s__Bin87 sp009837355	74	3229450	0	0	0	0	95.53	100	96.424
GCA_009840165.1_ASM984016v1_genomic	>90% completeness AND <5% contamination	Genbank	d__Bacteria;p__Chloroflexota;c__Dehalococcoidia;o__UBA3495;f__UBA3495;g__Bin87;s__Bin87 sp009840165	115	3757820	0	0	0	0	97.41	100	97.928
GCA_009693075.1_ASM969307v1_genomic	>90% completeness AND <5% contamination	Genbank	d__Bacteria;p__Chloroflexota;c__Dehalococcoidia;o__UBA3495;f__UBA3495;g__SHYG01;s__SHYG01 sp009692925	86	2158420	0	0.86	100	0	96.55	100	97.24
GCA_002311385.1_ASM231138v1_genomic	>90% completeness AND <5% contamination	Genbank	d__Bacteria;p__Chloroflexota;c__Dehalococcoidia;o__UBA3495;f__UBA3495;g__UBA1141;s__UBA1141 sp002311385	155	3766840	0	1.72	0	1.72	97.07	95	96.656
3300026108_2	>90% completeness AND <5% contamination	Nayfach et al.	d__Bacteria;p__Chloroflexota;c__Dehalococcoidia;o__UBA3495;f__UBA3495;g__UBA11650;s__UBA11650 sp002401285	255	3986720	0	6.9	40	4.14	97.41	95	96.928
GCA_913047595.1_ERR598947_bin.96_MetaBAT_v2.12.1_MAG_genomic	>90% completeness AND <5% contamination	Genbank	d__Bacteria;p__Chloroflexota;c__Dehalococcoidia;o__UBA3495;f__UBA3495;g__UBA11650;s__UBA11650 sp002708395	400	2860780	0	3.45	0	3.45	90.52	90	90.416
GCA_002710215.1_ASM271021v1_genomic	>90% completeness AND <5% contamination	Genbank	d__Bacteria;p__Chloroflexota;c__Dehalococcoidia;o__UBA3495;f__UBA3495;g__UBA11650;s__UBA11650 sp002710215	76	3074700	0	3.45	33.33	2.30011	91.9	95	92.52
3300001683_28	>90% completeness AND <5% contamination	Nayfach et al.	d__Bacteria;p__Chloroflexota;c__Dehalococcoidia;o__UBA3495;f__UBA3495;g__UBA9611;s__	77	3005830	1.06826	0	0	0	95.69	100	96.552
3300027677_4	>90% completeness AND <5% contamination	Nayfach et al.	d__Bacteria;p__Chloroflexota;c__Dehalococcoidia;o__UBA3495;f__UBA3495;g__UBA9611;s__	205	3015860	0	1.72	0	1.72	93.65	100	94.92
3300027844_27	>90% completeness AND <5% contamination	Nayfach et al.	d__Bacteria;p__Chloroflexota;c__Dehalococcoidia;o__UBA3495;f__UBA3495;g__UBA9611;s__	81	3352540	0	4.31	66.67	1.43652	97.26	100	97.808
GCA_009391395.1_ASM939139v1_genomic	>90% completeness AND <5% contamination	Genbank	d__Bacteria;p__Chloroflexota;c__Dehalococcoidia;o__UBA3495;f__UBA3495;g__UBA9611;s__UBA9611 sp002328185	82	3121830	3.86312	0.86	0	0.86	96.55	95	96.24
GCA_009392255.1_ASM939225v1_genomic	>90% completeness AND <5% contamination	Genbank	d__Bacteria;p__Chloroflexota;c__Dehalococcoidia;o__UBA3495;f__UBA3495;g__UBA9611;s__UBA9611 sp002721995	133	2491680	0	0	0	0	93.97	85	92.176
GCA_002746355.1_ASM274635v1_genomic	>90% completeness AND <5% contamination	Genbank	d__Bacteria;p__Chloroflexota;c__Dehalococcoidia;o__UBA3495;f__UBA3495;g__UBA9611;s__UBA9611 sp002746355	100	3538340	0.10683	1.72	100	0	97.41	90	95.928
GCA_013204585.1_ASM1320458v1_genomic	>90% completeness AND <5% contamination	Genbank	d__Bacteria;p__Chloroflexota;c__Dehalococcoidia;o__UBA3495;f__UBA3495;g__UBA9611;s__UBA9611 sp013204585	76	3127060	0.0671557	0.57	0	0.57	92.24	95	92.792
GCA_009840175.1_ASM984017v1_genomic	>90% completeness AND <5% contamination	Genbank	d__Bacteria;p__Chloroflexota;c__Dehalococcoidia;o__UBA3495;f__UBA3495;g__VXOI01;s__VXOI01 sp009840175	268	4312190	0	0	0	0	99.14	95	98.312
GCA_009841045.1_ASM984104v1_genomic	>90% completeness AND <5% contamination	Genbank	d__Bacteria;p__Chloroflexota;c__Dehalococcoidia;o__UBA6926;f__UBA6926;g__VXMO01;s__VXMO01 sp009841045	63	1952380	0	0	0	0	93.97	100	95.176
GCA_009392005.1_ASM939200v1_genomic	>90% completeness AND <5% contamination	Genbank	d__Bacteria;p__Chloroflexota;c__Dehalococcoidia;o__UBA6926;f__VFHL01;g__VFHL01;s__VFHL01 sp009392005	13	1600500	0	0	0	0	94.83	100	95.864
3300027819_39	>90% completeness AND <5% contamination	Nayfach et al.	d__Bacteria;p__Chloroflexota;c__Dehalococcoidia;o__UBA6952;f__;g__;s__	67	3132610	0	2.59	100	0	97.41	100	97.928
GCA_003228195.2_ASM322819v2_genomic	>90% completeness AND <5% contamination	Genbank	d__Bacteria;p__Chloroflexota;c__Dehalococcoidia;o__UBA6952;f__QGNO01;g__QGNO01;s__QGNO01 sp003228195	28	1522800	2.69898	1.72	0	1.72	98.28	100	98.624
GCA_016179765.1_ASM1617976v1_genomic	>90% completeness AND <5% contamination	Genbank	d__Bacteria;p__Chloroflexota;c__Dehalococcoidia;o__UBA6952;f__SHYF01;g__;s__	53	2287210	0	0	0	0	96.55	100	97.24
GCA_016202425.1_ASM1620242v1_genomic	>90% completeness AND <5% contamination	Genbank	d__Bacteria;p__Chloroflexota;c__Dehalococcoidia;o__UBA6952;f__SHYF01;g__;s__	213	1956990	0	0.47	0	0.47	97.41	90	95.928
GCA_913045215.1_ERR599097_bin.132_MetaBAT_v2.12.1_MAG_genomic	>90% completeness AND <5% contamination	Genbank	d__Bacteria;p__Chloroflexota;c__Dehalococcoidia;o__UBA6952;f__UBA6952;g__UBA6952;s__UBA6952 sp009392515	58	1609550	0	0	0	0	99.14	100	99.312
GCA_009377665.1_ASM937766v1_genomic	>90% completeness AND <5% contamination	Genbank	d__Bacteria;p__Chloroflexota;c__Dehalococcoidia;o__WHTO01;f__WHTO01;g__WHTO01;s__WHTO01 sp009377665	269	2957120	0	3.45	0	3.45	90.13	95	91.104
GCA_017853275.1_ASM1785327v1_genomic	>90% completeness AND <5% contamination	Genbank	d__Bacteria;p__Chloroflexota;c__Ellin6529;o__CSP1-4;f__CSP1-4;g__;s__	119	2889350	0	0.16	100	0	93.97	100	95.176
GCA_017881985.1_ASM1788198v1_genomic	>90% completeness AND <5% contamination	Genbank	d__Bacteria;p__Chloroflexota;c__Ellin6529;o__CSP1-4;f__CSP1-4;g__;s__	356	3089990	0	1.88	100	0	89.66	100	91.728
GCA_019637815.1_ASM1963781v1_genomic	>90% completeness AND <5% contamination	Genbank	d__Bacteria;p__Chloroflexota;c__Ellin6529;o__CSP1-4;f__CSP1-4;g__;s__	61	4069450	0	0	0	0	94.83	100	95.864
GCA_015478725.1_ASM1547872v1_genomic	>90% completeness AND <5% contamination	Genbank	d__Bacteria;p__Chloroflexota;c__Ellin6529;o__CSP1-4;f__CSP1-4;g__C-114;s__	153	3452480	1.02477	1.72	100	0	94.83	100	95.864
GCA_919901745.1_Hainich-H41-bin260-1_genomic	>90% completeness AND <5% contamination	Genbank	d__Bacteria;p__Chloroflexota;c__Ellin6529;o__CSP1-4;f__CSP1-4;g__CAIJPD01;s__	44	3043170	0	0	0	0	93.1	100	94.48
GCA_903833645.1_freshwater_MAG_---_Ki3-D4_bin-496_genomic	>90% completeness AND <5% contamination	Genbank	d__Bacteria;p__Chloroflexota;c__Ellin6529;o__CSP1-4;f__CSP1-4;g__CAIXZV01;s__CAIXZV01 sp903925955	398	3618510	0	1.88	50	0.94	90.88	95	91.704
GCA_903925955.1_freshwater_MAG_---_KTt_bin-0728_genomic	>90% completeness AND <5% contamination	Genbank	d__Bacteria;p__Chloroflexota;c__Ellin6529;o__CSP1-4;f__CSP1-4;g__CAIXZV01;s__CAIXZV01 sp903925955	308	3638930	0	2.04	33.33	1.36007	94.83	80	91.864
GCA_903859655.1_freshwater_MAG_---_LaPlata-7m-a_bin-768_genomic	>90% completeness AND <5% contamination	Genbank	d__Bacteria;p__Chloroflexota;c__Ellin6529;o__CSP1-4;f__CSP1-4;g__CAIXZV01;s__CAIXZV01 sp903930745	736	3912080	0	1.72	100	0	94.83	90	93.864
GCA_005883615.1_ASM588361v1_genomic	>90% completeness AND <5% contamination	Genbank	d__Bacteria;p__Chloroflexota;c__Ellin6529;o__CSP1-4;f__CSP1-4;g__CF-16;s__CF-16 sp005883615	112	3061140	0	0	0	0	94.83	95	94.864
GCA_005882635.1_ASM588263v1_genomic	>90% completeness AND <5% contamination	Genbank	d__Bacteria;p__Chloroflexota;c__Ellin6529;o__CSP1-4;f__CSP1-4;g__CF-46;s__CF-46 sp005882635	222	3176240	0	0	0	0	93.1	90	92.48
GCA_013698095.1_ASM1369809v1_genomic	>90% completeness AND <5% contamination	Genbank	d__Bacteria;p__Chloroflexota;c__Ellin6529;o__CSP1-4;f__CSP1-4;g__CF-46;s__CF-46 sp013698095	261	3913450	0.134919	0	0	0	95.38	100	96.304
GCA_001443375.1_ASM144337v1_genomic	>90% completeness AND <5% contamination	Genbank	d__Bacteria;p__Chloroflexota;c__Ellin6529;o__CSP1-4;f__CSP1-4;g__CSP1-4;s__CSP1-4 sp001443375	65	2585470	0	0	0	0	91.38	90	91.104
GCA_017881885.1_ASM1788188v1_genomic	>90% completeness AND <5% contamination	Genbank	d__Bacteria;p__Chloroflexota;c__Ellin6529;o__CSP1-4;f__CSP1-4;g__Fen-1039;s__	227	2434610	0	3.45	75	0.8625	93.42	95	93.736
GCA_003141245.1_20120800_E3X_genomic	>90% completeness AND <5% contamination	Genbank	d__Bacteria;p__Chloroflexota;c__Ellin6529;o__CSP1-4;f__CSP1-4;g__Fen-1039;s__Fen-1039 sp003141245	47	2542100	0	1.72	0	1.72	94.51	95	94.608
GCA_003141455.1_20120800_E3S_genomic	>90% completeness AND <5% contamination	Genbank	d__Bacteria;p__Chloroflexota;c__Ellin6529;o__CSP1-4;f__CSP1-4;g__Fen-1039;s__Fen-1039 sp003141455	68	3069140	0	0.86	0	0.86	96.39	100	97.112
GCA_003141955.1_20120800_E1D_genomic	>90% completeness AND <5% contamination	Genbank	d__Bacteria;p__Chloroflexota;c__Ellin6529;o__CSP1-4;f__CSP1-4;g__Fen-1039;s__Fen-1039 sp003141955	124	2800470	0	3.45	100	0	94.67	90	93.736
GCA_003158575.1_20120600_E2D_genomic	>90% completeness AND <5% contamination	Genbank	d__Bacteria;p__Chloroflexota;c__Ellin6529;o__CSP1-4;f__CSP1-4;g__Fen-1039;s__Fen-1039 sp003158295	102	2739320	0	0	0	0	90.3	100	92.24
GCA_003158675.1_20120600_E2D_genomic	>90% completeness AND <5% contamination	Genbank	d__Bacteria;p__Chloroflexota;c__Ellin6529;o__CSP1-4;f__CSP1-4;g__Fen-1039;s__Fen-1039 sp003158675	102	2778620	0	0	0	0	91.22	90	90.976
GCA_003171065.1_20110800_E1D_genomic	>90% completeness AND <5% contamination	Genbank	d__Bacteria;p__Chloroflexota;c__Ellin6529;o__CSP1-4;f__CSP1-4;g__Fen-1039;s__Fen-1039 sp003171065	151	3023470	0	0	0	0	94.98	90	93.984
GCA_001794945.1_ASM179494v1_genomic	>90% completeness AND <5% contamination	Genbank	d__Bacteria;p__Chloroflexota;c__Ellin6529;o__CSP1-4;f__CSP1-4;g__GWC2-73-18;s__GWC2-73-18 sp001794945	137	2933780	0	0	0	0	89.66	95	90.728
GCA_003169735.1_20110800_P1D_genomic	>90% completeness AND <5% contamination	Genbank	d__Bacteria;p__Chloroflexota;c__Ellin6529;o__CSP1-4;f__CSP1-4;g__Palsa-1032;s__Palsa-1032 sp003169735	124	3062810	0	0	0	0	95.77	100	96.616
GCA_017881915.1_ASM1788191v1_genomic	>90% completeness AND <5% contamination	Genbank	d__Bacteria;p__Chloroflexota;c__Ellin6529;o__CSP1-4;f__CSP1-4;g__Palsa-1033;s__	166	2924960	0	1.88	50	0.94	95.92	95	95.736
GCA_003152165.1_20120700_P3D_genomic	>90% completeness AND <5% contamination	Genbank	d__Bacteria;p__Chloroflexota;c__Ellin6529;o__CSP1-4;f__CSP1-4;g__Palsa-1033;s__Palsa-1033 sp003152165	177	3603920	0	0	0	0	92.01	100	93.608
GCA_003169655.1_20110800_P1M_genomic	>90% completeness AND <5% contamination	Genbank	d__Bacteria;p__Chloroflexota;c__Ellin6529;o__CSP1-4;f__CSP1-4;g__Palsa-1033;s__Palsa-1033 sp003169655	166	3344750	0	0.16	100	0	89.81	100	91.848
GCA_016191395.1_ASM1619139v1_genomic	>90% completeness AND <5% contamination	Genbank	d__Bacteria;p__Chloroflexota;c__Ellin6529;o__CSP1-4;f__CSP1-4;g__UBA5189;s__	31	2419970	0	0	0	0	94.83	90	93.864
GCA_005889475.1_ASM588947v1_genomic	>90% completeness AND <5% contamination	Genbank	d__Bacteria;p__Chloroflexota;c__Ellin6529;o__CSP1-4;f__CSP1-4;g__UBA5189;s__UBA5189 sp005889475	123	2644230	0	1.72	0	1.72	90.52	100	92.416
GCA_012026785.1_ASM1202678v1_genomic	>90% completeness AND <5% contamination	Genbank	d__Bacteria;p__Chloroflexota;c__Ellin6529;o__CSP1-4;f__CSP1-4;g__UBA5189;s__UBA5189 sp012026785	260	3774660	0.0601379	0	0	0	93.1	90	92.48
GCA_009925905.1_ASM992590v1_genomic	>90% completeness AND <5% contamination	Genbank	d__Bacteria;p__Chloroflexota;c__Ellin6529;o__CSP1-4;f__UBA10416;g__UBA10416;s__UBA10416 sp009925905	154	1233220	0	0	0	0	93.78	90	93.024
GCA_903864185.1_freshwater_MAG_---_Ki3-D1_bin-0051_genomic	>90% completeness AND <5% contamination	Genbank	d__Bacteria;p__Chloroflexota;c__Ellin6529;o__CSP1-4;f__UBA10416;g__UBA10416;s__UBA10416 sp903864185	72	1120000	0	1.88	100	0	94.83	100	95.864
GCA_903894305.1_freshwater_MAG_---_LinL5_bin-0936_genomic	>90% completeness AND <5% contamination	Genbank	d__Bacteria;p__Chloroflexota;c__Ellin6529;o__CSP1-4;f__UBA10416;g__UBA10416;s__UBA10416 sp903864185	179	1108290	0	3.45	100	0	94.83	90	93.864
GCA_903953035.1_freshwater_MAG_---_Loc090907-8-6m_bin-084_genomic	>90% completeness AND <5% contamination	Genbank	d__Bacteria;p__Chloroflexota;c__Ellin6529;o__CSP1-4;f__UBA10416;g__UBA10416;s__UBA10416 sp903944295	187	1188400	0	0.16	0	0.16	91.38	90	91.104
GCA_005881435.1_ASM588143v1_genomic	>90% completeness AND <5% contamination	Genbank	d__Bacteria;p__Chloroflexota;c__Ellin6529;o__P2-11E;f__CF-107;g__CF-107;s__CF-107 sp005881435	151	2892220	0	0	0	0	96.39	85	94.112
GCA_005883625.1_ASM588362v1_genomic	>90% completeness AND <5% contamination	Genbank	d__Bacteria;p__Chloroflexota;c__Ellin6529;o__P2-11E;f__P2-11E;g__3-1-20CM-2-70-9;s__3-1-20CM-2-70-9 sp001919195	129	3186400	0	0.63	33.33	0.420021	100	90	98
GCA_005881885.1_ASM588188v1_genomic	>90% completeness AND <5% contamination	Genbank	d__Bacteria;p__Chloroflexota;c__Ellin6529;o__P2-11E;f__P2-11E;g__3-1-20CM-2-70-9;s__3-1-20CM-2-70-9 sp005881885	234	3356920	0	1.72	100	0	98.28	85	95.624
GCA_005881735.1_ASM588173v1_genomic	>90% completeness AND <5% contamination	Genbank	d__Bacteria;p__Chloroflexota;c__Ellin6529;o__P2-11E;f__P2-11E;g__3-1-20CM-2-70-9;s__3-1-20CM-2-70-9 sp005889075	158	3020220	0	0.86	0	0.86	98.28	85	95.624
GCA_005889295.1_ASM588929v1_genomic	>90% completeness AND <5% contamination	Genbank	d__Bacteria;p__Chloroflexota;c__Ellin6529;o__P2-11E;f__P2-11E;g__3-1-20CM-2-70-9;s__3-1-20CM-2-70-9 sp005889295	339	3234080	0	2.87	66.67	0.956571	95.92	80	92.736
GCA_005880035.1_ASM588003v1_genomic	>90% completeness AND <5% contamination	Genbank	d__Bacteria;p__Chloroflexota;c__Ellin6529;o__P2-11E;f__P2-11E;g__CF-39;s__CF-39 sp005887995	314	3259720	0	3.45	50	1.725	95.82	85	93.656
GCA_005889405.1_ASM588940v1_genomic	>90% completeness AND <5% contamination	Genbank	d__Bacteria;p__Chloroflexota;c__Ellin6529;o__P2-11E;f__P2-11E;g__CF-39;s__CF-39 sp005889405	114	3048320	0	0.86	100	0	96.55	85	94.24
GCA_016183435.1_ASM1618343v1_genomic	>90% completeness AND <5% contamination	Genbank	d__Bacteria;p__Chloroflexota;c__Ellin6529;o__P2-11E;f__P2-11E;g__GWC2-70-10;s__	198	2222730	0	2.07	50	1.035	93.34	90	92.672
GCA_002404035.1_ASM240403v1_genomic	>90% completeness AND <5% contamination	Genbank	d__Bacteria;p__Chloroflexota;c__Ellin6529;o__P2-11E;f__P2-11E;g__UBA4735;s__UBA4735 sp002404155	82	3323190	0	0	0	0	91.38	90	91.104
GCA_013816405.1_ASM1381640v1_genomic	>90% completeness AND <5% contamination	Genbank	d__Bacteria;p__Chloroflexota;c__Ellin6529;o__QHBO01;f__QHBO01;g__CF-167;s__CF-167 sp013816405	102	2501460	0	0	0	0	96.55	100	97.24
GCA_013697395.1_ASM1369739v1_genomic	>90% completeness AND <5% contamination	Genbank	d__Bacteria;p__Chloroflexota;c__Ellin6529;o__QHBO01;f__QHBO01;g__JACDBZ01;s__JACDBZ01 sp013697395	564	3417570	0.123187	4.95	0	4.95	94.83	100	95.864
GCA_003243965.1_ASM324396v1_genomic	>90% completeness AND <5% contamination	Genbank	d__Bacteria;p__Chloroflexota;c__Ellin6529;o__QHBO01;f__QHBO01;g__QHBO01;s__QHBO01 sp003243965	48	2218730	0	0.86	0	0.86	91.38	95	92.104
GCA_019690095.1_ASM1969009v1_genomic	>90% completeness AND <5% contamination	Genbank	d__Bacteria;p__Chloroflexota;c__FW602-bin22;o__FW602-bin22;f__CADDYW01;g__CADDYW01;s__	403	3812700	0	1.72	0	1.72	90.83	100	92.664
GCA_902810745.1_dehalococcoidetesb7_genomic	>90% completeness AND <5% contamination	Genbank	d__Bacteria;p__Chloroflexota;c__FW602-bin22;o__FW602-bin22;f__CADDYW01;g__CADDYW01;s__CADDYW01 sp902810745	293	5588220	0.146737	2.66	0	2.66	99.14	100	99.312
GCA_011051445.1_ASM1105144v1_genomic	>90% completeness AND <5% contamination	Genbank	d__Bacteria;p__Chloroflexota;c__FW602-bin22;o__FW602-bin22;f__DSKJ01;g__DSKJ01;s__DSKJ01 sp011051445	201	3353860	0	1.72	0	1.72	95.69	100	96.552
GCA_004297775.1_ASM429777v1_genomic	>90% completeness AND <5% contamination	Genbank	d__Bacteria;p__Chloroflexota;c__FW602-bin22;o__FW602-bin22;f__FW602-bin22;g__FW602-bin22;s__FW602-bin22 sp004297775	38	4026660	0	1.72	0	1.72	99.14	100	99.312
3300029902_12	>90% completeness AND <5% contamination	Nayfach et al.	d__Bacteria;p__Chloroflexota;c__Ktedonobacteria;o__Ktedonobacterales;f__;g__;s__	271	3972130	0	0.16	100	0	94.67	85	92.736
3300025503_7	>90% completeness AND <5% contamination	Nayfach et al.	d__Bacteria;p__Chloroflexota;c__Ktedonobacteria;o__Ktedonobacterales;f__Ktedonobacteraceae;g__;s__	257	5763470	0.870309	0	0	0	98.28	95	97.624
3300026294_5	>90% completeness AND <5% contamination	Nayfach et al.	d__Bacteria;p__Chloroflexota;c__Ktedonobacteria;o__Ktedonobacterales;f__Ktedonobacteraceae;g__;s__	543	5840580	0.455948	0	0	0	91.8	85	90.44
GCA_016587455.1_ASM1658745v1_genomic	>90% completeness AND <5% contamination	Genbank	d__Bacteria;p__Chloroflexota;c__Ktedonobacteria;o__Ktedonobacterales;f__Ktedonobacteraceae;g__;s__	4	12668980	0	3.29	19.35	2.65339	100	100	100
GCA_902812455.1_dehalococcoidetesb20_genomic	>90% completeness AND <5% contamination	Genbank	d__Bacteria;p__Chloroflexota;c__Ktedonobacteria;o__Ktedonobacterales;f__Ktedonobacteraceae;g__CADDZH01;s__CADDZH01 sp902812455	247	5343610	0.101055	0	0	0	95.69	100	96.552
GCA_015099395.1_ASM1509939v1_genomic	>90% completeness AND <5% contamination	Genbank	d__Bacteria;p__Chloroflexota;c__Ktedonobacteria;o__Ktedonobacterales;f__Ktedonobacteraceae;g__Dictyobacter;s__	1	8879930	0	4.29	18.52	3.49549	97.41	100	97.928
GCA_003967515.1_ASM396751v1_genomic	>90% completeness AND <5% contamination	Genbank	d__Bacteria;p__Chloroflexota;c__Ktedonobacteria;o__Ktedonobacterales;f__Ktedonobacteraceae;g__Dictyobacter;s__Dictyobacter aurantiacus	2	8881660	0	3.29	54.55	1.49531	100	100	100
GCA_008326305.1_ASM832630v1_genomic	>90% completeness AND <5% contamination	Genbank	d__Bacteria;p__Chloroflexota;c__Ktedonobacteria;o__Ktedonobacterales;f__Ktedonobacteraceae;g__Dictyobacter;s__Dictyobacter sp008326305	256	7209580	0	0	0	0	98.28	100	98.624
GCA_008974265.1_ASM897426v1_genomic	>90% completeness AND <5% contamination	Genbank	d__Bacteria;p__Chloroflexota;c__Ktedonobacteria;o__Ktedonobacterales;f__Ktedonobacteraceae;g__Dictyobacter;s__Dictyobacter vulcani	7	7415200	0	1.72	0	1.72	98.12	100	98.496
2.74054e+06	>90% completeness AND <5% contamination	PATRIC	d__Bacteria;p__Chloroflexota;c__Ktedonobacteria;o__Ktedonobacterales;f__Ktedonobacteraceae;g__DTNP01;s__	433	5039970	0.25774	2.87	0	2.87	98.12	100	98.496
GCA_019240835.1_ASM1924083v1_genomic	>90% completeness AND <5% contamination	Genbank	d__Bacteria;p__Chloroflexota;c__Ktedonobacteria;o__Ktedonobacterales;f__Ktedonobacteraceae;g__DTNP01;s__	313	4339820	0.81985	0.63	50	0.315	94.91	100	95.928
GCA_004208415.1_ASM420841v1_genomic	>90% completeness AND <5% contamination	Genbank	d__Bacteria;p__Chloroflexota;c__Ktedonobacteria;o__Ktedonobacterales;f__Ktedonobacteraceae;g__Ktedonosporobacter;s__Ktedonosporobacter rubrisoli	1	11340620	0	0.94	100	0	100	100	100
GCA_019683635.1_ASM1968363v1_genomic	>90% completeness AND <5% contamination	Genbank	d__Bacteria;p__Chloroflexota;c__Ktedonobacteria;o__Ktedonobacterales;f__Ktedonobacteraceae;g__Thermogemmatispora;s__	361	5414050	0	0	0	0	95.88	90	94.704
GCA_019683755.1_ASM1968375v1_genomic	>90% completeness AND <5% contamination	Genbank	d__Bacteria;p__Chloroflexota;c__Ktedonobacteria;o__Ktedonobacterales;f__Ktedonobacteraceae;g__Thermogemmatispora;s__	537	4892380	0.86461	0	0	0	95.69	80	92.552
GCA_008974285.1_ASM897428v1_genomic	>90% completeness AND <5% contamination	Genbank	d__Bacteria;p__Chloroflexota;c__Ktedonobacteria;o__Ktedonobacterales;f__Ktedonobacteraceae;g__Thermogemmatispora;s__Thermogemmatispora aurantia	18	5603770	0	0	0	0	98.98	95	98.184
GCA_000702505.1_ASM70250v1_genomic	>90% completeness AND <5% contamination	Genbank	d__Bacteria;p__Chloroflexota;c__Ktedonobacteria;o__Ktedonobacterales;f__Ktedonobacteraceae;g__Thermogemmatispora;s__Thermogemmatispora carboxidivorans	1	5607960	0	0.63	0	0.63	98.98	95	98.184
732234	>90% completeness AND <5% contamination	PATRIC	d__Bacteria;p__Chloroflexota;c__Ktedonobacteria;o__Ktedonobacterales;f__Ktedonobacteraceae;g__Thermogemmatispora;s__Thermogemmatispora onikobensis	112	5556500	0	0	0	0	98.98	95	98.184
GCA_003268475.1_ASM326847v1_genomic	>90% completeness AND <5% contamination	Genbank	d__Bacteria;p__Chloroflexota;c__Ktedonobacteria;o__Ktedonobacterales;f__Ktedonobacteraceae;g__Thermogemmatispora;s__Thermogemmatispora tikiterensis	6	5973950	0	0	0	0	98.98	95	98.184
GCA_005402645.1_ASM540264v1_genomic	>90% completeness AND <5% contamination	Genbank	d__Bacteria;p__Chloroflexota;c__Ktedonobacteria;o__Ktedonobacterales;f__Ktedonobacteraceae;g__Thermosporothrix;s__Thermosporothrix hazakensis	3	7396570	0	3.45	0	3.45	98.28	100	98.624
GCA_005881495.1_ASM588149v1_genomic	>90% completeness AND <5% contamination	Genbank	d__Bacteria;p__Chloroflexota;c__Ktedonobacteria;o__Ktedonobacterales;f__Ktedonobacteraceae;g__UBA11361;s__UBA11361 sp005881495	470	6583670	0.152802	1.72	0	1.72	98.28	90	96.624
GCA_011523785.1_ASM1152378v1_genomic	>90% completeness AND <5% contamination	Genbank	d__Bacteria;p__Chloroflexota;c__UBA11872;o__UBA11872;f__UBA11872;g__UBA11872;s__UBA11872 sp011523785	214	3302960	0	0	0	0	96.39	100	97.112
GCA_913043205.1_ERR599156_bin.184_MetaBAT_v2.12.1_MAG_genomic	>90% completeness AND <5% contamination	Genbank	d__Bacteria;p__Chloroflexota;c__UBA11872;o__UBA11872;f__VXNJ01;g__;s__	32	1874050	0	0.16	100	0	98.28	95	97.624
GCA_009836645.1_ASM983664v1_genomic	>90% completeness AND <5% contamination	Genbank	d__Bacteria;p__Chloroflexota;c__UBA11872;o__UBA11872;f__VXNJ01;g__VXNJ01;s__VXNJ01 sp009840625	135	2155510	0.844812	0	0	0	93.1	90	92.48
GCA_009838085.1_ASM983808v1_genomic	>90% completeness AND <5% contamination	Genbank	d__Bacteria;p__Chloroflexota;c__UBA11872;o__UBA11872;f__VXNJ01;g__VXNJ01;s__VXNJ01 sp009840625	38	2311920	0.705907	0	0	0	99.14	100	99.312
GCA_009840555.1_ASM984055v1_genomic	>90% completeness AND <5% contamination	Genbank	d__Bacteria;p__Chloroflexota;c__UBA11872;o__UBA11872;f__VXNJ01;g__VXNJ01;s__VXNJ01 sp009840625	35	2267220	0.824358	0	0	0	99.14	100	99.312
GCA_009840625.1_ASM984062v1_genomic	>90% completeness AND <5% contamination	Genbank	d__Bacteria;p__Chloroflexota;c__UBA11872;o__UBA11872;f__VXNJ01;g__VXNJ01;s__VXNJ01 sp009840625	20	2268800	0	0	0	0	99.14	100	99.312
2.02672e+06	>90% completeness AND <5% contamination	PATRIC	d__Bacteria;p__Chloroflexota;c__UBA11872;o__VXOZ01;f__VXOZ01;g__VXOZ01;s__VXOZ01 sp012270555	56	3181360	0	0	0	0	95.69	100	96.552
3300025775_3	>90% completeness AND <5% contamination	Nayfach et al.	d__Bacteria;p__Chloroflexota;c__UBA2235;o__;f__;g__;s__	25	5006090	0	0	0	0	100	95	99
3300012682_11	>90% completeness AND <5% contamination	Nayfach et al.	d__Bacteria;p__Chloroflexota;c__UBA2235;o__UBA12225;f__UBA12225;g__;s__	363	4917210	0	0	0	0	95.69	100	96.552
GCA_902805635.1_AVDCRST-MAG77_genomic	>90% completeness AND <5% contamination	Genbank	d__Bacteria;p__Chloroflexota;c__UBA2235;o__UBA12225;f__UBA12225;g__CADCTC01;s__CADCTC01 sp902805635	327	6097770	0	0.47	33.33	0.313349	96.08	100	96.864
GCA_018970655.1_ASM1897065v1_genomic	>90% completeness AND <5% contamination	Genbank	d__Bacteria;p__Chloroflexota;c__UBA2235;o__UBA12225;f__UBA12225;g__CAILQO01;s__CAILQO01 sp903836285	360	4313280	0	0	0	0	97.41	95	96.928
GCA_903831955.1_freshwater_MAG_---_LaPlata-a_bin-0706_genomic	>90% completeness AND <5% contamination	Genbank	d__Bacteria;p__Chloroflexota;c__UBA2235;o__UBA12225;f__UBA12225;g__CAILQO01;s__CAILQO01 sp903836285	726	3667500	0	1.72	100	0	94.75	95	94.8
GCA_903833425.1_freshwater_MAG_---_LaPlata-1m-a_bin-271_genomic	>90% completeness AND <5% contamination	Genbank	d__Bacteria;p__Chloroflexota;c__UBA2235;o__UBA12225;f__UBA12225;g__CAILQO01;s__CAILQO01 sp903836285	639	3558680	0	0.16	100	0	93.62	85	91.896
GCA_903836285.1_freshwater_MAG_---_LaPlata-5m-a_bin-061_genomic	>90% completeness AND <5% contamination	Genbank	d__Bacteria;p__Chloroflexota;c__UBA2235;o__UBA12225;f__UBA12225;g__CAILQO01;s__CAILQO01 sp903836285	619	3661840	0	1.88	0	1.88	96.41	90	95.128
GCA_903889675.1_freshwater_MAG_---_LaPlata-1m-b_bin-679_genomic	>90% completeness AND <5% contamination	Genbank	d__Bacteria;p__Chloroflexota;c__UBA2235;o__UBA12225;f__UBA12225;g__CAILQO01;s__CAILQO01 sp903836285	554	3667920	0	2.74	66.67	0.913242	92.41	95	92.928
3300012000_4	>90% completeness AND <5% contamination	Nayfach et al.	d__Bacteria;p__Chloroflexota;c__UBA2235;o__UBA12225;f__UBA12225;g__UBA12225;s__UBA12225 sp002347925	415	3189780	0	1.72	0	1.72	93.87	95	94.096
3300027760_13	>90% completeness AND <5% contamination	Nayfach et al.	d__Bacteria;p__Chloroflexota;c__UBA2235;o__UBA12225;f__UBA12225;g__UBA12225;s__UBA12225 sp002347925	285	3608630	0	0	0	0	97.26	100	97.808
GCA_002347925.1_ASM234792v1_genomic	>90% completeness AND <5% contamination	Genbank	d__Bacteria;p__Chloroflexota;c__UBA2235;o__UBA12225;f__UBA12225;g__UBA12225;s__UBA12225 sp002347925	228	3509240	0	0	0	0	88.32	100	90.656
GCA_003670395.1_ASM367039v1_genomic	>90% completeness AND <5% contamination	Genbank	d__Bacteria;p__Chloroflexota;c__UBA2235;o__UBA12225;f__UBA12225;g__UBA12225;s__UBA12225 sp002347925	194	3310850	0	0	0	0	91.46	90	91.168
GCA_017853845.1_ASM1785384v1_genomic	>90% completeness AND <5% contamination	Genbank	d__Bacteria;p__Chloroflexota;c__UBA2235;o__UBA12225;f__UBA12225;g__UBA12225;s__UBA12225 sp002347925	388	2903200	0	0	0	0	91.61	90	91.288
GCA_903832065.1_freshwater_MAG_---_Umea_bin-05786_genomic	>90% completeness AND <5% contamination	Genbank	d__Bacteria;p__Chloroflexota;c__UBA2235;o__UBA12225;f__UBA12225;g__UBA12225;s__UBA12225 sp002347925	829	3822480	0	4.89	18.18	4.001	95.22	90	94.176
GCA_903894745.1_freshwater_MAG_---_Umea1_bin-2684_genomic	>90% completeness AND <5% contamination	Genbank	d__Bacteria;p__Chloroflexota;c__UBA2235;o__UBA12225;f__UBA12225;g__UBA12225;s__UBA12225 sp002347925	891	3754970	0	4.18	100	0	95.22	90	94.176
3300017426_8	>90% completeness AND <5% contamination	Nayfach et al.	d__Bacteria;p__Chloroflexota;c__UBA4733;o__UBA4733;f__UBA4733;g__;s__	309	7742300	0	0	0	0	99.84	100	99.872
GCA_002404055.1_ASM240405v1_genomic	>90% completeness AND <5% contamination	Genbank	d__Bacteria;p__Chloroflexota;c__UBA4733;o__UBA4733;f__UBA4733;g__UBA4733;s__UBA4733 sp002404055	434	7555350	0	3.45	0	3.45	97.65	95	97.12
3300027773_21	>90% completeness AND <5% contamination	Nayfach et al.	d__Bacteria;p__Chloroflexota;c__UBA5177;o__;f__;g__;s__	25	4521790	0	0	0	0	100	100	100
3300027773_37	>90% completeness AND <5% contamination	Nayfach et al.	d__Bacteria;p__Chloroflexota;c__UBA5177;o__UBA5177;f__;g__;s__	12	2978170	0	0	0	0	98.28	100	98.624
3300025503_4	>90% completeness AND <5% contamination	Nayfach et al.	d__Bacteria;p__Chloroflexota;c__UBA6077;o__;f__;g__;s__	71	6477820	0	1.72	0	1.72	99.14	95	98.312
3300027773_18	>90% completeness AND <5% contamination	Nayfach et al.	d__Bacteria;p__Chloroflexota;c__UBA6077;o__UBA6077;f__;g__;s__	63	5192210	0	1.72	0	1.72	99.14	100	99.312
GCA_019686175.1_ASM1968617v1_genomic	>90% completeness AND <5% contamination	Genbank	d__Bacteria;p__Chloroflexota;c__UBA6077;o__UBA6077;f__;g__;s__	425	4358510	0	0.16	100	0	93.1	90	92.48
2.02672e+06	>90% completeness AND <5% contamination	PATRIC	d__Bacteria;p__Chloroflexota;c__UBA6077;o__UBA6077;f__CF-72;g__;s__	261	7875260	0	2.35	33.33	1.56675	95.69	100	96.552
2.02672e+06	>90% completeness AND <5% contamination	PATRIC	d__Bacteria;p__Chloroflexota;c__UBA6077;o__UBA6077;f__CF-72;g__;s__	227	7653400	0	0	0	0	95.22	95	95.176
GCA_019239775.1_ASM1923977v1_genomic	>90% completeness AND <5% contamination	Genbank	d__Bacteria;p__Chloroflexota;c__UBA6077;o__UBA6077;f__CF-72;g__CF-72;s__	507	7205300	0	4.47	50	2.235	94.75	95	94.8
GCA_019247135.1_ASM1924713v1_genomic	>90% completeness AND <5% contamination	Genbank	d__Bacteria;p__Chloroflexota;c__UBA6077;o__UBA6077;f__CF-72;g__CF-72;s__	1149	6920500	0	1.88	0	1.88	95.53	95	95.424
GCA_019247515.1_ASM1924751v1_genomic	>90% completeness AND <5% contamination	Genbank	d__Bacteria;p__Chloroflexota;c__UBA6077;o__UBA6077;f__CF-72;g__CF-72;s__	579	8308320	0	3.61	40	2.166	96.55	95	96.24
GCA_005883405.1_ASM588340v1_genomic	>90% completeness AND <5% contamination	Genbank	d__Bacteria;p__Chloroflexota;c__UBA6077;o__UBA6077;f__CF-72;g__CF-72;s__CF-72 sp005883405	682	6165590	0	3.45	0	3.45	93.81	90	93.048
3300025739_12	>90% completeness AND <5% contamination	Nayfach et al.	d__Bacteria;p__Chloroflexota;c__UBA6077;o__UBA6077;f__UBA6077;g__;s__	328	3005920	0	0.86	100	0	95.69	75	91.552
3300025857_11	>90% completeness AND <5% contamination	Nayfach et al.	d__Bacteria;p__Chloroflexota;c__UBA6077;o__UBA6077;f__UBA6077;g__;s__	279	3101460	0	0.16	0	0.16	97.41	85	94.928
GCA_002436065.1_ASM243606v1_genomic	>90% completeness AND <5% contamination	Genbank	d__Bacteria;p__Chloroflexota;c__UBA6077;o__UBA6077;f__UBA6077;g__UBA6077;s__UBA6077 sp002436065	119	5908190	0	0	0	0	99.14	95	98.312
GCA_005880615.1_ASM588061v1_genomic	>90% completeness AND <5% contamination	Genbank	d__Bacteria;p__Dormibacterota;c__Dormibacteria;o__CF-121;f__CF-121;g__CF-121;s__CF-121 sp005880615	241	3592030	0	0	0	0	96.55	100	97.24
GCA_005881215.1_ASM588121v1_genomic	>90% completeness AND <5% contamination	Genbank	d__Bacteria;p__Dormibacterota;c__Dormibacteria;o__CF-121;f__CF-121;g__CF-13;s__CF-13 sp005881215	255	2790600	0	5.17	100	0	95.69	75	91.552
GCA_005882725.1_ASM588272v1_genomic	>90% completeness AND <5% contamination	Genbank	d__Bacteria;p__Dormibacterota;c__Dormibacteria;o__CF-121;f__CF-121;g__CF-13;s__CF-13 sp005881715	238	2762850	0	1.72	0	1.72	92.24	90	91.792
GCA_005889225.1_ASM588922v1_genomic	>90% completeness AND <5% contamination	Genbank	d__Bacteria;p__Dormibacterota;c__Dormibacteria;o__CF-121;f__CF-121;g__CF-13;s__CF-13 sp005889225	296	2920280	0	0.31	50	0.155	93.1	80	90.48
GCA_005889345.1_ASM588934v1_genomic	>90% completeness AND <5% contamination	Genbank	d__Bacteria;p__Dormibacterota;c__Dormibacteria;o__CF-121;f__CF-121;g__CF-13;s__CF-13 sp005889345	306	3232900	0	1.72	100	0	94.67	85	92.736
GCA_005882775.1_ASM588277v1_genomic	>90% completeness AND <5% contamination	Genbank	d__Bacteria;p__Dormibacterota;c__Dormibacteria;o__CF-121;f__CF-121;g__VBDY01;s__VBDY01 sp005882775	234	2853210	0	0	0	0	99.14	90	97.312
3300025503_35	>90% completeness AND <5% contamination	Nayfach et al.	d__Bacteria;p__Dormibacterota;c__Dormibacteria;o__Dormibacterales;f__;g__;s__	175	1698330	0	0	0	0	91.3	90	91.04
3300017426_29	>90% completeness AND <5% contamination	Nayfach et al.	d__Bacteria;p__Dormibacterota;c__Dormibacteria;o__Dormibacterales;f__Dormibacteraceae;g__40CM-4-65-16;s__	27	3088770	0	0	0	0	100	100	100
GCA_005882115.1_ASM588211v1_genomic	>90% completeness AND <5% contamination	Genbank	d__Bacteria;p__Dormibacterota;c__Dormibacteria;o__Dormibacterales;f__Dormibacteraceae;g__40CM-4-65-16;s__40CM-4-65-16 sp001917775	147	3357100	0	0	0	0	98.28	90	96.624
GCA_005880795.1_ASM588079v1_genomic	>90% completeness AND <5% contamination	Genbank	d__Bacteria;p__Dormibacterota;c__Dormibacteria;o__Dormibacterales;f__Dormibacteraceae;g__40CM-4-65-16;s__40CM-4-65-16 sp005880795	217	3223790	0	0.16	100	0	100	85	97
GCA_005880915.1_ASM588091v1_genomic	>90% completeness AND <5% contamination	Genbank	d__Bacteria;p__Dormibacterota;c__Dormibacteria;o__Dormibacterales;f__Dormibacteraceae;g__40CM-4-65-16;s__40CM-4-65-16 sp005880915	228	4.13256e+06	0	3.45	0	3.45	100	95	99
GCA_005882035.1_ASM588203v1_genomic	>90% completeness AND <5% contamination	Genbank	d__Bacteria;p__Dormibacterota;c__Dormibacteria;o__Dormibacterales;f__Dormibacteraceae;g__40CM-4-65-16;s__40CM-4-65-16 sp005881275	523	2995780	0	1.72	0	1.72	93.97	85	92.176
GCA_005882825.1_ASM588282v1_genomic	>90% completeness AND <5% contamination	Genbank	d__Bacteria;p__Dormibacterota;c__Dormibacteria;o__Dormibacterales;f__Dormibacteraceae;g__40CM-4-65-16;s__40CM-4-65-16 sp005881275	64	3100640	0	3.45	100	0	98.28	90	96.624
GCA_005883805.1_ASM588380v1_genomic	>90% completeness AND <5% contamination	Genbank	d__Bacteria;p__Dormibacterota;c__Dormibacteria;o__Dormibacterales;f__Dormibacteraceae;g__40CM-4-65-16;s__40CM-4-65-16 sp005882545	108	3143770	0	1.72	0	1.72	95.4	95	95.32
GCA_005883575.1_ASM588357v1_genomic	>90% completeness AND <5% contamination	Genbank	d__Bacteria;p__Dormibacterota;c__Dormibacteria;o__Dormibacterales;f__Dormibacteraceae;g__40CM-4-65-16;s__40CM-4-65-16 sp005883575	127	3597140	0	0	0	0	100	85	97
GCA_005887685.1_ASM588768v1_genomic	>90% completeness AND <5% contamination	Genbank	d__Bacteria;p__Dormibacterota;c__Dormibacteria;o__Dormibacterales;f__Dormibacteraceae;g__40CM-4-65-16;s__40CM-4-65-16 sp005887685	264	3053380	0	0.86	100	0	100	85	97
GCA_005887735.1_ASM588773v1_genomic	>90% completeness AND <5% contamination	Genbank	d__Bacteria;p__Dormibacterota;c__Dormibacteria;o__Dormibacterales;f__Dormibacteraceae;g__40CM-4-65-16;s__40CM-4-65-16 sp005887735	343	2705090	0	0.57	100	0	87.55	100	90.04
GCA_005889085.1_ASM588908v1_genomic	>90% completeness AND <5% contamination	Genbank	d__Bacteria;p__Dormibacterota;c__Dormibacteria;o__Dormibacterales;f__Dormibacteraceae;g__40CM-4-65-16;s__40CM-4-65-16 sp005889085	260	2797430	0	3.45	100	0	94.83	80	91.864
GCA_005889135.1_ASM588913v1_genomic	>90% completeness AND <5% contamination	Genbank	d__Bacteria;p__Dormibacterota;c__Dormibacteria;o__Dormibacterales;f__Dormibacteraceae;g__40CM-4-65-16;s__40CM-4-65-16 sp005889135	221	2952700	0	0	0	0	100	90	98
GCA_005889495.1_ASM588949v1_genomic	>90% completeness AND <5% contamination	Genbank	d__Bacteria;p__Dormibacterota;c__Dormibacteria;o__Dormibacterales;f__Dormibacteraceae;g__40CM-4-65-16;s__40CM-4-65-16 sp005889495	201	2730460	0	3.45	50	1.725	93.94	85	92.152
GCA_005881825.1_ASM588182v1_genomic	>90% completeness AND <5% contamination	Genbank	d__Bacteria;p__Dormibacterota;c__Dormibacteria;o__Dormibacterales;f__Dormibacteraceae;g__CF-28;s__CF-28 sp005881825	158	3094390	0	0	0	0	92.79	95	93.232
GCA_016464725.1_ASM1646472v1_genomic	>90% completeness AND <5% contamination	Genbank	d__Bacteria;p__Dormibacterota;c__Dormibacteria;o__Dormibacterales;f__Dormibacteraceae;g__Dormibacter;s__	40	3101760	0	0	0	0	98.28	95	97.624
GCA_003244185.1_ASM324418v1_genomic	>90% completeness AND <5% contamination	Genbank	d__Bacteria;p__Dormibacterota;c__Dormibacteria;o__Dormibacterales;f__Dormibacteraceae;g__Dormibacter;s__Dormibacter sp003244185	71	2960890	0	0	0	0	98.28	95	97.624
GCA_003151935.1_20120700_P3D_genomic	>90% completeness AND <5% contamination	Genbank	d__Bacteria;p__Dormibacterota;c__Dormibacteria;o__Dormibacterales;f__Dormibacteraceae;g__Palsa-870;s__Palsa-870 sp003151935	97	2938600	0	0.16	0	0.16	99.22	95	98.376
GCA_003169845.1_20110800_P1D_genomic	>90% completeness AND <5% contamination	Genbank	d__Bacteria;p__Dormibacterota;c__Dormibacteria;o__Dormibacterales;f__Dormibacteraceae;g__Palsa-870;s__Palsa-870 sp003169845	29	3694460	0	0	0	0	99.69	95	98.752
3300025664_15	>90% completeness AND <5% contamination	Nayfach et al.	d__Bacteria;p__Dormibacterota;c__Dormibacteria;o__Dormibacterales;f__Dormibacteraceae;g__Palsa-872;s__Palsa-872 sp003139695	139	3110110	0	0	0	0	100	100	100
GCA_003139695.1_20110800_P1M_genomic	>90% completeness AND <5% contamination	Genbank	d__Bacteria;p__Dormibacterota;c__Dormibacteria;o__Dormibacterales;f__Dormibacteraceae;g__Palsa-872;s__Palsa-872 sp003139695	34	3298280	0	0	0	0	100	100	100
GCA_005880945.1_ASM588094v1_genomic	>90% completeness AND <5% contamination	Genbank	d__Bacteria;p__Dormibacterota;c__Dormibacteria;o__Dormibacterales;f__Dormibacteraceae;g__Palsa-872;s__Palsa-872 sp005880945	259	3336120	0	1.72	0	1.72	100	100	100
GCA_016464775.1_ASM1646477v1_genomic	>90% completeness AND <5% contamination	Genbank	d__Bacteria;p__Dormibacterota;c__Dormibacteria;o__Dormibacterales;f__Dormibacteraceae;g__QHBS01;s__QHBS01 sp003243885	76	4520220	0	1.72	0	1.72	97.41	95	96.928
3300027645_7	>90% completeness AND <5% contamination	Nayfach et al.	d__Bacteria;p__Dormibacterota;c__Dormibacteria;o__Dormibacterales;f__Dormibacteraceae;g__UBA10449;s__	29	2468890	0	0	0	0	93.1	90	92.48
GCA_005883585.1_ASM588358v1_genomic	>90% completeness AND <5% contamination	Genbank	d__Bacteria;p__Dormibacterota;c__Dormibacteria;o__Dormibacterales;f__Dormibacteraceae;g__UBA10449;s__UBA10449 sp001917895	188	2845390	0	1.88	0	1.88	94.83	85	92.864
GCA_005880315.1_ASM588031v1_genomic	>90% completeness AND <5% contamination	Genbank	d__Bacteria;p__Dormibacterota;c__Dormibacteria;o__Dormibacterales;f__Dormibacteraceae;g__UBA10449;s__UBA10449 sp005880315	258	3249290	0	1.72	100	0	95.06	70	90.048
GCA_005880695.1_ASM588069v1_genomic	>90% completeness AND <5% contamination	Genbank	d__Bacteria;p__Dormibacterota;c__Dormibacteria;o__Dormibacterales;f__Dormibacteraceae;g__VBGR01;s__VBGR01 sp005880695	111	2824470	0	0	0	0	98.28	100	98.624
GCA_013044295.1_ASM1304429v1_genomic	>90% completeness AND <5% contamination	Genbank	d__Bacteria;p__Dormibacterota;c__Dormibacteria;o__UBA8260;f__Bog-877;g__AG-12;s__AG-12 sp013044295	226	2296130	0	1.72	0	1.72	96.55	95	96.24
3300017426_34	>90% completeness AND <5% contamination	Nayfach et al.	d__Bacteria;p__Dormibacterota;c__Dormibacteria;o__UBA8260;f__Bog-877;g__Bog-877;s__	158	2402890	0	0	0	0	89.66	95	90.728
GCA_003132265.1_20120500_P26_genomic	>90% completeness AND <5% contamination	Genbank	d__Bacteria;p__Dormibacterota;c__Dormibacteria;o__UBA8260;f__Bog-877;g__Bog-877;s__Bog-877 sp003132265	233	2278670	0	0	0	0	89.34	100	91.472
GCA_016464795.1_ASM1646479v1_genomic	>90% completeness AND <5% contamination	Genbank	d__Bacteria;p__Dormibacterota;c__Dormibacteria;o__UBA8260;f__UBA8260;g__;s__	72	2923700	0	0	0	0	99.14	90	97.312
GCA_005880985.1_ASM588098v1_genomic	>90% completeness AND <5% contamination	Genbank	d__Bacteria;p__Dormibacterota;c__Dormibacteria;o__UBA8260;f__UBA8260;g__CF-134;s__CF-134 sp005880985	29	3300760	0	0	0	0	99.14	100	99.312
GCA_019245575.1_ASM1924557v1_genomic	>90% completeness AND <5% contamination	Genbank	d__Bacteria;p__Dormibacterota;c__Dormibacteria;o__UBA8260;f__UBA8260;g__CF-75;s__	46	2602760	0	0	0	0	98.28	95	97.624
GCA_005889335.1_ASM588933v1_genomic	>90% completeness AND <5% contamination	Genbank	d__Bacteria;p__Dormibacterota;c__Dormibacteria;o__UBA8260;f__UBA8260;g__CF-75;s__CF-75 sp005880445	240	2245960	0	1.72	100	0	99.14	95	98.312
GCA_003131685.1_20120500_P32_genomic	>90% completeness AND <5% contamination	Genbank	d__Bacteria;p__Dormibacterota;c__Dormibacteria;o__UBA8260;f__UBA8260;g__Palsa-851;s__Palsa-851 sp003131685	210	3782900	0	1.72	0	1.72	89.5	95	90.6
GCA_003132525.1_20120500_P23_genomic	>90% completeness AND <5% contamination	Genbank	d__Bacteria;p__Dormibacterota;c__Dormibacteria;o__UBA8260;f__UBA8260;g__Palsa-851;s__Palsa-851 sp003132525	113	3204560	0	0	0	0	98.12	85	95.496
GCA_003132805.1_20120500_P15_genomic	>90% completeness AND <5% contamination	Genbank	d__Bacteria;p__Dormibacterota;c__Dormibacteria;o__UBA8260;f__UBA8260;g__Palsa-851;s__Palsa-851 sp003132805	109	2623730	0	0	0	0	91.93	85	90.544
GCA_003135895.1_20111000_P3M_genomic	>90% completeness AND <5% contamination	Genbank	d__Bacteria;p__Dormibacterota;c__Dormibacteria;o__UBA8260;f__UBA8260;g__Palsa-851;s__Palsa-851 sp003135895	211	3600010	0	0	0	0	95.27	90	94.216
GCA_003153505.1_20120700_P3D_genomic	>90% completeness AND <5% contamination	Genbank	d__Bacteria;p__Dormibacterota;c__Dormibacteria;o__UBA8260;f__UBA8260;g__Palsa-851;s__Palsa-851 sp003153505	74	3955710	0	0	0	0	100	95	99
GCA_003167435.1_20110700_P2D_genomic	>90% completeness AND <5% contamination	Genbank	d__Bacteria;p__Dormibacterota;c__Dormibacteria;o__UBA8260;f__UBA8260;g__Palsa-851;s__Palsa-851 sp003153505	311	3543500	0	5.17	60	2.068	91.07	90	90.856
GCA_003162415.1_20110600_P1M_genomic	>90% completeness AND <5% contamination	Genbank	d__Bacteria;p__Dormibacterota;c__Dormibacteria;o__UBA8260;f__UBA8260;g__Palsa-851;s__Palsa-851 sp003162415	22	3694350	0	0	0	0	98.98	100	99.184
3300026291_14	>90% completeness AND <5% contamination	Nayfach et al.	d__Bacteria;p__Dormibacterota;c__Dormibacteria;o__UBA8260;f__UBA8260;g__Palsa-875;s__	169	2259430	0	0	0	0	95.69	95	95.552
GCA_003153125.1_20120700_P3D_genomic	>90% completeness AND <5% contamination	Genbank	d__Bacteria;p__Dormibacterota;c__Dormibacteria;o__UBA8260;f__UBA8260;g__Palsa-875;s__Palsa-875 sp003153125	130	3018040	0	0	0	0	91.61	85	90.288
GCA_003142035.1_20120800_E1D_genomic	>90% completeness AND <5% contamination	Genbank	d__Bacteria;p__Dormibacterota;c__Dormibacteria;o__UBA8260;f__UBA8260;g__UBA8260;s__UBA8260 sp003142035	144	2554780	0	0.16	0	0.16	92.24	100	93.792
GCA_003170875.1_20110800_E2D_genomic	>90% completeness AND <5% contamination	Genbank	d__Bacteria;p__Dormibacterota;c__Dormibacteria;o__UBA8260;f__UBA8260;g__UBA8260;s__UBA8260 sp003170875	258	3026790	0	1.72	0	1.72	89.66	95	90.728
3300020057_26	50-90% completeness AND/OR 5-10% contamination	Nayfach et al.	d__Bacteria;p__Chloroflexota_A;c__Ellin6529;o__CSP1-4;f__CSP1-4;g__;s__	375	2461820	0	4.47	50	2.235	70.69	90	74.552
3300020213_31	50-90% completeness AND/OR 5-10% contamination	Nayfach et al.	d__Bacteria;p__Chloroflexota_A;c__Ellin6529;o__CSP1-4;f__CSP1-4;g__;s__	352	2329770	0	2.3	100	0	63.79	80	67.032
3300025481_13	50-90% completeness AND/OR 5-10% contamination	Nayfach et al.	d__Bacteria;p__Chloroflexota_A;c__Ellin6529;o__CSP1-4;f__CSP1-4;g__;s__	348	2605190	0	0	0	0	72.29	90	75.832
3300025864_29	50-90% completeness AND/OR 5-10% contamination	Nayfach et al.	d__Bacteria;p__Chloroflexota_A;c__Ellin6529;o__CSP1-4;f__CSP1-4;g__;s__	308	1883650	0	0	0	0	64.03	60	63.224
3300027858_28	50-90% completeness AND/OR 5-10% contamination	Nayfach et al.	d__Bacteria;p__Chloroflexota_A;c__Ellin6529;o__CSP1-4;f__CSP1-4;g__Palsa-1032;s__	506	3118280	0	2.9	60	1.16	84.09	75	82.272
3300027878_97	50-90% completeness AND/OR 5-10% contamination	Nayfach et al.	d__Bacteria;p__Chloroflexota_A;c__Ellin6529;o__CSP1-4;f__CSP1-4;g__Palsa-1032;s__	458	2229110	0	4.6	0	4.6	54.55	65	56.64
3300015063_3	50-90% completeness AND/OR 5-10% contamination	Nayfach et al.	d__Bacteria;p__Chloroflexota_A;c__Ellin6529;o__CSP1-4;f__CSP1-4;g__UBA5189;s__	307	1684570	0	0	0	0	57.42	85	62.936
3300013286_14	50-90% completeness AND/OR 5-10% contamination	Nayfach et al.	d__Bacteria;p__Chloroflexota_A;c__Ellin6529;o__CSP1-4;f__UBA10416;g__UBA10416;s__	117	1.03215e+06	0	0	0	0	87.62	85	87.096
3300017453_36	50-90% completeness AND/OR 5-10% contamination	Nayfach et al.	d__Bacteria;p__Chloroflexota_A;c__Ellin6529;o__CSP1-4;f__UBA10416;g__UBA10416;s__	19	787620	0	0	0	0	84.48	95	86.584
3300027114_15	50-90% completeness AND/OR 5-10% contamination	Nayfach et al.	d__Bacteria;p__Chloroflexota_A;c__Ellin6529;o__CSP1-4;f__UBA10416;g__UBA10416;s__	113	868980	0	1.88	100	0	72.26	90	75.808
3300027688_34	50-90% completeness AND/OR 5-10% contamination	Nayfach et al.	d__Bacteria;p__Chloroflexota_A;c__Ellin6529;o__CSP1-4;f__UBA10416;g__UBA10416;s__	101	923020	0	0.16	0	0.16	80.09	90	82.072
3300027720_40	50-90% completeness AND/OR 5-10% contamination	Nayfach et al.	d__Bacteria;p__Chloroflexota_A;c__Ellin6529;o__CSP1-4;f__UBA10416;g__UBA10416;s__	128	862230	0	0	0	0	72.41	90	75.928
3300027744_84	50-90% completeness AND/OR 5-10% contamination	Nayfach et al.	d__Bacteria;p__Chloroflexota_A;c__Ellin6529;o__CSP1-4;f__UBA10416;g__UBA10416;s__	27	466570	0	0	0	0	55.33	75	59.264
3300027754_55	50-90% completeness AND/OR 5-10% contamination	Nayfach et al.	d__Bacteria;p__Chloroflexota_A;c__Ellin6529;o__CSP1-4;f__UBA10416;g__UBA10416;s__	118	978620	0	3.1	60	1.24	87.93	95	89.344
3300027770_92	50-90% completeness AND/OR 5-10% contamination	Nayfach et al.	d__Bacteria;p__Chloroflexota_A;c__Ellin6529;o__CSP1-4;f__UBA10416;g__UBA10416;s__	92	542860	0	0	0	0	69.44	70	69.552
3300027777_60	50-90% completeness AND/OR 5-10% contamination	Nayfach et al.	d__Bacteria;p__Chloroflexota_A;c__Ellin6529;o__CSP1-4;f__UBA10416;g__UBA10416;s__	103	953780	0	3.45	100	0	81.74	90	83.392
3300027971_34	50-90% completeness AND/OR 5-10% contamination	Nayfach et al.	d__Bacteria;p__Chloroflexota_A;c__Ellin6529;o__CSP1-4;f__UBA10416;g__UBA10416;s__	131	1115880	0	1.72	100	0	89.89	90	89.912
3300015079_3	50-90% completeness AND/OR 5-10% contamination	Nayfach et al.	d__Bacteria;p__Chloroflexota_A;c__Ellin6529;o__P2-11E;f__P2-11E;g__;s__	203	2.09651e+06	0	3.61	100	0	63.09	80	66.472
3300027638_9	50-90% completeness AND/OR 5-10% contamination	Nayfach et al.	d__Bacteria;p__Chloroflexota_A;c__Ellin6529;o__QHBO01;f__QHBO01;g__;s__	40	2152380	0	0	0	0	79.31	85	80.448
3300012005_26	50-90% completeness AND/OR 5-10% contamination	Nayfach et al.	d__Bacteria;p__Chloroflexota_A;c__Ellin6529;o__QHBO01;f__QHBO01;g__QHBO01;s__	155	1176140	0	2.59	33.33	1.72675	68.65	60	66.92
3300027847_58	50-90% completeness AND/OR 5-10% contamination	Nayfach et al.	d__Bacteria;p__Chloroflexota_B;c__UBA11872;o__UBA11872;f__;g__;s__	257	1841340	0	1.72	0	1.72	60.06	85	65.048
3300005529_81	50-90% completeness AND/OR 5-10% contamination	Nayfach et al.	d__Bacteria;p__Chloroflexota;c__;o__;f__;g__;s__	27	2768710	0	0	0	0	79.31	85	80.448
3300000362_32	50-90% completeness AND/OR 5-10% contamination	Nayfach et al.	d__Bacteria;p__Chloroflexota;c__Anaerolineae;o__;f__;g__;s__	144	1883640	0	0	0	0	67.24	65	66.792
3300000426_3	50-90% completeness AND/OR 5-10% contamination	Nayfach et al.	d__Bacteria;p__Chloroflexota;c__Anaerolineae;o__;f__;g__;s__	272	2436480	0	0	0	0	71.39	60	69.112
3300000463_1	50-90% completeness AND/OR 5-10% contamination	Nayfach et al.	d__Bacteria;p__Chloroflexota;c__Anaerolineae;o__;f__;g__;s__	565	3746550	0	2.9	75	0.725	79.31	85	80.448
3300001095_18	50-90% completeness AND/OR 5-10% contamination	Nayfach et al.	d__Bacteria;p__Chloroflexota;c__Anaerolineae;o__;f__;g__;s__	427	2336110	0	1.02	50	0.51	58.07	80	62.456
3300005101_3	50-90% completeness AND/OR 5-10% contamination	Nayfach et al.	d__Bacteria;p__Chloroflexota;c__Anaerolineae;o__;f__;g__;s__	412	3021000	0	0.34	0	0.34	74.84	80	75.872
3300005298_7	50-90% completeness AND/OR 5-10% contamination	Nayfach et al.	d__Bacteria;p__Chloroflexota;c__Anaerolineae;o__;f__;g__;s__	232	2317590	0	1.72	100	0	73.35	90	76.68
3300007776_5	50-90% completeness AND/OR 5-10% contamination	Nayfach et al.	d__Bacteria;p__Chloroflexota;c__Anaerolineae;o__;f__;g__;s__	316	3271170	0	1.72	0	1.72	89	60	83.2
3300009503_62	50-90% completeness AND/OR 5-10% contamination	Nayfach et al.	d__Bacteria;p__Chloroflexota;c__Anaerolineae;o__;f__;g__;s__	342	2943420	0	1.72	0	1.72	85.74	85	85.592
3300009503_72	50-90% completeness AND/OR 5-10% contamination	Nayfach et al.	d__Bacteria;p__Chloroflexota;c__Anaerolineae;o__;f__;g__;s__	421	2784920	0	6.03	25	4.5225	77.59	85	79.072
3300009566_15	50-90% completeness AND/OR 5-10% contamination	Nayfach et al.	d__Bacteria;p__Chloroflexota;c__Anaerolineae;o__;f__;g__;s__	440	2693200	0	1.72	0	1.72	63.01	80	66.408
3300009773_25	50-90% completeness AND/OR 5-10% contamination	Nayfach et al.	d__Bacteria;p__Chloroflexota;c__Anaerolineae;o__;f__;g__;s__	377	2673740	0	6.9	25	5.175	83.12	95	85.496
3300012533_55	50-90% completeness AND/OR 5-10% contamination	Nayfach et al.	d__Bacteria;p__Chloroflexota;c__Anaerolineae;o__;f__;g__;s__	488	3059330	0	6.9	20	5.52	65.36	95	71.288
3300014913_20	50-90% completeness AND/OR 5-10% contamination	Nayfach et al.	d__Bacteria;p__Chloroflexota;c__Anaerolineae;o__;f__;g__;s__	312	1867440	0	0	0	0	82.6	70	80.08
3300017431_13	50-90% completeness AND/OR 5-10% contamination	Nayfach et al.	d__Bacteria;p__Chloroflexota;c__Anaerolineae;o__;f__;g__;s__	584	3462510	0	0.47	25	0.3525	82.76	80	82.208
3300017452_10	50-90% completeness AND/OR 5-10% contamination	Nayfach et al.	d__Bacteria;p__Chloroflexota;c__Anaerolineae;o__;f__;g__;s__	220	3646420	0	3.45	0	3.45	87.93	95	89.344
3300017452_14	50-90% completeness AND/OR 5-10% contamination	Nayfach et al.	d__Bacteria;p__Chloroflexota;c__Anaerolineae;o__;f__;g__;s__	409	2966720	0	0.31	100	0	74.84	85	76.872
3300017452_15	50-90% completeness AND/OR 5-10% contamination	Nayfach et al.	d__Bacteria;p__Chloroflexota;c__Anaerolineae;o__;f__;g__;s__	289	2804330	0	0	0	0	71.63	95	76.304
3300017470_18	50-90% completeness AND/OR 5-10% contamination	Nayfach et al.	d__Bacteria;p__Chloroflexota;c__Anaerolineae;o__;f__;g__;s__	148	2517310	0	0	0	0	89.18	90	89.344
3300017990_27	50-90% completeness AND/OR 5-10% contamination	Nayfach et al.	d__Bacteria;p__Chloroflexota;c__Anaerolineae;o__;f__;g__;s__	544	3095940	0	0.16	0	0.16	56.39	85	62.112
3300021507_3	50-90% completeness AND/OR 5-10% contamination	Nayfach et al.	d__Bacteria;p__Chloroflexota;c__Anaerolineae;o__;f__;g__;s__	415	2605140	0	0	0	0	79.31	80	79.448
3300025094_40	50-90% completeness AND/OR 5-10% contamination	Nayfach et al.	d__Bacteria;p__Chloroflexota;c__Anaerolineae;o__;f__;g__;s__	362	1827480	0	0	0	0	64.58	60	63.664
3300025861_11	50-90% completeness AND/OR 5-10% contamination	Nayfach et al.	d__Bacteria;p__Chloroflexota;c__Anaerolineae;o__;f__;g__;s__	598	4402080	0	3.45	0	3.45	78.45	90	80.76
3300026195_14	50-90% completeness AND/OR 5-10% contamination	Nayfach et al.	d__Bacteria;p__Chloroflexota;c__Anaerolineae;o__;f__;g__;s__	413	2620310	0	3.45	0	3.45	66.77	70	67.416
3300026293_22	50-90% completeness AND/OR 5-10% contamination	Nayfach et al.	d__Bacteria;p__Chloroflexota;c__Anaerolineae;o__;f__;g__;s__	384	2546180	0	1.88	100	0	75.75	85	77.6
3300026531_27	50-90% completeness AND/OR 5-10% contamination	Nayfach et al.	d__Bacteria;p__Chloroflexota;c__Anaerolineae;o__;f__;g__;s__	287	1637490	0	2.23	33.33	1.48674	62.07	75	64.656
3300027858_14	50-90% completeness AND/OR 5-10% contamination	Nayfach et al.	d__Bacteria;p__Chloroflexota;c__Anaerolineae;o__;f__;g__;s__	713	5098990	0	3.45	0	3.45	85.71	85	85.568
3300028030_21	50-90% completeness AND/OR 5-10% contamination	Nayfach et al.	d__Bacteria;p__Chloroflexota;c__Anaerolineae;o__;f__;g__;s__	242	1569770	0	0.16	0	0.16	68.03	75	69.424
GCA_005880535.1_ASM588053v1_genomic	50-90% completeness AND/OR 5-10% contamination	Genbank	d__Bacteria;p__Chloroflexota;c__Anaerolineae;o__;f__;g__;s__	591	2162980	0	0	0	0	70.22	40	64.176
GCA_012961855.1_ASM1296185v1_genomic	50-90% completeness AND/OR 5-10% contamination	Genbank	d__Bacteria;p__Chloroflexota;c__Anaerolineae;o__;f__;g__;s__	683	2202410	0.966214	0	0	0	73.19	50	68.552
GCA_015484665.1_ASM1548466v1_genomic	50-90% completeness AND/OR 5-10% contamination	Genbank	d__Bacteria;p__Chloroflexota;c__Anaerolineae;o__;f__;g__;s__	733	2861060	0	0.16	0	0.16	67.12	85	70.696
GCA_018263655.1_ASM1826365v1_genomic	50-90% completeness AND/OR 5-10% contamination	Genbank	d__Bacteria;p__Chloroflexota;c__Anaerolineae;o__;f__;g__;s__	401	3832830	0	0	0	0	82.6	70	80.08
GCA_018824285.1_ASM1882428v1_genomic	50-90% completeness AND/OR 5-10% contamination	Genbank	d__Bacteria;p__Chloroflexota;c__Anaerolineae;o__;f__;g__;s__	906	2994250	0	0.16	0	0.16	62.63	80	66.104
3300017992_22	50-90% completeness AND/OR 5-10% contamination	Nayfach et al.	d__Bacteria;p__Chloroflexota;c__Anaerolineae;o__4572-78;f__;g__;s__	662	4.13098e+06	0	0	0	0	69.75	75	70.8
3300018065_21	50-90% completeness AND/OR 5-10% contamination	Nayfach et al.	d__Bacteria;p__Chloroflexota;c__Anaerolineae;o__4572-78;f__;g__;s__	651	4654030	0	0	0	0	75.86	95	79.688
GCA_002084875.1_ASM208487v1_genomic	50-90% completeness AND/OR 5-10% contamination	Genbank	d__Bacteria;p__Chloroflexota;c__Anaerolineae;o__4572-78;f__4572-78;g__4572-78;s__4572-78 sp002084875	252	4104200	0	0	0	0	87.07	95	88.656
GCA_003695385.1_ASM369538v1_genomic	50-90% completeness AND/OR 5-10% contamination	Genbank	d__Bacteria;p__Chloroflexota;c__Anaerolineae;o__4572-78;f__4572-78;g__DUEH01;s__	1206	3580140	0	0.34	100	0	79.86	35	70.888
GCA_011192195.1_ASM1119219v1_genomic	50-90% completeness AND/OR 5-10% contamination	Genbank	d__Bacteria;p__Chloroflexota;c__Anaerolineae;o__4572-78;f__4572-78;g__DUEH01;s__DUEH01 sp011192195	301	3231410	0	0	0	0	66.3	75	68.04
133454	50-90% completeness AND/OR 5-10% contamination	PATRIC	d__Bacteria;p__Chloroflexota;c__Anaerolineae;o__4572-78;f__J111;g__DSQQ01;s__	768	5383010	0	0	0	0	94.83	70	89.864
2.02672e+06	50-90% completeness AND/OR 5-10% contamination	PATRIC	d__Bacteria;p__Chloroflexota;c__Anaerolineae;o__4572-78;f__J111;g__DSQQ01;s__	397	4444500	0	0	0	0	57.92	100	66.336
2.05214e+06	50-90% completeness AND/OR 5-10% contamination	PATRIC	d__Bacteria;p__Chloroflexota;c__Anaerolineae;o__4572-78;f__J111;g__DSQQ01;s__	899	3434400	0.240799	0	0	0	56.27	35	52.016
GCA_016178315.1_ASM1617831v1_genomic	50-90% completeness AND/OR 5-10% contamination	Genbank	d__Bacteria;p__Chloroflexota;c__Anaerolineae;o__4572-78;f__J111;g__DSQQ01;s__	1142	5932050	0	1.72	0	1.72	51.63	60	53.304
2.0249e+06	50-90% completeness AND/OR 5-10% contamination	PATRIC	d__Bacteria;p__Chloroflexota;c__Anaerolineae;o__4572-78;f__J111;g__J095;s__	104	5263160	0	1.72	100	0	53.45	80	58.76
2.05214e+06	50-90% completeness AND/OR 5-10% contamination	PATRIC	d__Bacteria;p__Chloroflexota;c__Anaerolineae;o__4572-78;f__J111;g__J095;s__	1178	7604530	0	0.86	100	0	67.87	65	67.296
2.05214e+06	50-90% completeness AND/OR 5-10% contamination	PATRIC	d__Bacteria;p__Chloroflexota;c__Anaerolineae;o__4572-78;f__J111;g__J095;s__	1248	9775670	0.0775394	0	0	0	89.03	90	89.224
2.05214e+06	50-90% completeness AND/OR 5-10% contamination	PATRIC	d__Bacteria;p__Chloroflexota;c__Anaerolineae;o__4572-78;f__J111;g__J095;s__	1523	8591760	0.114528	0	0	0	79.06	70	77.248
2.05214e+06	50-90% completeness AND/OR 5-10% contamination	PATRIC	d__Bacteria;p__Chloroflexota;c__Anaerolineae;o__4572-78;f__J111;g__J095;s__	1139	9012920	0	0	0	0	92.95	75	89.36
2.05214e+06	50-90% completeness AND/OR 5-10% contamination	PATRIC	d__Bacteria;p__Chloroflexota;c__Anaerolineae;o__4572-78;f__J111;g__J095;s__	1446	6680450	0.0965504	0.16	0	0.16	84.01	70	81.208
2.05214e+06	50-90% completeness AND/OR 5-10% contamination	PATRIC	d__Bacteria;p__Chloroflexota;c__Anaerolineae;o__4572-78;f__J111;g__J095;s__	1509	5698050	0.0426462	0.16	0	0.16	69.67	70	69.736
2.07312e+06	50-90% completeness AND/OR 5-10% contamination	PATRIC	d__Bacteria;p__Chloroflexota;c__Anaerolineae;o__4572-78;f__J111;g__J095;s__	114	6178540	6.45687	0	0	0	55.96	85	61.768
GCA_003695455.1_ASM369545v1_genomic	50-90% completeness AND/OR 5-10% contamination	Genbank	d__Bacteria;p__Chloroflexota;c__Anaerolineae;o__4572-78;f__J111;g__J095;s__J095 sp003695455	929	4378690	0	0	0	0	90.05	70	86.04
GCA_003694775.1_ASM369477v1_genomic	50-90% completeness AND/OR 5-10% contamination	Genbank	d__Bacteria;p__Chloroflexota;c__Anaerolineae;o__4572-78;f__J111;g__J111;s__J111 sp003694775	791	4062860	0	0	0	0	82.76	45	75.208
GCA_014382415.1_ASM1438241v1_genomic	50-90% completeness AND/OR 5-10% contamination	Genbank	d__Bacteria;p__Chloroflexota;c__Anaerolineae;o__4572-78;f__NAK82;g__;s__	866	3341560	0	3.45	0	3.45	64.97	80	67.976
GCA_020343875.1_ASM2034387v1_genomic	50-90% completeness AND/OR 5-10% contamination	Genbank	d__Bacteria;p__Chloroflexota;c__Anaerolineae;o__4572-78;f__NAK82;g__;s__	1	5353880	0	0	0	0	93.1	75	89.48
GCA_011368475.1_ASM1136847v1_genomic	50-90% completeness AND/OR 5-10% contamination	Genbank	d__Bacteria;p__Chloroflexota;c__Anaerolineae;o__4572-78;f__NAK82;g__DSVE01;s__DSVE01 sp011368475	411	2840360	0	1.02	0	1.02	48.43	75	53.744
3300002053_59	50-90% completeness AND/OR 5-10% contamination	Nayfach et al.	d__Bacteria;p__Chloroflexota;c__Anaerolineae;o__Anaerolineales;f__;g__;s__	180	1645840	0	0	0	0	63.17	65	63.536
3300013123_29	50-90% completeness AND/OR 5-10% contamination	Nayfach et al.	d__Bacteria;p__Chloroflexota;c__Anaerolineae;o__Anaerolineales;f__;g__;s__	509	3348880	0	0	0	0	85.27	85	85.216
3300013125_33	50-90% completeness AND/OR 5-10% contamination	Nayfach et al.	d__Bacteria;p__Chloroflexota;c__Anaerolineae;o__Anaerolineales;f__;g__;s__	532	3196390	0	3.45	100	0	72.51	70	72.008
3300021471_15	50-90% completeness AND/OR 5-10% contamination	Nayfach et al.	d__Bacteria;p__Chloroflexota;c__Anaerolineae;o__Anaerolineales;f__;g__;s__	365	2276780	1.87502	2.38	25	1.785	73.28	85	75.624
3300021561_52	50-90% completeness AND/OR 5-10% contamination	Nayfach et al.	d__Bacteria;p__Chloroflexota;c__Anaerolineae;o__Anaerolineales;f__;g__;s__	300	1923860	2.64728	0	0	0	61.8	35	56.44
3300021843_40	50-90% completeness AND/OR 5-10% contamination	Nayfach et al.	d__Bacteria;p__Chloroflexota;c__Anaerolineae;o__Anaerolineales;f__;g__;s__	83	2461350	0	1.72	0	1.72	82.76	90	84.208
3300024433_17	50-90% completeness AND/OR 5-10% contamination	Nayfach et al.	d__Bacteria;p__Chloroflexota;c__Anaerolineae;o__Anaerolineales;f__;g__;s__	448	3505750	2.57662	1.88	50	0.94	80.07	75	79.056
3300027897_59	50-90% completeness AND/OR 5-10% contamination	Nayfach et al.	d__Bacteria;p__Chloroflexota;c__Anaerolineae;o__Anaerolineales;f__;g__;s__	282	1613530	0	1.88	100	0	70.22	55	67.176
3300028400_45	50-90% completeness AND/OR 5-10% contamination	Nayfach et al.	d__Bacteria;p__Chloroflexota;c__Anaerolineae;o__Anaerolineales;f__;g__;s__	227	1294100	0.758829	0	0	0	61.44	80	65.152
GCA_016223125.1_ASM1622312v1_genomic	50-90% completeness AND/OR 5-10% contamination	Genbank	d__Bacteria;p__Chloroflexota;c__Anaerolineae;o__Anaerolineales;f__;g__;s__	726	4011530	0	6.9	100	0	79.31	90	81.448
1.87252e+06	50-90% completeness AND/OR 5-10% contamination	PATRIC	d__Bacteria;p__Chloroflexota;c__Anaerolineae;o__Anaerolineales;f__Anaerolineaceae;g__;s__	168	1832790	1.09123	0	0	0	67.24	80	69.792
3300009566_20	50-90% completeness AND/OR 5-10% contamination	Nayfach et al.	d__Bacteria;p__Chloroflexota;c__Anaerolineae;o__Anaerolineales;f__Anaerolineaceae;g__;s__	17	2524860	2.29676	0	0	0	84.48	95	86.584
3300029781_11	50-90% completeness AND/OR 5-10% contamination	Nayfach et al.	d__Bacteria;p__Chloroflexota;c__Anaerolineae;o__Anaerolineales;f__Anaerolineaceae;g__;s__	105	2219260	4.12525	0	0	0	78.53	95	81.824
GCA_011328965.1_ASM1132896v1_genomic	50-90% completeness AND/OR 5-10% contamination	Genbank	d__Bacteria;p__Chloroflexota;c__Anaerolineae;o__Anaerolineales;f__Anaerolineaceae;g__;s__	22	2162150	0	0	0	0	53.45	65	55.76
GCA_016865975.1_JGI_2017-08-21_genomic	50-90% completeness AND/OR 5-10% contamination	Genbank	d__Bacteria;p__Chloroflexota;c__Anaerolineae;o__Anaerolineales;f__Anaerolineaceae;g__;s__	503	1978020	2.20422	2.59	33.33	1.72675	80.09	95	83.072
GCA_016927865.1_ASM1692786v1_genomic	50-90% completeness AND/OR 5-10% contamination	Genbank	d__Bacteria;p__Chloroflexota;c__Anaerolineae;o__Anaerolineales;f__Anaerolineaceae;g__;s__	147	3968490	1.28386	0.86	0	0.86	87.07	100	89.656
GCA_016932185.1_ASM1693218v1_genomic	50-90% completeness AND/OR 5-10% contamination	Genbank	d__Bacteria;p__Chloroflexota;c__Anaerolineae;o__Anaerolineales;f__Anaerolineaceae;g__;s__	275	3045480	1.49861	5.09	11.11	4.5245	79	80	79.2
GCA_016936755.1_ASM1693675v1_genomic	50-90% completeness AND/OR 5-10% contamination	Genbank	d__Bacteria;p__Chloroflexota;c__Anaerolineae;o__Anaerolineales;f__Anaerolineaceae;g__;s__	144	2288620	3.12503	0	0	0	84.48	85	84.584
GCA_017996955.1_ASM1799695v1_genomic	50-90% completeness AND/OR 5-10% contamination	Genbank	d__Bacteria;p__Chloroflexota;c__Anaerolineae;o__Anaerolineales;f__Anaerolineaceae;g__;s__	275	1975210	0.83586	0	0	0	75.39	85	77.312
GCA_021160025.1_ASM2116002v1_genomic	50-90% completeness AND/OR 5-10% contamination	Genbank	d__Bacteria;p__Chloroflexota;c__Anaerolineae;o__Anaerolineales;f__Anaerolineaceae;g__;s__	259	1291040	0	1.72	0	1.72	56.27	60	57.016
GCA_021162405.1_ASM2116240v1_genomic	50-90% completeness AND/OR 5-10% contamination	Genbank	d__Bacteria;p__Chloroflexota;c__Anaerolineae;o__Anaerolineales;f__Anaerolineaceae;g__;s__	108	1520510	2.25056	1.72	100	0	75.08	90	78.064
3300025678_37	50-90% completeness AND/OR 5-10% contamination	Nayfach et al.	d__Bacteria;p__Chloroflexota;c__Anaerolineae;o__Anaerolineales;f__Anaerolineaceae;g__49-20;s__	34	2.08505e+06	5.10683	0	0	0	96.55	100	97.24
3300025682_39	50-90% completeness AND/OR 5-10% contamination	Nayfach et al.	d__Bacteria;p__Chloroflexota;c__Anaerolineae;o__Anaerolineales;f__Anaerolineaceae;g__49-20;s__	49	2138020	5.70809	0	0	0	98.28	95	97.624
3300025762_67	50-90% completeness AND/OR 5-10% contamination	Nayfach et al.	d__Bacteria;p__Chloroflexota;c__Anaerolineae;o__Anaerolineales;f__Anaerolineaceae;g__49-20;s__	98	1088010	0	0	0	0	52.12	80	57.696
GCA_008635265.1_ASM863526v1_genomic	50-90% completeness AND/OR 5-10% contamination	Genbank	d__Bacteria;p__Chloroflexota;c__Anaerolineae;o__Anaerolineales;f__Anaerolineaceae;g__49-20;s__	623	2054880	2.91355	49.34	97.75	1.11015	70.69	15	59.552
GCA_014237535.1_ASM1423753v1_genomic	50-90% completeness AND/OR 5-10% contamination	Genbank	d__Bacteria;p__Chloroflexota;c__Anaerolineae;o__Anaerolineales;f__Anaerolineaceae;g__49-20;s__	570	1637530	1.42837	1.33	50	0.665	75.24	45	69.192
GCA_018434785.1_SL3_genomic	50-90% completeness AND/OR 5-10% contamination	Genbank	d__Bacteria;p__Chloroflexota;c__Anaerolineae;o__Anaerolineales;f__Anaerolineaceae;g__49-20;s__	865	1701660	1.30108	3.13	0	3.13	73.35	50	68.68
GCA_002417685.1_ASM241768v1_genomic	50-90% completeness AND/OR 5-10% contamination	Genbank	d__Bacteria;p__Chloroflexota;c__Anaerolineae;o__Anaerolineales;f__Anaerolineaceae;g__49-20;s__49-20 sp002417685	124	1691700	6.15062	0	0	0	89.66	85	88.728
GCA_002436085.1_ASM243608v1_genomic	50-90% completeness AND/OR 5-10% contamination	Genbank	d__Bacteria;p__Chloroflexota;c__Anaerolineae;o__Anaerolineales;f__Anaerolineaceae;g__49-20;s__49-20 sp002436085	35	2156680	5.59935	0	0	0	97.41	100	97.928
GCA_012798015.1_ASM1279801v1_genomic	50-90% completeness AND/OR 5-10% contamination	Genbank	d__Bacteria;p__Chloroflexota;c__Anaerolineae;o__Anaerolineales;f__Anaerolineaceae;g__49-20;s__49-20 sp002436085	197	1992200	5.49794	0	0	0	94.83	90	93.864
GCA_003445715.1_ASM344571v1_genomic	50-90% completeness AND/OR 5-10% contamination	Genbank	d__Bacteria;p__Chloroflexota;c__Anaerolineae;o__Anaerolineales;f__Anaerolineaceae;g__49-20;s__49-20 sp003445715	113	1672420	5.92375	0	0	0	91.38	95	92.104
2.02672e+06	50-90% completeness AND/OR 5-10% contamination	PATRIC	d__Bacteria;p__Chloroflexota;c__Anaerolineae;o__Anaerolineales;f__Anaerolineaceae;g__49-20;s__49-20 sp003499715	96	1816590	9.79748	0	0	0	93.1	95	93.48
GCA_003499715.1_ASM349971v1_genomic	50-90% completeness AND/OR 5-10% contamination	Genbank	d__Bacteria;p__Chloroflexota;c__Anaerolineae;o__Anaerolineales;f__Anaerolineaceae;g__49-20;s__49-20 sp003499715	159	1141640	3.90841	1.72	100	0	64.2	65	64.36
GCA_017993575.1_ASM1799357v1_genomic	50-90% completeness AND/OR 5-10% contamination	Genbank	d__Bacteria;p__Chloroflexota;c__Anaerolineae;o__Anaerolineales;f__Anaerolineaceae;g__49-20;s__49-20 sp012797215	104	1879780	0.154273	0	0	0	84.48	80	83.584
GCA_011176685.1_ASM1117668v1_genomic	50-90% completeness AND/OR 5-10% contamination	Genbank	d__Bacteria;p__Chloroflexota;c__Anaerolineae;o__Anaerolineales;f__Anaerolineaceae;g__A373;s__A373 sp011176685	66	2.0838e+06	2.13888	0	0	0	87.93	85	87.344
3300013123_12	50-90% completeness AND/OR 5-10% contamination	Nayfach et al.	d__Bacteria;p__Chloroflexota;c__Anaerolineae;o__Anaerolineales;f__Anaerolineaceae;g__Anaerolinea;s__	671	5343260	0.728394	1.72	0	1.72	81.5	85	82.2
GCA_011332145.1_ASM1133214v1_genomic	50-90% completeness AND/OR 5-10% contamination	Genbank	d__Bacteria;p__Chloroflexota;c__Anaerolineae;o__Anaerolineales;f__Anaerolineaceae;g__Anaerolinea;s__	788	3056000	1.02029	3.45	0	3.45	67.05	75	68.64
GCA_016213455.1_ASM1621345v1_genomic	50-90% completeness AND/OR 5-10% contamination	Genbank	d__Bacteria;p__Chloroflexota;c__Anaerolineae;o__Anaerolineales;f__Anaerolineaceae;g__Anaerolinea;s__	594	3027160	0.519299	0	0	0	57.52	50	56.016
1.87252e+06	50-90% completeness AND/OR 5-10% contamination	PATRIC	d__Bacteria;p__Chloroflexota;c__Anaerolineae;o__Anaerolineales;f__Anaerolineaceae;g__Bellilinea;s__	23	1786870	3.50277	0	0	0	62.07	65	62.656
3300025515_4	50-90% completeness AND/OR 5-10% contamination	Nayfach et al.	d__Bacteria;p__Chloroflexota;c__Anaerolineae;o__Anaerolineales;f__Anaerolineaceae;g__Bellilinea;s__	291	2649670	1.42886	1.72	100	0	84.33	90	85.464
3300026509_25	50-90% completeness AND/OR 5-10% contamination	Nayfach et al.	d__Bacteria;p__Chloroflexota;c__Anaerolineae;o__Anaerolineales;f__Anaerolineaceae;g__Bellilinea;s__	170	2086880	1.29332	0	0	0	74.14	65	72.312
GCA_011367785.1_ASM1136778v1_genomic	50-90% completeness AND/OR 5-10% contamination	Genbank	d__Bacteria;p__Chloroflexota;c__Anaerolineae;o__Anaerolineales;f__Anaerolineaceae;g__Bellilinea;s__	130	2898580	0.460225	1.72	0	1.72	78.53	90	80.824
3300021604_25	50-90% completeness AND/OR 5-10% contamination	Nayfach et al.	d__Bacteria;p__Chloroflexota;c__Anaerolineae;o__Anaerolineales;f__Anaerolineaceae;g__Bellilinea;s__Bellilinea caldifistulae	9	1596650	0	0	0	0	62.07	65	62.656
GCA_003448875.1_ASM344887v1_genomic	50-90% completeness AND/OR 5-10% contamination	Genbank	d__Bacteria;p__Chloroflexota;c__Anaerolineae;o__Anaerolineales;f__Anaerolineaceae;g__Bellilinea;s__Bellilinea sp003448875	325	2329620	0.227934	0.16	0	0.16	79.15	75	78.32
GCA_013824745.1_ASM1382474v1_genomic	50-90% completeness AND/OR 5-10% contamination	Genbank	d__Bacteria;p__Chloroflexota;c__Anaerolineae;o__Anaerolineales;f__Anaerolineaceae;g__Bellilinea;s__Bellilinea sp004347695	303	2033040	2.09538	0.16	0	0.16	82.1	70	79.68
3300000426_7	50-90% completeness AND/OR 5-10% contamination	Nayfach et al.	d__Bacteria;p__Chloroflexota;c__Anaerolineae;o__Anaerolineales;f__Anaerolineaceae;g__Brevefilum;s__	153	1124020	0.29181	0	0	0	63.79	40	59.032
3300005068_13	50-90% completeness AND/OR 5-10% contamination	Nayfach et al.	d__Bacteria;p__Chloroflexota;c__Anaerolineae;o__Anaerolineales;f__Anaerolineaceae;g__Brevefilum;s__	272	1631930	1.22064	0	0	0	51.66	55	52.328
3300025677_49	50-90% completeness AND/OR 5-10% contamination	Nayfach et al.	d__Bacteria;p__Chloroflexota;c__Anaerolineae;o__Anaerolineales;f__Anaerolineaceae;g__Brevefilum;s__	52	1774300	0	0	0	0	80.88	90	82.704
GCA_011620545.1_ASM1162054v1_genomic	50-90% completeness AND/OR 5-10% contamination	Genbank	d__Bacteria;p__Chloroflexota;c__Anaerolineae;o__Anaerolineales;f__Anaerolineaceae;g__Brevefilum;s__	252	1346380	0.49466	0	0	0	53.86	50	53.088
GCA_016841365.1_ASM1684136v1_genomic	50-90% completeness AND/OR 5-10% contamination	Genbank	d__Bacteria;p__Chloroflexota;c__Anaerolineae;o__Anaerolineales;f__Anaerolineaceae;g__Brevefilum;s__	19	2855450	8.39482	0	0	0	98.12	100	98.496
3300025629_58	50-90% completeness AND/OR 5-10% contamination	Nayfach et al.	d__Bacteria;p__Chloroflexota;c__Anaerolineae;o__Anaerolineales;f__Anaerolineaceae;g__Brevefilum;s__Brevefilum fermentans	149	1038510	0.968696	0	0	0	52.41	75	56.928
GCA_003445515.1_ASM344551v1_genomic	50-90% completeness AND/OR 5-10% contamination	Genbank	d__Bacteria;p__Chloroflexota;c__Anaerolineae;o__Anaerolineales;f__Anaerolineaceae;g__Brevefilum;s__Brevefilum sp001508595	168	1938880	2.17084	0	0	0	75.13	80	76.104
GCA_002403205.1_ASM240320v1_genomic	50-90% completeness AND/OR 5-10% contamination	Genbank	d__Bacteria;p__Chloroflexota;c__Anaerolineae;o__Anaerolineales;f__Anaerolineaceae;g__Brevefilum;s__Brevefilum sp002403205	36	1908380	0	0	0	0	73.2	65	71.56
GCA_002436005.1_ASM243600v1_genomic	50-90% completeness AND/OR 5-10% contamination	Genbank	d__Bacteria;p__Chloroflexota;c__Anaerolineae;o__Anaerolineales;f__Anaerolineaceae;g__Brevefilum;s__Brevefilum sp002436005	105	1834550	0	0	0	0	68.03	80	70.424
GCA_002452315.1_ASM245231v1_genomic	50-90% completeness AND/OR 5-10% contamination	Genbank	d__Bacteria;p__Chloroflexota;c__Anaerolineae;o__Anaerolineales;f__Anaerolineaceae;g__Brevefilum;s__Brevefilum sp002452315	204	1926900	1.18999	0.31	50	0.155	76.41	70	75.128
GCA_003542325.1_ASM354232v1_genomic	50-90% completeness AND/OR 5-10% contamination	Genbank	d__Bacteria;p__Chloroflexota;c__Anaerolineae;o__Anaerolineales;f__Anaerolineaceae;g__Brevefilum;s__Brevefilum sp003542325	257	1839830	1.93061	0	0	0	61.91	70	63.528
GCA_003567435.1_ASM356743v1_genomic	50-90% completeness AND/OR 5-10% contamination	Genbank	d__Bacteria;p__Chloroflexota;c__Anaerolineae;o__Anaerolineales;f__Anaerolineaceae;g__Brevefilum;s__Brevefilum sp003563055	192	2544520	1.9654	0	0	0	86.21	80	84.968
GCA_007119455.1_ASM711945v1_genomic	50-90% completeness AND/OR 5-10% contamination	Genbank	d__Bacteria;p__Chloroflexota;c__Anaerolineae;o__Anaerolineales;f__Anaerolineaceae;g__Brevefilum;s__Brevefilum sp007119455	261	1887260	1.55252	2.59	100	0	73.98	85	76.184
GCA_007126555.1_ASM712655v1_genomic	50-90% completeness AND/OR 5-10% contamination	Genbank	d__Bacteria;p__Chloroflexota;c__Anaerolineae;o__Anaerolineales;f__Anaerolineaceae;g__Brevefilum;s__Brevefilum sp007119455	378	2364830	0.984849	0	0	0	83.39	75	81.712
GCA_007135845.1_ASM713584v1_genomic	50-90% completeness AND/OR 5-10% contamination	Genbank	d__Bacteria;p__Chloroflexota;c__Anaerolineae;o__Anaerolineales;f__Anaerolineaceae;g__Brevefilum;s__Brevefilum sp007135845	290	1726720	2.06171	1.72	100	0	62.15	75	64.72
GCA_012522475.1_ASM1252247v1_genomic	50-90% completeness AND/OR 5-10% contamination	Genbank	d__Bacteria;p__Chloroflexota;c__Anaerolineae;o__Anaerolineales;f__Anaerolineaceae;g__Brevefilum;s__Brevefilum sp012522475	89	2255160	6.73832	0.16	100	0	98.12	95	97.496
GCA_001603795.1_ASM160379v1_genomic	50-90% completeness AND/OR 5-10% contamination	Genbank	d__Bacteria;p__Chloroflexota;c__Anaerolineae;o__Anaerolineales;f__Anaerolineaceae;g__Ch10;s__	554	2602780	0.734215	6.19	33.33	4.12687	74.22	55	70.376
GCA_013178295.1_ASM1317829v1_genomic	50-90% completeness AND/OR 5-10% contamination	Genbank	d__Bacteria;p__Chloroflexota;c__Anaerolineae;o__Anaerolineales;f__Anaerolineaceae;g__Ch10;s__Ch10 sp013178295	21	3953310	9.73387	0	0	0	98.28	95	97.624
2.0249e+06	50-90% completeness AND/OR 5-10% contamination	PATRIC	d__Bacteria;p__Chloroflexota;c__Anaerolineae;o__Anaerolineales;f__Anaerolineaceae;g__Ch132;s__	116	2953970	3.18453	0.86	100	0	84.48	75	82.584
GCA_012516155.1_ASM1251615v1_genomic	50-90% completeness AND/OR 5-10% contamination	Genbank	d__Bacteria;p__Chloroflexota;c__Anaerolineae;o__Anaerolineales;f__Anaerolineaceae;g__DSYU01;s__	120	5458340	1.47572	5.86	0	5.86	98.28	90	96.624
GCA_014860825.1_ASM1486082v1_genomic	50-90% completeness AND/OR 5-10% contamination	Genbank	d__Bacteria;p__Chloroflexota;c__Anaerolineae;o__Anaerolineales;f__Anaerolineaceae;g__DSYU01;s__	1783	4265320	0.0839327	0.57	100	0	78.84	50	73.072
GCA_011367365.1_ASM1136736v1_genomic	50-90% completeness AND/OR 5-10% contamination	Genbank	d__Bacteria;p__Chloroflexota;c__Anaerolineae;o__Anaerolineales;f__Anaerolineaceae;g__DSYU01;s__DSYU01 sp011367365	139	5765750	2.44652	6.9	0	6.9	98.28	90	96.624
3300025597_37	50-90% completeness AND/OR 5-10% contamination	Nayfach et al.	d__Bacteria;p__Chloroflexota;c__Anaerolineae;o__Anaerolineales;f__Anaerolineaceae;g__Flexilinea;s__	299	1579450	1.42771	1.88	50	0.94	65.66	70	66.528
GCA_017417055.1_ASM1741705v1_genomic	50-90% completeness AND/OR 5-10% contamination	Genbank	d__Bacteria;p__Chloroflexota;c__Anaerolineae;o__Anaerolineales;f__Anaerolineaceae;g__Flexilinea;s__	200	4408100	7.17815	2.19	0	2.19	93.18	90	92.544
GCA_017432685.1_ASM1743268v1_genomic	50-90% completeness AND/OR 5-10% contamination	Genbank	d__Bacteria;p__Chloroflexota;c__Anaerolineae;o__Anaerolineales;f__Anaerolineaceae;g__Flexilinea;s__	151	3971870	6.4909	5.17	0	5.17	84.33	90	85.464
GCA_017432945.1_ASM1743294v1_genomic	50-90% completeness AND/OR 5-10% contamination	Genbank	d__Bacteria;p__Chloroflexota;c__Anaerolineae;o__Anaerolineales;f__Anaerolineaceae;g__Flexilinea;s__	539	3834950	0	8.62	0	8.62	48.82	70	53.056
GCA_017432985.1_ASM1743298v1_genomic	50-90% completeness AND/OR 5-10% contamination	Genbank	d__Bacteria;p__Chloroflexota;c__Anaerolineae;o__Anaerolineales;f__Anaerolineaceae;g__Flexilinea;s__	141	3510880	2.21967	4.08	28.57	2.91434	82.6	85	83.08
GCA_017433515.1_ASM1743351v1_genomic	50-90% completeness AND/OR 5-10% contamination	Genbank	d__Bacteria;p__Chloroflexota;c__Anaerolineae;o__Anaerolineales;f__Anaerolineaceae;g__Flexilinea;s__	250	4731480	6.54425	9.15	35.71	5.88253	86.1	90	86.88
GCA_017542315.1_ASM1754231v1_genomic	50-90% completeness AND/OR 5-10% contamination	Genbank	d__Bacteria;p__Chloroflexota;c__Anaerolineae;o__Anaerolineales;f__Anaerolineaceae;g__Flexilinea;s__	565	2993060	0.586691	3.45	0	3.45	66.64	60	65.312
3300025691_13	50-90% completeness AND/OR 5-10% contamination	Nayfach et al.	d__Bacteria;p__Chloroflexota;c__Anaerolineae;o__Anaerolineales;f__Anaerolineaceae;g__Flexilinea;s__Flexilinea flocculi	383	3146320	3.61597	3.45	0	3.45	79.23	85	80.384
GCA_002305345.1_ASM230534v1_genomic	50-90% completeness AND/OR 5-10% contamination	Genbank	d__Bacteria;p__Chloroflexota;c__Anaerolineae;o__Anaerolineales;f__Anaerolineaceae;g__Flexilinea;s__Flexilinea flocculi	173	2786780	2.58865	1.72	0	1.72	89.66	90	89.728
GCA_012798375.1_ASM1279837v1_genomic	50-90% completeness AND/OR 5-10% contamination	Genbank	d__Bacteria;p__Chloroflexota;c__Anaerolineae;o__Anaerolineales;f__Anaerolineaceae;g__Flexilinea;s__Flexilinea flocculi	502	2690680	1.39481	6.03	40	3.618	93.1	50	84.48
GCA_002068845.1_ASM206884v1_genomic	50-90% completeness AND/OR 5-10% contamination	Genbank	d__Bacteria;p__Chloroflexota;c__Anaerolineae;o__Anaerolineales;f__Anaerolineaceae;g__Flexilinea;s__Flexilinea sp002329625	334	2152640	5.10908	3.76	0	3.76	89.73	90	89.784
GCA_002329625.1_ASM232962v1_genomic	50-90% completeness AND/OR 5-10% contamination	Genbank	d__Bacteria;p__Chloroflexota;c__Anaerolineae;o__Anaerolineales;f__Anaerolineaceae;g__Flexilinea;s__Flexilinea sp002329625	151	2003740	2.85217	1.72	0	1.72	84.32	75	82.456
GCA_018056295.1_ASM1805629v1_genomic	50-90% completeness AND/OR 5-10% contamination	Genbank	d__Bacteria;p__Chloroflexota;c__Anaerolineae;o__Anaerolineales;f__Anaerolineaceae;g__Flexilinea;s__Flexilinea sp002329625	308	2166570	3.17737	8.78	62.5	3.2925	69.04	80	71.232
GCA_002407845.1_ASM240784v1_genomic	50-90% completeness AND/OR 5-10% contamination	Genbank	d__Bacteria;p__Chloroflexota;c__Anaerolineae;o__Anaerolineales;f__Anaerolineaceae;g__Flexilinea;s__Flexilinea sp002407845	36	2604520	7.92277	1.72	0	1.72	87.62	70	84.096
166587	50-90% completeness AND/OR 5-10% contamination	PATRIC	d__Bacteria;p__Chloroflexota;c__Anaerolineae;o__Anaerolineales;f__Anaerolineaceae;g__Flexilinea;s__Flexilinea sp902774215	240	4783470	5.57231	5.17	5.56	4.88255	95.53	95	95.424
GCA_902791025.1_Rumen_uncultured_genome_RUG13631_genomic	50-90% completeness AND/OR 5-10% contamination	Genbank	d__Bacteria;p__Chloroflexota;c__Anaerolineae;o__Anaerolineales;f__Anaerolineaceae;g__Flexilinea;s__Flexilinea sp902791025	75	4221480	8.32409	2.66	0	2.66	99.84	100	99.872
GCA_902795255.1_Rumen_uncultured_genome_RUG14060_genomic	50-90% completeness AND/OR 5-10% contamination	Genbank	d__Bacteria;p__Chloroflexota;c__Anaerolineae;o__Anaerolineales;f__Anaerolineaceae;g__Flexilinea;s__Flexilinea sp902795255	343	3472330	1.50792	3.61	0	3.61	84.33	90	85.464
GCA_012797675.1_ASM1279767v1_genomic	50-90% completeness AND/OR 5-10% contamination	Genbank	d__Bacteria;p__Chloroflexota;c__Anaerolineae;o__Anaerolineales;f__Anaerolineaceae;g__JAAZNB01;s__	867	3313430	0.365482	3.4	88.89	0.37774	84.48	60	79.584
GCA_012798515.1_ASM1279851v1_genomic	50-90% completeness AND/OR 5-10% contamination	Genbank	d__Bacteria;p__Chloroflexota;c__Anaerolineae;o__Anaerolineales;f__Anaerolineaceae;g__JAAZNB01;s__JAAZNB01 sp012798515	768	4915820	0.568979	0.86	0	0.86	92.76	70	88.208
3300013137_83	50-90% completeness AND/OR 5-10% contamination	Nayfach et al.	d__Bacteria;p__Chloroflexota;c__Anaerolineae;o__Anaerolineales;f__Anaerolineaceae;g__Leptolinea;s__	73	1803590	1.54802	0	0	0	87.77	75	85.216
GCA_012515195.1_ASM1251519v1_genomic	50-90% completeness AND/OR 5-10% contamination	Genbank	d__Bacteria;p__Chloroflexota;c__Anaerolineae;o__Anaerolineales;f__Anaerolineaceae;g__Leptolinea;s__Leptolinea sp012515195	438	3328790	1.88056	1.72	0	1.72	91.38	65	86.104
GCA_012798615.1_ASM1279861v1_genomic	50-90% completeness AND/OR 5-10% contamination	Genbank	d__Bacteria;p__Chloroflexota;c__Anaerolineae;o__Anaerolineales;f__Anaerolineaceae;g__Leptolinea;s__Leptolinea sp012798615	682	3004830	1.21305	4.31	0	4.31	80.85	65	77.68
3300025678_39	50-90% completeness AND/OR 5-10% contamination	Nayfach et al.	d__Bacteria;p__Chloroflexota;c__Anaerolineae;o__Anaerolineales;f__Anaerolineaceae;g__Longilinea;s__	44	2004760	0	0.94	83.33	0.156698	84.48	70	81.584
3300025740_21	50-90% completeness AND/OR 5-10% contamination	Nayfach et al.	d__Bacteria;p__Chloroflexota;c__Anaerolineae;o__Anaerolineales;f__Anaerolineaceae;g__Longilinea;s__	105	2969430	3.85697	1.72	0	1.72	85.42	90	86.336
3300029252_21	50-90% completeness AND/OR 5-10% contamination	Nayfach et al.	d__Bacteria;p__Chloroflexota;c__Anaerolineae;o__Anaerolineales;f__Anaerolineaceae;g__Longilinea;s__	290	1672460	0.197912	3.61	33.33	2.40679	60.11	65	61.088
GCA_012797225.1_ASM1279722v1_genomic	50-90% completeness AND/OR 5-10% contamination	Genbank	d__Bacteria;p__Chloroflexota;c__Anaerolineae;o__Anaerolineales;f__Anaerolineaceae;g__Longilinea;s__	662	2110490	0.121299	0	0	0	73.35	50	68.68
GCA_012798465.1_ASM1279846v1_genomic	50-90% completeness AND/OR 5-10% contamination	Genbank	d__Bacteria;p__Chloroflexota;c__Anaerolineae;o__Anaerolineales;f__Anaerolineaceae;g__Longilinea;s__	109	2758090	1.95606	0	0	0	80.49	75	79.392
GCA_017995855.1_ASM1799585v1_genomic	50-90% completeness AND/OR 5-10% contamination	Genbank	d__Bacteria;p__Chloroflexota;c__Anaerolineae;o__Anaerolineales;f__Anaerolineaceae;g__Longilinea;s__	214	1396100	1.38887	0	0	0	52.59	55	53.072
GCA_018000745.1_ASM1800074v1_genomic	50-90% completeness AND/OR 5-10% contamination	Genbank	d__Bacteria;p__Chloroflexota;c__Anaerolineae;o__Anaerolineales;f__Anaerolineaceae;g__Longilinea;s__	68	1316940	1.45033	0	0	0	50	65	53
GCA_019136175.1_ASM1913617v1_genomic	50-90% completeness AND/OR 5-10% contamination	Genbank	d__Bacteria;p__Chloroflexota;c__Anaerolineae;o__Anaerolineales;f__Anaerolineaceae;g__Longilinea;s__	485	2597800	1.66295	1.72	100	0	91.22	85	89.976
GCA_002412595.1_ASM241259v1_genomic	50-90% completeness AND/OR 5-10% contamination	Genbank	d__Bacteria;p__Chloroflexota;c__Anaerolineae;o__Anaerolineales;f__Anaerolineaceae;g__Pelolinea;s__Pelolinea sp002412595	65	2702870	0.889055	0	0	0	80.09	90	82.072
GCA_013824865.1_ASM1382486v1_genomic	50-90% completeness AND/OR 5-10% contamination	Genbank	d__Bacteria;p__Chloroflexota;c__Anaerolineae;o__Anaerolineales;f__Anaerolineaceae;g__PNON01;s__PNON01 sp013824865	57	2104110	4.74167	0	0	0	89.66	75	86.728
GCA_903828565.1_freshwater_MAG_---_LaPlata_bin-0305_genomic	50-90% completeness AND/OR 5-10% contamination	Genbank	d__Bacteria;p__Chloroflexota;c__Anaerolineae;o__Anaerolineales;f__Anaerolineaceae;g__PNON01;s__PNON01 sp903828565	48	2224950	5.03427	0	0	0	96.39	90	95.112
GCA_903906345.1_freshwater_MAG_---_LaPlata-b_bin-0661_genomic	50-90% completeness AND/OR 5-10% contamination	Genbank	d__Bacteria;p__Chloroflexota;c__Anaerolineae;o__Anaerolineales;f__Anaerolineaceae;g__PNON01;s__PNON01 sp903828565	487	1771990	2.20374	1.02	0	1.02	71.14	55	67.912
GCA_021162105.1_ASM2116210v1_genomic	50-90% completeness AND/OR 5-10% contamination	Genbank	d__Bacteria;p__Chloroflexota;c__Anaerolineae;o__Anaerolineales;f__Anaerolineaceae;g__SpSt-1165;s__	170	2189850	0	0	0	0	69.91	85	72.928
GCA_011053085.1_ASM1105308v1_genomic	50-90% completeness AND/OR 5-10% contamination	Genbank	d__Bacteria;p__Chloroflexota;c__Anaerolineae;o__Anaerolineales;f__Anaerolineaceae;g__SpSt-1165;s__SpSt-1165 sp011053085	421	2042160	1.60369	0.16	100	0	63.53	95	69.824
GCA_013314735.1_ASM1331473v1_genomic	50-90% completeness AND/OR 5-10% contamination	Genbank	d__Bacteria;p__Chloroflexota;c__Anaerolineae;o__Anaerolineales;f__Anaerolineaceae;g__SpSt-1165;s__SpSt-1165 sp013314735	13	4085580	6.48696	0	0	0	96.55	100	97.24
3300002977_18	50-90% completeness AND/OR 5-10% contamination	Nayfach et al.	d__Bacteria;p__Chloroflexota;c__Anaerolineae;o__Anaerolineales;f__Anaerolineaceae;g__T78;s__	173	1181190	0	0	0	0	68.81	75	70.048
3300013290_7	50-90% completeness AND/OR 5-10% contamination	Nayfach et al.	d__Bacteria;p__Chloroflexota;c__Anaerolineae;o__Anaerolineales;f__Anaerolineaceae;g__T78;s__	244	2403630	4.4283	0	0	0	86.21	90	86.968
3300025702_21	50-90% completeness AND/OR 5-10% contamination	Nayfach et al.	d__Bacteria;p__Chloroflexota;c__Anaerolineae;o__Anaerolineales;f__Anaerolineaceae;g__T78;s__	197	2577580	6.93208	0	0	0	87.93	90	88.344
3300025739_29	50-90% completeness AND/OR 5-10% contamination	Nayfach et al.	d__Bacteria;p__Chloroflexota;c__Anaerolineae;o__Anaerolineales;f__Anaerolineaceae;g__T78;s__	174	954570	2.1088	0.16	100	0	57.84	55	57.272
3300026290_59	50-90% completeness AND/OR 5-10% contamination	Nayfach et al.	d__Bacteria;p__Chloroflexota;c__Anaerolineae;o__Anaerolineales;f__Anaerolineaceae;g__T78;s__	158	1602280	0	0	0	0	75.78	80	76.624
3300026290_68	50-90% completeness AND/OR 5-10% contamination	Nayfach et al.	d__Bacteria;p__Chloroflexota;c__Anaerolineae;o__Anaerolineales;f__Anaerolineaceae;g__T78;s__	128	1494650	1.69806	0.16	100	0	77.59	75	77.072
3300028567_66	50-90% completeness AND/OR 5-10% contamination	Nayfach et al.	d__Bacteria;p__Chloroflexota;c__Anaerolineae;o__Anaerolineales;f__Anaerolineaceae;g__T78;s__	3	1245820	0	0	0	0	55.96	70	58.768
GCA_012512535.1_ASM1251253v1_genomic	50-90% completeness AND/OR 5-10% contamination	Genbank	d__Bacteria;p__Chloroflexota;c__Anaerolineae;o__Anaerolineales;f__Anaerolineaceae;g__T78;s__	464	1529130	0	1.88	50	0.94	80.72	40	72.576
GCA_012514725.1_ASM1251472v1_genomic	50-90% completeness AND/OR 5-10% contamination	Genbank	d__Bacteria;p__Chloroflexota;c__Anaerolineae;o__Anaerolineales;f__Anaerolineaceae;g__T78;s__	494	1594170	2.38557	7.05	83.33	1.17524	86.21	60	80.968
GCA_012515815.1_ASM1251581v1_genomic	50-90% completeness AND/OR 5-10% contamination	Genbank	d__Bacteria;p__Chloroflexota;c__Anaerolineae;o__Anaerolineales;f__Anaerolineaceae;g__T78;s__	357	1472010	2.33626	1.72	0	1.72	82.45	55	76.96
GCA_012841075.1_ASM1284107v1_genomic	50-90% completeness AND/OR 5-10% contamination	Genbank	d__Bacteria;p__Chloroflexota;c__Anaerolineae;o__Anaerolineales;f__Anaerolineaceae;g__T78;s__	256	2014410	6.45598	2.04	66.67	0.679932	89.5	95	90.6
GCA_014155645.1_ASM1415564v1_genomic	50-90% completeness AND/OR 5-10% contamination	Genbank	d__Bacteria;p__Chloroflexota;c__Anaerolineae;o__Anaerolineales;f__Anaerolineaceae;g__T78;s__	305	1725260	0.886243	1.72	0	1.72	49.06	70	53.248
GCA_017995665.1_ASM1799566v1_genomic	50-90% completeness AND/OR 5-10% contamination	Genbank	d__Bacteria;p__Chloroflexota;c__Anaerolineae;o__Anaerolineales;f__Anaerolineaceae;g__T78;s__	201	1502930	2.13982	1.72	100	0	70.69	85	73.552
GCA_019136215.1_ASM1913621v1_genomic	50-90% completeness AND/OR 5-10% contamination	Genbank	d__Bacteria;p__Chloroflexota;c__Anaerolineae;o__Anaerolineales;f__Anaerolineaceae;g__T78;s__	222	1858270	3.61358	0	0	0	90.6	85	89.48
GCA_001603765.1_ASM160376v1_genomic	50-90% completeness AND/OR 5-10% contamination	Genbank	d__Bacteria;p__Chloroflexota;c__Anaerolineae;o__Anaerolineales;f__Anaerolineaceae;g__T78;s__T78 sp001603765	324	1825740	1.71054	0.16	0	0.16	86.05	70	82.84
GCA_002305635.1_ASM230563v1_genomic	50-90% completeness AND/OR 5-10% contamination	Genbank	d__Bacteria;p__Chloroflexota;c__Anaerolineae;o__Anaerolineales;f__Anaerolineaceae;g__T78;s__T78 sp002305635	31	1651870	0.25002	0	0	0	83.7	70	80.96
3300029822_19	50-90% completeness AND/OR 5-10% contamination	Nayfach et al.	d__Bacteria;p__Chloroflexota;c__Anaerolineae;o__Anaerolineales;f__Anaerolineaceae;g__T78;s__T78 sp002407905	53	2383510	8.52314	0	0	0	98.28	95	97.624
GCA_002410005.1_ASM241000v1_genomic	50-90% completeness AND/OR 5-10% contamination	Genbank	d__Bacteria;p__Chloroflexota;c__Anaerolineae;o__Anaerolineales;f__Anaerolineaceae;g__T78;s__T78 sp002409365	113	2307980	8.2609	3.45	0	3.45	81.71	75	80.368
GCA_002398025.1_ASM239802v1_genomic	50-90% completeness AND/OR 5-10% contamination	Genbank	d__Bacteria;p__Chloroflexota;c__Anaerolineae;o__Anaerolineales;f__Anaerolineaceae;g__T78;s__T78 sp002409625	83	1979570	7.06517	0	0	0	94.83	85	92.864
GCA_002409015.1_ASM240901v1_genomic	50-90% completeness AND/OR 5-10% contamination	Genbank	d__Bacteria;p__Chloroflexota;c__Anaerolineae;o__Anaerolineales;f__Anaerolineaceae;g__T78;s__T78 sp002409625	19	1746850	0	0	0	0	86.21	85	85.968
GCA_002409625.1_ASM240962v1_genomic	50-90% completeness AND/OR 5-10% contamination	Genbank	d__Bacteria;p__Chloroflexota;c__Anaerolineae;o__Anaerolineales;f__Anaerolineaceae;g__T78;s__T78 sp002409625	17	2110190	5.53599	0	0	0	98.28	100	98.624
GCA_012510905.1_ASM1251090v1_genomic	50-90% completeness AND/OR 5-10% contamination	Genbank	d__Bacteria;p__Chloroflexota;c__Anaerolineae;o__Anaerolineales;f__Anaerolineaceae;g__T78;s__T78 sp002409625	612	1988340	0.590945	8.93	11.76	7.87983	89.89	65	84.912
3300029775_14	50-90% completeness AND/OR 5-10% contamination	Nayfach et al.	d__Bacteria;p__Chloroflexota;c__Anaerolineae;o__Anaerolineales;f__Anaerolineaceae;g__T78;s__T78 sp002411175	99	2390200	7.19396	0	0	0	96.55	100	97.24
GCA_002423495.1_ASM242349v1_genomic	50-90% completeness AND/OR 5-10% contamination	Genbank	d__Bacteria;p__Chloroflexota;c__Anaerolineae;o__Anaerolineales;f__Anaerolineaceae;g__T78;s__T78 sp002423495	103	2336210	2.31058	1.72	100	0	88.56	75	85.848
GCA_002435825.1_ASM243582v1_genomic	50-90% completeness AND/OR 5-10% contamination	Genbank	d__Bacteria;p__Chloroflexota;c__Anaerolineae;o__Anaerolineales;f__Anaerolineaceae;g__T78;s__T78 sp002435825	76	2011600	1.43468	0	0	0	93.1	75	89.48
GCA_003532515.1_ASM353251v1_genomic	50-90% completeness AND/OR 5-10% contamination	Genbank	d__Bacteria;p__Chloroflexota;c__Anaerolineae;o__Anaerolineales;f__Anaerolineaceae;g__T78;s__T78 sp003532515	284	1982600	4.61364	0.16	100	0	80.88	60	76.704
GCA_011620445.1_ASM1162044v1_genomic	50-90% completeness AND/OR 5-10% contamination	Genbank	d__Bacteria;p__Chloroflexota;c__Anaerolineae;o__Anaerolineales;f__Anaerolineaceae;g__T78;s__T78 sp011620445	299	1918870	0	3.47	16.67	2.89155	90.91	70	86.728
GCA_011620465.1_ASM1162046v1_genomic	50-90% completeness AND/OR 5-10% contamination	Genbank	d__Bacteria;p__Chloroflexota;c__Anaerolineae;o__Anaerolineales;f__Anaerolineaceae;g__T78;s__T78 sp011620465	179	1879000	6.57105	0	0	0	91.22	75	87.976
GCA_011620505.1_ASM1162050v1_genomic	50-90% completeness AND/OR 5-10% contamination	Genbank	d__Bacteria;p__Chloroflexota;c__Anaerolineae;o__Anaerolineales;f__Anaerolineaceae;g__T78;s__T78 sp011620505	168	1775310	7.19931	0	0	0	93.1	60	86.48
GCA_012514645.1_ASM1251464v1_genomic	50-90% completeness AND/OR 5-10% contamination	Genbank	d__Bacteria;p__Chloroflexota;c__Anaerolineae;o__Anaerolineales;f__Anaerolineaceae;g__T78;s__T78 sp012514645	252	2026130	6.17335	2.76	50	1.38	89.32	80	87.456
GCA_012800995.1_ASM1280099v1_genomic	50-90% completeness AND/OR 5-10% contamination	Genbank	d__Bacteria;p__Chloroflexota;c__Anaerolineae;o__Anaerolineales;f__Anaerolineaceae;g__T78;s__T78 sp012800995	296	1377340	0	0.16	100	0	85.34	35	75.272
GCA_018432465.1_LM1_genomic	50-90% completeness AND/OR 5-10% contamination	Genbank	d__Bacteria;p__Chloroflexota;c__Anaerolineae;o__Anaerolineales;f__Anaerolineaceae;g__T78;s__T78 sp012839565	664	1294640	0	7.35	8.33	6.73774	71.47	40	65.176
GCA_018435285.1_SL1_genomic	50-90% completeness AND/OR 5-10% contamination	Genbank	d__Bacteria;p__Chloroflexota;c__Anaerolineae;o__Anaerolineales;f__Anaerolineaceae;g__T78;s__T78 sp012839565	660	1222120	0	5.99	20	4.792	65.2	40	60.16
GCA_018435755.1_R3_genomic	50-90% completeness AND/OR 5-10% contamination	Genbank	d__Bacteria;p__Chloroflexota;c__Anaerolineae;o__Anaerolineales;f__Anaerolineaceae;g__T78;s__T78 sp012839565	519	1143590	0	2.16	0	2.16	57.76	35	53.208
GCA_011328845.1_ASM1132884v1_genomic	50-90% completeness AND/OR 5-10% contamination	Genbank	d__Bacteria;p__Chloroflexota;c__Anaerolineae;o__Anaerolineales;f__Anaerolineaceae;g__UBA3924;s__	742	4160660	1.7329	5.17	0	5.17	74.89	85	76.912
GCA_002385985.1_ASM238598v1_genomic	50-90% completeness AND/OR 5-10% contamination	Genbank	d__Bacteria;p__Chloroflexota;c__Anaerolineae;o__Anaerolineales;f__Anaerolineaceae;g__UBA3924;s__UBA3924 sp002385985	49	2700650	3.79131	0	0	0	84.48	85	84.584
GCA_013335895.1_ASM1333589v1_genomic	50-90% completeness AND/OR 5-10% contamination	Genbank	d__Bacteria;p__Chloroflexota;c__Anaerolineae;o__Anaerolineales;f__Anaerolineaceae;g__UBA4081;s__	649	2013690	0.179273	0	0	0	56.69	55	56.352
GCA_903889865.1_freshwater_MAG_---_AlinenSedimentsCore1_bin-0393_genomic	50-90% completeness AND/OR 5-10% contamination	Genbank	d__Bacteria;p__Chloroflexota;c__Anaerolineae;o__Anaerolineales;f__Anaerolineaceae;g__UBA4081;s__	728	2163910	0.748645	3.45	0	3.45	71.79	35	64.432
GCA_002383615.1_ASM238361v1_genomic	50-90% completeness AND/OR 5-10% contamination	Genbank	d__Bacteria;p__Chloroflexota;c__Anaerolineae;o__Anaerolineales;f__Anaerolineaceae;g__UBA4081;s__UBA4081 sp002383615	183	1678380	1.09153	0	0	0	80.17	75	79.136
GCA_003599805.1_ASM359980v1_genomic	50-90% completeness AND/OR 5-10% contamination	Genbank	d__Bacteria;p__Chloroflexota;c__Anaerolineae;o__Anaerolineales;f__Anaerolineaceae;g__UBA4781;s__	84	2259350	3.57094	0	0	0	86.21	80	84.968
GCA_002403105.1_ASM240310v1_genomic	50-90% completeness AND/OR 5-10% contamination	Genbank	d__Bacteria;p__Chloroflexota;c__Anaerolineae;o__Anaerolineales;f__Anaerolineaceae;g__UBA4781;s__UBA4781 sp002403105	111	1916760	0	0	0	0	79.15	75	78.32
GCA_003446605.1_ASM344660v1_genomic	50-90% completeness AND/OR 5-10% contamination	Genbank	d__Bacteria;p__Chloroflexota;c__Anaerolineae;o__Anaerolineales;f__Anaerolineaceae;g__UBA4781;s__UBA4781 sp003446605	213	2659330	3.29557	0	0	0	86.21	90	86.968
GCA_018434825.1_SL3_genomic	50-90% completeness AND/OR 5-10% contamination	Genbank	d__Bacteria;p__Chloroflexota;c__Anaerolineae;o__Anaerolineales;f__Anaerolineaceae;g__UBA4781;s__UBA4781 sp012798455	1037	1743670	0.996748	5.8	11.11	5.15562	60.97	65	61.776
GCA_002403095.1_ASM240309v1_genomic	50-90% completeness AND/OR 5-10% contamination	Genbank	d__Bacteria;p__Chloroflexota;c__Anaerolineae;o__Anaerolineales;f__Anaerolineaceae;g__UBA4782;s__UBA4782 sp002403095	55	2255590	4.79786	0	0	0	86.21	80	84.968
GCA_018055445.1_ASM1805544v1_genomic	50-90% completeness AND/OR 5-10% contamination	Genbank	d__Bacteria;p__Chloroflexota;c__Anaerolineae;o__Anaerolineales;f__Anaerolineaceae;g__UBA4782;s__UBA4782 sp002403095	298	1966670	0.486101	0.34	100	0	70.92	70	70.736
2.0249e+06	50-90% completeness AND/OR 5-10% contamination	PATRIC	d__Bacteria;p__Chloroflexota;c__Anaerolineae;o__Anaerolineales;f__Anaerolineaceae;g__UBA5203;s__	346	5600800	2.26218	5.17	0	5.17	89.66	100	91.728
GCA_021107195.1_ASM2110719v1_genomic	50-90% completeness AND/OR 5-10% contamination	Genbank	d__Bacteria;p__Chloroflexota;c__Anaerolineae;o__Anaerolineales;f__Anaerolineaceae;g__UBA5203;s__	442	3558610	1.84004	1.21	0	1.21	89.5	90	89.6
2.07312e+06	50-90% completeness AND/OR 5-10% contamination	PATRIC	d__Bacteria;p__Chloroflexota;c__Anaerolineae;o__Anaerolineales;f__Anaerolineaceae;g__UBA6107;s__	33	3093100	1.77298	0.86	0	0.86	84.48	90	85.584
3300012886_44	50-90% completeness AND/OR 5-10% contamination	Nayfach et al.	d__Bacteria;p__Chloroflexota;c__Anaerolineae;o__Anaerolineales;f__Anaerolineaceae;g__UBA6107;s__	28	1720610	0	0	0	0	55.96	75	59.768
3300025682_56	50-90% completeness AND/OR 5-10% contamination	Nayfach et al.	d__Bacteria;p__Chloroflexota;c__Anaerolineae;o__Anaerolineales;f__Anaerolineaceae;g__UBA6107;s__	38	1609690	2.95833	0	0	0	86.21	90	86.968
3300025691_32	50-90% completeness AND/OR 5-10% contamination	Nayfach et al.	d__Bacteria;p__Chloroflexota;c__Anaerolineae;o__Anaerolineales;f__Anaerolineaceae;g__UBA6107;s__	29	2043370	0	0	0	0	86.21	90	86.968
GCA_013791645.1_ASM1379164v1_genomic	50-90% completeness AND/OR 5-10% contamination	Genbank	d__Bacteria;p__Chloroflexota;c__Anaerolineae;o__Anaerolineales;f__Anaerolineaceae;g__UBA6107;s__	794	3943830	0.544648	2.9	0	2.9	90.91	65	85.728
GCA_014155725.1_ASM1415572v1_genomic	50-90% completeness AND/OR 5-10% contamination	Genbank	d__Bacteria;p__Chloroflexota;c__Anaerolineae;o__Anaerolineales;f__Anaerolineaceae;g__UBA6107;s__	365	1964200	6.78241	3.45	0	3.45	51.78	75	56.424
GCA_018056725.1_ASM1805672v1_genomic	50-90% completeness AND/OR 5-10% contamination	Genbank	d__Bacteria;p__Chloroflexota;c__Anaerolineae;o__Anaerolineales;f__Anaerolineaceae;g__UBA6107;s__	90	2137960	0.485042	0	0	0	91.85	80	89.48
GCA_002347485.1_ASM234748v1_genomic	50-90% completeness AND/OR 5-10% contamination	Genbank	d__Bacteria;p__Chloroflexota;c__Anaerolineae;o__Anaerolineales;f__Anaerolineaceae;g__UBA6107;s__UBA6107 sp002347485	66	2043170	0.344563	0	0	0	76.96	85	78.568
GCA_002402725.1_ASM240272v1_genomic	50-90% completeness AND/OR 5-10% contamination	Genbank	d__Bacteria;p__Chloroflexota;c__Anaerolineae;o__Anaerolineales;f__Anaerolineaceae;g__UBA6107;s__UBA6107 sp002402725	48	1344620	3.87173	0	0	0	63.48	50	60.784
GCA_002840715.1_ASM284071v1_genomic	50-90% completeness AND/OR 5-10% contamination	Genbank	d__Bacteria;p__Chloroflexota;c__Anaerolineae;o__Anaerolineales;f__Anaerolineaceae;g__UBA6107;s__UBA6107 sp002840715	50	3858080	2.74178	0.86	0	0.86	79.62	85	80.696
GCA_003501835.1_ASM350183v1_genomic	50-90% completeness AND/OR 5-10% contamination	Genbank	d__Bacteria;p__Chloroflexota;c__Anaerolineae;o__Anaerolineales;f__Anaerolineaceae;g__UBA6107;s__UBA6107 sp003501835	240	1777940	1.21433	4.23	5.88	3.98128	79.08	60	75.264
GCA_003524305.1_ASM352430v1_genomic	50-90% completeness AND/OR 5-10% contamination	Genbank	d__Bacteria;p__Chloroflexota;c__Anaerolineae;o__Anaerolineales;f__Anaerolineaceae;g__UBA6107;s__UBA6107 sp003524305	49	3576840	0	1.02	0	1.02	91.38	80	89.104
GCA_001603775.1_ASM160377v1_genomic	50-90% completeness AND/OR 5-10% contamination	Genbank	d__Bacteria;p__Chloroflexota;c__Anaerolineae;o__Anaerolineales;f__Anaerolineaceae;g__UBA6107;s__UBA6107 sp012797695	240	1817340	1.33767	1.72	0	1.72	75.86	50	70.688
GCA_017994325.1_ASM1799432v1_genomic	50-90% completeness AND/OR 5-10% contamination	Genbank	d__Bacteria;p__Chloroflexota;c__Anaerolineae;o__Anaerolineales;f__Anaerolineaceae;g__UBA6107;s__UBA6107 sp012798065	140	1205550	1.64738	0	0	0	70.69	60	68.552
GCA_013824385.1_ASM1382438v1_genomic	50-90% completeness AND/OR 5-10% contamination	Genbank	d__Bacteria;p__Chloroflexota;c__Anaerolineae;o__Anaerolineales;f__Anaerolineaceae;g__UBA6107;s__UBA6107 sp013824385	470	3257400	1.86744	0.86	0	0.86	76.02	70	74.816
2.07312e+06	50-90% completeness AND/OR 5-10% contamination	PATRIC	d__Bacteria;p__Chloroflexota;c__Anaerolineae;o__Anaerolineales;f__Anaerolineaceae;g__UBA6170;s__	383	2113970	2.46881	1.44	100	0	52.88	70	56.304
3300021604_28	50-90% completeness AND/OR 5-10% contamination	Nayfach et al.	d__Bacteria;p__Chloroflexota;c__Anaerolineae;o__Anaerolineales;f__Anaerolineaceae;g__UBA6170;s__	11	1214890	0	0	0	0	59.4	65	60.52
GCA_003251255.1_ASM325125v1_genomic	50-90% completeness AND/OR 5-10% contamination	Genbank	d__Bacteria;p__Chloroflexota;c__Anaerolineae;o__Anaerolineales;f__Anaerolineaceae;g__UBA6170;s__	350	2439910	0.337308	0	0	0	50.94	70	54.752
GCA_003251835.1_ASM325183v1_genomic	50-90% completeness AND/OR 5-10% contamination	Genbank	d__Bacteria;p__Chloroflexota;c__Anaerolineae;o__Anaerolineales;f__Anaerolineaceae;g__UBA6170;s__	592	4227020	0.969241	0	0	0	65.6	80	68.48
GCA_013334685.1_ASM1333468v1_genomic	50-90% completeness AND/OR 5-10% contamination	Genbank	d__Bacteria;p__Chloroflexota;c__Anaerolineae;o__Anaerolineales;f__Anaerolineaceae;g__UBA6170;s__	901	2342520	0.547274	7.68	10	6.912	61.13	40	56.904
GCA_014860845.1_ASM1486084v1_genomic	50-90% completeness AND/OR 5-10% contamination	Genbank	d__Bacteria;p__Chloroflexota;c__Anaerolineae;o__Anaerolineales;f__Anaerolineaceae;g__UBA6170;s__	840	4107330	2.40083	2.19	100	0	89.66	85	88.728
2.07312e+06	50-90% completeness AND/OR 5-10% contamination	PATRIC	d__Bacteria;p__Chloroflexota;c__Anaerolineae;o__Anaerolineales;f__Anaerolineaceae;g__UBA6170;s__UBA6170 sp002840735	257	1565350	2.28064	0	0	0	50	50	50
GCA_002422245.1_ASM242224v1_genomic	50-90% completeness AND/OR 5-10% contamination	Genbank	d__Bacteria;p__Chloroflexota;c__Anaerolineae;o__Anaerolineales;f__Anaerolineaceae;g__UBA6170;s__UBA6170 sp002840735	188	2090920	2.9762	0	0	0	79.78	75	78.824
3300018018_16	50-90% completeness AND/OR 5-10% contamination	Nayfach et al.	d__Bacteria;p__Chloroflexota;c__Anaerolineae;o__Anaerolineales;f__Anaerolineaceae;g__UBA700;s__	416	2951710	0.126367	0.16	0	0.16	74.14	80	75.312
GCA_002298885.1_ASM229888v1_genomic	50-90% completeness AND/OR 5-10% contamination	Genbank	d__Bacteria;p__Chloroflexota;c__Anaerolineae;o__Anaerolineales;f__Anaerolineaceae;g__UBA700;s__UBA700 sp002298885	366	3832750	1.22106	0	0	0	86.21	85	85.968
167964	50-90% completeness AND/OR 5-10% contamination	PATRIC	d__Bacteria;p__Chloroflexota;c__Anaerolineae;o__Anaerolineales;f__DRKV01;g__DRKV01;s__	279	1785850	0	0	0	0	62.07	90	67.656
GCA_003695165.1_ASM369516v1_genomic	50-90% completeness AND/OR 5-10% contamination	Genbank	d__Bacteria;p__Chloroflexota;c__Anaerolineae;o__Anaerolineales;f__DRKV01;g__DRKV01;s__	1014	2809810	0.90967	3.45	50	1.725	89.66	85	88.728
GCA_011051635.1_ASM1105163v1_genomic	50-90% completeness AND/OR 5-10% contamination	Genbank	d__Bacteria;p__Chloroflexota;c__Anaerolineae;o__Anaerolineales;f__DRKV01;g__DRKV01;s__DRKV01 sp011051635	482	2701710	1.22219	0.86	0	0.86	84.48	85	84.584
GCA_015484985.1_ASM1548498v1_genomic	50-90% completeness AND/OR 5-10% contamination	Genbank	d__Bacteria;p__Chloroflexota;c__Anaerolineae;o__Anaerolineales;f__DRMV01;g__;s__	289	2036800	0	3.76	100	0	81.27	80	81.016
GCA_015488085.1_ASM1548808v1_genomic	50-90% completeness AND/OR 5-10% contamination	Genbank	d__Bacteria;p__Chloroflexota;c__Anaerolineae;o__Anaerolineales;f__DRMV01;g__;s__	521	2110790	0	9.8	60.87	3.83474	80.88	75	79.704
GCA_015491595.1_ASM1549159v1_genomic	50-90% completeness AND/OR 5-10% contamination	Genbank	d__Bacteria;p__Chloroflexota;c__Anaerolineae;o__Anaerolineales;f__DRMV01;g__;s__	450	2.08145e+06	0	1.72	100	0	81.74	60	77.392
GCA_015494635.1_ASM1549463v1_genomic	50-90% completeness AND/OR 5-10% contamination	Genbank	d__Bacteria;p__Chloroflexota;c__Anaerolineae;o__Anaerolineales;f__DRMV01;g__;s__	329	1640060	0.648147	2.59	100	0	64.5	80	67.6
GCA_015494875.1_ASM1549487v1_genomic	50-90% completeness AND/OR 5-10% contamination	Genbank	d__Bacteria;p__Chloroflexota;c__Anaerolineae;o__Anaerolineales;f__DRMV01;g__DRMV01;s__DRMV01 sp011322445	369	2044990	0.633744	0.34	100	0	86.91	65	82.528
GCA_013154225.1_ASM1315422v1_genomic	50-90% completeness AND/OR 5-10% contamination	Genbank	d__Bacteria;p__Chloroflexota;c__Anaerolineae;o__Anaerolineales;f__DRMV01;g__DRMV01;s__DRMV01 sp013154225	237	1860260	2.86412	1.72	0	1.72	82.41	70	79.928
GCA_015494815.1_ASM1549481v1_genomic	50-90% completeness AND/OR 5-10% contamination	Genbank	d__Bacteria;p__Chloroflexota;c__Anaerolineae;o__Anaerolineales;f__DRMV01;g__JAADEN01;s__	298	2039070	0	1.72	100	0	89.66	90	89.728
GCA_013153135.1_ASM1315313v1_genomic	50-90% completeness AND/OR 5-10% contamination	Genbank	d__Bacteria;p__Chloroflexota;c__Anaerolineae;o__Anaerolineales;f__DRMV01;g__JAADEN01;s__JAADEN01 sp013153135	161	1765810	0	0	0	0	74.61	85	76.688
GCA_013153335.1_ASM1315333v1_genomic	50-90% completeness AND/OR 5-10% contamination	Genbank	d__Bacteria;p__Chloroflexota;c__Anaerolineae;o__Anaerolineales;f__DRMV01;g__JAADEN01;s__JAADEN01 sp013153335	221	1582610	0	0	0	0	77.19	55	72.752
GCA_013153375.1_ASM1315337v1_genomic	50-90% completeness AND/OR 5-10% contamination	Genbank	d__Bacteria;p__Chloroflexota;c__Anaerolineae;o__Anaerolineales;f__DRMV01;g__JAADEN01;s__JAADEN01 sp013153375	240	1717730	0	0	0	0	91.38	70	87.104
GCA_001795065.1_ASM179506v1_genomic	50-90% completeness AND/OR 5-10% contamination	Genbank	d__Bacteria;p__Chloroflexota;c__Anaerolineae;o__Anaerolineales;f__E44-bin32;g__;s__	261	2960890	2.21217	0	0	0	66.07	70	66.856
GCA_001795115.1_ASM179511v1_genomic	50-90% completeness AND/OR 5-10% contamination	Genbank	d__Bacteria;p__Chloroflexota;c__Anaerolineae;o__Anaerolineales;f__E44-bin32;g__;s__	228	3981640	0	0	0	0	85.34	75	83.272
GCA_001796715.1_ASM179671v1_genomic	50-90% completeness AND/OR 5-10% contamination	Genbank	d__Bacteria;p__Chloroflexota;c__Anaerolineae;o__Anaerolineales;f__E44-bin32;g__;s__	238	3743720	4.70548	8.62	0	8.62	87.15	70	83.72
GCA_001797105.1_ASM179710v1_genomic	50-90% completeness AND/OR 5-10% contamination	Genbank	d__Bacteria;p__Chloroflexota;c__Anaerolineae;o__Anaerolineales;f__E44-bin32;g__;s__	144	4012720	0.134074	0	0	0	82.29	90	83.832
GCA_004356475.1_ASM435647v1_genomic	50-90% completeness AND/OR 5-10% contamination	Genbank	d__Bacteria;p__Chloroflexota;c__Anaerolineae;o__Anaerolineales;f__E44-bin32;g__;s__	173	1397830	0	0	0	0	48.75	55	50
GCA_004377125.1_ASM437712v1_genomic	50-90% completeness AND/OR 5-10% contamination	Genbank	d__Bacteria;p__Chloroflexota;c__Anaerolineae;o__Anaerolineales;f__E44-bin32;g__;s__	518	2446320	1.68416	2.04	0	2.04	77.74	70	76.192
GCA_011374325.1_ASM1137432v1_genomic	50-90% completeness AND/OR 5-10% contamination	Genbank	d__Bacteria;p__Chloroflexota;c__Anaerolineae;o__Anaerolineales;f__E44-bin32;g__;s__	670	2376990	1.86412	0.16	0	0.16	80.8	70	78.64
GCA_011772455.1_ASM1177245v1_genomic	50-90% completeness AND/OR 5-10% contamination	Genbank	d__Bacteria;p__Chloroflexota;c__Anaerolineae;o__Anaerolineales;f__E44-bin32;g__;s__	152	5236010	3.70626	0	0	0	89.5	75	86.6
GCA_015484995.1_ASM1548499v1_genomic	50-90% completeness AND/OR 5-10% contamination	Genbank	d__Bacteria;p__Chloroflexota;c__Anaerolineae;o__Anaerolineales;f__E44-bin32;g__;s__	587	2214180	0	1.72	0	1.72	57.84	60	58.272
GCA_016866015.1_JGI_2017-08-21_genomic	50-90% completeness AND/OR 5-10% contamination	Genbank	d__Bacteria;p__Chloroflexota;c__Anaerolineae;o__Anaerolineales;f__E44-bin32;g__;s__	737	2856360	1.30026	0	0	0	79.62	85	80.696
GCA_017885695.1_ASM1788569v1_genomic	50-90% completeness AND/OR 5-10% contamination	Genbank	d__Bacteria;p__Chloroflexota;c__Anaerolineae;o__Anaerolineales;f__E44-bin32;g__;s__	752	4031180	0	26.54	78.26	5.7698	85.94	80	84.752
GCA_015660765.1_ASM1566076v1_genomic	50-90% completeness AND/OR 5-10% contamination	Genbank	d__Bacteria;p__Chloroflexota;c__Anaerolineae;o__Anaerolineales;f__E44-bin32;g__DSPQ01;s__	458	2428530	0.884897	1.18	66.67	0.393294	71.08	80	72.864
GCA_016844325.1_ASM1684432v1_genomic	50-90% completeness AND/OR 5-10% contamination	Genbank	d__Bacteria;p__Chloroflexota;c__Anaerolineae;o__Anaerolineales;f__E44-bin32;g__DSPQ01;s__	550	2344940	0	4.31	66.67	1.43652	59.72	80	63.776
GCA_020350285.1_ASM2035028v1_genomic	50-90% completeness AND/OR 5-10% contamination	Genbank	d__Bacteria;p__Chloroflexota;c__Anaerolineae;o__Anaerolineales;f__E44-bin32;g__DUEZ01;s__	1	3405360	0	0	0	0	86.05	75	83.84
GCA_011174845.1_ASM1117484v1_genomic	50-90% completeness AND/OR 5-10% contamination	Genbank	d__Bacteria;p__Chloroflexota;c__Anaerolineae;o__Anaerolineales;f__E44-bin32;g__DUEZ01;s__DUEZ01 sp011174845	233	3130270	0	1.72	0	1.72	90.52	85	89.416
GCA_003229625.1_ASM322962v1_genomic	50-90% completeness AND/OR 5-10% contamination	Genbank	d__Bacteria;p__Chloroflexota;c__Anaerolineae;o__Anaerolineales;f__E44-bin32;g__E44-bin32;s__	742	2035930	0	0	0	0	48.76	65	52.008
GCA_004525995.1_ASM452599v1_genomic	50-90% completeness AND/OR 5-10% contamination	Genbank	d__Bacteria;p__Chloroflexota;c__Anaerolineae;o__Anaerolineales;f__E44-bin32;g__E44-bin32;s__	605	2818580	0	4.47	75	1.1175	71.57	90	75.256
GCA_013139995.1_ASM1313999v1_genomic	50-90% completeness AND/OR 5-10% contamination	Genbank	d__Bacteria;p__Chloroflexota;c__Anaerolineae;o__Anaerolineales;f__E44-bin32;g__E44-bin32;s__	459	2426330	0	7.21	83.33	1.20191	78.97	65	76.176
GCA_015222305.1_ASM1522230v1_genomic	50-90% completeness AND/OR 5-10% contamination	Genbank	d__Bacteria;p__Chloroflexota;c__Anaerolineae;o__Anaerolineales;f__E44-bin32;g__E44-bin32;s__	465	1643110	0	1.72	0	1.72	57.85	20	50.28
GCA_004376465.1_ASM437646v1_genomic	50-90% completeness AND/OR 5-10% contamination	Genbank	d__Bacteria;p__Chloroflexota;c__Anaerolineae;o__Anaerolineales;f__E44-bin32;g__E44-bin32;s__E44-bin32 sp004376465	302	2902760	5.74591	0	0	0	72.81	75	73.248
167965	50-90% completeness AND/OR 5-10% contamination	PATRIC	d__Bacteria;p__Chloroflexota;c__Anaerolineae;o__Anaerolineales;f__EnvOPS12;g__;s__	398	3068670	0.706821	6.9	20	5.52	97.41	80	93.928
3300020202_7	50-90% completeness AND/OR 5-10% contamination	Nayfach et al.	d__Bacteria;p__Chloroflexota;c__Anaerolineae;o__Anaerolineales;f__envOPS12;g__;s__	523	2944490	0	0	0	0	72.99	95	77.392
3300025545_11	50-90% completeness AND/OR 5-10% contamination	Nayfach et al.	d__Bacteria;p__Chloroflexota;c__Anaerolineae;o__Anaerolineales;f__envOPS12;g__;s__	460	2611970	0.258043	0	0	0	43.98	85	52.184
3300025644_11	50-90% completeness AND/OR 5-10% contamination	Nayfach et al.	d__Bacteria;p__Chloroflexota;c__Anaerolineae;o__Anaerolineales;f__envOPS12;g__;s__	139	3947670	0.170734	6.9	0	6.9	98.28	90	96.624
3300026278_22	50-90% completeness AND/OR 5-10% contamination	Nayfach et al.	d__Bacteria;p__Chloroflexota;c__Anaerolineae;o__Anaerolineales;f__envOPS12;g__;s__	253	2.05943e+06	0	0	0	0	68.03	75	69.424
GCA_003818555.1_ASM381855v1_genomic	50-90% completeness AND/OR 5-10% contamination	Genbank	d__Bacteria;p__Chloroflexota;c__Anaerolineae;o__Anaerolineales;f__EnvOPS12;g__;s__	992	2789970	0.343731	0	0	0	52.3	60	53.84
GCA_015489255.1_ASM1548925v1_genomic	50-90% completeness AND/OR 5-10% contamination	Genbank	d__Bacteria;p__Chloroflexota;c__Anaerolineae;o__Anaerolineales;f__EnvOPS12;g__;s__	401	2198930	0.841318	3.79	33.33	2.52679	83.46	80	82.768
GCA_016927315.1_ASM1692731v1_genomic	50-90% completeness AND/OR 5-10% contamination	Genbank	d__Bacteria;p__Chloroflexota;c__Anaerolineae;o__Anaerolineales;f__EnvOPS12;g__;s__	130	3879210	0	1.72	0	1.72	94.83	70	89.864
1.90483e+06	50-90% completeness AND/OR 5-10% contamination	PATRIC	d__Bacteria;p__Chloroflexota;c__Anaerolineae;o__Anaerolineales;f__EnvOPS12;g__CG2-30-58-95;s__	82	2116350	0	0	0	0	86.21	100	88.968
3300013138_65	50-90% completeness AND/OR 5-10% contamination	Nayfach et al.	d__Bacteria;p__Chloroflexota;c__Anaerolineae;o__Anaerolineales;f__envOPS12;g__CG2-30-58-95;s__	103	2655220	0	0	0	0	74.92	80	75.936
3300017458_5	50-90% completeness AND/OR 5-10% contamination	Nayfach et al.	d__Bacteria;p__Chloroflexota;c__Anaerolineae;o__Anaerolineales;f__envOPS12;g__CG2-30-58-95;s__	400	2435080	0.704289	0.86	100	0	66.93	80	69.544
GCA_002796565.1_ASM279656v1_genomic	50-90% completeness AND/OR 5-10% contamination	Genbank	d__Bacteria;p__Chloroflexota;c__Anaerolineae;o__Anaerolineales;f__EnvOPS12;g__CG2-30-58-95;s__	471	1988970	0.218706	0.16	0	0.16	61.29	75	64.032
GCA_013824805.1_ASM1382480v1_genomic	50-90% completeness AND/OR 5-10% contamination	Genbank	d__Bacteria;p__Chloroflexota;c__Anaerolineae;o__Anaerolineales;f__EnvOPS12;g__CG2-30-58-95;s__	521	1753180	0	0.16	0	0.16	83.54	65	79.832
GCA_018830615.1_ASM1883061v1_genomic	50-90% completeness AND/OR 5-10% contamination	Genbank	d__Bacteria;p__Chloroflexota;c__Anaerolineae;o__Anaerolineales;f__EnvOPS12;g__CG2-30-58-95;s__	512	2547560	0	3.45	100	0	74.45	70	73.56
GCA_018898045.1_ASM1889804v1_genomic	50-90% completeness AND/OR 5-10% contamination	Genbank	d__Bacteria;p__Chloroflexota;c__Anaerolineae;o__Anaerolineales;f__EnvOPS12;g__CG2-30-58-95;s__	546	2.0957e+06	1.09605	0.16	0	0.16	70.97	65	69.776
GCA_001872165.1_ASM187216v1_genomic	50-90% completeness AND/OR 5-10% contamination	Genbank	d__Bacteria;p__Chloroflexota;c__Anaerolineae;o__Anaerolineales;f__EnvOPS12;g__CG2-30-58-95;s__CG2-30-58-95 sp001872165	243	1474360	0	0	0	0	68.97	60	67.176
GCA_002783275.1_ASM278327v1_genomic	50-90% completeness AND/OR 5-10% contamination	Genbank	d__Bacteria;p__Chloroflexota;c__Anaerolineae;o__Anaerolineales;f__EnvOPS12;g__CG2-30-58-95;s__CG2-30-58-95 sp001872165	171	1156530	0	0	0	0	53.29	55	53.632
3300015195_11	50-90% completeness AND/OR 5-10% contamination	Nayfach et al.	d__Bacteria;p__Chloroflexota;c__Anaerolineae;o__Anaerolineales;f__envOPS12;g__Fen-1038;s__	288	2043990	0.275931	0	0	0	77.27	80	77.816
3300026019_1	50-90% completeness AND/OR 5-10% contamination	Nayfach et al.	d__Bacteria;p__Chloroflexota;c__Anaerolineae;o__Anaerolineales;f__envOPS12;g__Fen-1038;s__	356	2130760	0.526103	4.31	66.67	1.43652	56.58	65	58.264
GCA_016178325.1_ASM1617832v1_genomic	50-90% completeness AND/OR 5-10% contamination	Genbank	d__Bacteria;p__Chloroflexota;c__Anaerolineae;o__Anaerolineales;f__EnvOPS12;g__Fen-1038;s__	514	2176310	0.261911	0.16	0	0.16	72.43	90	75.944
GCA_016200775.1_ASM1620077v1_genomic	50-90% completeness AND/OR 5-10% contamination	Genbank	d__Bacteria;p__Chloroflexota;c__Anaerolineae;o__Anaerolineales;f__EnvOPS12;g__Fen-1038;s__	703	2309890	0.32902	6.19	0	6.19	69.2	60	67.36
3300023258_7	50-90% completeness AND/OR 5-10% contamination	Nayfach et al.	d__Bacteria;p__Chloroflexota;c__Anaerolineae;o__Anaerolineales;f__envOPS12;g__Fen-1038;s__Fen-1038 sp003141915	427	2310350	0.325492	0	0	0	74.89	85	76.912
GCA_003141915.1_20120800_E1D_genomic	50-90% completeness AND/OR 5-10% contamination	Genbank	d__Bacteria;p__Chloroflexota;c__Anaerolineae;o__Anaerolineales;f__EnvOPS12;g__Fen-1038;s__Fen-1038 sp003141915	486	3100040	0	0.16	0	0.16	82.27	85	82.816
GCA_003158885.1_20120600_E1D_genomic	50-90% completeness AND/OR 5-10% contamination	Genbank	d__Bacteria;p__Chloroflexota;c__Anaerolineae;o__Anaerolineales;f__EnvOPS12;g__Fen-1038;s__Fen-1038 sp003158885	413	3071780	0.659878	0.16	0	0.16	80.4	85	81.32
GCA_003694975.1_ASM369497v1_genomic	50-90% completeness AND/OR 5-10% contamination	Genbank	d__Bacteria;p__Chloroflexota;c__Anaerolineae;o__Anaerolineales;f__EnvOPS12;g__J097;s__J097 sp003694975	363	2301830	0.861923	0.16	0	0.16	84.48	75	82.584
2.07312e+06	50-90% completeness AND/OR 5-10% contamination	PATRIC	d__Bacteria;p__Chloroflexota;c__Anaerolineae;o__Anaerolineales;f__EnvOPS12;g__JAABUE01;s__	527	3297200	0.213211	5.17	100	0	46.55	65	50.24
GCA_016928525.1_ASM1692852v1_genomic	50-90% completeness AND/OR 5-10% contamination	Genbank	d__Bacteria;p__Chloroflexota;c__Anaerolineae;o__Anaerolineales;f__EnvOPS12;g__JAABUE01;s__	402	5507780	0.468973	6.32	0	6.32	93.97	95	94.176
GCA_002085065.1_ASM208506v1_genomic	50-90% completeness AND/OR 5-10% contamination	Genbank	d__Bacteria;p__Chloroflexota;c__Anaerolineae;o__Anaerolineales;f__EnvOPS12;g__NIOZ-UU36;s__	300	1955540	1.16643	9.25	0	9.25	55.61	65	57.488
GCA_003648185.1_ASM364818v1_genomic	50-90% completeness AND/OR 5-10% contamination	Genbank	d__Bacteria;p__Chloroflexota;c__Anaerolineae;o__Anaerolineales;f__EnvOPS12;g__NIOZ-UU36;s__	470	1872460	0.742339	4.7	0	4.7	56.9	70	59.52
GCA_018648655.1_ASM1864865v1_genomic	50-90% completeness AND/OR 5-10% contamination	Genbank	d__Bacteria;p__Chloroflexota;c__Anaerolineae;o__Anaerolineales;f__EnvOPS12;g__NIOZ-UU36;s__	225	3067960	0.963181	1.72	100	0	89.97	90	89.976
GCA_018648685.1_ASM1864868v1_genomic	50-90% completeness AND/OR 5-10% contamination	Genbank	d__Bacteria;p__Chloroflexota;c__Anaerolineae;o__Anaerolineales;f__EnvOPS12;g__NIOZ-UU36;s__	215	3561900	1.15921	1.72	0	1.72	90.23	75	87.184
GCA_018654375.1_ASM1865437v1_genomic	50-90% completeness AND/OR 5-10% contamination	Genbank	d__Bacteria;p__Chloroflexota;c__Anaerolineae;o__Anaerolineales;f__EnvOPS12;g__NIOZ-UU36;s__	660	2946670	0.321719	3.06	40	1.836	71.55	70	71.24
GCA_018670975.1_ASM1867097v1_genomic	50-90% completeness AND/OR 5-10% contamination	Genbank	d__Bacteria;p__Chloroflexota;c__Anaerolineae;o__Anaerolineales;f__EnvOPS12;g__NIOZ-UU36;s__	238	3611970	0	5.17	0	5.17	98.28	95	97.624
GCA_013203745.1_ASM1320374v1_genomic	50-90% completeness AND/OR 5-10% contamination	Genbank	d__Bacteria;p__Chloroflexota;c__Anaerolineae;o__Anaerolineales;f__EnvOPS12;g__NIOZ-UU36;s__NIOZ-UU36 sp014382535	571	2468290	0.181097	1.72	100	0	70.94	55	67.752
167965	50-90% completeness AND/OR 5-10% contamination	PATRIC	d__Bacteria;p__Chloroflexota;c__Anaerolineae;o__Anaerolineales;f__EnvOPS12;g__OLB14;s__	219	3219530	0.163378	0	0	0	89.66	85	88.728
1.87252e+06	50-90% completeness AND/OR 5-10% contamination	PATRIC	d__Bacteria;p__Chloroflexota;c__Anaerolineae;o__Anaerolineales;f__EnvOPS12;g__OLB14;s__	192	4061670	0.775297	0	0	0	87.24	85	86.792
1.87252e+06	50-90% completeness AND/OR 5-10% contamination	PATRIC	d__Bacteria;p__Chloroflexota;c__Anaerolineae;o__Anaerolineales;f__EnvOPS12;g__OLB14;s__	319	3352450	0.505302	0	0	0	71.55	70	71.24
1.87252e+06	50-90% completeness AND/OR 5-10% contamination	PATRIC	d__Bacteria;p__Chloroflexota;c__Anaerolineae;o__Anaerolineales;f__EnvOPS12;g__OLB14;s__	179	1697250	0.484313	0.16	100	0	72.41	60	69.928
2.02672e+06	50-90% completeness AND/OR 5-10% contamination	PATRIC	d__Bacteria;p__Chloroflexota;c__Anaerolineae;o__Anaerolineales;f__EnvOPS12;g__OLB14;s__	157	1600680	0.624734	0.34	0	0.34	69.83	65	68.864
2.02672e+06	50-90% completeness AND/OR 5-10% contamination	PATRIC	d__Bacteria;p__Chloroflexota;c__Anaerolineae;o__Anaerolineales;f__EnvOPS12;g__OLB14;s__	529	2875900	0.298689	0.16	0	0.16	73.35	60	70.68
2.07312e+06	50-90% completeness AND/OR 5-10% contamination	PATRIC	d__Bacteria;p__Chloroflexota;c__Anaerolineae;o__Anaerolineales;f__EnvOPS12;g__OLB14;s__	641	2932100	0.283074	4.08	33.33	2.72014	73.56	70	72.848
2.07312e+06	50-90% completeness AND/OR 5-10% contamination	PATRIC	d__Bacteria;p__Chloroflexota;c__Anaerolineae;o__Anaerolineales;f__EnvOPS12;g__OLB14;s__	358	2739560	0.189081	0.16	0	0.16	84.48	75	82.584
2.07312e+06	50-90% completeness AND/OR 5-10% contamination	PATRIC	d__Bacteria;p__Chloroflexota;c__Anaerolineae;o__Anaerolineales;f__EnvOPS12;g__OLB14;s__	430	2564360	0.847385	0.31	100	0	70.69	90	74.552
3300000234_37	50-90% completeness AND/OR 5-10% contamination	Nayfach et al.	d__Bacteria;p__Chloroflexota;c__Anaerolineae;o__Anaerolineales;f__envOPS12;g__OLB14;s__	334	2127160	0.772861	1.1	100	0	49.06	85	56.248
3300013126_35	50-90% completeness AND/OR 5-10% contamination	Nayfach et al.	d__Bacteria;p__Chloroflexota;c__Anaerolineae;o__Anaerolineales;f__envOPS12;g__OLB14;s__	198	3487880	0.66258	0	0	0	86.21	90	86.968
3300017473_5	50-90% completeness AND/OR 5-10% contamination	Nayfach et al.	d__Bacteria;p__Chloroflexota;c__Anaerolineae;o__Anaerolineales;f__envOPS12;g__OLB14;s__	424	2957720	0.345536	0	0	0	74.14	75	74.312
3300020074_50	50-90% completeness AND/OR 5-10% contamination	Nayfach et al.	d__Bacteria;p__Chloroflexota;c__Anaerolineae;o__Anaerolineales;f__envOPS12;g__OLB14;s__	435	2377970	0	0	0	0	62.38	70	63.904
3300020213_27	50-90% completeness AND/OR 5-10% contamination	Nayfach et al.	d__Bacteria;p__Chloroflexota;c__Anaerolineae;o__Anaerolineales;f__envOPS12;g__OLB14;s__	502	2743960	0.512398	0	0	0	58.7	80	62.96
3300025525_13	50-90% completeness AND/OR 5-10% contamination	Nayfach et al.	d__Bacteria;p__Chloroflexota;c__Anaerolineae;o__Anaerolineales;f__envOPS12;g__OLB14;s__	467	2759360	0.536356	3.76	100	0	63.64	70	64.912
3300027851_42	50-90% completeness AND/OR 5-10% contamination	Nayfach et al.	d__Bacteria;p__Chloroflexota;c__Anaerolineae;o__Anaerolineales;f__envOPS12;g__OLB14;s__	443	2976580	0.113553	0	0	0	77.59	75	77.072
GCA_005777125.1_ASM577712v1_genomic	50-90% completeness AND/OR 5-10% contamination	Genbank	d__Bacteria;p__Chloroflexota;c__Anaerolineae;o__Anaerolineales;f__EnvOPS12;g__OLB14;s__	412	2930640	0.791977	6.9	50	3.45	67.4	65	66.92
GCA_011332195.1_ASM1133219v1_genomic	50-90% completeness AND/OR 5-10% contamination	Genbank	d__Bacteria;p__Chloroflexota;c__Anaerolineae;o__Anaerolineales;f__EnvOPS12;g__OLB14;s__	607	2251670	0.21051	7.84	45.45	4.27672	61.52	70	63.216
GCA_011367515.1_ASM1136751v1_genomic	50-90% completeness AND/OR 5-10% contamination	Genbank	d__Bacteria;p__Chloroflexota;c__Anaerolineae;o__Anaerolineales;f__EnvOPS12;g__OLB14;s__	827	2563950	0.368572	0.16	0	0.16	69.98	65	68.984
GCA_012033035.1_ASM1203303v1_genomic	50-90% completeness AND/OR 5-10% contamination	Genbank	d__Bacteria;p__Chloroflexota;c__Anaerolineae;o__Anaerolineales;f__EnvOPS12;g__OLB14;s__	314	1525620	0.909139	0	0	0	58.23	65	59.584
GCA_016183455.1_ASM1618345v1_genomic	50-90% completeness AND/OR 5-10% contamination	Genbank	d__Bacteria;p__Chloroflexota;c__Anaerolineae;o__Anaerolineales;f__EnvOPS12;g__OLB14;s__	748	3350820	0.453023	0.73	100	0	73.01	85	75.408
GCA_016191885.1_ASM1619188v1_genomic	50-90% completeness AND/OR 5-10% contamination	Genbank	d__Bacteria;p__Chloroflexota;c__Anaerolineae;o__Anaerolineales;f__EnvOPS12;g__OLB14;s__	361	3897810	0.850221	0	0	0	75.86	80	76.688
GCA_016191895.1_ASM1619189v1_genomic	50-90% completeness AND/OR 5-10% contamination	Genbank	d__Bacteria;p__Chloroflexota;c__Anaerolineae;o__Anaerolineales;f__EnvOPS12;g__OLB14;s__	367	2110670	0.113234	0	0	0	68.18	50	64.544
GCA_016191955.1_ASM1619195v1_genomic	50-90% completeness AND/OR 5-10% contamination	Genbank	d__Bacteria;p__Chloroflexota;c__Anaerolineae;o__Anaerolineales;f__EnvOPS12;g__OLB14;s__	370	4341410	1.60063	3.45	100	0	94.83	65	88.864
GCA_016191985.1_ASM1619198v1_genomic	50-90% completeness AND/OR 5-10% contamination	Genbank	d__Bacteria;p__Chloroflexota;c__Anaerolineae;o__Anaerolineales;f__EnvOPS12;g__OLB14;s__	304	3409650	0.95523	0.86	0	0.86	77.59	80	78.072
GCA_016219545.1_ASM1621954v1_genomic	50-90% completeness AND/OR 5-10% contamination	Genbank	d__Bacteria;p__Chloroflexota;c__Anaerolineae;o__Anaerolineales;f__EnvOPS12;g__OLB14;s__	68	4.15039e+06	2.97948	0	0	0	80.25	85	81.2
GCA_016234535.1_ASM1623453v1_genomic	50-90% completeness AND/OR 5-10% contamination	Genbank	d__Bacteria;p__Chloroflexota;c__Anaerolineae;o__Anaerolineales;f__EnvOPS12;g__OLB14;s__	268	4796620	0.557059	0.16	100	0	79.78	90	81.824
GCA_016789205.1_ASM1678920v1_genomic	50-90% completeness AND/OR 5-10% contamination	Genbank	d__Bacteria;p__Chloroflexota;c__Anaerolineae;o__Anaerolineales;f__EnvOPS12;g__OLB14;s__	433	1993260	1.10773	0.31	0	0.31	64.34	80	67.472
GCA_016789225.1_ASM1678922v1_genomic	50-90% completeness AND/OR 5-10% contamination	Genbank	d__Bacteria;p__Chloroflexota;c__Anaerolineae;o__Anaerolineales;f__EnvOPS12;g__OLB14;s__	256	2950060	1.16913	1.72	100	0	74.92	85	76.936
GCA_016789345.1_ASM1678934v1_genomic	50-90% completeness AND/OR 5-10% contamination	Genbank	d__Bacteria;p__Chloroflexota;c__Anaerolineae;o__Anaerolineales;f__EnvOPS12;g__OLB14;s__	289	3443580	0.426591	5.33	75	1.3325	89.73	80	87.784
GCA_016789485.1_ASM1678948v1_genomic	50-90% completeness AND/OR 5-10% contamination	Genbank	d__Bacteria;p__Chloroflexota;c__Anaerolineae;o__Anaerolineales;f__EnvOPS12;g__OLB14;s__	477	2828420	0.371586	0	0	0	80.09	70	78.072
GCA_016875755.1_JGI_2017-08-21_genomic	50-90% completeness AND/OR 5-10% contamination	Genbank	d__Bacteria;p__Chloroflexota;c__Anaerolineae;o__Anaerolineales;f__EnvOPS12;g__OLB14;s__	629	3138780	0.303303	0	0	0	87.98	90	88.384
GCA_017303735.1_ASM1730373v1_genomic	50-90% completeness AND/OR 5-10% contamination	Genbank	d__Bacteria;p__Chloroflexota;c__Anaerolineae;o__Anaerolineales;f__EnvOPS12;g__OLB14;s__	380	4797880	1.75848	6.9	60	2.76	81.39	90	83.112
GCA_900696635.1_CFX5_genomic	50-90% completeness AND/OR 5-10% contamination	Genbank	d__Bacteria;p__Chloroflexota;c__Anaerolineae;o__Anaerolineales;f__EnvOPS12;g__OLB14;s__	476	4.17485e+06	0.605531	12.88	29.41	9.09199	89.31	95	90.448
GCA_903885095.1_freshwater_MAG_---_LaPlata-15m-b_bin-317_genomic	50-90% completeness AND/OR 5-10% contamination	Genbank	d__Bacteria;p__Chloroflexota;c__Anaerolineae;o__Anaerolineales;f__EnvOPS12;g__OLB14;s__	970	3810770	0.379451	0.92	100	0	90.05	65	85.04
GCA_903891865.1_freshwater_MAG_---_LaPlata-15m-a_bin-598_genomic	50-90% completeness AND/OR 5-10% contamination	Genbank	d__Bacteria;p__Chloroflexota;c__Anaerolineae;o__Anaerolineales;f__EnvOPS12;g__OLB14;s__	860	2483630	0.12522	1.88	50	0.94	55.53	35	51.424
GCA_903960205.1_freshwater_MAG_---_Loc080925-6m_bin-1310_genomic	50-90% completeness AND/OR 5-10% contamination	Genbank	d__Bacteria;p__Chloroflexota;c__Anaerolineae;o__Anaerolineales;f__EnvOPS12;g__OLB14;s__	821	2572680	0.162088	3.45	50	1.725	72.93	10	60.344
3300026516_36	50-90% completeness AND/OR 5-10% contamination	Nayfach et al.	d__Bacteria;p__Chloroflexota;c__Anaerolineae;o__Anaerolineales;f__envOPS12;g__OLB14;s__OLB14 sp002343775	381	3758120	0.982406	0.57	100	0	78.13	95	81.504
GCA_002343775.1_ASM234377v1_genomic	50-90% completeness AND/OR 5-10% contamination	Genbank	d__Bacteria;p__Chloroflexota;c__Anaerolineae;o__Anaerolineales;f__EnvOPS12;g__OLB14;s__OLB14 sp002343775	34	4890310	6.56032	0	0	0	97.65	95	97.12
GCA_003519565.1_ASM351956v1_genomic	50-90% completeness AND/OR 5-10% contamination	Genbank	d__Bacteria;p__Chloroflexota;c__Anaerolineae;o__Anaerolineales;f__EnvOPS12;g__OLB14;s__OLB14 sp002345215	334	1836050	0.869257	0	0	0	54.75	65	56.8
3300013502_19	50-90% completeness AND/OR 5-10% contamination	Nayfach et al.	d__Bacteria;p__Chloroflexota;c__Anaerolineae;o__Anaerolineales;f__envOPS12;g__OLB14;s__OLB14 sp003524705	486	2810490	0.247288	1.72	0	1.72	65.55	75	67.44
GCA_003524705.1_ASM352470v1_genomic	50-90% completeness AND/OR 5-10% contamination	Genbank	d__Bacteria;p__Chloroflexota;c__Anaerolineae;o__Anaerolineales;f__EnvOPS12;g__OLB14;s__OLB14 sp003524705	494	2978070	0.185019	1.72	0	1.72	69.28	60	67.424
GCA_008363285.1_ASM836328v1_genomic	50-90% completeness AND/OR 5-10% contamination	Genbank	d__Bacteria;p__Chloroflexota;c__Anaerolineae;o__Anaerolineales;f__EnvOPS12;g__OLB14;s__OLB14 sp008363285	781	3985270	0.615266	1.88	0	1.88	71.63	75	72.304
GCA_009885525.1_ASM988552v1_genomic	50-90% completeness AND/OR 5-10% contamination	Genbank	d__Bacteria;p__Chloroflexota;c__Anaerolineae;o__Anaerolineales;f__EnvOPS12;g__OLB14;s__OLB14 sp009885525	206	4.09603e+06	0.516598	3.45	100	0	90.44	80	88.352
GCA_903824925.1_freshwater_MAG_---_LaPlata-b_bin-1477_genomic	50-90% completeness AND/OR 5-10% contamination	Genbank	d__Bacteria;p__Chloroflexota;c__Anaerolineae;o__Anaerolineales;f__EnvOPS12;g__OLB14;s__OLB14 sp903837815	837	2348400	0.115398	0.86	0	0.86	62.84	20	54.272
GCA_903862875.1_freshwater_MAG_---_LaPlata-a_bin-1352_genomic	50-90% completeness AND/OR 5-10% contamination	Genbank	d__Bacteria;p__Chloroflexota;c__Anaerolineae;o__Anaerolineales;f__EnvOPS12;g__OLB14;s__OLB14 sp903837815	924	2667480	0	3.45	33.33	2.30011	65.99	30	58.792
GCA_903892165.1_freshwater_MAG_---_LJ-3-4m_bin-0179_genomic	50-90% completeness AND/OR 5-10% contamination	Genbank	d__Bacteria;p__Chloroflexota;c__Anaerolineae;o__Anaerolineales;f__EnvOPS12;g__OLB14;s__OLB14 sp903914955	893	3331060	0.170816	3.45	33.33	2.30011	80.17	55	75.136
GCA_001796785.1_ASM179678v1_genomic	50-90% completeness AND/OR 5-10% contamination	Genbank	d__Bacteria;p__Chloroflexota;c__Anaerolineae;o__Anaerolineales;f__EnvOPS12;g__RBG-16-51-16;s__RBG-16-51-16 sp001796785	173	2262250	1.87601	0	0	0	81.03	85	81.824
3300013123_59	50-90% completeness AND/OR 5-10% contamination	Nayfach et al.	d__Bacteria;p__Chloroflexota;c__Anaerolineae;o__Anaerolineales;f__envOPS12;g__UBA12087;s__	102	1717050	4.93637	0	0	0	50	75	55
3300013125_60	50-90% completeness AND/OR 5-10% contamination	Nayfach et al.	d__Bacteria;p__Chloroflexota;c__Anaerolineae;o__Anaerolineales;f__envOPS12;g__UBA12087;s__	101	1949880	2.39707	0	0	0	62.07	85	66.656
3300013136_86	50-90% completeness AND/OR 5-10% contamination	Nayfach et al.	d__Bacteria;p__Chloroflexota;c__Anaerolineae;o__Anaerolineales;f__envOPS12;g__UBA12087;s__	16	1488130	0	0	0	0	63.79	75	66.032
GCA_003499965.1_ASM349996v1_genomic	50-90% completeness AND/OR 5-10% contamination	Genbank	d__Bacteria;p__Chloroflexota;c__Anaerolineae;o__Anaerolineales;f__EnvOPS12;g__UBA12087;s__UBA12087 sp001796335	15	1641670	0	0	0	0	58.62	75	61.896
2.07312e+06	50-90% completeness AND/OR 5-10% contamination	PATRIC	d__Bacteria;p__Chloroflexota;c__Anaerolineae;o__Anaerolineales;f__EnvOPS12;g__UBA12294;s__	74	3045760	0	0.86	100	0	79.31	80	79.448
2.07312e+06	50-90% completeness AND/OR 5-10% contamination	PATRIC	d__Bacteria;p__Chloroflexota;c__Anaerolineae;o__Anaerolineales;f__EnvOPS12;g__UBA12294;s__	511	2251010	0.339847	2.59	50	1.295	66.3	80	69.04
3300005294_8	50-90% completeness AND/OR 5-10% contamination	Nayfach et al.	d__Bacteria;p__Chloroflexota;c__Anaerolineae;o__Anaerolineales;f__envOPS12;g__UBA12294;s__	371	5981090	0.0849344	1.02	50	0.51	89.66	75	86.728
3300005518_26	50-90% completeness AND/OR 5-10% contamination	Nayfach et al.	d__Bacteria;p__Chloroflexota;c__Anaerolineae;o__Anaerolineales;f__envOPS12;g__UBA12294;s__	438	2301180	0.134279	0	0	0	58.7	45	55.96
3300009156_39	50-90% completeness AND/OR 5-10% contamination	Nayfach et al.	d__Bacteria;p__Chloroflexota;c__Anaerolineae;o__Anaerolineales;f__envOPS12;g__UBA12294;s__	631	3289720	0.469341	3.61	33.33	2.40679	77.15	60	73.72
3300012530_4	50-90% completeness AND/OR 5-10% contamination	Nayfach et al.	d__Bacteria;p__Chloroflexota;c__Anaerolineae;o__Anaerolineales;f__envOPS12;g__UBA12294;s__	571	3451260	0.495181	0	0	0	73.35	80	74.68
3300017444_63	50-90% completeness AND/OR 5-10% contamination	Nayfach et al.	d__Bacteria;p__Chloroflexota;c__Anaerolineae;o__Anaerolineales;f__envOPS12;g__UBA12294;s__	365	2604580	0.147049	1.18	33.33	0.786706	86.21	85	85.968
3300018465_6	50-90% completeness AND/OR 5-10% contamination	Nayfach et al.	d__Bacteria;p__Chloroflexota;c__Anaerolineae;o__Anaerolineales;f__envOPS12;g__UBA12294;s__	665	3898560	0.155699	1.88	100	0	63.24	80	66.592
3300019487_26	50-90% completeness AND/OR 5-10% contamination	Nayfach et al.	d__Bacteria;p__Chloroflexota;c__Anaerolineae;o__Anaerolineales;f__envOPS12;g__UBA12294;s__	91	2769170	0.861991	0	0	0	67.24	85	70.792
3300024430_5	50-90% completeness AND/OR 5-10% contamination	Nayfach et al.	d__Bacteria;p__Chloroflexota;c__Anaerolineae;o__Anaerolineales;f__envOPS12;g__UBA12294;s__	537	2905090	0.315653	0.86	100	0	66.14	85	69.912
GCA_003820075.1_ASM382007v1_genomic	50-90% completeness AND/OR 5-10% contamination	Genbank	d__Bacteria;p__Chloroflexota;c__Anaerolineae;o__Anaerolineales;f__EnvOPS12;g__UBA12294;s__	735	4843820	0.154011	5.17	75	1.2925	62.41	65	62.928
GCA_003820175.1_ASM382017v1_genomic	50-90% completeness AND/OR 5-10% contamination	Genbank	d__Bacteria;p__Chloroflexota;c__Anaerolineae;o__Anaerolineales;f__EnvOPS12;g__UBA12294;s__	1298	6949650	0.414697	30.31	75.86	7.31683	97.41	80	93.928
GCA_013335365.1_ASM1333536v1_genomic	50-90% completeness AND/OR 5-10% contamination	Genbank	d__Bacteria;p__Chloroflexota;c__Anaerolineae;o__Anaerolineales;f__EnvOPS12;g__UBA12294;s__	767	2300000	0.302609	3.24	80	0.648	61.76	40	57.408
GCA_003577395.1_ASM357739v1_genomic	50-90% completeness AND/OR 5-10% contamination	Genbank	d__Bacteria;p__Chloroflexota;c__Anaerolineae;o__Anaerolineales;f__EnvOPS12;g__UBA12294;s__UBA12294 sp003577395	18	3467920	0	0	0	0	85.27	90	86.216
3300000227_31	50-90% completeness AND/OR 5-10% contamination	Nayfach et al.	d__Bacteria;p__Chloroflexota;c__Anaerolineae;o__Anaerolineales;f__envOPS12;g__UBA5195;s__	171	1612150	0.818162	1.72	0	1.72	56.9	60	57.52
3300013123_24	50-90% completeness AND/OR 5-10% contamination	Nayfach et al.	d__Bacteria;p__Chloroflexota;c__Anaerolineae;o__Anaerolineales;f__envOPS12;g__UBA5195;s__	437	3883550	0.931364	0	0	0	71.47	70	71.176
3300017473_2	50-90% completeness AND/OR 5-10% contamination	Nayfach et al.	d__Bacteria;p__Chloroflexota;c__Anaerolineae;o__Anaerolineales;f__envOPS12;g__UBA5195;s__	523	4007190	1.54348	0	0	0	85.34	95	87.272
3300027373_22	50-90% completeness AND/OR 5-10% contamination	Nayfach et al.	d__Bacteria;p__Chloroflexota;c__Anaerolineae;o__Anaerolineales;f__envOPS12;g__UBA5195;s__	12	2245880	0	0	0	0	82.76	95	85.208
GCA_011362465.1_ASM1136246v1_genomic	50-90% completeness AND/OR 5-10% contamination	Genbank	d__Bacteria;p__Chloroflexota;c__Anaerolineae;o__Anaerolineales;f__EnvOPS12;g__UBA5195;s__	403	4175260	1.43632	5.17	75	1.2925	87.93	75	85.344
GCA_903923845.1_freshwater_MAG_---_LJ_bin-2409_genomic	50-90% completeness AND/OR 5-10% contamination	Genbank	d__Bacteria;p__Chloroflexota;c__Anaerolineae;o__Anaerolineales;f__EnvOPS12;g__UBA5195;s__	939	3269610	0.0556641	1.72	0	1.72	51.36	45	50.088
GCA_903831945.1_freshwater_MAG_---_LaPlata-a_bin-0504_genomic	50-90% completeness AND/OR 5-10% contamination	Genbank	d__Bacteria;p__Chloroflexota;c__Anaerolineae;o__Anaerolineales;f__EnvOPS12;g__UBA5195;s__UBA5195 sp005778035	410	1517690	1.09443	3.45	0	3.45	53.29	40	50.632
GCA_903929785.1_freshwater_MAG_---_LaPlata_bin-2408_genomic	50-90% completeness AND/OR 5-10% contamination	Genbank	d__Bacteria;p__Chloroflexota;c__Anaerolineae;o__Anaerolineales;f__EnvOPS12;g__UBA5195;s__UBA5195 sp005778035	291	2197810	1.15206	2.74	100	0	81.9	75	80.52
GCA_903871175.1_freshwater_MAG_---_LaPlata-15m-b_bin-362_genomic	50-90% completeness AND/OR 5-10% contamination	Genbank	d__Bacteria;p__Chloroflexota;c__Anaerolineae;o__Anaerolineales;f__EnvOPS12;g__UBA5195;s__UBA5195 sp903875215	814	2675380	0.175302	2.59	50	1.295	72.51	60	70.008
GCA_903908605.1_freshwater_MAG_---_Loclat_bin-05256_genomic	50-90% completeness AND/OR 5-10% contamination	Genbank	d__Bacteria;p__Chloroflexota;c__Anaerolineae;o__Anaerolineales;f__EnvOPS12;g__UBA5195;s__UBA5195 sp903908605	612	5770630	0.464421	0.16	0	0.16	93.1	75	89.48
GCA_903912105.1_freshwater_MAG_---_Ki1-2-7m_bin-732_genomic	50-90% completeness AND/OR 5-10% contamination	Genbank	d__Bacteria;p__Chloroflexota;c__Anaerolineae;o__Anaerolineales;f__EnvOPS12;g__UBA5195;s__UBA5195 sp903910795	1080	3337440	0	0	0	0	64.83	30	57.864
167965	50-90% completeness AND/OR 5-10% contamination	PATRIC	d__Bacteria;p__Chloroflexota;c__Anaerolineae;o__Anaerolineales;f__EnvOPS12;g__UBA5796;s__	135	1651010	0.554812	0	0	0	64.58	60	63.664
3300007352_35	50-90% completeness AND/OR 5-10% contamination	Nayfach et al.	d__Bacteria;p__Chloroflexota;c__Anaerolineae;o__Anaerolineales;f__envOPS12;g__UBA7227;s__	102	2201280	2.94919	0	0	0	50	70	54
GCA_001871895.1_ASM187189v1_genomic	50-90% completeness AND/OR 5-10% contamination	Genbank	d__Bacteria;p__Chloroflexota;c__Anaerolineae;o__Anaerolineales;f__EnvOPS12;g__UBA7227;s__	457	2362020	0.461893	1.72	100	0	62.93	85	67.344
3300021604_17	50-90% completeness AND/OR 5-10% contamination	Nayfach et al.	d__Bacteria;p__Chloroflexota;c__Anaerolineae;o__Anaerolineales;f__envOPS12;g__UBA7227;s__UBA7227 sp002473085	289	2483130	0.372916	1.72	100	0	84.48	75	82.584
GCA_002050195.1_ASM205019v1_genomic	50-90% completeness AND/OR 5-10% contamination	Genbank	d__Bacteria;p__Chloroflexota;c__Anaerolineae;o__Anaerolineales;f__EnvOPS12;g__UBA7227;s__UBA7227 sp002473085	281	2655950	0.586984	0	0	0	82.76	80	82.208
GCA_003598975.1_ASM359897v1_genomic	50-90% completeness AND/OR 5-10% contamination	Genbank	d__Bacteria;p__Chloroflexota;c__Anaerolineae;o__Anaerolineales;f__EnvOPS12;g__UBA7227;s__UBA7227 sp003598975	149	3943400	0.854846	0	0	0	83.54	95	85.832
GCA_009885445.1_ASM988544v1_genomic	50-90% completeness AND/OR 5-10% contamination	Genbank	d__Bacteria;p__Chloroflexota;c__Anaerolineae;o__Anaerolineales;f__EnvOPS12;g__UBA7227;s__UBA7227 sp009885445	404	2975100	0.371752	0	0	0	92.76	60	86.208
71864.7	50-90% completeness AND/OR 5-10% contamination	PATRIC	d__Bacteria;p__Chloroflexota;c__Anaerolineae;o__Anaerolineales;f__EnvOPS12;g__UBA877;s__	773	2160370	0.067581	1.02	0	1.02	74.5	80	75.6
3300018013_14	50-90% completeness AND/OR 5-10% contamination	Nayfach et al.	d__Bacteria;p__Chloroflexota;c__Anaerolineae;o__Anaerolineales;f__envOPS12;g__UBA877;s__	323	3949680	0.0827915	1.72	0	1.72	81.97	90	83.576
3300025469_11	50-90% completeness AND/OR 5-10% contamination	Nayfach et al.	d__Bacteria;p__Chloroflexota;c__Anaerolineae;o__Anaerolineales;f__envOPS12;g__UBA877;s__	440	2768720	0	0.57	100	0	74.45	75	74.56
3300025857_12	50-90% completeness AND/OR 5-10% contamination	Nayfach et al.	d__Bacteria;p__Chloroflexota;c__Anaerolineae;o__Anaerolineales;f__envOPS12;g__UBA877;s__	209	3037080	0	0	0	0	89.66	90	89.728
3300027515_28	50-90% completeness AND/OR 5-10% contamination	Nayfach et al.	d__Bacteria;p__Chloroflexota;c__Anaerolineae;o__Anaerolineales;f__envOPS12;g__UBA877;s__	254	2612360	0.185656	0.86	0	0.86	86.52	90	87.216
3300027726_3	50-90% completeness AND/OR 5-10% contamination	Nayfach et al.	d__Bacteria;p__Chloroflexota;c__Anaerolineae;o__Anaerolineales;f__envOPS12;g__UBA877;s__	382	3834200	0.131449	0.47	0	0.47	90.75	75	87.6
3300027792_13	50-90% completeness AND/OR 5-10% contamination	Nayfach et al.	d__Bacteria;p__Chloroflexota;c__Anaerolineae;o__Anaerolineales;f__envOPS12;g__UBA877;s__	481	2508380	0.15229	0	0	0	63.71	55	61.968
3300027863_168	50-90% completeness AND/OR 5-10% contamination	Nayfach et al.	d__Bacteria;p__Chloroflexota;c__Anaerolineae;o__Anaerolineales;f__envOPS12;g__UBA877;s__	269	1520380	0.322288	3.45	100	0	70.27	65	69.216
3300027896_81	50-90% completeness AND/OR 5-10% contamination	Nayfach et al.	d__Bacteria;p__Chloroflexota;c__Anaerolineae;o__Anaerolineales;f__envOPS12;g__UBA877;s__	249	1640100	0	1.72	100	0	74.61	60	71.688
GCA_014894075.1_ASM1489407v1_genomic	50-90% completeness AND/OR 5-10% contamination	Genbank	d__Bacteria;p__Chloroflexota;c__Anaerolineae;o__Anaerolineales;f__EnvOPS12;g__UBA877;s__	612	2783470	1.26784	8.65	6.67	8.07305	87.93	85	87.344
GCA_016208355.1_ASM1620835v1_genomic	50-90% completeness AND/OR 5-10% contamination	Genbank	d__Bacteria;p__Chloroflexota;c__Anaerolineae;o__Anaerolineales;f__EnvOPS12;g__UBA877;s__	205	2762130	0	1.88	100	0	87.93	85	87.344
GCA_017882065.1_ASM1788206v1_genomic	50-90% completeness AND/OR 5-10% contamination	Genbank	d__Bacteria;p__Chloroflexota;c__Anaerolineae;o__Anaerolineales;f__EnvOPS12;g__UBA877;s__	222	1873700	0.689545	0.31	100	0	81.03	70	78.824
GCA_017882145.1_ASM1788214v1_genomic	50-90% completeness AND/OR 5-10% contamination	Genbank	d__Bacteria;p__Chloroflexota;c__Anaerolineae;o__Anaerolineales;f__EnvOPS12;g__UBA877;s__	448	4.15407e+06	0	1.72	100	0	88.87	85	88.096
GCA_903888775.1_freshwater_MAG_---_AlinenSediments_bin-0506_genomic	50-90% completeness AND/OR 5-10% contamination	Genbank	d__Bacteria;p__Chloroflexota;c__Anaerolineae;o__Anaerolineales;f__EnvOPS12;g__UBA877;s__	1435	4108010	0	3.45	0	3.45	56.6	25	50.28
GCA_903926135.1_freshwater_MAG_---_AM-sed-core1-D2_bin-025_genomic	50-90% completeness AND/OR 5-10% contamination	Genbank	d__Bacteria;p__Chloroflexota;c__Anaerolineae;o__Anaerolineales;f__EnvOPS12;g__UBA877;s__	808	2833520	0.0885824	2.93	0	2.93	80.8	55	75.64
GCA_002294405.1_ASM229440v1_genomic	50-90% completeness AND/OR 5-10% contamination	Genbank	d__Bacteria;p__Chloroflexota;c__Anaerolineae;o__Anaerolineales;f__EnvOPS12;g__UBA877;s__UBA877 sp002294405	57	1444910	0	0	0	0	63.01	50	60.408
GCA_903829085.1_freshwater_MAG_---_AlinenSedimentsD0_bin-0676_genomic	50-90% completeness AND/OR 5-10% contamination	Genbank	d__Bacteria;p__Chloroflexota;c__Anaerolineae;o__Anaerolineales;f__EnvOPS12;g__UBA877;s__UBA877 sp903829085	410	3243720	0	5.33	60	2.132	81.03	80	80.824
GCA_903849545.1_freshwater_MAG_---_AM-sed-core1-D0_bin-607_genomic	50-90% completeness AND/OR 5-10% contamination	Genbank	d__Bacteria;p__Chloroflexota;c__Anaerolineae;o__Anaerolineales;f__EnvOPS12;g__UBA877;s__UBA877 sp903829085	814	2122530	0.125322	3.53	22.22	2.74563	53.69	45	51.952
GCA_903860415.1_freshwater_MAG_---_AM-sed-core3-D0_bin-409_genomic	50-90% completeness AND/OR 5-10% contamination	Genbank	d__Bacteria;p__Chloroflexota;c__Anaerolineae;o__Anaerolineales;f__EnvOPS12;g__UBA877;s__UBA877 sp903829085	1005	2953500	0	1.55	100	0	75.52	40	68.416
GCA_903878955.1_freshwater_MAG_---_AM-sed-core2-D0_bin-0703_genomic	50-90% completeness AND/OR 5-10% contamination	Genbank	d__Bacteria;p__Chloroflexota;c__Anaerolineae;o__Anaerolineales;f__EnvOPS12;g__UBA877;s__UBA877 sp903829085	963	2695610	0	4.08	33.33	2.72014	69.95	50	65.96
444458	50-90% completeness AND/OR 5-10% contamination	PATRIC	d__Bacteria;p__Chloroflexota;c__Anaerolineae;o__Anaerolineales;f__EnvOPS12;g__UBA877;s__UBA877 sp903884265	194	1659150	0	1.94	50	0.97	63.79	60	63.032
GCA_003446435.1_ASM344643v1_genomic	50-90% completeness AND/OR 5-10% contamination	Genbank	d__Bacteria;p__Chloroflexota;c__Anaerolineae;o__Anaerolineales;f__EnvOPS12;g__UBA8950;s__	457	2674100	0	0	0	0	71.55	65	70.24
GCA_013359445.1_ASM1335944v1_genomic	50-90% completeness AND/OR 5-10% contamination	Genbank	d__Bacteria;p__Chloroflexota;c__Anaerolineae;o__Anaerolineales;f__JABWBV01;g__JABWBV01;s__JABWBV01 sp013359445	822	7042350	0.683153	5.33	0	5.33	88.48	95	89.784
GCA_016208285.1_ASM1620828v1_genomic	50-90% completeness AND/OR 5-10% contamination	Genbank	d__Bacteria;p__Chloroflexota;c__Anaerolineae;o__Anaerolineales;f__RBG-16-64-43;g__;s__	790	3433600	0.4089	3.61	33.33	2.40679	63.48	60	62.784
3300027743_12	50-90% completeness AND/OR 5-10% contamination	Nayfach et al.	d__Bacteria;p__Chloroflexota;c__Anaerolineae;o__Anaerolineales;f__RBG-16-64-43;g__FEN-1073;s__	440	2351420	0	0	0	0	69.84	65	68.872
GCA_001796965.1_ASM179696v1_genomic	50-90% completeness AND/OR 5-10% contamination	Genbank	d__Bacteria;p__Chloroflexota;c__Anaerolineae;o__Anaerolineales;f__RBG-16-64-43;g__RBG-16-64-43;s__RBG-16-64-43 sp001796965	177	1806600	0.738404	0	0	0	71.79	85	74.432
3300028399_14	50-90% completeness AND/OR 5-10% contamination	Nayfach et al.	d__Bacteria;p__Chloroflexota;c__Anaerolineae;o__Anaerolineales;f__UBA11579;g__;s__	390	3136380	1.58909	1.72	100	0	80.02	90	82.016
GCA_004375765.1_ASM437576v1_genomic	50-90% completeness AND/OR 5-10% contamination	Genbank	d__Bacteria;p__Chloroflexota;c__Anaerolineae;o__Anaerolineales;f__UBA11579;g__;s__	324	1342310	1.59203	6.27	4.76	5.97155	62.93	55	61.344
GCA_019637725.1_ASM1963772v1_genomic	50-90% completeness AND/OR 5-10% contamination	Genbank	d__Bacteria;p__Chloroflexota;c__Anaerolineae;o__Anaerolineales;f__UBA11579;g__;s__	181	1847600	1.45053	0	0	0	83.54	50	76.832
GCA_016926675.1_ASM1692667v1_genomic	50-90% completeness AND/OR 5-10% contamination	Genbank	d__Bacteria;p__Chloroflexota;c__Anaerolineae;o__Anaerolineales;f__UBA11579;g__CFX15;s__	27	1686170	1.57102	0	0	0	77.43	90	79.944
GCA_016935415.1_ASM1693541v1_genomic	50-90% completeness AND/OR 5-10% contamination	Genbank	d__Bacteria;p__Chloroflexota;c__Anaerolineae;o__Anaerolineales;f__UBA11579;g__CFX15;s__	425	4907450	1.85758	0	0	0	87.93	75	85.344
GCA_009391835.1_ASM939183v1_genomic	50-90% completeness AND/OR 5-10% contamination	Genbank	d__Bacteria;p__Chloroflexota;c__Anaerolineae;o__Anaerolineales;f__UBA11579;g__QWJF01;s__QWJF01 sp009391835	64	1684170	3.57446	1.72	0	1.72	76.49	100	81.192
GCA_004297445.1_ASM429744v1_genomic	50-90% completeness AND/OR 5-10% contamination	Genbank	d__Bacteria;p__Chloroflexota;c__Anaerolineae;o__Anaerolineales;f__UBA11579;g__SCUK01;s__SCUK01 sp004297445	84	3245090	2.87326	0	0	0	86.21	95	87.968
2.07312e+06	50-90% completeness AND/OR 5-10% contamination	PATRIC	d__Bacteria;p__Chloroflexota;c__Anaerolineae;o__Anaerolineales;f__UBA11579;g__UBA11579;s__	63	2219900	2.01045	1.02	50	0.51	77.43	95	80.944
GCA_016932165.1_ASM1693216v1_genomic	50-90% completeness AND/OR 5-10% contamination	Genbank	d__Bacteria;p__Chloroflexota;c__Anaerolineae;o__Anaerolineales;f__UBA11579;g__UBA11579;s__	128	3129670	4.6024	0.86	0	0.86	87.77	80	86.216
GCA_003250455.1_ASM325045v1_genomic	50-90% completeness AND/OR 5-10% contamination	Genbank	d__Bacteria;p__Chloroflexota;c__Anaerolineae;o__Anaerolineales;f__UBA11579;g__UBA11579;s__UBA11579 sp003250455	586	3122140	0.396843	2.07	50	1.035	83.31	50	76.648
GCA_003486225.1_ASM348622v1_genomic	50-90% completeness AND/OR 5-10% contamination	Genbank	d__Bacteria;p__Chloroflexota;c__Anaerolineae;o__Anaerolineales;f__UBA11579;g__UBA11579;s__UBA11579 sp003486225	350	2670960	1.36093	0	0	0	69.4	75	70.52
3300026188_15	50-90% completeness AND/OR 5-10% contamination	Nayfach et al.	d__Bacteria;p__Chloroflexota;c__Anaerolineae;o__Anaerolineales;f__UBA11657;g__;s__	219	1851440	0	1.72	0	1.72	82.29	65	78.832
3300026204_25	50-90% completeness AND/OR 5-10% contamination	Nayfach et al.	d__Bacteria;p__Chloroflexota;c__Anaerolineae;o__Anaerolineales;f__UBA11657;g__;s__	250	1388400	0	1.72	0	1.72	72.52	75	73.016
3300026267_19	50-90% completeness AND/OR 5-10% contamination	Nayfach et al.	d__Bacteria;p__Chloroflexota;c__Anaerolineae;o__Anaerolineales;f__UBA11657;g__;s__	193	1262480	0	2.07	100	0	72.57	75	73.056
GCA_002730415.1_ASM273041v1_genomic	50-90% completeness AND/OR 5-10% contamination	Genbank	d__Bacteria;p__Chloroflexota;c__Anaerolineae;o__Anaerolineales;f__UBA11657;g__;s__	91	1160650	0	1.72	100	0	62.77	85	67.216
GCA_913031335.1_ERR599127_bin.8_MetaBAT_v2.12.1_MAG_genomic	50-90% completeness AND/OR 5-10% contamination	Genbank	d__Bacteria;p__Chloroflexota;c__Anaerolineae;o__Anaerolineales;f__UBA11657;g__;s__	351	1725530	0	0.86	0	0.86	75.27	65	73.216
GCA_003670425.1_ASM367042v1_genomic	50-90% completeness AND/OR 5-10% contamination	Genbank	d__Bacteria;p__Chloroflexota;c__Anaerolineae;o__Anaerolineales;f__UBA11657;g__BD1;s__BD1 sp003670425	174	2.08199e+06	0	0	0	0	70.69	70	70.552
GCA_003670495.1_ASM367049v1_genomic	50-90% completeness AND/OR 5-10% contamination	Genbank	d__Bacteria;p__Chloroflexota;c__Anaerolineae;o__Anaerolineales;f__UBA11657;g__BD1;s__BD1 sp003670425	146	1871690	0	0.34	100	0	80.41	70	78.328
GCA_003670555.1_ASM367055v1_genomic	50-90% completeness AND/OR 5-10% contamination	Genbank	d__Bacteria;p__Chloroflexota;c__Anaerolineae;o__Anaerolineales;f__UBA11657;g__BD1;s__BD1 sp003670425	228	1549870	0	0.16	100	0	72.96	40	66.368
3300006902_26	50-90% completeness AND/OR 5-10% contamination	Nayfach et al.	d__Bacteria;p__Chloroflexota;c__Anaerolineae;o__Anaerolineales;f__UBA11657;g__UBA11657;s__	242	1316400	0	0	0	0	62.62	75	65.096
GCA_002724995.1_ASM272499v1_genomic	50-90% completeness AND/OR 5-10% contamination	Genbank	d__Bacteria;p__Chloroflexota;c__Anaerolineae;o__Anaerolineales;f__UBA11657;g__UBA11657;s__	64	1458110	0	1.72	0	1.72	62.46	55	60.968
GCA_002296125.1_ASM229612v1_genomic	50-90% completeness AND/OR 5-10% contamination	Genbank	d__Bacteria;p__Chloroflexota;c__Anaerolineae;o__Anaerolineales;f__UBA11657;g__UBA11657;s__UBA11657 sp002296125	147	2010090	0	0	0	0	90.75	85	89.6
GCA_003449775.1_ASM344977v1_genomic	50-90% completeness AND/OR 5-10% contamination	Genbank	d__Bacteria;p__Chloroflexota;c__Anaerolineae;o__Anaerolineales;f__UBA11657;g__UBA11657;s__UBA11657 sp002296125	280	1795100	0	1.72	0	1.72	71	90	74.8
GCA_002311455.1_ASM231145v1_genomic	50-90% completeness AND/OR 5-10% contamination	Genbank	d__Bacteria;p__Chloroflexota;c__Anaerolineae;o__Anaerolineales;f__UBA11657;g__UBA11657;s__UBA11657 sp002311455	126	2018690	0	0	0	0	87.46	85	86.968
GCA_002716675.1_ASM271667v1_genomic	50-90% completeness AND/OR 5-10% contamination	Genbank	d__Bacteria;p__Chloroflexota;c__Anaerolineae;o__Anaerolineales;f__UBA11657;g__UBA11657;s__UBA11657 sp002377585	35	1033730	0	0	0	0	69.75	60	67.8
GCA_002727295.1_ASM272729v1_genomic	50-90% completeness AND/OR 5-10% contamination	Genbank	d__Bacteria;p__Chloroflexota;c__Anaerolineae;o__Anaerolineales;f__UBA11657;g__UBA11657;s__UBA11657 sp002377585	32	1878160	0	2.59	66.67	0.863247	77.43	90	79.944
GCA_003540985.1_ASM354098v1_genomic	50-90% completeness AND/OR 5-10% contamination	Genbank	d__Bacteria;p__Chloroflexota;c__Anaerolineae;o__Anaerolineales;f__UBA11657;g__UBA11657;s__UBA11657 sp002377585	279	1988750	0	3.45	0	3.45	78.68	80	78.944
3300021504_12	50-90% completeness AND/OR 5-10% contamination	Nayfach et al.	d__Bacteria;p__Chloroflexota;c__Anaerolineae;o__Anaerolineales;f__UBA11858;g__;s__	293	1634100	0	0.16	0	0.16	64.42	60	63.536
3300024243_15	50-90% completeness AND/OR 5-10% contamination	Nayfach et al.	d__Bacteria;p__Chloroflexota;c__Anaerolineae;o__Anaerolineales;f__UBA11858;g__;s__	440	2712380	0.57809	1.72	0	1.72	69.36	80	71.488
3300025649_12	50-90% completeness AND/OR 5-10% contamination	Nayfach et al.	d__Bacteria;p__Chloroflexota;c__Anaerolineae;o__Anaerolineales;f__UBA11858;g__;s__	414	2545090	0.883269	0	0	0	55.09	60	56.072
3300027834_65	50-90% completeness AND/OR 5-10% contamination	Nayfach et al.	d__Bacteria;p__Chloroflexota;c__Anaerolineae;o__Anaerolineales;f__UBA11858;g__;s__	340	2036720	0	2.07	50	1.035	81.58	75	80.264
3300027962_22	50-90% completeness AND/OR 5-10% contamination	Nayfach et al.	d__Bacteria;p__Chloroflexota;c__Anaerolineae;o__Anaerolineales;f__UBA11858;g__;s__	111	2282840	0	0	0	0	80.8	90	82.64
GCA_015222185.1_ASM1522218v1_genomic	50-90% completeness AND/OR 5-10% contamination	Genbank	d__Bacteria;p__Chloroflexota;c__Anaerolineae;o__Anaerolineales;f__UBA11858;g__;s__	246	1933720	0.518689	1.72	0	1.72	58.86	50	57.088
2.07312e+06	50-90% completeness AND/OR 5-10% contamination	PATRIC	d__Bacteria;p__Chloroflexota;c__Anaerolineae;o__Anaerolineales;f__UBA11858;g__B10-G9;s__	650	2085870	0.381136	0.86	100	0	60.63	70	62.504
GCA_002084715.1_ASM208471v1_genomic	50-90% completeness AND/OR 5-10% contamination	Genbank	d__Bacteria;p__Chloroflexota;c__Anaerolineae;o__Anaerolineales;f__UBA11858;g__B10-G9;s__	274	2550590	1.75254	4.39	12.5	3.84125	48.12	60	50.496
GCA_002084745.1_ASM208474v1_genomic	50-90% completeness AND/OR 5-10% contamination	Genbank	d__Bacteria;p__Chloroflexota;c__Anaerolineae;o__Anaerolineales;f__UBA11858;g__B10-G9;s__	311	2814170	3.52893	7.52	0	7.52	55.64	70	58.512
GCA_003648145.1_ASM364814v1_genomic	50-90% completeness AND/OR 5-10% contamination	Genbank	d__Bacteria;p__Chloroflexota;c__Anaerolineae;o__Anaerolineales;f__UBA11858;g__B10-G9;s__	700	3653630	0.361558	8.62	50	4.31	73.2	85	75.56
GCA_011039935.1_ASM1103993v1_genomic	50-90% completeness AND/OR 5-10% contamination	Genbank	d__Bacteria;p__Chloroflexota;c__Anaerolineae;o__Anaerolineales;f__UBA11858;g__B10-G9;s__	199	2013900	0	3.45	50	1.725	69.56	85	72.648
GCA_013139005.1_ASM1313900v1_genomic	50-90% completeness AND/OR 5-10% contamination	Genbank	d__Bacteria;p__Chloroflexota;c__Anaerolineae;o__Anaerolineales;f__UBA11858;g__B10-G9;s__	327	2278400	0	4.47	50	2.235	84.73	85	84.784
GCA_013202705.1_ASM1320270v1_genomic	50-90% completeness AND/OR 5-10% contamination	Genbank	d__Bacteria;p__Chloroflexota;c__Anaerolineae;o__Anaerolineales;f__UBA11858;g__B10-G9;s__	451	1732600	0	0	0	0	56.92	45	54.536
GCA_018263575.1_ASM1826357v1_genomic	50-90% completeness AND/OR 5-10% contamination	Genbank	d__Bacteria;p__Chloroflexota;c__Anaerolineae;o__Anaerolineales;f__UBA11858;g__B10-G9;s__	121	2710950	5.34683	0	0	0	92.95	95	93.36
GCA_018334945.1_ASM1833494v1_genomic	50-90% completeness AND/OR 5-10% contamination	Genbank	d__Bacteria;p__Chloroflexota;c__Anaerolineae;o__Anaerolineales;f__UBA11858;g__B10-G9;s__	360	1865940	1.85644	0.16	0	0.16	72.96	80	74.368
GCA_021161345.1_ASM2116134v1_genomic	50-90% completeness AND/OR 5-10% contamination	Genbank	d__Bacteria;p__Chloroflexota;c__Anaerolineae;o__Anaerolineales;f__UBA11858;g__B10-G9;s__	288	2691760	0	6.03	16.67	5.0248	93.5	90	92.8
GCA_003648195.1_ASM364819v1_genomic	50-90% completeness AND/OR 5-10% contamination	Genbank	d__Bacteria;p__Chloroflexota;c__Anaerolineae;o__Anaerolineales;f__UBA11858;g__B10-G9;s__B10-G9 sp003648195	327	2982930	1.16764	5.17	0	5.17	90.36	90	90.288
GCA_011176615.1_ASM1117661v1_genomic	50-90% completeness AND/OR 5-10% contamination	Genbank	d__Bacteria;p__Chloroflexota;c__Anaerolineae;o__Anaerolineales;f__UBA11858;g__G519;s__G519 sp011176615	168	2.09589e+06	2.49918	1.72	0	1.72	86.05	75	83.84
GCA_021160505.1_ASM2116050v1_genomic	50-90% completeness AND/OR 5-10% contamination	Genbank	d__Bacteria;p__Chloroflexota;c__Anaerolineae;o__Anaerolineales;f__UBA11858;g__G519;s__G519 sp011176615	342	2038810	1.10996	1.72	0	1.72	69.67	75	70.736
GCA_015485245.1_ASM1548524v1_genomic	50-90% completeness AND/OR 5-10% contamination	Genbank	d__Bacteria;p__Chloroflexota;c__Anaerolineae;o__Anaerolineales;f__UBA11858;g__J130;s__	513	2616450	1.447	1.88	0	1.88	74.92	90	77.936
GCA_003694235.1_ASM369423v1_genomic	50-90% completeness AND/OR 5-10% contamination	Genbank	d__Bacteria;p__Chloroflexota;c__Anaerolineae;o__Anaerolineales;f__UBA11858;g__J130;s__J130 sp003694235	344	1780670	0.899661	0	0	0	77.59	85	79.072
GCA_015767335.1_ASM1576733v1_genomic	50-90% completeness AND/OR 5-10% contamination	Genbank	d__Bacteria;p__Chloroflexota;c__Anaerolineae;o__Anaerolineales;f__UBA11858;g__NIOZ-UU35;s__	191	1443670	2.22004	0.31	0	0.31	49.84	55	50.872
GCA_016783125.1_ASM1678312v1_genomic	50-90% completeness AND/OR 5-10% contamination	Genbank	d__Bacteria;p__Chloroflexota;c__Anaerolineae;o__Anaerolineales;f__UBA11858;g__NIOZ-UU35;s__	318	4332940	0.475197	0	0	0	74.97	85	76.976
GCA_016785015.1_ASM1678501v1_genomic	50-90% completeness AND/OR 5-10% contamination	Genbank	d__Bacteria;p__Chloroflexota;c__Anaerolineae;o__Anaerolineales;f__UBA11858;g__NIOZ-UU35;s__	243	4945590	0.606601	2.59	0	2.59	88.24	90	88.592
GCA_014382605.1_ASM1438260v1_genomic	50-90% completeness AND/OR 5-10% contamination	Genbank	d__Bacteria;p__Chloroflexota;c__Anaerolineae;o__Anaerolineales;f__UBA11858;g__NIOZ-UU35;s__NIOZ-UU35 sp014382605	339	3661780	1.08554	1.72	0	1.72	89.66	85	88.728
GCA_016776485.1_ASM1677648v1_genomic	50-90% completeness AND/OR 5-10% contamination	Genbank	d__Bacteria;p__Chloroflexota;c__Anaerolineae;o__Anaerolineales;f__UBA11858;g__NIOZ-UU35;s__NIOZ-UU35 sp014382605	208	2011710	1.27006	0.16	100	0	55.17	55	55.136
GCA_012961225.1_ASM1296122v1_genomic	50-90% completeness AND/OR 5-10% contamination	Genbank	d__Bacteria;p__Chloroflexota;c__Anaerolineae;o__Anaerolineales;f__UBA11858;g__UBA11858;s__	619	1722900	0.913576	5.33	40	3.198	74.95	20	63.96
GCA_016929975.1_ASM1692997v1_genomic	50-90% completeness AND/OR 5-10% contamination	Genbank	d__Bacteria;p__Chloroflexota;c__Anaerolineae;o__Anaerolineales;f__UBA11858;g__UBA11858;s__	649	4081390	0.819819	3.45	0	3.45	80.96	80	80.768
GCA_018812425.1_ASM1881242v1_genomic	50-90% completeness AND/OR 5-10% contamination	Genbank	d__Bacteria;p__Chloroflexota;c__Anaerolineae;o__Anaerolineales;f__UBA11858;g__UBA11858;s__	619	3279320	0.827001	2.23	66.67	0.743259	75.94	85	77.752
GCA_018822265.1_ASM1882226v1_genomic	50-90% completeness AND/OR 5-10% contamination	Genbank	d__Bacteria;p__Chloroflexota;c__Anaerolineae;o__Anaerolineales;f__UBA11858;g__UBA11858;s__	756	3336060	1.01887	5.17	0	5.17	77.59	75	77.072
GCA_003512075.1_ASM351207v1_genomic	50-90% completeness AND/OR 5-10% contamination	Genbank	d__Bacteria;p__Chloroflexota;c__Anaerolineae;o__Anaerolineales;f__UBA11858;g__UBA11858;s__UBA11858 sp003513015	502	3561550	1.00321	0	0	0	81.03	80	80.824
GCA_003513015.1_ASM351301v1_genomic	50-90% completeness AND/OR 5-10% contamination	Genbank	d__Bacteria;p__Chloroflexota;c__Anaerolineae;o__Anaerolineales;f__UBA11858;g__UBA11858;s__UBA11858 sp003513015	548	3717880	0.615136	0	0	0	82.84	80	82.272
3300027917_64	50-90% completeness AND/OR 5-10% contamination	Nayfach et al.	d__Bacteria;p__Chloroflexota;c__Anaerolineae;o__Anaerolineales;f__UBA4823_A;g__9FT-COMBO-55-16;s__	242	3467640	2.78922	0	0	0	89.66	80	87.728
2.07312e+06	50-90% completeness AND/OR 5-10% contamination	PATRIC	d__Bacteria;p__Chloroflexota;c__Anaerolineae;o__Anaerolineales;f__UBA4823;g__;s__	98	1953350	1.33873	0	0	0	58.46	50	56.768
GCA_001795125.1_ASM179512v1_genomic	50-90% completeness AND/OR 5-10% contamination	Genbank	d__Bacteria;p__Chloroflexota;c__Anaerolineae;o__Anaerolineales;f__UBA4823;g__;s__	173	3822990	6.97674	5.17	0	5.17	76.96	90	79.568
GCA_016926415.1_ASM1692641v1_genomic	50-90% completeness AND/OR 5-10% contamination	Genbank	d__Bacteria;p__Chloroflexota;c__Anaerolineae;o__Anaerolineales;f__UBA4823;g__;s__	238	4627770	3.01376	1.72	0	1.72	89.5	90	89.6
GCA_017860695.1_ASM1786069v1_genomic	50-90% completeness AND/OR 5-10% contamination	Genbank	d__Bacteria;p__Chloroflexota;c__Anaerolineae;o__Anaerolineales;f__UBA4823;g__;s__	412	2600970	0.26913	5.25	88.89	0.583275	74.84	75	74.872
GCA_001795335.1_ASM179533v1_genomic	50-90% completeness AND/OR 5-10% contamination	Genbank	d__Bacteria;p__Chloroflexota;c__Anaerolineae;o__Anaerolineales;f__UBA4823;g__9FT-COMBO-55-16;s__9FT-COMBO-55-16 sp001795335	155	2529840	2.8737	0	0	0	62.85	60	62.28
GCA_017860725.1_ASM1786072v1_genomic	50-90% completeness AND/OR 5-10% contamination	Genbank	d__Bacteria;p__Chloroflexota;c__Anaerolineae;o__Anaerolineales;f__UBA4823;g__CAIQIV01;s__	509	3354340	1.19338	5.17	0	5.17	86.13	75	83.904
GCA_903871905.1_freshwater_MAG_---_LaPlata_bin-0303_genomic	50-90% completeness AND/OR 5-10% contamination	Genbank	d__Bacteria;p__Chloroflexota;c__Anaerolineae;o__Anaerolineales;f__UBA4823;g__CAIQIV01;s__CAIQIV01 sp903871905	865	6099430	0.631698	2.59	50	1.295	73.04	75	73.432
GCA_903905035.1_freshwater_MAG_---_LaPlata-15m-a_bin-236_genomic	50-90% completeness AND/OR 5-10% contamination	Genbank	d__Bacteria;p__Chloroflexota;c__Anaerolineae;o__Anaerolineales;f__UBA4823;g__CAIQIV01;s__CAIQIV01 sp903871905	1222	3235060	0.213906	1.88	50	0.94	60.97	35	55.776
GCA_003819735.1_ASM381973v1_genomic	50-90% completeness AND/OR 5-10% contamination	Genbank	d__Bacteria;p__Chloroflexota;c__Anaerolineae;o__Anaerolineales;f__UBA4823;g__CAIQJJ01;s__	1324	5556860	0.373772	7.05	80	1.41	86.44	60	81.152
GCA_003820065.1_ASM382006v1_genomic	50-90% completeness AND/OR 5-10% contamination	Genbank	d__Bacteria;p__Chloroflexota;c__Anaerolineae;o__Anaerolineales;f__UBA4823;g__CAIQJJ01;s__	1127	5626750	0.97854	1.72	100	0	89.66	65	84.728
GCA_903906765.1_freshwater_MAG_---_LaPlata-15m-a_bin-150_genomic	50-90% completeness AND/OR 5-10% contamination	Genbank	d__Bacteria;p__Chloroflexota;c__Anaerolineae;o__Anaerolineales;f__UBA4823;g__CAIQJJ01;s__CAIQJJ01 sp903872065	1547	5717480	0.211807	2.04	0	2.04	83.7	55	77.96
GCA_903912995.1_freshwater_MAG_---_LaPlata-15m-b_bin-018_genomic	50-90% completeness AND/OR 5-10% contamination	Genbank	d__Bacteria;p__Chloroflexota;c__Anaerolineae;o__Anaerolineales;f__UBA4823;g__CAIQJJ01;s__CAIQJJ01 sp903872065	1295	6574710	0.285792	2.19	0	2.19	91.22	75	87.976
GCA_020354045.1_ASM2035404v1_genomic	50-90% completeness AND/OR 5-10% contamination	Genbank	d__Bacteria;p__Chloroflexota;c__Anaerolineae;o__Anaerolineales;f__UBA4823;g__DSOS01;s__	1	3591530	0	1.72	0	1.72	86.65	85	86.32
GCA_015222395.1_ASM1522239v1_genomic	50-90% completeness AND/OR 5-10% contamination	Genbank	d__Bacteria;p__Chloroflexota;c__Anaerolineae;o__Anaerolineales;f__UBA4823;g__DSPF01;s__	517	2209330	0.605613	0	0	0	68.89	50	65.112
GCA_016649505.1_ASM1664950v1_genomic	50-90% completeness AND/OR 5-10% contamination	Genbank	d__Bacteria;p__Chloroflexota;c__Anaerolineae;o__Anaerolineales;f__UBA4823;g__DSPF01;s__	759	3202110	1.19734	1.72	0	1.72	84.48	45	76.584
GCA_020346705.1_ASM2034670v1_genomic	50-90% completeness AND/OR 5-10% contamination	Genbank	d__Bacteria;p__Chloroflexota;c__Anaerolineae;o__Anaerolineales;f__UBA4823;g__DSPF01;s__	1	3274080	0	0.86	0	0.86	72.65	75	73.12
GCA_020350745.1_ASM2035074v1_genomic	50-90% completeness AND/OR 5-10% contamination	Genbank	d__Bacteria;p__Chloroflexota;c__Anaerolineae;o__Anaerolineales;f__UBA4823;g__DSPF01;s__	1	3255580	0	0.94	50	0.47	70.14	80	72.112
GCA_011055775.1_ASM1105577v1_genomic	50-90% completeness AND/OR 5-10% contamination	Genbank	d__Bacteria;p__Chloroflexota;c__Anaerolineae;o__Anaerolineales;f__UBA4823;g__DSPF01;s__DSPF01 sp011055775	124	3252690	0.375382	0	0	0	88.87	85	88.096
GCA_001796835.1_ASM179683v1_genomic	50-90% completeness AND/OR 5-10% contamination	Genbank	d__Bacteria;p__Chloroflexota;c__Anaerolineae;o__Anaerolineales;f__UBA4823;g__DSWF01;s__	122	2164040	0	0	0	0	64.73	50	61.784
GCA_011368195.1_ASM1136819v1_genomic	50-90% completeness AND/OR 5-10% contamination	Genbank	d__Bacteria;p__Chloroflexota;c__Anaerolineae;o__Anaerolineales;f__UBA4823;g__DSWF01;s__DSWF01 sp011368195	27	3954970	7.0438	4.08	33.33	2.72014	98.28	100	98.624
GCA_001795085.1_ASM179508v1_genomic	50-90% completeness AND/OR 5-10% contamination	Genbank	d__Bacteria;p__Chloroflexota;c__Anaerolineae;o__Anaerolineales;f__UBA4823;g__FEB-25;s__	131	2040650	1.26038	0	0	0	58.62	35	53.896
GCA_001795285.1_ASM179528v1_genomic	50-90% completeness AND/OR 5-10% contamination	Genbank	d__Bacteria;p__Chloroflexota;c__Anaerolineae;o__Anaerolineales;f__UBA4823;g__FEB-25;s__	315	3230920	1.10216	5.17	33.33	3.44684	47.93	75	53.344
GCA_001796475.1_ASM179647v1_genomic	50-90% completeness AND/OR 5-10% contamination	Genbank	d__Bacteria;p__Chloroflexota;c__Anaerolineae;o__Anaerolineales;f__UBA4823;g__FEB-25;s__	195	2487960	0.438914	6.9	0	6.9	48.98	60	51.184
GCA_001797075.1_ASM179707v1_genomic	50-90% completeness AND/OR 5-10% contamination	Genbank	d__Bacteria;p__Chloroflexota;c__Anaerolineae;o__Anaerolineales;f__UBA4823;g__FEB-25;s__	188	2297290	0.924132	7.92	50	3.96	46.87	65	50.496
GCA_001797095.1_ASM179709v1_genomic	50-90% completeness AND/OR 5-10% contamination	Genbank	d__Bacteria;p__Chloroflexota;c__Anaerolineae;o__Anaerolineales;f__UBA4823;g__FEB-25;s__	214	2496610	0.755825	5.17	0	5.17	55.17	60	56.136
GCA_017884465.1_ASM1788446v1_genomic	50-90% completeness AND/OR 5-10% contamination	Genbank	d__Bacteria;p__Chloroflexota;c__Anaerolineae;o__Anaerolineales;f__UBA4823;g__FEB-25;s__	446	2364540	1.82573	12.93	27.27	9.40399	51.8	50	51.44
GCA_016929095.1_ASM1692909v1_genomic	50-90% completeness AND/OR 5-10% contamination	Genbank	d__Bacteria;p__Chloroflexota;c__Anaerolineae;o__Anaerolineales;f__UBA4823;g__JAAZNS01;s__	61	3909060	0.680982	1.72	0	1.72	86.05	85	85.84
3300020153_19	50-90% completeness AND/OR 5-10% contamination	Nayfach et al.	d__Bacteria;p__Chloroflexota;c__Anaerolineae;o__Anaerolineales;f__UBA4823;g__NAK19;s__	364	3240100	2.79374	0.31	0	0.31	80.88	85	81.704
3300027279_5	50-90% completeness AND/OR 5-10% contamination	Nayfach et al.	d__Bacteria;p__Chloroflexota;c__Anaerolineae;o__Anaerolineales;f__UBA4823;g__NAK19;s__	163	3162260	3.18949	0	0	0	86.05	100	88.84
GCA_003130835.1_ASM313083v1_genomic	50-90% completeness AND/OR 5-10% contamination	Genbank	d__Bacteria;p__Chloroflexota;c__Anaerolineae;o__Anaerolineales;f__UBA4823;g__NAK19;s__NAK19 sp003130835	158	3446610	7.02487	1.72	0	1.72	92.95	95	93.36
GCA_011051325.1_ASM1105132v1_genomic	50-90% completeness AND/OR 5-10% contamination	Genbank	d__Bacteria;p__Chloroflexota;c__Anaerolineae;o__Anaerolineales;f__UBA4823;g__NAK19;s__NAK19 sp003327455	445	2213490	1.27401	0.16	100	0	67.4	80	69.92
GCA_011329305.1_ASM1132930v1_genomic	50-90% completeness AND/OR 5-10% contamination	Genbank	d__Bacteria;p__Chloroflexota;c__Anaerolineae;o__Anaerolineales;f__UBA4823;g__NAK19;s__NAK19 sp003327455	7	2430890	0	1.72	0	1.72	49.84	70	53.872
167964	50-90% completeness AND/OR 5-10% contamination	PATRIC	d__Bacteria;p__Chloroflexota;c__Anaerolineae;o__Anaerolineales;f__UBA4823;g__RBG-16-57-11;s__	232	4.10094e+06	1.00611	1.72	0	1.72	87.77	95	89.216
2.07312e+06	50-90% completeness AND/OR 5-10% contamination	PATRIC	d__Bacteria;p__Chloroflexota;c__Anaerolineae;o__Anaerolineales;f__UBA4823;g__RBG-16-57-11;s__	64	3179590	1.14763	1.72	0	1.72	80.88	65	77.704
2.07312e+06	50-90% completeness AND/OR 5-10% contamination	PATRIC	d__Bacteria;p__Chloroflexota;c__Anaerolineae;o__Anaerolineales;f__UBA4823;g__RBG-16-57-11;s__	122	3929570	5.88563	0	0	0	55.17	85	61.136
GCA_001795165.1_ASM179516v1_genomic	50-90% completeness AND/OR 5-10% contamination	Genbank	d__Bacteria;p__Chloroflexota;c__Anaerolineae;o__Anaerolineales;f__UBA4823;g__RBG-16-57-11;s__RBG-16-57-11 sp001795165	172	4769170	2.63211	2.59	0	2.59	86.05	90	86.84
3300027863_94	50-90% completeness AND/OR 5-10% contamination	Nayfach et al.	d__Bacteria;p__Chloroflexota;c__Anaerolineae;o__Anaerolineales;f__UBA4823;g__UBA4823;s__	374	2237990	0.964705	0.86	100	0	75.08	75	75.064
GCA_002402275.1_ASM240227v1_genomic	50-90% completeness AND/OR 5-10% contamination	Genbank	d__Bacteria;p__Chloroflexota;c__Anaerolineae;o__Anaerolineales;f__UBA4823;g__UBA4823;s__UBA4823 sp002402275	265	2483460	0.820629	0	0	0	79.39	60	75.512
GCA_016932955.1_ASM1693295v1_genomic	50-90% completeness AND/OR 5-10% contamination	Genbank	d__Bacteria;p__Chloroflexota;c__Anaerolineae;o__Anaerolineales;f__UBA4823;g__UBA6092;s__	307	4545900	1.55613	1.72	0	1.72	87.93	90	88.344
2.07312e+06	50-90% completeness AND/OR 5-10% contamination	PATRIC	d__Bacteria;p__Chloroflexota;c__Anaerolineae;o__Anaerolineales;f__UBA4823;g__UTCFX2;s__	515	3219170	0.661661	3.45	50	1.725	90.02	75	87.016
GCA_002050125.1_ASM205012v1_genomic	50-90% completeness AND/OR 5-10% contamination	Genbank	d__Bacteria;p__Chloroflexota;c__Anaerolineae;o__Anaerolineales;f__UBA4823;g__UTCFX2;s__UTCFX2 sp002050125	111	2924760	3.51072	2.35	0	2.35	85.52	90	86.416
3300013130_18	50-90% completeness AND/OR 5-10% contamination	Nayfach et al.	d__Bacteria;p__Chloroflexota;c__Anaerolineae;o__Anaerolineales;f__UBA6092;g__FEB-25;s__	227	3547190	0.432173	0.34	100	0	77.43	85	78.944
3300027897_40	50-90% completeness AND/OR 5-10% contamination	Nayfach et al.	d__Bacteria;p__Chloroflexota;c__Anaerolineae;o__Anaerolineales;f__UBA6092;g__FEB-25;s__	192	2519300	3.71611	0	0	0	70.61	75	71.488
3300027819_71	50-90% completeness AND/OR 5-10% contamination	Nayfach et al.	d__Bacteria;p__Chloroflexota;c__Anaerolineae;o__Anaerolineales;f__UBA6663;g__;s__	390	1950860	0	0.86	100	0	66.79	60	65.432
3300027909_24	50-90% completeness AND/OR 5-10% contamination	Nayfach et al.	d__Bacteria;p__Chloroflexota;c__Anaerolineae;o__Anaerolineales;f__UBA6663;g__;s__	290	5575660	1.43266	0	0	0	86.21	95	87.968
GCA_001796945.1_ASM179694v1_genomic	50-90% completeness AND/OR 5-10% contamination	Genbank	d__Bacteria;p__Chloroflexota;c__Anaerolineae;o__Anaerolineales;f__UBA6663;g__;s__	236	3400270	3.01594	1.1	0	1.1	82.6	90	84.08
GCA_015660795.1_ASM1566079v1_genomic	50-90% completeness AND/OR 5-10% contamination	Genbank	d__Bacteria;p__Chloroflexota;c__Anaerolineae;o__Anaerolineales;f__UBA6663;g__;s__	722	4974700	1.11806	5.17	0	5.17	96.39	95	96.112
GCA_016189805.1_ASM1618980v1_genomic	50-90% completeness AND/OR 5-10% contamination	Genbank	d__Bacteria;p__Chloroflexota;c__Anaerolineae;o__Anaerolineales;f__UBA6663;g__;s__	368	1828360	0	1.88	50	0.94	60.19	55	59.152
GCA_016190515.1_ASM1619051v1_genomic	50-90% completeness AND/OR 5-10% contamination	Genbank	d__Bacteria;p__Chloroflexota;c__Anaerolineae;o__Anaerolineales;f__UBA6663;g__;s__	539	2188710	0.902815	0.86	100	0	76.49	35	68.192
GCA_016191655.1_ASM1619165v1_genomic	50-90% completeness AND/OR 5-10% contamination	Genbank	d__Bacteria;p__Chloroflexota;c__Anaerolineae;o__Anaerolineales;f__UBA6663;g__;s__	426	1463100	0	0	0	0	61.91	25	54.528
GCA_016195785.1_ASM1619578v1_genomic	50-90% completeness AND/OR 5-10% contamination	Genbank	d__Bacteria;p__Chloroflexota;c__Anaerolineae;o__Anaerolineales;f__UBA6663;g__;s__	622	3573230	0.858327	1.72	0	1.72	76.65	60	73.32
GCA_016200785.1_ASM1620078v1_genomic	50-90% completeness AND/OR 5-10% contamination	Genbank	d__Bacteria;p__Chloroflexota;c__Anaerolineae;o__Anaerolineales;f__UBA6663;g__;s__	637	4483600	1.2539	5.99	71.43	1.71134	89.66	80	87.728
GCA_016209165.1_ASM1620916v1_genomic	50-90% completeness AND/OR 5-10% contamination	Genbank	d__Bacteria;p__Chloroflexota;c__Anaerolineae;o__Anaerolineales;f__UBA6663;g__;s__	467	1921090	0	1.72	100	0	57.29	45	54.832
GCA_016210365.1_ASM1621036v1_genomic	50-90% completeness AND/OR 5-10% contamination	Genbank	d__Bacteria;p__Chloroflexota;c__Anaerolineae;o__Anaerolineales;f__UBA6663;g__;s__	459	2482490	1.30192	0.16	100	0	75	60	72
GCA_016213135.1_ASM1621313v1_genomic	50-90% completeness AND/OR 5-10% contamination	Genbank	d__Bacteria;p__Chloroflexota;c__Anaerolineae;o__Anaerolineales;f__UBA6663;g__;s__	147	3835040	0	0.69	50	0.345	82.76	75	81.208
GCA_016215035.1_ASM1621503v1_genomic	50-90% completeness AND/OR 5-10% contamination	Genbank	d__Bacteria;p__Chloroflexota;c__Anaerolineae;o__Anaerolineales;f__UBA6663;g__;s__	616	3270860	0	1.72	100	0	82.76	70	80.208
GCA_016215145.1_ASM1621514v1_genomic	50-90% completeness AND/OR 5-10% contamination	Genbank	d__Bacteria;p__Chloroflexota;c__Anaerolineae;o__Anaerolineales;f__UBA6663;g__;s__	481	3181520	0	1.72	100	0	89.66	80	87.728
GCA_016219365.1_ASM1621936v1_genomic	50-90% completeness AND/OR 5-10% contamination	Genbank	d__Bacteria;p__Chloroflexota;c__Anaerolineae;o__Anaerolineales;f__UBA6663;g__;s__	683	3102430	0	0.16	0	0.16	76.38	85	78.104
GCA_016235375.1_ASM1623537v1_genomic	50-90% completeness AND/OR 5-10% contamination	Genbank	d__Bacteria;p__Chloroflexota;c__Anaerolineae;o__Anaerolineales;f__UBA6663;g__;s__	613	2418720	0.460161	0	0	0	59.61	40	55.688
GCA_919901675.1_Hainich-H43-bin129-1_genomic	50-90% completeness AND/OR 5-10% contamination	Genbank	d__Bacteria;p__Chloroflexota;c__Anaerolineae;o__Anaerolineales;f__UBA6663;g__;s__	1289	2732390	0	8.49	28.57	6.06441	83.78	35	74.024
GCA_919901875.1_Hainich-H52-bin129-1_genomic	50-90% completeness AND/OR 5-10% contamination	Genbank	d__Bacteria;p__Chloroflexota;c__Anaerolineae;o__Anaerolineales;f__UBA6663;g__;s__	484	2626200	0	0	0	0	61.76	75	64.408
GCA_919901965.1_Hainich-H52-bin027-1_genomic	50-90% completeness AND/OR 5-10% contamination	Genbank	d__Bacteria;p__Chloroflexota;c__Anaerolineae;o__Anaerolineales;f__UBA6663;g__;s__	277	2.07968e+06	0	0	0	0	67.16	70	67.728
GCA_919902165.1_Hainich-H51-bin259_genomic	50-90% completeness AND/OR 5-10% contamination	Genbank	d__Bacteria;p__Chloroflexota;c__Anaerolineae;o__Anaerolineales;f__UBA6663;g__;s__	2198	3493830	0.842628	6.35	28.57	4.5358	55.14	50	54.112
GCA_919902595.1_Hainich-H51-bin210-1_genomic	50-90% completeness AND/OR 5-10% contamination	Genbank	d__Bacteria;p__Chloroflexota;c__Anaerolineae;o__Anaerolineales;f__UBA6663;g__;s__	1276	2727790	0.570059	5.17	33.33	3.44684	71.55	40	65.24
GCA_919902645.1_Hainich-H41-bin235-1_genomic	50-90% completeness AND/OR 5-10% contamination	Genbank	d__Bacteria;p__Chloroflexota;c__Anaerolineae;o__Anaerolineales;f__UBA6663;g__;s__	2196	4653590	0.417957	7.04	12.5	6.16	76.33	75	76.064
GCA_919902725.1_Hainich-H51-bin299-1_genomic	50-90% completeness AND/OR 5-10% contamination	Genbank	d__Bacteria;p__Chloroflexota;c__Anaerolineae;o__Anaerolineales;f__UBA6663;g__;s__	585	1245070	1.18708	0.57	100	0	58.39	30	52.712
GCA_919903005.1_Hainich-H51-bin323-1_genomic	50-90% completeness AND/OR 5-10% contamination	Genbank	d__Bacteria;p__Chloroflexota;c__Anaerolineae;o__Anaerolineales;f__UBA6663;g__;s__	868	3961640	0.0961723	0	0	0	83.62	65	79.896
GCA_016789165.1_ASM1678916v1_genomic	50-90% completeness AND/OR 5-10% contamination	Genbank	d__Bacteria;p__Chloroflexota;c__Anaerolineae;o__Anaerolineales;f__UBA6663;g__SpSt-583;s__	720	4119130	0	1.88	0	1.88	73.84	85	76.072
GCA_017999235.1_ASM1799923v1_genomic	50-90% completeness AND/OR 5-10% contamination	Genbank	d__Bacteria;p__Chloroflexota;c__Anaerolineae;o__Anaerolineales;f__UBA6663;g__SpSt-583;s__	803	4767700	0.720263	0	0	0	80.09	90	82.072
GCA_011367385.1_ASM1136738v1_genomic	50-90% completeness AND/OR 5-10% contamination	Genbank	d__Bacteria;p__Chloroflexota;c__Anaerolineae;o__Anaerolineales;f__UBA6663;g__SpSt-583;s__SpSt-583 sp011367385	216	4877270	2.36239	0	0	0	89.66	90	89.728
GCA_002455335.1_ASM245533v1_genomic	50-90% completeness AND/OR 5-10% contamination	Genbank	d__Bacteria;p__Chloroflexota;c__Anaerolineae;o__Anaerolineales;f__UBA6663;g__UBA6663;s__UBA6663 sp002455335	451	4785880	0	1.72	0	1.72	88.64	80	86.912
2.07312e+06	50-90% completeness AND/OR 5-10% contamination	PATRIC	d__Bacteria;p__Chloroflexota;c__Anaerolineae;o__Anaerolineales;f__UBA6668;g__;s__	604	4842440	0	0.34	0	0.34	83.57	75	81.856
2.07312e+06	50-90% completeness AND/OR 5-10% contamination	PATRIC	d__Bacteria;p__Chloroflexota;c__Anaerolineae;o__Anaerolineales;f__UBA6668;g__;s__	500	4671390	0	0	0	0	86.95	70	83.56
3300012533_38	50-90% completeness AND/OR 5-10% contamination	Nayfach et al.	d__Bacteria;p__Chloroflexota;c__Anaerolineae;o__Ardenticatenales;f__;g__;s__	137	3969090	0	0	0	0	83.62	100	86.896
2.61425e+06	50-90% completeness AND/OR 5-10% contamination	PATRIC	d__Bacteria;p__Chloroflexota;c__Anaerolineae;o__Ardenticatenales;f__Ardenticatenaceae;g__;s__	38	2013610	2.1896	0	0	0	66.14	80	68.912
GCA_013812995.1_ASM1381299v1_genomic	50-90% completeness AND/OR 5-10% contamination	Genbank	d__Bacteria;p__Chloroflexota;c__Anaerolineae;o__Ardenticatenales;f__Ardenticatenaceae;g__;s__	1069	5031310	0.21247	1.72	0	1.72	86.02	85	85.816
GCA_015492825.1_ASM1549282v1_genomic	50-90% completeness AND/OR 5-10% contamination	Genbank	d__Bacteria;p__Chloroflexota;c__Anaerolineae;o__Ardenticatenales;f__Ardenticatenaceae;g__;s__	382	3500350	0	0.16	100	0	84.48	95	86.584
GCA_003694685.1_ASM369468v1_genomic	50-90% completeness AND/OR 5-10% contamination	Genbank	d__Bacteria;p__Chloroflexota;c__Anaerolineae;o__Ardenticatenales;f__Ardenticatenaceae;g__Ardenticatena;s__Ardenticatena maritima	465	2605420	0.193443	0.16	100	0	73.9	85	76.12
GCA_013151955.1_ASM1315195v1_genomic	50-90% completeness AND/OR 5-10% contamination	Genbank	d__Bacteria;p__Chloroflexota;c__Anaerolineae;o__Ardenticatenales;f__JAADHH01;g__JAADHH01;s__JAADHH01 sp013151955	166	3019550	0	3.45	0	3.45	84.48	85	84.584
GCA_003695545.1_ASM369554v1_genomic	50-90% completeness AND/OR 5-10% contamination	Genbank	d__Bacteria;p__Chloroflexota;c__Anaerolineae;o__B4-G1;f__;g__;s__	1181	3922820	0	0.94	100	0	88.68	60	82.944
GCA_011374585.1_ASM1137458v1_genomic	50-90% completeness AND/OR 5-10% contamination	Genbank	d__Bacteria;p__Chloroflexota;c__Anaerolineae;o__B4-G1;f__;g__;s__	634	2319690	0.660002	6.9	0	6.9	56.43	70	59.144
GCA_015484715.1_ASM1548471v1_genomic	50-90% completeness AND/OR 5-10% contamination	Genbank	d__Bacteria;p__Chloroflexota;c__Anaerolineae;o__B4-G1;f__;g__;s__	588	2989380	1.72511	1.72	100	0	68.34	65	67.672
GCA_003647955.1_ASM364795v1_genomic	50-90% completeness AND/OR 5-10% contamination	Genbank	d__Bacteria;p__Chloroflexota;c__Anaerolineae;o__B4-G1;f__B4-G1;g__;s__	557	2316820	0.74844	3.89	0	3.89	62.03	70	63.624
GCA_004375865.1_ASM437586v1_genomic	50-90% completeness AND/OR 5-10% contamination	Genbank	d__Bacteria;p__Chloroflexota;c__Anaerolineae;o__B4-G1;f__B4-G1;g__;s__	608	2104540	0	3.45	0	3.45	68.51	60	66.808
GCA_011039825.1_ASM1103982v1_genomic	50-90% completeness AND/OR 5-10% contamination	Genbank	d__Bacteria;p__Chloroflexota;c__Anaerolineae;o__B4-G1;f__B4-G1;g__;s__	474	1962700	0	1.04	0	1.04	56.6	75	60.28
GCA_012514695.1_ASM1251469v1_genomic	50-90% completeness AND/OR 5-10% contamination	Genbank	d__Bacteria;p__Chloroflexota;c__Anaerolineae;o__B4-G1;f__B4-G1;g__;s__	851	4224630	0	2.79	0	2.79	87.36	75	84.888
GCA_015222415.1_ASM1522241v1_genomic	50-90% completeness AND/OR 5-10% contamination	Genbank	d__Bacteria;p__Chloroflexota;c__Anaerolineae;o__B4-G1;f__B4-G1;g__;s__	837	2727830	0	4.39	25	3.2925	81.11	50	74.888
GCA_018335215.1_ASM1833521v1_genomic	50-90% completeness AND/OR 5-10% contamination	Genbank	d__Bacteria;p__Chloroflexota;c__Anaerolineae;o__B4-G1;f__B4-G1;g__;s__	525	2414140	0	2.57	20	2.056	69.83	80	71.864
GCA_012962755.1_ASM1296275v1_genomic	50-90% completeness AND/OR 5-10% contamination	Genbank	d__Bacteria;p__Chloroflexota;c__Anaerolineae;o__B4-G1;f__B4-G1;g__B30-G15;s__	995	3010090	0.182387	2.04	33.33	1.36007	91.22	75	87.976
GCA_015222155.1_ASM1522215v1_genomic	50-90% completeness AND/OR 5-10% contamination	Genbank	d__Bacteria;p__Chloroflexota;c__Anaerolineae;o__B4-G1;f__B4-G1;g__B30-G15;s__	781	2588150	0	1.88	0	1.88	83.15	85	83.52
GCA_016783285.1_ASM1678328v1_genomic	50-90% completeness AND/OR 5-10% contamination	Genbank	d__Bacteria;p__Chloroflexota;c__Anaerolineae;o__B4-G1;f__B4-G1;g__B30-G15;s__	218	3865240	0	1.72	0	1.72	68.03	95	73.424
GCA_003647875.1_ASM364787v1_genomic	50-90% completeness AND/OR 5-10% contamination	Genbank	d__Bacteria;p__Chloroflexota;c__Anaerolineae;o__B4-G1;f__B4-G1;g__B30-G15;s__B30-G15 sp003648085	829	3972300	2.04894	5.17	0	5.17	89.66	100	91.728
GCA_003648085.1_ASM364808v1_genomic	50-90% completeness AND/OR 5-10% contamination	Genbank	d__Bacteria;p__Chloroflexota;c__Anaerolineae;o__B4-G1;f__B4-G1;g__B30-G15;s__B30-G15 sp003648085	559	3048690	0	3.45	100	0	89.34	80	87.472
GCA_018814485.1_ASM1881448v1_genomic	50-90% completeness AND/OR 5-10% contamination	Genbank	d__Bacteria;p__Chloroflexota;c__Anaerolineae;o__B4-G1;f__B4-G1;g__B4-G1;s__	776	3303720	0	5.33	25	3.9975	81.03	90	82.824
GCA_003648125.1_ASM364812v1_genomic	50-90% completeness AND/OR 5-10% contamination	Genbank	d__Bacteria;p__Chloroflexota;c__Anaerolineae;o__B4-G1;f__B4-G1;g__B4-G1;s__B4-G1 sp003648125	696	3434520	0.42102	6.03	16.67	5.0248	89.5	90	89.6
GCA_011046405.1_ASM1104640v1_genomic	50-90% completeness AND/OR 5-10% contamination	Genbank	d__Bacteria;p__Chloroflexota;c__Anaerolineae;o__B4-G1;f__B4-G1;g__DSAR01;s__DSAR01 sp011046405	585	4769480	0	1.36	0	1.36	87.07	90	87.656
GCA_003563035.1_ASM356303v1_genomic	50-90% completeness AND/OR 5-10% contamination	Genbank	d__Bacteria;p__Chloroflexota;c__Anaerolineae;o__B4-G1;f__B4-G1;g__SKLM01;s__	425	2602750	0	1.72	100	0	55.96	60	56.768
GCA_003563925.1_ASM356392v1_genomic	50-90% completeness AND/OR 5-10% contamination	Genbank	d__Bacteria;p__Chloroflexota;c__Anaerolineae;o__B4-G1;f__B4-G1;g__SKLM01;s__	415	3521480	0.508025	8.62	0	8.62	78.5	75	77.8
GCA_003566235.1_ASM356623v1_genomic	50-90% completeness AND/OR 5-10% contamination	Genbank	d__Bacteria;p__Chloroflexota;c__Anaerolineae;o__B4-G1;f__B4-G1;g__SKLM01;s__	467	1984380	2.40881	1.18	66.67	0.393294	48.24	65	51.592
GCA_007131025.1_ASM713102v1_genomic	50-90% completeness AND/OR 5-10% contamination	Genbank	d__Bacteria;p__Chloroflexota;c__Anaerolineae;o__B4-G1;f__B4-G1;g__SKLM01;s__	451	2151260	0	4.62	40	2.772	63.79	65	64.032
GCA_007125335.1_ASM712533v1_genomic	50-90% completeness AND/OR 5-10% contamination	Genbank	d__Bacteria;p__Chloroflexota;c__Anaerolineae;o__B4-G1;f__B4-G1;g__SKLM01;s__SKLM01 sp007118795	440	3178600	0.32939	2.59	100	0	82.6	95	85.08
GCA_003564075.1_ASM356407v1_genomic	50-90% completeness AND/OR 5-10% contamination	Genbank	d__Bacteria;p__Chloroflexota;c__Anaerolineae;o__B4-G1;f__B4-G1;g__SKLM01;s__SKLM01 sp007123205	511	3009620	0	0	0	0	78.29	75	77.632
GCA_011052755.1_ASM1105275v1_genomic	50-90% completeness AND/OR 5-10% contamination	Genbank	d__Bacteria;p__Chloroflexota;c__Anaerolineae;o__B4-G1;f__DUEL01;g__;s__	423	1893580	0	2.54	100	0	63.32	65	63.656
GCA_015662065.1_ASM1566206v1_genomic	50-90% completeness AND/OR 5-10% contamination	Genbank	d__Bacteria;p__Chloroflexota;c__Anaerolineae;o__B4-G1;f__DUEL01;g__;s__	426	2495610	0	7.76	0	7.76	91.38	80	89.104
GCA_012961965.1_ASM1296196v1_genomic	50-90% completeness AND/OR 5-10% contamination	Genbank	d__Bacteria;p__Chloroflexota;c__Anaerolineae;o__B4-G1;f__DUEL01;g__DUEL01;s__	620	2362740	0	3.45	0	3.45	80.17	60	76.136
GCA_015662115.1_ASM1566211v1_genomic	50-90% completeness AND/OR 5-10% contamination	Genbank	d__Bacteria;p__Chloroflexota;c__Anaerolineae;o__B4-G1;f__DUEL01;g__DUEL01;s__	374	1673000	0	1.02	0	1.02	74.97	65	72.976
GCA_011388675.1_ASM1138867v1_genomic	50-90% completeness AND/OR 5-10% contamination	Genbank	d__Bacteria;p__Chloroflexota;c__Anaerolineae;o__B4-G1;f__DUEL01;g__DUEL01;s__DUEL01 sp011388675	268	2625750	0	1.88	50	0.94	87.93	95	89.344
GCA_003694475.1_ASM369447v1_genomic	50-90% completeness AND/OR 5-10% contamination	Genbank	d__Bacteria;p__Chloroflexota;c__Anaerolineae;o__B4-G1;f__DUEL01;g__SpSt-77;s__	922	2273420	0	3.09	25	2.3175	80.33	55	75.264
GCA_017743275.1_ASM1774327v1_genomic	50-90% completeness AND/OR 5-10% contamination	Genbank	d__Bacteria;p__Chloroflexota;c__Anaerolineae;o__B4-G1;f__DUEL01;g__SpSt-77;s__	442	2261940	0	0	0	0	84.14	90	85.312
GCA_003650175.1_ASM365017v1_genomic	50-90% completeness AND/OR 5-10% contamination	Genbank	d__Bacteria;p__Chloroflexota;c__Anaerolineae;o__B4-G1;f__SLSP01;g__;s__	557	2357280	6.3586	3.76	50	1.88	68.97	70	69.176
GCA_004525435.1_ASM452543v1_genomic	50-90% completeness AND/OR 5-10% contamination	Genbank	d__Bacteria;p__Chloroflexota;c__Anaerolineae;o__B4-G1;f__SLSP01;g__;s__	724	2176510	0	0.78	0	0.78	49.84	55	50.872
GCA_011372155.1_ASM1137215v1_genomic	50-90% completeness AND/OR 5-10% contamination	Genbank	d__Bacteria;p__Chloroflexota;c__Anaerolineae;o__B4-G1;f__SLSP01;g__;s__	857	2935630	0	3.45	50	1.725	75.24	80	76.192
GCA_016927095.1_ASM1692709v1_genomic	50-90% completeness AND/OR 5-10% contamination	Genbank	d__Bacteria;p__Chloroflexota;c__Anaerolineae;o__B4-G1;f__SLSP01;g__;s__	783	5168240	0	1.72	100	0	87.93	75	85.344
GCA_016928755.1_ASM1692875v1_genomic	50-90% completeness AND/OR 5-10% contamination	Genbank	d__Bacteria;p__Chloroflexota;c__Anaerolineae;o__B4-G1;f__SLSP01;g__;s__	336	2753260	0	0.86	0	0.86	79.39	60	75.512
GCA_021159805.1_ASM2115980v1_genomic	50-90% completeness AND/OR 5-10% contamination	Genbank	d__Bacteria;p__Chloroflexota;c__Anaerolineae;o__B4-G1;f__SLSP01;g__;s__	633	3503950	0	3.45	0	3.45	83.62	85	83.896
GCA_021160125.1_ASM2116012v1_genomic	50-90% completeness AND/OR 5-10% contamination	Genbank	d__Bacteria;p__Chloroflexota;c__Anaerolineae;o__B4-G1;f__SLSP01;g__;s__	406	1921530	0	1.72	100	0	64.23	75	66.384
GCA_016934645.1_ASM1693464v1_genomic	50-90% completeness AND/OR 5-10% contamination	Genbank	d__Bacteria;p__Chloroflexota;c__Anaerolineae;o__B4-G1;f__SLSP01;g__DSWT01;s__	734	6816910	0	0	0	0	86.72	55	80.376
GCA_021107605.1_ASM2110760v1_genomic	50-90% completeness AND/OR 5-10% contamination	Genbank	d__Bacteria;p__Chloroflexota;c__Anaerolineae;o__B4-G1;f__SLSP01;g__G713;s__	356	2089920	0	0	0	0	76.49	70	75.192
GCA_011192175.1_ASM1119217v1_genomic	50-90% completeness AND/OR 5-10% contamination	Genbank	d__Bacteria;p__Chloroflexota;c__Anaerolineae;o__B4-G1;f__SLSP01;g__G713;s__G713 sp011192175	169	2404350	0	0	0	0	89.66	90	89.728
GCA_009908585.1_ASM990858v1_genomic	50-90% completeness AND/OR 5-10% contamination	Genbank	d__Bacteria;p__Chloroflexota;c__Anaerolineae;o__B4-G1;f__SLSP01;g__JAAAOZ01;s__JAAAOZ01 sp009908585	511	2672470	0	0	0	0	59.69	75	62.752
GCA_002068755.1_ASM206875v1_genomic	50-90% completeness AND/OR 5-10% contamination	Genbank	d__Bacteria;p__Chloroflexota;c__Anaerolineae;o__B4-G1;f__SLSP01;g__JAAZNO01;s__	1025	4290920	0	1.72	100	0	82.99	90	84.392
GCA_016926915.1_ASM1692691v1_genomic	50-90% completeness AND/OR 5-10% contamination	Genbank	d__Bacteria;p__Chloroflexota;c__Anaerolineae;o__B4-G1;f__SLSP01;g__JAAZNO01;s__	460	4295940	0	4.31	0	4.31	87.93	80	86.344
GCA_016931315.1_ASM1693131v1_genomic	50-90% completeness AND/OR 5-10% contamination	Genbank	d__Bacteria;p__Chloroflexota;c__Anaerolineae;o__B4-G1;f__SLSP01;g__JAAZNO01;s__	330	4347110	0	0	0	0	91.38	70	87.104
GCA_018055515.1_ASM1805551v1_genomic	50-90% completeness AND/OR 5-10% contamination	Genbank	d__Bacteria;p__Chloroflexota;c__Anaerolineae;o__B4-G1;f__SLSP01;g__JAAZNO01;s__	300	2696700	0	0	0	0	89.66	90	89.728
GCA_012798275.1_ASM1279827v1_genomic	50-90% completeness AND/OR 5-10% contamination	Genbank	d__Bacteria;p__Chloroflexota;c__Anaerolineae;o__B4-G1;f__SLSP01;g__JAAZNO01;s__JAAZNO01 sp012798275	724	3063300	0	0.86	100	0	87.77	65	83.216
GCA_014155685.1_ASM1415568v1_genomic	50-90% completeness AND/OR 5-10% contamination	Genbank	d__Bacteria;p__Chloroflexota;c__Anaerolineae;o__B4-G1;f__SLSP01;g__PWVB01;s__	314	2121240	1.89229	1.72	0	1.72	55.17	70	58.136
GCA_007133285.1_ASM713328v1_genomic	50-90% completeness AND/OR 5-10% contamination	Genbank	d__Bacteria;p__Chloroflexota;c__Anaerolineae;o__B4-G1;f__SLSP01;g__PWVB01;s__PWVB01 sp003562365	728	3952910	0.0786762	4.47	0	4.47	84.69	60	79.752
GCA_007119705.1_ASM711970v1_genomic	50-90% completeness AND/OR 5-10% contamination	Genbank	d__Bacteria;p__Chloroflexota;c__Anaerolineae;o__B4-G1;f__SLSP01;g__SLSP01;s__SLSP01 sp007130345	590	3346310	0	2.59	100	0	80.64	90	82.512
GCA_007124335.1_ASM712433v1_genomic	50-90% completeness AND/OR 5-10% contamination	Genbank	d__Bacteria;p__Chloroflexota;c__Anaerolineae;o__B4-G1;f__SLSP01;g__SLSP01;s__SLSP01 sp007130345	532	2648480	0.776294	1.72	0	1.72	62.77	85	67.216
3300028400_36	50-90% completeness AND/OR 5-10% contamination	Nayfach et al.	d__Bacteria;p__Chloroflexota;c__Anaerolineae;o__Caldilineales;f__;g__;s__	333	1581190	0	0.16	100	0	58.93	90	65.144
3300000980_6	50-90% completeness AND/OR 5-10% contamination	Nayfach et al.	d__Bacteria;p__Chloroflexota;c__Anaerolineae;o__Caldilineales;f__Caldilineaceae;g__;s__	729	5281550	0.589978	0	0	0	70.69	85	73.552
3300009083_60	50-90% completeness AND/OR 5-10% contamination	Nayfach et al.	d__Bacteria;p__Chloroflexota;c__Anaerolineae;o__Caldilineales;f__Caldilineaceae;g__;s__	764	4564140	0.343548	0	0	0	60.34	65	61.272
3300009084_27	50-90% completeness AND/OR 5-10% contamination	Nayfach et al.	d__Bacteria;p__Chloroflexota;c__Anaerolineae;o__Caldilineales;f__Caldilineaceae;g__;s__	1203	7259880	0.140085	2.59	0	2.59	85.91	85	85.728
3300009702_33	50-90% completeness AND/OR 5-10% contamination	Nayfach et al.	d__Bacteria;p__Chloroflexota;c__Anaerolineae;o__Caldilineales;f__Caldilineaceae;g__;s__	517	3724480	0.223387	1.72	100	0	78.53	90	80.824
3300027498_3	50-90% completeness AND/OR 5-10% contamination	Nayfach et al.	d__Bacteria;p__Chloroflexota;c__Anaerolineae;o__Caldilineales;f__Caldilineaceae;g__;s__	379	6273650	1.66841	1.72	0	1.72	89.5	80	87.6
3300027823_16	50-90% completeness AND/OR 5-10% contamination	Nayfach et al.	d__Bacteria;p__Chloroflexota;c__Anaerolineae;o__Caldilineales;f__Caldilineaceae;g__;s__	985	5733640	0.0978436	0	0	0	69.51	90	73.608
3300027823_31	50-90% completeness AND/OR 5-10% contamination	Nayfach et al.	d__Bacteria;p__Chloroflexota;c__Anaerolineae;o__Caldilineales;f__Caldilineaceae;g__;s__	761	3833220	0.213658	0	0	0	60.66	75	63.528
3300027850_14	50-90% completeness AND/OR 5-10% contamination	Nayfach et al.	d__Bacteria;p__Chloroflexota;c__Anaerolineae;o__Caldilineales;f__Caldilineaceae;g__;s__	958	6042220	0.20092	1.72	100	0	76.8	95	80.44
[truncated: 1,667 more rows]
