# Supplementary material for: Taxonomic Re-Classification and Expansion of the Phylum Chloroflexota Based on over 5000 Genomes and Metagenome-Assembled Genomes
Source: Microorganisms. 2023 Oct 23;11(10):2612. doi: 10.3390/microorganisms11102612 (PMC10608941; doi:10.3390/microorganisms11102612)
Supplement: Supplementary file 1 [file microorganisms-11-02612-s001.zip › Table_S2_Binning_groups.xlsx]

## Sheet: Overview
	Binning groups	Metagenomes in binning groups	Assembly groups	Total metagenomes in assembly groups
Bioreactors	34	79	24	59
Soil	39	100	24	60
Marine	25	63	18	34
Water	34	119	24	94
High salt	13	53	9	8
Corals + sponges	35	133	21	55
Hotsprings	104	258	86	258
Microbial mats	19	86	14	62
Lichens + mosses	4	28	3	28
Oral	19	208	19	208

## Sheet: Bioreactors
Bioreactors
Binning group	SRR accession of mapped metagenomes (Colors code the metagenomes used for the underlying assembly used for this binning group. In case two or more assemblies were merged, multiple colors are used)
R15	SRR7067999
R21	SRR554367
R24	SRR8165484
	SRR8165485
	SRR8165483
R29	SRR1050523
	SRR1050524
	SRR1050525
	SRR1050527
R30	SRR6201975
R31	SRR11032309
R41	SRR8925753
	SRR8925752
R42	SRR8925754
	SRR8925785
R43	SRR8925717
R44	SRR8925779
	SRR8925742
R45	SRR8925714
	SRR8925810
R46	SRR8925802
	SRR8925769
R47	SRR8925728
R48	SRR8925751
R69	SRR10276720
	SRR10276721
	SRR10276719
R71	ERR2019978
	ERR2019979
R72	SRR12718354
	SRR12718339
	SRR12718341
	SRR12718342
	SRR12718338
	SRR12718347
R73	SRR2062390
	SRR2062392
	SRR2062398
	SRR2062395
R77	SRR5007456
	SRR5007461
R89	ERR3173384
	ERR3173385
	ERR3173382
	ERR3173383
	ERR3173388
R94	SRR2043633
	SRR2043639
	SRR2043638
	SRR2043632
	SRR2043640
R95	SRR12348549
	SRR12348550
	SRR12348547
R115	SRR7067999
	SRR9129450
	SRR9129451
	SRR9827763
R117	SRR1050523
	SRR1050524
	SRR1050525
	SRR1050527
	SRR2062390
	SRR2062392
R118	ERR2019978
	ERR2019979
	ERR3173384
	ERR3173385
	ERR3173382
	ERR3173383
	ERR3173388
	SRR2043633
	SRR2043639
	SRR2043638
	SRR2043632
	SRR2043640
	ERR3173386
	DRR299358
	SRR5351549
	SRR2043637
	ERR2019982
R125	SRR8925779
	SRR8925742
	SRR8925728
R800	SRR8925717
	SRR8925760
R801	SRR8925753
	SRR8925752
	SRR8925750
R802	SRR8925751
	SRR8925749
R826	SRR5007456
	SRR5007461
	SRR4244066
	SRR5007144
R830	SRR12348549
	SRR12348550
	SRR12348547
	SRR12348548
R900	SRR12718342
	SRR12718338
	SRR12718347
	SRR12718354
	SRR12718339
	SRR12718341
	SRR12718346
	SRR12718351
	SRR12718348
	SRR12718355
	SRR12718350
	SRR12718340
R103	SRR6192633
	SRR6192634
	SRR6192632
	SRR6192635
R110	SRR9598598

## Sheet: Corals_sponges
Corals + sponges
Binning group	SRR accession of mapped metagenomes (Colors code the metagenomes used for the underlying assembly used for this binning group. In case two or more assemblies were merged, multiple colors are used)
S1	SRR7153373
	SRR7153380
	SRR7153379
	SRR7153383
	SRR7153377
	SRR7153382
	SRR7153378
	SRR7153374
	SRR7153375
	SRR7155204
	SRR7155206
	SRR7155205
S2	SRR10996932
	SRR10996933
	SRR10694907
	SRR10694902
	SRR10694903
	SRR10996905
	SRR10694905
	SRR10694904
	SRR10694908
	SRR10996904
S3	ERR5004221
	ERR5005008
	ERR5002191
	ERR5002192
	ERR5003471
	ERR5005007
	ERR5003468
	ERR5004218
	ERR5005005
	ERR5003469
	ERR5003470
	ERR5004220
	ERR5004246
	ERR5002189
	ERR5002190
S4	SRR10996932
	SRR10996933
	ERR5004221
	ERR5005008
	ERR5002191
	SRR10694907
	SRR10694902
	SRR10694903
	SRR10996905
	ERR5005007
	ERR5003468
	ERR5004218
	ERR5005005
	ERR5003469
S5	SRR13587046
	SRR13587048
	SRR13587047
S7	SRR13587051
	SRR13587050
	SRR13587052
	SRR13587057
S8	SRR13587051
	SRR13587046
	SRR13587055
	SRR13587049
	SRR13587053
	SRR13587056
S9	SRR9841444
S10	SRR9841446
S11	SRR7153373
	SRR7153380
	SRR7153379
	SRR7153383
S12	SRR8092709
	SRR8092710
	SRR8584780
	SRR8584775
	SRR8584778
	SRR8584779
	SRR8584806
	SRR8584774
	SRR8584807
	SRR8584781
	SRR8092756
	SRR6214543
S13	SRR10996932
	SRR10996933
S14	ERR5004221
	ERR5005008
	ERR5002191
	ERR5002192
	ERR5003471
S15	SRR7783611
	SRR7783612
	SRR7783613
	SRR7783616
	SRR7783615
	SRR7783614
S16	SRR3473501
S17	SRR8584796
	SRR8584786
S18	SRR3473501
	SRR8584796
	SRR8584786
	SRR8584792
	SRR8584795
	SRR8584794
	SRR8584793
	SRR8584797
	SRR8584787
S20	SRR3663854
S21	SRR2157455
	SRR6049383
S22	SRR12727663
S24	SRR10996926
	SRR10406097
	SRR10406136
	SRR10406104
	SRR10406098
	SRR10406134
	SRR10406105
	SRR10406099
	SRR10406100
	SRR10406103
	SRR10406102
	SRR10406101
	SRR10406137
	SRR10996925
	SRR10996927
S25	SRR10996928
S26	SRR9841446
	SRR10996928
	ERR5003472
	ERR5002196
	ERR5003473
	ERR5005034
	ERR5004223
	ERR5002197
	ERR5005036
	ERR5003475
	SRR10996931
	SRR9841441
	SRR9841442
	SRR9841435
	SRR9841436
	SRR9841427
	SRR9841434
	SRR9841438
	SRR9841429
	SRR9841428
	SRR9841437
S27	ERR5004222
	ERR5005009
	ERR5002193
	ERR5005010
	ERR5004247
	ERR5003474
	ERR5002194
	ERR5003476
	ERR5002195
S28	SRR10996926
S29	SRR10406097
	SRR10406136
	SRR10406104
	SRR10406098
	SRR10406134
	SRR10406105
	SRR10406099
	SRR10406100
	SRR10406103
	SRR10406102
	SRR10406101
	SRR10406137
S30	SRR7783611
	SRR7783612
	SRR7783613
S31	SRR7783616
	SRR7783615
	SRR7783614
S32	SRR13587051
	SRR13587050
S34	SRR13587046
S35	SRR7783609
	SRR7783610
	SRR7783607
	SRR7783608
	SRR7783621
	SRR7783622
S36	SRR8092709
	SRR8092710
S37	SRR8584780
	SRR8584775
S38	SRR8092709
	SRR8092710
	SRR8092555
	SRR8093131
S91	SRR8584780
	SRR8584775
	SRR8584778
	SRR8584779
	SRR8584806
	SRR8584774
	SRR8584807
	SRR8584781

## Sheet: High salt
High salt
Binning group	SRR accession of mapped metagenomes (Colors code the metagenomes used for the underlying assembly used for this binning group. In case two or more assemblies were merged, multiple colors are used)
N2	SRR9705745
	SRR9700529
	SRR8557270
N3	SRR9700624
	SRR9707468
	SRR9700625
N4	SRR9700687
	SRR9700688
N5	SRR8557365
	SRR8557364
N6	SRR8556427
	SRR8556254
N7	SRR8556703
	SRR8557033
N8	SRR8556600
	SRR8556769
	SRR8556772
N9	SRR8556697
	SRR8556606
	SRR8556704
	SRR8556701
N10	SRR6920733
	SRR6920734
	SRR6920735
	SRR6920732
	SRR6920729
	SRR6920731
	SRR6920728
	SRR6920730
N11	SRR8557270
	SRR9700529
	SRR9705745
	SRR9700624
	SRR9707468
	SRR9700625
	SRR9700687
	SRR9700688
	SRR8557365
	SRR8557364
	SRR9706179
	SRR9705733
	SRR9705674
	SRR9705735
	SRR9710542
	SRR9709000
	SRR9710038
	SRR9707467
	SRR9700623
	SRR9710522
	SRR9707989
N12	SRR8556254
	SRR8556427
	SRR8556703
	SRR8557033
	SRR8556600
	SRR8556769
	SRR8556772
	SRR8556606
	SRR8556697
	SRR8556701
	SRR8556704
	SRR8556609
	SRR8556611
	SRR8556696
	SRR9694931
	SRR9710561
	SRR9710702
	SRR8556771
	SRR8556705
	SRR8556706
	SRR8556428
	SRR8556479
	SRR8556601
	SRR8556602
N13	SRR9705745
	SRR9700529
	SRR8557270
	SRR9707468
	SRR9700625
	SRR9700624
	SRR9700688
	SRR9700687
	SRR8557364
	SRR8557365
	SRR8556254
	SRR8556427
	SRR8557033
	SRR8556703
	SRR8556769
	SRR8556772
	SRR8556600
	SRR8556704
	SRR8556701
	SRR8556697
	SRR8556606
	SRR9710702
	SRR8556602
	SRR9706179
	SRR9694931
	SRR9705733
	SRR9705674
	SRR9710561
	SRR9705735
N14	SRR9700624
	SRR9707468
	SRR9700625
	SRR8557364
	SRR8557365
	SRR8556254
	SRR8556427
	SRR8556697
	SRR8556606
	SRR8556704
	SRR8556701
	SRR9707467
	SRR8556479
	SRR9700623
	SRR8556706
	SRR9710522
	SRR8556428
	SRR9707989

## Sheet: Hotsprings
Hotsprings
Binning group	SRR accession of mapped metagenomes (Colors code the metagenomes used for the underlying assembly used for this binning group. In case two or more assemblies were merged, multiple colors are used)
H1	SRR10484996
H2	SRR11582164
	SRR11582165
	SRR11582168
	SRR11582169
H3	SRR6311220
	SRR6311221
	SRR6311224
H4	SRR5650826
H5	SRR2239652
H6	SRR5451356
	SRR5451357
	SRR5451355
H7	SRR1297185
	SRR1297204
H8	SRR11457942
	SRR11457943
	SRR14001913
H9	ERR1543536
H10	SRR5650808
H11	SRR8581213
	SRR8581214
	SRR12997672
H12	SRR12969846
	SRR7473443
	SRR7473445
	SRR7473442
	SRR7473444
H13	SRR12976788
	SRR10067287
	SRR10067286
H14	SRR12977061
	SRR5468566
	SRR5468567
	SRR5468565
	SRR5468568
H15	ERR1544599
	ERR1846294
	SRR12989705
	ERR1545491
	ERR1846295
H16	SRR12997673
	SRR7905022
	SRR7905025
	SRR7905024
	SRR7905023
H17	SRR9001935
H18	SRR4030105
	SRR5641139
	SRR4030111
	SRR4030107
H19	SRR5216255
	SRR5216258
H20	SRR5747860
	SRR5747841
	SRR5747861
H21	SRR10095374
	SRR10095362
	SRR10095344
	SRR10095342
	SRR10095340
	SRR10095373
	SRR10095351
	SRR10095343
	SRR10095341
H22	SRR13684274
	SRR13684273
	SRR13684272
H23	ERR975001
	SRR10519663
	SRR5216256
	SRR5216251
H24	SRR7067822
	SRR7067986
	SRR4027810
	SRR7067823
H25	SRR6049666
	SRR5248365
	SRR6208290
	SRR5248301
	SRR5248302
	SRR5248166
	SRR5248300
	SRR5248167
	SRR5248299
	SRR10420883
H26	SRR9649883
	SRR8863601
H27	SRR9650299
	SRR9649890
H28	SRR9650298
	SRR9650326
	SRR9650328
H29	SRR8863384
	SRR8863379
H30	SRR4030098
H31	SRR5247126
H32	SRR9649876
	SRR8863542
H33	SRR5248374
	SRR5248366
	SRR5248364
	SRR5248403
H34	SRR8863378
	SRR8863373
H35	SRR8863399
	SRR8863385
H36	SRR8863441
	SRR8863541
H37	SRR9649885
	SRR9649888
H38	SRR9650343
	SRR9650344
H39	SRR5581334
H40	DRR163690
	DRR163693
	DRR163691
	DRR163692
	DRR163688
	DRR163689
	DRR163686
	DRR163685
	DRR163687
H41	SRR7545549
	SRR7545550
	SRR12124856
	SRR12124855
	SRR12124857
H42	SRR3961734
	SRR3961733
	SRR3961739
H43	SRR3961743
	SRR3961742
	SRR3961740
H44	SRR6311223
	SRR6311222
H45	SRR5271190
H46	SRR7039829
	SRR7039830
H47	SRR4027954
	SRR3929057
	SRR4028098
H48	SRR5468531
	SRR5468563
	SRR5468518
H49	SRR5468562
	SRR5468564
H50	SRR5469038
	SRR5469039
H51	SRR11582163
	SRR11582162
	SRR11582161
H52	SRR5249478
	SRR5249264
	SRR5249513
H53	SRR7716004
H54	SRR11282941
	SRR11282945
	SRR11282950
	SRR11282938
	SRR11282936
	SRR11282937
	SRR11282940
	SRR11282942
	SRR11282946
	SRR11282949
	SRR11282951
	SRR11282935
	SRR11282939
	SRR11282948
	SRR11282947
	SRR11282944
H55	SRR11582174
	SRR11582140
	SRR11582139
H56	ERR2841092
	ERR2841091
	ERR2835737
	ERR2841090
	ERR2841089
	ERR2851113
	ERR2851114
	ERR2851139
	ERR2851138
	ERR2835736
	ERR2841088
H57	SRR11582172
	SRR11582171
H58	SRR11582156
H59	SRR11582149
	SRR11582150
H60	SRR11582173
	SRR11582159
	SRR11582142
	SRR11582160
H61	SRR5580900
	SRR5580899
	SRR5580903
	SRR5580901
	SRR5580902
H62	SRR11582143
	SRR11582153
	SRR11582154
	SRR11582144
H63	SRR11582170
H64	SRR11582167
H65	SRR11582141
	SRR11582166
	SRR11582155
H66	SRR11582158
	SRR11582157
H67	SRR11582152
	SRR11582151
H68	SRR11582148
	SRR11582146
	SRR11582147
	SRR11582145
H69	SRR5451033
	SRR5451032
	SRR5451031
H70	DRR082460
H71	SRR7903765
H72	SRR6344961
H73	SRR6344962
H74	SRR7903764
H75	SRR6986902
	SRR6986904
	SRR6986903
H76	SRR10063242
	SRR10063241
	SRR10063240
H77	SRR6261450
	SRR6943132
	SRR6261452
	SRR6943130
	SRR6943129
	SRR6261449
	SRR6943131
	SRR6261451
H78	SRR5214705
	SRR5214706
H79	SRR5214154
	SRR5214155
H80	SRR4030105
	SRR5641139
	SRR4030111
	SRR4030107
	SRR5216255
	SRR5216258
	SRR5747860
	SRR5747841
	SRR5747861
H81	SRR10095374
	SRR10095362
	SRR10095344
	SRR10095342
	SRR10095340
	SRR10095373
	SRR10095351
	SRR10095343
	SRR10095341
	ERR975001
	SRR5581334
	SRR5271190
	SRR5580900
	SRR5580899
	SRR5580903
	SRR5580901
	SRR5580902
H82	SRR11582165
	SRR11582169
	SRR11582162
	SRR11582161
	SRR11582156
	SRR11582142
	SRR11582160
	SRR11582154
	SRR11582144
	SRR11582167
	SRR11582158
	SRR11582157
	SRR11582147
	SRR11582145
H83	SRR9001935
	SRR2239652
	SRR11282941
	SRR11282945
	SRR11282950
	SRR11282938
	SRR11282936
	SRR11282937
	SRR11282940
	SRR11282942
	SRR11282946
	SRR11282949
	SRR11282951
	SRR11282935
	SRR11282939
	SRR11282948
	SRR11282947
	SRR11282944
	SRR6986902
	SRR6986904
	SRR6986903
	SRR6261450
	SRR6943132
	SRR6261452
	SRR6943130
	SRR6943129
	SRR6261449
	SRR6943131
	SRR6261451
H84	SRR8581213
	SRR8581214
	SRR12997672
	SRR12969846
	SRR7473443
	SRR7473445
	SRR7473442
	SRR7473444
	SRR10067287
	SRR12976788
	SRR10067286
	SRR12977061
	SRR5468566
	SRR5468567
	SRR5468565
	SRR5468568
	ERR1544599
	ERR1846294
	SRR12989705
	ERR1545491
	ERR1846295
	SRR12997673
	SRR5469038
	SRR5469039
	ERR1543536
H85	SRR10519663
	SRR5216256
	SRR5216251
	SRR5468562
	SRR5468564
H86	SRR3961734
	SRR3961733
	SRR3961739
	SRR3961743
	SRR3961742
	SRR3961740
H87	SRR7905022
	SRR7905025
	SRR7905024
	SRR7905023
	DRR163690
	DRR163693
	DRR163691
	DRR163692
	DRR163688
	DRR163689
	DRR163686
	DRR163685
	DRR163687
H88	SRR6311220
	SRR6311221
	SRR6311224
	SRR6311223
	SRR6311222
	SRR6344961
	SRR6344962
H89	SRR7903765
	SRR7903764
H94	SRR7067822
	SRR7067986
	SRR4027810
	SRR7067823
	SRR4027954
	SRR3929057
	SRR4028098
	SRR5468531
	SRR5468563
	SRR5468518
H100	SRR5650808
	SRR13684272
	SRR13684274
	SRR13684273
	SRR5650826
H101	SRR8581213
	SRR8581214
	SRR12997672
	SRR12969846
	SRR7473443
	SRR7473445
	SRR7473442
	SRR7473444
	SRR12976788
	SRR10067287
	SRR10067286
	SRR12977061
	SRR5468566
	SRR5468567
	SRR5468565
	SRR5468568
	ERR1544599
	ERR1846294
	SRR12989705
	ERR1545491
	ERR1846295
	SRR12997673
	SRR7905022
	SRR7905025
	SRR7905024
	SRR7905023
	SRR5248374
	SRR5248366
	SRR5248364
	SRR5248403
	SRR5451356
	SRR5451357
	SRR5451355
	ERR1543536
H102	SRR2239652
	SRR9001935
H103	SRR11582164
	SRR11582165
	SRR11582168
	SRR11582169
	SRR13684274
	SRR13684273
	SRR13684272
	SRR6311220
	SRR6311221
	SRR6311224
	SRR5248374
	SRR5248366
	SRR5248364
	SRR5248403
	SRR5451356
	SRR5451357
	SRR5451355
	SRR1297185
	SRR1297204
	SRR11457942
	SRR11457943
	SRR14001913
H104	SRR10484996
	SRR2239652
H105	SRR5650808
	SRR5248875
	SRR5248876
	SRR13684272
	SRR13684274
	SRR13684273
	SRR6049666
	SRR6208290
	SRR5248302
	SRR5248166
	SRR5248167
	SRR10420883
	SRR5248365
	SRR5248301
	SRR5248300
	SRR5248299
	SRR5451357
	SRR5451356
	SRR5451355
H106	SRR8863482
	SRR8863438
H107	SRR9649889
	SRR9649887
H109	SRR9650341
	SRR9650340
	SRR9650342
H110	SRR11582164
	SRR11582168
	SRR11582163
	SRR11582174
	SRR11582140
	SRR11582139
	SRR11582172
	SRR11582171
	SRR11582149
	SRR11582150
	SRR11582173
	SRR11582159
	SRR11582143
	SRR11582153
	SRR11582170
	SRR11582141
	SRR11582166
	SRR11582155
	SRR11582152
	SRR11582151
	SRR11582148
	SRR11582146
H111	SRR5248875
	SRR5248876
H112	SRR9649882
	SRR9649884
H113	SRR10848475
	SRR9650329
H114	SRR5249533
	SRR5249602

## Sheet: Lichens_mosses
Lichens + mosses
Binning group	SRR accession of mapped metagenomes (Colors code the metagenomes used for the underlying assembly used for this binning group. In case two or more assemblies were merged, multiple colors are used)
L1	ERR5002245
	ERR5005088
	ERR5002246
	ERR5003525
	ERR5002242
	ERR5003524
	ERR5005086
	ERR5004301
	ERR5003520
	ERR5002241
	ERR5004299
	ERR5004293
	ERR5005081
	ERR5002240
	ERR5004294
	ERR5005080
	ERR5003519
	ERR5005077
	ERR5004290
	ERR5002237
	ERR5003521
	ERR5003516
	SRR15568764
	ERR5002243
	ERR5002244
	SRR1531569
L2	ERR5003523
L3	ERR5003522
L4	ERR5002245
	ERR5005088
	ERR5002246
	ERR5003525
	ERR5002242
	ERR5003524
	ERR5005086
	ERR5004301
	ERR5003520
	ERR5002241
	ERR5004299
	ERR5004293
	ERR5005081
	ERR5002240
	ERR5004294
	ERR5005080
	ERR5003519
	ERR5005077
	ERR5004290
	ERR5002237
	ERR5003521
	ERR5003516
	SRR15568764
	ERR5002243
	ERR5002244
	SRR1531569
	ERR5003523
	ERR5003522

## Sheet: Marine
Marine
Binning group	SRR accession of mapped metagenomes (Colors code the metagenomes used for the underlying assembly used for this binning group. In case two or more assemblies were merged, multiple colors are used)
M1	SRR7066492
	SRR7066494
M4	SRR14537107
M6	SRR12347144
	SRR12347140
	SRR12347143
	SRR12347142
	SRR12347141
M7	SRR13892592
M8	SRR7066493
M9	SRR13892602
M11	SRR15734604
	SRR15734602
	SRR15734598
M14	SRR1971620
	SRR1971621
	SRR1971622
M22	SRR6208352
M28	SRR12059193
	SRR12059190
	SRR12059191
	SRR3109596
	SRR3109594
	SRR3109595
M30	SRR10836661
	SRR10836659
M32	SRR1627906
	SRR1627905
M35	SRR5248164
M37	SRR7067081
M39	SRR8403923
M42	SRR8452060
M43	SRR5248173
M46	SRR10836662
M48	SRR7066492
	SRR7066494
	SRR3109595
	SRR3109594
	SRR3109596
	SRR12059191
	SRR12059190
	SRR12059193
	SRR7067081
	SRR8403923
	SRR7066493
	SRR3109598
	SRR3089647
	SRR12686322
	SRR3109599
M50	SRR12347141
	SRR12347142
	SRR12347143
	SRR12347140
	SRR12347144
	SRR12347132
	SRR12347133
	SRR12347134
	SRR12347135
	SRR12347136
	SRR12347137
	SRR12347138
	SRR12347145
	SRR12347139
	SRR12347146
M51	SRR13892592
	SRR13892602
	SRR13892597
	SRR13892594
M52	SRR15734598
	SRR15734602
	SRR15734604
	SRR15734603
	SRR15734599
	SRR15734600
	SRR15734605
	SRR15734601
M54	SRR1971622
	SRR1971621
	SRR1971620
	SRR8452060
	SRR8482191
	SRR1971619
	SRR1971624
	SRR1971625
M58	SRR6208352
	SRR5248164
	SRR5248173
	SRR5248174
	SRR5248172
M62	SRR10836659
	SRR10836661
	SRR1627905
	SRR1627906
	SRR10836662
	SRR10836660
	SRR1627907

## Sheet: Microbial mats
Microbial mats
Binning group	SRR accession of mapped metagenomes (Colors code the metagenomes used for the underlying assembly used for this binning group. In case two or more assemblies were merged, multiple colors are used)
F1	SRR7428113
F2	SRR7769773
	SRR7769763
	SRR7769683
	SRR7769796
	SRR7769621
	SRR7769748
	SRR7769578
	SRR7769793
	SRR7769665
	SRR7769795
	SRR7769749
	SRR7769533
	SRR7769754
	SRR7769592
	SRR7769810
	SRR7769669
	SRR7769716
	SRR7769680
F3	DRR075734
F4	SRR15016858
	SRR931091
F5	SRR11607833
	SRR10915314
F6	SRR7428121
	SRR7428115
	SRR7428120
F7	SRR11308338
	SRR11308339
	SRR11308337
F8	SRR7428112
	SRR7428119
	SRR7428118
F9	SRR10915309
	SRR10915313
	SRR10915312
F10	SRR10915314
	SRR11607833
	SRR10915312
	SRR10915309
	SRR10915313
	SRR10915299
F11	SRR6448205
	SRR6448206
	SRR6448210
	SRR6448204
F13	SRR931751
	SRR931753
	SRR931752
	SRR931755
	SRR931756
	SRR931750
	SRR931708
	SRR931707
	SRR931706
	SRR931735
	SRR931740
	SRR931351
F14	ERR1924357
	ERR1878606
	ERR1878617
F15	SRR7428113
	SRR7428123
	SRR7428105
	SRR7428122
	SRR7428130
	SRR7428129
	SRR7428125
	SRR7428126
	SRR7428132
	SRR7428131
	SRR7428128
	SRR7428127
F16	SRR7428120
	SRR7428115
	SRR7428121
	SRR7428118
	SRR7428119
	SRR7428112
	SRR7428114
	SRR7428116
	SRR7428117
F17	ERR2437276
	ERR2437277
	ERR2407578
	ERR2407577
F18	SRR6448212
	SRR6448209
	SRR6448214
F19	SRR931351
	SRR931740
	SRR931735
	SRR931706
	SRR931707
	SRR931708
	SRR931750
	SRR931756
	SRR931755
	SRR931752
	SRR931753
	SRR931751
	SRR931091
	SRR15016858
	SRR930572
	SRR931068
	SRR931150
	SRR931044
	SRR931067
	SRR931294
	SRR931349
F20	SRR6448208
	SRR6448207

## Sheet: Oral
Oral
Binning group	SRR accession of mapped metagenomes (Colors code the metagenomes used for the underlying assembly used for this binning group. In case two or more assemblies were merged, multiple colors are used)
O1/O2A	ERR2900732
	ERR2900736
	ERR2900740
	ERR2900744
	ERR2900748
	ERR2900752
	ERR2900756
	ERR2900760
	ERR2900764
	ERR2900768
	ERR2900772
	ERR2900776
	ERR2900734
	ERR2900738
	ERR2900742
	ERR2900746
	ERR2900750
	ERR2900754
	ERR2900758
	ERR2900762
	ERR2900766
	ERR2900770
	ERR2900774
	ERR2900778
O1B/O2B	SRR6877284
	SRR6877286
	SRR6877285
	SRR6877287
	ERR3728242
	ERR3728243
	ERR3728244
	ERR3728245
	ERR3728246
	ERR3728247
	ERR3728248
	ERR3728249
	ERR3728250
	ERR3728251
	ERR3728252
	ERR3728253
	SRR12557006
	SRR12557007
	SRR12462930
	SRR12462931
	SRR12462932
	SRR12462933
	SRR12462934
	SRR12462935
	SRR12462936
	SRR12462937
	SRR12462945
	SRR12462946
	SRR12462947
O1C/O2C	SRR6877310
	SRR6877312
	SRR6877311
	SRR6877314
	SRR12462938
	SRR12462939
	SRR12462940
	SRR12462941
	SRR12462942
	SRR12462943
	SRR6877288
	SRR6877290
	SRR6877291
	SRR6877325
O1D/O2D	SRR6877326
	SRR6877393
	SRR6877327
	SRR6877391
	ERR3728238
	ERR3728239
	ERR3728240
	ERR3728241
	SRR7083204
	ERR1611378
	ERR1611379
	ERR1611380
	ERR1611381
	ERR1611382
	ERR1611383
	ERR1611384
	ERR1611385
	ERR1611386
	ERR1611387
	ERR1611388
	ERR1611390
	ERR1611391
	ERR1611392
	ERR1611393
	ERR1611394
	ERR1611395
	ERR1611396
	ERR1611397
	ERR1611398
	ERR1611399
	ERR1611400
	ERR1611402
	ERR1611403
	ERR1611404
	ERR1611405
	ERR1611406
	ERR1611407
	ERR1611408
	ERR1611409
	ERR1611410
	ERR1611411
	ERR1611412
	ERR1611413
	ERR1611415
	ERR1611416
	ERR1611417
	ERR1611419
	ERR1611420
	ERR1611422
	ERR1611423
	ERR3728225
	ERR3728226
	ERR3728227
	ERR3728228
	ERR3728254
	ERR3728255
	ERR3728256
	ERR3728257
	SRR6877296
	SRR6877300
	SRR6877305
	SRR6877313
	SRR6877316
	SRR6877318
	SRR6877322
	SRR6877328
	SRR6877330
	SRR6877332
	SRR6877338
	SRR6877339
	SRR6877340
	SRR6877342
	SRR6877344
	SRR6877346
	SRR6877348
	SRR6877350
	SRR6877358
	SRR6877361
	SRR6877367
	SRR6877369
	SRR6877370
	SRR6877374
	SRR6877376
	SRR6877384
	SRR6877388
	SRR6877397
	SRR6877399
	SRR6877401
	SRR6877403
	SRR6877293
	SRR6877295
	SRR6877297
	SRR6877299
	SRR6877301
	SRR6877309
	SRR6877315
	SRR6877319
	SRR6877321
	SRR6877329
	SRR6877341
	SRR6877343
	SRR6877347
	SRR6877349
	SRR6877351
	SRR6877353
	SRR6877359
	SRR6877360
	SRR6877366
	SRR6877375
	SRR6877377
	SRR6877380
	SRR6877383
	SRR6877385
	SRR6877389
	SRR6877394
	SRR6877396
	SRR6877398
	SRR6877400
	SRR6877402
O1E/O2E	SRR11176631
	SRR11176634
	SRR11176642
	SRR11176632
	SRR11176638
	SRR11176641
	SRR11176627
	SRR11176636
	SRR11176630
	SRR11176639
	SRR11176640
	SRR11176635
	SRR11176628
	SRR11176629
	SRR6877292
	SRR6877323
	SRR6877298
	SRR6877306
	SRR6877282
	SRR6877324
	SRR6877283
	SRR6877289
O12	SRR6877284
	SRR6877286
	SRR6877285
	SRR6877287
O2	ERR3728242
	ERR3728243
	ERR3728244
	ERR3728245
	ERR3728246
	ERR3728247
	ERR3728248
	ERR3728249
	ERR3728250
	ERR3728251
	ERR3728252
	ERR3728253
O6	SRR12557006
	SRR12557007
	SRR12462930
	SRR12462931
	SRR12462932
	SRR12462933
	SRR12462934
	SRR12462935
	SRR12462936
	SRR12462937
	SRR12462945
	SRR12462946
	SRR12462947
O14	SRR6877310
	SRR6877312
	SRR6877311
	SRR6877314
O3	SRR12462938
	SRR12462939
	SRR12462940
	SRR12462941
	SRR12462942
	SRR12462943
O4	SRR6877288
	SRR6877290
	SRR6877291
	SRR6877325
O10	SRR6877326
	SRR6877393
	SRR6877327
	SRR6877391
O11	ERR3728238
	ERR3728239
	ERR3728240
	ERR3728241
O13	SRR7083204
	ERR1611378
	ERR1611379
	ERR1611380
	ERR1611381
	ERR1611382
	ERR1611383
	ERR1611384
	ERR1611385
	ERR1611386
	ERR1611387
	ERR1611388
	ERR1611390
	ERR1611391
	ERR1611392
	ERR1611393
	ERR1611394
	ERR1611395
	ERR1611396
	ERR1611397
	ERR1611398
	ERR1611399
	ERR1611400
	ERR1611402
	ERR1611403
	ERR1611404
	ERR1611405
	ERR1611406
	ERR1611407
	ERR1611408
	ERR1611409
	ERR1611410
	ERR1611411
	ERR1611412
	ERR1611413
	ERR1611415
	ERR1611416
	ERR1611417
	ERR1611419
	ERR1611420
	ERR1611422
	ERR1611423
O15	ERR3728225
	ERR3728226
	ERR3728227
	ERR3728228
	ERR3728254
	ERR3728255
	ERR3728256
	ERR3728257
O5	SRR6877296
	SRR6877300
	SRR6877305
	SRR6877313
	SRR6877316
	SRR6877318
	SRR6877322
	SRR6877328
	SRR6877330
	SRR6877332
	SRR6877338
	SRR6877339
	SRR6877340
	SRR6877342
	SRR6877344
	SRR6877346
	SRR6877348
	SRR6877350
	SRR6877358
	SRR6877361
	SRR6877367
	SRR6877369
	SRR6877370
	SRR6877374
	SRR6877376
	SRR6877384
	SRR6877388
	SRR6877397
	SRR6877399
	SRR6877401
	SRR6877403
	SRR6877293
	SRR6877295
	SRR6877297
	SRR6877299
	SRR6877301
	SRR6877309
	SRR6877315
	SRR6877319
	SRR6877321
	SRR6877329
	SRR6877341
	SRR6877343
	SRR6877347
	SRR6877349
	SRR6877351
	SRR6877353
	SRR6877359
	SRR6877360
	SRR6877366
	SRR6877375
	SRR6877377
	SRR6877380
	SRR6877383
	SRR6877385
	SRR6877389
	SRR6877394
	SRR6877396
	SRR6877398
	SRR6877400
	SRR6877402
O7	SRR11176631
	SRR11176634
	SRR11176642
	SRR11176632
	SRR11176638
	SRR11176641
	SRR11176627
	SRR11176636
	SRR11176630
	SRR11176639
	SRR11176640
	SRR11176635
	SRR11176628
	SRR11176629
O8	SRR6877292
	SRR6877323
	SRR6877298
	SRR6877306
O9	SRR6877282
	SRR6877324
	SRR6877283
	SRR6877289

## Sheet: Soil
Soil
Binning group	SRR accession of mapped metagenomes (Colors code the metagenomes used for the underlying assembly used for this binning group. In case two or more assemblies were merged, multiple colors are used)
B3	ERR5003677
	ERR5001841
	ERR5003120
	ERR5003696
	ERR5003121
	ERR5004483
	ERR5001842
B4	SRR5915970
B5	SRR5919096
B6	SRR5919157
	SRR5919156
B7	SRR5919158
B8	SRR5919238
B9	SRR5919344
B10	SRR5919075
B11	SRR6266699
	SRR6266700
	SRR6266566
B14	SRR9691030
B20	SRR6201872
	SRR3983532
	SRR6201870
B22	SRR7897066
B23	SRR7897067
B24	SRR7897070
B30	SRR10360627
	SRR10360628
B31	SRR10360614
	SRR10360613
B32	SRR13115019
B38	SRR11271801
	SRR11271806
	SRR11271805
B39	SRR1531574
B40	SRR3614072
B43	SRR6266699
B51	SRR15603315
B52	SRR15603314
B57	SRR14569947
	SRR14569948
B61	SRR12347817
	SRR12347820
	SRR12347816
B67	ERR947521
	ERR947520
B68	SRR3608537
	SRR3608538
	SRR3608536
	SRR3608539
	SRR3608534
	SRR3608535
	SRR3608532
B73	ERR5003677
	ERR5001841
	ERR5003120
	ERR5003696
	ERR5003121
	ERR5004483
	ERR5001842
	ERR5001834
	ERR5003113
	ERR5001830
	ERR5004479
	ERR5003109
	ERR5001838
	ERR5001827
	ERR5003117
	ERR5003106
	ERR5004464
B74	SRR5919075
	SRR5915970
	SRR5919096
	SRR5919157
	SRR5919156
	SRR5919158
	SRR5919238
	SRR5919344
	SRR5919263
	SRR5919210
	SRR5919232
	SRR5919248
	SRR5919057
	SRR5916257
B77	SRR9691030
	SRR9691020
	SRR9691043
B83	SRR6201872
	SRR3983532
	SRR6201870
	SRR6201800
	SRR3983530
	SRR3982488
B85	SRR7897066
	SRR7897067
	SRR7897070
	SRR7897068
	SRR7897071
B88	SRR10360627
	SRR10360628
	SRR10360614
	SRR10360613
	SRR10360621
	SRR10360607
	SRR10360608
B89	SRR13115019
	SRR13115018
B93	SRR11271801
	SRR11271806
	SRR11271805
	SRR11271808
	SRR11271807
B94	SRR1531574
	SRR3614072
B104	SRR15603315
	SRR15603314
	SRR15603313
B107	SRR14569947
	SRR14569948
	SRR14569890
	SRR14569931
	SRR14569934
	SRR14569887
B111	SRR12347817
	SRR12347820
	SRR12347816
	SRR12347823
	SRR12347812
	SRR12347815
	SRR12347821
	SRR7042378
	SRR7042375
	SRR7042351
	SRR7042391
	SRR7777794
	SRR7777789
	SRR7777787
	SRR7777793
	SRR7777788
	SRR7777796
	SRR7777799

[truncated: 1 more sheets: Water]
