# Supplementary material for: Taxonomic Re-Classification and Expansion of the Phylum Chloroflexota Based on over 5000 Genomes and Metagenome-Assembled Genomes
Source: Microorganisms. 2023 Oct 23;11(10):2612. doi: 10.3390/microorganisms11102612 (PMC10608941; doi:10.3390/microorganisms11102612)
Supplement: Supplementary file 1 [file microorganisms-11-02612-s001.zip › Table_S3_Markergenes.xlsx]

## Sheet: marker genes
Profile HMM ID	Description	Length (bp)	used in Terrabacteria phylogeny	used in Chloroflexota phylogeny
PF00281	Ribosomal protein L6	57	no	yes
PF00380	Ribosomal protein S9	121	yes	yes
PF00410	Ribosomal protein S8	126	no	yes
PF00466	Ribosomal protein L11	100	no	yes
PF01025	GrpE	166	no	yes
PF02576	RimP N-terminal domain	73	no	no
PF03726	Polyribonucleotide nucleotidyltransferase, RNA binding domain	83	no	no
TIGR00006	16S rRNA (cytosine(1402)-N(4))-methyltransferase	310	no	yes
TIGR00019	Peptide chain release factor 1	361	no	no
TIGR00020	Peptide chain release factor 2	365	no	no
TIGR00029	Ribosomal protein bS20	87	yes	no
TIGR00043	rRNA maturation RNase YbeY	111	no	no
TIGR00054	RIP metalloprotease RseP	421	no	no
TIGR00059	Ribosomal protein L17	112	no	yes
TIGR00060	Ribosomal protein bL18	114	no	yes
TIGR00061	Ribosomal protein bL21	101	no	no
TIGR00064	Signal recognition particle-docking protein FtsY	279	no	no
TIGR00065	Cell division protein FtsZ	353	no	yes
TIGR00082	Ribosome-binding factor A	115	no	yes
TIGR00083	Riboflavin biosynthesis protein RibF	290	no	no
TIGR00084	Holliday junction DNA helicase RuvA	192	no	no
TIGR00086	SsrA-binding protein	144	yes	no
TIGR00088	tRNA (guanine(37)-N(1))-methyltransferase	233	yes	yes
TIGR00090	Ribosome silencing factor rsfS_iojap_ybeB	99	no	no
TIGR00092	GTP-binding protein YchF	368	yes	no
TIGR00095	16S rRNA (guanine(966)-N(2))-methyltransferase RsmD	194	no	no
TIGR00115	Trigger factor tig	410	no	no
TIGR00116	Translation elongation factor Ts	293	no	yes
TIGR00138	16S rRNA (guanine(527)-N(7))-methyltransferase RsmG	183	no	no
TIGR00158	Ribosomal protein bL9	148	no	yes
TIGR00166	Ribosomal protein bS6	95	yes	yes
TIGR00167	Ribosomal protein L14	290	no	no
TIGR00168	Translation initiation factor IF-3	165	no	yes
TIGR00186	RNA methyltransferase, TrmH family, group 3	240	no	no
TIGR00194	Excinuclease ABC subunit C	574	no	yes
TIGR00250	Putative transcription antitermination factor YqgF	130	no	no
TIGR00337	CTP synthase PyrG	526	no	no
TIGR00344	Alanine--tRNA ligase	847	no	no
TIGR00362	Chromosomal replication initiator protein DnaA	437	no	no
TIGR00382	ATP-dependent Clp protease, ATP-binding subunit ClpX	414	no	no
TIGR00392	Isoleucine--tRNA ligase	861	no	no
TIGR00396	Leucine--tRNA ligase	843	no	yes
TIGR00398	Methionine--tRNA ligase	530	no	no
TIGR00414	Serine--tRNA ligase	418	no	no
TIGR00416	DNA repair protein RadA	454	no	no
TIGR00420	tRNA (5-methylaminomethyl-2-thiouridylate)-methyltransferase	351	no	no
TIGR00422	Valine--tRNA ligase	863	no	no
TIGR00431	tRNA pseudouridine(55) synthase	210	no	yes
TIGR00435	Cysteine--tRNA ligase	466	no	no
TIGR00436	GTP-binding protein Era	270	no	yes
TIGR00442	Histidine--tRNA ligase	406	yes	no
TIGR00445	Phospho-N-acetylmuramoyl-pentapeptide-transferase	321	no	no
TIGR00456	Arginine--tRNA ligase	569	no	no
TIGR00459	Aspartate--tRNA ligase	586	no	no
TIGR00460	Methionyl-tRNA formyltransferase	315	no	no
TIGR00468	Phenylalanine--tRNA ligase, alpha subunit	324	yes	no
TIGR00472	Phenylalanine--tRNA ligase, beta subunit	798	yes	yes
TIGR00487	Translation initiation factor IF-2	587	no	yes
TIGR00496	Ribosome recycling factor	176	yes	yes
TIGR00539	Putative oxygen-independent coproporphyrinogen III oxidase	361	no	no
TIGR00580	Transcription-repair coupling factor	923	no	no
TIGR00593	DNA polymerase I	890	no	no
TIGR00615	Recombination protein RecR	196	no	no
TIGR00631	Excinuclease ABC subunit B	658	no	no
TIGR00634	DNA repair protein RecN	563	no	no
TIGR00635	Holliday junction DNA helicase RuvB	305	no	no
TIGR00643	ATP-dependent DNA helicase RecG	629	no	no
TIGR00663	DNA polymerase III, beta subunit	367	no	no
TIGR00717	Ribosomal protein bS1	516	no	no
TIGR00755	Ribosomal RNA small subunit methyltransferase A	256	no	no
TIGR00810	Preprotein translocase, SecG subunit	73	yes	yes
TIGR00922	Transcription termination/antitermination factor NusG	172	no	yes
TIGR00928	Adenylosuccinate lyase	436	no	no
TIGR00952	Ribosomal protein S15	86	yes	yes
TIGR00959	Signal recognition particle protein	428	no	no
TIGR00963	Preprotein translocase, SecA subunit	787	no	no
TIGR00964	Preprotein translocase, SecE subunit	57	no	no
TIGR00967	Preprotein translocase, SecY subunit	414	no	no
TIGR00981	Ribosomal protein S12	124	no	no
TIGR01009	Ribosomal protein uS3	212	no	yes
TIGR01011	Ribosomal protein uS2	225	no	yes
TIGR01017	Ribosomal protein uS4	200	no	yes
TIGR01021	Ribosomal protein uS5	156	no	yes
TIGR01029	Ribosomal protein uS7	154	no	no
TIGR01032	Ribosomal protein bL20	114	no	yes
TIGR01039	ATP synthase F1, beta subunit	462	no	no
TIGR01044	Ribosomal protein uL22	103	no	yes
TIGR01050	Ribosomal protein S19	92	no	yes
TIGR01059	DNA gyrase, B subunit	639	no	no
TIGR01063	DNA gyrase, A subunit	800	no	no
TIGR01066	Ribosomal protein uL13	141	yes	yes
TIGR01071	Ribosomal protein uL15	144	no	yes
TIGR01079	Ribosomal protein uL24	104	no	yes
TIGR01082	UDP-N-acetylmuramate--L-alanine ligase	449	no	no
TIGR01087	UDP-N-acetylmuramoylalanine--D-glutamate ligase	441	no	no
TIGR01128	DNA polymerase III, delta subunit	314	no	no
TIGR01146	ATP synthase F1, gamma subunit	286	no	no
TIGR01164	Ribosomal protein uL16	126	no	yes
TIGR01169	Ribosomal protein uL1	227	no	yes
TIGR01171	Ribosomal protein uL2	275	no	yes
TIGR01302	Inosine-5'-monophosphate dehydrogenase	450	no	no
TIGR01391	DNA primase	414	yes	no
TIGR01393	Elongation factor 4	595	no	no
TIGR01394	GTP-binding protein TypA/BipA	594	no	no
TIGR01510	Pantetheine-phosphate adenylyltransferase	155	no	yes
TIGR01632	Ribosomal protein uL11	140	yes	yes
TIGR01951	Transcription antitermination factor NusB	131	no	no
TIGR01953	Transcription termination factor NusA	340	yes	yes
TIGR02012	Protein RecA	321	no	no
TIGR02013	DNA-directed RNA polymerase, beta subunit	1238	yes	yes
TIGR02027	DNA-directed RNA polymerase, alpha subunit	298	no	yes
TIGR02075	UMP kinase	233	no	no
TIGR02191	Ribonuclease III	219	no	no
TIGR02273	16S rRNA processing protein RimM	166	no	no
TIGR02350	Chaperone protein DnaK	596	no	no
TIGR02386	DNA-directed RNA polymerase, beta' subunit	1147	yes (if applicable)	yes
TIGR02387	DNA-directed RNA polymerase subunit gamma, Cyanobacteria	619	yes (if applicable)	no
TIGR02388	DNA-directed RNA polymerase subunit beta'', Cyanobacteria	1230	yes (if applicable)	no
TIGR02397	DNA polymerase III, subunit gamma and tau	355	no	no
TIGR02432	tRNA(Ile)-lysidine synthetase	189	no	no
TIGR02729	Obg family GTPase CgtA	329	no	no
TIGR03263	Guanylate kinase	180	no	no
TIGR03594	Ribosome-associated GTPase EngA	432	no	no
TIGR03625	Ribosomal protein uL3	202	no	yes
TIGR03631	Ribosomal protein S13	113	no	yes
TIGR03632	Ribosomal protein uS11	117	no	yes
TIGR03635	Ribosomal protein S17	72	no	yes
TIGR03654	Ribosomal protein uL6	175	no	yes
TIGR03723	tRNA threonylcarbamoyl adenosine modification protein TsaD	314	yes	no
TIGR03725	tRNA threonylcarbamoyl adenosine modification protein YeaZ	212	no	no
TIGR03953	Ribosomal protein uL4	188	no	yes
