# Supplementary material for: Taxonomic Re-Classification and Expansion of the Phylum Chloroflexota Based on over 5000 Genomes and Metagenome-Assembled Genomes
Source: Microorganisms. 2023 Oct 23;11(10):2612. doi: 10.3390/microorganisms11102612 (PMC10608941; doi:10.3390/microorganisms11102612)
Supplement: Supplementary file 1 [file microorganisms-11-02612-s001.zip › Table_S4_Species_clusters.xlsx]

## Sheet: medium quality
cluster	best genome of cluster	origin of best genome	total count of genomes in cluster	public genomes in cluster	MAGs from binning approach in cluster (MAGsSRA)	MAGs from environmental sample in cluster (MAGsSample)	new cluster?	tax__p	tax__c	tax__o	tax__f	tax__g	tax__s
442_2	61435.1	public genome	3	3	0	0	nothing_new_here	p__Chloroflexota	c__Dehalococcoidia	o__Dehalococcoidales	f__Dehalococcoidaceae	g__Dehalococcoides	s__Dehalococcoides mccartyi_A
2180_2	71864.6	public genome	1	1	0	0	nothing_new_here	p__Chloroflexota	c__Anaerolineae	o__Anaerolineales	f__EnvOPS12	g__OLB14	s__
2222_2	71864.7	public genome	1	1	0	0	nothing_new_here	p__Chloroflexota	c__Anaerolineae	o__Anaerolineales	f__EnvOPS12	g__UBA877	s__
252_3	166587	public genome	1	1	0	0	nothing_new_here	p__Chloroflexota	c__Anaerolineae	o__Anaerolineales	f__Anaerolineaceae	g__Flexilinea	s__Flexilinea sp902774215
1391_1	166587	public genome	3	3	0	0	nothing_new_here	p__Chloroflexota	c__Ellin6529	o__CSP1-4	f__CSP1-4	g__CAIYQJ01	s__CAIYQJ01 sp903928275
440_0	166587	public genome	1	1	0	0	nothing_new_here	p__Chloroflexota	c__Dehalococcoidia	o__SAR202	f__VXLM01	g__	s__
2124_1	167964	public genome	1	1	0	0	nothing_new_here	p__Chloroflexota	c__Anaerolineae	o__Anaerolineales	f__DRKV01	g__DRKV01	s__
350_1	167964	public genome	3	3	0	0	nothing_new_here	p__Chloroflexota	c__Anaerolineae	o__Anaerolineales	f__Anaerolineaceae	g__Bellilinea	s__Bellilinea sp003448875
2149_2	167964	public genome	2	1	1	0	old+new_onlyMAGsSRA	p__Chloroflexota	c__Anaerolineae	o__Anaerolineales	f__Anaerolineaceae	g__Anaerolinea	s__
2179_1	167965	public genome	2	2	0	0	nothing_new_here	p__Chloroflexota	c__Anaerolineae	o__Anaerolineales	f__EnvOPS12	g__OLB14	s__
2238_1	167965	public genome	1	1	0	0	nothing_new_here	p__Chloroflexota	c__Anaerolineae	o__Anaerolineales	f__EnvOPS12	g__UBA5796	s__
2233_3	167965	public genome	1	1	0	0	nothing_new_here	p__Chloroflexota	c__Anaerolineae	o__Anaerolineales	f__EnvOPS12	g__	s__
2172_2	167965	public genome	1	1	0	0	nothing_new_here	p__Chloroflexota	c__Anaerolineae	o__Anaerolineales	f__EnvOPS12	g__UBA7227	s__
728_1	363277	public genome	4	4	0	0	nothing_new_here	p__Chloroflexota	c__DTOL01	o__DTOL01	f__	g__	s__
2222_3	444458	public genome	1	1	0	0	nothing_new_here	p__Chloroflexota	c__Anaerolineae	o__Anaerolineales	f__EnvOPS12	g__UBA877	s__UBA877 sp903873975
2095_1	452435	public genome	2	1	1	0	old+new_onlyMAGsSRA	p__Chloroflexota	c__Anaerolineae	o__Anaerolineales	f__EnvOPS12	g__UBA5195	s__UBA5195 sp903838415
1566_2	480224	public genome	7	2	4	1	mostly_new_MAGsSRA+Sample	p__Chloroflexota	c__Chloroflexia	o__Chloroflexales	f__Chloroflexaceae	g__Chloroflexus	s__Chloroflexus aurantiacus
18_5	732234	public genome	2	1	0	1	old+new_MAGsSRA+Sample	p__Chloroflexota	c__Ktedonobacteria	o__Ktedonobacterales	f__Ktedonobacteraceae	g__Thermogemmatispora	s__Thermogemmatispora onikobensis
1110_1	1.8398e+06	public genome	1	1	0	0	nothing_new_here	p__Chloroflexota	c__Dehalococcoidia	o__Dehalococcoidales	f__Dehalococcoidaceae	g__Dehalogenimonas	s__Dehalogenimonas formicexedens
2206_1	1.87252e+06	public genome	3	1	2	0	old+new_onlyMAGsSRA	p__Chloroflexota	c__Anaerolineae	o__Anaerolineales	f__EnvOPS12	g__OLB14	s__
2264_0	1.87252e+06	public genome	1	1	0	0	nothing_new_here	p__Chloroflexota	c__Anaerolineae	o__Anaerolineales	f__EnvOPS12	g__UBA8950	s__
2254_0	1.87252e+06	public genome	1	1	0	0	nothing_new_here	p__Chloroflexota	c__Anaerolineae	o__Anaerolineales	f__EnvOPS12	g__UBA5195	s__
1148_0	1.87252e+06	public genome	1	1	0	0	nothing_new_here	p__Chloroflexota	c__Anaerolineae	o__UBA4142	f__UBA4142	g__	s__
169_0	1.87252e+06	public genome	1	1	0	0	nothing_new_here	p__Chloroflexota	c__Anaerolineae	o__Anaerolineales	f__UBA4823	g__UBA4823	s__
2168_2	1.87252e+06	public genome	4	1	3	0	mostly_new_onlyMAGsSRA	p__Chloroflexota	c__Anaerolineae	o__Anaerolineales	f__EnvOPS12	g__UBA12294	s__
1882_2	1.87252e+06	public genome	1	1	0	0	nothing_new_here	p__Chloroflexota	c__Anaerolineae	o__SBR1031	f__UBA2029	g__	s__
1696_2	1.87252e+06	public genome	1	1	0	0	nothing_new_here	p__Chloroflexota	c__Anaerolineae	o__SpSt-313	f__SpSt-313	g__SpSt-313	s__
1769_1	1.87252e+06	public genome	1	1	0	0	nothing_new_here	p__Chloroflexota	c__Anaerolineae	o__Anaerolineales	f__Anaerolineaceae	g__Ch132	s__
2513_1	1.88981e+06	public genome	12	2	10	0	mostly_new_onlyMAGsSRA	p__Chloroflexota	c__Anaerolineae	o__Anaerolineales	f__Anaerolineaceae	g__Flexilinea	s__Flexilinea sp001717545
2237_6	1.90483e+06	public genome	1	1	0	0	nothing_new_here	p__Chloroflexota	c__Anaerolineae	o__Anaerolineales	f__EnvOPS12	g__CG2-30-58-95	s__
1854_9	1.96974e+06	public genome	1	1	0	0	nothing_new_here	p__Chloroflexota	c__Anaerolineae	o__B4-G1	f__SLSP01	g__DSWT01	s__
276_1	1.9862e+06	public genome	2	2	0	0	nothing_new_here	p__Chloroflexota	c__Anaerolineae	o__Anaerolineales	f__Anaerolineaceae	g__Brevefilum	s__Brevefilum fermentans
1621_1	2.0249e+06	public genome	1	1	0	0	nothing_new_here	p__Chloroflexota	c__Anaerolineae	o__SBR1031	f__A4b	g__	s__
2303_2	2.0249e+06	public genome	2	2	0	0	nothing_new_here	p__Chloroflexota	c__Anaerolineae	o__4572-78	f__J111	g__J095	s__
1621_2	2.0249e+06	public genome	1	1	0	0	nothing_new_here	p__Chloroflexota	c__Anaerolineae	o__SBR1031	f__A4b	g__	s__
323_0	2.0249e+06	public genome	1	1	0	0	nothing_new_here	p__Chloroflexota	c__Anaerolineae	o__Anaerolineales	f__Anaerolineaceae	g__Ch132	s__
258_0	2.0249e+06	public genome	1	1	0	0	nothing_new_here	p__Chloroflexota	c__Anaerolineae	o__Anaerolineales	f__Anaerolineaceae	g__UBA5203	s__
162_0	2.0249e+06	public genome	1	1	0	0	nothing_new_here	p__Chloroflexota	c__Anaerolineae	o__Anaerolineales	f__Anaerolineaceae	g__UBA5203	s__
2038_4	2.02672e+06	public genome	1	1	0	0	nothing_new_here	p__Chloroflexota	c__Chloroflexia	o__Chloroflexales	f__Herpetosiphonaceae	g__Herpetosiphon	s__
1348_0	2.02672e+06	public genome	1	1	0	0	nothing_new_here	p__Chloroflexota	c__Ellin6529	o__QHBO01	f__QHBO01	g__	s__
1210_0	2.02672e+06	public genome	1	1	0	0	nothing_new_here	p__Chloroflexota	c__UBA6077	o__UBA6077	f__CF-72	g__CF-72	s__
556_1	2.02672e+06	public genome	1	1	0	0	nothing_new_here	p__Chloroflexota	c__Anaerolineae	o__Promineofilales	f__Promineofilaceae	g__WTJY01	s__
560_0	2.02672e+06	public genome	1	1	0	0	nothing_new_here	p__Chloroflexota	c__Anaerolineae	o__Promineofilales	f__Promineofilaceae	g__WTJY01	s__
556_2	2.02672e+06	public genome	1	1	0	0	nothing_new_here	p__Chloroflexota	c__Anaerolineae	o__Promineofilales	f__Promineofilaceae	g__WTJY01	s__
1852_1	2.02672e+06	public genome	1	1	0	0	nothing_new_here	p__Chloroflexota	c__Anaerolineae	o__B4-G1	f__SLSP01	g__DSWT01	s__
786_3	2.02672e+06	public genome	1	1	0	0	nothing_new_here	p__Chloroflexota	c__Anaerolineae	o__UBA1429	f__UBA1429	g__	s__
2258_3	2.02672e+06	public genome	1	1	0	0	nothing_new_here	p__Chloroflexota	c__Anaerolineae	o__Anaerolineales	f__EnvOPS12	g__DTJF01	s__
568_3	2.02672e+06	public genome	1	1	0	0	nothing_new_here	p__Chloroflexota	c__Anaerolineae	o__SBR1031	f__Ch27	g__Ch27	s__
2314_0	2.02672e+06	public genome	1	1	0	0	nothing_new_here	p__Chloroflexota	c__Anaerolineae	o__JAAYEA01	f__JAAYEA01	g__	s__
1854_3	2.02672e+06	public genome	3	2	1	0	old+new_onlyMAGsSRA	p__Chloroflexota	c__Anaerolineae	o__B4-G1	f__SLSP01	g__DSWT01	s__DSWT01 sp011370065
2257_2	2.02672e+06	public genome	1	1	0	0	nothing_new_here	p__Chloroflexota	c__Anaerolineae	o__Anaerolineales	f__EnvOPS12	g__DSXF01	s__
310_2	2.02672e+06	public genome	1	1	0	0	nothing_new_here	p__Chloroflexota	c__Anaerolineae	o__Anaerolineales	f__Anaerolineaceae	g__49-20	s__49-20 sp003499715
1220_0	2.02672e+06	public genome	1	1	0	0	nothing_new_here	p__Chloroflexota	c__UBA6077	o__UBA6077	f__CF-72	g__	s__
1350_0	2.02672e+06	public genome	1	1	0	0	nothing_new_here	p__Chloroflexota	c__Ellin6529	o__QHBO01	f__QHBO01	g__	s__
1511_0	2.02672e+06	public genome	1	1	0	0	nothing_new_here	p__Chloroflexota	c__Chloroflexia	o__	f__	g__	s__
1221_0	2.02672e+06	public genome	1	1	0	0	nothing_new_here	p__Chloroflexota	c__UBA6077	o__UBA6077	f__CF-72	g__	s__
1171_0	2.02672e+06	public genome	1	1	0	0	nothing_new_here	p__Chloroflexota	c__UBA6077	o__UBA6077	f__CF-72	g__	s__
1014_5	2.02672e+06	public genome	1	1	0	0	nothing_new_here	p__Chloroflexota	c__UBA11872	o__VXOZ01	f__VXOZ01	g__VXOZ01	s__VXOZ01 sp012270555
1640_1	2.02673e+06	public genome	2	2	0	0	nothing_new_here	p__Chloroflexota	c__Dehalococcoidia	o__Dehalococcoidales	f__SURF-40	g__SURF-40	s__SURF-40 sp003599745
1306_1	2.02673e+06	public genome	5	3	2	0	old+new_onlyMAGsSRA	p__Chloroflexota	c__Dehalococcoidia	o__UBA2991	f__UBA2991	g__UBA2991	s__UBA2991 sp009841435
961_0	2.02673e+06	public genome	1	1	0	0	nothing_new_here	p__Chloroflexota	c__Dehalococcoidia	o__UBA3495	f__JAAXIE01	g__JAAXIE01	s__JAAXIE01 sp012270525
996_3	2.02673e+06	public genome	1	1	0	0	nothing_new_here	p__Chloroflexota	c__Dehalococcoidia	o__SAR202	f__UBA11138	g__JAAXHZ01	s__JAAXHZ01 sp012270625
1013_0	2.02673e+06	public genome	1	1	0	0	nothing_new_here	p__Chloroflexota	c__Dehalococcoidia	o__Plut-88900	f__Plut-88900	g__Plut-88900	s__Plut-88900 sp012270635
986_4	2.02673e+06	public genome	1	1	0	0	nothing_new_here	p__Chloroflexota	c__Dehalococcoidia	o__SAR202	f__UBA11138	g__VXRN01	s__VXRN01 sp012270665
1238_1	2.02673e+06	public genome	1	1	0	0	nothing_new_here	p__Chloroflexota	c__Dehalococcoidia	o__Bin125	f__Bin125	g__	s__
677_6	2.02673e+06	public genome	1	1	0	0	nothing_new_here	p__Chloroflexota	c__Dehalococcoidia	o__UBA1151	f__Bin127	g__Bin127	s__Bin127 sp012270805
989_2	2.02673e+06	public genome	1	1	0	0	nothing_new_here	p__Chloroflexota	c__Dehalococcoidia	o__SAR202	f__UBA11138	g__Bin90	s__
945_0	2.02673e+06	public genome	1	1	0	0	nothing_new_here	p__Chloroflexota	c__Dehalococcoidia	o__UBA6926	f__UBA6926	g__VXMO01	s__VXMO01 sp012271225
831_2	2.02673e+06	public genome	1	1	0	0	nothing_new_here	p__Chloroflexota	c__Dehalococcoidia	o__UBA1151	f__UBA1151	g__GCA-2730555	s__GCA-2730555 sp014239685
1573_0	2.02673e+06	public genome	1	1	0	0	nothing_new_here	p__Chloroflexota	c__Dehalococcoidia	o__UBA1151	f__TMED-70	g__	s__
1312_1	2.02673e+06	public genome	3	3	0	0	nothing_new_here	p__Chloroflexota	c__Dehalococcoidia	o__UBA2991	f__UBA2991	g__	s__
1291_1	2.02673e+06	public genome	4	4	0	0	nothing_new_here	p__Chloroflexota	c__Dehalococcoidia	o__UBA2979	f__UBA2979	g__W-Chloroflexi-9	s__
1283_1	2.02673e+06	public genome	1	1	0	0	nothing_new_here	p__Chloroflexota	c__Dehalococcoidia	o__UBA2979	f__UBA2979	g__RBC038	s__
1294_0	2.02673e+06	public genome	1	1	0	0	nothing_new_here	p__Chloroflexota	c__Dehalococcoidia	o__UBA2991	f__UBA2991	g__UCB2	s__
1308_1	2.02673e+06	public genome	1	1	0	0	nothing_new_here	p__Chloroflexota	c__Dehalococcoidia	o__UBA2991	f__UBA2991	g__	s__
1309_0	2.02673e+06	public genome	1	1	0	0	nothing_new_here	p__Chloroflexota	c__Dehalococcoidia	o__UBA2991	f__UBA2991	g__	s__
1304_1	2.02673e+06	public genome	1	1	0	0	nothing_new_here	p__Chloroflexota	c__Dehalococcoidia	o__UBA2991	f__UBA2991	g__41671	s__
2038_1	2.02975e+06	public genome	1	1	0	0	nothing_new_here	p__Chloroflexota	c__Chloroflexia	o__Chloroflexales	f__Herpetosiphonaceae	g__Herpetosiphon	s__
1963_7	2.05214e+06	public genome	1	1	0	0	nothing_new_here	p__Chloroflexota	c__Anaerolineae	o__SBR1031	f__A4b	g__UBA6055	s__UBA6055 sp012270545
1067_4	2.05214e+06	public genome	1	1	0	0	nothing_new_here	p__Chloroflexota	c__Anaerolineae	o__SBR1031	f__A4b	g__GCA-2702065	s__
1940_1	2.05214e+06	public genome	4	4	0	0	nothing_new_here	p__Chloroflexota	c__Anaerolineae	o__SBR1031	f__A4b	g__GCA-2699585	s__
1621_3	2.05214e+06	public genome	1	1	0	0	nothing_new_here	p__Chloroflexota	c__Anaerolineae	o__SBR1031	f__A4b	g__GCA-2699585	s__
1990_1	2.05214e+06	public genome	2	2	0	0	nothing_new_here	p__Chloroflexota	c__Anaerolineae	o__SBR1031	f__A4b	g__OLB15	s__
1795_2	2.05214e+06	public genome	8	7	1	0	mostly_old	p__Chloroflexota	c__Anaerolineae	o__Caldilineales	f__JAAEKA01	g__JAAEKA01	s__
1783_0	2.05214e+06	public genome	1	1	0	0	nothing_new_here	p__Chloroflexota	c__Anaerolineae	o__4572-78	f__J111	g__DSQQ01	s__
2303_3	2.05214e+06	public genome	1	1	0	0	nothing_new_here	p__Chloroflexota	c__Anaerolineae	o__4572-78	f__J111	g__J095	s__
2304_1	2.05214e+06	public genome	1	1	0	0	nothing_new_here	p__Chloroflexota	c__Anaerolineae	o__4572-78	f__J111	g__J095	s__
2304_2	2.05214e+06	public genome	1	1	0	0	nothing_new_here	p__Chloroflexota	c__Anaerolineae	o__4572-78	f__J111	g__J095	s__
1960_0	2.05214e+06	public genome	1	1	0	0	nothing_new_here	p__Chloroflexota	c__Anaerolineae	o__SBR1031	f__A4b	g__GCA-2702065	s__
1918_0	2.05214e+06	public genome	1	1	0	0	nothing_new_here	p__Chloroflexota	c__Anaerolineae	o__SBR1031	f__A4b	g__	s__
2277_0	2.05214e+06	public genome	1	1	0	0	nothing_new_here	p__Chloroflexota	c__Anaerolineae	o__SBR1031	f__J027	g__SB15	s__
1869_0	2.05214e+06	public genome	1	1	0	0	nothing_new_here	p__Chloroflexota	c__Anaerolineae	o__SBR1031	f__A4b	g__CFX2	s__
1958_0	2.05214e+06	public genome	1	1	0	0	nothing_new_here	p__Chloroflexota	c__Anaerolineae	o__SBR1031	f__A4b	g__GCA-2702065	s__
2517_1	2.05214e+06	public genome	1	1	0	0	nothing_new_here	p__Chloroflexota	c__Anaerolineae	o__SBR1031	f__J027	g__CFX10	s__
1949_1	2.05214e+06	public genome	1	1	0	0	nothing_new_here	p__Chloroflexota	c__Anaerolineae	o__Promineofilales	f__Promineofilaceae	g__GCA-2699125	s__
1883_1	2.05214e+06	public genome	1	1	0	0	nothing_new_here	p__Chloroflexota	c__Anaerolineae	o__SBR1031	f__UBA2029	g__MO-CFX2	s__
1931_1	2.05214e+06	public genome	1	1	0	0	nothing_new_here	p__Chloroflexota	c__Anaerolineae	o__SBR1031	f__A4b	g__OLB15	s__
1991_1	2.05214e+06	public genome	1	1	0	0	nothing_new_here	p__Chloroflexota	c__Anaerolineae	o__SBR1031	f__A4b	g__OLB15	s__
1193_0	2.05214e+06	public genome	1	1	0	0	nothing_new_here	p__Chloroflexota	c__Anaerolineae	o__SBR1031	f__UBA2796	g__	s__
1158_0	2.05214e+06	public genome	1	1	0	0	nothing_new_here	p__Chloroflexota	c__Anaerolineae	o__UBA4142	f__SHND01	g__SHND01	s__
2085_0	2.05214e+06	public genome	1	1	0	0	nothing_new_here	p__Chloroflexota	c__Anaerolineae	o__SBR1031	f__UBA2796	g__UBA2796	s__
1726_0	2.05214e+06	public genome	1	1	0	0	nothing_new_here	p__Chloroflexota	c__Anaerolineae	o__SBR1031	f__UBA3940	g__	s__
525_0	2.05214e+06	public genome	1	1	0	0	nothing_new_here	p__Chloroflexota	c__Anaerolineae	o__DUEN01	f__	g__	s__
1543_1	2.05214e+06	public genome	3	3	0	0	nothing_new_here	p__Chloroflexota	c__Anaerolineae	o__SBR1031	f__UBA2796	g__UBA2796	s__
473_1	2.06077e+06	public genome	2	2	0	0	nothing_new_here	p__Chloroflexota	c__Chloroflexia	o__Thermomicrobiales	f__	g__	s__
203_1	2.07312e+06	public genome	1	1	0	0	nothing_new_here	p__Chloroflexota	c__Anaerolineae	o__Anaerolineales	f__UBA11858	g__B10-G9	s__
331_2	2.07312e+06	public genome	2	1	1	0	old+new_onlyMAGsSRA	p__Chloroflexota	c__Anaerolineae	o__Anaerolineales	f__UBA4823	g__RBG-16-57-11	s__
1702_0	2.07312e+06	public genome	1	1	0	0	nothing_new_here	p__Chloroflexota	c__Anaerolineae	o__Anaerolineales	f__UBA4823	g__RBG-16-57-11	s__
2011_0	2.07312e+06	public genome	1	1	0	0	nothing_new_here	p__Chloroflexota	c__Anaerolineae	o__Anaerolineales	f__UBA4823	g__	s__
206_0	2.07312e+06	public genome	1	1	0	0	nothing_new_here	p__Chloroflexota	c__Anaerolineae	o__Anaerolineales	f__UBA11579	g__UBA11579	s__
2262_1	2.07312e+06	public genome	1	1	0	0	nothing_new_here	p__Chloroflexota	c__Anaerolineae	o__Anaerolineales	f__EnvOPS12	g__UBA8950	s__
1870_0	2.07312e+06	public genome	1	1	0	0	nothing_new_here	p__Chloroflexota	c__Anaerolineae	o__Anaerolineales	f__Anaerolineaceae	g__Ornatilinea	s__
2174_5	2.07312e+06	public genome	1	1	0	0	nothing_new_here	p__Chloroflexota	c__Anaerolineae	o__Anaerolineales	f__EnvOPS12	g__OLB14	s__OLB14 sp003599285
342_1	2.07312e+06	public genome	1	1	0	0	nothing_new_here	p__Chloroflexota	c__Anaerolineae	o__Anaerolineales	f__Anaerolineaceae	g__UBA6170	s__
2116_0	2.07312e+06	public genome	1	1	0	0	nothing_new_here	p__Chloroflexota	c__Anaerolineae	o__Anaerolineales	f__EnvOPS12	g__JAABUE01	s__
437_0	2.07312e+06	public genome	1	1	0	0	nothing_new_here	p__Chloroflexota	c__Anaerolineae	o__Anaerolineales	f__DRKV01	g__DRKV01	s__
356_2	2.07312e+06	public genome	1	1	0	0	nothing_new_here	p__Chloroflexota	c__Anaerolineae	o__Anaerolineales	f__Anaerolineaceae	g__UBA6107	s__
1946_1	2.07312e+06	public genome	2	2	0	0	nothing_new_here	p__Chloroflexota	c__Anaerolineae	o__Promineofilales	f__Promineofilaceae	g__GCA-2699125	s__
177_1	2.07312e+06	public genome	2	2	0	0	nothing_new_here	p__Chloroflexota	c__Anaerolineae	o__Promineofilales	f__Promineofilaceae	g__	s__
2337_0	2.07312e+06	public genome	1	1	0	0	nothing_new_here	p__Chloroflexota	c__Anaerolineae	o__Promineofilales	f__Promineofilaceae	g__SLGK01	s__
1947_1	2.07312e+06	public genome	1	1	0	0	nothing_new_here	p__Chloroflexota	c__Anaerolineae	o__Promineofilales	f__Promineofilaceae	g__GCA-2699125	s__
172_2	2.07312e+06	public genome	1	1	0	0	nothing_new_here	p__Chloroflexota	c__Anaerolineae	o__Promineofilales	f__Promineofilaceae	g__JAACFF01	s__
1955_0	2.07312e+06	public genome	1	1	0	0	nothing_new_here	p__Chloroflexota	c__Anaerolineae	o__Promineofilales	f__Promineofilaceae	g__JAACFF01	s__
180_0	2.07312e+06	public genome	1	1	0	0	nothing_new_here	p__Chloroflexota	c__Anaerolineae	o__Promineofilales	f__Promineofilaceae	g__WTJY01	s__
174_0	2.07312e+06	public genome	1	1	0	0	nothing_new_here	p__Chloroflexota	c__Anaerolineae	o__Promineofilales	f__Promineofilaceae	g__WTJY01	s__
1987_0	2.07312e+06	public genome	1	1	0	0	nothing_new_here	p__Chloroflexota	c__Anaerolineae	o__Anaerolineales	f__UBA6668	g__	s__
1986_1	2.07312e+06	public genome	1	1	0	0	nothing_new_here	p__Chloroflexota	c__Anaerolineae	o__Anaerolineales	f__UBA6668	g__	s__
1986_2	2.07312e+06	public genome	1	1	0	0	nothing_new_here	p__Chloroflexota	c__Anaerolineae	o__Anaerolineales	f__UBA6668	g__	s__
1992_0	2.07312e+06	public genome	1	1	0	0	nothing_new_here	p__Chloroflexota	c__Anaerolineae	o__SBR1031	f__J027	g__	s__
2303_1	2.07312e+06	public genome	5	4	1	0	mostly_old	p__Chloroflexota	c__Anaerolineae	o__4572-78	f__J111	g__J095	s__
2186_1	2.07312e+06	public genome	1	1	0	0	nothing_new_here	p__Chloroflexota	c__Anaerolineae	o__Anaerolineales	f__EnvOPS12	g__OLB14	s__
2185_1	2.07312e+06	public genome	2	2	0	0	nothing_new_here	p__Chloroflexota	c__Anaerolineae	o__Anaerolineales	f__EnvOPS12	g__OLB14	s__
729_0	2.07312e+06	public genome	1	1	0	0	nothing_new_here	p__Chloroflexota	c__Anaerolineae	o__Anaerolineales	f__UBA6663	g__	s__
2164_8	2.07312e+06	public genome	1	1	0	0	nothing_new_here	p__Chloroflexota	c__Anaerolineae	o__Anaerolineales	f__EnvOPS12	g__UBA12294	s__
2175_1	2.07312e+06	public genome	1	1	0	0	nothing_new_here	p__Chloroflexota	c__Anaerolineae	o__Anaerolineales	f__EnvOPS12	g__OLB14	s__
2164_7	2.07312e+06	public genome	1	1	0	0	nothing_new_here	p__Chloroflexota	c__Anaerolineae	o__Anaerolineales	f__EnvOPS12	g__UBA12294	s__
2164_2	2.07312e+06	public genome	1	1	0	0	nothing_new_here	p__Chloroflexota	c__Anaerolineae	o__Anaerolineales	f__EnvOPS12	g__UBA12294	s__
2244_2	2.07312e+06	public genome	1	1	0	0	nothing_new_here	p__Chloroflexota	c__Anaerolineae	o__Anaerolineales	f__UBA6663	g__	s__
2175_2	2.07312e+06	public genome	1	1	0	0	nothing_new_here	p__Chloroflexota	c__Anaerolineae	o__Anaerolineales	f__EnvOPS12	g__OLB14	s__
2273_2	2.07312e+06	public genome	1	1	0	0	nothing_new_here	p__Chloroflexota	c__Anaerolineae	o__Anaerolineales	f__UBA4823	g__UTCFX2	s__
338_0	2.08024e+06	public genome	1	1	0	0	nothing_new_here	p__Chloroflexota	c__Anaerolineae	o__Anaerolineales	f__Anaerolineaceae	g__Ornatilinea	s__
1812_1	2.29356e+06	public genome	9	8	1	0	mostly_old	p__Chloroflexota	c__Anaerolineae	o__Caldilineales	f__Caldilineaceae	g__Caldilinea	s__
1632_5	2.30606e+06	public genome	1	1	0	0	nothing_new_here	p__Chloroflexota	c__Anaerolineae	o__Caldilineales	f__Bin34	g__Bin34	s__Bin34 sp012271135
1778_1	2.30606e+06	public genome	2	1	1	0	old+new_onlyMAGsSRA	p__Chloroflexota	c__Anaerolineae	o__Caldilineales	f__J102	g__JABWBG01	s__
1795_1	2.42033e+06	public genome	5	5	0	0	nothing_new_here	p__Chloroflexota	c__Anaerolineae	o__Caldilineales	f__JAAEKA01	g__JAAEKA01	s__
1692_0	2.42033e+06	public genome	1	1	0	0	nothing_new_here	p__Chloroflexota	c__Anaerolineae	o__UCB3	f__UCB3	g__	s__
1515_0	2.48279e+06	public genome	1	1	0	0	nothing_new_here	p__Chloroflexota	c__Chloroflexia	o__Thermomicrobiales	f__UBA6265	g__UBA6265	s__
23_0	2.48279e+06	public genome	1	1	0	0	nothing_new_here	p__Chloroflexota	c__Chloroflexia	o__Thermomicrobiales	f__	g__	s__
1599_2	2.48279e+06	public genome	2	2	0	0	nothing_new_here	p__Chloroflexota	c__Chloroflexia	o__Thermomicrobiales	f__UBA6265	g__JACCXM01	s__
1204_0	2.48279e+06	public genome	1	1	0	0	nothing_new_here	p__Chloroflexota	c__Chloroflexia	o__Thermomicrobiales	f__UBA6265	g__	s__
1203_0	2.48279e+06	public genome	1	1	0	0	nothing_new_here	p__Chloroflexota	c__Chloroflexia	o__Thermomicrobiales	f__UBA6265	g__	s__
1496_0	2.48279e+06	public genome	1	1	0	0	nothing_new_here	p__Chloroflexota	c__Chloroflexia	o__Thermomicrobiales	f__	g__	s__
2235_0	2.48279e+06	public genome	1	1	0	0	nothing_new_here	p__Chloroflexota	c__Chloroflexia	o__Thermomicrobiales	f__	g__	s__
1519_1	2.48279e+06	public genome	1	1	0	0	nothing_new_here	p__Chloroflexota	c__Chloroflexia	o__Thermomicrobiales	f__UBA6265	g__JACCXM01	s__
1527_0	2.48279e+06	public genome	1	1	0	0	nothing_new_here	p__Chloroflexota	c__Chloroflexia	o__Thermomicrobiales	f__UBA6265	g__JACCXM01	s__
1490_1	2.48279e+06	public genome	1	1	0	0	nothing_new_here	p__Chloroflexota	c__Chloroflexia	o__Thermomicrobiales	f__	g__	s__
1574_1	2.52818e+06	public genome	1	1	0	0	nothing_new_here	p__Chloroflexota	c__Chloroflexia	o__Chloroflexales	f__Chloroflexaceae	g__Chloroploca	s__Chloroploca sp004762035
1974_0	2.61425e+06	public genome	1	1	0	0	nothing_new_here	p__Chloroflexota	c__Anaerolineae	o__Promineofilales	f__Promineofilaceae	g__	s__
2338_0	2.61425e+06	public genome	1	1	0	0	nothing_new_here	p__Chloroflexota	c__Anaerolineae	o__Promineofilales	f__Promineofilaceae	g__GCA-2746795	s__
1950_1	2.61425e+06	public genome	3	3	0	0	nothing_new_here	p__Chloroflexota	c__Anaerolineae	o__Promineofilales	f__Promineofilaceae	g__	s__
2043_0	2.61425e+06	public genome	1	1	0	0	nothing_new_here	p__Chloroflexota	c__Anaerolineae	o__Promineofilales	f__Promineofilaceae	g__GCA-2746795	s__
1952_1	2.61425e+06	public genome	3	3	0	0	nothing_new_here	p__Chloroflexota	c__Anaerolineae	o__Promineofilales	f__Promineofilaceae	g__GCA-2746795	s__
1975_0	2.61425e+06	public genome	1	1	0	0	nothing_new_here	p__Chloroflexota	c__Anaerolineae	o__Promineofilales	f__Promineofilaceae	g__GCA-2746795	s__
1948_1	2.61425e+06	public genome	2	2	0	0	nothing_new_here	p__Chloroflexota	c__Anaerolineae	o__Promineofilales	f__Promineofilaceae	g__GCA-2699125	s__
1947_2	2.61425e+06	public genome	1	1	0	0	nothing_new_here	p__Chloroflexota	c__Anaerolineae	o__Promineofilales	f__Promineofilaceae	g__GCA-2699125	s__
1948_2	2.61425e+06	public genome	1	1	0	0	nothing_new_here	p__Chloroflexota	c__Anaerolineae	o__Promineofilales	f__Promineofilaceae	g__GCA-2699125	s__
172_1	2.61425e+06	public genome	2	2	0	0	nothing_new_here	p__Chloroflexota	c__Anaerolineae	o__Promineofilales	f__Promineofilaceae	g__JAACFF01	s__
2044_0	2.61425e+06	public genome	1	1	0	0	nothing_new_here	p__Chloroflexota	c__Anaerolineae	o__Promineofilales	f__Promineofilaceae	g__	s__
2310_1	2.61425e+06	public genome	6	6	0	0	nothing_new_here	p__Chloroflexota	c__Anaerolineae	o__Promineofilales	f__Promineofilaceae	g__	s__
2105_1	2.61425e+06	public genome	2	2	0	0	nothing_new_here	p__Chloroflexota	c__Anaerolineae	o__Ardenticatenales	f__Ardenticatenaceae	g__	s__
1792_1	2.61425e+06	public genome	2	2	0	0	nothing_new_here	p__Chloroflexota	c__Anaerolineae	o__Caldilineales	f__Caldilineaceae	g__JAAUPU01	s__
2348_0	2.61425e+06	public genome	1	1	0	0	nothing_new_here	p__Chloroflexota	c__Anaerolineae	o__Caldilineales	f__Caldilineaceae	g__CFX5	s__
2347_1	2.61425e+06	public genome	2	2	0	0	nothing_new_here	p__Chloroflexota	c__Anaerolineae	o__Caldilineales	f__Caldilineaceae	g__CFX5	s__
2346_1	2.61425e+06	public genome	6	6	0	0	nothing_new_here	p__Chloroflexota	c__Anaerolineae	o__Caldilineales	f__Caldilineaceae	g__JAAUPU01	s__
1794_2	2.61425e+06	public genome	1	1	0	0	nothing_new_here	p__Chloroflexota	c__Anaerolineae	o__Caldilineales	f__Caldilineaceae	g__JAAUPU01	s__
1794_1	2.61425e+06	public genome	2	2	0	0	nothing_new_here	p__Chloroflexota	c__Anaerolineae	o__Caldilineales	f__Caldilineaceae	g__JAAUPU01	s__
2336_1	2.61425e+06	public genome	1	1	0	0	nothing_new_here	p__Chloroflexota	c__Anaerolineae	o__Caldilineales	f__Caldilineaceae	g__Litorilinea	s__
2320_0	2.61425e+06	public genome	1	1	0	0	nothing_new_here	p__Chloroflexota	c__Anaerolineae	o__Caldilineales	f__Caldilineaceae	g__Litorilinea	s__
1978_1	2.66418e+06	public genome	1	1	0	0	nothing_new_here	p__Chloroflexota	c__Anaerolineae	o__Promineofilales	f__Promineofilaceae	g__Promineofilum	s__
477_0	2.73951e+06	public genome	1	1	0	0	nothing_new_here	p__Chloroflexota	c__Dehalococcoidia	o__UBA2991	f__UBA2991	g__	s__
418_0	2.74054e+06	public genome	1	1	0	0	nothing_new_here	p__Chloroflexota	c__Ktedonobacteria	o__Ktedonobacterales	f__Ktedonobacteraceae	g__DTNP01	s__
1152_3	2.80296e+06	public genome	1	1	0	0	nothing_new_here	p__Chloroflexota	c__Anaerolineae	o__UBA4142	f__UBA4142	g__CAIKBD01	s__
2249_1	2.80296e+06	public genome	1	1	0	0	nothing_new_here	p__Chloroflexota	c__Anaerolineae	o__Anaerolineales	f__E44-bin32	g__	s__
2140_0	2.80296e+06	public genome	1	1	0	0	nothing_new_here	p__Chloroflexota	c__Anaerolineae	o__Anaerolineales	f__UBA4823	g__CAIQJJ01	s__
1592_1	2.86671e+06	public genome	1	1	0	0	nothing_new_here	p__Chloroflexota	c__Chloroflexia	o__Chloroflexales	f__Chloroflexaceae	g__Oscillochloris	s__
161_2	2061766007_347	public genome	1	1	0	0	nothing_new_here	p__Chloroflexota	c__Dehalococcoidia	o__Dehalococcoidales	f__UBA5627	g__UBA1222	s__UBA1222 sp002309415
714_0	2084038021_1	public genome	1	1	0	0	nothing_new_here	p__Chloroflexota	c__Dehalococcoidia	o__GIF9	f__AB-539-J10	g__	s__
951_1	3300000169_14	public genome	1	1	0	0	nothing_new_here	p__Chloroflexota	c__Dehalococcoidia	o__UBA2991	f__UBA2991	g__HRBIN29	s__
953_0	3300000205_14	public genome	1	1	0	0	nothing_new_here	p__Chloroflexota	c__Dehalococcoidia	o__UBA2991	f__UBA2991	g__	s__
2255_0	3300000227_31	public genome	1	1	0	0	nothing_new_here	p__Chloroflexota	c__Anaerolineae	o__Anaerolineales	f__envOPS12	g__UBA5195	s__
874_0	3300000231_14	public genome	1	1	0	0	nothing_new_here	p__Chloroflexota	c__Anaerolineae	o__Thermoflexales	f__Fen-1058	g__	s__
2180_1	3300000234_37	public genome	1	1	0	0	nothing_new_here	p__Chloroflexota	c__Anaerolineae	o__Anaerolineales	f__envOPS12	g__OLB14	s__
846_1	3300000362_32	public genome	2	2	0	0	nothing_new_here	p__Chloroflexota	c__Anaerolineae	o__	f__	g__	s__
847_1	3300000426_3	public genome	2	2	0	0	nothing_new_here	p__Chloroflexota	c__Anaerolineae	o__	f__	g__	s__
282_0	3300000426_7	public genome	1	1	0	0	nothing_new_here	p__Chloroflexota	c__Anaerolineae	o__Anaerolineales	f__Anaerolineaceae	g__Brevefilum	s__
1693_0	3300000463_1	public genome	1	1	0	0	nothing_new_here	p__Chloroflexota	c__Anaerolineae	o__	f__	g__	s__
673_1	3300000477_28	public genome	1	1	0	0	nothing_new_here	p__Chloroflexota	c__Dehalococcoidia	o__GIF9	f__AB-539-J10	g__RBG-13-51-36	s__
386_1	3300000866_7	public genome	2	1	1	0	old+new_onlyMAGsSRA	p__Chloroflexota	c__Anaerolineae	o__	f__	g__	s__
1118_0	3300000980_6	public genome	1	1	0	0	nothing_new_here	p__Chloroflexota	c__Anaerolineae	o__Caldilineales	f__Caldilineaceae	g__	s__
1097_1	3300001683_28	public genome	3	3	0	0	nothing_new_here	p__Chloroflexota	c__Dehalococcoidia	o__UBA3495	f__UBA3495	g__UBA9611	s__
496_0	3300002462_35	public genome	1	1	0	0	nothing_new_here	p__Chloroflexota	c__Dehalococcoidia	o__Dehalococcoidales	f__UBA5627	g__	s__
445_1	3300002821_50	public genome	2	2	0	0	nothing_new_here	p__Chloroflexota	c__Dehalococcoidia	o__UBA2247	f__UBA2247	g__UBA2247	s__UBA2247 sp002347295
266_1	3300005068_13	public genome	1	1	0	0	nothing_new_here	p__Chloroflexota	c__Anaerolineae	o__Anaerolineales	f__Anaerolineaceae	g__Brevefilum	s__
1844_0	3300005101_3	public genome	1	1	0	0	nothing_new_here	p__Chloroflexota	c__Anaerolineae	o__	f__	g__	s__
383_1	3300005274_9	public genome	5	4	1	0	mostly_old	p__Chloroflexota	c__Chloroflexia	o__Thermobaculales	f__Thermobaculaceae	g__Thermobaculum	s__Thermobaculum terrenum
1551_0	3300005286_12	public genome	1	1	0	0	nothing_new_here	p__Chloroflexota	c__Chloroflexia	o__Chloroflexales	f__	g__	s__
2154_0	3300005294_8	public genome	1	1	0	0	nothing_new_here	p__Chloroflexota	c__Anaerolineae	o__Anaerolineales	f__envOPS12	g__UBA12294	s__
384_1	3300005298_10	public genome	5	2	3	0	old+new_onlyMAGsSRA	p__Chloroflexota	c__Anaerolineae	o__	f__	g__	s__
1740_9	3300005300_5	public genome	19	12	6	1	old+new_MAGsSRA+Sample	p__Chloroflexota	c__Anaerolineae	o__Thermoflexales	f__Thermoflexaceae	g__Thermoflexus	s__Thermoflexus hugenholtzii
1197_0	3300005471_18	public genome	1	1	0	0	nothing_new_here	p__Chloroflexota	c__Ktedonobacteria	o__Ktedonobacterales	f__	g__	s__
1440_9	3300005471_47	public genome	1	1	0	0	nothing_new_here	p__Dormibacterota	c__Dormibacteria	o__	f__	g__	s__
2210_0	3300005518_26	public genome	1	1	0	0	nothing_new_here	p__Chloroflexota	c__Anaerolineae	o__Anaerolineales	f__envOPS12	g__UBA12294	s__
1156_1	3300005529_35	public genome	1	1	0	0	nothing_new_here	p__Chloroflexota	c__Anaerolineae	o__UBA4142	f__UBA4142	g__	s__
2122_1	3300005529_69	public genome	1	1	0	0	nothing_new_here	p__Chloroflexota	c__UBA2235	o__UBA12225	f__	g__	s__
2214_1	3300005529_73	public genome	1	1	0	0	nothing_new_here	p__Chloroflexota	c__Anaerolineae	o__Anaerolineales	f__envOPS12	g__Fen-1038	s__
2286_0	3300005529_81	public genome	1	1	0	0	nothing_new_here	p__Chloroflexota	c__	o__	f__	g__	s__
967_1	3300005613_29	public genome	1	1	0	0	nothing_new_here	p__Chloroflexota	c__Dehalococcoidia	o__	f__	g__	s__
902_0	3300005858_26	public genome	1	1	0	0	nothing_new_here	p__Chloroflexota	c__Dehalococcoidia	o__UBA1127	f__HRBIN23	g__HRBIN23	s__
91_1	3300005962_1	public genome	4	3	1	0	mostly_old	p__Chloroflexota	c__Anaerolineae	o__Anaerolineales	f__envOPS12	g__	s__
2352_0	3300005985_20	public genome	1	1	0	0	nothing_new_here	p__Chloroflexota	c__Anaerolineae	o__Anaerolineales	f__envOPS12	g__UBA12294	s__
1932_0	3300005985_21	public genome	1	1	0	0	nothing_new_here	p__Chloroflexota	c__Anaerolineae	o__SBR1031	f__A4b	g__OLB15	s__
2355_1	3300006045_129	public genome	1	1	0	0	nothing_new_here	p__Chloroflexota	c__Dehalococcoidia	o__Dehalococcoidales	f__UBA5627	g__	s__
1000_1	3300006315_3	public genome	4	4	0	0	nothing_new_here	p__Chloroflexota	c__Dehalococcoidia	o__SAR202	f__UBA826	g__GCA-002712965	s__
2532_1	3300006565_7	public genome	7	7	0	0	nothing_new_here	p__Chloroflexota	c__Dehalococcoidia	o__UBA3495	f__UBA2588	g__UBA2588	s__UBA2588 sp002723125
1099_1	3300006902_18	public genome	2	2	0	0	nothing_new_here	p__Chloroflexota	c__Dehalococcoidia	o__UBA3495	f__UBA3495	g__UBA9611	s__
211_1	3300006902_26	public genome	2	2	0	0	nothing_new_here	p__Chloroflexota	c__Anaerolineae	o__Anaerolineales	f__UBA11657	g__UBA11657	s__
886_2	3300006902_27	public genome	1	1	0	0	nothing_new_here	p__Chloroflexota	c__Dehalococcoidia	o__UBA2979	f__UBA2979	g__UBA2979	s__
2006_0	3300007771_9	public genome	1	1	0	0	nothing_new_here	p__Chloroflexota	c__Anaerolineae	o__Anaerolineales	f__envOPS12	g__	s__
1132_0	3300007776_5	public genome	1	1	0	0	nothing_new_here	p__Chloroflexota	c__Anaerolineae	o__	f__	g__	s__
1362_1	3300009083_71	public genome	2	2	0	0	nothing_new_here	p__Chloroflexota	c__Ellin6529	o__CSP1-4	f__CSP1-4	g__Palsa-1032	s__
2180_5	3300009083_98	public genome	1	1	0	0	nothing_new_here	p__Chloroflexota	c__Anaerolineae	o__Anaerolineales	f__envOPS12	g__OLB14	s__
1680_1	3300009084_49	public genome	1	1	0	0	nothing_new_here	p__Chloroflexota	c__Anaerolineae	o__SBR1031	f__A4b	g__GCA-2699585	s__
1484_1	3300009084_65	public genome	2	2	0	0	nothing_new_here	p__Chloroflexota	c__Chloroflexia	o__Thermomicrobiales	f__UBA6265	g__	s__
2129_1	3300009084_66	public genome	2	2	0	0	nothing_new_here	p__Chloroflexota	c__Anaerolineae	o__Thermoflexales	f__	g__	s__
1773_2	3300009084_78	public genome	3	1	2	0	old+new_onlyMAGsSRA	p__Chloroflexota	c__Anaerolineae	o__SBR1031	f__A4b	g__OLB13	s__
2158_0	3300009156_39	public genome	1	1	0	0	nothing_new_here	p__Chloroflexota	c__Anaerolineae	o__Anaerolineales	f__envOPS12	g__UBA12294	s__
710_1	3300009503_241	public genome	2	1	1	0	old+new_onlyMAGsSRA	p__Chloroflexota	c__Dehalococcoidia	o__GIF9	f__	g__	s__
903_2	3300009503_98	public genome	2	1	1	0	old+new_onlyMAGsSRA	p__Chloroflexota	c__Dehalococcoidia	o__Dehalococcoidales	f__UBA3254	g__UBA3254	s__
1501_1	3300009540_39	public genome	3	3	0	0	nothing_new_here	p__Chloroflexota	c__Chloroflexia	o__Thermomicrobiales	f__	g__	s__
852_3	3300009566_15	public genome	1	1	0	0	nothing_new_here	p__Chloroflexota	c__Anaerolineae	o__	f__	g__	s__
358_0	3300009566_20	public genome	1	1	0	0	nothing_new_here	p__Chloroflexota	c__Anaerolineae	o__Anaerolineales	f__Anaerolineaceae	g__	s__
1791_0	3300009702_33	public genome	1	1	0	0	nothing_new_here	p__Chloroflexota	c__Anaerolineae	o__Caldilineales	f__Caldilineaceae	g__	s__
1698_0	3300009767_9	public genome	1	1	0	0	nothing_new_here	p__Chloroflexota	c__Anaerolineae	o__UBA1429	f__	g__	s__
1847_0	3300009773_15	public genome	1	1	0	0	nothing_new_here	p__Chloroflexota	c__Anaerolineae	o__Promineofilales	f__Promineofilaceae	g__	s__
765_1	3300009773_24	public genome	1	1	0	0	nothing_new_here	p__Chloroflexota	c__Anaerolineae	o__UBA1429	f__UBA1429	g__	s__
411_1	3300009773_25	public genome	2	2	0	0	nothing_new_here	p__Chloroflexota	c__Anaerolineae	o__	f__	g__	s__
480_0	3300010167_154	public genome	1	1	0	0	nothing_new_here	p__Chloroflexota	c__Dehalococcoidia	o__Dehalococcoidales	f__UBA5627	g__	s__
742_1	3300010167_265	public genome	1	1	0	0	nothing_new_here	p__Chloroflexota	c__Dehalococcoidia	o__Dehalococcoidales	f__UBA4087	g__	s__
2270_1	3300010277_6	public genome	2	1	1	0	old+new_onlyMAGsSRA	p__Chloroflexota	c__Anaerolineae	o__SBR1031	f__UBA3940	g__UBA3940	s__UBA3940 sp002385675
742_2	3300010882_69	public genome	1	1	0	0	nothing_new_here	p__Chloroflexota	c__Dehalococcoidia	o__Dehalococcoidales	f__Dehalococcoidaceae	g__	s__
1884_8	3300011965_1	public genome	2	1	1	0	old+new_onlyMAGsSRA	p__Chloroflexota	c__Anaerolineae	o__SBR1031	f__UBA2029	g__UBA2029	s__UBA2029 sp002332795
1420_2	3300012001_11	public genome	1	1	0	0	nothing_new_here	p__Dormibacterota	c__Dormibacteria	o__Dormibacterales	f__Dormibacteraceae	g__UBA6019	s__UBA6019 sp002427995
1408_1	3300012004_1	public genome	1	1	0	0	nothing_new_here	p__Chloroflexota	c__Ellin6529	o__CSP1-4	f__CSP1-4	g__UBA5189	s__UBA5189 sp002413045
1341_0	3300012005_26	public genome	1	1	0	0	nothing_new_here	p__Chloroflexota	c__Ellin6529	o__QHBO01	f__QHBO01	g__QHBO01	s__
59_1	3300012008_6	public genome	6	6	0	0	nothing_new_here	p__Chloroflexota	c__Ktedonobacteria	o__Ktedonobacterales	f__Ktedonobacteraceae	g__UBA11361	s__
1459_1	3300012014_15	public genome	1	1	0	0	nothing_new_here	p__Dormibacterota	c__Dormibacteria	o__	f__	g__	s__
2161_0	3300012530_4	public genome	1	1	0	0	nothing_new_here	p__Chloroflexota	c__Anaerolineae	o__Anaerolineales	f__envOPS12	g__UBA12294	s__
2309_1	3300012533_38	public genome	2	2	0	0	nothing_new_here	p__Chloroflexota	c__Anaerolineae	o__Ardenticatenales	f__	g__	s__
2164_4	3300012533_44	public genome	1	1	0	0	nothing_new_here	p__Chloroflexota	c__Anaerolineae	o__Anaerolineales	f__envOPS12	g__UBA12294	s__
2073_1	3300012533_54	public genome	2	2	0	0	nothing_new_here	p__Chloroflexota	c__Anaerolineae	o__Thermoflexales	f__	g__	s__
2332_0	3300012682_11	public genome	1	1	0	0	nothing_new_here	p__Chloroflexota	c__UBA2235	o__UBA12225	f__UBA12225	g__	s__
1548_0	3300012682_25	public genome	1	1	0	0	nothing_new_here	p__Chloroflexota	c__Chloroflexia	o__Chloroflexales	f__Herpetosiphonaceae	g__	s__
1486_1	3300012682_36	public genome	1	1	0	0	nothing_new_here	p__Chloroflexota	c__Chloroflexia	o__Thermomicrobiales	f__UBA6265	g__	s__
1774_0	3300012943_43	public genome	1	1	0	0	nothing_new_here	p__Chloroflexota	c__Anaerolineae	o__SBR1031	f__A4b	g__OLB13	s__
2241_0	3300013123_12	public genome	1	1	0	0	nothing_new_here	p__Chloroflexota	c__Anaerolineae	o__Anaerolineales	f__Anaerolineaceae	g__Anaerolinea	s__
2021_0	3300013123_24	public genome	1	1	0	0	nothing_new_here	p__Chloroflexota	c__Anaerolineae	o__Anaerolineales	f__envOPS12	g__UBA5195	s__
1117_1	3300013123_29	public genome	2	2	0	0	nothing_new_here	p__Chloroflexota	c__Anaerolineae	o__Anaerolineales	f__	g__	s__
2506_1	3300013125_60	public genome	2	2	0	0	nothing_new_here	p__Chloroflexota	c__Anaerolineae	o__Anaerolineales	f__envOPS12	g__UBA12087	s__
2192_1	3300013126_12	public genome	1	1	0	0	nothing_new_here	p__Chloroflexota	c__Anaerolineae	o__Anaerolineales	f__envOPS12	g__OLB14	s__
80_8	3300013126_122	public genome	3	3	0	0	nothing_new_here	p__Chloroflexota	c__Ellin6529	o__CSP1-4	f__UBA10416	g__UBA10416	s__
2182_2	3300013126_24	public genome	1	1	0	0	nothing_new_here	p__Chloroflexota	c__Anaerolineae	o__Anaerolineales	f__envOPS12	g__OLB14	s__
2186_2	3300013126_35	public genome	1	1	0	0	nothing_new_here	p__Chloroflexota	c__Anaerolineae	o__Anaerolineales	f__envOPS12	g__OLB14	s__
403_0	3300013128_17	public genome	1	1	0	0	nothing_new_here	p__Chloroflexota	c__Anaerolineae	o__UBA2200	f__UBA2200	g__	s__
1062_1	3300013128_68	public genome	4	4	0	0	nothing_new_here	p__Chloroflexota	c__Dehalococcoidia	o__UBA3495	f__	g__	s__
419_0	3300013130_18	public genome	1	1	0	0	nothing_new_here	p__Chloroflexota	c__Anaerolineae	o__Anaerolineales	f__UBA6092	g__45689	s__
850_2	3300013130_51	public genome	1	1	0	0	nothing_new_here	p__Chloroflexota	c__Dehalococcoidia	o__	f__	g__	s__
1764_0	3300013132_47	public genome	1	1	0	0	nothing_new_here	p__Chloroflexota	c__Chloroflexia	o__Chloroflexales	f__Roseiflexaceae	g__UBA965	s__
2506_2	3300013136_86	public genome	1	1	0	0	nothing_new_here	p__Chloroflexota	c__Anaerolineae	o__Anaerolineales	f__envOPS12	g__UBA12087	s__
1823_0	3300013137_12	public genome	1	1	0	0	nothing_new_here	p__Chloroflexota	c__Anaerolineae	o__UBA3071	f__CG2-30-64-16	g__	s__
2022_0	3300013137_35	public genome	1	1	0	0	nothing_new_here	p__Chloroflexota	c__Anaerolineae	o__Anaerolineales	f__envOPS12	g__OLB14	s__
495_1	3300013137_80	public genome	1	1	0	0	nothing_new_here	p__Chloroflexota	c__Dehalococcoidia	o__Dehalococcoidales	f__UBA3254	g__	s__
355_2	3300013137_83	public genome	1	1	0	0	nothing_new_here	p__Chloroflexota	c__Anaerolineae	o__Anaerolineales	f__Anaerolineaceae	g__Leptolinea	s__
2178_0	3300013138_53	public genome	1	1	0	0	nothing_new_here	p__Chloroflexota	c__Anaerolineae	o__Anaerolineales	f__envOPS12	g__OLB14	s__
2023_0	3300013138_65	public genome	1	1	0	0	nothing_new_here	p__Chloroflexota	c__Anaerolineae	o__Anaerolineales	f__envOPS12	g__CG2-30-58-95	s__
82_10	3300013286_14	public genome	1	1	0	0	nothing_new_here	p__Chloroflexota	c__Ellin6529	o__CSP1-4	f__UBA10416	g__UBA10416	s__
300_1	3300013290_7	public genome	1	1	0	0	nothing_new_here	p__Chloroflexota	c__Anaerolineae	o__Anaerolineales	f__Anaerolineaceae	g__T78	s__
2189_1	3300013502_6	public genome	4	3	1	0	mostly_old	p__Chloroflexota	c__Anaerolineae	o__Anaerolineales	f__envOPS12	g__OLB14	s__OLB14 sp002343775
300_3	3300013829_7	public genome	1	1	0	0	nothing_new_here	p__Chloroflexota	c__Anaerolineae	o__Anaerolineales	f__Anaerolineaceae	g__T78	s__T78 sp002432795
268_0	3300013886_3	public genome	1	1	0	0	nothing_new_here	p__Chloroflexota	c__Anaerolineae	o__Anaerolineales	f__Anaerolineaceae	g__Brevefilum	s__
1571_2	3300014149_4	public genome	2	2	0	0	nothing_new_here	p__Chloroflexota	c__Chloroflexia	o__Chloroflexales	f__Roseiflexaceae	g__Roseiflexus	s__
1150_1	3300014149_6	public genome	1	1	0	0	nothing_new_here	p__Chloroflexota	c__Anaerolineae	o__UBA4142	f__UBA4142	g__UBA4142	s__
2316_0	3300014149_7	public genome	1	1	0	0	nothing_new_here	p__Chloroflexota	c__Anaerolineae	o__UBA4142	f__	g__	s__
492_1	3300014161_14	public genome	9	9	0	0	nothing_new_here	p__Chloroflexota	c__Dehalococcoidia	o__Dehalococcoidales	f__UBA3254	g__Fen-1064	s__
484_1	3300014496_19	public genome	2	2	0	0	nothing_new_here	p__Chloroflexota	c__Dehalococcoidia	o__GIF9	f__UBA5629	g__UBA1162	s__
1153_0	3300014686_1	public genome	1	1	0	0	nothing_new_here	p__Chloroflexota	c__Anaerolineae	o__UBA4142	f__UBA4142	g__UBA4142	s__UBA4142 sp002400365
2491_1	3300014827_7	public genome	2	2	0	0	nothing_new_here	p__Chloroflexota	c__UBA4733	o__UBA4733	f__UBA4733	g__UBA4733	s__UBA4733 sp002404055
1405_3	3300015063_3	public genome	1	1	0	0	nothing_new_here	p__Chloroflexota	c__Ellin6529	o__CSP1-4	f__CSP1-4	g__UBA5189	s__
1340_0	3300015079_3	public genome	1	1	0	0	nothing_new_here	p__Chloroflexota	c__Ellin6529	o__P2-11E	f__P2-11E	g__	s__
1471_0	3300015161_8	public genome	1	1	0	0	nothing_new_here	p__Chloroflexota	c__Chloroflexia	o__54-19	f__	g__	s__
2215_2	3300015195_11	public genome	1	1	0	0	nothing_new_here	p__Chloroflexota	c__Anaerolineae	o__Anaerolineales	f__envOPS12	g__Fen-1038	s__
1460_0	3300015195_12	public genome	1	1	0	0	nothing_new_here	p__Dormibacterota	c__Dormibacteria	o__	f__	g__	s__
1321_1	3300015199_8	public genome	1	1	0	0	nothing_new_here	p__Chloroflexota	c__Ellin6529	o__P2-11E	f__P2-11E	g__UBA4735	s__
1623_0	3300015202_3	public genome	1	1	0	0	nothing_new_here	p__Chloroflexota	c__Anaerolineae	o__SBR1031	f__UBA2796	g__	s__
384_2	3300017406_11	public genome	2	1	1	0	old+new_onlyMAGsSRA	p__Chloroflexota	c__Anaerolineae	o__	f__	g__	s__
1604_1	3300017419_10	public genome	2	1	1	0	old+new_onlyMAGsSRA	p__Chloroflexota	c__Anaerolineae	o__4572-78	f__NAK82	g__NAK82	s__
688_1	3300017419_30	public genome	2	1	1	0	old+new_onlyMAGsSRA	p__Chloroflexota	c__Dehalococcoidia	o__GIF9	f__AB-539-J10	g__RBG-13-51-36	s__
711_0	3300017419_31	public genome	1	1	0	0	nothing_new_here	p__Chloroflexota	c__Dehalococcoidia	o__GIF9	f__	g__	s__
1810_1	3300017419_4	public genome	5	1	4	0	mostly_new_onlyMAGsSRA	p__Chloroflexota	c__Anaerolineae	o__Caldilineales	f__Caldilineaceae	g__Caldilinea	s__
1562_1	3300017419_5	public genome	2	1	1	0	old+new_onlyMAGsSRA	p__Chloroflexota	c__Chloroflexia	o__Chloroflexales	f__Chloroflexaceae	g__Chloroflexus	s__
1584_4	3300017419_7	public genome	3	2	1	0	old+new_onlyMAGsSRA	p__Chloroflexota	c__Chloroflexia	o__Chloroflexales	f__Chloroflexaceae	g__	s__
1736_1	3300017419_9	public genome	2	1	1	0	old+new_onlyMAGsSRA	p__Chloroflexota	c__Anaerolineae	o__	f__	g__	s__
473_2	3300017426_18	public genome	1	1	0	0	nothing_new_here	p__Chloroflexota	c__Chloroflexia	o__	f__	g__	s__
1568_0	3300017426_19	public genome	1	1	0	0	nothing_new_here	p__Chloroflexota	c__Ktedonobacteria	o__Ktedonobacterales	f__Ktedonobacteraceae	g__	s__
1436_13	3300017426_29	public genome	1	1	0	0	nothing_new_here	p__Dormibacterota	c__Dormibacteria	o__Dormibacterales	f__Dormibacteraceae	g__40CM-4-65-16	s__
1458_3	3300017426_34	public genome	1	1	0	0	nothing_new_here	p__Dormibacterota	c__Dormibacteria	o__UBA8260	f__Bog-877	g__Bog-877	s__
1438_0	3300017426_41	public genome	1	1	0	0	nothing_new_here	p__Dormibacterota	c__Dormibacteria	o__	f__	g__	s__
2462_0	3300017426_8	public genome	1	1	0	0	nothing_new_here	p__Chloroflexota	c__UBA4733	o__UBA4733	f__UBA4733	g__	s__
1856_0	3300017431_13	public genome	1	1	0	0	nothing_new_here	p__Chloroflexota	c__Anaerolineae	o__	f__	g__	s__
1897_0	3300017431_18	public genome	1	1	0	0	nothing_new_here	p__Chloroflexota	c__Anaerolineae	o__Promineofilales	f__Promineofilaceae	g__	s__
913_1	3300017431_20	public genome	2	1	1	0	old+new_onlyMAGsSRA	p__Chloroflexota	c__Dehalococcoidia	o__SZUA-161	f__SZUA-161	g__SZUA-161	s__
672_2	3300017431_37	public genome	1	1	0	0	nothing_new_here	p__Chloroflexota	c__Dehalococcoidia	o__GIF9	f__AB-539-J10	g__RBG-13-51-36	s__
701_0	3300017431_42	public genome	1	1	0	0	nothing_new_here	p__Chloroflexota	c__Dehalococcoidia	o__GIF9	f__AB-539-J10	g__RBG-13-51-36	s__
2171_1	3300017444_35	public genome	2	1	1	0	old+new_onlyMAGsSRA	p__Chloroflexota	c__Anaerolineae	o__Anaerolineales	f__envOPS12	g__UBA12294	s__
1301_1	3300017444_37	public genome	2	1	1	0	old+new_onlyMAGsSRA	p__Chloroflexota	c__Dehalococcoidia	o__UBA2991	f__UBA2991	g__G233	s__
2050_1	3300017444_8	public genome	2	1	1	0	old+new_onlyMAGsSRA	p__Chloroflexota	c__Anaerolineae	o__4572-78	f__	g__	s__
488_1	3300017451_10	public genome	2	2	0	0	nothing_new_here	p__Chloroflexota	c__Dehalococcoidia	o__GIF9	f__UBA5629	g__UBA1162	s__
685_1	3300017451_12	public genome	1	1	0	0	nothing_new_here	p__Chloroflexota	c__Dehalococcoidia	o__GIF9	f__UBA5620	g__9FT-COMBO-48-23	s__
2339_1	3300017452_14	public genome	2	1	1	0	old+new_onlyMAGsSRA	p__Chloroflexota	c__Anaerolineae	o__	f__	g__	s__
396_1	3300017452_7	public genome	2	1	1	0	old+new_onlyMAGsSRA	p__Chloroflexota	c__Anaerolineae	o__	f__	g__	s__
80_9	3300017453_36	public genome	1	1	0	0	nothing_new_here	p__Chloroflexota	c__Ellin6529	o__CSP1-4	f__UBA10416	g__UBA10416	s__
2237_2	3300017458_5	public genome	1	1	0	0	nothing_new_here	p__Chloroflexota	c__Anaerolineae	o__Anaerolineales	f__envOPS12	g__CG2-30-58-95	s__
1849_1	3300017470_18	public genome	2	1	1	0	old+new_onlyMAGsSRA	p__Chloroflexota	c__Anaerolineae	o__	f__	g__	s__
2267_8	3300017473_2	public genome	1	1	0	0	nothing_new_here	p__Chloroflexota	c__Anaerolineae	o__Anaerolineales	f__envOPS12	g__UBA5195	s__
648_3	3300017477_14	public genome	1	1	0	0	nothing_new_here	p__Chloroflexota	c__Dehalococcoidia	o__Dehalococcoidales	f__UBA5760	g__	s__
804_1	3300017480_17	public genome	2	2	0	0	nothing_new_here	p__Chloroflexota	c__Chloroflexia	o__54-19	f__QHBQ01	g__	s__
490_0	3300017498_17	public genome	1	1	0	0	nothing_new_here	p__Chloroflexota	c__Dehalococcoidia	o__GIF9	f__UBA5629	g__UBA1162	s__
780_0	3300017509_5	public genome	1	1	0	0	nothing_new_here	p__Chloroflexota	c__Chloroflexia	o__54-19	f__54-19	g__	s__
634_1	3300017526_42	public genome	1	1	0	0	nothing_new_here	p__Chloroflexota	c__Dehalococcoidia	o__Dehalococcoidales	f__UBA5760	g__	s__
2297_0	3300017532_38	public genome	1	1	0	0	nothing_new_here	p__Chloroflexota	c__Anaerolineae	o__Thermoflexales	f__	g__	s__
1502_1	3300017548_15	public genome	2	2	0	0	nothing_new_here	p__Chloroflexota	c__Chloroflexia	o__Thermomicrobiales	f__	g__	s__
814_1	3300017560_12	public genome	2	2	0	0	nothing_new_here	p__Chloroflexota	c__Chloroflexia	o__Thermomicrobiales	f__UBA6265	g__	s__
1507_0	3300017653_13	public genome	1	1	0	0	nothing_new_here	p__Chloroflexota	c__Chloroflexia	o__Thermomicrobiales	f__	g__	s__
815_1	3300017653_17	public genome	2	2	0	0	nothing_new_here	p__Chloroflexota	c__Chloroflexia	o__Thermomicrobiales	f__UBA6265	g__	s__
1061_0	3300017929_23	public genome	1	1	0	0	nothing_new_here	p__Chloroflexota	c__Dehalococcoidia	o__SM23-28-2	f__	g__	s__
64_0	3300017932_4	public genome	1	1	0	0	nothing_new_here	p__Chloroflexota	c__Ktedonobacteria	o__Ktedonobacterales	f__Ktedonobacteraceae	g__UBA11361	s__
619_0	3300017971_108	public genome	1	1	0	0	nothing_new_here	p__Chloroflexota	c__Dehalococcoidia	o__Dehalococcoidales	f__UBA5627	g__	s__
663_4	3300017971_58	public genome	1	1	0	0	nothing_new_here	p__Chloroflexota	c__Dehalococcoidia	o__Dehalococcoidales	f__RBG-16-60-22	g__JdFR-56	s__
849_1	3300017971_63	public genome	1	1	0	0	nothing_new_here	p__Chloroflexota	c__Dehalococcoidia	o__	f__	g__	s__
923_3	3300017971_91	public genome	1	1	0	0	nothing_new_here	p__Chloroflexota	c__Dehalococcoidia	o__SZUA-161	f__	g__	s__
917_0	3300017989_46	public genome	1	1	0	0	nothing_new_here	p__Chloroflexota	c__Dehalococcoidia	o__SZUA-161	f__	g__	s__
2245_0	3300017990_27	public genome	1	1	0	0	nothing_new_here	p__Chloroflexota	c__Anaerolineae	o__	f__	g__	s__
579_1	3300017998_27	public genome	2	2	0	0	nothing_new_here	p__Chloroflexota	c__Dehalococcoidia	o__Dehalococcoidales	f__RBG-16-60-22	g__RBG-13-51-18	s__
2379_0	3300018018_16	public genome	1	1	0	0	nothing_new_here	p__Chloroflexota	c__Anaerolineae	o__Anaerolineales	f__Anaerolineaceae	g__UBA700	s__
2068_1	3300018065_21	public genome	2	2	0	0	nothing_new_here	p__Chloroflexota	c__Anaerolineae	o__4572-78	f__	g__	s__
594_0	3300018089_14	public genome	1	1	0	0	nothing_new_here	p__Chloroflexota	c__Dehalococcoidia	o__Dehalococcoidales	f__RBG-16-60-22	g__Fen-1077	s__
2004_0	3300018465_6	public genome	1	1	0	0	nothing_new_here	p__Chloroflexota	c__Anaerolineae	o__Anaerolineales	f__envOPS12	g__UBA12294	s__
868_0	3300018910_5	public genome	1	1	0	0	nothing_new_here	p__Chloroflexota	c__Chloroflexia	o__Chloroflexales	f__Herpetosiphonaceae	g__JKG1	s__
1472_0	3300018910_6	public genome	1	1	0	0	nothing_new_here	p__Chloroflexota	c__Chloroflexia	o__54-19	f__	g__	s__
894_0	3300019458_28	public genome	1	1	0	0	nothing_new_here	p__Chloroflexota	c__Dehalococcoidia	o__SM23-28-2	f__RBG-16-64-32	g__	s__
1018_0	3300019487_22	public genome	1	1	0	0	nothing_new_here	p__Chloroflexota	c__Dehalococcoidia	o__UBA1151	f__	g__	s__
2167_0	3300019487_26	public genome	1	1	0	0	nothing_new_here	p__Chloroflexota	c__Anaerolineae	o__Anaerolineales	f__envOPS12	g__UBA12294	s__
1647_1	3300020109_66	public genome	1	1	0	0	nothing_new_here	p__Chloroflexota	c__Dehalococcoidia	o__UBA2777	f__RBG-13-53-26	g__RBG-13-53-26	s__
952_2	3300020139_24	public genome	4	1	3	0	mostly_new_onlyMAGsSRA	p__Chloroflexota	c__Dehalococcoidia	o__UBA2991	f__UBA2991	g__HRBIN29	s__HRBIN29 sp002898215
900_1	3300020139_32	public genome	2	1	1	0	old+new_onlyMAGsSRA	p__Chloroflexota	c__Dehalococcoidia	o__SM23-28-2	f__HRbin24	g__HRBIN24	s__
2024_1	3300020153_15	public genome	2	1	1	0	old+new_onlyMAGsSRA	p__Chloroflexota	c__Anaerolineae	o__Caldilineales	f__	g__	s__
1119_1	3300020180_35	public genome	3	2	1	0	old+new_onlyMAGsSRA	p__Chloroflexota	c__Anaerolineae	o__SBR1031	f__A4b	g__GCA-2794515	s__
2244_1	3300020186_12	public genome	3	1	2	0	old+new_onlyMAGsSRA	p__Chloroflexota	c__Anaerolineae	o__Anaerolineales	f__UBA6663	g__	s__
958_1	3300020197_37	public genome	1	1	0	0	nothing_new_here	p__Chloroflexota	c__Dehalococcoidia	o__UBA3495	f__UBA3495	g__	s__
363_0	3300020202_7	public genome	1	1	0	0	nothing_new_here	p__Chloroflexota	c__Anaerolineae	o__Anaerolineales	f__envOPS12	g__	s__
2341_1	3300020214_33	public genome	2	2	0	0	nothing_new_here	p__Chloroflexota	c__Dehalococcoidia	o__UBA3495	f__GCA-2712585	g__	s__
937_0	3300020214_35	public genome	1	1	0	0	nothing_new_here	p__Chloroflexota	c__Dehalococcoidia	o__	f__	g__	s__
1152_1	3300020222_28	public genome	1	1	0	0	nothing_new_here	p__Chloroflexota	c__Anaerolineae	o__UBA4142	f__UBA4142	g__UBA4142	s__
663_11	3300020222_90	public genome	1	1	0	0	nothing_new_here	p__Chloroflexota	c__Dehalococcoidia	o__Dehalococcoidales	f__RBG-16-60-22	g__	s__
823_1	3300020364_6	public genome	3	3	0	0	nothing_new_here	p__Chloroflexota	c__Dehalococcoidia	o__SAR202	f__UBA11138	g__UBA2160	s__UBA2160 sp002328865
838_1	3300020373_44	public genome	4	4	0	0	nothing_new_here	p__Chloroflexota	c__Dehalococcoidia	o__UBA1151	f__Bin127	g__UBA1328	s__UBA1328 sp002501045
1100_1	3300020389_25	public genome	23	23	0	0	nothing_new_here	p__Chloroflexota	c__Dehalococcoidia	o__UBA3495	f__UBA3495	g__UBA9611	s__
1099_2	3300020412_5	public genome	2	2	0	0	nothing_new_here	p__Chloroflexota	c__Dehalococcoidia	o__UBA3495	f__UBA3495	g__UBA9611	s__UBA9611 sp002697005
609_1	3300020423_58	public genome	4	4	0	0	nothing_new_here	p__Chloroflexota	c__Dehalococcoidia	o__Dehalococcoidales	f__UBA2162	g__UBA2162	s__UBA2162 sp002335405
808_1	3300020460_50	public genome	1	1	0	0	nothing_new_here	p__Chloroflexota	c__Dehalococcoidia	o__SAR202	f__UBA2962	g__UBA2962	s__UBA2962 sp002728115
159_0	3300020476_55	public genome	1	1	0	0	nothing_new_here	p__Chloroflexota	c__Dehalococcoidia	o__UBA2991	f__UBA2991	g__UBA2991	s__
2541_0	3300020477_75	public genome	1	1	0	0	nothing_new_here	p__Chloroflexota	c__Dehalococcoidia	o__UBA2985	f__UBA2985	g__UBA2985	s__UBA2985 sp002717805
1863_0	3300021341_8	public genome	1	1	0	0	nothing_new_here	p__Chloroflexota	c__Anaerolineae	o__SBR1031	f__A4b	g__GCA-2699585	s__
1765_0	3300021376_39	public genome	1	1	0	0	nothing_new_here	p__Chloroflexota	c__Chloroflexia	o__Chloroflexales	f__Roseiflexaceae	g__UBA965	s__
1544_0	3300021504_12	public genome	1	1	0	0	nothing_new_here	p__Chloroflexota	c__Anaerolineae	o__Anaerolineales	f__UBA11858	g__	s__
1834_1	3300021507_3	public genome	3	3	0	0	nothing_new_here	p__Chloroflexota	c__Anaerolineae	o__	f__	g__	s__
2152_6	3300021517_12	public genome	1	1	0	0	nothing_new_here	p__Chloroflexota	c__Anaerolineae	o__Anaerolineales	f__envOPS12	g__OLB14	s__
1861_0	3300021517_18	public genome	1	1	0	0	nothing_new_here	p__Chloroflexota	c__Anaerolineae	o__SBR1031	f__A4b	g__OLB15	s__
1915_0	3300021518_12	public genome	1	1	0	0	nothing_new_here	p__Chloroflexota	c__Anaerolineae	o__SBR1031	f__A4b	g__OLB15	s__
1908_0	3300021518_15	public genome	1	1	0	0	nothing_new_here	p__Chloroflexota	c__Anaerolineae	o__SBR1031	f__A4b	g__GCA-2699585	s__
1802_0	3300021604_23	public genome	1	1	0	0	nothing_new_here	p__Chloroflexota	c__Anaerolineae	o__SBR1031	f__UBA3940	g__	s__
263_1	3300022177_37	public genome	6	3	3	0	old+new_onlyMAGsSRA	p__Chloroflexota	c__Anaerolineae	o__Anaerolineales	f__Anaerolineaceae	g__49-20	s__
300_4	3300022181_37	public genome	1	1	0	0	nothing_new_here	p__Chloroflexota	c__Anaerolineae	o__Anaerolineales	f__Anaerolineaceae	g__T78	s__T78 sp002432795
222_0	3300022225_35	public genome	1	1	0	0	nothing_new_here	p__Chloroflexota	c__Dehalococcoidia	o__SZUA-161	f__	g__	s__
1766_1	3300022752_27	public genome	2	2	0	0	nothing_new_here	p__Chloroflexota	c__Chloroflexia	o__Chloroflexales	f__Roseiflexaceae	g__UBA965	s__
880_1	3300022916_16	public genome	2	2	0	0	nothing_new_here	p__Chloroflexota	c__Dehalococcoidia	o__SZUA-161	f__	g__	s__
769_0	3300023176_30	public genome	1	1	0	0	nothing_new_here	p__Chloroflexota	c__Dehalococcoidia	o__UBA1151	f__Bin127	g__	s__
1720_1	3300023177_12	public genome	1	1	0	0	nothing_new_here	p__Chloroflexota	c__UBA6077	o__	f__	g__	s__
932_2	3300023208_12	public genome	1	1	0	0	nothing_new_here	p__Chloroflexota	c__UBA2235	o__UBA12225	f__UBA12225	g__UBA12225	s__
2081_2	3300023208_13	public genome	1	1	0	0	nothing_new_here	p__Chloroflexota	c__Anaerolineae	o__Anaerolineales	f__UBA11657	g__	s__
492_2	3300024240_6	public genome	2	2	0	0	nothing_new_here	p__Chloroflexota	c__Dehalococcoidia	o__Dehalococcoidales	f__UBA3254	g__Fen-1064	s__
2083_1	3300024259_11	public genome	2	2	0	0	nothing_new_here	p__Chloroflexota	c__Anaerolineae	o__Anaerolineales	f__UBA11858	g__	s__
549_1	3300024262_27	public genome	3	3	0	0	nothing_new_here	p__Chloroflexota	c__Dehalococcoidia	o__Dehalococcoidales	f__UBA5760	g__	s__
685_2	3300024333_14	public genome	1	1	0	0	nothing_new_here	p__Chloroflexota	c__Dehalococcoidia	o__GIF9	f__UBA5620	g__9FT-COMBO-48-23	s__
435_1	3300024353_26	public genome	1	1	0	0	nothing_new_here	p__Chloroflexota	c__Dehalococcoidia	o__UBA2777	f__RBG-13-53-26	g__	s__
1746_6	3300024353_34	public genome	1	1	0	0	nothing_new_here	p__Chloroflexota	c__Anaerolineae	o__UBA7937	f__UBA7937	g__UBA7937	s__
1746_3	3300024353_39	public genome	2	1	1	0	old+new_onlyMAGsSRA	p__Chloroflexota	c__Anaerolineae	o__UBA7937	f__UBA7937	g__UBA7937	s__
1723_10	3300024353_42	public genome	4	2	2	0	old+new_onlyMAGsSRA	p__Chloroflexota	c__Anaerolineae	o__UBA7937	f__	g__	s__
924_3	3300024353_43	public genome	1	1	0	0	nothing_new_here	p__Chloroflexota	c__Dehalococcoidia	o__	f__	g__	s__
693_2	3300024353_49	public genome	1	1	0	0	nothing_new_here	p__Chloroflexota	c__Dehalococcoidia	o__GIF9	f__AB-539-J10	g__RBG-13-51-36	s__
924_1	3300024353_52	public genome	1	1	0	0	nothing_new_here	p__Chloroflexota	c__Dehalococcoidia	o__	f__	g__	s__
1021_10	3300024353_62	public genome	1	1	0	0	nothing_new_here	p__Chloroflexota	c__Dehalococcoidia	o__SM23-28-2	f__SM23-28-2	g__SM23-28-2	s__
649_4	3300024353_70	public genome	1	1	0	0	nothing_new_here	p__Chloroflexota	c__Dehalococcoidia	o__Dehalococcoidales	f__UBA5760	g__	s__
640_0	3300024353_83	public genome	1	1	0	0	nothing_new_here	p__Chloroflexota	c__Dehalococcoidia	o__Dehalococcoidales	f__UBA5760	g__	s__
2150_0	3300024430_5	public genome	1	1	0	0	nothing_new_here	p__Chloroflexota	c__Anaerolineae	o__Anaerolineales	f__envOPS12	g__UBA12294	s__
256_1	3300024433_17	public genome	1	1	0	0	nothing_new_here	p__Chloroflexota	c__Anaerolineae	o__Anaerolineales	f__	g__	s__
698_1	3300024433_67	public genome	2	1	1	0	old+new_onlyMAGsSRA	p__Chloroflexota	c__Dehalococcoidia	o__GIF9	f__AB-539-J10	g__RBG-13-51-36	s__
2257_1	3300025161_40	public genome	2	1	1	0	old+new_onlyMAGsSRA	p__Chloroflexota	c__Anaerolineae	o__Anaerolineales	f__envOPS12	g__	s__
900_2	3300025350_18	public genome	2	2	0	0	nothing_new_here	p__Chloroflexota	c__Dehalococcoidia	o__SM23-28-2	f__HRbin24	g__HRBIN24	s__
561_0	3300025364_5	public genome	1	1	0	0	nothing_new_here	p__Chloroflexota	c__Anaerolineae	o__SBR1031	f__A4b	g__GCA-2699585	s__
1592_6	3300025455_1	public genome	1	1	0	0	nothing_new_here	p__Chloroflexota	c__Chloroflexia	o__Chloroflexales	f__Chloroflexaceae	g__Oscillochloris	s__
2224_1	3300025469_11	public genome	2	2	0	0	nothing_new_here	p__Chloroflexota	c__Anaerolineae	o__Anaerolineales	f__envOPS12	g__UBA877	s__
2362_1	3300025476_12	public genome	1	1	0	0	nothing_new_here	p__Chloroflexota	c__Dehalococcoidia	o__Dehalococcoidales	f__UBA5627	g__	s__
1637_0	3300025477_8	public genome	1	1	0	0	nothing_new_here	p__Chloroflexota	c__Anaerolineae	o__Anaerolineales	f__RBG-16-64-43	g__	s__
1389_2	3300025481_13	public genome	2	2	0	0	nothing_new_here	p__Chloroflexota	c__Ellin6529	o__CSP1-4	f__CSP1-4	g__	s__
2005_0	3300025503_12	public genome	1	1	0	0	nothing_new_here	p__Chloroflexota	c__Ktedonobacteria	o__Ktedonobacterales	f__	g__	s__
1464_0	3300025503_22	public genome	1	1	0	0	nothing_new_here	p__Dormibacterota	c__Dormibacteria	o__UBA8260	f__Bog-877	g__	s__
325_0	3300025503_35	public genome	1	1	0	0	nothing_new_here	p__Dormibacterota	c__Dormibacteria	o__Dormibacterales	f__	g__	s__
1508_0	3300025503_4	public genome	1	1	0	0	nothing_new_here	p__Chloroflexota	c__UBA6077	o__	f__	g__	s__
334_0	3300025515_4	public genome	1	1	0	0	nothing_new_here	p__Chloroflexota	c__Anaerolineae	o__Anaerolineales	f__Anaerolineaceae	g__Bellilinea	s__
2174_1	3300025525_13	public genome	1	1	0	0	nothing_new_here	p__Chloroflexota	c__Anaerolineae	o__Anaerolineales	f__envOPS12	g__OLB14	s__
2262_2	3300025525_6	public genome	1	1	0	0	nothing_new_here	p__Chloroflexota	c__Anaerolineae	o__Anaerolineales	f__envOPS12	g__UBA8950	s__
1552_0	3300025571_8	public genome	1	1	0	0	nothing_new_here	p__Chloroflexota	c__Chloroflexia	o__Chloroflexales	f__Roseiflexaceae	g__Kouleothrix	s__
852_1	3300025597_6	public genome	4	3	1	0	mostly_old	p__Chloroflexota	c__Anaerolineae	o__	f__	g__	s__
759_1	3300025628_32	public genome	1	1	0	0	nothing_new_here	p__Chloroflexota	c__Dehalococcoidia	o__Dehalococcoidales	f__UBA5760	g__UBA5760	s__
201_2	3300025649_12	public genome	1	1	0	0	nothing_new_here	p__Chloroflexota	c__Anaerolineae	o__Anaerolineales	f__UBA11858	g__	s__
1247_4	3300025649_3	public genome	1	1	0	0	nothing_new_here	p__Chloroflexota	c__Anaerolineae	o__	f__	g__	s__
1424_1	3300025664_15	public genome	2	2	0	0	nothing_new_here	p__Dormibacterota	c__Dormibacteria	o__Dormibacterales	f__Dormibacteraceae	g__Palsa-872	s__Palsa-872 sp003139695
353_1	3300025682_56	public genome	3	2	1	0	old+new_onlyMAGsSRA	p__Chloroflexota	c__Anaerolineae	o__Anaerolineales	f__Anaerolineaceae	g__UBA6107	s__
2508_1	3300025702_24	public genome	7	5	2	0	mostly_old	p__Chloroflexota	c__Anaerolineae	o__Anaerolineales	f__Anaerolineaceae	g__Flexilinea	s__
852_2	3300025708_15	public genome	2	2	0	0	nothing_new_here	p__Chloroflexota	c__Anaerolineae	o__	f__	g__	s__
2222_1	3300025716_7	public genome	3	3	0	0	nothing_new_here	p__Chloroflexota	c__Anaerolineae	o__Anaerolineales	f__envOPS12	g__UBA877	s__
1616_1	3300025717_5	public genome	2	1	1	0	old+new_onlyMAGsSRA	p__Chloroflexota	c__Chloroflexia	o__Chloroflexales	f__Chloroflexaceae	g__	s__
1854_8	3300025720_1	public genome	1	1	0	0	nothing_new_here	p__Chloroflexota	c__Anaerolineae	o__	f__	g__	s__
1852_2	3300025720_6	public genome	1	1	0	0	nothing_new_here	p__Chloroflexota	c__Anaerolineae	o__	f__	g__	s__
1853_0	3300025724_5	public genome	1	1	0	0	nothing_new_here	p__Chloroflexota	c__Anaerolineae	o__	f__	g__	s__
290_1	3300025739_29	public genome	1	1	0	0	nothing_new_here	p__Chloroflexota	c__Anaerolineae	o__Anaerolineales	f__Anaerolineaceae	g__T78	s__
738_1	3300025750_15	public genome	3	3	0	0	nothing_new_here	p__Chloroflexota	c__UBA6077	o__UBA6077	f__UBA6077	g__	s__
2123_1	3300025775_3	public genome	2	1	1	0	old+new_onlyMAGsSRA	p__Chloroflexota	c__UBA2235	o__	f__	g__	s__
1375_1	3300025812_11	public genome	1	1	0	0	nothing_new_here	p__Chloroflexota	c__Ellin6529	o__CSP1-4	f__CSP1-4	g__Fen-1039	s__
489_1	3300025812_16	public genome	2	2	0	0	nothing_new_here	p__Chloroflexota	c__Dehalococcoidia	o__GIF9	f__UBA5629	g__UBA1162	s__UBA1162 sp002311135
290_2	3300025846_15	public genome	1	1	0	0	nothing_new_here	p__Chloroflexota	c__Anaerolineae	o__Anaerolineales	f__Anaerolineaceae	g__T78	s__
2120_0	3300025854_1	public genome	1	1	0	0	nothing_new_here	p__Chloroflexota	c__Chloroflexia	o__Thermomicrobiales	f__UBA6265	g__	s__
2221_1	3300025857_12	public genome	2	2	0	0	nothing_new_here	p__Chloroflexota	c__Anaerolineae	o__Anaerolineales	f__envOPS12	g__UBA877	s__
2164_3	3300025859_13	public genome	1	1	0	0	nothing_new_here	p__Chloroflexota	c__Anaerolineae	o__Anaerolineales	f__envOPS12	g__UBA12294	s__
1717_0	3300025861_10	public genome	1	1	0	0	nothing_new_here	p__Chloroflexota	c__Anaerolineae	o__	f__	g__	s__
1857_1	3300025861_11	public genome	1	1	0	0	nothing_new_here	p__Chloroflexota	c__Anaerolineae	o__	f__	g__	s__
1798_1	3300025861_8	public genome	1	1	0	0	nothing_new_here	p__Chloroflexota	c__Anaerolineae	o__	f__	g__	s__
2057_0	3300025882_14	public genome	1	1	0	0	nothing_new_here	p__Chloroflexota	c__Anaerolineae	o__Anaerolineales	f__Anaerolineaceae	g__UBA700	s__
57_1	3300025910_29	public genome	3	2	1	0	old+new_onlyMAGsSRA	p__Chloroflexota	c__Ktedonobacteria	o__Ktedonobacterales	f__Ktedonobacteraceae	g__UBA11361	s__
56_5	3300025910_30	public genome	1	1	0	0	nothing_new_here	p__Chloroflexota	c__Ktedonobacteria	o__Ktedonobacterales	f__Ktedonobacteraceae	g__UBA11361	s__
2130_1	3300025929_21	public genome	2	2	0	0	nothing_new_here	p__Chloroflexota	c__Ktedonobacteria	o__Ktedonobacterales	f__	g__	s__
1533_0	3300026007_2	public genome	1	1	0	0	nothing_new_here	p__Chloroflexota	c__Anaerolineae	o__4572-78	f__	g__	s__
2205_0	3300026019_1	public genome	1	1	0	0	nothing_new_here	p__Chloroflexota	c__Anaerolineae	o__Anaerolineales	f__envOPS12	g__Fen-1038	s__
822_1	3300026087_6	public genome	21	21	0	0	nothing_new_here	p__Chloroflexota	c__Dehalococcoidia	o__SAR202	f__UBA11138	g__UBA1123	s__UBA1123 sp002313895
46_0	3300026116_23	public genome	1	1	0	0	nothing_new_here	p__Chloroflexota	c__Ktedonobacteria	o__Ktedonobacterales	f__Ktedonobacteraceae	g__UBA11361	s__
209_1	3300026267_19	public genome	5	5	0	0	nothing_new_here	p__Chloroflexota	c__Anaerolineae	o__Anaerolineales	f__UBA11657	g__	s__
1151_3	3300026278_10	public genome	3	1	2	0	old+new_onlyMAGsSRA	p__Chloroflexota	c__Anaerolineae	o__UBA4142	f__UBA4142	g__UBA4142	s__
1919_1	3300026278_8	public genome	2	1	1	0	old+new_onlyMAGsSRA	p__Chloroflexota	c__Anaerolineae	o__SBR1031	f__	g__	s__
286_2	3300026290_59	public genome	1	1	0	0	nothing_new_here	p__Chloroflexota	c__Anaerolineae	o__Anaerolineales	f__Anaerolineaceae	g__T78	s__
1450_1	3300026291_14	public genome	2	2	0	0	nothing_new_here	p__Dormibacterota	c__Dormibacteria	o__UBA8260	f__UBA8260	g__Palsa-875	s__
1255_1	3300026293_8	public genome	2	1	1	0	old+new_onlyMAGsSRA	p__Chloroflexota	c__Anaerolineae	o__	f__	g__	s__
47_1	3300026294_5	public genome	1	1	0	0	nothing_new_here	p__Chloroflexota	c__Ktedonobacteria	o__Ktedonobacterales	f__Ktedonobacteraceae	g__	s__
1798_3	3300026516_16	public genome	1	1	0	0	nothing_new_here	p__Chloroflexota	c__Anaerolineae	o__UBA3071	f__	g__	s__
1790_3	3300026519_14	public genome	1	1	0	0	nothing_new_here	p__Chloroflexota	c__Anaerolineae	o__Caldilineales	f__Caldilineaceae	g__	s__
554_3	3300026519_21	public genome	1	1	0	0	nothing_new_here	p__Chloroflexota	c__Anaerolineae	o__Ardenticatenales	f__Ardenticatenaceae	g__	s__
1254_1	3300026531_27	public genome	1	1	0	0	nothing_new_here	p__Chloroflexota	c__Anaerolineae	o__	f__	g__	s__
1790_1	3300026534_11	public genome	1	1	0	0	nothing_new_here	p__Chloroflexota	c__Anaerolineae	o__Caldilineales	f__Caldilineaceae	g__	s__
1676_0	3300026534_25	public genome	1	1	0	0	nothing_new_here	p__Chloroflexota	c__Anaerolineae	o__SBR1031	f__	g__	s__
1881_0	3300026534_35	public genome	1	1	0	0	nothing_new_here	p__Chloroflexota	c__Anaerolineae	o__SBR1031	f__UBA2029	g__	s__
550_0	3300027051_22	public genome	1	1	0	0	nothing_new_here	p__Chloroflexota	c__Dehalococcoidia	o__Dehalococcoidales	f__RBG-16-60-22	g__	s__
1291_2	3300027284_22	public genome	2	2	0	0	nothing_new_here	p__Chloroflexota	c__Dehalococcoidia	o__UBA2979	f__UBA2979	g__	s__
1506_1	3300027316_2	public genome	2	1	1	0	old+new_onlyMAGsSRA	p__Chloroflexota	c__Chloroflexia	o__Thermomicrobiales	f__Thermomicrobiaceae	g__Sphaerobacter	s__
369_0	3300027373_22	public genome	1	1	0	0	nothing_new_here	p__Chloroflexota	c__Anaerolineae	o__Anaerolineales	f__envOPS12	g__UBA5195	s__
2007_1	3300027509_6	public genome	2	2	0	0	nothing_new_here	p__Chloroflexota	c__Anaerolineae	o__Caldilineales	f__Caldilineaceae	g__	s__
1734_1	3300027515_19	public genome	2	1	1	0	old+new_onlyMAGsSRA	p__Chloroflexota	c__Anaerolineae	o__	f__	g__	s__
1151_2	3300027515_21	public genome	2	1	1	0	old+new_onlyMAGsSRA	p__Chloroflexota	c__Anaerolineae	o__UBA4142	f__UBA4142	g__	s__
1240_1	3300027532_23	public genome	2	1	1	0	old+new_onlyMAGsSRA	p__Chloroflexota	c__Dehalococcoidia	o__Bin125	f__Bin125	g__Bin125	s__Bin125 sp002239025
1649_0	3300027555_11	public genome	1	1	0	0	nothing_new_here	p__Chloroflexota	c__Dehalococcoidia	o__UBA2777	f__RBG-13-53-26	g__	s__
1463_0	3300027565_3	public genome	1	1	0	0	nothing_new_here	p__Dormibacterota	c__Dormibacteria	o__UBA8260	f__UBA8260	g__Palsa-851	s__
1462_8	3300027570_11	public genome	1	1	0	0	nothing_new_here	p__Dormibacterota	c__Dormibacteria	o__UBA8260	f__UBA8260	g__Palsa-851	s__
1885_1	3300027592_14	public genome	3	3	0	0	nothing_new_here	p__Chloroflexota	c__Anaerolineae	o__SBR1031	f__UBA2029	g__	s__
787_0	3300027592_45	public genome	1	1	0	0	nothing_new_here	p__Chloroflexota	c__Anaerolineae	o__UBA1429	f__UBA1429	g__UBA1429	s__
827_1	3300027592_58	public genome	1	1	0	0	nothing_new_here	p__Chloroflexota	c__Dehalococcoidia	o__Dehalococcoidales	f__UBA5627	g__	s__
827_3	3300027592_60	public genome	1	1	0	0	nothing_new_here	p__Chloroflexota	c__Dehalococcoidia	o__Dehalococcoidales	f__UBA5627	g__	s__
56_4	3300027604_6	public genome	1	1	0	0	nothing_new_here	p__Chloroflexota	c__Ktedonobacteria	o__Ktedonobacterales	f__Ktedonobacteraceae	g__UBA11361	s__
2515_0	3300027607_11	public genome	1	1	0	0	nothing_new_here	p__Chloroflexota	c__Anaerolineae	o__SBR1031	f__A4b	g__UBA6055	s__
408_0	3300027607_19	public genome	1	1	0	0	nothing_new_here	p__Chloroflexota	c__Anaerolineae	o__SBR1031	f__	g__	s__
1536_0	3300027607_36	public genome	1	1	0	0	nothing_new_here	p__Chloroflexota	c__Anaerolineae	o__SBR1031	f__A4b	g__	s__
1347_1	3300027638_9	public genome	1	1	0	0	nothing_new_here	p__Chloroflexota	c__Ellin6529	o__QHBO01	f__QHBO01	g__	s__
1423_3	3300027645_7	public genome	1	1	0	0	nothing_new_here	p__Dormibacterota	c__Dormibacteria	o__Dormibacterales	f__Dormibacteraceae	g__UBA10449	s__
1101_2	3300027677_20	public genome	1	1	0	0	nothing_new_here	p__Chloroflexota	c__Dehalococcoidia	o__UBA3495	f__UBA3495	g__UBA9611	s__
831_3	3300027685_16	public genome	2	2	0	0	nothing_new_here	p__Chloroflexota	c__Dehalococcoidia	o__UBA1151	f__UBA1151	g__GCA-2730555	s__
80_3	3300027688_34	public genome	2	2	0	0	nothing_new_here	p__Chloroflexota	c__Ellin6529	o__CSP1-4	f__UBA10416	g__UBA10416	s__
1777_0	3300027690_53	public genome	1	1	0	0	nothing_new_here	p__Chloroflexota	c__Anaerolineae	o__Anaerolineales	f__UBA11579	g__	s__
693_9	3300027690_70	public genome	1	1	0	0	nothing_new_here	p__Chloroflexota	c__Dehalococcoidia	o__GIF9	f__AB-539-J10	g__RBG-13-51-36	s__
24_0	3300027706_11	public genome	1	1	0	0	nothing_new_here	p__Chloroflexota	c__Ktedonobacteria	o__Ktedonobacterales	f__	g__	s__
1198_0	3300027706_17	public genome	1	1	0	0	nothing_new_here	p__Chloroflexota	c__Ktedonobacteria	o__Ktedonobacterales	f__	g__	s__
982_1	3300027709_15	public genome	2	2	0	0	nothing_new_here	p__Chloroflexota	c__Dehalococcoidia	o__SAR202	f__UBA826	g__UBA11996	s__UBA11996 sp002500485
2109_1	3300027726_3	public genome	2	2	0	0	nothing_new_here	p__Chloroflexota	c__Anaerolineae	o__Anaerolineales	f__envOPS12	g__UBA877	s__
1746_7	3300027742_28	public genome	1	1	0	0	nothing_new_here	p__Chloroflexota	c__Anaerolineae	o__UBA7937	f__UBA7937	g__UBA7937	s__UBA7937 sp002366595
1611_1	3300027743_12	public genome	1	1	0	0	nothing_new_here	p__Chloroflexota	c__Anaerolineae	o__Anaerolineales	f__RBG-16-64-43	g__FEN-1073	s__
931_1	3300027760_13	public genome	28	27	1	0	mostly_old	p__Chloroflexota	c__UBA2235	o__UBA12225	f__UBA12225	g__UBA12225	s__UBA12225 sp002347925
2284_0	3300027773_21	public genome	1	1	0	0	nothing_new_here	p__Chloroflexota	c__UBA5177	o__	f__	g__	s__
1600_0	3300027773_37	public genome	1	1	0	0	nothing_new_here	p__Chloroflexota	c__UBA5177	o__UBA5177	f__	g__	s__
82_11	3300027777_60	public genome	1	1	0	0	nothing_new_here	p__Chloroflexota	c__Ellin6529	o__CSP1-4	f__UBA10416	g__UBA10416	s__
1767_0	3300027793_42	public genome	1	1	0	0	nothing_new_here	p__Chloroflexota	c__Chloroflexia	o__Chloroflexales	f__Roseiflexaceae	g__UBA965	s__
1016_0	3300027815_20	public genome	1	1	0	0	nothing_new_here	p__Chloroflexota	c__Dehalococcoidia	o__	f__	g__	s__
1650_1	3300027815_38	public genome	1	1	0	0	nothing_new_here	p__Chloroflexota	c__Dehalococcoidia	o__	f__	g__	s__
1010_0	3300027819_23	public genome	1	1	0	0	nothing_new_here	p__Chloroflexota	c__Dehalococcoidia	o__	f__	g__	s__
760_0	3300027819_31	public genome	1	1	0	0	nothing_new_here	p__Chloroflexota	c__Dehalococcoidia	o__GIF9	f__	g__	s__
1034_0	3300027819_33	public genome	1	1	0	0	nothing_new_here	p__Chloroflexota	c__Dehalococcoidia	o__	f__	g__	s__
2165_2	3300027819_37	public genome	1	1	0	0	nothing_new_here	p__Chloroflexota	c__Anaerolineae	o__Anaerolineales	f__envOPS12	g__OLB14	s__
1051_1	3300027819_39	public genome	1	1	0	0	nothing_new_here	p__Chloroflexota	c__Dehalococcoidia	o__UBA6952	f__	g__	s__
790_0	3300027819_40	public genome	1	1	0	0	nothing_new_here	p__Chloroflexota	c__Dehalococcoidia	o__JdFR-54	f__	g__	s__
969_1	3300027819_59	public genome	1	1	0	0	nothing_new_here	p__Chloroflexota	c__Dehalococcoidia	o__Dehalococcoidales	f__UBA2162	g__	s__
776_0	3300027819_65	public genome	1	1	0	0	nothing_new_here	p__Chloroflexota	c__Dehalococcoidia	o__JdFR-54	f__	g__	s__
1049_0	3300027819_66	public genome	1	1	0	0	nothing_new_here	p__Chloroflexota	c__Dehalococcoidia	o__	f__	g__	s__
2048_2	3300027819_71	public genome	1	1	0	0	nothing_new_here	p__Chloroflexota	c__Anaerolineae	o__Anaerolineales	f__UBA6663	g__	s__
1656_0	3300027822_67	public genome	1	1	0	0	nothing_new_here	p__Chloroflexota	c__Dehalococcoidia	o__UBA3088	f__UBA3088	g__UBA3088	s__UBA3088 sp002367275
2216_2	3300027825_12	public genome	1	1	0	0	nothing_new_here	p__Chloroflexota	c__Anaerolineae	o__Anaerolineales	f__envOPS12	g__Fen-1038	s__
2226_0	3300027825_13	public genome	1	1	0	0	nothing_new_here	p__Chloroflexota	c__Anaerolineae	o__Anaerolineales	f__envOPS12	g__UBA877	s__
2514_1	3300027828_20	public genome	2	2	0	0	nothing_new_here	p__Chloroflexota	c__Anaerolineae	o__SBR1031	f__A4b	g__UBA6055	s__
202_0	3300027834_65	public genome	1	1	0	0	nothing_new_here	p__Chloroflexota	c__Anaerolineae	o__Anaerolineales	f__UBA11858	g__	s__
934_1	3300027835_58	public genome	1	1	0	0	nothing_new_here	p__Chloroflexota	c__Dehalococcoidia	o__GCA-2717565	f__	g__	s__
831_4	3300027838_84	public genome	1	1	0	0	nothing_new_here	p__Chloroflexota	c__Dehalococcoidia	o__UBA1151	f__UBA1151	g__GCA-2730555	s__
998_1	3300027839_39	public genome	1	1	0	0	nothing_new_here	p__Chloroflexota	c__Dehalococcoidia	o__SAR202	f__UBA11138	g__Casp-Chloro-G4	s__
966_1	3300027839_47	public genome	2	2	0	0	nothing_new_here	p__Chloroflexota	c__Dehalococcoidia	o__SAR202	f__	g__	s__
1431_0	3300027842_12	public genome	1	1	0	0	nothing_new_here	p__Dormibacterota	c__Dormibacteria	o__Dormibacterales	f__Dormibacteraceae	g__Palsa-870	s__
1101_3	3300027844_27	public genome	1	1	0	0	nothing_new_here	p__Chloroflexota	c__Dehalococcoidia	o__UBA3495	f__UBA3495	g__UBA9611	s__
1662_1	3300027844_33	public genome	2	2	0	0	nothing_new_here	p__Chloroflexota	c__Dehalococcoidia	o__UBA1151	f__UBA1151	g__UBA1151	s__
813_0	3300027844_41	public genome	1	1	0	0	nothing_new_here	p__Chloroflexota	c__Dehalococcoidia	o__SAR202	f__	g__	s__
1009_1	3300027844_54	public genome	1	1	0	0	nothing_new_here	p__Chloroflexota	c__Dehalococcoidia	o__UBA1127	f__UBA1127	g__UBA1127	s__
625_0	3300027844_59	public genome	1	1	0	0	nothing_new_here	p__Chloroflexota	c__Dehalococcoidia	o__SAR202	f__UBA2962	g__	s__
2543_0	3300027844_96	public genome	1	1	0	0	nothing_new_here	p__Chloroflexota	c__Dehalococcoidia	o__UBA2985	f__UBA2985	g__UBA2985	s__
833_1	3300027847_33	public genome	1	1	0	0	nothing_new_here	p__Chloroflexota	c__Dehalococcoidia	o__UBA1151	f__Bin127	g__	s__
835_0	3300027847_49	public genome	1	1	0	0	nothing_new_here	p__Chloroflexota	c__Dehalococcoidia	o__UBA1151	f__Bin127	g__	s__
1097_2	3300027847_50	public genome	1	1	0	0	nothing_new_here	p__Chloroflexota	c__Dehalococcoidia	o__UBA3495	f__UBA3495	g__UBA9611	s__
982_5	3300027847_53	public genome	1	1	0	0	nothing_new_here	p__Chloroflexota	c__Dehalococcoidia	o__SAR202	f__UBA826	g__UBA11996	s__UBA11996 sp003228105
1234_0	3300027847_58	public genome	1	1	0	0	nothing_new_here	p__Chloroflexota	c__UBA11872	o__UBA11872	f__	g__	s__
160_0	3300027847_70	public genome	1	1	0	0	nothing_new_here	p__Chloroflexota	c__Dehalococcoidia	o__UBA2991	f__UBA2991	g__UBA2991	s__
1041_0	3300027847_85	public genome	1	1	0	0	nothing_new_here	p__Chloroflexota	c__Dehalococcoidia	o__UBA2985	f__UBA2985	g__	s__
2328_1	3300027850_14	public genome	5	3	2	0	old+new_onlyMAGsSRA	p__Chloroflexota	c__Anaerolineae	o__Caldilineales	f__Caldilineaceae	g__	s__
2194_0	3300027851_42	public genome	1	1	0	0	nothing_new_here	p__Chloroflexota	c__Anaerolineae	o__Anaerolineales	f__envOPS12	g__OLB14	s__
25_0	3300027857_22	public genome	1	1	0	0	nothing_new_here	p__Chloroflexota	c__Ktedonobacteria	o__Ktedonobacterales	f__	g__	s__
1714_0	3300027858_14	public genome	1	1	0	0	nothing_new_here	p__Chloroflexota	c__Anaerolineae	o__	f__	g__	s__
1355_0	3300027858_28	public genome	1	1	0	0	nothing_new_here	p__Chloroflexota	c__Ellin6529	o__CSP1-4	f__CSP1-4	g__Palsa-1032	s__
498_1	3300027863_158	public genome	2	1	1	0	old+new_onlyMAGsSRA	p__Chloroflexota	c__Dehalococcoidia	o__GIF9	f__AB-539-J10	g__RBG-13-51-36	s__
171_1	3300027863_94	public genome	4	1	3	0	mostly_new_onlyMAGsSRA	p__Chloroflexota	c__Anaerolineae	o__Anaerolineales	f__UBA4823	g__UBA4823	s__
598_2	3300027868_11	public genome	1	1	0	0	nothing_new_here	p__Chloroflexota	c__Dehalococcoidia	o__Dehalococcoidales	f__RBG-16-60-22	g__	s__
2195_2	3300027878_55	public genome	1	1	0	0	nothing_new_here	p__Chloroflexota	c__Anaerolineae	o__Anaerolineales	f__envOPS12	g__OLB14	s__
2329_1	3300027878_69	public genome	3	3	0	0	nothing_new_here	p__Chloroflexota	c__Anaerolineae	o__Caldilineales	f__Caldilineaceae	g__	s__
672_1	3300027881_22	public genome	2	2	0	0	nothing_new_here	p__Chloroflexota	c__Dehalococcoidia	o__GIF9	f__AB-539-J10	g__RBG-13-51-36	s__
2080_1	3300027887_13	public genome	1	1	0	0	nothing_new_here	p__Chloroflexota	c__Anaerolineae	o__Thermoflexales	f__Fen-1058	g__Fen-1058	s__
585_1	3300027888_39	public genome	2	1	1	0	old+new_onlyMAGsSRA	p__Chloroflexota	c__Dehalococcoidia	o__Dehalococcoidales	f__RBG-16-60-22	g__	s__
713_1	3300027888_66	public genome	3	2	1	0	old+new_onlyMAGsSRA	p__Chloroflexota	c__Dehalococcoidia	o__GIF9	f__AB-539-J10	g__20-14-all-45-10	s__
639_3	3300027893_135	public genome	1	1	0	0	nothing_new_here	p__Chloroflexota	c__Dehalococcoidia	o__Dehalococcoidales	f__UBA5760	g__	s__
96_0	3300027894_10	public genome	1	1	0	0	nothing_new_here	p__Chloroflexota	c__Anaerolineae	o__Thermoflexales	f__	g__	s__
494_0	3300027896_43	public genome	1	1	0	0	nothing_new_here	p__Chloroflexota	c__Dehalococcoidia	o__Dehalococcoidales	f__UBA3254	g__	s__
2222_4	3300027896_56	public genome	1	1	0	0	nothing_new_here	p__Chloroflexota	c__Anaerolineae	o__Anaerolineales	f__envOPS12	g__UBA877	s__
2223_0	3300027896_81	public genome	1	1	0	0	nothing_new_here	p__Chloroflexota	c__Anaerolineae	o__Anaerolineales	f__envOPS12	g__UBA877	s__
229_0	3300027897_40	public genome	1	1	0	0	nothing_new_here	p__Chloroflexota	c__Anaerolineae	o__Anaerolineales	f__UBA6092	g__45689	s__
1439_0	3300027897_59	public genome	1	1	0	0	nothing_new_here	p__Chloroflexota	c__Anaerolineae	o__Anaerolineales	f__	g__	s__
1645_2	3300027900_49	public genome	1	1	0	0	nothing_new_here	p__Chloroflexota	c__Dehalococcoidia	o__UBA2777	f__RBG-13-53-26	g__	s__
692_1	3300027900_90	public genome	1	1	0	0	nothing_new_here	p__Chloroflexota	c__Dehalococcoidia	o__GIF9	f__AB-539-J10	g__RBG-13-51-36	s__
2361_0	3300027904_46	public genome	1	1	0	0	nothing_new_here	p__Chloroflexota	c__Dehalococcoidia	o__Dehalococcoidales	f__UBA5627	g__	s__
449_0	3300027904_65	public genome	1	1	0	0	nothing_new_here	p__Chloroflexota	c__Dehalococcoidia	o__Dehalococcoidales	f__UBA5627	g__	s__
797_0	3300027904_87	public genome	1	1	0	0	nothing_new_here	p__Chloroflexota	c__Dehalococcoidia	o__Dehalococcoidales	f__	g__	s__
2037_0	3300027909_24	public genome	1	1	0	0	nothing_new_here	p__Chloroflexota	c__Anaerolineae	o__Anaerolineales	f__UBA6663	g__	s__
1801_0	3300027909_33	public genome	1	1	0	0	nothing_new_here	p__Chloroflexota	c__Anaerolineae	o__SBR1031	f__UBA3940	g__	s__
691_1	3300027917_156	public genome	3	2	1	0	old+new_onlyMAGsSRA	p__Chloroflexota	c__Dehalococcoidia	o__GIF9	f__AB-539-J10	g__RBG-13-51-36	s__
1748_2	3300027962_22	public genome	1	1	0	0	nothing_new_here	p__Chloroflexota	c__Anaerolineae	o__Anaerolineales	f__UBA11858	g__	s__
28_0	3300027968_24	public genome	1	1	0	0	nothing_new_here	p__Chloroflexota	c__Ktedonobacteria	o__Ktedonobacterales	f__	g__	s__
1074_1	3300027968_36	public genome	1	1	0	0	nothing_new_here	p__Chloroflexota	c__Dehalococcoidia	o__UBA2991	f__	g__	s__
82_6	3300027971_34	public genome	2	2	0	0	nothing_new_here	p__Chloroflexota	c__Ellin6529	o__CSP1-4	f__UBA10416	g__UBA10416	s__
1833_1	3300027976_27	public genome	1	1	0	0	nothing_new_here	p__Chloroflexota	c__Anaerolineae	o__Caldilineales	f__Caldilineaceae	g__	s__
1254_2	3300028030_21	public genome	1	1	0	0	nothing_new_here	p__Chloroflexota	c__Anaerolineae	o__	f__	g__	s__
910_0	3300028032_13	public genome	1	1	0	0	nothing_new_here	p__Chloroflexota	c__Dehalococcoidia	o__SZUA-161	f__	g__	s__
685_3	3300028176_21	public genome	3	3	0	0	nothing_new_here	p__Chloroflexota	c__Dehalococcoidia	o__GIF9	f__UBA5620	g__9FT-COMBO-48-23	s__
487_1	3300028178_12	public genome	3	3	0	0	nothing_new_here	p__Chloroflexota	c__Dehalococcoidia	o__GIF9	f__UBA5629	g__UBA1162	s__
1723_3	3300028299_8	public genome	2	2	0	0	nothing_new_here	p__Chloroflexota	c__Anaerolineae	o__UBA7937	f__	g__	s__
2289_3	3300028398_23	public genome	1	1	0	0	nothing_new_here	p__Chloroflexota	c__Anaerolineae	o__Anaerolineales	f__	g__	s__
2127_0	3300028399_14	public genome	1	1	0	0	nothing_new_here	p__Chloroflexota	c__Anaerolineae	o__Anaerolineales	f__UBA11579	g__	s__
2137_1	3300028400_45	public genome	1	1	0	0	nothing_new_here	p__Chloroflexota	c__Anaerolineae	o__Anaerolineales	f__	g__	s__
316_0	3300028567_66	public genome	1	1	0	0	nothing_new_here	p__Chloroflexota	c__Anaerolineae	o__Anaerolineales	f__Anaerolineaceae	g__T78	s__
611_2	3300028602_83	public genome	4	3	1	0	mostly_old	p__Chloroflexota	c__Dehalococcoidia	o__Dehalococcoidales	f__UBA5627	g__UBA5627	s__
718_0	3300028603_106	public genome	1	1	0	0	nothing_new_here	p__Chloroflexota	c__Dehalococcoidia	o__Dehalococcoidales	f__UBA5627	g__UBA5627	s__
1293_0	3300028603_50	public genome	1	1	0	0	nothing_new_here	p__Chloroflexota	c__Dehalococcoidia	o__UBA2979	f__UBA2979	g__	s__
2000_4	3300029314_4	public genome	1	1	0	0	nothing_new_here	p__Chloroflexota	c__Anaerolineae	o__	f__	g__	s__
287_0	3300029775_14	public genome	1	1	0	0	nothing_new_here	p__Chloroflexota	c__Anaerolineae	o__Anaerolineales	f__Anaerolineaceae	g__T78	s__T78 sp002411175
309_0	3300029822_19	public genome	1	1	0	0	nothing_new_here	p__Chloroflexota	c__Anaerolineae	o__Anaerolineales	f__Anaerolineaceae	g__T78	s__T78 sp002407905
2373_1	3300029893_16	public genome	2	1	1	0	old+new_onlyMAGsSRA	p__Chloroflexota	c__Dehalococcoidia	o__GIF9	f__	g__	s__
20_1	3300029894_7	public genome	3	3	0	0	nothing_new_here	p__Chloroflexota	c__Ktedonobacteria	o__Ktedonobacterales	f__Ktedonobacteraceae	g__	s__
1461_0	3300029900_5	public genome	1	1	0	0	nothing_new_here	p__Chloroflexota	c__UBA5177	o__	f__	g__	s__
2530_0	3300029902_12	public genome	1	1	0	0	nothing_new_here	p__Chloroflexota	c__Ktedonobacteria	o__Ktedonobacterales	f__	g__	s__
1865_0	3300029902_9	public genome	1	1	0	0	nothing_new_here	p__Chloroflexota	c__Ktedonobacteria	o__Ktedonobacterales	f__	g__	s__
1513_0	A0_1	environmental sample	1	0	0	1	new_onlyMAGsSample	p__Chloroflexota	c__FW602-bin22	o__FW602-bin22	f__CADDYW01	g__CADDYW01	s__
19_0	A0_13	environmental sample	1	0	0	1	new_onlyMAGsSample	p__Chloroflexota	c__Ktedonobacteria	o__Ktedonobacterales	f__Ktedonobacteraceae	g__	s__
1487_2	A0_14	environmental sample	1	0	0	1	new_onlyMAGsSample	p__Chloroflexota	c__Chloroflexia	o__Thermomicrobiales	f__	g__	s__
1732_2	A0_15	environmental sample	1	0	0	1	new_onlyMAGsSample	p__Chloroflexota	c__Dehalococcoidia	o__DSGV01	f__DSGV01	g__DSGV01	s__
452_0	A0_16	environmental sample	1	0	0	1	new_onlyMAGsSample	p__Chloroflexota	c__Dehalococcoidia	o__SpSt-223	f__	g__	s__
1503_2	A0_18	environmental sample	1	0	0	1	new_onlyMAGsSample	p__Chloroflexota	c__Chloroflexia	o__Thermomicrobiales	f__Thermomicrobiaceae	g__HRBIN26	s__
1453_2	A0_19	environmental sample	2	0	1	1	new_MAGsSRA+Sample	p__Chloroflexota	c__Ellin6529	o__CSP1-4	f__CSP1-4	g__	s__
1503_3	A0_20	environmental sample	1	0	0	1	new_onlyMAGsSample	p__Chloroflexota	c__Chloroflexia	o__Thermomicrobiales	f__Thermomicrobiaceae	g__HRBIN26	s__
1487_1	A0_21	environmental sample	2	0	1	1	new_MAGsSRA+Sample	p__Chloroflexota	c__Chloroflexia	o__Thermomicrobiales	f__	g__	s__
1227_0	A0_23	environmental sample	1	0	0	1	new_onlyMAGsSample	p__Chloroflexota	c__UBA6077	o__UBA6077	f__	g__	s__
71_0	A0_24	environmental sample	1	0	0	1	new_onlyMAGsSample	p__Chloroflexota	c__Ktedonobacteria	o__Ktedonobacterales	f__Ktedonobacteraceae	g__CF-113	s__
1740_4	A0_25	environmental sample	1	0	0	1	new_onlyMAGsSample	p__Chloroflexota	c__Anaerolineae	o__Thermoflexales	f__Thermoflexaceae	g__Thermoflexus	s__
2123_2	A0_26	environmental sample	1	0	0	1	new_onlyMAGsSample	p__Chloroflexota	c__UBA2235	o__SpSt-225	f__SpSt-225	g__SpSt-225	s__
1224_0	A0_27	environmental sample	1	0	0	1	new_onlyMAGsSample	p__Chloroflexota	c__UBA6077	o__UBA6077	f__	g__	s__
1226_1	A0_28	environmental sample	2	1	0	1	old+new_MAGsSRA+Sample	p__Chloroflexota	c__UBA6077	o__UBA6077	f__CF-72	g__	s__
2122_2	A0_29	environmental sample	1	0	0	1	new_onlyMAGsSample	p__Chloroflexota	c__UBA2235	o__UBA12225	f__	g__	s__
1654_6	A0_31	environmental sample	1	0	0	1	new_onlyMAGsSample	p__Chloroflexota	c__Dehalococcoidia	o__SpSt-223	f__SpSt-223	g__SpSt-223	s__
1219_2	A0_33	environmental sample	1	0	0	1	new_onlyMAGsSample	p__Chloroflexota	c__UBA6077	o__UBA6077	f__	g__	s__
18_7	A0_34	environmental sample	1	0	0	1	new_onlyMAGsSample	p__Chloroflexota	c__Ktedonobacteria	o__Ktedonobacterales	f__Ktedonobacteraceae	g__Thermogemmatispora	s__
1732_4	A0_35	environmental sample	1	0	0	1	new_onlyMAGsSample	p__Chloroflexota	c__Dehalococcoidia	o__DSGV01	f__DSGV01	g__DSGV01	s__
1577_1	A0_36	environmental sample	2	0	1	1	new_MAGsSRA+Sample	p__Chloroflexota	c__Chloroflexia	o__Chloroflexales	f__Roseiflexaceae	g__	s__
1074_2	A0_37	environmental sample	1	0	0	1	new_onlyMAGsSample	p__Chloroflexota	c__Dehalococcoidia	o__DSGV01	f__	g__	s__
1410_2	A0_4	environmental sample	1	0	0	1	new_onlyMAGsSample	p__Chloroflexota	c__Ellin6529	o__CSP1-4	f__CSP1-4	g__CF-46	s__
1492_0	A0_41	environmental sample	1	0	0	1	new_onlyMAGsSample	p__Chloroflexota	c__FW602-bin22	o__	f__	g__	s__
1453_5	A0_42	environmental sample	1	0	0	1	new_onlyMAGsSample	p__Chloroflexota	c__Ellin6529	o__CSP1-4	f__CSP1-4	g__	s__
1622_1	A0_43	environmental sample	2	1	0	1	old+new_MAGsSRA+Sample	p__Chloroflexota	c__Anaerolineae	o__SBR1031	f__UBA2796	g__	s__
1392_1	A0_44	environmental sample	1	0	0	1	new_onlyMAGsSample	p__Chloroflexota	c__Ellin6529	o__CSP1-4	f__CSP1-4	g__	s__
1392_2	A0_45	environmental sample	1	0	0	1	new_onlyMAGsSample	p__Chloroflexota	c__Ellin6529	o__CSP1-4	f__CSP1-4	g__	s__
2218_0	A0_6	environmental sample	1	0	0	1	new_onlyMAGsSample	p__Chloroflexota	c__Anaerolineae	o__Anaerolineales	f__EnvOPS12	g__Fen-1038	s__
1225_0	A0_8	environmental sample	1	0	0	1	new_onlyMAGsSample	p__Chloroflexota	c__UBA6077	o__UBA6077	f__	g__	s__
383_2	A0_9	environmental sample	1	0	0	1	new_onlyMAGsSample	p__Chloroflexota	c__Chloroflexia	o__Thermobaculales	f__Thermobaculaceae	g__Thermobaculum	s__
1426_0	B11_15	binning approach	1	0	1	0	new_onlyMAGsSRA	p__Dormibacterota	c__Dormibacteria	o__Dormibacterales	f__Dormibacteraceae	g__Palsa-870	s__
63_2	B11_17	binning approach	1	0	1	0	new_onlyMAGsSRA	p__Chloroflexota	c__Ktedonobacteria	o__Ktedonobacterales	f__Ktedonobacteraceae	g__	s__
63_1	B11_19	binning approach	2	0	2	0	new_onlyMAGsSRA	p__Chloroflexota	c__Ktedonobacteria	o__Ktedonobacterales	f__Ktedonobacteraceae	g__	s__
61_2	B11_22	binning approach	1	0	1	0	new_onlyMAGsSRA	p__Chloroflexota	c__Ktedonobacteria	o__Ktedonobacterales	f__Ktedonobacteraceae	g__CF-113	s__
56_1	B11_8	binning approach	1	0	1	0	new_onlyMAGsSRA	p__Chloroflexota	c__Ktedonobacteria	o__Ktedonobacterales	f__Ktedonobacteraceae	g__CF-113	s__
58_0	B111_24	binning approach	1	0	1	0	new_onlyMAGsSRA	p__Chloroflexota	c__Ktedonobacteria	o__Ktedonobacterales	f__Ktedonobacteraceae	g__CF-113	s__
1433_1	B111_28	binning approach	1	0	1	0	new_onlyMAGsSRA	p__Dormibacterota	c__Dormibacteria	o__Dormibacterales	f__Dormibacteraceae	g__40CM-4-65-16	s__
68_0	B111_29	binning approach	1	0	1	0	new_onlyMAGsSRA	p__Chloroflexota	c__Ktedonobacteria	o__Ktedonobacterales	f__Ktedonobacteraceae	g__CF-113	s__
39_0	B111_30	binning approach	1	0	1	0	new_onlyMAGsSRA	p__Chloroflexota	c__Ktedonobacteria	o__Ktedonobacterales	f__Ktedonobacteraceae	g__DTNP01	s__
2211_1	B111_31	binning approach	1	0	1	0	new_onlyMAGsSRA	p__Dormibacterota	c__Dormibacteria	o__Dormibacterales	f__Dormibacteraceae	g__CF-161	s__
1430_1	B111_34	binning approach	2	0	2	0	new_onlyMAGsSRA	p__Dormibacterota	c__Dormibacteria	o__Dormibacterales	f__Dormibacteraceae	g__CF-54	s__
65_0	B111_35	binning approach	1	0	1	0	new_onlyMAGsSRA	p__Chloroflexota	c__Ktedonobacteria	o__Ktedonobacterales	f__Ktedonobacteraceae	g__	s__
508_0	B14_40	binning approach	1	0	1	0	new_onlyMAGsSRA	p__Chloroflexota	c__Anaerolineae	o__Anaerolineales	f__UBA4823	g__	s__
2132_1	B22_41	binning approach	1	0	1	0	new_onlyMAGsSRA	p__Chloroflexota	c__Anaerolineae	o__Anaerolineales	f__EnvOPS12	g__	s__
359_0	B22_43	binning approach	1	0	1	0	new_onlyMAGsSRA	p__Chloroflexota	c__Anaerolineae	o__Anaerolineales	f__Anaerolineaceae	g__	s__
306_1	B22_44	binning approach	3	1	2	0	old+new_onlyMAGsSRA	p__Chloroflexota	c__Anaerolineae	o__Anaerolineales	f__Anaerolineaceae	g__UBA6107	s__UBA6107 sp003501835
1576_1	B3_55	binning approach	2	0	1	1	new_MAGsSRA+Sample	p__Chloroflexota	c__Chloroflexia	o__Chloroflexales	f__Roseiflexaceae	g__	s__
1614_1	B3_56	binning approach	1	0	1	0	new_onlyMAGsSRA	p__Chloroflexota	c__Chloroflexia	o__54-19	f__	g__	s__
1614_2	B3_58	binning approach	1	0	1	0	new_onlyMAGsSRA	p__Chloroflexota	c__Chloroflexia	o__54-19	f__	g__	s__
56_2	B30_62	binning approach	1	0	1	0	new_onlyMAGsSRA	p__Chloroflexota	c__Ktedonobacteria	o__Ktedonobacterales	f__Ktedonobacteraceae	g__CF-113	s__
63_3	B30_64	binning approach	1	0	1	0	new_onlyMAGsSRA	p__Chloroflexota	c__Ktedonobacteria	o__Ktedonobacterales	f__Ktedonobacteraceae	g__	s__
56_3	B30_65	binning approach	1	0	1	0	new_onlyMAGsSRA	p__Chloroflexota	c__Ktedonobacteria	o__Ktedonobacterales	f__Ktedonobacteraceae	g__CF-113	s__
2155_0	B30_66	binning approach	1	0	1	0	new_onlyMAGsSRA	p__Chloroflexota	c__Anaerolineae	o__Anaerolineales	f__EnvOPS12	g__UBA12294	s__
48_0	B30_70	binning approach	1	0	1	0	new_onlyMAGsSRA	p__Chloroflexota	c__Ktedonobacteria	o__Ktedonobacterales	f__Ktedonobacteraceae	g__JACDAE01	s__
1435_1	B30_72	binning approach	1	0	1	0	new_onlyMAGsSRA	p__Dormibacterota	c__Dormibacteria	o__Dormibacterales	f__Dormibacteraceae	g__40CM-4-65-16	s__
2156_0	B30_75	binning approach	1	0	1	0	new_onlyMAGsSRA	p__Chloroflexota	c__Anaerolineae	o__Anaerolineales	f__EnvOPS12	g__UBA12294	s__
1419_1	B30_76	binning approach	1	0	1	0	new_onlyMAGsSRA	p__Dormibacterota	c__Dormibacteria	o__Dormibacterales	f__Dormibacteraceae	g__CF-161	s__
47_2	B30_77	binning approach	1	0	1	0	new_onlyMAGsSRA	p__Chloroflexota	c__Ktedonobacteria	o__Ktedonobacterales	f__Ktedonobacteraceae	g__JACDAE01	s__
1434_2	B30_78	binning approach	1	0	1	0	new_onlyMAGsSRA	p__Dormibacterota	c__Dormibacteria	o__Dormibacterales	f__Dormibacteraceae	g__40CM-4-65-16	s__
55_1	B31_84	binning approach	3	1	2	0	old+new_onlyMAGsSRA	p__Chloroflexota	c__Ktedonobacteria	o__Ktedonobacterales	f__Ktedonobacteraceae	g__UBA11361	s__
1059_0	B32_90	binning approach	1	0	1	0	new_onlyMAGsSRA	p__Chloroflexota	c__Dehalococcoidia	o__DSGV01	f__	g__	s__
1488_1	B32_95	binning approach	2	0	2	0	new_onlyMAGsSRA	p__Chloroflexota	c__Chloroflexia	o__Thermomicrobiales	f__	g__	s__
755_0	B38_102	binning approach	1	0	1	0	new_onlyMAGsSRA	p__Chloroflexota	c__Ktedonobacteria	o__Ktedonobacterales	f__Ktedonobacteraceae	g__CF-113	s__
52_1	B38_96	binning approach	1	0	1	0	new_onlyMAGsSRA	p__Chloroflexota	c__Ktedonobacteria	o__Ktedonobacterales	f__Ktedonobacteraceae	g__Dictyobacter	s__
50_1	B38_97	binning approach	2	0	2	0	new_onlyMAGsSRA	p__Chloroflexota	c__Ktedonobacteria	o__Ktedonobacterales	f__Ktedonobacteraceae	g__Dictyobacter	s__
1979_5	B52_122	binning approach	2	0	2	0	new_onlyMAGsSRA	p__Chloroflexota	c__Anaerolineae	o__Promineofilales	f__Promineofilaceae	g__Promineofilum	s__
2000_3	B52_126	binning approach	2	0	2	0	new_onlyMAGsSRA	p__Chloroflexota	c__Anaerolineae	o__CG2-30-64-16	f__SSC4	g__	s__
344_1	B52_127	binning approach	3	0	3	0	new_onlyMAGsSRA	p__Chloroflexota	c__Anaerolineae	o__Anaerolineales	f__Anaerolineaceae	g__Longilinea	s__
2211_2	B57_128	binning approach	1	0	1	0	new_onlyMAGsSRA	p__Dormibacterota	c__Dormibacteria	o__Dormibacterales	f__Dormibacteraceae	g__CF-161	s__
1433_2	B61_133	binning approach	1	0	1	0	new_onlyMAGsSRA	p__Dormibacterota	c__Dormibacteria	o__Dormibacterales	f__Dormibacteraceae	g__40CM-4-65-16	s__
1429_3	B61_138	binning approach	1	0	1	0	new_onlyMAGsSRA	p__Dormibacterota	c__Dormibacteria	o__Dormibacterales	f__Dormibacteraceae	g__CF-118	s__
1432_0	B61_142	binning approach	1	0	1	0	new_onlyMAGsSRA	p__Dormibacterota	c__Dormibacteria	o__Dormibacterales	f__Dormibacteraceae	g__40CM-4-65-16	s__
1223_0	B73_144	binning approach	1	0	1	0	new_onlyMAGsSRA	p__Chloroflexota	c__UBA6077	o__UBA6077	f__	g__	s__
1480_0	B73_145	binning approach	1	0	1	0	new_onlyMAGsSRA	p__Chloroflexota	c__Chloroflexia	o__Chloroflexales	f__Herpetosiphonaceae	g__JKG1	s__
2291_0	B73_147	binning approach	1	0	1	0	new_onlyMAGsSRA	p__Chloroflexota	c__UBA2235	o__UBA12225	f__	g__	s__
342_5	B77_159	binning approach	1	0	1	0	new_onlyMAGsSRA	p__Chloroflexota	c__Anaerolineae	o__Anaerolineales	f__Anaerolineaceae	g__UBA6170	s__
300_7	B85_164	binning approach	1	0	1	0	new_onlyMAGsSRA	p__Chloroflexota	c__Anaerolineae	o__Anaerolineales	f__Anaerolineaceae	g__T78	s__
225_0	B85_172	binning approach	1	0	1	0	new_onlyMAGsSRA	p__Chloroflexota	c__Anaerolineae	o__Anaerolineales	f__UBA4823	g__JAAYXE01	s__
1582_1	B88_174	binning approach	1	0	1	0	new_onlyMAGsSRA	p__Chloroflexota	c__Chloroflexia	o__Chloroflexales	f__Roseiflexaceae	g__Kouleothrix	s__
1579_0	B88_175	binning approach	1	0	1	0	new_onlyMAGsSRA	p__Chloroflexota	c__Chloroflexia	o__Chloroflexales	f__Roseiflexaceae	g__	s__
1073_1	B88_177	binning approach	3	2	1	0	old+new_onlyMAGsSRA	p__Chloroflexota	c__Dehalococcoidia	o__SM23-28-2	f__RBG-16-64-32	g__CF-163	s__
1582_2	B88_178	binning approach	1	0	1	0	new_onlyMAGsSRA	p__Chloroflexota	c__Chloroflexia	o__Chloroflexales	f__Roseiflexaceae	g__Kouleothrix	s__
951_2	B89_182	binning approach	1	0	1	0	new_onlyMAGsSRA	p__Chloroflexota	c__Dehalococcoidia	o__UBA2991	f__UBA2991	g__	s__
1770_1	B89_184	binning approach	2	0	2	0	new_onlyMAGsSRA	p__Chloroflexota	c__Anaerolineae	o__SBR1031	f__A4b	g__OLB15	s__
898_1	B89_189	binning approach	8	4	3	1	old+new_MAGsSRA+Sample	p__Chloroflexota	c__Chloroflexia	o__Thermomicrobiales	f__Thermomicrobiaceae	g__Thermomicrobium	s__
1503_1	B89_190	binning approach	4	2	2	0	old+new_onlyMAGsSRA	p__Chloroflexota	c__Chloroflexia	o__Thermomicrobiales	f__Thermomicrobiaceae	g__HRBIN26	s__HRBIN26 peleae_A
53_0	B93_191	binning approach	1	0	1	0	new_onlyMAGsSRA	p__Chloroflexota	c__Ktedonobacteria	o__Ktedonobacterales	f__Ktedonobacteraceae	g__CF-113	s__
21_0	B93_193	binning approach	1	0	1	0	new_onlyMAGsSRA	p__Chloroflexota	c__Ktedonobacteria	o__Ktedonobacterales	f__Ktedonobacteraceae	g__DTNP01	s__
54_0	B93_195	binning approach	1	0	1	0	new_onlyMAGsSRA	p__Chloroflexota	c__Ktedonobacteria	o__Ktedonobacterales	f__Ktedonobacteraceae	g__CF-113	s__
52_2	B93_197	binning approach	1	0	1	0	new_onlyMAGsSRA	p__Chloroflexota	c__Ktedonobacteria	o__Ktedonobacterales	f__Ktedonobacteraceae	g__Dictyobacter	s__
1008_0	C0_10	environmental sample	1	0	0	1	new_onlyMAGsSample	p__Chloroflexota	c__UBA6077	o__UBA6077	f__	g__	s__
1740_2	C0_11	environmental sample	1	0	0	1	new_onlyMAGsSample	p__Chloroflexota	c__Anaerolineae	o__Thermoflexales	f__Thermoflexaceae	g__Thermoflexus	s__
1995_0	C0_13	environmental sample	1	0	0	1	new_onlyMAGsSample	p__Chloroflexota	c__Dehalococcoidia	o__GIF9	f__	g__	s__
2375_0	C0_12	environmental sample	1	0	0	1	new_onlyMAGsSample	p__Chloroflexota	c__Anaerolineae	o__	f__	g__	s__
385_1	C0_2	environmental sample	2	0	0	2	new_onlyMAGsSample	p__Chloroflexota	c__Anaerolineae	o__SpSt-600	f__SpSt-600	g__SpSt-600	s__
1722_0	C0_3	environmental sample	1	0	0	1	new_onlyMAGsSample	p__Chloroflexota	c__Anaerolineae	o__E26-bin7	f__JACIWR01	g__	s__
1731_4	C0_4	environmental sample	1	0	0	1	new_onlyMAGsSample	p__Chloroflexota	c__Anaerolineae	o__DTPP01	f__DTLA01	g__DTLA01	s__
1736_14	C0_5	environmental sample	1	0	0	1	new_onlyMAGsSample	p__Chloroflexota	c__Anaerolineae	o__B4-G1	f__DUEL01	g__SpSt-77	s__
1804_2	C0_6	environmental sample	1	0	0	1	new_onlyMAGsSample	p__Chloroflexota	c__Anaerolineae	o__CG2-30-64-16	f__CG2-30-64-16	g__MWBF01	s__
2102_0	C0_8	environmental sample	1	0	0	1	new_onlyMAGsSample	p__Chloroflexota	c__Anaerolineae	o__Anaerolineales	f__EnvOPS12	g__UBA12294	s__
1704_0	C0_9	environmental sample	1	0	0	1	new_onlyMAGsSample	p__Chloroflexota	c__Anaerolineae	o__Anaerolineales	f__UBA4823	g__DSTM01	s__
2207_0	F10_1	binning approach	1	0	1	0	new_onlyMAGsSRA	p__Chloroflexota	c__Anaerolineae	o__Anaerolineales	f__EnvOPS12	g__UBA5195	s__
1295_0	F11_11	binning approach	1	0	1	0	new_onlyMAGsSRA	p__Chloroflexota	c__Dehalococcoidia	o__UBA2991	f__UBA2991	g__PNKC01	s__
1771_1	F11_12	binning approach	3	2	1	0	old+new_onlyMAGsSRA	p__Chloroflexota	c__Anaerolineae	o__SBR1031	f__A4b	g__OLB15	s__
1980_1	F11_13	binning approach	2	1	1	0	old+new_onlyMAGsSRA	p__Chloroflexota	c__Anaerolineae	o__SBR1031	f__A4b	g__	s__
1296_0	F11_14	binning approach	1	0	1	0	new_onlyMAGsSRA	p__Chloroflexota	c__Dehalococcoidia	o__UBA2991	f__UBA2991	g__PNKC01	s__
1394_1	F11_3	binning approach	3	2	1	0	old+new_onlyMAGsSRA	p__Chloroflexota	c__Ellin6529	o__CSP1-4	f__CSP1-4	g__SPCO01	s__
1773_1	F11_4	binning approach	2	1	1	0	old+new_onlyMAGsSRA	p__Chloroflexota	c__Anaerolineae	o__SBR1031	f__A4b	g__OLB13	s__
1780_1	F11_7	binning approach	2	1	1	0	old+new_onlyMAGsSRA	p__Chloroflexota	c__Anaerolineae	o__SBR1031	f__A4b	g__GCA-2699585	s__
2329_2	F11_8	binning approach	1	0	1	0	new_onlyMAGsSRA	p__Chloroflexota	c__Anaerolineae	o__Caldilineales	f__Caldilineaceae	g__CFX5	s__
1267_0	F11_9	binning approach	1	0	1	0	new_onlyMAGsSRA	p__Chloroflexota	c__Dehalococcoidia	o__DSTF01	f__	g__	s__
199_0	F14_15	binning approach	1	0	1	0	new_onlyMAGsSRA	p__Chloroflexota	c__Anaerolineae	o__Anaerolineales	f__UBA11858	g__B10-G9	s__
1841_0	F14_17	binning approach	1	0	1	0	new_onlyMAGsSRA	p__Chloroflexota	c__Anaerolineae	o__B4-G1	f__SLSP01	g__	s__
1890_0	F14_18	binning approach	1	0	1	0	new_onlyMAGsSRA	p__Chloroflexota	c__Anaerolineae	o__SBR1031	f__UBA2029	g__TC-15	s__
1985_0	F14_20	binning approach	1	0	1	0	new_onlyMAGsSRA	p__Chloroflexota	c__Anaerolineae	o__SBR1031	f__A4b	g__J038	s__
2495_0	F14_21	binning approach	1	0	1	0	new_onlyMAGsSRA	p__Chloroflexota	c__Anaerolineae	o__SBR1031	f__J027	g__J027	s__
1209_0	F14_25	binning approach	1	0	1	0	new_onlyMAGsSRA	p__Chloroflexota	c__Anaerolineae	o__SBR1031	f__A4b	g__GCA-2699585	s__
1129_0	F14_26	binning approach	1	0	1	0	new_onlyMAGsSRA	p__Chloroflexota	c__Anaerolineae	o__SBR1031	f__A4b	g__CAIRDJ01	s__
1846_1	F14_27	binning approach	2	0	2	0	new_onlyMAGsSRA	p__Chloroflexota	c__Anaerolineae	o__B4-G1	f__SLSP01	g__JAAAOZ01	s__
379_0	F14_28	binning approach	1	0	1	0	new_onlyMAGsSRA	p__Chloroflexota	c__Anaerolineae	o__SBR1031	f__A4b	g__GCA-2699585	s__
1618_1	F14_29	binning approach	1	0	1	0	new_onlyMAGsSRA	p__Chloroflexota	c__Anaerolineae	o__SBR1031	f__A4b	g__	s__
1126_0	F14_30	binning approach	1	0	1	0	new_onlyMAGsSRA	p__Chloroflexota	c__Anaerolineae	o__SBR1031	f__A4b	g__CAIRDJ01	s__
1983_0	F14_31	binning approach	1	0	1	0	new_onlyMAGsSRA	p__Chloroflexota	c__Anaerolineae	o__SBR1031	f__A4b	g__J038	s__
300_5	F16_33	binning approach	1	0	1	0	new_onlyMAGsSRA	p__Chloroflexota	c__Anaerolineae	o__Anaerolineales	f__Anaerolineaceae	g__T78	s__
242_0	F17_38	binning approach	1	0	1	0	new_onlyMAGsSRA	p__Chloroflexota	c__Anaerolineae	o__Anaerolineales	f__Anaerolineaceae	g__	s__
1127_0	F17_39	binning approach	1	0	1	0	new_onlyMAGsSRA	p__Chloroflexota	c__Anaerolineae	o__SBR1031	f__A4b	g__CAIRDJ01	s__
380_0	F17_40	binning approach	1	0	1	0	new_onlyMAGsSRA	p__Chloroflexota	c__Anaerolineae	o__SBR1031	f__A4b	g__CAIRDJ01	s__
1249_0	F17_41	binning approach	1	0	1	0	new_onlyMAGsSRA	p__Chloroflexota	c__Anaerolineae	o__B4-G1	f__B4-G1	g__	s__
1261_3	F17_42	binning approach	1	0	1	0	new_onlyMAGsSRA	p__Chloroflexota	c__Anaerolineae	o__B4-G1	f__B4-G1	g__DSAR01	s__
1879_0	F17_43	binning approach	1	0	1	0	new_onlyMAGsSRA	p__Chloroflexota	c__Anaerolineae	o__SBR1031	f__UBA2029	g__TC-15	s__
1539_0	F17_44	binning approach	1	0	1	0	new_onlyMAGsSRA	p__Chloroflexota	c__Chloroflexia	o__Chloroflexales	f__Chloroflexaceae	g__JAAUSY01	s__
1537_0	F17_45	binning approach	1	0	1	0	new_onlyMAGsSRA	p__Chloroflexota	c__Chloroflexia	o__Chloroflexales	f__Chloroflexaceae	g__JAAUSY01	s__
1541_1	F17_46	binning approach	1	0	1	0	new_onlyMAGsSRA	p__Chloroflexota	c__Chloroflexia	o__Chloroflexales	f__Chloroflexaceae	g__JAAUSY01	s__
243_0	F17_48	binning approach	1	0	1	0	new_onlyMAGsSRA	p__Chloroflexota	c__Anaerolineae	o__Anaerolineales	f__Anaerolineaceae	g__	s__
1845_0	F17_49	binning approach	1	0	1	0	new_onlyMAGsSRA	p__Chloroflexota	c__Anaerolineae	o__B4-G1	f__SLSP01	g__G713	s__
1616_2	F17_50	binning approach	1	0	1	0	new_onlyMAGsSRA	p__Chloroflexota	c__Chloroflexia	o__Chloroflexales	f__Chloroflexaceae	g__	s__
2069_0	F17_51	binning approach	1	0	1	0	new_onlyMAGsSRA	p__Chloroflexota	c__Anaerolineae	o__B4-G1	f__	g__	s__
1851_0	F17_54	binning approach	1	0	1	0	new_onlyMAGsSRA	p__Chloroflexota	c__Anaerolineae	o__B4-G1	f__B4-G1	g__	s__
1558_0	F17_55	binning approach	1	0	1	0	new_onlyMAGsSRA	p__Chloroflexota	c__Chloroflexia	o__Chloroflexales	f__Chloroflexaceae	g__	s__
1540_0	F17_56	binning approach	1	0	1	0	new_onlyMAGsSRA	p__Chloroflexota	c__Chloroflexia	o__Chloroflexales	f__Chloroflexaceae	g__JAAUSY01	s__
1842_0	F17_57	binning approach	1	0	1	0	new_onlyMAGsSRA	p__Chloroflexota	c__Anaerolineae	o__B4-G1	f__SLSP01	g__	s__
1891_0	F17_58	binning approach	1	0	1	0	new_onlyMAGsSRA	p__Chloroflexota	c__Anaerolineae	o__SBR1031	f__A4b	g__	s__
1926_1	F18_61	binning approach	2	1	1	0	old+new_onlyMAGsSRA	p__Chloroflexota	c__Anaerolineae	o__SBR1031	f__A4b	g__OLB15	s__
1589_1	F18_63	binning approach	4	2	2	0	old+new_onlyMAGsSRA	p__Chloroflexota	c__Chloroflexia	o__Chloroflexales	f__Chloroflexaceae	g__OHK40	s__
1925_1	F18_65	binning approach	2	1	1	0	old+new_onlyMAGsSRA	p__Chloroflexota	c__Anaerolineae	o__SBR1031	f__A4b	g__OLB15	s__
2208_1	F2_69	binning approach	4	1	3	0	mostly_new_onlyMAGsSRA	p__Chloroflexota	c__Anaerolineae	o__Anaerolineales	f__EnvOPS12	g__OLB14	s__
882_0	F2_71	binning approach	1	0	1	0	new_onlyMAGsSRA	p__Chloroflexota	c__Dehalococcoidia	o__SZUA-161	f__SpSt-899	g__JABMQN01	s__
1927_1	F20_72	binning approach	2	1	1	0	old+new_onlyMAGsSRA	p__Chloroflexota	c__Anaerolineae	o__SBR1031	f__A4b	g__OLB15	s__
1867_1	F20_74	binning approach	2	0	2	0	new_onlyMAGsSRA	p__Chloroflexota	c__Anaerolineae	o__SBR1031	f__A4b	g__OLB15	s__
1680_2	F20_76	binning approach	1	0	1	0	new_onlyMAGsSRA	p__Chloroflexota	c__Anaerolineae	o__SBR1031	f__A4b	g__GCA-2699585	s__
2326_0	F20_77	binning approach	1	0	1	0	new_onlyMAGsSRA	p__Chloroflexota	c__Anaerolineae	o__Caldilineales	f__Caldilineaceae	g__CFX5	s__
1481_1	F20_78	binning approach	1	0	1	0	new_onlyMAGsSRA	p__Chloroflexota	c__Chloroflexia	o__Chloroflexales	f__Herpetosiphonaceae	g__JACCRK01	s__
164_1	F20_80	binning approach	6	5	1	0	mostly_old	p__Chloroflexota	c__Chloroflexia	o__Chloroflexales	f__Roseiflexaceae	g__	s__
1934_2	F3_81	binning approach	1	0	1	0	new_onlyMAGsSRA	p__Chloroflexota	c__Anaerolineae	o__SBR1031	f__A4b	g__OLB15	s__
1928_0	F3_83	binning approach	1	0	1	0	new_onlyMAGsSRA	p__Chloroflexota	c__Anaerolineae	o__SBR1031	f__A4b	g__OLB15	s__
2189_2	F3_85	binning approach	1	0	1	0	new_onlyMAGsSRA	p__Chloroflexota	c__Anaerolineae	o__Anaerolineales	f__EnvOPS12	g__OLB14	s__
1300_0	F3_86	binning approach	1	0	1	0	new_onlyMAGsSRA	p__Chloroflexota	c__Dehalococcoidia	o__UBA2991	f__UBA2991	g__FeB-14	s__
1368_0	F3_87	binning approach	1	0	1	0	new_onlyMAGsSRA	p__Chloroflexota	c__Ellin6529	o__CSP1-4	f__CSP1-4	g__	s__
2517_4	F3_88	binning approach	1	0	1	0	new_onlyMAGsSRA	p__Chloroflexota	c__Anaerolineae	o__SBR1031	f__J027	g__CFX10	s__
1931_2	F3_89	binning approach	1	0	1	0	new_onlyMAGsSRA	p__Chloroflexota	c__Anaerolineae	o__SBR1031	f__A4b	g__OLB15	s__
1744_0	F3_91	binning approach	1	0	1	0	new_onlyMAGsSRA	p__Chloroflexota	c__Anaerolineae	o__Promineofilales	f__Promineofilaceae	g__	s__
2084_1	F3_92	binning approach	2	1	1	0	old+new_onlyMAGsSRA	p__Chloroflexota	c__Anaerolineae	o__SBR1031	f__UBA2796	g__UBA2796	s__UBA2796 sp002352035
1155_1	F3_93	binning approach	2	1	1	0	old+new_onlyMAGsSRA	p__Chloroflexota	c__Anaerolineae	o__UBA4142	f__SHND01	g__SHND01	s__
1363_1	F3_94	binning approach	1	0	1	0	new_onlyMAGsSRA	p__Chloroflexota	c__Ellin6529	o__CSP1-4	f__CSP1-4	g__	s__
1307_1	F3_95	binning approach	2	1	1	0	old+new_onlyMAGsSRA	p__Chloroflexota	c__Dehalococcoidia	o__UBA2991	f__UBA2991	g__UCB2	s__UCB2 sp003577245
558_1	F3_97	binning approach	1	0	1	0	new_onlyMAGsSRA	p__Chloroflexota	c__Anaerolineae	o__SBR1031	f__A4b	g__OLB15	s__
2182_3	F4_102	binning approach	1	0	1	0	new_onlyMAGsSRA	p__Chloroflexota	c__Anaerolineae	o__Anaerolineales	f__EnvOPS12	g__OLB14	s__
2180_3	F5_105	binning approach	4	1	3	0	mostly_new_onlyMAGsSRA	p__Chloroflexota	c__Anaerolineae	o__Anaerolineales	f__EnvOPS12	g__OLB14	s__
511_1	F5_106	binning approach	4	1	3	0	mostly_new_onlyMAGsSRA	p__Chloroflexota	c__Anaerolineae	o__4572-78	f__J111	g__DSQQ01	s__
799_1	F5_108	binning approach	2	1	1	0	old+new_onlyMAGsSRA	p__Chloroflexota	c__Chloroflexia	o__Chloroflexales	f__Chloroflexaceae	g__UBA1466	s__UBA1466 sp002325605
1846_3	F7_113	binning approach	1	0	1	0	new_onlyMAGsSRA	p__Chloroflexota	c__Anaerolineae	o__B4-G1	f__SLSP01	g__JAAAOZ01	s__
1616_3	F7_114	binning approach	1	0	1	0	new_onlyMAGsSRA	p__Chloroflexota	c__Chloroflexia	o__Chloroflexales	f__Chloroflexaceae	g__	s__
1843_1	F7_115	binning approach	1	0	1	0	new_onlyMAGsSRA	p__Chloroflexota	c__Anaerolineae	o__B4-G1	f__SLSP01	g__G713	s__
543_0	F7_116	binning approach	1	0	1	0	new_onlyMAGsSRA	p__Chloroflexota	c__Anaerolineae	o__SBR1031	f__J027	g__JAAUUD01	s__
2180_4	F9_125	binning approach	3	0	3	0	new_onlyMAGsSRA	p__Chloroflexota	c__Anaerolineae	o__Anaerolineales	f__EnvOPS12	g__OLB14	s__
1571_3	GCA_000016665	public genome	10	4	6	0	old+new_onlyMAGsSRA	p__Chloroflexota	c__Chloroflexia	o__Chloroflexales	f__Roseiflexaceae	g__Roseiflexus	s__Roseiflexus sp000016665
1572_1	GCA_000017805	public genome	4	2	2	0	old+new_onlyMAGsSRA	p__Chloroflexota	c__Chloroflexia	o__Chloroflexales	f__Roseiflexaceae	g__Roseiflexus	s__Roseiflexus castenholzii
895_2	GCA_000021685	public genome	17	10	7	0	old+new_onlyMAGsSRA	p__Chloroflexota	c__Chloroflexia	o__Thermomicrobiales	f__Thermomicrobiaceae	g__Thermomicrobium	s__Thermomicrobium roseum
1563_2	GCA_000021945	public genome	4	2	2	0	old+new_onlyMAGsSRA	p__Chloroflexota	c__Chloroflexia	o__Chloroflexales	f__Chloroflexaceae	g__Chloroflexus	s__Chloroflexus aggregans
1506_2	GCA_000024985	public genome	5	2	3	0	old+new_onlyMAGsSRA	p__Chloroflexota	c__Chloroflexia	o__Thermomicrobiales	f__Thermomicrobiaceae	g__Sphaerobacter	s__Sphaerobacter thermophilus
1113_0	GCA_000143165	public genome	1	1	0	0	nothing_new_here	p__Chloroflexota	c__Dehalococcoidia	o__Dehalococcoidales	f__Dehalococcoidaceae	g__Dehalogenimonas	s__Dehalogenimonas lykanthroporepellens
1575_1	GCA_000152145	public genome	1	1	0	0	nothing_new_here	p__Chloroflexota	c__Chloroflexia	o__Chloroflexales	f__Chloroflexaceae	g__Oscillochloris	s__Oscillochloris trichoides
1810_2	GCA_000281175	public genome	8	3	5	0	old+new_onlyMAGsSRA	p__Chloroflexota	c__Anaerolineae	o__Caldilineales	f__Caldilineaceae	g__Caldilinea	s__Caldilinea aerophila
2094_0	GCA_000297255	public genome	1	1	0	0	nothing_new_here	p__Chloroflexota	c__Chloroflexia	o__Thermomicrobiales	f__Thermomicrobiaceae	g__Nitrolancea	s__Nitrolancea hollandica
2372_0	GCA_000383835	public genome	1	1	0	0	nothing_new_here	p__Chloroflexota	c__Dehalococcoidia	o__UBA2985	f__UBA2985	g__VFHP01	s__
703_0	GCA_000464595	public genome	1	1	0	0	nothing_new_here	p__Chloroflexota	c__Dehalococcoidia	o__GIF9	f__AB-539-J10	g__	s__
1565_1	GCA_000516515	public genome	3	2	1	0	old+new_onlyMAGsSRA	p__Chloroflexota	c__Chloroflexia	o__Chloroflexales	f__Chloroflexaceae	g__Chloroflexus	s__Chloroflexus sp000516515
636_1	GCA_000583195	public genome	1	1	0	0	nothing_new_here	p__Chloroflexota	c__Dehalococcoidia	o__Dehalococcoidales	f__UBA5760	g__	s__
18_6	GCA_000702505	public genome	1	1	0	0	nothing_new_here	p__Chloroflexota	c__Ktedonobacteria	o__Ktedonobacterales	f__Ktedonobacteraceae	g__Thermogemmatispora	s__Thermogemmatispora carboxidivorans
1565_2	GCA_000735195	public genome	17	8	9	0	old+new_onlyMAGsSRA	p__Chloroflexota	c__Chloroflexia	o__Chloroflexales	f__Chloroflexaceae	g__Chloroflexus	s__Chloroflexus sp000735195
870_1	GCA_000744775	public genome	6	4	2	0	old+new_onlyMAGsSRA	p__Chloroflexota	c__Chloroflexia	o__Thermomicrobiales	f__Thermomicrobiaceae	g__Thermorudis	s__Thermorudis peleae
1688_0	GCA_001005265	public genome	1	1	0	0	nothing_new_here	p__Chloroflexota	c__Dehalococcoidia	o__Dehalococcoidales	f__Dehalococcoidaceae	g__Dehalogenimonas	s__Dehalogenimonas sp001005265
555_1	GCA_001050195	public genome	2	1	1	0	old+new_onlyMAGsSRA	p__Chloroflexota	c__Anaerolineae	o__Anaerolineales	f__Anaerolineaceae	g__Anaerolinea	s__Anaerolinea thermolimosa
349_1	GCA_001050215	public genome	3	2	1	0	old+new_onlyMAGsSRA	p__Chloroflexota	c__Anaerolineae	o__Anaerolineales	f__Anaerolineaceae	g__Bellilinea	s__Bellilinea caldifistulae
345_0	GCA_001050235	public genome	1	1	0	0	nothing_new_here	p__Chloroflexota	c__Anaerolineae	o__Anaerolineales	f__Anaerolineaceae	g__Longilinea	s__Longilinea arvoryzae
336_0	GCA_001050255	public genome	1	1	0	0	nothing_new_here	p__Chloroflexota	c__Anaerolineae	o__Anaerolineales	f__Anaerolineaceae	g__Levilinea	s__Levilinea saccharolytica
2507_1	GCA_001192795	public genome	7	4	3	0	old+new_onlyMAGsSRA	p__Chloroflexota	c__Anaerolineae	o__Anaerolineales	f__Anaerolineaceae	g__Flexilinea	s__Flexilinea flocculi
1021_9	GCA_001302685	public genome	1	1	0	0	nothing_new_here	p__Chloroflexota	c__Dehalococcoidia	o__SM23-28-2	f__SM23-28-2	g__SM23-28-2	s__
1021_1	GCA_001303545	public genome	1	1	0	0	nothing_new_here	p__Chloroflexota	c__Dehalococcoidia	o__SM23-28-2	f__SM23-28-2	g__SM23-28-2	s__SM23-28-2 sp001303545
321_1	GCA_001306095	public genome	2	1	1	0	old+new_onlyMAGsSRA	p__Chloroflexota	c__Anaerolineae	o__Anaerolineales	f__Anaerolineaceae	g__Leptolinea	s__Leptolinea tardivitalis
2091_1	GCA_001306115	public genome	1	1	0	0	nothing_new_here	p__Chloroflexota	c__Anaerolineae	o__Anaerolineales	f__Anaerolineaceae	g__Ornatilinea	s__Ornatilinea apprima
2038_2	GCA_001306135	public genome	1	1	0	0	nothing_new_here	p__Chloroflexota	c__Chloroflexia	o__Chloroflexales	f__Herpetosiphonaceae	g__Herpetosiphon	s__Herpetosiphon geysericola
553_1	GCA_001306175	public genome	3	2	1	0	old+new_onlyMAGsSRA	p__Chloroflexota	c__Anaerolineae	o__Ardenticatenales	f__Ardenticatenaceae	g__Ardenticatena	s__Ardenticatena maritima
1581_1	GCA_001399705	public genome	1	1	0	0	nothing_new_here	p__Chloroflexota	c__Chloroflexia	o__Chloroflexales	f__Roseiflexaceae	g__Kouleothrix	s__Kouleothrix aurantiaca
1366_0	GCA_001443375	public genome	1	1	0	0	nothing_new_here	p__Chloroflexota	c__Ellin6529	o__CSP1-4	f__CSP1-4	g__CSP1-4	s__CSP1-4 sp001443375
1110_2	GCA_001466665	public genome	1	1	0	0	nothing_new_here	p__Chloroflexota	c__Dehalococcoidia	o__Dehalococcoidales	f__Dehalococcoidaceae	g__Dehalogenimonas	s__Dehalogenimonas alkenigignens
559_0	GCA_001567085	public genome	1	1	0	0	nothing_new_here	p__Chloroflexota	c__Anaerolineae	o__SBR1031	f__A4b	g__OLB15	s__OLB15 sp001567085
2152_8	GCA_001567105	public genome	1	1	0	0	nothing_new_here	p__Chloroflexota	c__Anaerolineae	o__Anaerolineales	f__EnvOPS12	g__OLB14	s__OLB14 sp001567105
766_0	GCA_001602945	public genome	1	1	0	0	nothing_new_here	p__Chloroflexota	c__Anaerolineae	o__UBA1429	f__UBA1429	g__	s__
165_0	GCA_001603795	public genome	1	1	0	0	nothing_new_here	p__Chloroflexota	c__Anaerolineae	o__Anaerolineales	f__Anaerolineaceae	g__Ch10	s__
1564_1	GCA_001650695	public genome	1	1	0	0	nothing_new_here	p__Chloroflexota	c__Chloroflexia	o__Chloroflexales	f__Chloroflexaceae	g__Chloroflexus	s__Chloroflexus islandicus
1364_0	GCA_001794945	public genome	1	1	0	0	nothing_new_here	p__Chloroflexota	c__Ellin6529	o__CSP1-4	f__CSP1-4	g__GWC2-73-18	s__GWC2-73-18 sp001794945
1648_1	GCA_001795035	public genome	1	1	0	0	nothing_new_here	p__Chloroflexota	c__Dehalococcoidia	o__UBA2777	f__RBG-13-53-26	g__RBG-13-53-26	s__RBG-13-53-26 sp001795035
2236_0	GCA_001795065	public genome	1	1	0	0	nothing_new_here	p__Chloroflexota	c__Anaerolineae	o__Anaerolineales	f__E44-bin32	g__	s__
227_1	GCA_001795085	public genome	2	2	0	0	nothing_new_here	p__Chloroflexota	c__Anaerolineae	o__Anaerolineales	f__UBA4823	g__45689	s__
421_0	GCA_001795115	public genome	1	1	0	0	nothing_new_here	p__Chloroflexota	c__Anaerolineae	o__Anaerolineales	f__E44-bin32	g__	s__
1864_0	GCA_001795125	public genome	1	1	0	0	nothing_new_here	p__Chloroflexota	c__Anaerolineae	o__Anaerolineales	f__UBA4823	g__	s__
1135_0	GCA_001795155	public genome	1	1	0	0	nothing_new_here	p__Chloroflexota	c__Anaerolineae	o__UBA4142	f__UBA4142	g__	s__
2017_0	GCA_001795165	public genome	1	1	0	0	nothing_new_here	p__Chloroflexota	c__Anaerolineae	o__Anaerolineales	f__UBA4823	g__RBG-16-57-11	s__RBG-16-57-11 sp001795165
963_0	GCA_001795195	public genome	1	1	0	0	nothing_new_here	p__Chloroflexota	c__Dehalococcoidia	o__Dehalococcoidales	f__UBA2162	g__	s__
593_0	GCA_001795205	public genome	1	1	0	0	nothing_new_here	p__Chloroflexota	c__Dehalococcoidia	o__Dehalococcoidales	f__RBG-16-60-22	g__	s__
1025_1	GCA_001795235	public genome	1	1	0	0	nothing_new_here	p__Chloroflexota	c__Dehalococcoidia	o__SM23-28-2	f__RBG-16-64-32	g__RBG-16-64-32	s__RBG-16-64-32 sp001795235
1405_1	GCA_001795245	public genome	1	1	0	0	nothing_new_here	p__Chloroflexota	c__Ellin6529	o__CSP1-4	f__CSP1-4	g__UBA5189	s__UBA5189 sp001795245
228_1	GCA_001795285	public genome	2	2	0	0	nothing_new_here	p__Chloroflexota	c__Anaerolineae	o__Anaerolineales	f__UBA4823	g__45689	s__
685_5	GCA_001795315	public genome	1	1	0	0	nothing_new_here	p__Chloroflexota	c__Dehalococcoidia	o__GIF9	f__UBA5620	g__9FT-COMBO-48-23	s__9FT-COMBO-48-23 sp001795315
438_0	GCA_001795335	public genome	1	1	0	0	nothing_new_here	p__Chloroflexota	c__Anaerolineae	o__Anaerolineales	f__UBA4823	g__9FT-COMBO-55-16	s__9FT-COMBO-55-16 sp001795335
1331_1	GCA_001795345	public genome	3	3	0	0	nothing_new_here	p__Chloroflexota	c__Ellin6529	o__P2-11E	f__P2-11E	g__GWC2-70-10	s__GWC2-70-10 sp001795345
2505_1	GCA_001796335	public genome	2	2	0	0	nothing_new_here	p__Chloroflexota	c__Anaerolineae	o__Anaerolineales	f__EnvOPS12	g__UBA12087	s__UBA12087 sp001796335
601_1	GCA_001796415	public genome	1	1	0	0	nothing_new_here	p__Chloroflexota	c__Dehalococcoidia	o__Dehalococcoidales	f__UBA2162	g__MGML01	s__MGML01 sp001796415
577_0	GCA_001796495	public genome	1	1	0	0	nothing_new_here	p__Chloroflexota	c__Dehalococcoidia	o__Dehalococcoidales	f__RBG-16-60-22	g__RBG-13-51-18	s__RBG-13-51-18 sp001796495
694_0	GCA_001796515	public genome	1	1	0	0	nothing_new_here	p__Chloroflexota	c__Dehalococcoidia	o__GIF9	f__AB-539-J10	g__RBG-13-51-36	s__RBG-13-51-36 sp001796515
578_0	GCA_001796525	public genome	1	1	0	0	nothing_new_here	p__Chloroflexota	c__Dehalococcoidia	o__Dehalococcoidales	f__RBG-16-60-22	g__RBG-13-51-18	s__RBG-13-51-18 sp001796525
618_0	GCA_001796555	public genome	1	1	0	0	nothing_new_here	p__Chloroflexota	c__Dehalococcoidia	o__Dehalococcoidales	f__RBG-16-60-22	g__	s__
436_0	GCA_001796595	public genome	1	1	0	0	nothing_new_here	p__Chloroflexota	c__Dehalococcoidia	o__UBA2777	f__RBG-13-53-26	g__	s__
796_0	GCA_001796635	public genome	1	1	0	0	nothing_new_here	p__Chloroflexota	c__Anaerolineae	o__UBA1429	f__UBA1429	g__	s__
651_12	GCA_001796655	public genome	1	1	0	0	nothing_new_here	p__Chloroflexota	c__Dehalococcoidia	o__Dehalococcoidales	f__E44-bin88	g__E44-bin88	s__
587_0	GCA_001796675	public genome	1	1	0	0	nothing_new_here	p__Chloroflexota	c__Dehalococcoidia	o__Dehalococcoidales	f__RBG-16-60-22	g__	s__
2252_0	GCA_001796715	public genome	1	1	0	0	nothing_new_here	p__Chloroflexota	c__Anaerolineae	o__Anaerolineales	f__E44-bin32	g__	s__
575_0	GCA_001796755	public genome	1	1	0	0	nothing_new_here	p__Chloroflexota	c__Dehalococcoidia	o__Dehalococcoidales	f__RBG-16-60-22	g__RBG-13-51-18	s__
450_0	GCA_001796765	public genome	1	1	0	0	nothing_new_here	p__Chloroflexota	c__Dehalococcoidia	o__Dehalococcoidales	f__RBG-16-60-22	g__	s__
1684_0	GCA_001796785	public genome	1	1	0	0	nothing_new_here	p__Chloroflexota	c__Anaerolineae	o__Anaerolineales	f__EnvOPS12	g__RBG-16-51-16	s__RBG-16-51-16 sp001796785
970_0	GCA_001796805	public genome	1	1	0	0	nothing_new_here	p__Chloroflexota	c__Dehalococcoidia	o__Dehalococcoidales	f__UBA2162	g__GCA-2685815	s__
233_0	GCA_001796835	public genome	1	1	0	0	nothing_new_here	p__Chloroflexota	c__Anaerolineae	o__Anaerolineales	f__UBA4823	g__DSWF01	s__
595_0	GCA_001796865	public genome	1	1	0	0	nothing_new_here	p__Chloroflexota	c__Dehalococcoidia	o__Dehalococcoidales	f__RBG-16-60-22	g__RBG-16-56-11	s__RBG-16-56-11 sp001796865
592_0	GCA_001796935	public genome	1	1	0	0	nothing_new_here	p__Chloroflexota	c__Dehalococcoidia	o__Dehalococcoidales	f__RBG-16-60-22	g__RBG-16-60-22	s__RBG-16-60-22 sp001796935
2253_0	GCA_001796965	public genome	1	1	0	0	nothing_new_here	p__Chloroflexota	c__Anaerolineae	o__Anaerolineales	f__RBG-16-64-43	g__RBG-16-64-43	s__RBG-16-64-43 sp001796965
947_1	GCA_001796995	public genome	1	1	0	0	nothing_new_here	p__Chloroflexota	c__Dehalococcoidia	o__DSTF01	f__RBG-16-68-14	g__RBG-16-68-14	s__RBG-16-68-14 sp001796995
1404_0	GCA_001797015	public genome	1	1	0	0	nothing_new_here	p__Chloroflexota	c__Ellin6529	o__CSP1-4	f__CSP1-4	g__SPCO01	s__
1384_1	GCA_001797035	public genome	1	1	0	0	nothing_new_here	p__Chloroflexota	c__Ellin6529	o__CSP1-4	f__CSP1-4	g__	s__
1898_0	GCA_001797095	public genome	1	1	0	0	nothing_new_here	p__Chloroflexota	c__Anaerolineae	o__Anaerolineales	f__UBA4823	g__45689	s__
239_0	GCA_001797105	public genome	1	1	0	0	nothing_new_here	p__Chloroflexota	c__Anaerolineae	o__Anaerolineales	f__E44-bin32	g__	s__
1821_1	GCA_001871755	public genome	1	1	0	0	nothing_new_here	p__Chloroflexota	c__Anaerolineae	o__CG2-30-64-16	f__CG2-30-64-16	g__CG2-30-64-16	s__CG2-30-64-16 sp001871755
2172_6	GCA_001871895	public genome	1	1	0	0	nothing_new_here	p__Chloroflexota	c__Anaerolineae	o__Anaerolineales	f__EnvOPS12	g__UBA7227	s__
2237_1	GCA_001872165	public genome	3	3	0	0	nothing_new_here	p__Chloroflexota	c__Anaerolineae	o__Anaerolineales	f__EnvOPS12	g__CG2-30-58-95	s__CG2-30-58-95 sp001872165
2266_3	GCA_001872455	public genome	1	1	0	0	nothing_new_here	p__Chloroflexota	c__Anaerolineae	o__Anaerolineales	f__EnvOPS12	g__UBA8950	s__UBA8950 sp001872455
704_1	GCA_001872925	public genome	4	3	1	0	mostly_old	p__Chloroflexota	c__Dehalococcoidia	o__GIF9	f__AB-539-J10	g__CG2-30-46-19	s__CG2-30-46-19 sp001872925
705_1	GCA_001873005	public genome	3	3	0	0	nothing_new_here	p__Chloroflexota	c__Dehalococcoidia	o__GIF9	f__AB-539-J10	g__CG2-30-46-9	s__CG2-30-46-9 sp001873005
370_0	GCA_001899005	public genome	1	1	0	0	nothing_new_here	p__Chloroflexota	c__Anaerolineae	o__Anaerolineales	f__Anaerolineaceae	g__UBA6170	s__UBA6170 sp001899005
1335_3	GCA_001917735	public genome	1	1	0	0	nothing_new_here	p__Chloroflexota	c__Ellin6529	o__P2-11E	f__P2-11E	g__3-1-20CM-2-70-9	s__3-1-20CM-2-70-9 sp001917735
1422_1	GCA_001917815	public genome	1	1	0	0	nothing_new_here	p__Dormibacterota	c__Dormibacteria	o__Dormibacterales	f__Dormibacteraceae	g__UBA10449	s__UBA10449 sp001917815
230_1	GCA_002010545	public genome	2	2	0	0	nothing_new_here	p__Chloroflexota	c__Anaerolineae	o__E26-bin7	f__JACIWR01	g__	s__
2273_1	GCA_002050125	public genome	2	1	1	0	old+new_onlyMAGsSRA	p__Chloroflexota	c__Anaerolineae	o__Anaerolineales	f__UBA4823	g__UTCFX2	s__UTCFX2 sp002050125
1836_1	GCA_002068755	public genome	1	1	0	0	nothing_new_here	p__Chloroflexota	c__Anaerolineae	o__B4-G1	f__SLSP01	g__JAAZNO01	s__
1824_2	GCA_002068935	public genome	1	1	0	0	nothing_new_here	p__Chloroflexota	c__Anaerolineae	o__CG2-30-64-16	f__CG2-30-64-16	g__MWBF01	s__MWBF01 sp002068935
415_1	GCA_002070215	public genome	5	4	1	0	mostly_old	p__Chloroflexota	c__Anaerolineae	o__UBA2200	f__UBA2200	g__UBA2200	s__UBA2200 sp002070215
2368_0	GCA_002084875	public genome	1	1	0	0	nothing_new_here	p__Chloroflexota	c__Anaerolineae	o__4572-78	f__4572-78	g__4572-78	s__4572-78 sp002084875
1634_1	GCA_002238445	public genome	5	3	2	0	old+new_onlyMAGsSRA	p__Chloroflexota	c__Anaerolineae	o__Caldilineales	f__Caldilineaceae	g__Bin5	s__Bin5 sp002238445
1632_1	GCA_002238555	public genome	3	1	2	0	old+new_onlyMAGsSRA	p__Chloroflexota	c__Anaerolineae	o__Caldilineales	f__Bin34	g__Bin34	s__Bin34 sp002238555
991_1	GCA_002238825	public genome	2	1	1	0	old+new_onlyMAGsSRA	p__Chloroflexota	c__Dehalococcoidia	o__UBA3495	f__UBA3495	g__Bin87	s__Bin87 sp002238825
989_1	GCA_002238855	public genome	2	1	1	0	old+new_onlyMAGsSRA	p__Chloroflexota	c__Dehalococcoidia	o__SAR202	f__UBA11138	g__Bin90	s__Bin90 sp002238855
1766_3	GCA_002292925	public genome	1	1	0	0	nothing_new_here	p__Chloroflexota	c__Chloroflexia	o__Chloroflexales	f__Roseiflexaceae	g__UBA965	s__UBA965 sp002292925
1635_0	GCA_002294405	public genome	1	1	0	0	nothing_new_here	p__Chloroflexota	c__Anaerolineae	o__Anaerolineales	f__EnvOPS12	g__UBA877	s__UBA877 sp002294405
360_0	GCA_002298885	public genome	1	1	0	0	nothing_new_here	p__Chloroflexota	c__Anaerolineae	o__Anaerolineales	f__Anaerolineaceae	g__UBA700	s__UBA700 sp002298885
317_0	GCA_002305635	public genome	1	1	0	0	nothing_new_here	p__Chloroflexota	c__Anaerolineae	o__Anaerolineales	f__Anaerolineaceae	g__T78	s__T78 sp002305635
809_0	GCA_002311285	public genome	1	1	0	0	nothing_new_here	p__Chloroflexota	c__Dehalococcoidia	o__SAR202	f__UBA2962	g__UBA2962	s__UBA2962 sp002311285
1091_1	GCA_002311385	public genome	2	2	0	0	nothing_new_here	p__Chloroflexota	c__Dehalococcoidia	o__UBA3495	f__UBA3495	g__UBA1141	s__UBA1141 sp002311385
211_4	GCA_002311455	public genome	1	1	0	0	nothing_new_here	p__Chloroflexota	c__Anaerolineae	o__Anaerolineales	f__UBA11657	g__UBA11657	s__UBA11657 sp002311455
1663_0	GCA_002311865	public genome	1	1	0	0	nothing_new_here	p__Chloroflexota	c__Dehalococcoidia	o__UBA1151	f__UBA1151	g__UBA1151	s__UBA1151 sp002311865
1165_0	GCA_002327925	public genome	1	1	0	0	nothing_new_here	p__Chloroflexota	c__Anaerolineae	o__UBA2200	f__UBA2200	g__UBA2200	s__UBA2200 sp002327925
237_0	GCA_002328075	public genome	1	1	0	0	nothing_new_here	p__Chloroflexota	c__Anaerolineae	o__Promineofilales	f__UBA4811	g__UBA4811	s__UBA4811 sp002328075
764_0	GCA_002329325	public genome	1	1	0	0	nothing_new_here	p__Chloroflexota	c__Anaerolineae	o__UBA1429	f__UBA1429	g__UBA1429	s__UBA1429 sp002329325
2532_2	GCA_002339805	public genome	1	1	0	0	nothing_new_here	p__Chloroflexota	c__Dehalococcoidia	o__UBA3495	f__UBA2588	g__UBA2588	s__UBA2588 sp002339805
2152_4	GCA_002345215	public genome	2	2	0	0	nothing_new_here	p__Chloroflexota	c__Anaerolineae	o__Anaerolineales	f__EnvOPS12	g__OLB14	s__OLB14 sp002345215
351_0	GCA_002347485	public genome	1	1	0	0	nothing_new_here	p__Chloroflexota	c__Anaerolineae	o__Anaerolineales	f__Anaerolineaceae	g__UBA6107	s__UBA6107 sp002347485
482_1	GCA_002347845	public genome	1	1	0	0	nothing_new_here	p__Chloroflexota	c__Dehalococcoidia	o__GIF9	f__UBA5629	g__UBA6808	s__UBA6808 sp002383665
1761_0	GCA_002348045	public genome	1	1	0	0	nothing_new_here	p__Chloroflexota	c__Anaerolineae	o__UBA2200	f__UBA2200	g__UBA2232	s__UBA2232 sp002348045
1655_1	GCA_002352365	public genome	2	2	0	0	nothing_new_here	p__Chloroflexota	c__Dehalococcoidia	o__UBA2777	f__UBA2777	g__UBA2777	s__UBA2777 sp002352365
2135_0	GCA_002362735	public genome	1	1	0	0	nothing_new_here	p__Chloroflexota	c__Dehalococcoidia	o__Dehalococcoidales	f__UBA3254	g__UBA3254	s__UBA3254 sp002362735
599_0	GCA_002382615	public genome	1	1	0	0	nothing_new_here	p__Chloroflexota	c__Dehalococcoidia	o__Dehalococcoidales	f__Dehalococcoidaceae	g__UBA4087	s__UBA4087 sp002382615
284_1	GCA_002383615	public genome	1	1	0	0	nothing_new_here	p__Chloroflexota	c__Anaerolineae	o__Anaerolineales	f__Anaerolineaceae	g__UBA4081	s__UBA4081 sp002383615
295_2	GCA_002399085	public genome	1	1	0	0	nothing_new_here	p__Chloroflexota	c__Anaerolineae	o__Anaerolineales	f__Anaerolineaceae	g__T78	s__T78 sp002399085
942_3	GCA_002401285	public genome	4	4	0	0	nothing_new_here	p__Chloroflexota	c__Dehalococcoidia	o__UBA3495	f__UBA3495	g__UBA11650	s__UBA11650 sp002401285
170_0	GCA_002402275	public genome	1	1	0	0	nothing_new_here	p__Chloroflexota	c__Anaerolineae	o__Anaerolineales	f__UBA4823	g__UBA4823	s__UBA4823 sp002402275
352_0	GCA_002402725	public genome	1	1	0	0	nothing_new_here	p__Chloroflexota	c__Anaerolineae	o__Anaerolineales	f__Anaerolineaceae	g__UBA6107	s__UBA6107 sp002402725
521_0	GCA_002403105	public genome	1	1	0	0	nothing_new_here	p__Chloroflexota	c__Anaerolineae	o__Anaerolineales	f__Anaerolineaceae	g__UBA4781	s__UBA4781 sp002403105
269_0	GCA_002403205	public genome	1	1	0	0	nothing_new_here	p__Chloroflexota	c__Anaerolineae	o__Anaerolineales	f__Anaerolineaceae	g__Brevefilum	s__Brevefilum sp002403205
1459_2	GCA_002404015	public genome	1	1	0	0	nothing_new_here	p__Dormibacterota	c__Dormibacteria	o__Dormibacterales	f__Dormibacteraceae	g__UBA4736	s__UBA4736 sp002404015
1321_2	GCA_002404035	public genome	1	1	0	0	nothing_new_here	p__Chloroflexota	c__Ellin6529	o__P2-11E	f__P2-11E	g__UBA4735	s__UBA4735 sp002404155
2103_0	GCA_002407845	public genome	1	1	0	0	nothing_new_here	p__Chloroflexota	c__Anaerolineae	o__Anaerolineales	f__Anaerolineaceae	g__Flexilinea	s__Flexilinea sp002407845
285_1	GCA_002409015	public genome	6	6	0	0	nothing_new_here	p__Chloroflexota	c__Anaerolineae	o__Anaerolineales	f__Anaerolineaceae	g__T78	s__T78 sp002409625
295_3	GCA_002410005	public genome	1	1	0	0	nothing_new_here	p__Chloroflexota	c__Anaerolineae	o__Anaerolineales	f__Anaerolineaceae	g__T78	s__T78 sp002409365
557_1	GCA_002412595	public genome	1	1	0	0	nothing_new_here	p__Chloroflexota	c__Anaerolineae	o__Anaerolineales	f__Anaerolineaceae	g__Pelolinea	s__Pelolinea sp002412595
163_0	GCA_002412765	public genome	1	1	0	0	nothing_new_here	p__Chloroflexota	c__Anaerolineae	o__Anaerolineales	f__Anaerolineaceae	g__UBA5203	s__UBA5203 sp002412765
2098_0	GCA_002412925	public genome	1	1	0	0	nothing_new_here	p__Chloroflexota	c__Anaerolineae	o__Anaerolineales	f__EnvOPS12	g__UBA5195	s__UBA5195 sp002412925
2461_1	GCA_002413265	public genome	2	2	0	0	nothing_new_here	p__Chloroflexota	c__UBA5177	o__UBA5177	f__UBA5177	g__UBA5177	s__UBA5177 sp002413265
431_0	GCA_002415895	public genome	1	1	0	0	nothing_new_here	p__Chloroflexota	c__Anaerolineae	o__Caldilineales	f__Caldilineaceae	g__UBA5069	s__UBA5069 sp002415895
310_5	GCA_002417685	public genome	1	1	0	0	nothing_new_here	p__Chloroflexota	c__Anaerolineae	o__Anaerolineales	f__Anaerolineaceae	g__49-20	s__49-20 sp002417685
2170_3	GCA_002418205	public genome	1	1	0	0	nothing_new_here	p__Chloroflexota	c__Anaerolineae	o__Anaerolineales	f__EnvOPS12	g__UBA12294	s__UBA12294 sp002418205
2238_2	GCA_002418215	public genome	1	1	0	0	nothing_new_here	p__Chloroflexota	c__Anaerolineae	o__Anaerolineales	f__EnvOPS12	g__UBA5796	s__UBA5796 sp002418215
759_3	GCA_002418895	public genome	1	1	0	0	nothing_new_here	p__Chloroflexota	c__Dehalococcoidia	o__Dehalococcoidales	f__UBA5760	g__UBA5760	s__UBA5760 sp002418895
611_1	GCA_002419135	public genome	3	3	0	0	nothing_new_here	p__Chloroflexota	c__Dehalococcoidia	o__Dehalococcoidales	f__UBA5627	g__UBA5627	s__UBA5627 sp002419135
471_1	GCA_002421445	public genome	1	1	0	0	nothing_new_here	p__Chloroflexota	c__Dehalococcoidia	o__GIF9	f__UBA5629	g__UBA5629	s__UBA5629 sp002421445
611_3	GCA_002421585	public genome	1	1	0	0	nothing_new_here	p__Chloroflexota	c__Dehalococcoidia	o__Dehalococcoidales	f__UBA5627	g__UBA5627	s__UBA5627 sp002421585
2312_1	GCA_002423325	public genome	1	1	0	0	nothing_new_here	p__Chloroflexota	c__Anaerolineae	o__UBA1429	f__UBA1429	g__UBA6128	s__UBA6128 sp002423325
300_6	GCA_002423495	public genome	1	1	0	0	nothing_new_here	p__Chloroflexota	c__Anaerolineae	o__Anaerolineales	f__Anaerolineaceae	g__T78	s__T78 sp002423495
630_0	GCA_002423605	public genome	1	1	0	0	nothing_new_here	p__Chloroflexota	c__Dehalococcoidia	o__GIF9	f__UBA5620	g__UBA5620	s__UBA5620 sp002423605
257_2	GCA_002428455	public genome	1	1	0	0	nothing_new_here	p__Chloroflexota	c__Anaerolineae	o__Anaerolineales	f__Anaerolineaceae	g__UBA6107	s__UBA6107 sp002428455
2058_0	GCA_002428565	public genome	1	1	0	0	nothing_new_here	p__Chloroflexota	c__Anaerolineae	o__Anaerolineales	f__UBA4823	g__UBA6092	s__UBA6092 sp002428565
2516_0	GCA_002428985	public genome	1	1	0	0	nothing_new_here	p__Chloroflexota	c__Anaerolineae	o__SBR1031	f__A4b	g__UBA6055	s__UBA6055 sp002428985
300_2	GCA_002435825	public genome	1	1	0	0	nothing_new_here	p__Chloroflexota	c__Anaerolineae	o__Anaerolineales	f__Anaerolineaceae	g__T78	s__T78 sp002435825
413_0	GCA_002435875	public genome	1	1	0	0	nothing_new_here	p__Chloroflexota	c__Anaerolineae	o__UBA2200	f__UBA2200	g__UBA6131	s__UBA6131 sp002435875
284_2	GCA_002436005	public genome	1	1	0	0	nothing_new_here	p__Chloroflexota	c__Anaerolineae	o__Anaerolineales	f__Anaerolineaceae	g__Brevefilum	s__Brevefilum sp002436005
2342_0	GCA_002436065	public genome	1	1	0	0	nothing_new_here	p__Chloroflexota	c__UBA6077	o__UBA6077	f__UBA6077	g__UBA6077	s__UBA6077 sp002436065
1516_0	GCA_002440805	public genome	1	1	0	0	nothing_new_here	p__Chloroflexota	c__Chloroflexia	o__Thermomicrobiales	f__UBA6265	g__UBA6265	s__UBA6265 sp002440805
483_0	GCA_002440925	public genome	1	1	0	0	nothing_new_here	p__Chloroflexota	c__Dehalococcoidia	o__GIF9	f__AB-539-J10	g__UBA6803	s__UBA6803 sp002452795
482_2	GCA_002441015	public genome	1	1	0	0	nothing_new_here	p__Chloroflexota	c__Dehalococcoidia	o__GIF9	f__UBA5629	g__UBA6808	s__UBA6808 sp002452695
2533_1	GCA_002450515	public genome	3	3	0	0	nothing_new_here	p__Chloroflexota	c__Dehalococcoidia	o__UBA6952	f__UBA6952	g__UBA6952	s__UBA6952 sp002450515
270_0	GCA_002452315	public genome	1	1	0	0	nothing_new_here	p__Chloroflexota	c__Anaerolineae	o__Anaerolineales	f__Anaerolineaceae	g__Brevefilum	s__Brevefilum sp002452315
176_0	GCA_002455215	public genome	1	1	0	0	nothing_new_here	p__Chloroflexota	c__Anaerolineae	o__Anaerolineales	f__UBA6668	g__UBA6668	s__UBA6668 sp002455215
1679_1	GCA_002455335	public genome	1	1	0	0	nothing_new_here	p__Chloroflexota	c__Anaerolineae	o__Anaerolineales	f__UBA6663	g__UBA6663	s__UBA6663 sp002455335
1628_1	GCA_002455955	public genome	1	1	0	0	nothing_new_here	p__Chloroflexota	c__Dehalococcoidia	o__UBA2979	f__UBA2979	g__UBA6627	s__UBA6627 sp002455955
1574_2	GCA_002532075	public genome	1	1	0	0	nothing_new_here	p__Chloroflexota	c__Chloroflexia	o__Chloroflexales	f__Chloroflexaceae	g__Chloroploca	s__Chloroploca asiatica
1560_1	GCA_002532535	public genome	1	1	0	0	nothing_new_here	p__Chloroflexota	c__Chloroflexia	o__Chloroflexales	f__Chloroflexaceae	g__Viridilinea	s__Viridilinea mediisalina
1302_6	GCA_002563855	public genome	2	1	1	0	old+new_onlyMAGsSRA	p__Chloroflexota	c__Dehalococcoidia	o__UBA2991	f__UBA2991	g__Tepidiforma	s__Tepidiforma sp002563855
669_1	GCA_002685815	public genome	3	3	0	0	nothing_new_here	p__Chloroflexota	c__Dehalococcoidia	o__Dehalococcoidales	f__UBA2162	g__GCA-2685815	s__GCA-2685815 sp002685815
653_0	GCA_002688105	public genome	1	1	0	0	nothing_new_here	p__Chloroflexota	c__Dehalococcoidia	o__Dehalococcoidales	f__UBA5760	g__GCA-2688105	s__GCA-2688105 sp002688105
662_1	GCA_002688435	public genome	1	1	0	0	nothing_new_here	p__Chloroflexota	c__Dehalococcoidia	o__Dehalococcoidales	f__RBG-16-60-22	g__GCA-2688435	s__GCA-2688435 sp002688435
1109_0	GCA_002688445	public genome	1	1	0	0	nothing_new_here	p__Chloroflexota	c__UBA2235	o__UBA12225	f__	g__	s__
539_1	GCA_002690375	public genome	1	1	0	0	nothing_new_here	p__Chloroflexota	c__Dehalococcoidia	o__Dehalococcoidales	f__ARS1013	g__ARS1013	s__ARS1013 sp002690375
939_1	GCA_002694895	public genome	3	3	0	0	nothing_new_here	p__Chloroflexota	c__Dehalococcoidia	o__SAR202	f__GCA-002694895	g__GCA-002694895	s__GCA-002694895 sp002694895
2533_3	GCA_002697585	public genome	1	1	0	0	nothing_new_here	p__Chloroflexota	c__Dehalococcoidia	o__UBA6952	f__UBA6952	g__UBA6952	s__
2550_1	GCA_002698345	public genome	2	2	0	0	nothing_new_here	p__Chloroflexota	c__Dehalococcoidia	o__UBA1151	f__TMED-70	g__GCA-2718455	s__
1949_3	GCA_002699125	public genome	1	1	0	0	nothing_new_here	p__Chloroflexota	c__Anaerolineae	o__Promineofilales	f__Promineofilaceae	g__GCA-2699125	s__GCA-2699125 sp002699125
808_3	GCA_002699485	public genome	1	1	0	0	nothing_new_here	p__Chloroflexota	c__Dehalococcoidia	o__SAR202	f__UBA2962	g__UBA2962	s__UBA2962 sp002699485
1940_2	GCA_002699585	public genome	1	1	0	0	nothing_new_here	p__Chloroflexota	c__Anaerolineae	o__SBR1031	f__A4b	g__GCA-2699585	s__GCA-2699585 sp002699585
2556_0	GCA_002700125	public genome	1	1	0	0	nothing_new_here	p__Chloroflexota	c__Dehalococcoidia	o__UBA1151	f__TMED-70	g__GCA-002700125	s__GCA-002700125 sp002700125
886_1	GCA_002701625	public genome	2	2	0	0	nothing_new_here	p__Chloroflexota	c__Dehalococcoidia	o__UBA2979	f__UBA2979	g__UBA2979	s__UBA2979 sp002701625
751_2	GCA_002701805	public genome	2	2	0	0	nothing_new_here	p__Chloroflexota	c__Dehalococcoidia	o__UBA1151	f__Bin127	g__GCA-002708145	s__GCA-002708145 sp002728715
1959_0	GCA_002702065	public genome	1	1	0	0	nothing_new_here	p__Chloroflexota	c__Anaerolineae	o__SBR1031	f__A4b	g__GCA-2702065	s__GCA-2702065 sp002702065
340_0	GCA_002702705	public genome	1	1	0	0	nothing_new_here	p__Chloroflexota	c__Anaerolineae	o__Anaerolineales	f__Anaerolineaceae	g__UBA6170	s__UBA6170 sp002702705
808_4	GCA_002705245	public genome	2	2	0	0	nothing_new_here	p__Chloroflexota	c__Dehalococcoidia	o__SAR202	f__UBA2962	g__UBA2962	s__
981_1	GCA_002707185	public genome	1	1	0	0	nothing_new_here	p__Chloroflexota	c__Dehalococcoidia	o__UBA3495	f__UBA3495	g__GCA-2707185	s__GCA-2707185 sp002707185
1264_1	GCA_002707835	public genome	1	1	0	0	nothing_new_here	p__Chloroflexota	c__Dehalococcoidia	o__UBA2979	f__UBA2979	g__UBA6955	s__UBA6955 sp002707835
86_1	GCA_002707955	public genome	7	7	0	0	nothing_new_here	p__Chloroflexota	c__Dehalococcoidia	o__SAR202	f__UBA826	g__AG-426-M11	s__AG-426-M11 sp003213095
980_1	GCA_002708065	public genome	3	3	0	0	nothing_new_here	p__Chloroflexota	c__Dehalococcoidia	o__SAR202	f__UBA826	g__UBA11795	s__UBA11795 sp002708065
2551_1	GCA_002708085	public genome	1	1	0	0	nothing_new_here	p__Chloroflexota	c__Dehalococcoidia	o__UBA1151	f__TMED-70	g__GCA-2721615	s__GCA-2721615 sp002708085
751_4	GCA_002708145	public genome	1	1	0	0	nothing_new_here	p__Chloroflexota	c__Dehalococcoidia	o__UBA1151	f__Bin127	g__GCA-002708145	s__GCA-002708145 sp002708145
982_2	GCA_002708495	public genome	2	2	0	0	nothing_new_here	p__Chloroflexota	c__Dehalococcoidia	o__SAR202	f__UBA826	g__UBA11996	s__UBA11996 sp002708495
2548_2	GCA_002710135	public genome	1	1	0	0	nothing_new_here	p__Chloroflexota	c__Dehalococcoidia	o__UBA1151	f__TMED-70	g__TMED-70	s__TMED-70 sp002710135
942_2	GCA_002710215	public genome	3	3	0	0	nothing_new_here	p__Chloroflexota	c__Dehalococcoidia	o__UBA3495	f__UBA3495	g__UBA11650	s__UBA11650 sp002710215
2534_1	GCA_002710905	public genome	1	1	0	0	nothing_new_here	p__Chloroflexota	c__Dehalococcoidia	o__UBA2979	f__UBA2979	g__GCA-002718395	s__GCA-002718395 sp002710905
1100_3	GCA_002711865	public genome	5	5	0	0	nothing_new_here	p__Chloroflexota	c__Dehalococcoidia	o__UBA3495	f__UBA3495	g__UBA9611	s__UBA9611 sp002698265
751_1	GCA_002712125	public genome	2	2	0	0	nothing_new_here	p__Chloroflexota	c__Dehalococcoidia	o__UBA1151	f__Bin127	g__GCA-002708145	s__GCA-002708145 sp002712125
2520_1	GCA_002712585	public genome	1	1	0	0	nothing_new_here	p__Chloroflexota	c__Dehalococcoidia	o__UBA3495	f__GCA-2712585	g__GCA-2712585	s__GCA-2712585 sp002712585
725_1	GCA_002713775	public genome	3	3	0	0	nothing_new_here	p__Chloroflexota	c__Dehalococcoidia	o__UBA2963	f__UBA2963	g__UBA2963	s__UBA2963 sp002719715
751_3	GCA_002714425	public genome	1	1	0	0	nothing_new_here	p__Chloroflexota	c__Dehalococcoidia	o__UBA1151	f__Bin127	g__GCA-002708145	s__GCA-002708145 sp002714425
940_1	GCA_002715665	public genome	3	3	0	0	nothing_new_here	p__Chloroflexota	c__Dehalococcoidia	o__SAR202	f__GCA-002694895	g__GCA-002694895	s__GCA-002694895 sp002715665
1264_2	GCA_002716405	public genome	1	1	0	0	nothing_new_here	p__Chloroflexota	c__Dehalococcoidia	o__UBA2979	f__UBA2979	g__UBA6955	s__UBA6955 sp002716405
1628_2	GCA_002716605	public genome	1	1	0	0	nothing_new_here	p__Chloroflexota	c__UBA11872	o__UBA11872	f__UBA11872	g__UBA11872	s__UBA11872 sp002433065
2552_1	GCA_002716865	public genome	2	2	0	0	nothing_new_here	p__Chloroflexota	c__Dehalococcoidia	o__UBA1151	f__TMED-70	g__GCA-002700125	s__GCA-002700125 sp009392285
2370_0	GCA_002717385	public genome	1	1	0	0	nothing_new_here	p__Chloroflexota	c__Dehalococcoidia	o__UBA1151	f__Bin127	g__GCA-2717385	s__GCA-2717385 sp002717385
999_1	GCA_002717465	public genome	2	2	0	0	nothing_new_here	p__Chloroflexota	c__Dehalococcoidia	o__SAR202	f__UBA826	g__GCA-2717465	s__GCA-2717465 sp002717465
768_0	GCA_002717585	public genome	1	1	0	0	nothing_new_here	p__Chloroflexota	c__Dehalococcoidia	o__UBA1151	f__Bin127	g__UBA1328	s__UBA1328 sp002306745
985_1	GCA_002717725	public genome	3	3	0	0	nothing_new_here	p__Chloroflexota	c__Dehalococcoidia	o__SAR202	f__UBA6927	g__UBA6927	s__UBA6927 sp002717725
985_2	GCA_002717925	public genome	1	1	0	0	nothing_new_here	p__Chloroflexota	c__Dehalococcoidia	o__UBA1127	f__UBA1127	g__GCA-2717925	s__GCA-2717925 sp002717925
84_1	GCA_002718095	public genome	6	6	0	0	nothing_new_here	p__Chloroflexota	c__Dehalococcoidia	o__SAR202	f__UBA826	g__UBA826	s__UBA826 sp002718095
2534_3	GCA_002718395	public genome	1	1	0	0	nothing_new_here	p__Chloroflexota	c__Dehalococcoidia	o__UBA2979	f__UBA2979	g__GCA-002718395	s__GCA-002718395 sp002718395
2371_0	GCA_002718415	public genome	1	1	0	0	nothing_new_here	p__Chloroflexota	c__Dehalococcoidia	o__UBA1151	f__Bin127	g__GCA-2718415	s__GCA-2718415 sp002718415
2550_2	GCA_002718455	public genome	1	1	0	0	nothing_new_here	p__Chloroflexota	c__Dehalococcoidia	o__UBA1151	f__TMED-70	g__GCA-2718455	s__GCA-2718455 sp002718455
2548_1	GCA_002719295	public genome	2	2	0	0	nothing_new_here	p__Chloroflexota	c__Dehalococcoidia	o__UBA1151	f__TMED-70	g__TMED-70	s__TMED-70 sp002711965
2545_2	GCA_002719425	public genome	1	1	0	0	nothing_new_here	p__Chloroflexota	c__Dehalococcoidia	o__UBA1151	f__TMED-70	g__TMED-70	s__TMED-70 sp002719425
2537_1	GCA_002719675	public genome	1	1	0	0	nothing_new_here	p__Chloroflexota	c__Dehalococcoidia	o__SAR202	f__GCA-2719675	g__GCA-2719675	s__GCA-2719675 sp002719675
740_1	GCA_002719775	public genome	2	2	0	0	nothing_new_here	p__Chloroflexota	c__Dehalococcoidia	o__UBA2963	f__UBA2963	g__GCA-2719775	s__GCA-2719775 sp002719775
885_2	GCA_002720365	public genome	1	1	0	0	nothing_new_here	p__Chloroflexota	c__Dehalococcoidia	o__UBA2979	f__UBA2979	g__UBA2979	s__UBA2979 sp002348225
2554_0	GCA_002721055	public genome	1	1	0	0	nothing_new_here	p__Chloroflexota	c__Dehalococcoidia	o__UBA1151	f__TMED-70	g__GCA-002700125	s__
2529_1	GCA_002721445	public genome	1	1	0	0	nothing_new_here	p__Chloroflexota	c__Dehalococcoidia	o__SAR202	f__GCA-002723415	g__GCA-002723415	s__GCA-002723415 sp002721445
2551_2	GCA_002721615	public genome	1	1	0	0	nothing_new_here	p__Chloroflexota	c__Dehalococcoidia	o__UBA1151	f__TMED-70	g__GCA-2721615	s__GCA-2721615 sp002721615
2552_2	GCA_002721675	public genome	1	1	0	0	nothing_new_here	p__Chloroflexota	c__Dehalococcoidia	o__UBA1151	f__TMED-70	g__GCA-002700125	s__GCA-002700125 sp002721675
2546_3	GCA_002721875	public genome	1	1	0	0	nothing_new_here	p__Chloroflexota	c__Dehalococcoidia	o__UBA1151	f__TMED-70	g__TMED-70	s__TMED-70 sp002721875
983_1	GCA_002722155	public genome	1	1	0	0	nothing_new_here	p__Chloroflexota	c__Dehalococcoidia	o__SAR202	f__UBA826	g__UBA11996	s__UBA11996 sp002722155
2552_3	GCA_002723375	public genome	3	3	0	0	nothing_new_here	p__Chloroflexota	c__Dehalococcoidia	o__UBA1151	f__TMED-70	g__GCA-002700125	s__GCA-002700125 sp002723375
2529_2	GCA_002723415	public genome	1	1	0	0	nothing_new_here	p__Chloroflexota	c__Dehalococcoidia	o__SAR202	f__GCA-002723415	g__GCA-002723415	s__GCA-002723415 sp002723415
741_2	GCA_002724585	public genome	1	1	0	0	nothing_new_here	p__Chloroflexota	c__Dehalococcoidia	o__UBA3495	f__UBA3495	g__UBA3495	s__UBA3495 sp002724585
832_4	GCA_002725925	public genome	1	1	0	0	nothing_new_here	p__Chloroflexota	c__Dehalococcoidia	o__UBA1151	f__Bin127	g__GCA-002725925	s__GCA-002725925 sp002725925
211_2	GCA_002727295	public genome	3	3	0	0	nothing_new_here	p__Chloroflexota	c__Anaerolineae	o__Anaerolineales	f__UBA11657	g__UBA11657	s__UBA11657 sp002377585
2553_3	GCA_002727785	public genome	1	1	0	0	nothing_new_here	p__Chloroflexota	c__Dehalococcoidia	o__UBA1151	f__TMED-70	g__GCA-002700125	s__
2534_2	GCA_002727935	public genome	1	1	0	0	nothing_new_here	p__Chloroflexota	c__Dehalococcoidia	o__UBA2979	f__UBA2979	g__GCA-002718395	s__
1098_1	GCA_002730485	public genome	1	1	0	0	nothing_new_here	p__Chloroflexota	c__Dehalococcoidia	o__UBA3495	f__UBA3495	g__UBA9611	s__UBA9611 sp002730485
830_1	GCA_002730555	public genome	2	2	0	0	nothing_new_here	p__Chloroflexota	c__Dehalococcoidia	o__UBA1151	f__UBA1151	g__GCA-2730555	s__GCA-2730555 sp002730555
939_3	GCA_002730715	public genome	1	1	0	0	nothing_new_here	p__Chloroflexota	c__Dehalococcoidia	o__SAR202	f__GCA-002694895	g__GCA-002694895	s__
2369_1	GCA_002730795	public genome	2	2	0	0	nothing_new_here	p__Chloroflexota	c__Dehalococcoidia	o__UBA1151	f__Bin127	g__GCA-2730795	s__GCA-2730795 sp002730795
1100_2	GCA_002746355	public genome	4	4	0	0	nothing_new_here	p__Chloroflexota	c__Dehalococcoidia	o__UBA3495	f__UBA3495	g__UBA9611	s__UBA9611 sp002746355
427_1	GCA_002748985	public genome	2	2	0	0	nothing_new_here	p__Chloroflexota	c__Anaerolineae	o__Promineofilales	f__Promineofilaceae	g__GCA-2746795	s__GCA-2746795 sp002746795
446_0	GCA_002779515	public genome	1	1	0	0	nothing_new_here	p__Chloroflexota	c__Dehalococcoidia	o__SZUA-161	f__SpSt-899	g__	s__
1120_1	GCA_002794515	public genome	3	1	2	0	old+new_onlyMAGsSRA	p__Chloroflexota	c__Anaerolineae	o__SBR1031	f__A4b	g__GCA-2794515	s__GCA-2794515 sp002794515
1935_0	GCA_002794695	public genome	1	1	0	0	nothing_new_here	p__Chloroflexota	c__Anaerolineae	o__SBR1031	f__A4b	g__OLB15	s__
1125_2	GCA_002794705	public genome	1	1	0	0	nothing_new_here	p__Chloroflexota	c__Anaerolineae	o__SBR1031	f__UBA2796	g__CP2-2F	s__CP2-2F sp002794705
1092_0	GCA_002816455	public genome	1	1	0	0	nothing_new_here	p__Chloroflexota	c__Dehalococcoidia	o__UBA3495	f__UBA3495	g__UBA1141	s__UBA1141 sp002816455
1095_0	GCA_002816575	public genome	1	1	0	0	nothing_new_here	p__Chloroflexota	c__Dehalococcoidia	o__UBA3495	f__UBA3495	g__UBA9611	s__UBA9611 sp002816575
1102_1	GCA_002816585	public genome	1	1	0	0	nothing_new_here	p__Chloroflexota	c__Dehalococcoidia	o__UBA3495	f__UBA3495	g__UBA9611	s__UBA9611 sp002816585
964_0	GCA_002816705	public genome	1	1	0	0	nothing_new_here	p__Chloroflexota	c__Dehalococcoidia	o__SAR202	f__UBA11138	g__Casp-Chloro-G4	s__Casp-Chloro-G4 sp002816705
1070_0	GCA_002816715	public genome	1	1	0	0	nothing_new_here	p__Chloroflexota	c__Dehalococcoidia	o__UBA3495	f__UBA3495	g__Casp-Chloro-G3	s__Casp-Chloro-G3 sp002816715
1081_1	GCA_002816875	public genome	1	1	0	0	nothing_new_here	p__Chloroflexota	c__Dehalococcoidia	o__UBA3495	f__UBA3495	g__Io17-Chloro-G2	s__Io17-Chloro-G2 sp002816875
1093_0	GCA_002817055	public genome	1	1	0	0	nothing_new_here	p__Chloroflexota	c__Dehalococcoidia	o__UBA3495	f__UBA3495	g__UBA1141	s__UBA1141 sp002817055
1292_1	GCA_002840675	public genome	1	1	0	0	nothing_new_here	p__Chloroflexota	c__Dehalococcoidia	o__UBA2979	f__UBA2979	g__W-Chloroflexi-9	s__W-Chloroflexi-9 sp002840675
2261_1	GCA_002840685	public genome	1	1	0	0	nothing_new_here	p__Chloroflexota	c__Anaerolineae	o__Anaerolineales	f__EnvOPS12	g__UBA8950	s__UBA8950 sp002840685
357_0	GCA_002840715	public genome	1	1	0	0	nothing_new_here	p__Chloroflexota	c__Anaerolineae	o__Anaerolineales	f__Anaerolineaceae	g__UBA6107	s__UBA6107 sp002840715
342_3	GCA_002840735	public genome	3	3	0	0	nothing_new_here	p__Chloroflexota	c__Anaerolineae	o__Anaerolineales	f__Anaerolineaceae	g__UBA6170	s__UBA6170 sp002840735
339_0	GCA_002840755	public genome	1	1	0	0	nothing_new_here	p__Chloroflexota	c__Anaerolineae	o__Anaerolineales	f__Anaerolineaceae	g__UBA6170	s__UBA6170 sp002840755
373_1	GCA_002841995	public genome	1	1	0	0	nothing_new_here	p__Chloroflexota	c__Anaerolineae	o__Anaerolineales	f__Anaerolineaceae	g__UBA6170	s__UBA6170 sp002841995
342_4	GCA_002842045	public genome	1	1	0	0	nothing_new_here	p__Chloroflexota	c__Anaerolineae	o__Anaerolineales	f__Anaerolineaceae	g__UBA6170	s__UBA6170 sp002842045
1821_2	GCA_002842085	public genome	1	1	0	0	nothing_new_here	p__Chloroflexota	c__Anaerolineae	o__CG2-30-64-16	f__CG2-30-64-16	g__CG2-30-64-16	s__CG2-30-64-16 sp002842085
1740_5	GCA_002898735	public genome	2	1	1	0	old+new_onlyMAGsSRA	p__Chloroflexota	c__Anaerolineae	o__Thermoflexales	f__Thermoflexaceae	g__Thermoflexus	s__Thermoflexus sp002898735
1299_1	GCA_003104995	public genome	2	2	0	0	nothing_new_here	p__Chloroflexota	c__Dehalococcoidia	o__UBA2991	f__UBA2991	g__41671	s__FeB-14 sp003104995
1681_0	GCA_003105035	public genome	1	1	0	0	nothing_new_here	p__Chloroflexota	c__Anaerolineae	o__Anaerolineales	f__UBA4823	g__45689	s__FEB-25 sp003105035
2027_1	GCA_003130835	public genome	2	1	1	0	old+new_onlyMAGsSRA	p__Chloroflexota	c__Anaerolineae	o__Anaerolineales	f__UBA4823	g__NAK19	s__NAK19 sp003130835
2268_0	GCA_003130845	public genome	1	1	0	0	nothing_new_here	p__Chloroflexota	c__Anaerolineae	o__Anaerolineales	f__EnvOPS12	g__UBA5195	s__UBA5195 sp003130845
1605_4	GCA_003130875	public genome	1	1	0	0	nothing_new_here	p__Chloroflexota	c__Anaerolineae	o__4572-78	f__NAK82	g__NAK82	s__NAK82 sp003130875
1462_1	GCA_003131685	public genome	1	1	0	0	nothing_new_here	p__Dormibacterota	c__Dormibacteria	o__UBA8260	f__UBA8260	g__Palsa-851	s__Palsa-851 sp003131685
1381_0	GCA_003132045	public genome	1	1	0	0	nothing_new_here	p__Chloroflexota	c__Ellin6529	o__CSP1-4	f__CSP1-4	g__Fen-1039	s__
1458_1	GCA_003132265	public genome	5	5	0	0	nothing_new_here	p__Dormibacterota	c__Dormibacteria	o__UBA8260	f__Bog-877	g__Bog-877	s__Bog-877 sp003132265
1462_3	GCA_003132525	public genome	1	1	0	0	nothing_new_here	p__Dormibacterota	c__Dormibacteria	o__UBA8260	f__UBA8260	g__Palsa-851	s__Palsa-851 sp003132525
1462_4	GCA_003132805	public genome	1	1	0	0	nothing_new_here	p__Dormibacterota	c__Dormibacteria	o__UBA8260	f__UBA8260	g__Palsa-851	s__Palsa-851 sp003132805
1458_2	GCA_003133485	public genome	1	1	0	0	nothing_new_here	p__Dormibacterota	c__Dormibacteria	o__UBA8260	f__Bog-877	g__Bog-877	s__Bog-877 sp003133485
1447_3	GCA_003135255	public genome	1	1	0	0	nothing_new_here	p__Dormibacterota	c__Dormibacteria	o__UBA8260	f__UBA8260	g__UBA8260	s__UBA8260 sp003135255
1462_6	GCA_003135895	public genome	1	1	0	0	nothing_new_here	p__Dormibacterota	c__Dormibacteria	o__UBA8260	f__UBA8260	g__Palsa-851	s__Palsa-851 sp003135895
1462_7	GCA_003136295	public genome	1	1	0	0	nothing_new_here	p__Dormibacterota	c__Dormibacteria	o__UBA8260	f__UBA8260	g__Palsa-851	s__Palsa-851 sp003136295
583_0	GCA_003141235	public genome	1	1	0	0	nothing_new_here	p__Chloroflexota	c__Dehalococcoidia	o__Dehalococcoidales	f__RBG-16-60-22	g__Fen-1077	s__Fen-1077 sp003141235
1378_4	GCA_003141245	public genome	1	1	0	0	nothing_new_here	p__Chloroflexota	c__Ellin6529	o__CSP1-4	f__CSP1-4	g__Fen-1039	s__Fen-1039 sp003141245
1373_1	GCA_003141455	public genome	1	1	0	0	nothing_new_here	p__Chloroflexota	c__Ellin6529	o__CSP1-4	f__CSP1-4	g__Fen-1039	s__Fen-1039 sp003141455
1900_0	GCA_003141675	public genome	1	1	0	0	nothing_new_here	p__Chloroflexota	c__Anaerolineae	o__Anaerolineales	f__RBG-16-64-43	g__FEN-1073	s__FEN-1073 sp003141675
1447_5	GCA_003141695	public genome	1	1	0	0	nothing_new_here	p__Dormibacterota	c__Dormibacteria	o__UBA8260	f__UBA8260	g__UBA8260	s__UBA8260 sp003141695
2216_1	GCA_003141915	public genome	2	2	0	0	nothing_new_here	p__Chloroflexota	c__Anaerolineae	o__Anaerolineales	f__EnvOPS12	g__Fen-1038	s__Fen-1038 sp003141915
1378_2	GCA_003141955	public genome	1	1	0	0	nothing_new_here	p__Chloroflexota	c__Ellin6529	o__CSP1-4	f__CSP1-4	g__Fen-1039	s__Fen-1039 sp003141955
1447_2	GCA_003142035	public genome	1	1	0	0	nothing_new_here	p__Dormibacterota	c__Dormibacteria	o__UBA8260	f__UBA8260	g__UBA8260	s__UBA8260 sp003142035
489_2	GCA_003142375	public genome	1	1	0	0	nothing_new_here	p__Chloroflexota	c__Dehalococcoidia	o__GIF9	f__UBA5629	g__UBA1162	s__UBA1162 sp003142375
1424_2	GCA_003151665	public genome	1	1	0	0	nothing_new_here	p__Dormibacterota	c__Dormibacteria	o__Dormibacterales	f__Dormibacteraceae	g__Palsa-872	s__Palsa-872 sp003151665
1425_1	GCA_003151935	public genome	1	1	0	0	nothing_new_here	p__Dormibacterota	c__Dormibacteria	o__Dormibacterales	f__Dormibacteraceae	g__Palsa-870	s__Palsa-870 sp003151935
1401_1	GCA_003152165	public genome	1	1	0	0	nothing_new_here	p__Chloroflexota	c__Ellin6529	o__CSP1-4	f__CSP1-4	g__Palsa-1033	s__Palsa-1033 sp003152165
1457_1	GCA_003152535	public genome	2	2	0	0	nothing_new_here	p__Dormibacterota	c__Dormibacteria	o__UBA8260	f__Bog-877	g__Bog-877	s__Bog-877 sp003135035
1378_6	GCA_003152995	public genome	1	1	0	0	nothing_new_here	p__Chloroflexota	c__Ellin6529	o__CSP1-4	f__CSP1-4	g__Fen-1039	s__Fen-1039 sp003152995
491_2	GCA_003153075	public genome	1	1	0	0	nothing_new_here	p__Chloroflexota	c__Dehalococcoidia	o__Dehalococcoidales	f__Fen-1064	g__Fen-1064	s__Fen-1064 sp003153075
1447_6	GCA_003153215	public genome	1	1	0	0	nothing_new_here	p__Dormibacterota	c__Dormibacteria	o__UBA8260	f__UBA8260	g__UBA8260	s__UBA8260 sp003153215
1462_5	GCA_003153505	public genome	2	2	0	0	nothing_new_here	p__Dormibacterota	c__Dormibacteria	o__UBA8260	f__UBA8260	g__Palsa-851	s__Palsa-851 sp003153505
1379_0	GCA_003153755	public genome	1	1	0	0	nothing_new_here	p__Chloroflexota	c__Ellin6529	o__CSP1-4	f__CSP1-4	g__Fen-1039	s__Fen-1039 sp003153755
492_3	GCA_003153955	public genome	1	1	0	0	nothing_new_here	p__Chloroflexota	c__Dehalococcoidia	o__Dehalococcoidales	f__Fen-1064	g__Fen-1064	s__Fen-1064 sp003153955
2075_0	GCA_003154115	public genome	1	1	0	0	nothing_new_here	p__Chloroflexota	c__Anaerolineae	o__Thermoflexales	f__Fen-1058	g__Fen-1058	s__Fen-1058 sp003154115
1376_4	GCA_003156975	public genome	1	1	0	0	nothing_new_here	p__Chloroflexota	c__Ellin6529	o__CSP1-4	f__CSP1-4	g__Fen-1039	s__Fen-1039 sp003156975
1378_1	GCA_003157175	public genome	2	2	0	0	nothing_new_here	p__Chloroflexota	c__Ellin6529	o__CSP1-4	f__CSP1-4	g__Fen-1039	s__Fen-1039 sp003157175
1378_8	GCA_003157875	public genome	1	1	0	0	nothing_new_here	p__Chloroflexota	c__Ellin6529	o__CSP1-4	f__CSP1-4	g__Fen-1039	s__Fen-1039 sp003157875
1447_1	GCA_003158055	public genome	4	4	0	0	nothing_new_here	p__Dormibacterota	c__Dormibacteria	o__UBA8260	f__UBA8260	g__UBA8260	s__UBA8260 sp003134115
364_0	GCA_003158355	public genome	1	1	0	0	nothing_new_here	p__Chloroflexota	c__Anaerolineae	o__Anaerolineales	f__Anaerolineaceae	g__UBA6107	s__UBA6107 sp003158355
1377_0	GCA_003158495	public genome	1	1	0	0	nothing_new_here	p__Chloroflexota	c__Ellin6529	o__CSP1-4	f__CSP1-4	g__Fen-1039	s__Fen-1039 sp003158495
1373_2	GCA_003158575	public genome	1	1	0	0	nothing_new_here	p__Chloroflexota	c__Ellin6529	o__CSP1-4	f__CSP1-4	g__Fen-1039	s__Fen-1039 sp003158295
1378_7	GCA_003158675	public genome	1	1	0	0	nothing_new_here	p__Chloroflexota	c__Ellin6529	o__CSP1-4	f__CSP1-4	g__Fen-1039	s__Fen-1039 sp003158675
1374_1	GCA_003158875	public genome	1	1	0	0	nothing_new_here	p__Chloroflexota	c__Ellin6529	o__CSP1-4	f__CSP1-4	g__Fen-1039	s__Fen-1039 sp003158875
2217_0	GCA_003158885	public genome	1	1	0	0	nothing_new_here	p__Chloroflexota	c__Anaerolineae	o__Anaerolineales	f__EnvOPS12	g__Fen-1038	s__Fen-1038 sp003158885
491_1	GCA_003161995	public genome	2	2	0	0	nothing_new_here	p__Chloroflexota	c__Dehalococcoidia	o__Dehalococcoidales	f__Fen-1064	g__Fen-1064	s__Fen-1064 sp003162335
1462_2	GCA_003162415	public genome	1	1	0	0	nothing_new_here	p__Dormibacterota	c__Dormibacteria	o__UBA8260	f__UBA8260	g__Palsa-851	s__Palsa-851 sp003162415
1376_3	GCA_003162565	public genome	1	1	0	0	nothing_new_here	p__Chloroflexota	c__Ellin6529	o__CSP1-4	f__CSP1-4	g__Fen-1039	s__Fen-1039 sp003165675
1457_2	GCA_003164475	public genome	1	1	0	0	nothing_new_here	p__Dormibacterota	c__Dormibacteria	o__UBA8260	f__Bog-877	g__Bog-877	s__Bog-877 sp003164475
1401_3	GCA_003169655	public genome	1	1	0	0	nothing_new_here	p__Chloroflexota	c__Ellin6529	o__CSP1-4	f__CSP1-4	g__Palsa-1033	s__Palsa-1033 sp003169655
1367_0	GCA_003169735	public genome	1	1	0	0	nothing_new_here	p__Chloroflexota	c__Ellin6529	o__CSP1-4	f__CSP1-4	g__Palsa-1032	s__Palsa-1032 sp003169735
1425_2	GCA_003169845	public genome	1	1	0	0	nothing_new_here	p__Dormibacterota	c__Dormibacteria	o__Dormibacterales	f__Dormibacteraceae	g__Palsa-870	s__Palsa-870 sp003169845
1375_2	GCA_003170855	public genome	1	1	0	0	nothing_new_here	p__Chloroflexota	c__Ellin6529	o__CSP1-4	f__CSP1-4	g__Fen-1039	s__
1447_4	GCA_003170875	public genome	2	2	0	0	nothing_new_here	p__Dormibacterota	c__Dormibacteria	o__UBA8260	f__UBA8260	g__UBA8260	s__UBA8260 sp003170875
1374_2	GCA_003171035	public genome	1	1	0	0	nothing_new_here	p__Chloroflexota	c__Ellin6529	o__CSP1-4	f__CSP1-4	g__Fen-1039	s__Fen-1039 sp003171035
1378_3	GCA_003171065	public genome	1	1	0	0	nothing_new_here	p__Chloroflexota	c__Ellin6529	o__CSP1-4	f__CSP1-4	g__Fen-1039	s__Fen-1039 sp003171065
1376_1	GCA_003171255	public genome	1	1	0	0	nothing_new_here	p__Chloroflexota	c__Ellin6529	o__CSP1-4	f__CSP1-4	g__Fen-1039	s__Fen-1039 sp003171255
1376_2	GCA_003171455	public genome	1	1	0	0	nothing_new_here	p__Chloroflexota	c__Ellin6529	o__CSP1-4	f__CSP1-4	g__Fen-1039	s__Fen-1039 sp003142755
2038_3	GCA_003205875	public genome	1	1	0	0	nothing_new_here	p__Chloroflexota	c__Chloroflexia	o__Chloroflexales	f__Herpetosiphonaceae	g__Herpetosiphon	s__Herpetosiphon llansteffanensis
808_5	GCA_003228095	public genome	1	1	0	0	nothing_new_here	p__Chloroflexota	c__Dehalococcoidia	o__SAR202	f__UBA2962	g__UBA2962	s__UBA2962 sp003228095
244_0	GCA_003228115	public genome	1	1	0	0	nothing_new_here	p__Chloroflexota	c__Dehalococcoidia	o__SAR202-VII-2	f__SAR202-VII-2	g__SAR202-VII-2	s__SAR202-VII-2 sp003228115
2535_0	GCA_003228125	public genome	1	1	0	0	nothing_new_here	p__Chloroflexota	c__Dehalococcoidia	o__UBA2979	f__UBA2979	g__GCA-002718395	s__GCA-002718395 sp003228125
1237_0	GCA_003228175	public genome	1	1	0	0	nothing_new_here	p__Chloroflexota	c__Dehalococcoidia	o__Bin125	f__Bin125	g__TK10-74A	s__TK10-74A sp003228175
826_0	GCA_003228195	public genome	1	1	0	0	nothing_new_here	p__Chloroflexota	c__Dehalococcoidia	o__UBA6952	f__QGNO01	g__QGNO01	s__QGNO01 sp003228195
1230_0	GCA_003228685	public genome	1	1	0	0	nothing_new_here	p__Chloroflexota	c__Dehalococcoidia	o__DSTF01	f__RBG-16-68-14	g__SZUA-185	s__SZUA-185 sp003228685
208_0	GCA_003229625	public genome	1	1	0	0	nothing_new_here	p__Chloroflexota	c__Anaerolineae	o__Anaerolineales	f__E44-bin32	g__E44-bin32	s__
915_0	GCA_003229915	public genome	1	1	0	0	nothing_new_here	p__Chloroflexota	c__Dehalococcoidia	o__SZUA-161	f__SZUA-161	g__SZUA-161	s__SZUA-161 sp003229915
602_3	GCA_003235095	public genome	1	1	0	0	nothing_new_here	p__Chloroflexota	c__Dehalococcoidia	o__Dehalococcoidales	f__UBA2162	g__MGML01	s__
2318_1	GCA_003236065	public genome	2	2	0	0	nothing_new_here	p__Chloroflexota	c__Anaerolineae	o__Promineofilales	f__Promineofilaceae	g__	s__
800_0	GCA_003243865	public genome	1	1	0	0	nothing_new_here	p__Chloroflexota	c__Chloroflexia	o__54-19	f__QHBQ01	g__QHBQ01	s__QHBQ01 sp003243865
1343_0	GCA_003243965	public genome	1	1	0	0	nothing_new_here	p__Chloroflexota	c__Ellin6529	o__QHBO01	f__QHBO01	g__QHBO01	s__QHBO01 sp003243965
1477_0	GCA_003244175	public genome	1	1	0	0	nothing_new_here	p__Chloroflexota	c__UBA5177	o__UBA5177	f__UBA5177	g__QHBP01	s__QHBP01 sp003244175
1418_1	GCA_003244185	public genome	1	1	0	0	nothing_new_here	p__Dormibacterota	c__Dormibacteria	o__Dormibacterales	f__Dormibacteraceae	g__Dormibacter	s__Dormibacter sp003244185
1409_1	GCA_003247655	public genome	1	1	0	0	nothing_new_here	p__Chloroflexota	c__Ellin6529	o__CSP1-4	f__CSP1-4	g__UBA5189	s__UBA5189 sp003250155
2031_0	GCA_003250455	public genome	1	1	0	0	nothing_new_here	p__Chloroflexota	c__Anaerolineae	o__Anaerolineales	f__UBA11579	g__UBA11579	s__UBA11579 sp003250455
194_0	GCA_003251255	public genome	1	1	0	0	nothing_new_here	p__Chloroflexota	c__Anaerolineae	o__Anaerolineales	f__Anaerolineaceae	g__UBA6170	s__
245_0	GCA_003251805	public genome	1	1	0	0	nothing_new_here	p__Chloroflexota	c__Anaerolineae	o__Promineofilales	f__Promineofilaceae	g__GCA-2699125	s__
195_0	GCA_003251835	public genome	1	1	0	0	nothing_new_here	p__Chloroflexota	c__Anaerolineae	o__Anaerolineales	f__Anaerolineaceae	g__UBA6170	s__
18_3	GCA_003268475	public genome	1	1	0	0	nothing_new_here	p__Chloroflexota	c__Ktedonobacteria	o__Ktedonobacterales	f__Ktedonobacteraceae	g__Thermogemmatispora	s__Thermogemmatispora tikiterensis
2008_0	GCA_003353825	public genome	1	1	0	0	nothing_new_here	p__Chloroflexota	c__Anaerolineae	o__Caldilineales	f__J102	g__	s__
283_1	GCA_003445515	public genome	1	1	0	0	nothing_new_here	p__Chloroflexota	c__Anaerolineae	o__Anaerolineales	f__Anaerolineaceae	g__Brevefilum	s__Brevefilum sp001508595
310_6	GCA_003445715	public genome	1	1	0	0	nothing_new_here	p__Chloroflexota	c__Anaerolineae	o__Anaerolineales	f__Anaerolineaceae	g__49-20	s__49-20 sp003445715
2261_2	GCA_003446435	public genome	1	1	0	0	nothing_new_here	p__Chloroflexota	c__Anaerolineae	o__Anaerolineales	f__EnvOPS12	g__UBA8950	s__
502_0	GCA_003446605	public genome	1	1	0	0	nothing_new_here	p__Chloroflexota	c__Anaerolineae	o__Anaerolineales	f__Anaerolineaceae	g__UBA4781	s__UBA4781 sp003446605
1423_4	GCA_003446775	public genome	1	1	0	0	nothing_new_here	p__Dormibacterota	c__Dormibacteria	o__Dormibacterales	f__Dormibacteraceae	g__UBA10449	s__UBA10449 sp003446775
210_1	GCA_003449775	public genome	3	3	0	0	nothing_new_here	p__Chloroflexota	c__Anaerolineae	o__Anaerolineales	f__UBA11657	g__UBA11657	s__UBA11657 sp002296125
942_1	GCA_003450255	public genome	5	5	0	0	nothing_new_here	p__Chloroflexota	c__Dehalococcoidia	o__UBA3495	f__UBA3495	g__UBA11650	s__
1815_3	GCA_003451595	public genome	1	1	0	0	nothing_new_here	p__Chloroflexota	c__Anaerolineae	o__Caldilineales	f__Caldilineaceae	g__Caldilinea	s__Caldilinea sp003451595
1746_4	GCA_003453555	public genome	2	1	1	0	old+new_onlyMAGsSRA	p__Chloroflexota	c__Anaerolineae	o__UBA7937	f__UBA7937	g__UBA7937	s__UBA7937 sp003453555
361_2	GCA_003453955	public genome	1	1	0	0	nothing_new_here	p__Chloroflexota	c__Anaerolineae	o__Anaerolineales	f__Anaerolineaceae	g__Bellilinea	s__Bellilinea sp001796355
80_7	GCA_003476885	public genome	1	1	0	0	nothing_new_here	p__Chloroflexota	c__Ellin6529	o__CSP1-4	f__UBA10416	g__UBA10416	s__UBA10416 sp003476885
2159_0	GCA_003484265	public genome	1	1	0	0	nothing_new_here	p__Chloroflexota	c__Anaerolineae	o__Anaerolineales	f__EnvOPS12	g__UBA12294	s__UBA12294 sp003484265
471_2	GCA_003484395	public genome	1	1	0	0	nothing_new_here	p__Chloroflexota	c__Dehalococcoidia	o__GIF9	f__UBA5629	g__UBA5629	s__UBA5629 sp003484395
927_1	GCA_003485725	public genome	1	1	0	0	nothing_new_here	p__Chloroflexota	c__Dehalococcoidia	o__SZUA-161	f__SpSt-899	g__	s__
207_0	GCA_003486225	public genome	1	1	0	0	nothing_new_here	p__Chloroflexota	c__Anaerolineae	o__Anaerolineales	f__UBA11579	g__UBA11579	s__UBA11579 sp003486225
407_1	GCA_003513015	public genome	2	2	0	0	nothing_new_here	p__Chloroflexota	c__Anaerolineae	o__Anaerolineales	f__UBA11858	g__UBA11858	s__UBA11858 sp003513015
1447_7	GCA_003514365	public genome	1	1	0	0	nothing_new_here	p__Dormibacterota	c__Dormibacteria	o__UBA8260	f__UBA8260	g__UBA8260	s__UBA8260 sp003491925
2003_0	GCA_003520455	public genome	1	1	0	0	nothing_new_here	p__Chloroflexota	c__Anaerolineae	o__Ardenticatenales	f__Ardenticatenaceae	g__	s__
2531_1	GCA_003523055	public genome	2	2	0	0	nothing_new_here	p__Chloroflexota	c__Dehalococcoidia	o__UBA3495	f__UBA2588	g__UBA2588	s__UBA2588 sp003523055
356_3	GCA_003524305	public genome	1	1	0	0	nothing_new_here	p__Chloroflexota	c__Anaerolineae	o__Anaerolineales	f__Anaerolineaceae	g__UBA6107	s__UBA6107 sp003524305
2152_5	GCA_003524705	public genome	2	2	0	0	nothing_new_here	p__Chloroflexota	c__Anaerolineae	o__Anaerolineales	f__EnvOPS12	g__OLB14	s__OLB14 sp003524705
1602_0	GCA_003526995	public genome	1	1	0	0	nothing_new_here	p__Chloroflexota	c__Ktedonobacteria	o__Ktedonobacterales	f__Ktedonobacteraceae	g__DTNP01	s__
296_0	GCA_003532515	public genome	1	1	0	0	nothing_new_here	p__Chloroflexota	c__Anaerolineae	o__Anaerolineales	f__Anaerolineaceae	g__T78	s__T78 sp003532515
265_1	GCA_003542325	public genome	1	1	0	0	nothing_new_here	p__Chloroflexota	c__Anaerolineae	o__Anaerolineales	f__Anaerolineaceae	g__Brevefilum	s__Brevefilum sp003542325
392_0	GCA_003551205	public genome	1	1	0	0	nothing_new_here	p__Chloroflexota	c__Dehalococcoidia	o__GIF9	f__AB-539-J10	g__SKVJ01	s__
911_0	GCA_003551705	public genome	1	1	0	0	nothing_new_here	p__Chloroflexota	c__Dehalococcoidia	o__UBA2777	f__RBG-13-53-26	g__PUNJ01	s__PUNJ01 sp003551705
87_1	GCA_003552785	public genome	3	3	0	0	nothing_new_here	p__Chloroflexota	c__Dehalococcoidia	o__Dehalococcoidales	f__CSSed11-197	g__CSSed11-197	s__CSSed11-197 sp003552785
1500_1	GCA_003557465	public genome	3	3	0	0	nothing_new_here	p__Chloroflexota	c__Chloroflexia	o__Thermomicrobiales	f__Thermomicrobiaceae	g__SLMJ01	s__SLMJ01 sp007124395
791_2	GCA_003562275	public genome	1	1	0	0	nothing_new_here	p__Chloroflexota	c__Anaerolineae	o__UBA1429	f__UBA1429	g__	s__
1164_1	GCA_003562365	public genome	2	2	0	0	nothing_new_here	p__Chloroflexota	c__Anaerolineae	o__B4-G1	f__SLSP01	g__PWVB01	s__PWVB01 sp003562365
1850_1	GCA_003562415	public genome	3	3	0	0	nothing_new_here	p__Chloroflexota	c__Anaerolineae	o__B4-G1	f__SLSP01	g__SLSP01	s__SLSP01 sp007130345
395_0	GCA_003562475	public genome	1	1	0	0	nothing_new_here	p__Chloroflexota	c__Dehalococcoidia	o__GIF9	f__AB-539-J10	g__SKVJ01	s__SKVJ01 sp003562475
391_1	GCA_003562555	public genome	2	2	0	0	nothing_new_here	p__Chloroflexota	c__Dehalococcoidia	o__GIF9	f__AB-539-J10	g__SKVJ01	s__SKVJ01 sp003562555
393_1	GCA_003563175	public genome	2	2	0	0	nothing_new_here	p__Chloroflexota	c__Dehalococcoidia	o__GIF9	f__AB-539-J10	g__SKVJ01	s__SKVJ01 sp007129495
673_2	GCA_003563775	public genome	1	1	0	0	nothing_new_here	p__Chloroflexota	c__Dehalococcoidia	o__GIF9	f__AB-539-J10	g__E29-bin54	s__
87_2	GCA_003563865	public genome	1	1	0	0	nothing_new_here	p__Chloroflexota	c__Dehalococcoidia	o__Dehalococcoidales	f__CSSed11-197	g__CSSed11-197	s__CSSed11-197 sp003563865
848_0	GCA_003563925	public genome	1	1	0	0	nothing_new_here	p__Chloroflexota	c__Anaerolineae	o__B4-G1	f__B4-G1	g__SKLM01	s__
675_0	GCA_003564015	public genome	1	1	0	0	nothing_new_here	p__Chloroflexota	c__Dehalococcoidia	o__GIF9	f__AB-539-J10	g__E29-bin54	s__E29-bin54 sp003567655
845_3	GCA_003566235	public genome	1	1	0	0	nothing_new_here	p__Chloroflexota	c__Anaerolineae	o__B4-G1	f__B4-G1	g__SKLM01	s__
394_1	GCA_003567335	public genome	3	3	0	0	nothing_new_here	p__Chloroflexota	c__Dehalococcoidia	o__GIF9	f__AB-539-J10	g__SKVJ01	s__SKVJ01 sp003552125
281_0	GCA_003567435	public genome	1	1	0	0	nothing_new_here	p__Chloroflexota	c__Anaerolineae	o__Anaerolineales	f__Anaerolineaceae	g__Brevefilum	s__Brevefilum sp003563055
674_1	GCA_003567995	public genome	2	2	0	0	nothing_new_here	p__Chloroflexota	c__Dehalococcoidia	o__GIF9	f__AB-539-J10	g__E29-bin54	s__E29-bin54 sp003556385
1887_0	GCA_003569045	public genome	1	1	0	0	nothing_new_here	p__Chloroflexota	c__Anaerolineae	o__SBR1031	f__UBA2029	g__MO-CFX2	s__MO-CFX2 sp003569045
2081_3	GCA_003569365	public genome	1	1	0	0	nothing_new_here	p__Chloroflexota	c__Anaerolineae	o__Anaerolineales	f__UBA11657	g__BD1	s__BD1 sp003569365
1189_0	GCA_003577005	public genome	1	1	0	0	nothing_new_here	p__Chloroflexota	c__Anaerolineae	o__Caldilineales	f__Caldilineaceae	g__CFX5	s__CFX5 sp003577005
1154_1	GCA_003577085	public genome	3	2	1	0	old+new_onlyMAGsSRA	p__Chloroflexota	c__Anaerolineae	o__UBA4142	f__SHND01	g__SHND01	s__
1474_0	GCA_003577355	public genome	1	1	0	0	nothing_new_here	p__Chloroflexota	c__Chloroflexia	o__Thermomicrobiales	f__CFX8	g__CFX8	s__CFX8 sp003577355
2336_2	GCA_003577365	public genome	1	1	0	0	nothing_new_here	p__Chloroflexota	c__Anaerolineae	o__Caldilineales	f__Caldilineaceae	g__Litorilinea	s__
2164_5	GCA_003577395	public genome	1	1	0	0	nothing_new_here	p__Chloroflexota	c__Anaerolineae	o__Anaerolineales	f__EnvOPS12	g__UBA12294	s__UBA12294 sp003577395
1977_1	GCA_003577455	public genome	1	1	0	0	nothing_new_here	p__Chloroflexota	c__Anaerolineae	o__Promineofilales	f__Promineofilaceae	g__Promineofilum	s__
2362_2	GCA_003597995	public genome	1	1	0	0	nothing_new_here	p__Chloroflexota	c__Dehalococcoidia	o__Dehalococcoidales	f__UBA1222	g__SURF-27	s__SURF-27 sp003597995
2172_1	GCA_003598975	public genome	2	2	0	0	nothing_new_here	p__Chloroflexota	c__Anaerolineae	o__Anaerolineales	f__EnvOPS12	g__UBA7227	s__UBA7227 sp003598975
1289_1	GCA_003599735	public genome	1	1	0	0	nothing_new_here	p__Chloroflexota	c__Dehalococcoidia	o__UBA2979	f__UBA2979	g__SURF-43	s__SURF-43 sp003599735
522_0	GCA_003599805	public genome	1	1	0	0	nothing_new_here	p__Chloroflexota	c__Anaerolineae	o__Anaerolineales	f__Anaerolineaceae	g__UBA4781	s__
1668_0	GCA_003647955	public genome	1	1	0	0	nothing_new_here	p__Chloroflexota	c__Anaerolineae	o__B4-G1	f__B4-G1	g__	s__
925_0	GCA_003648015	public genome	1	1	0	0	nothing_new_here	p__Chloroflexota	c__Dehalococcoidia	o__SZUA-161	f__SpSt-899	g__	s__
1251_2	GCA_003648125	public genome	1	1	0	0	nothing_new_here	p__Chloroflexota	c__Anaerolineae	o__B4-G1	f__B4-G1	g__B4-G1	s__B4-G1 sp003648125
217_0	GCA_003648185	public genome	1	1	0	0	nothing_new_here	p__Chloroflexota	c__Anaerolineae	o__Anaerolineales	f__EnvOPS12	g__NIOZ-UU36	s__
218_1	GCA_003648195	public genome	3	3	0	0	nothing_new_here	p__Chloroflexota	c__Anaerolineae	o__Anaerolineales	f__UBA11858	g__B10-G9	s__B10-G9 sp003648195
1642_1	GCA_003650185	public genome	2	2	0	0	nothing_new_here	p__Chloroflexota	c__Dehalococcoidia	o__UBA2777	f__RBG-13-53-26	g__B9-G15	s__B9-G15 sp003650185
82_5	GCA_003670455	public genome	5	5	0	0	nothing_new_here	p__Chloroflexota	c__Ellin6529	o__CSP1-4	f__UBA10416	g__UBA10416	s__UBA10416 sp003670455
80_4	GCA_003670475	public genome	3	3	0	0	nothing_new_here	p__Chloroflexota	c__Ellin6529	o__CSP1-4	f__UBA10416	g__UBA10416	s__UBA10416 sp003670475
2081_1	GCA_003670495	public genome	3	3	0	0	nothing_new_here	p__Chloroflexota	c__Anaerolineae	o__Anaerolineales	f__UBA11657	g__BD1	s__BD1 sp003670425
1763_2	GCA_003670635	public genome	1	1	0	0	nothing_new_here	p__Chloroflexota	c__Chloroflexia	o__Chloroflexales	f__Roseiflexaceae	g__UBA965	s__UBA965 sp003670675
1286_0	GCA_003670735	public genome	1	1	0	0	nothing_new_here	p__Chloroflexota	c__Dehalococcoidia	o__UBA2979	f__UBA2979	g__RH-chloro-G1	s__RH-chloro-G1 sp003670735
83_0	GCA_003670745	public genome	1	1	0	0	nothing_new_here	p__Chloroflexota	c__Ellin6529	o__CSP1-4	f__UBA10416	g__UBA10416	s__UBA10416 sp003670745
1775_1	GCA_003694235	public genome	2	1	1	0	old+new_onlyMAGsSRA	p__Chloroflexota	c__Anaerolineae	o__Anaerolineales	f__UBA11858	g__J130	s__J130 sp003694235
1139_1	GCA_003694395	public genome	2	1	1	0	old+new_onlyMAGsSRA	p__Chloroflexota	c__Anaerolineae	o__UCB3	f__	g__	s__
1138_1	GCA_003694905	public genome	2	1	1	0	old+new_onlyMAGsSRA	p__Chloroflexota	c__Anaerolineae	o__Caldilineales	f__J102	g__J102	s__J102 sp003694905
2143_1	GCA_003694975	public genome	2	1	1	0	old+new_onlyMAGsSRA	p__Chloroflexota	c__Anaerolineae	o__Anaerolineales	f__EnvOPS12	g__J097	s__J097 sp003694975
2053_1	GCA_003695455	public genome	2	1	1	0	old+new_onlyMAGsSRA	p__Chloroflexota	c__Anaerolineae	o__4572-78	f__J111	g__J095	s__J095 sp003695455
1999_1	GCA_003695545	public genome	2	1	1	0	old+new_onlyMAGsSRA	p__Chloroflexota	c__Anaerolineae	o__B4-G1	f__	g__	s__
108_0	GCA_003818195	public genome	1	1	0	0	nothing_new_here	p__Chloroflexota	c__Ellin6529	o__QHBO01	f__QHBO01	g__	s__
2110_0	GCA_003818555	public genome	1	1	0	0	nothing_new_here	p__Chloroflexota	c__Anaerolineae	o__Anaerolineales	f__EnvOPS12	g__	s__
1871_0	GCA_003818635	public genome	1	1	0	0	nothing_new_here	p__Chloroflexota	c__Anaerolineae	o__SBR1031	f__UBA2029	g__UBA2029	s__
1899_0	GCA_003819735	public genome	1	1	0	0	nothing_new_here	p__Chloroflexota	c__Anaerolineae	o__Anaerolineales	f__UBA4823	g__CAIQJJ01	s__
1716_3	GCA_003819865	public genome	1	1	0	0	nothing_new_here	p__Chloroflexota	c__Anaerolineae	o__JAAYZQ01	f__JAAYZQ01	g__JAAYZQ01	s__
187_0	GCA_003820065	public genome	1	1	0	0	nothing_new_here	p__Chloroflexota	c__Anaerolineae	o__Anaerolineales	f__UBA4823	g__CAIQJJ01	s__
2157_1	GCA_003820075	public genome	1	1	0	0	nothing_new_here	p__Chloroflexota	c__Anaerolineae	o__Anaerolineales	f__EnvOPS12	g__UBA12294	s__
2157_2	GCA_003820175	public genome	1	1	0	0	nothing_new_here	p__Chloroflexota	c__Anaerolineae	o__Anaerolineales	f__EnvOPS12	g__UBA12294	s__
1560_2	GCA_003934145	public genome	1	1	0	0	nothing_new_here	p__Chloroflexota	c__Chloroflexia	o__Chloroflexales	f__Chloroflexaceae	g__Viridilinea	s__
557_2	GCA_003966975	public genome	1	1	0	0	nothing_new_here	p__Chloroflexota	c__Anaerolineae	o__Anaerolineales	f__Anaerolineaceae	g__Pelolinea	s__Pelolinea submarina
29_1	GCA_003967515	public genome	1	1	0	0	nothing_new_here	p__Chloroflexota	c__Ktedonobacteria	o__Ktedonobacterales	f__Ktedonobacteraceae	g__Dictyobacter	s__Dictyobacter aurantiacus
1575_2	GCA_004138135	public genome	1	1	0	0	nothing_new_here	p__Chloroflexota	c__Chloroflexia	o__Chloroflexales	f__Chloroflexaceae	g__Oscillochloris	s__Oscillochloris fontis
1574_4	GCA_004138165	public genome	1	1	0	0	nothing_new_here	p__Chloroflexota	c__Chloroflexia	o__Chloroflexales	f__Chloroflexaceae	g__Chloroploca	s__Chloroploca sp004138165
1592_2	GCA_004138175	public genome	1	1	0	0	nothing_new_here	p__Chloroflexota	c__Chloroflexia	o__Chloroflexales	f__Chloroflexaceae	g__Oscillochloris	s__Oscillochloris sp004138175
49_0	GCA_004208415	public genome	1	1	0	0	nothing_new_here	p__Chloroflexota	c__Ktedonobacteria	o__Ktedonobacterales	f__Ktedonobacteraceae	g__Ktedonosporobacter	s__Ktedonosporobacter rubrisoli
2546_2	GCA_004213445	public genome	1	1	0	0	nothing_new_here	p__Chloroflexota	c__Dehalococcoidia	o__UBA1151	f__TMED-70	g__TMED-70	s__TMED-70 sp002171675
2547_1	GCA_004214105	public genome	2	2	0	0	nothing_new_here	p__Chloroflexota	c__Dehalococcoidia	o__UBA1151	f__TMED-70	g__TMED-70	s__TMED-70 sp002699165
1155_2	GCA_004295045	public genome	1	1	0	0	nothing_new_here	p__Chloroflexota	c__Anaerolineae	o__UBA4142	f__SHND01	g__SHND01	s__SHND01 sp004295045
1290_0	GCA_004296805	public genome	1	1	0	0	nothing_new_here	p__Chloroflexota	c__Dehalococcoidia	o__UBA2979	f__UBA2979	g__SURF-43	s__SURF-43 sp004296805
1289_3	GCA_004297315	public genome	1	1	0	0	nothing_new_here	p__Chloroflexota	c__Dehalococcoidia	o__UBA2979	f__UBA2979	g__SURF-43	s__SURF-43 sp004297315
1405_2	GCA_004297395	public genome	1	1	0	0	nothing_new_here	p__Chloroflexota	c__Ellin6529	o__CSP1-4	f__CSP1-4	g__UBA5189	s__UBA5189 sp004297395
1689_0	GCA_004297445	public genome	1	1	0	0	nothing_new_here	p__Chloroflexota	c__Anaerolineae	o__Anaerolineales	f__UBA11579	g__SCUK01	s__SCUK01 sp004297445
1265_1	GCA_004297475	public genome	1	1	0	0	nothing_new_here	p__Chloroflexota	c__Dehalococcoidia	o__DSTF01	f__RBG-16-68-14	g__	s__
744_0	GCA_004297765	public genome	1	1	0	0	nothing_new_here	p__Chloroflexota	c__Dehalococcoidia	o__FW602-bin16	f__FW602-bin16	g__FW602-bin16	s__FW602-bin16 sp004297765
1510_0	GCA_004297775	public genome	1	1	0	0	nothing_new_here	p__Chloroflexota	c__FW602-bin22	o__FW602-bin22	f__FW602-bin22	g__FW602-bin22	s__FW602-bin22 sp004297775
1407_0	GCA_004298915	public genome	1	1	0	0	nothing_new_here	p__Chloroflexota	c__Ellin6529	o__CSP1-4	f__CSP1-4	g__UBA5189	s__UBA5189 sp004298915
1365_0	GCA_004322035	public genome	1	1	0	0	nothing_new_here	p__Chloroflexota	c__Ellin6529	o__CSP1-4	f__CSP1-4	g__	s__
1163_0	GCA_004356475	public genome	1	1	0	0	nothing_new_here	p__Chloroflexota	c__Anaerolineae	o__Anaerolineales	f__E44-bin32	g__	s__
651_10	GCA_004375675	public genome	2	2	0	0	nothing_new_here	p__Chloroflexota	c__Dehalococcoidia	o__Dehalococcoidales	f__E44-bin88	g__E44-bin88	s__E44-bin88 sp004375675
189_0	GCA_004375765	public genome	1	1	0	0	nothing_new_here	p__Chloroflexota	c__Anaerolineae	o__Anaerolineales	f__UBA11579	g__	s__
398_0	GCA_004375865	public genome	1	1	0	0	nothing_new_here	p__Chloroflexota	c__Anaerolineae	o__B4-G1	f__B4-G1	g__	s__
699_0	GCA_004375885	public genome	1	1	0	0	nothing_new_here	p__Chloroflexota	c__Dehalococcoidia	o__GIF9	f__AB-539-J10	g__E29-bin73	s__E29-bin73 sp004375885
924_2	GCA_004376075	public genome	1	1	0	0	nothing_new_here	p__Chloroflexota	c__Dehalococcoidia	o__SZUA-161	f__E44-bin15	g__E44-bin26	s__E44-bin26 sp004376075
639_5	GCA_004376105	public genome	1	1	0	0	nothing_new_here	p__Chloroflexota	c__Dehalococcoidia	o__Dehalococcoidales	f__UBA5760	g__E44-bin46	s__E44-bin46 sp004376105
642_0	GCA_004376435	public genome	1	1	0	0	nothing_new_here	p__Chloroflexota	c__Dehalococcoidia	o__Dehalococcoidales	f__SOJS01	g__SOJS01	s__SOJS01 sp004376435
1242_7	GCA_004376465	public genome	1	1	0	0	nothing_new_here	p__Chloroflexota	c__Anaerolineae	o__Anaerolineales	f__E44-bin32	g__E44-bin32	s__E44-bin32 sp004376465
690_2	GCA_004376495	public genome	1	1	0	0	nothing_new_here	p__Chloroflexota	c__Dehalococcoidia	o__GIF9	f__AB-539-J10	g__	s__
702_1	GCA_004376695	public genome	5	2	2	1	old+new_MAGsSRA+Sample	p__Chloroflexota	c__Dehalococcoidia	o__GIF9	f__AB-539-J10	g__E29-bin54	s__E29-bin54 sp004376695
1242_1	GCA_004376895	public genome	1	1	0	0	nothing_new_here	p__Chloroflexota	c__Anaerolineae	o__Anaerolineales	f__E44-bin32	g__E44-bin32	s__E44-bin32 sp004376895
914_3	GCA_004376985	public genome	1	1	0	0	nothing_new_here	p__Chloroflexota	c__Dehalococcoidia	o__SZUA-161	f__SZUA-161	g__SZUA-161	s__
659_0	GCA_004376995	public genome	1	1	0	0	nothing_new_here	p__Chloroflexota	c__Dehalococcoidia	o__Dehalococcoidales	f__RBG-16-60-22	g__	s__
256_2	GCA_004377125	public genome	1	1	0	0	nothing_new_here	p__Chloroflexota	c__Anaerolineae	o__Anaerolineales	f__E44-bin32	g__	s__
693_8	GCA_004377135	public genome	2	2	0	0	nothing_new_here	p__Chloroflexota	c__Dehalococcoidia	o__GIF9	f__AB-539-J10	g__E44-bin10	s__E44-bin10 sp004377135
1024_1	GCA_004377235	public genome	1	1	0	0	nothing_new_here	p__Chloroflexota	c__Dehalococcoidia	o__SM23-28-2	f__RBG-16-64-32	g__RBG-16-64-32	s__
922_2	GCA_004377275	public genome	4	3	1	0	mostly_old	p__Chloroflexota	c__Dehalococcoidia	o__SZUA-161	f__E44-bin15	g__E29-bin15	s__E29-bin15 sp004377275
1711_4	GCA_004377365	public genome	1	1	0	0	nothing_new_here	p__Chloroflexota	c__Anaerolineae	o__E26-bin7	f__E26-bin7	g__E26-bin7	s__E26-bin7 sp004377365
1387_0	GCA_004525275	public genome	1	1	0	0	nothing_new_here	p__Chloroflexota	c__Ellin6529	o__CSP1-4	f__CSP1-4	g__SPCO01	s__SPCO01 sp004525275
1639_0	GCA_004525435	public genome	1	1	0	0	nothing_new_here	p__Chloroflexota	c__Anaerolineae	o__B4-G1	f__SLSP01	g__	s__
1231_1	GCA_004525995	public genome	2	1	1	0	old+new_onlyMAGsSRA	p__Chloroflexota	c__Anaerolineae	o__Anaerolineales	f__E44-bin32	g__E44-bin32	s__
509_0	GCA_004526065	public genome	1	1	0	0	nothing_new_here	p__Chloroflexota	c__Dehalococcoidia	o__GIF9	f__AB-539-J10	g__SKVJ01	s__
749_1	GCA_005223035	public genome	1	1	0	0	nothing_new_here	p__Chloroflexota	c__Anaerolineae	o__UBA7937	f__B3-Chlor	g__B3-Chlor	s__B3-Chlor sp005223035
33_0	GCA_005402645	public genome	1	1	0	0	nothing_new_here	p__Chloroflexota	c__Ktedonobacteria	o__Ktedonobacterales	f__Ktedonobacteraceae	g__Thermosporothrix	s__Thermosporothrix hazakensis
38_0	GCA_005879655	public genome	1	1	0	0	nothing_new_here	p__Chloroflexota	c__Ktedonobacteria	o__Ktedonobacterales	f__Ktedonobacteraceae	g__CF-154	s__CF-154 sp005879655
62_1	GCA_005879665	public genome	5	3	2	0	old+new_onlyMAGsSRA	p__Chloroflexota	c__Ktedonobacteria	o__Ktedonobacterales	f__Ktedonobacteraceae	g__	s__
1436_11	GCA_005879675	public genome	1	1	0	0	nothing_new_here	p__Dormibacterota	c__Dormibacteria	o__Dormibacterales	f__Dormibacteraceae	g__40CM-4-65-16	s__40CM-4-65-16 sp005879675
1351_0	GCA_005879775	public genome	1	1	0	0	nothing_new_here	p__Chloroflexota	c__Ellin6529	o__QHBO01	f__QHBO01	g__CF-167	s__CF-167 sp005879775
1445_0	GCA_005879785	public genome	1	1	0	0	nothing_new_here	p__Dormibacterota	c__Dormibacteria	o__UBA8260	f__UBA8260	g__CF-165	s__CF-165 sp005879785
1345_1	GCA_005879815	public genome	1	1	0	0	nothing_new_here	p__Chloroflexota	c__Ellin6529	o__QHBO01	f__QHBO01	g__CF-82	s__CF-82 sp005879815
1413_0	GCA_005879885	public genome	1	1	0	0	nothing_new_here	p__Chloroflexota	c__Ellin6529	o__CSP1-4	f__CSP1-4	g__JACDAV01	s__
1423_6	GCA_005879945	public genome	1	1	0	0	nothing_new_here	p__Dormibacterota	c__Dormibacteria	o__Dormibacterales	f__Dormibacteraceae	g__UBA10449	s__UBA10449 sp005879945
1335_1	GCA_005879975	public genome	1	1	0	0	nothing_new_here	p__Chloroflexota	c__Ellin6529	o__P2-11E	f__P2-11E	g__3-1-20CM-2-70-9	s__3-1-20CM-2-70-9 sp005879975
1429_2	GCA_005879985	public genome	1	1	0	0	nothing_new_here	p__Dormibacterota	c__Dormibacteria	o__Dormibacterales	f__Dormibacteraceae	g__CF-118	s__CF-118 sp005879985
1337_7	GCA_005880015	public genome	1	1	0	0	nothing_new_here	p__Chloroflexota	c__Ellin6529	o__P2-11E	f__P2-11E	g__3-1-20CM-2-70-9	s__
1339_1	GCA_005880035	public genome	3	3	0	0	nothing_new_here	p__Chloroflexota	c__Ellin6529	o__P2-11E	f__P2-11E	g__CF-39	s__CF-39 sp005887995
1072_0	GCA_005880055	public genome	1	1	0	0	nothing_new_here	p__Chloroflexota	c__Dehalococcoidia	o__SM23-28-2	f__RBG-16-64-32	g__CF-162	s__CF-162 sp005880055
1073_3	GCA_005880075	public genome	1	1	0	0	nothing_new_here	p__Chloroflexota	c__Dehalococcoidia	o__SM23-28-2	f__RBG-16-64-32	g__CF-163	s__CF-163 sp005880075
1345_2	GCA_005880165	public genome	1	1	0	0	nothing_new_here	p__Chloroflexota	c__Ellin6529	o__QHBO01	f__QHBO01	g__CF-82	s__CF-82 sp005880165
1419_2	GCA_005880175	public genome	1	1	0	0	nothing_new_here	p__Dormibacterota	c__Dormibacteria	o__Dormibacterales	f__Dormibacteraceae	g__CF-161	s__CF-161 sp005880175
60_1	GCA_005880255	public genome	16	15	1	0	mostly_old	p__Chloroflexota	c__Ktedonobacteria	o__Ktedonobacterales	f__Ktedonobacteraceae	g__UBA11361	s__UBA11361 sp005881295
1423_1	GCA_005880315	public genome	2	2	0	0	nothing_new_here	p__Dormibacterota	c__Dormibacteria	o__Dormibacterales	f__Dormibacteraceae	g__UBA10449	s__UBA10449 sp005880315
1435_3	GCA_005880345	public genome	1	1	0	0	nothing_new_here	p__Dormibacterota	c__Dormibacteria	o__Dormibacterales	f__Dormibacteraceae	g__40CM-4-65-16	s__40CM-4-65-16 sp005880345
1441_0	GCA_005880395	public genome	1	1	0	0	nothing_new_here	p__Dormibacterota	c__Dormibacteria	o__CF-121	f__CF-121	g__CF-13	s__CF-13 sp005880395
1429_1	GCA_005880525	public genome	4	4	0	0	nothing_new_here	p__Dormibacterota	c__Dormibacteria	o__Dormibacterales	f__Dormibacteraceae	g__CF-118	s__CF-118 sp005880525
1211_0	GCA_005880535	public genome	1	1	0	0	nothing_new_here	p__Chloroflexota	c__Anaerolineae	o__	f__	g__	s__
1337_3	GCA_005880575	public genome	1	1	0	0	nothing_new_here	p__Chloroflexota	c__Ellin6529	o__P2-11E	f__P2-11E	g__3-1-20CM-2-70-9	s__3-1-20CM-2-70-9 sp005880575
1440_7	GCA_005880605	public genome	2	2	0	0	nothing_new_here	p__Dormibacterota	c__Dormibacteria	o__CF-121	f__CF-121	g__CF-13	s__CF-13 sp005880605
1443_0	GCA_005880615	public genome	1	1	0	0	nothing_new_here	p__Dormibacterota	c__Dormibacteria	o__CF-121	f__CF-121	g__CF-121	s__CF-121 sp005880615
1420_3	GCA_005880695	public genome	1	1	0	0	nothing_new_here	p__Dormibacterota	c__Dormibacteria	o__Dormibacterales	f__Dormibacteraceae	g__VBGR01	s__VBGR01 sp005880695
1428_1	GCA_005880745	public genome	3	3	0	0	nothing_new_here	p__Dormibacterota	c__Dormibacteria	o__Dormibacterales	f__Dormibacteraceae	g__CF-54	s__CF-54 sp005881025
1436_9	GCA_005880755	public genome	1	1	0	0	nothing_new_here	p__Dormibacterota	c__Dormibacteria	o__Dormibacterales	f__Dormibacteraceae	g__40CM-4-65-16	s__40CM-4-65-16 sp005880755
1436_3	GCA_005880795	public genome	2	2	0	0	nothing_new_here	p__Dormibacterota	c__Dormibacteria	o__Dormibacterales	f__Dormibacteraceae	g__40CM-4-65-16	s__40CM-4-65-16 sp005880795
1415_0	GCA_005880805	public genome	1	1	0	0	nothing_new_here	p__Chloroflexota	c__Ellin6529	o__CSP1-4	f__CSP1-4	g__CF-16	s__CF-16 sp005880805
1423_2	GCA_005880855	public genome	1	1	0	0	nothing_new_here	p__Dormibacterota	c__Dormibacteria	o__Dormibacterales	f__Dormibacteraceae	g__UBA10449	s__UBA10449 sp005880855
1440_1	GCA_005880875	public genome	2	2	0	0	nothing_new_here	p__Dormibacterota	c__Dormibacteria	o__CF-121	f__CF-121	g__CF-13	s__CF-13 sp005880875
1420_1	GCA_005880895	public genome	2	2	0	0	nothing_new_here	p__Dormibacterota	c__Dormibacteria	o__Dormibacterales	f__Dormibacteraceae	g__CF-105	s__CF-105 sp005881155
1436_1	GCA_005880915	public genome	1	1	0	0	nothing_new_here	p__Dormibacterota	c__Dormibacteria	o__Dormibacterales	f__Dormibacteraceae	g__40CM-4-65-16	s__40CM-4-65-16 sp005880915
1427_0	GCA_005880945	public genome	1	1	0	0	nothing_new_here	p__Dormibacterota	c__Dormibacteria	o__Dormibacterales	f__Dormibacteraceae	g__Palsa-872	s__Palsa-872 sp005880945
1448_0	GCA_005880985	public genome	1	1	0	0	nothing_new_here	p__Dormibacterota	c__Dormibacteria	o__UBA8260	f__UBA8260	g__CF-134	s__CF-134 sp005880985
1402_0	GCA_005881055	public genome	1	1	0	0	nothing_new_here	p__Chloroflexota	c__Ellin6529	o__CSP1-4	f__CSP1-4	g__C-114	s__C-114 sp005881055
1337_4	GCA_005881085	public genome	1	1	0	0	nothing_new_here	p__Chloroflexota	c__Ellin6529	o__P2-11E	f__P2-11E	g__3-1-20CM-2-70-9	s__3-1-20CM-2-70-9 sp005881085
1440_3	GCA_005881175	public genome	2	2	0	0	nothing_new_here	p__Dormibacterota	c__Dormibacteria	o__CF-121	f__CF-121	g__CF-13	s__CF-13 sp005881175
1436_8	GCA_005881185	public genome	6	6	0	0	nothing_new_here	p__Dormibacterota	c__Dormibacteria	o__Dormibacterales	f__Dormibacteraceae	g__40CM-4-65-16	s__40CM-4-65-16 sp005881335
1440_2	GCA_005881215	public genome	1	1	0	0	nothing_new_here	p__Dormibacterota	c__Dormibacteria	o__CF-121	f__CF-121	g__CF-13	s__CF-13 sp005881215
1440_12	GCA_005881235	public genome	2	2	0	0	nothing_new_here	p__Dormibacterota	c__Dormibacteria	o__CF-121	f__CF-121	g__CF-13	s__CF-13 sp005881235
1337_5	GCA_005881385	public genome	1	1	0	0	nothing_new_here	p__Chloroflexota	c__Ellin6529	o__P2-11E	f__P2-11E	g__3-1-20CM-2-70-9	s__
60_2	GCA_005881415	public genome	1	1	0	0	nothing_new_here	p__Chloroflexota	c__Ktedonobacteria	o__Ktedonobacterales	f__Ktedonobacteraceae	g__UBA11361	s__
1444_0	GCA_005881425	public genome	1	1	0	0	nothing_new_here	p__Dormibacterota	c__Dormibacteria	o__CF-121	f__CF-121	g__CF-120	s__CF-120 sp005881425
1322_0	GCA_005881435	public genome	1	1	0	0	nothing_new_here	p__Chloroflexota	c__Ellin6529	o__P2-11E	f__CF-107	g__CF-107	s__CF-107 sp005881435
1440_4	GCA_005881715	public genome	5	5	0	0	nothing_new_here	p__Dormibacterota	c__Dormibacteria	o__CF-121	f__CF-121	g__CF-13	s__CF-13 sp005881715
1336_3	GCA_005881735	public genome	1	1	0	0	nothing_new_here	p__Chloroflexota	c__Ellin6529	o__P2-11E	f__P2-11E	g__3-1-20CM-2-70-9	s__3-1-20CM-2-70-9 sp005889075
1421_0	GCA_005881825	public genome	1	1	0	0	nothing_new_here	p__Dormibacterota	c__Dormibacteria	o__Dormibacterales	f__Dormibacteraceae	g__CF-28	s__CF-28 sp005881825
1335_2	GCA_005881885	public genome	1	1	0	0	nothing_new_here	p__Chloroflexota	c__Ellin6529	o__P2-11E	f__P2-11E	g__3-1-20CM-2-70-9	s__3-1-20CM-2-70-9 sp005881885
61_1	GCA_005881995	public genome	2	2	0	0	nothing_new_here	p__Chloroflexota	c__Ktedonobacteria	o__Ktedonobacterales	f__Ktedonobacteraceae	g__CF-113	s__CF-113 sp005881995
1440_8	GCA_005882045	public genome	2	2	0	0	nothing_new_here	p__Dormibacterota	c__Dormibacteria	o__CF-121	f__CF-121	g__CF-13	s__CF-13 sp005882045
1345_3	GCA_005882055	public genome	1	1	0	0	nothing_new_here	p__Chloroflexota	c__Ellin6529	o__QHBO01	f__QHBO01	g__CF-82	s__CF-82 sp005882055
1434_1	GCA_005882115	public genome	4	4	0	0	nothing_new_here	p__Dormibacterota	c__Dormibacteria	o__Dormibacterales	f__Dormibacteraceae	g__40CM-4-65-16	s__40CM-4-65-16 sp001917775
1436_6	GCA_005882135	public genome	2	2	0	0	nothing_new_here	p__Dormibacterota	c__Dormibacteria	o__Dormibacterales	f__Dormibacteraceae	g__40CM-4-65-16	s__40CM-4-65-16 sp005882135
1338_2	GCA_005882255	public genome	2	2	0	0	nothing_new_here	p__Chloroflexota	c__Ellin6529	o__P2-11E	f__P2-11E	g__CF-39	s__CF-39 sp005882255
1440_10	GCA_005882525	public genome	2	2	0	0	nothing_new_here	p__Dormibacterota	c__Dormibacteria	o__CF-121	f__CF-121	g__CF-13	s__CF-13 sp005882525
1410_1	GCA_005882635	public genome	1	1	0	0	nothing_new_here	p__Chloroflexota	c__Ellin6529	o__CSP1-4	f__CSP1-4	g__CF-46	s__CF-46 sp005882635
1337_1	GCA_005882765	public genome	2	2	0	0	nothing_new_here	p__Chloroflexota	c__Ellin6529	o__P2-11E	f__P2-11E	g__3-1-20CM-2-70-9	s__3-1-20CM-2-70-9 sp005882765
1442_1	GCA_005882775	public genome	2	2	0	0	nothing_new_here	p__Dormibacterota	c__Dormibacteria	o__CF-121	f__CF-121	g__VBDY01	s__VBDY01 sp005882775
1436_7	GCA_005882825	public genome	2	2	0	0	nothing_new_here	p__Dormibacterota	c__Dormibacteria	o__Dormibacterales	f__Dormibacteraceae	g__40CM-4-65-16	s__40CM-4-65-16 sp005881275
1073_2	GCA_005882985	public genome	2	2	0	0	nothing_new_here	p__Chloroflexota	c__Dehalococcoidia	o__SM23-28-2	f__RBG-16-64-32	g__CF-163	s__CF-163 sp005882985
1214_1	GCA_005883405	public genome	2	2	0	0	nothing_new_here	p__Chloroflexota	c__UBA6077	o__UBA6077	f__CF-72	g__CF-72	s__CF-72 sp005883405
1435_2	GCA_005883575	public genome	1	1	0	0	nothing_new_here	p__Dormibacterota	c__Dormibacteria	o__Dormibacterales	f__Dormibacteraceae	g__40CM-4-65-16	s__40CM-4-65-16 sp005883575
1423_5	GCA_005883585	public genome	1	1	0	0	nothing_new_here	p__Dormibacterota	c__Dormibacteria	o__Dormibacterales	f__Dormibacteraceae	g__UBA10449	s__UBA10449 sp001917895
1371_1	GCA_005883615	public genome	2	1	1	0	old+new_onlyMAGsSRA	p__Chloroflexota	c__Ellin6529	o__CSP1-4	f__CSP1-4	g__CF-16	s__CF-16 sp005883615
1330_1	GCA_005883625	public genome	5	5	0	0	nothing_new_here	p__Chloroflexota	c__Ellin6529	o__P2-11E	f__P2-11E	g__3-1-20CM-2-70-9	s__3-1-20CM-2-70-9 sp001919195
1337_2	GCA_005883775	public genome	3	3	0	0	nothing_new_here	p__Chloroflexota	c__Ellin6529	o__P2-11E	f__P2-11E	g__3-1-20CM-2-70-9	s__3-1-20CM-2-70-9 sp005883775
1436_5	GCA_005887685	public genome	1	1	0	0	nothing_new_here	p__Dormibacterota	c__Dormibacteria	o__Dormibacterales	f__Dormibacteraceae	g__40CM-4-65-16	s__40CM-4-65-16 sp005887685
1436_4	GCA_005887735	public genome	1	1	0	0	nothing_new_here	p__Dormibacterota	c__Dormibacteria	o__Dormibacterales	f__Dormibacteraceae	g__40CM-4-65-16	s__40CM-4-65-16 sp005887735
1437_0	GCA_005888075	public genome	1	1	0	0	nothing_new_here	p__Dormibacterota	c__Dormibacteria	o__Dormibacterales	f__Dormibacteraceae	g__40CM-4-65-16	s__40CM-4-65-16 sp005888075
1436_2	GCA_005889085	public genome	1	1	0	0	nothing_new_here	p__Dormibacterota	c__Dormibacteria	o__Dormibacterales	f__Dormibacteraceae	g__40CM-4-65-16	s__40CM-4-65-16 sp005889085
1436_10	GCA_005889135	public genome	2	2	0	0	nothing_new_here	p__Dormibacterota	c__Dormibacteria	o__Dormibacterales	f__Dormibacteraceae	g__40CM-4-65-16	s__40CM-4-65-16 sp005889135
1440_5	GCA_005889225	public genome	1	1	0	0	nothing_new_here	p__Dormibacterota	c__Dormibacteria	o__CF-121	f__CF-121	g__CF-13	s__CF-13 sp005889225
1336_1	GCA_005889275	public genome	2	2	0	0	nothing_new_here	p__Chloroflexota	c__Ellin6529	o__P2-11E	f__P2-11E	g__3-1-20CM-2-70-9	s__3-1-20CM-2-70-9 sp005889275
1440_13	GCA_005889285	public genome	1	1	0	0	nothing_new_here	p__Dormibacterota	c__Dormibacteria	o__CF-121	f__CF-121	g__CF-13	s__CF-13 sp005889285
1337_6	GCA_005889295	public genome	1	1	0	0	nothing_new_here	p__Chloroflexota	c__Ellin6529	o__P2-11E	f__P2-11E	g__3-1-20CM-2-70-9	s__3-1-20CM-2-70-9 sp005889295
1455_1	GCA_005889335	public genome	2	2	0	0	nothing_new_here	p__Dormibacterota	c__Dormibacteria	o__UBA8260	f__UBA8260	g__CF-75	s__CF-75 sp005880445
1440_14	GCA_005889345	public genome	1	1	0	0	nothing_new_here	p__Dormibacterota	c__Dormibacteria	o__CF-121	f__CF-121	g__CF-13	s__CF-13 sp005889345
1440_11	GCA_005889395	public genome	3	2	1	0	old+new_onlyMAGsSRA	p__Dormibacterota	c__Dormibacteria	o__CF-121	f__CF-121	g__CF-13	s__CF-13 sp005889395
1338_1	GCA_005889405	public genome	2	2	0	0	nothing_new_here	p__Chloroflexota	c__Ellin6529	o__P2-11E	f__P2-11E	g__CF-39	s__CF-39 sp005889405
1336_2	GCA_005889445	public genome	1	1	0	0	nothing_new_here	p__Chloroflexota	c__Ellin6529	o__P2-11E	f__P2-11E	g__3-1-20CM-2-70-9	s__3-1-20CM-2-70-9 sp005889445
1409_4	GCA_005889475	public genome	1	1	0	0	nothing_new_here	p__Chloroflexota	c__Ellin6529	o__CSP1-4	f__CSP1-4	g__UBA5189	s__UBA5189 sp005889475
1436_12	GCA_005889495	public genome	1	1	0	0	nothing_new_here	p__Dormibacterota	c__Dormibacteria	o__Dormibacterales	f__Dormibacteraceae	g__40CM-4-65-16	s__40CM-4-65-16 sp005889495
1449_1	GCA_005889515	public genome	2	2	0	0	nothing_new_here	p__Dormibacterota	c__Dormibacteria	o__UBA8260	f__UBA8260	g__CF-96	s__CF-96 sp005889515
1440_6	GCA_005889535	public genome	1	1	0	0	nothing_new_here	p__Dormibacterota	c__Dormibacteria	o__CF-121	f__CF-121	g__CF-13	s__CF-13 sp005889535
1793_1	GCA_006569185	public genome	2	2	0	0	nothing_new_here	p__Chloroflexota	c__Anaerolineae	o__Caldilineales	f__Caldilineaceae	g__Litorilinea	s__Litorilinea aerophila
1298_0	GCA_007118095	public genome	1	1	0	0	nothing_new_here	p__Chloroflexota	c__Dehalococcoidia	o__UBA2991	f__UBA2991	g__SLAK01	s__SLAK01 sp007118095
763_2	GCA_007118555	public genome	1	1	0	0	nothing_new_here	p__Chloroflexota	c__Anaerolineae	o__UBA1429	f__UBA1429	g__UBA1429	s__UBA1429 sp007118555
1276_0	GCA_007121665	public genome	1	1	0	0	nothing_new_here	p__Chloroflexota	c__Dehalococcoidia	o__UBA2979	f__UBA2979	g__	s__
420_0	GCA_007122555	public genome	1	1	0	0	nothing_new_here	p__Chloroflexota	c__Chloroflexia	o__Thermomicrobiales	f__Thermomicrobiaceae	g__SLMJ01	s__SLMJ01 sp007122555
841_0	GCA_007123655	public genome	1	1	0	0	nothing_new_here	p__Chloroflexota	c__Chloroflexia	o__Thermomicrobiales	f__Thermomicrobiaceae	g__SLMJ01	s__SLMJ01 sp007123655
184_1	GCA_007123775	public genome	2	2	0	0	nothing_new_here	p__Chloroflexota	c__Anaerolineae	o__Promineofilales	f__Promineofilaceae	g__SLGK01	s__SLGK01 sp007123775
845_1	GCA_007125045	public genome	4	4	0	0	nothing_new_here	p__Chloroflexota	c__Anaerolineae	o__B4-G1	f__B4-G1	g__SKLM01	s__SKLM01 sp007123205
845_2	GCA_007125335	public genome	2	2	0	0	nothing_new_here	p__Chloroflexota	c__Anaerolineae	o__B4-G1	f__B4-G1	g__SKLM01	s__SKLM01 sp007118795
1166_0	GCA_007125545	public genome	1	1	0	0	nothing_new_here	p__Chloroflexota	c__Anaerolineae	o__B4-G1	f__SLSP01	g__PWVB01	s__PWVB01 sp007125545
271_1	GCA_007126555	public genome	2	2	0	0	nothing_new_here	p__Chloroflexota	c__Anaerolineae	o__Anaerolineales	f__Anaerolineaceae	g__Brevefilum	s__Brevefilum sp007119455
816_1	GCA_007126855	public genome	2	2	0	0	nothing_new_here	p__Chloroflexota	c__Dehalococcoidia	o__UBA2991	f__UBA2991	g__SLAK01	s__SLAK01 sp007126855
763_1	GCA_007132185	public genome	2	2	0	0	nothing_new_here	p__Chloroflexota	c__Anaerolineae	o__UBA1429	f__UBA1429	g__UBA1429	s__UBA1429 sp007132185
1499_1	GCA_007133615	public genome	3	3	0	0	nothing_new_here	p__Chloroflexota	c__Chloroflexia	o__Thermomicrobiales	f__Thermomicrobiaceae	g__SLMJ01	s__SLMJ01 sp007133615
791_1	GCA_007135205	public genome	3	3	0	0	nothing_new_here	p__Chloroflexota	c__Anaerolineae	o__UBA1429	f__UBA1429	g__SKLG01	s__SKLG01 sp007123335
272_0	GCA_007135845	public genome	1	1	0	0	nothing_new_here	p__Chloroflexota	c__Anaerolineae	o__Anaerolineales	f__Anaerolineaceae	g__Brevefilum	s__Brevefilum sp007135845
652_1	GCA_007279795	public genome	1	1	0	0	nothing_new_here	p__Chloroflexota	c__Dehalococcoidia	o__Dehalococcoidales	f__UBA5760	g__GCA-2688105	s__
683_0	GCA_007280145	public genome	1	1	0	0	nothing_new_here	p__Chloroflexota	c__Dehalococcoidia	o__GIF9	f__UBA5620	g__QYPU01	s__QYPU01 sp007280145
1984_0	GCA_007693385	public genome	1	1	0	0	nothing_new_here	p__Chloroflexota	c__Anaerolineae	o__SBR1031	f__A4b	g__J038	s__J038 sp007693385
1500_2	GCA_007695115	public genome	1	1	0	0	nothing_new_here	p__Chloroflexota	c__Chloroflexia	o__Thermomicrobiales	f__Thermomicrobiaceae	g__SLMJ01	s__SLMJ01 sp007695115
1596_1	GCA_008011965	public genome	1	1	0	0	nothing_new_here	p__Chloroflexota	c__Chloroflexia	o__Thermomicrobiales	f__	g__	s__
31_0	GCA_008326305	public genome	1	1	0	0	nothing_new_here	p__Chloroflexota	c__Ktedonobacteria	o__Ktedonobacterales	f__Ktedonobacteraceae	g__Dictyobacter	s__Dictyobacter sp008326305
983_2	GCA_008373095	public genome	1	1	0	0	nothing_new_here	p__Chloroflexota	c__Dehalococcoidia	o__SAR202	f__UBA826	g__UBA11996	s__UBA11996 sp002320875
2546_1	GCA_008373205	public genome	3	3	0	0	nothing_new_here	p__Chloroflexota	c__Dehalococcoidia	o__UBA1151	f__TMED-70	g__TMED-70	s__TMED-70 sp008373205
197_0	GCA_008501685	public genome	1	1	0	0	nothing_new_here	p__Chloroflexota	c__Anaerolineae	o__Anaerolineales	f__UBA11579	g__CFX15	s__CFX15 sp013112575
182_0	GCA_008501785	public genome	1	1	0	0	nothing_new_here	p__Chloroflexota	c__Anaerolineae	o__Promineofilales	f__Promineofilaceae	g__	s__
310_3	GCA_008635265	public genome	1	1	0	0	nothing_new_here	p__Chloroflexota	c__Anaerolineae	o__Anaerolineales	f__Anaerolineaceae	g__49-20	s__
1302_3	GCA_008838325	public genome	6	1	5	0	mostly_new_onlyMAGsSRA	p__Chloroflexota	c__Dehalococcoidia	o__UBA2991	f__UBA2991	g__Tepidiforma	s__Tepidiforma bonchosmolovskayae
2517_2	GCA_008933315	public genome	1	1	0	0	nothing_new_here	p__Chloroflexota	c__Anaerolineae	o__SBR1031	f__J027	g__CFX10	s__
30_0	GCA_008974265	public genome	1	1	0	0	nothing_new_here	p__Chloroflexota	c__Ktedonobacteria	o__Ktedonobacterales	f__Ktedonobacteraceae	g__Dictyobacter	s__Dictyobacter vulcani
18_4	GCA_008974285	public genome	1	1	0	0	nothing_new_here	p__Chloroflexota	c__Ktedonobacteria	o__Ktedonobacterales	f__Ktedonobacteraceae	g__Thermogemmatispora	s__Thermogemmatispora aurantia
1587_0	GCA_009268125	public genome	1	1	0	0	nothing_new_here	p__Chloroflexota	c__Chloroflexia	o__Chloroflexales	f__Roseiflexaceae	g__SDU3-3	s__SDU3-3 sp009268125
35_0	GCA_009377635	public genome	1	1	0	0	nothing_new_here	p__Chloroflexota	c__UBA6077	o__UBA6077	f__SHYK01	g__WHTR01	s__WHTR01 sp009377635
1057_0	GCA_009377665	public genome	1	1	0	0	nothing_new_here	p__Chloroflexota	c__Dehalococcoidia	o__WHTO01	f__WHTO01	g__WHTO01	s__WHTO01 sp009377665
1040_0	GCA_009377715	public genome	1	1	0	0	nothing_new_here	p__Chloroflexota	c__Dehalococcoidia	o__SM23-28-2	f__WHTN01	g__WHTN01	s__WHTN01 sp009377715
1207_0	GCA_009377745	public genome	1	1	0	0	nothing_new_here	p__Chloroflexota	c__Dehalococcoidia	o__DSTF01	f__WHTK01	g__WHTK01	s__WHTK01 sp009377745
1282_1	GCA_009379925	public genome	1	1	0	0	nothing_new_here	p__Chloroflexota	c__Dehalococcoidia	o__UBA2979	f__UBA2979	g__WHSU01	s__WHSU01 sp009379925
1000_3	GCA_009391195	public genome	1	1	0	0	nothing_new_here	p__Chloroflexota	c__Dehalococcoidia	o__SAR202	f__UBA826	g__GCA-002712965	s__GCA-002712965 sp009391195
1042_0	GCA_009391225	public genome	1	1	0	0	nothing_new_here	p__Chloroflexota	c__Dehalococcoidia	o__UBA2985	f__UBA2985	g__VEXC01	s__VEXC01 sp009391225
2544_0	GCA_009391235	public genome	1	1	0	0	nothing_new_here	p__Chloroflexota	c__Dehalococcoidia	o__UBA3495	f__GCA-2712585	g__VEXD01	s__VEXD01 sp009391235
504_0	GCA_009391275	public genome	1	1	0	0	nothing_new_here	p__Chloroflexota	c__Dehalococcoidia	o__UBA3495	f__GCA-2712585	g__VEXF01	s__VEXF01 sp009391275
832_2	GCA_009391415	public genome	7	7	0	0	nothing_new_here	p__Chloroflexota	c__Dehalococcoidia	o__UBA1151	f__Bin127	g__GCA-002725925	s__GCA-002725925 sp009392785
724_1	GCA_009391465	public genome	4	4	0	0	nothing_new_here	p__Chloroflexota	c__Dehalococcoidia	o__UBA2963	f__UBA2963	g__UBA2963	s__UBA2963 sp003215215
441_0	GCA_009391535	public genome	1	1	0	0	nothing_new_here	p__Chloroflexota	c__Dehalococcoidia	o__UBA2985	f__UBA2985	g__VFHP01	s__VFHP01 sp009391535
2539_1	GCA_009391585	public genome	3	3	0	0	nothing_new_here	p__Chloroflexota	c__Dehalococcoidia	o__SAR202	f__GCA-2722455	g__GCA-2722455	s__GCA-2722455 sp002722455
2082_0	GCA_009391835	public genome	1	1	0	0	nothing_new_here	p__Chloroflexota	c__Anaerolineae	o__Anaerolineales	f__UBA11579	g__QWJF01	s__QWJF01 sp009391835
1277_0	GCA_009391845	public genome	1	1	0	0	nothing_new_here	p__Chloroflexota	c__Dehalococcoidia	o__UBA2979	f__UBA2979	g__UBA6627	s__UBA6627 sp009391845
2521_0	GCA_009392005	public genome	1	1	0	0	nothing_new_here	p__Chloroflexota	c__Dehalococcoidia	o__UBA6926	f__VFHL01	g__VFHL01	s__VFHL01 sp009392005
2538_0	GCA_009392195	public genome	1	1	0	0	nothing_new_here	p__Chloroflexota	c__Dehalococcoidia	o__SAR202	f__OSU-TB39	g__OSU-TB39	s__OSU-TB39 sp009392195
832_3	GCA_009392215	public genome	1	1	0	0	nothing_new_here	p__Chloroflexota	c__Dehalococcoidia	o__UBA1151	f__Bin127	g__GCA-002725925	s__GCA-002725925 sp009392215
1103_1	GCA_009392255	public genome	2	2	0	0	nothing_new_here	p__Chloroflexota	c__Dehalococcoidia	o__UBA3495	f__UBA3495	g__UBA9611	s__UBA9611 sp002721995
2537_2	GCA_009392295	public genome	1	1	0	0	nothing_new_here	p__Chloroflexota	c__Dehalococcoidia	o__SAR202	f__GCA-2719675	g__GCA-2719675	s__GCA-2719675 sp009392295
1101_1	GCA_009392375	public genome	5	5	0	0	nothing_new_here	p__Chloroflexota	c__Dehalococcoidia	o__UBA3495	f__UBA3495	g__UBA9611	s__UBA9611 sp002328185
706_2	GCA_009619075	public genome	2	1	1	0	old+new_onlyMAGsSRA	p__Chloroflexota	c__Dehalococcoidia	o__GIF9	f__AB-539-J10	g__20-14-all-45-10	s__20-14-all-45-10 sp009619075
1287_0	GCA_009692625	public genome	1	1	0	0	nothing_new_here	p__Chloroflexota	c__Dehalococcoidia	o__UBA2979	f__UBA2979	g__SURF-43	s__
1020_0	GCA_009692665	public genome	1	1	0	0	nothing_new_here	p__Chloroflexota	c__Dehalococcoidia	o__UBA1127	f__SHYT01	g__SHYT01	s__SHYT01 sp009692665
1284_0	GCA_009692685	public genome	1	1	0	0	nothing_new_here	p__Chloroflexota	c__Dehalococcoidia	o__UBA2979	f__UBA2979	g__RBC038	s__RBC038 sp009692685
1288_0	GCA_009692705	public genome	1	1	0	0	nothing_new_here	p__Chloroflexota	c__Dehalococcoidia	o__UBA2979	f__UBA2979	g__SHYR01	s__SHYR01 sp009692705
1285_1	GCA_009692725	public genome	1	1	0	0	nothing_new_here	p__Chloroflexota	c__Dehalococcoidia	o__UBA2979	f__UBA2979	g__SHYP01	s__SHYP01 sp009692725
219_1	GCA_009692745	public genome	1	1	0	0	nothing_new_here	p__Chloroflexota	c__Anaerolineae	o__UCB3	f__SHYO01	g__SHYO01	s__SHYO01 sp009692745
1274_0	GCA_009692765	public genome	1	1	0	0	nothing_new_here	p__Chloroflexota	c__Dehalococcoidia	o__UBA2979	f__UBA2979	g__SHYQ01	s__SHYQ01 sp009692765
1328_0	GCA_009692785	public genome	1	1	0	0	nothing_new_here	p__Chloroflexota	c__Ellin6529	o__P2-11E	f__P2-11E	g__SHYN01	s__SHYN01 sp009692785
1038_1	GCA_009692805	public genome	1	1	0	0	nothing_new_here	p__Chloroflexota	c__Dehalococcoidia	o__SHYM01	f__SHYM01	g__SHYM01	s__SHYM01 sp009692805
821_0	GCA_009692825	public genome	1	1	0	0	nothing_new_here	p__Chloroflexota	c__Dehalococcoidia	o__SHYB01	f__SHYL01	g__SHYL01	s__SHYL01 sp009692825
1606_0	GCA_009692845	public genome	1	1	0	0	nothing_new_here	p__Chloroflexota	c__UBA6077	o__UBA6077	f__SHYK01	g__SHYK01	s__SHYK01 sp009692845
934_2	GCA_009692865	public genome	1	1	0	0	nothing_new_here	p__Chloroflexota	c__Dehalococcoidia	o__GCA-2717565	f__GCA-2717565	g__SHYH01	s__SHYH01 sp009692865
82_8	GCA_009692905	public genome	1	1	0	0	nothing_new_here	p__Chloroflexota	c__Ellin6529	o__CSP1-4	f__UBA10416	g__UBA10416	s__UBA10416 sp009692905
1011_0	GCA_009692935	public genome	1	1	0	0	nothing_new_here	p__Chloroflexota	c__Dehalococcoidia	o__SHYD01	f__SHYD01	g__SHYE01	s__SHYE01 sp009692935
1657_0	GCA_009692945	public genome	1	1	0	0	nothing_new_here	p__Chloroflexota	c__Dehalococcoidia	o__SHYD01	f__SHYD01	g__SHYD01	s__SHYD01 sp009692945
859_0	GCA_009692985	public genome	1	1	0	0	nothing_new_here	p__Chloroflexota	c__Dehalococcoidia	o__UBA6952	f__SHYF01	g__SHYF01	s__SHYF01 sp009692985
1017_0	GCA_009693005	public genome	1	1	0	0	nothing_new_here	p__Chloroflexota	c__Dehalococcoidia	o__SHYD01	f__SHYC01	g__SHYC01	s__SHYC01 sp009693005
938_0	GCA_009693015	public genome	1	1	0	0	nothing_new_here	p__Chloroflexota	c__Dehalococcoidia	o__SHYB01	f__SHYB01	g__SHYB01	s__SHYB01 sp009693015
1032_0	GCA_009693045	public genome	1	1	0	0	nothing_new_here	p__Chloroflexota	c__Dehalococcoidia	o__UBA1127	f__SHYT01	g__SHXZ01	s__SHXZ01 sp009693045
1033_0	GCA_009693055	public genome	1	1	0	0	nothing_new_here	p__Chloroflexota	c__Dehalococcoidia	o__UBA1127	f__SHYT01	g__SHYA01	s__SHYA01 sp009693055
958_2	GCA_009693075	public genome	1	1	0	0	nothing_new_here	p__Chloroflexota	c__Dehalococcoidia	o__UBA3495	f__UBA3495	g__SHYG01	s__SHYG01 sp009692925
1313_0	GCA_009693105	public genome	1	1	0	0	nothing_new_here	p__Chloroflexota	c__Dehalococcoidia	o__SHXV01	f__SHXV01	g__SHXV01	s__SHXV01 sp009693105
756_0	GCA_009693115	public genome	1	1	0	0	nothing_new_here	p__Chloroflexota	c__Dehalococcoidia	o__UBA1151	f__SHXW01	g__SHXW01	s__SHXW01 sp009693115
931_2	GCA_009693165	public genome	1	1	0	0	nothing_new_here	p__Chloroflexota	c__UBA2235	o__UBA12225	f__UBA12225	g__UBA12225	s__UBA12225 sp009693165
2233_1	GCA_009772985	public genome	1	1	0	0	nothing_new_here	p__Chloroflexota	c__Anaerolineae	o__Anaerolineales	f__EnvOPS12	g__UBA877	s__UBA877 sp009772985
367_0	GCA_009773005	public genome	1	1	0	0	nothing_new_here	p__Chloroflexota	c__Anaerolineae	o__Anaerolineales	f__Anaerolineaceae	g__UBA6107	s__UBA6107 sp009773005
2364_0	GCA_009776735	public genome	1	1	0	0	nothing_new_here	p__Chloroflexota	c__Dehalococcoidia	o__Dehalococcoidales	f__UBA1222	g__WRNG01	s__WRNG01 sp009776735
481_0	GCA_009779255	public genome	1	1	0	0	nothing_new_here	p__Chloroflexota	c__Dehalococcoidia	o__Dehalococcoidales	f__UBA1222	g__WREQ01	s__WREQ01 sp009779255
2355_2	GCA_009784845	public genome	1	1	0	0	nothing_new_here	p__Chloroflexota	c__Dehalococcoidia	o__Dehalococcoidales	f__UBA1222	g__WRNG01	s__WRNG01 sp009784845
2356_0	GCA_009786345	public genome	1	1	0	0	nothing_new_here	p__Chloroflexota	c__Dehalococcoidia	o__Dehalococcoidales	f__UBA1222	g__WRNG01	s__WRNG01 sp009786345
1280_5	GCA_009837505	public genome	6	4	2	0	old+new_onlyMAGsSRA	p__Chloroflexota	c__Dehalococcoidia	o__UBA2979	f__UBA2979	g__VXMT01	s__VXMT01 sp009837285
677_2	GCA_009837685	public genome	1	1	0	0	nothing_new_here	p__Chloroflexota	c__Dehalococcoidia	o__UBA1151	f__Bin127	g__Bin127	s__Bin127 sp009837685
677_1	GCA_009838175	public genome	2	2	0	0	nothing_new_here	p__Chloroflexota	c__Dehalococcoidia	o__UBA1151	f__Bin127	g__Bin127	s__Bin127 sp009838175
1306_2	GCA_009838385	public genome	2	2	0	0	nothing_new_here	p__Chloroflexota	c__Dehalococcoidia	o__UBA2991	f__UBA2991	g__UBA2991	s__UBA2991 sp009838385
986_1	GCA_009838465	public genome	5	3	2	0	old+new_onlyMAGsSRA	p__Chloroflexota	c__Dehalococcoidia	o__SAR202	f__UBA11138	g__VXRN01	s__VXRN01 sp009838465
987_2	GCA_009838595	public genome	1	1	0	0	nothing_new_here	p__Chloroflexota	c__Dehalococcoidia	o__SAR202	f__UBA11138	g__Bin90	s__Bin90 sp009838595
1634_3	GCA_009838625	public genome	2	1	1	0	old+new_onlyMAGsSRA	p__Chloroflexota	c__Anaerolineae	o__Caldilineales	f__Caldilineaceae	g__Bin5	s__Bin5 sp009838625
1630_7	GCA_009839425	public genome	2	1	1	0	old+new_onlyMAGsSRA	p__Chloroflexota	c__UBA11872	o__UBA11872	f__UBA11872	g__UBA11872	s__UBA11872 sp009839425
1306_5	GCA_009839725	public genome	7	5	2	0	mostly_old	p__Chloroflexota	c__Dehalococcoidia	o__UBA2991	f__UBA2991	g__UBA2991	s__UBA2991 sp009839725
1014_4	GCA_009839775	public genome	2	1	1	0	old+new_onlyMAGsSRA	p__Chloroflexota	c__UBA11872	o__VXOZ01	f__VXOZ01	g__VXOZ01	s__VXOZ01 sp009839775
1280_1	GCA_009839925	public genome	3	2	1	0	old+new_onlyMAGsSRA	p__Chloroflexota	c__Dehalococcoidia	o__UBA2979	f__UBA2979	g__VXMT01	s__VXMT01 sp009839925
1084_5	GCA_009840135	public genome	2	1	1	0	old+new_onlyMAGsSRA	p__Chloroflexota	c__Dehalococcoidia	o__UBA3495	f__UBA3495	g__Bin22	s__Bin22 sp009840135
992_2	GCA_009840165	public genome	2	1	1	0	old+new_onlyMAGsSRA	p__Chloroflexota	c__Dehalococcoidia	o__UBA3495	f__UBA3495	g__Bin87	s__Bin87 sp009840165
1634_7	GCA_009840225	public genome	4	2	2	0	old+new_onlyMAGsSRA	p__Chloroflexota	c__Anaerolineae	o__Caldilineales	f__Caldilineaceae	g__Bin5	s__Bin5 sp009840225
812_1	GCA_009840665	public genome	2	1	1	0	old+new_onlyMAGsSRA	p__Chloroflexota	c__Dehalococcoidia	o__UBA1151	f__Bin127	g__Bin127	s__
988_1	GCA_009840775	public genome	2	1	1	0	old+new_onlyMAGsSRA	p__Chloroflexota	c__Dehalococcoidia	o__SAR202	f__UBA11138	g__Bin90	s__
1280_4	GCA_009840945	public genome	3	2	1	0	old+new_onlyMAGsSRA	p__Chloroflexota	c__Dehalococcoidia	o__UBA2979	f__UBA2979	g__VXMT01	s__VXMT01 sp009840945
1280_2	GCA_009840965	public genome	3	2	1	0	old+new_onlyMAGsSRA	p__Chloroflexota	c__Dehalococcoidia	o__UBA2979	f__UBA2979	g__VXMT01	s__VXMT01 sp009840965
943_1	GCA_009841045	public genome	2	1	1	0	old+new_onlyMAGsSRA	p__Chloroflexota	c__Dehalococcoidia	o__UBA6926	f__UBA6926	g__VXMO01	s__VXMO01 sp009841045
1632_4	GCA_009841145	public genome	9	5	4	0	old+new_onlyMAGsSRA	p__Chloroflexota	c__Anaerolineae	o__Caldilineales	f__Bin34	g__Bin34	s__Bin34 sp009841145
1240_10	GCA_009841545	public genome	11	7	4	0	old+new_onlyMAGsSRA	p__Chloroflexota	c__Dehalococcoidia	o__Bin125	f__Bin125	g__Bin125	s__Bin125 sp009838735
968_1	GCA_009841605	public genome	5	3	2	0	old+new_onlyMAGsSRA	p__Chloroflexota	c__Dehalococcoidia	o__SAR202	f__VXLM01	g__VXLM01	s__VXLM01 sp009841605
1206_3	GCA_009842905	public genome	5	4	1	0	mostly_old	p__Chloroflexota	c__Dehalococcoidia	o__UBA2963	f__UBA2963	g__Bin16	s__Bin16 sp009838965
1279_1	GCA_009843585	public genome	2	1	1	0	old+new_onlyMAGsSRA	p__Chloroflexota	c__Dehalococcoidia	o__UBA2979	f__UBA2979	g__VYDC01	s__VYDC01 sp009843585
1634_15	GCA_009843665	public genome	1	1	0	0	nothing_new_here	p__Chloroflexota	c__Anaerolineae	o__Caldilineales	f__Caldilineaceae	g__Bin5	s__
2212_0	GCA_009885445	public genome	1	1	0	0	nothing_new_here	p__Chloroflexota	c__Anaerolineae	o__Anaerolineales	f__EnvOPS12	g__UBA7227	s__UBA7227 sp009885445
2203_0	GCA_009885525	public genome	1	1	0	0	nothing_new_here	p__Chloroflexota	c__Anaerolineae	o__Anaerolineales	f__EnvOPS12	g__OLB14	s__OLB14 sp009885525
2204_0	GCA_009885945	public genome	1	1	0	0	nothing_new_here	p__Chloroflexota	c__Anaerolineae	o__Anaerolineales	f__EnvOPS12	g__OLB14	s__OLB14 sp009885945
1846_2	GCA_009908585	public genome	1	1	0	0	nothing_new_here	p__Chloroflexota	c__Anaerolineae	o__B4-G1	f__SLSP01	g__JAAAOZ01	s__JAAAOZ01 sp009908585
82_1	GCA_009919005	public genome	2	2	0	0	nothing_new_here	p__Chloroflexota	c__Ellin6529	o__CSP1-4	f__UBA10416	g__UBA10416	s__UBA10416 sp009919005
82_3	GCA_009925905	public genome	1	1	0	0	nothing_new_here	p__Chloroflexota	c__Ellin6529	o__CSP1-4	f__UBA10416	g__UBA10416	s__UBA10416 sp009925905
1574_3	GCA_009929835	public genome	1	1	0	0	nothing_new_here	p__Chloroflexota	c__Chloroflexia	o__Chloroflexales	f__Chloroflexaceae	g__Chloroploca	s__
2549_1	GCA_009937255	public genome	2	2	0	0	nothing_new_here	p__Chloroflexota	c__Dehalococcoidia	o__UBA1151	f__TMED-70	g__TMED-70	s__TMED-70 sp009937255
1535_1	GCA_009937635	public genome	2	2	0	0	nothing_new_here	p__Chloroflexota	c__Anaerolineae	o__Promineofilales	f__Promineofilaceae	g__JAACFF01	s__JAACFF01 sp009937635
382_0	GCA_010092775	public genome	1	1	0	0	nothing_new_here	p__Chloroflexota	c__Anaerolineae	o__SBR1031	f__UBA3940	g__TC-71	s__TC-71 sp010092775
1943_0	GCA_010092805	public genome	1	1	0	0	nothing_new_here	p__Chloroflexota	c__Anaerolineae	o__SBR1031	f__A4b	g__OLB15	s__OLB15 sp010092805
9_0	GCA_010092845	public genome	1	1	0	0	nothing_new_here	p__Chloroflexota	c__Anaerolineae	o__SBR1031	f__J027	g__J027	s__J027 sp010092845
1878_0	GCA_010092855	public genome	1	1	0	0	nothing_new_here	p__Chloroflexota	c__Anaerolineae	o__SBR1031	f__UBA2029	g__TC-15	s__TC-15 sp010092855
1786_0	GCA_010092885	public genome	1	1	0	0	nothing_new_here	p__Chloroflexota	c__Anaerolineae	o__SBR1031	f__UBA3940	g__TC-195	s__TC-195 sp010092885
1257_0	GCA_011039825	public genome	1	1	0	0	nothing_new_here	p__Chloroflexota	c__Anaerolineae	o__B4-G1	f__B4-G1	g__	s__
201_1	GCA_011039935	public genome	3	3	0	0	nothing_new_here	p__Chloroflexota	c__Anaerolineae	o__Anaerolineales	f__UBA11858	g__B10-G9	s__
1755_1	GCA_011041825	public genome	2	2	0	0	nothing_new_here	p__Chloroflexota	c__Anaerolineae	o__SpSt-600	f__SpSt-600	g__HyVt-206	s__HyVt-206 sp011041825
2036_1	GCA_011047095	public genome	2	1	1	0	old+new_onlyMAGsSRA	p__Chloroflexota	c__Anaerolineae	o__Anaerolineales	f__UBA6663	g__DSNW01	s__DSNW01 sp011047095
901_4	GCA_011047455	public genome	5	3	2	0	old+new_onlyMAGsSRA	p__Chloroflexota	c__Dehalococcoidia	o__SM23-28-2	f__HRbin24	g__HRBIN24	s__HRBIN24 sp011047455
1730_1	GCA_011048175	public genome	3	2	1	0	old+new_onlyMAGsSRA	p__Chloroflexota	c__Anaerolineae	o__DSLN01	f__DSLN01	g__DSLN01	s__DSLN01 sp011048175
952_1	GCA_011048275	public genome	3	1	1	1	old+new_MAGsSRA+Sample	p__Chloroflexota	c__Dehalococcoidia	o__UBA2991	f__UBA2991	g__HRBIN29	s__HRBIN29 sp011048275
2141_0	GCA_011051635	public genome	1	1	0	0	nothing_new_here	p__Chloroflexota	c__Anaerolineae	o__Anaerolineales	f__DRKV01	g__DRKV01	s__DRKV01 sp011051635
1796_0	GCA_011051745	public genome	1	1	0	0	nothing_new_here	p__Chloroflexota	c__Anaerolineae	o__SBR1031	f__UBA3940	g__DRKO01	s__DRKO01 sp011051745
1738_1	GCA_011052755	public genome	1	1	0	0	nothing_new_here	p__Chloroflexota	c__Anaerolineae	o__B4-G1	f__DUEL01	g__	s__
1736_7	GCA_011053895	public genome	3	1	2	0	old+new_onlyMAGsSRA	p__Chloroflexota	c__Anaerolineae	o__B4-G1	f__DUEL01	g__SpSt-77	s__SpSt-77 sp011053895
399_0	GCA_011055405	public genome	1	1	0	0	nothing_new_here	p__Chloroflexota	c__Anaerolineae	o__UBA7937	f__B3-Chlor	g__	s__
1654_1	GCA_011057285	public genome	3	1	1	1	old+new_MAGsSRA+Sample	p__Chloroflexota	c__Dehalococcoidia	o__SpSt-223	f__SpSt-223	g__SpSt-223	s__SpSt-223 sp011053995
1732_3	GCA_011057325	public genome	2	1	1	0	old+new_onlyMAGsSRA	p__Chloroflexota	c__Dehalococcoidia	o__DSGV01	f__DSGV01	g__DSGV01	s__DSGV01 sp011057325
635_2	GCA_011170285	public genome	1	1	0	0	nothing_new_here	p__Chloroflexota	c__Dehalococcoidia	o__Dehalococcoidales	f__UBA5760	g__W498	s__W498 sp011170285
614_1	GCA_011170375	public genome	2	1	1	0	old+new_onlyMAGsSRA	p__Chloroflexota	c__Dehalococcoidia	o__Dehalococcoidales	f__Fen-1064	g__W589	s__W589 sp011170375
548_0	GCA_011170385	public genome	1	1	0	0	nothing_new_here	p__Chloroflexota	c__Dehalococcoidia	o__Dehalococcoidales	f__UBA5627	g__W693	s__W693 sp011170385
876_0	GCA_011170395	public genome	1	1	0	0	nothing_new_here	p__Chloroflexota	c__Dehalococcoidia	o__JdFR-54	f__JdFR-54	g__JdFR-54	s__JdFR-54 sp002011475
615_2	GCA_011171075	public genome	2	1	1	0	old+new_onlyMAGsSRA	p__Chloroflexota	c__Dehalococcoidia	o__Dehalococcoidales	f__Fen-1064	g__W589	s__W589 sp011171075
946_1	GCA_011174795	public genome	2	1	1	0	old+new_onlyMAGsSRA	p__Chloroflexota	c__Dehalococcoidia	o__SZUA-161	f__SZUA-161	g__W281	s__W281 sp011174795
663_3	GCA_011174815	public genome	2	1	1	0	old+new_onlyMAGsSRA	p__Chloroflexota	c__Dehalococcoidia	o__Dehalococcoidales	f__RBG-16-60-22	g__E44-bin89	s__E44-bin89 sp011174815
1243_1	GCA_011174825	public genome	2	1	1	0	old+new_onlyMAGsSRA	p__Chloroflexota	c__Anaerolineae	o__Anaerolineales	f__E44-bin32	g__DUEZ01	s__DUEZ01 sp011174825
1243_3	GCA_011174845	public genome	1	1	0	0	nothing_new_here	p__Chloroflexota	c__Anaerolineae	o__Anaerolineales	f__E44-bin32	g__DUEZ01	s__DUEZ01 sp011174845
2142_0	GCA_011176535	public genome	1	1	0	0	nothing_new_here	p__Chloroflexota	c__Anaerolineae	o__Anaerolineales	f__DRMV01	g__DUEP01	s__DUEP01 sp011176535
1787_1	GCA_011176545	public genome	1	1	0	0	nothing_new_here	p__Chloroflexota	c__Anaerolineae	o__DUEN01	f__DUEN01	g__DUEN01	s__DUEN01 sp011176545
2016_0	GCA_011176555	public genome	1	1	0	0	nothing_new_here	p__Chloroflexota	c__Anaerolineae	o__Caldilineales	f__J102	g__DUEF01	s__DUEF01 sp011176555
157_1	GCA_011176615	public genome	2	2	0	0	nothing_new_here	p__Chloroflexota	c__Anaerolineae	o__Anaerolineales	f__UBA11858	g__G519	s__G519 sp011176615
651_1	GCA_011176635	public genome	1	1	0	0	nothing_new_here	p__Chloroflexota	c__Dehalococcoidia	o__Dehalococcoidales	f__E44-bin88	g__E44-bin88	s__E44-bin88 sp011176635
643_2	GCA_011176655	public genome	5	2	3	0	old+new_onlyMAGsSRA	p__Chloroflexota	c__Dehalococcoidia	o__Dehalococcoidales	f__UBA5760	g__DUEB01	s__DUEB01 sp011176655
248_0	GCA_011176685	public genome	1	1	0	0	nothing_new_here	p__Chloroflexota	c__Anaerolineae	o__Anaerolineales	f__Anaerolineaceae	g__A373	s__A373 sp011176685
635_4	GCA_011191875	public genome	1	1	0	0	nothing_new_here	p__Chloroflexota	c__Dehalococcoidia	o__Dehalococcoidales	f__UBA5760	g__W498	s__W498 sp011191875
602_1	GCA_011191975	public genome	2	1	1	0	old+new_onlyMAGsSRA	p__Chloroflexota	c__Dehalococcoidia	o__Dehalococcoidales	f__UBA2162	g__MGML01	s__MGML01 sp011191975
645_0	GCA_011191985	public genome	1	1	0	0	nothing_new_here	p__Chloroflexota	c__Dehalococcoidia	o__Dehalococcoidales	f__W111	g__W111	s__W111 sp011191985
596_2	GCA_011192005	public genome	2	1	1	0	old+new_onlyMAGsSRA	p__Chloroflexota	c__Dehalococcoidia	o__Dehalococcoidales	f__RBG-16-60-22	g__W425	s__W425 sp011192005
731_1	GCA_011192015	public genome	3	2	1	0	old+new_onlyMAGsSRA	p__Chloroflexota	c__Anaerolineae	o__Anaerolineales	f__E44-bin32	g__W1033	s__W1033 sp011192015
528_0	GCA_011192055	public genome	1	1	0	0	nothing_new_here	p__Chloroflexota	c__Dehalococcoidia	o__Dehalococcoidales	f__Fen-1064	g__DUES01	s__DUES01 sp011192055
641_0	GCA_011192075	public genome	1	1	0	0	nothing_new_here	p__Chloroflexota	c__Dehalococcoidia	o__Dehalococcoidales	f__UBA5760	g__S120	s__S120 sp011192075
660_0	GCA_011192105	public genome	1	1	0	0	nothing_new_here	p__Chloroflexota	c__Dehalococcoidia	o__Dehalococcoidales	f__RBG-16-60-22	g__JdFR-56	s__JdFR-56 sp002011495
1737_2	GCA_011192125	public genome	1	1	0	0	nothing_new_here	p__Chloroflexota	c__Anaerolineae	o__B4-G1	f__DUEL01	g__DUEL01	s__DUEL01 sp011192125
1251_1	GCA_011192155	public genome	2	2	0	0	nothing_new_here	p__Chloroflexota	c__Anaerolineae	o__B4-G1	f__B4-G1	g__B4-G1	s__B4-G1 sp003648025
1835_1	GCA_011192175	public genome	1	1	0	0	nothing_new_here	p__Chloroflexota	c__Anaerolineae	o__B4-G1	f__SLSP01	g__G713	s__G713 sp011192175
1246_1	GCA_011192185	public genome	3	3	0	0	nothing_new_here	p__Chloroflexota	c__Anaerolineae	o__B4-G1	f__B4-G1	g__B30-G15	s__B30-G15 sp003648085
2059_1	GCA_011192195	public genome	2	2	0	0	nothing_new_here	p__Chloroflexota	c__Anaerolineae	o__4572-78	f__4572-78	g__DUEH01	s__DUEH01 sp011192195
2136_1	GCA_011322445	public genome	3	3	0	0	nothing_new_here	p__Chloroflexota	c__Anaerolineae	o__Anaerolineales	f__DRMV01	g__DRMV01	s__DRMV01 sp011322445
1715_0	GCA_011322725	public genome	1	1	0	0	nothing_new_here	p__Chloroflexota	c__Anaerolineae	o__JAAYZQ01	f__JAAYZQ01	g__	s__
903_1	GCA_011328975	public genome	2	1	1	0	old+new_onlyMAGsSRA	p__Chloroflexota	c__Dehalococcoidia	o__Dehalococcoidales	f__UBA3254	g__UBA3254	s__UBA3254 sp011328975
2033_1	GCA_011329365	public genome	2	1	1	0	old+new_onlyMAGsSRA	p__Chloroflexota	c__Anaerolineae	o__Anaerolineales	f__UBA4823	g__DSTM01	s__DSTM01 sp011329365
1659_0	GCA_011332195	public genome	1	1	0	0	nothing_new_here	p__Chloroflexota	c__Anaerolineae	o__Anaerolineales	f__EnvOPS12	g__OLB14	s__
2267_2	GCA_011362465	public genome	2	1	1	0	old+new_onlyMAGsSRA	p__Chloroflexota	c__Anaerolineae	o__Anaerolineales	f__EnvOPS12	g__UBA5195	s__
1605_2	GCA_011362805	public genome	2	1	1	0	old+new_onlyMAGsSRA	p__Chloroflexota	c__Anaerolineae	o__4572-78	f__NAK82	g__NAK82	s__NAK82 sp011362805
2181_2	GCA_011367515	public genome	2	1	1	0	old+new_onlyMAGsSRA	p__Chloroflexota	c__Anaerolineae	o__Anaerolineales	f__EnvOPS12	g__OLB14	s__
2227_1	GCA_011368195	public genome	3	1	2	0	old+new_onlyMAGsSRA	p__Chloroflexota	c__Anaerolineae	o__Anaerolineales	f__UBA4823	g__DSWF01	s__DSWF01 sp011368195
562_1	GCA_011371305	public genome	1	1	0	0	nothing_new_here	p__Chloroflexota	c__Anaerolineae	o__Caldilineales	f__J102	g__M2005	s__M2005 sp011371305
2092_0	GCA_011372155	public genome	1	1	0	0	nothing_new_here	p__Chloroflexota	c__Anaerolineae	o__B4-G1	f__SLSP01	g__	s__
1105_1	GCA_011372405	public genome	1	1	0	0	nothing_new_here	p__Chloroflexota	c__Dehalococcoidia	o__GIF9	f__AB-539-J10	g__	s__
893_1	GCA_011373495	public genome	2	1	1	0	old+new_onlyMAGsSRA	p__Chloroflexota	c__Dehalococcoidia	o__SM23-28-2	f__HRbin24	g__DRWY01	s__DRWY01 sp011373495
1697_2	GCA_011373735	public genome	2	1	1	0	old+new_onlyMAGsSRA	p__Chloroflexota	c__Anaerolineae	o__SpSt-313	f__SpSt-313	g__DRWE01	s__DRWE01 sp011373735
205_1	GCA_011374325	public genome	2	2	0	0	nothing_new_here	p__Chloroflexota	c__Anaerolineae	o__Anaerolineales	f__E44-bin32	g__	s__
901_3	GCA_011380505	public genome	6	3	2	1	old+new_MAGsSRA+Sample	p__Chloroflexota	c__Dehalococcoidia	o__SM23-28-2	f__HRbin24	g__HRBIN24	s__HRBIN24 sp011380505
1697_1	GCA_011388385	public genome	3	1	2	0	old+new_onlyMAGsSRA	p__Chloroflexota	c__Anaerolineae	o__SpSt-313	f__SpSt-313	g__DRWE01	s__DRWE01 sp011388385
1707_1	GCA_011388535	public genome	5	3	2	0	old+new_onlyMAGsSRA	p__Chloroflexota	c__Chloroflexia	o__DTKN01	f__DTKN01	g__DRUS01	s__DRUS01 sp011388535
1737_3	GCA_011388675	public genome	1	1	0	0	nothing_new_here	p__Chloroflexota	c__Anaerolineae	o__B4-G1	f__DUEL01	g__DUEL01	s__DUEL01 sp011388675
1634_10	GCA_011523365	public genome	1	1	0	0	nothing_new_here	p__Chloroflexota	c__Anaerolineae	o__Caldilineales	f__Caldilineaceae	g__Bin5	s__Bin5 sp011523365
1965_2	GCA_011523515	public genome	1	1	0	0	nothing_new_here	p__Chloroflexota	c__Anaerolineae	o__SBR1031	f__A4b	g__UBA6055	s__UBA6055 sp011523515
1963_2	GCA_011523545	public genome	1	1	0	0	nothing_new_here	p__Chloroflexota	c__Anaerolineae	o__SBR1031	f__A4b	g__UBA6055	s__UBA6055 sp011523545
1785_1	GCA_011523615	public genome	2	1	1	0	old+new_onlyMAGsSRA	p__Chloroflexota	c__Anaerolineae	o__SBR1031	f__A4b	g__WTGJ01	s__WTGJ01 sp011523615
1963_6	GCA_011523705	public genome	1	1	0	0	nothing_new_here	p__Chloroflexota	c__Anaerolineae	o__SBR1031	f__A4b	g__UBA6055	s__UBA6055 sp011523705
1962_1	GCA_011523735	public genome	1	1	0	0	nothing_new_here	p__Chloroflexota	c__Anaerolineae	o__SBR1031	f__A4b	g__UBA6055	s__UBA6055 sp011523735
1630_5	GCA_011523785	public genome	1	1	0	0	nothing_new_here	p__Chloroflexota	c__UBA11872	o__UBA11872	f__UBA11872	g__UBA11872	s__UBA11872 sp011523785
531_0	GCA_011524645	public genome	1	1	0	0	nothing_new_here	p__Chloroflexota	c__Anaerolineae	o__Promineofilales	f__Promineofilaceae	g__WTJY01	s__WTJY01 sp011524645
1961_3	GCA_011525385	public genome	1	1	0	0	nothing_new_here	p__Chloroflexota	c__Anaerolineae	o__SBR1031	f__A4b	g__UBA6055	s__UBA6055 sp011525385
183_0	GCA_011525915	public genome	1	1	0	0	nothing_new_here	p__Chloroflexota	c__Anaerolineae	o__Promineofilales	f__Promineofilaceae	g__CAADGU01	s__CAADGU01 sp011525915
291_1	GCA_011620445	public genome	1	1	0	0	nothing_new_here	p__Chloroflexota	c__Anaerolineae	o__Anaerolineales	f__Anaerolineaceae	g__T78	s__T78 sp011620445
294_2	GCA_011620465	public genome	1	1	0	0	nothing_new_here	p__Chloroflexota	c__Anaerolineae	o__Anaerolineales	f__Anaerolineaceae	g__T78	s__T78 sp011620465
300_8	GCA_011620505	public genome	1	1	0	0	nothing_new_here	p__Chloroflexota	c__Anaerolineae	o__Anaerolineales	f__Anaerolineaceae	g__T78	s__T78 sp011620505
265_2	GCA_011620545	public genome	1	1	0	0	nothing_new_here	p__Chloroflexota	c__Anaerolineae	o__Anaerolineales	f__Anaerolineaceae	g__Brevefilum	s__
266_2	GCA_011620555	public genome	1	1	0	0	nothing_new_here	p__Chloroflexota	c__Anaerolineae	o__Anaerolineales	f__Anaerolineaceae	g__Brevefilum	s__Brevefilum sp011620555
303_0	GCA_011772455	public genome	1	1	0	0	nothing_new_here	p__Chloroflexota	c__Anaerolineae	o__Anaerolineales	f__E44-bin32	g__	s__
2367_0	GCA_011772595	public genome	1	1	0	0	nothing_new_here	p__Chloroflexota	c__Anaerolineae	o__Anaerolineales	f__E44-bin32	g__	s__
748_2	GCA_011773025	public genome	1	1	0	0	nothing_new_here	p__Chloroflexota	c__Anaerolineae	o__UBA7937	f__B3-Chlor	g__B3-Chlor	s__
1711_3	GCA_011773525	public genome	1	1	0	0	nothing_new_here	p__Chloroflexota	c__Anaerolineae	o__E26-bin7	f__E26-bin7	g__E26-bin7	s__
1409_2	GCA_012026785	public genome	1	1	0	0	nothing_new_here	p__Chloroflexota	c__Ellin6529	o__CSP1-4	f__CSP1-4	g__UBA5189	s__UBA5189 sp012026785
1547_2	GCA_012031225	public genome	1	1	0	0	nothing_new_here	p__Chloroflexota	c__Chloroflexia	o__Chloroflexales	f__Chloroflexaceae	g__JAAUTZ01	s__JAAUTZ01 sp012031225
1613_1	GCA_012031525	public genome	2	2	0	0	nothing_new_here	p__Chloroflexota	c__Chloroflexia	o__Chloroflexales	f__Chloroflexaceae	g__JAAUSQ01	s__JAAUSQ01 sp012033195
1546_0	GCA_012031655	public genome	1	1	0	0	nothing_new_here	p__Chloroflexota	c__Anaerolineae	o__SBR1031	f__J027	g__JAAUUD01	s__JAAUUD01 sp012031655
1541_2	GCA_012032475	public genome	1	1	0	0	nothing_new_here	p__Chloroflexota	c__Chloroflexia	o__Chloroflexales	f__Chloroflexaceae	g__JAAUSY01	s__JAAUSY01 sp012032475
2050_4	GCA_012032575	public genome	1	1	0	0	nothing_new_here	p__Chloroflexota	c__Anaerolineae	o__4572-78	f__J111	g__DSQQ01	s__DSQQ01 sp012032575
1619_0	GCA_012032775	public genome	1	1	0	0	nothing_new_here	p__Chloroflexota	c__Chloroflexia	o__Chloroflexales	f__Chloroflexaceae	g__JAAUQO01	s__JAAUQO01 sp012032775
1809_0	GCA_012032975	public genome	1	1	0	0	nothing_new_here	p__Chloroflexota	c__Anaerolineae	o__Caldilineales	f__Caldilineaceae	g__JAAUPU01	s__JAAUPU01 sp012032975
2153_0	GCA_012033035	public genome	1	1	0	0	nothing_new_here	p__Chloroflexota	c__Anaerolineae	o__Anaerolineales	f__EnvOPS12	g__OLB14	s__
1534_0	GCA_012034075	public genome	1	1	0	0	nothing_new_here	p__Chloroflexota	c__Chloroflexia	o__Chloroflexales	f__Chloroflexaceae	g__JAAURD01	s__JAAURD01 sp012034075
1305_0	GCA_012274105	public genome	1	1	0	0	nothing_new_here	p__Chloroflexota	c__Dehalococcoidia	o__UBA2991	f__UBA2991	g__41671	s__
185_2	GCA_012329075	public genome	1	1	0	0	nothing_new_here	p__Chloroflexota	c__Anaerolineae	o__Promineofilales	f__Promineofilaceae	g__	s__
292_2	GCA_012512535	public genome	1	1	0	0	nothing_new_here	p__Chloroflexota	c__Anaerolineae	o__Anaerolineales	f__Anaerolineaceae	g__T78	s__
294_1	GCA_012512625	public genome	2	1	1	0	old+new_onlyMAGsSRA	p__Chloroflexota	c__Anaerolineae	o__Anaerolineales	f__Anaerolineaceae	g__T78	s__
1972_0	GCA_012513725	public genome	1	1	0	0	nothing_new_here	p__Chloroflexota	c__Anaerolineae	o__UBA1429	f__UBA1429	g__JAAZBY01	s__
666_0	GCA_012514075	public genome	1	1	0	0	nothing_new_here	p__Chloroflexota	c__Dehalococcoidia	o__Dehalococcoidales	f__UBA2162	g__MGML01	s__
1256_0	GCA_012514315	public genome	1	1	0	0	nothing_new_here	p__Chloroflexota	c__Anaerolineae	o__B4-G1	f__B4-G1	g__JAAZAN01	s__JAAZAN01 sp012514315
1883_4	GCA_012514435	public genome	1	1	0	0	nothing_new_here	p__Chloroflexota	c__Anaerolineae	o__SBR1031	f__UBA2029	g__	s__
1754_0	GCA_012514615	public genome	1	1	0	0	nothing_new_here	p__Chloroflexota	c__Anaerolineae	o__DTPP01	f__DTPP01	g__JAAYZY01	s__JAAYZY01 sp012514615
289_0	GCA_012514645	public genome	1	1	0	0	nothing_new_here	p__Chloroflexota	c__Anaerolineae	o__Anaerolineales	f__Anaerolineaceae	g__T78	s__T78 sp012514645
828_1	GCA_012514675	public genome	1	1	0	0	nothing_new_here	p__Chloroflexota	c__Dehalococcoidia	o__Dehalococcoidales	f__CSSed11-197	g__	s__
1258_0	GCA_012514695	public genome	1	1	0	0	nothing_new_here	p__Chloroflexota	c__Anaerolineae	o__B4-G1	f__B4-G1	g__	s__
506_0	GCA_012514715	public genome	1	1	0	0	nothing_new_here	p__Chloroflexota	c__Dehalococcoidia	o__GIF9	f__AB-539-J10	g__	s__
2232_1	GCA_012515195	public genome	2	1	1	0	old+new_onlyMAGsSRA	p__Chloroflexota	c__Anaerolineae	o__Anaerolineales	f__Anaerolineaceae	g__Leptolinea	s__Leptolinea sp012515195
1885_2	GCA_012515245	public genome	1	1	0	0	nothing_new_here	p__Chloroflexota	c__Anaerolineae	o__SBR1031	f__UBA2029	g__TC-15	s__
2312_2	GCA_012515565	public genome	1	1	0	0	nothing_new_here	p__Chloroflexota	c__Anaerolineae	o__UBA1429	f__UBA1429	g__UBA6128	s__
295_1	GCA_012515815	public genome	2	1	1	0	old+new_onlyMAGsSRA	p__Chloroflexota	c__Anaerolineae	o__Anaerolineales	f__Anaerolineaceae	g__T78	s__
307_0	GCA_012516155	public genome	1	1	0	0	nothing_new_here	p__Chloroflexota	c__Anaerolineae	o__Anaerolineales	f__Anaerolineaceae	g__DSYU01	s__
613_0	GCA_012520835	public genome	1	1	0	0	nothing_new_here	p__Chloroflexota	c__Dehalococcoidia	o__Dehalococcoidales	f__UBA5627	g__UBA5627	s__UBA5627 sp012520835
277_0	GCA_012522475	public genome	1	1	0	0	nothing_new_here	p__Chloroflexota	c__Anaerolineae	o__Anaerolineales	f__Anaerolineaceae	g__Brevefilum	s__Brevefilum sp012522475
1665_0	GCA_012689325	public genome	1	1	0	0	nothing_new_here	p__Chloroflexota	c__Anaerolineae	o__JAAYEA01	f__JAAYEA01	g__JAAYEA01	s__JAAYEA01 sp012689325
793_0	GCA_012719135	public genome	1	1	0	0	nothing_new_here	p__Chloroflexota	c__Anaerolineae	o__UBA1429	f__UBA1429	g__JAAYED01	s__JAAYED01 sp012719135
794_0	GCA_012728955	public genome	1	1	0	0	nothing_new_here	p__Chloroflexota	c__Anaerolineae	o__UBA1429	f__UBA1429	g__JAAYED01	s__JAAYED01 sp012728955
459_0	GCA_012729455	public genome	1	1	0	0	nothing_new_here	p__Chloroflexota	c__Anaerolineae	o__UBA1429	f__UBA1429	g__JAAYDC01	s__JAAYDC01 sp012729455
302_0	GCA_012729755	public genome	1	1	0	0	nothing_new_here	p__Chloroflexota	c__Anaerolineae	o__Anaerolineales	f__Anaerolineaceae	g__T78	s__T78 sp012729755
1886_0	GCA_012729765	public genome	1	1	0	0	nothing_new_here	p__Chloroflexota	c__Anaerolineae	o__SBR1031	f__UBA2029	g__JAAYCM01	s__JAAYCM01 sp012729765
1342_0	GCA_012797675	public genome	1	1	0	0	nothing_new_here	p__Chloroflexota	c__Anaerolineae	o__Anaerolineales	f__Anaerolineaceae	g__JAAZNB01	s__
305_1	GCA_012797695	public genome	3	3	0	0	nothing_new_here	p__Chloroflexota	c__Anaerolineae	o__Anaerolineales	f__Anaerolineaceae	g__UBA6107	s__UBA6107 sp012797695
520_2	GCA_012797815	public genome	1	1	0	0	nothing_new_here	p__Chloroflexota	c__Anaerolineae	o__Anaerolineales	f__Anaerolineaceae	g__UBA4781	s__UBA4781 sp012797815
2091_2	GCA_012797895	public genome	1	1	0	0	nothing_new_here	p__Chloroflexota	c__Anaerolineae	o__Anaerolineales	f__Anaerolineaceae	g__Ornatilinea	s__
523_1	GCA_012797975	public genome	3	1	2	0	old+new_onlyMAGsSRA	p__Chloroflexota	c__Anaerolineae	o__Anaerolineales	f__Anaerolineaceae	g__UBA4781	s__UBA4781 sp012797975
2025_0	GCA_012798185	public genome	1	1	0	0	nothing_new_here	p__Chloroflexota	c__Anaerolineae	o__Anaerolineales	f__UBA4823	g__JAAZNS01	s__JAAZNS01 sp012798185
520_1	GCA_012798455	public genome	2	2	0	0	nothing_new_here	p__Chloroflexota	c__Anaerolineae	o__Anaerolineales	f__Anaerolineaceae	g__UBA4781	s__UBA4781 sp012798455
344_4	GCA_012798465	public genome	3	1	2	0	old+new_onlyMAGsSRA	p__Chloroflexota	c__Anaerolineae	o__Anaerolineales	f__Anaerolineaceae	g__Longilinea	s__
2243_0	GCA_012798515	public genome	1	1	0	0	nothing_new_here	p__Chloroflexota	c__Anaerolineae	o__Anaerolineales	f__Anaerolineaceae	g__JAAZNB01	s__JAAZNB01 sp012798515
322_1	GCA_012798535	public genome	2	1	1	0	old+new_onlyMAGsSRA	p__Chloroflexota	c__Anaerolineae	o__Anaerolineales	f__Anaerolineaceae	g__Leptolinea	s__Leptolinea sp012798535
2104_0	GCA_012799995	public genome	1	1	0	0	nothing_new_here	p__Chloroflexota	c__Anaerolineae	o__Anaerolineales	f__Anaerolineaceae	g__Flexilinea	s__Flexilinea sp012799995
286_3	GCA_012800995	public genome	1	1	0	0	nothing_new_here	p__Chloroflexota	c__Anaerolineae	o__Anaerolineales	f__Anaerolineaceae	g__T78	s__T78 sp012800995
286_1	GCA_012839565	public genome	7	5	2	0	mostly_old	p__Chloroflexota	c__Anaerolineae	o__Anaerolineales	f__Anaerolineaceae	g__T78	s__T78 sp012839565
293_1	GCA_012841075	public genome	3	1	2	0	old+new_onlyMAGsSRA	p__Chloroflexota	c__Anaerolineae	o__Anaerolineales	f__Anaerolineaceae	g__T78	s__
1970_0	GCA_012841405	public genome	1	1	0	0	nothing_new_here	p__Chloroflexota	c__Anaerolineae	o__UBA1429	f__UBA1429	g__DUUT01	s__DUUT01 sp012841405
784_0	GCA_012841665	public genome	1	1	0	0	nothing_new_here	p__Chloroflexota	c__Anaerolineae	o__UBA1429	f__UBA1429	g__	s__
1815_2	GCA_012842785	public genome	2	1	1	0	old+new_onlyMAGsSRA	p__Chloroflexota	c__Anaerolineae	o__Caldilineales	f__Caldilineaceae	g__Caldilinea	s__Caldilinea sp002391565
831_1	GCA_012959315	public genome	2	2	0	0	nothing_new_here	p__Chloroflexota	c__Dehalococcoidia	o__UBA1151	f__UBA1151	g__GCA-2730555	s__
833_2	GCA_012959765	public genome	1	1	0	0	nothing_new_here	p__Chloroflexota	c__Dehalococcoidia	o__UBA1151	f__Bin127	g__UBA1328	s__UBA1328 sp012959765
886_3	GCA_012960965	public genome	1	1	0	0	nothing_new_here	p__Chloroflexota	c__Dehalococcoidia	o__UBA2979	f__UBA2979	g__UBA2979	s__
405_0	GCA_012961225	public genome	1	1	0	0	nothing_new_here	p__Chloroflexota	c__Anaerolineae	o__Anaerolineales	f__UBA11858	g__UBA11858	s__
632_0	GCA_012961565	public genome	1	1	0	0	nothing_new_here	p__Chloroflexota	c__Dehalococcoidia	o__GIF9	f__UBA5620	g__DTZC01	s__DTZC01 sp012961565
1721_0	GCA_012961855	public genome	1	1	0	0	nothing_new_here	p__Chloroflexota	c__Anaerolineae	o__	f__	g__	s__
185_1	GCA_012962175	public genome	2	2	0	0	nothing_new_here	p__Chloroflexota	c__Anaerolineae	o__Promineofilales	f__Promineofilaceae	g__	s__
563_1	GCA_012962505	public genome	2	2	0	0	nothing_new_here	p__Chloroflexota	c__Anaerolineae	o__Caldilineales	f__J102	g__M2005	s__M2005 sp011192085
1246_2	GCA_012962755	public genome	1	1	0	0	nothing_new_here	p__Chloroflexota	c__Anaerolineae	o__B4-G1	f__B4-G1	g__B30-G15	s__
1666_0	GCA_012962885	public genome	1	1	0	0	nothing_new_here	p__Chloroflexota	c__Anaerolineae	o__E26-bin7	f__JACIWR01	g__	s__
939_2	GCA_012964735	public genome	1	1	0	0	nothing_new_here	p__Chloroflexota	c__Dehalococcoidia	o__SAR202	f__GCA-002694895	g__GCA-002694895	s__
982_4	GCA_012965485	public genome	1	1	0	0	nothing_new_here	p__Chloroflexota	c__Dehalococcoidia	o__SAR202	f__UBA826	g__UBA11996	s__UBA11996 sp012965485
916_1	GCA_012974295	public genome	1	1	0	0	nothing_new_here	p__Chloroflexota	c__Dehalococcoidia	o__SZUA-161	f__E44-bin15	g__JAAXQM01	s__JAAXQM01 sp012974295
1465_0	GCA_013044295	public genome	1	1	0	0	nothing_new_here	p__Dormibacterota	c__Dormibacteria	o__UBA8260	f__Bog-877	g__AG-12	s__AG-12 sp013044295
1909_0	GCA_013112675	public genome	1	1	0	0	nothing_new_here	p__Chloroflexota	c__Anaerolineae	o__SBR1031	f__A4b	g__OLB13	s__OLB13 sp001567485
2174_3	GCA_013112685	public genome	1	1	0	0	nothing_new_here	p__Chloroflexota	c__Anaerolineae	o__Anaerolineales	f__EnvOPS12	g__OLB14	s__OLB14 sp013112685
406_0	GCA_013122415	public genome	1	1	0	0	nothing_new_here	p__Chloroflexota	c__Chloroflexia	o__Chloroflexales	f__Roseiflexaceae	g__AL-N1	s__AL-N1 sp013122435
203_3	GCA_013139005	public genome	1	1	0	0	nothing_new_here	p__Chloroflexota	c__Anaerolineae	o__Anaerolineales	f__UBA11858	g__B10-G9	s__
916_2	GCA_013139055	public genome	1	1	0	0	nothing_new_here	p__Chloroflexota	c__Dehalococcoidia	o__SZUA-161	f__E44-bin15	g__JAAXQM01	s__
1608_1	GCA_013139935	public genome	2	1	1	0	old+new_onlyMAGsSRA	p__Chloroflexota	c__Anaerolineae	o__Promineofilales	f__UBA4811	g__GLR113	s__GLR113 sp013139935
1242_6	GCA_013139995	public genome	1	1	0	0	nothing_new_here	p__Chloroflexota	c__Anaerolineae	o__Anaerolineales	f__E44-bin32	g__E44-bin32	s__
2200_1	GCA_013140605	public genome	1	1	0	0	nothing_new_here	p__Chloroflexota	c__Anaerolineae	o__Anaerolineales	f__EnvOPS12	g__OLB14	s__OLB14 sp013140605
565_0	GCA_013151415	public genome	1	1	0	0	nothing_new_here	p__Chloroflexota	c__Anaerolineae	o__Caldilineales	f__J102	g__JAADII01	s__JAADII01 sp013151415
166_0	GCA_013151955	public genome	1	1	0	0	nothing_new_here	p__Chloroflexota	c__Anaerolineae	o__Ardenticatenales	f__JAADHH01	g__JAADHH01	s__JAADHH01 sp013151955
2239_0	GCA_013152325	public genome	1	1	0	0	nothing_new_here	p__Chloroflexota	c__Anaerolineae	o__Anaerolineales	f__EnvOPS12	g__NIOZ-UU36	s__NIOZ-UU36 sp013152325
1787_2	GCA_013152435	public genome	1	1	0	0	nothing_new_here	p__Chloroflexota	c__Anaerolineae	o__DUEN01	f__DUEN01	g__DUEN01	s__DUEN01 sp013152435
544_0	GCA_013152585	public genome	1	1	0	0	nothing_new_here	p__Chloroflexota	c__Anaerolineae	o__Caldilineales	f__J102	g__JAADGC01	s__JAADGC01 sp013152585
545_0	GCA_013152695	public genome	1	1	0	0	nothing_new_here	p__Chloroflexota	c__Anaerolineae	o__Caldilineales	f__J102	g__JAADGC01	s__JAADGC01 sp013152695
2279_1	GCA_013153135	public genome	1	1	0	0	nothing_new_here	p__Chloroflexota	c__Anaerolineae	o__Anaerolineales	f__DRMV01	g__JAADEN01	s__JAADEN01 sp013153135
2279_2	GCA_013153335	public genome	1	1	0	0	nothing_new_here	p__Chloroflexota	c__Anaerolineae	o__Anaerolineales	f__DRMV01	g__JAADEN01	s__JAADEN01 sp013153335
2289_1	GCA_013153375	public genome	1	1	0	0	nothing_new_here	p__Chloroflexota	c__Anaerolineae	o__Anaerolineales	f__DRMV01	g__JAADEN01	s__JAADEN01 sp013153375
1750_0	GCA_013154135	public genome	1	1	0	0	nothing_new_here	p__Chloroflexota	c__Anaerolineae	o__Caldilineales	f__JAADDB01	g__JAADDB01	s__JAADDB01 sp013154135
2138_0	GCA_013154225	public genome	1	1	0	0	nothing_new_here	p__Chloroflexota	c__Anaerolineae	o__Anaerolineales	f__DRMV01	g__DRMV01	s__DRMV01 sp013154225
324_0	GCA_013177815	public genome	1	1	0	0	nothing_new_here	p__Chloroflexota	c__Anaerolineae	o__Anaerolineales	f__Anaerolineaceae	g__JABLXM01	s__JABLXM01 sp013177815
412_0	GCA_013178015	public genome	1	1	0	0	nothing_new_here	p__Chloroflexota	c__Anaerolineae	o__DRVO01	f__DRVO01	g__Ch71	s__Ch71 sp013178015
530_1	GCA_013178095	public genome	2	1	1	0	old+new_onlyMAGsSRA	p__Chloroflexota	c__Anaerolineae	o__Anaerolineales	f__Anaerolineaceae	g__Pelolinea	s__Pelolinea sp013178095
568_1	GCA_013178165	public genome	1	1	0	0	nothing_new_here	p__Chloroflexota	c__Anaerolineae	o__SBR1031	f__Ch27	g__Ch27	s__Ch27 sp013178165
337_0	GCA_013178185	public genome	1	1	0	0	nothing_new_here	p__Chloroflexota	c__Anaerolineae	o__Anaerolineales	f__Anaerolineaceae	g__Ch132	s__Ch132 sp013178185
226_0	GCA_013178295	public genome	1	1	0	0	nothing_new_here	p__Chloroflexota	c__Anaerolineae	o__Anaerolineales	f__Anaerolineaceae	g__Ch10	s__Ch10 sp013178295
663_2	GCA_013202615	public genome	1	1	0	0	nothing_new_here	p__Chloroflexota	c__Dehalococcoidia	o__Dehalococcoidales	f__RBG-16-60-22	g__E44-bin89	s__E44-bin89 sp013202615
570_0	GCA_013202625	public genome	1	1	0	0	nothing_new_here	p__Chloroflexota	c__Dehalococcoidia	o__UBA2777	f__RBG-13-53-26	g__PUNJ01	s__
428_0	GCA_013202705	public genome	1	1	0	0	nothing_new_here	p__Chloroflexota	c__Anaerolineae	o__Anaerolineales	f__UBA11858	g__B10-G9	s__
881_0	GCA_013203045	public genome	1	1	0	0	nothing_new_here	p__Chloroflexota	c__Dehalococcoidia	o__SZUA-161	f__SpSt-899	g__JABMQN01	s__JABMQN01 sp013203045
839_0	GCA_013203305	public genome	1	1	0	0	nothing_new_here	p__Chloroflexota	c__Dehalococcoidia	o__UBA1151	f__SHXW01	g__	s__
836_0	GCA_013204545	public genome	1	1	0	0	nothing_new_here	p__Chloroflexota	c__Dehalococcoidia	o__UBA1151	f__Bin127	g__UBA1328	s__UBA1328 sp013204545
1664_0	GCA_013204555	public genome	1	1	0	0	nothing_new_here	p__Chloroflexota	c__Dehalococcoidia	o__UBA1151	f__UBA1151	g__UBA1151	s__UBA1151 sp013204555
1104_0	GCA_013204585	public genome	1	1	0	0	nothing_new_here	p__Chloroflexota	c__Dehalococcoidia	o__UBA3495	f__UBA3495	g__UBA9611	s__UBA9611 sp013204585
80_5	GCA_013205165	public genome	1	1	0	0	nothing_new_here	p__Chloroflexota	c__Ellin6529	o__CSP1-4	f__UBA10416	g__UBA10416	s__
1595_0	GCA_013314735	public genome	1	1	0	0	nothing_new_here	p__Chloroflexota	c__Anaerolineae	o__Anaerolineales	f__Anaerolineaceae	g__SpSt-1165	s__SpSt-1165 sp013314735
374_0	GCA_013334685	public genome	1	1	0	0	nothing_new_here	p__Chloroflexota	c__Anaerolineae	o__Anaerolineales	f__Anaerolineaceae	g__UBA6170	s__
2080_2	GCA_013334875	public genome	1	1	0	0	nothing_new_here	p__Chloroflexota	c__Anaerolineae	o__Thermoflexales	f__Fen-1058	g__Fen-1058	s__
2169_0	GCA_013335365	public genome	1	1	0	0	nothing_new_here	p__Chloroflexota	c__Anaerolineae	o__Anaerolineales	f__EnvOPS12	g__UBA12294	s__
1590_0	GCA_013335625	public genome	1	1	0	0	nothing_new_here	p__Chloroflexota	c__Chloroflexia	o__Chloroflexales	f__Chloroflexaceae	g__Oscillochloris	s__
348_0	GCA_013335895	public genome	1	1	0	0	nothing_new_here	p__Chloroflexota	c__Anaerolineae	o__Anaerolineales	f__Anaerolineaceae	g__UBA4081	s__
1586_0	GCA_013336035	public genome	1	1	0	0	nothing_new_here	p__Chloroflexota	c__Chloroflexia	o__Chloroflexales	f__Chloroflexaceae	g__CAIWXH01	s__
1591_0	GCA_013336555	public genome	1	1	0	0	nothing_new_here	p__Chloroflexota	c__Chloroflexia	o__Chloroflexales	f__Chloroflexaceae	g__Oscillochloris	s__
2128_0	GCA_013359445	public genome	1	1	0	0	nothing_new_here	p__Chloroflexota	c__Anaerolineae	o__Anaerolineales	f__JABWBV01	g__JABWBV01	s__JABWBV01 sp013359445
1922_1	GCA_013360465	public genome	1	1	0	0	nothing_new_here	p__Chloroflexota	c__Anaerolineae	o__SBR1031	f__A4b	g__OLB15	s__OLB15 sp013360465
564_0	GCA_013360575	public genome	1	1	0	0	nothing_new_here	p__Chloroflexota	c__Anaerolineae	o__Caldilineales	f__J102	g__JABWBG01	s__JABWBG01 sp013360575
2170_1	GCA_013360875	public genome	2	1	1	0	old+new_onlyMAGsSRA	p__Chloroflexota	c__Anaerolineae	o__Anaerolineales	f__EnvOPS12	g__UBA12294	s__UBA12294 sp013360875
1923_1	GCA_013388745	public genome	2	1	1	0	old+new_onlyMAGsSRA	p__Chloroflexota	c__Anaerolineae	o__SBR1031	f__A4b	g__JACAER01	s__JACAER01 sp013388745
1570_1	GCA_013388755	public genome	2	1	1	0	old+new_onlyMAGsSRA	p__Chloroflexota	c__Chloroflexia	o__Chloroflexales	f__Roseiflexaceae	g__JACAEQ01	s__JACAEQ01 sp013388755
2186_3	GCA_013388795	public genome	2	1	1	0	old+new_onlyMAGsSRA	p__Chloroflexota	c__Anaerolineae	o__Anaerolineales	f__EnvOPS12	g__OLB14	s__OLB14 sp013388795
785_0	GCA_013390565	public genome	1	1	0	0	nothing_new_here	p__Chloroflexota	c__Chloroflexia	o__54-19	f__54-19	g__L227-S17	s__L227-S17 sp013390565
2366_0	GCA_013390945	public genome	1	1	0	0	nothing_new_here	p__Chloroflexota	c__Chloroflexia	o__54-19	f__54-19	g__L227-5C	s__L227-5C sp013390945
1482_0	GCA_013538855	public genome	1	1	0	0	nothing_new_here	p__Chloroflexota	c__Chloroflexia	o__Chloroflexales	f__Herpetosiphonaceae	g__OHK22	s__OHK22 sp013538855
1800_0	GCA_013693795	public genome	1	1	0	0	nothing_new_here	p__Chloroflexota	c__Anaerolineae	o__CG2-30-64-16	f__SSC4	g__SSC4	s__SSC4 sp013693795
1398_0	GCA_013694505	public genome	1	1	0	0	nothing_new_here	p__Chloroflexota	c__Ellin6529	o__CSP1-4	f__CSP1-4	g__SPCO01	s__
1525_1	GCA_013694535	public genome	1	1	0	0	nothing_new_here	p__Chloroflexota	c__Chloroflexia	o__Thermomicrobiales	f__UBA6265	g__CADCWJ01	s__
1346_2	GCA_013694645	public genome	1	1	0	0	nothing_new_here	p__Chloroflexota	c__Ellin6529	o__QHBO01	f__QHBO01	g__JACDBZ01	s__JACDBZ01 sp013694645
1346_1	GCA_013694795	public genome	2	2	0	0	nothing_new_here	p__Chloroflexota	c__Ellin6529	o__QHBO01	f__QHBO01	g__JACDBZ01	s__JACDBZ01 sp013694795
1356_0	GCA_013694835	public genome	1	1	0	0	nothing_new_here	p__Chloroflexota	c__Ellin6529	o__CSP1-4	f__CSP1-4	g__JACDBP01	s__JACDBP01 sp013694835
1518_1	GCA_013694885	public genome	1	1	0	0	nothing_new_here	p__Chloroflexota	c__Chloroflexia	o__Thermomicrobiales	f__UBA6265	g__JACDBO01	s__JACDBO01 sp013694885
70_0	GCA_013694935	public genome	1	1	0	0	nothing_new_here	p__Chloroflexota	c__Ktedonobacteria	o__Ktedonobacterales	f__Ktedonobacteraceae	g__	s__
1354_0	GCA_013694985	public genome	1	1	0	0	nothing_new_here	p__Chloroflexota	c__Ellin6529	o__CSP1-4	f__CSP1-4	g__Palsa-1032	s__
1517_1	GCA_013695045	public genome	1	1	0	0	nothing_new_here	p__Chloroflexota	c__Chloroflexia	o__Thermomicrobiales	f__UBA6265	g__JACCVC01	s__
1357_1	GCA_013695255	public genome	1	1	0	0	nothing_new_here	p__Chloroflexota	c__Ellin6529	o__CSP1-4	f__CSP1-4	g__JACDAV01	s__JACDAV01 sp013695255
1549_1	GCA_013695265	public genome	1	1	0	0	nothing_new_here	p__Chloroflexota	c__Chloroflexia	o__Thermobaculales	f__Thermobaculaceae	g__JACDAU01	s__JACDAU01 sp013695265
1411_1	GCA_013695505	public genome	1	1	0	0	nothing_new_here	p__Chloroflexota	c__Ellin6529	o__CSP1-4	f__CSP1-4	g__CF-46	s__CF-46 sp013695505
1388_0	GCA_013695535	public genome	1	1	0	0	nothing_new_here	p__Chloroflexota	c__Ellin6529	o__CSP1-4	f__CSP1-4	g__	s__
1334_0	GCA_013695575	public genome	1	1	0	0	nothing_new_here	p__Chloroflexota	c__Ellin6529	o__P2-11E	f__P2-11E	g__JACDAF01	s__JACDAF01 sp013695575
42_0	GCA_013695595	public genome	1	1	0	0	nothing_new_here	p__Chloroflexota	c__Ktedonobacteria	o__Ktedonobacterales	f__Ktedonobacteraceae	g__JACDAE01	s__JACDAE01 sp013695595
1222_0	GCA_013695975	public genome	1	1	0	0	nothing_new_here	p__Chloroflexota	c__UBA6077	o__UBA6077	f__CF-72	g__	s__
1475_0	GCA_013696045	public genome	1	1	0	0	nothing_new_here	p__Chloroflexota	c__Chloroflexia	o__Thermomicrobiales	f__CFX8	g__JACCZH01	s__JACCZH01 sp013696045
818_1	GCA_013696265	public genome	1	1	0	0	nothing_new_here	p__Chloroflexota	c__Chloroflexia	o__Thermomicrobiales	f__UBA6265	g__JACCYX01	s__JACCYX01 sp013696265
1370_0	GCA_013696275	public genome	1	1	0	0	nothing_new_here	p__Chloroflexota	c__Ellin6529	o__CSP1-4	f__CSP1-4	g__Palsa-1032	s__Palsa-1032 sp013696275
1512_0	GCA_013696525	public genome	1	1	0	0	nothing_new_here	p__Chloroflexota	c__Chloroflexia	o__Thermomicrobiales	f__UBA6265	g__JACCYK01	s__JACCYK01 sp013696525
1369_0	GCA_013696755	public genome	1	1	0	0	nothing_new_here	p__Chloroflexota	c__Ellin6529	o__CSP1-4	f__CSP1-4	g__	s__
1358_0	GCA_013696945	public genome	1	1	0	0	nothing_new_here	p__Chloroflexota	c__Ellin6529	o__CSP1-4	f__CSP1-4	g__Palsa-1032	s__Palsa-1032 sp013696945
1520_0	GCA_013697005	public genome	1	1	0	0	nothing_new_here	p__Chloroflexota	c__Chloroflexia	o__Thermomicrobiales	f__UBA6265	g__JACCXM01	s__JACCXM01 sp013697005
1352_0	GCA_013697395	public genome	1	1	0	0	nothing_new_here	p__Chloroflexota	c__Ellin6529	o__QHBO01	f__QHBO01	g__JACDBZ01	s__JACDBZ01 sp013697395
51_1	GCA_013697605	public genome	1	1	0	0	nothing_new_here	p__Chloroflexota	c__Ktedonobacteria	o__Ktedonobacterales	f__Ktedonobacteraceae	g__Dictyobacter	s__
1399_0	GCA_013697965	public genome	1	1	0	0	nothing_new_here	p__Chloroflexota	c__Ellin6529	o__CSP1-4	f__CSP1-4	g__SPCO01	s__
1411_2	GCA_013698095	public genome	1	1	0	0	nothing_new_here	p__Chloroflexota	c__Ellin6529	o__CSP1-4	f__CSP1-4	g__CF-46	s__CF-46 sp013698095
1567_1	GCA_013698285	public genome	1	1	0	0	nothing_new_here	p__Chloroflexota	c__Chloroflexia	o__Thermomicrobiales	f__UBA6265	g__JACCVE01	s__JACCVE01 sp013698285
1517_2	GCA_013698305	public genome	1	1	0	0	nothing_new_here	p__Chloroflexota	c__Chloroflexia	o__Thermomicrobiales	f__UBA6265	g__JACCVC01	s__JACCVC01 sp013698305
1486_2	GCA_013698385	public genome	1	1	0	0	nothing_new_here	p__Chloroflexota	c__Ellin6529	o__CSP1-4	f__CSP1-4	g__SPCO01	s__SPCO01 sp013698385
1489_0	GCA_013698495	public genome	1	1	0	0	nothing_new_here	p__Chloroflexota	c__Chloroflexia	o__Thermomicrobiales	f__UBA6265	g__JACCYX01	s__JACCYX01 sp013698495
356_1	GCA_013791645	public genome	2	2	0	0	nothing_new_here	p__Chloroflexota	c__Anaerolineae	o__Anaerolineales	f__Anaerolineaceae	g__UBA6107	s__
1523_1	GCA_013812125	public genome	1	1	0	0	nothing_new_here	p__Chloroflexota	c__Chloroflexia	o__Thermomicrobiales	f__UBA6265	g__CADCWF01	s__
819_0	GCA_013812525	public genome	1	1	0	0	nothing_new_here	p__Chloroflexota	c__Chloroflexia	o__Thermomicrobiales	f__UBA6265	g__JACCYX01	s__
1743_0	GCA_013812995	public genome	1	1	0	0	nothing_new_here	p__Chloroflexota	c__Anaerolineae	o__Ardenticatenales	f__Ardenticatenaceae	g__	s__
818_2	GCA_013813065	public genome	1	1	0	0	nothing_new_here	p__Chloroflexota	c__Chloroflexia	o__Thermomicrobiales	f__UBA6265	g__JACCYX01	s__
1400_0	GCA_013813385	public genome	1	1	0	0	nothing_new_here	p__Chloroflexota	c__Ellin6529	o__CSP1-4	f__CSP1-4	g__SPCO01	s__
1521_0	GCA_013813485	public genome	1	1	0	0	nothing_new_here	p__Chloroflexota	c__Chloroflexia	o__Thermomicrobiales	f__UBA6265	g__JACCXM01	s__
1481_2	GCA_013813565	public genome	1	1	0	0	nothing_new_here	p__Chloroflexota	c__Chloroflexia	o__Chloroflexales	f__Herpetosiphonaceae	g__JACCRK01	s__JACCRK01 sp013813565
2349_0	GCA_013813705	public genome	1	1	0	0	nothing_new_here	p__Chloroflexota	c__Chloroflexia	o__Thermomicrobiales	f__UBA6265	g__	s__
1353_1	GCA_013813905	public genome	2	2	0	0	nothing_new_here	p__Chloroflexota	c__Ellin6529	o__CSP1-4	f__CSP1-4	g__Palsa-1032	s__Palsa-1032 sp013813905
51_2	GCA_013815535	public genome	1	1	0	0	nothing_new_here	p__Chloroflexota	c__Ktedonobacteria	o__Ktedonobacterales	f__JACDGC01	g__JACDGC01	s__JACDGC01 sp013815535
1357_2	GCA_013815585	public genome	1	1	0	0	nothing_new_here	p__Chloroflexota	c__Ellin6529	o__CSP1-4	f__CSP1-4	g__JACDFU01	s__JACDFU01 sp013815585
1344_0	GCA_013816405	public genome	1	1	0	0	nothing_new_here	p__Chloroflexota	c__Ellin6529	o__QHBO01	f__QHBO01	g__CF-167	s__CF-167 sp013816405
1353_2	GCA_013816885	public genome	4	4	0	0	nothing_new_here	p__Chloroflexota	c__Ellin6529	o__CSP1-4	f__CSP1-4	g__Palsa-1032	s__
1518_2	GCA_013816925	public genome	1	1	0	0	nothing_new_here	p__Chloroflexota	c__Chloroflexia	o__Thermomicrobiales	f__UBA6265	g__CADCWL01	s__
1346_3	GCA_013817355	public genome	1	1	0	0	nothing_new_here	p__Chloroflexota	c__Ellin6529	o__QHBO01	f__QHBO01	g__JACDBZ01	s__
1347_2	GCA_013820865	public genome	1	1	0	0	nothing_new_here	p__Chloroflexota	c__Ellin6529	o__QHBO01	f__QHBO01	g__JACDBZ01	s__JACDBZ01 sp013820865
820_0	GCA_013821605	public genome	1	1	0	0	nothing_new_here	p__Chloroflexota	c__Chloroflexia	o__Chloroflexales	f__Herpetosiphonaceae	g__JACDGP01	s__JACDGP01 sp013821605
2519_0	GCA_013821665	public genome	1	1	0	0	nothing_new_here	p__Chloroflexota	c__Anaerolineae	o__SBR1031	f__A4b	g__CFX2	s__
1297_0	GCA_013822275	public genome	1	1	0	0	nothing_new_here	p__Chloroflexota	c__Dehalococcoidia	o__UBA2991	f__UBA2991	g__PNKC01	s__PNKC01 sp013822275
1405_6	GCA_013822395	public genome	1	1	0	0	nothing_new_here	p__Chloroflexota	c__Ellin6529	o__CSP1-4	f__CSP1-4	g__UBA5189	s__UBA5189 sp013822395
356_4	GCA_013824385	public genome	1	1	0	0	nothing_new_here	p__Chloroflexota	c__Anaerolineae	o__Anaerolineales	f__Anaerolineaceae	g__UBA6107	s__UBA6107 sp013824385
361_1	GCA_013824745	public genome	3	2	1	0	old+new_onlyMAGsSRA	p__Chloroflexota	c__Anaerolineae	o__Anaerolineales	f__Anaerolineaceae	g__Bellilinea	s__Bellilinea sp004347695
2237_3	GCA_013824805	public genome	1	1	0	0	nothing_new_here	p__Chloroflexota	c__Anaerolineae	o__Anaerolineales	f__EnvOPS12	g__CG2-30-58-95	s__
1705_0	GCA_013824865	public genome	1	1	0	0	nothing_new_here	p__Chloroflexota	c__Anaerolineae	o__Anaerolineales	f__Anaerolineaceae	g__PNON01	s__PNON01 sp013824865
2555_0	GCA_013911545	public genome	1	1	0	0	nothing_new_here	p__Chloroflexota	c__Dehalococcoidia	o__UBA1151	f__TMED-70	g__GCA-002700125	s__GCA-002700125 sp013911545
299_1	GCA_014155645	public genome	1	1	0	0	nothing_new_here	p__Chloroflexota	c__Anaerolineae	o__Anaerolineales	f__Anaerolineaceae	g__T78	s__
2330_1	GCA_014155665	public genome	2	2	0	0	nothing_new_here	p__Chloroflexota	c__Anaerolineae	o__Caldilineales	f__Caldilineaceae	g__CFX5	s__
439_0	GCA_014155685	public genome	1	1	0	0	nothing_new_here	p__Chloroflexota	c__Anaerolineae	o__B4-G1	f__SLSP01	g__PWVB01	s__
1798_4	GCA_014155705	public genome	1	1	0	0	nothing_new_here	p__Chloroflexota	c__Anaerolineae	o__Caldilineales	f__JAAEKA01	g__JAAEKA01	s__JAAEKA01 sp014155705
1213_0	GCA_014237525	public genome	1	1	0	0	nothing_new_here	p__Chloroflexota	c__Chloroflexia	o__Thermomicrobiales	f__UBA6265	g__UBA6265	s__
264_3	GCA_014237535	public genome	2	1	1	0	old+new_onlyMAGsSRA	p__Chloroflexota	c__Anaerolineae	o__Anaerolineales	f__Anaerolineaceae	g__49-20	s__
1977_2	GCA_014237545	public genome	1	1	0	0	nothing_new_here	p__Chloroflexota	c__Anaerolineae	o__Promineofilales	f__Promineofilaceae	g__Promineofilum	s__Promineofilum sp014237545
2552_4	GCA_014239735	public genome	1	1	0	0	nothing_new_here	p__Chloroflexota	c__Dehalococcoidia	o__UBA1151	f__TMED-70	g__GCA-002700125	s__GCA-002700125 sp014239735
786_1	GCA_014360715	public genome	1	1	0	0	nothing_new_here	p__Chloroflexota	c__Anaerolineae	o__UBA1429	f__UBA1429	g__	s__
792_0	GCA_014360745	public genome	1	1	0	0	nothing_new_here	p__Chloroflexota	c__Anaerolineae	o__UBA1429	f__UBA1429	g__SKLG01	s__
401_0	GCA_014360755	public genome	1	1	0	0	nothing_new_here	p__Chloroflexota	c__Anaerolineae	o__UBA2200	f__UBA2200	g__JACIWX01	s__JACIWX01 sp014360755
786_2	GCA_014360785	public genome	1	1	0	0	nothing_new_here	p__Chloroflexota	c__Anaerolineae	o__UBA1429	f__UBA1429	g__	s__
1731_2	GCA_014360805	public genome	1	1	0	0	nothing_new_here	p__Chloroflexota	c__Anaerolineae	o__DTPP01	f__DTLA01	g__DTLA01	s__DTLA01 sp014360805
1607_0	GCA_014360825	public genome	1	1	0	0	nothing_new_here	p__Chloroflexota	c__Anaerolineae	o__UBA2200	f__JACIWT01	g__JACIWT01	s__JACIWT01 sp014360825
2230_3	GCA_014360845	public genome	1	1	0	0	nothing_new_here	p__Chloroflexota	c__Anaerolineae	o__E26-bin7	f__JACIWR01	g__JACIWR01	s__JACIWR01 sp014360845
1687_1	GCA_014360855	public genome	3	2	1	0	old+new_onlyMAGsSRA	p__Chloroflexota	c__Anaerolineae	o__DTPP01	f__JACIWP01	g__JACIWP01	s__JACIWP01 sp014360855
402_0	GCA_014360885	public genome	1	1	0	0	nothing_new_here	p__Chloroflexota	c__Anaerolineae	o__UBA2200	f__UBA2200	g__JACIWX01	s__
1736_15	GCA_014360895	public genome	1	1	0	0	nothing_new_here	p__Chloroflexota	c__Anaerolineae	o__B4-G1	f__DUEL01	g__SpSt-77	s__SpSt-77 sp014360895
404_0	GCA_014360905	public genome	1	1	0	0	nothing_new_here	p__Chloroflexota	c__Anaerolineae	o__UBA2200	f__UBA2200	g__JACIWX01	s__JACIWX01 sp014360905
1753_3	GCA_014360965	public genome	1	1	0	0	nothing_new_here	p__Chloroflexota	c__Anaerolineae	o__DTPP01	f__DTPP01	g__DTPP01	s__
1545_1	GCA_014379235	public genome	2	2	0	0	nothing_new_here	p__Chloroflexota	c__Anaerolineae	o__SBR1031	f__A4b	g__	s__
1980_2	GCA_014379495	public genome	1	1	0	0	nothing_new_here	p__Chloroflexota	c__Anaerolineae	o__SBR1031	f__A4b	g__	s__
2209_0	GCA_014379595	public genome	1	1	0	0	nothing_new_here	p__Chloroflexota	c__Anaerolineae	o__Anaerolineales	f__EnvOPS12	g__OLB14	s__OLB14 sp014379595
1559_0	GCA_014380685	public genome	1	1	0	0	nothing_new_here	p__Chloroflexota	c__Chloroflexia	o__Chloroflexales	f__	g__	s__
1561_0	GCA_014380805	public genome	1	1	0	0	nothing_new_here	p__Chloroflexota	c__Anaerolineae	o__SBR1031	f__A4b	g__OLB13	s__
478_0	GCA_014381165	public genome	1	1	0	0	nothing_new_here	p__Chloroflexota	c__Chloroflexia	o__Chloroflexales	f__Roseiflexaceae	g__JACMIM01	s__JACMIM01 sp014381165
2344_0	GCA_014381185	public genome	1	1	0	0	nothing_new_here	p__Chloroflexota	c__Anaerolineae	o__SBR1031	f__A4b	g__OLB13	s__
1723_7	GCA_014381335	public genome	1	1	0	0	nothing_new_here	p__Chloroflexota	c__Anaerolineae	o__E26-bin7	f__JACIWR01	g__	s__
1098_2	GCA_014382185	public genome	1	1	0	0	nothing_new_here	p__Chloroflexota	c__Dehalococcoidia	o__UBA3495	f__UBA3495	g__UBA9611	s__
1840_1	GCA_014382415	public genome	1	1	0	0	nothing_new_here	p__Chloroflexota	c__Anaerolineae	o__4572-78	f__NAK82	g__	s__
212_1	GCA_014382535	public genome	2	2	0	0	nothing_new_here	p__Chloroflexota	c__Anaerolineae	o__Anaerolineales	f__EnvOPS12	g__NIOZ-UU36	s__NIOZ-UU36 sp014382535
2083_2	GCA_014382605	public genome	2	2	0	0	nothing_new_here	p__Chloroflexota	c__Anaerolineae	o__Anaerolineales	f__UBA11858	g__NIOZ-UU35	s__NIOZ-UU35 sp014382605
1724_1	GCA_014383605	public genome	2	1	1	0	old+new_onlyMAGsSRA	p__Chloroflexota	c__Anaerolineae	o__UBA3071	f__UBA3071	g__NIOZ-UU15	s__NIOZ-UU15 sp014383605
679_1	GCA_014384515	public genome	1	1	0	0	nothing_new_here	p__Chloroflexota	c__Dehalococcoidia	o__GIF9	f__UBA5620	g__JACNFS01	s__JACNFS01 sp014384515
2163_1	GCA_014584545	public genome	1	1	0	0	nothing_new_here	p__Chloroflexota	c__Anaerolineae	o__Anaerolineales	f__EnvOPS12	g__UBA12294	s__UBA12294 sp002050275
1973_3	GCA_014584575	public genome	1	1	0	0	nothing_new_here	p__Chloroflexota	c__Anaerolineae	o__Promineofilales	f__Promineofilaceae	g__CAADGU01	s__CAADGU01 sp014584575
1111_1	GCA_014672715	public genome	1	1	0	0	nothing_new_here	p__Chloroflexota	c__Dehalococcoidia	o__Dehalococcoidales	f__Dehalococcoidaceae	g__Dehalogenimonas	s__Dehalogenimonas sp002878295
313_0	GCA_014859065	public genome	1	1	0	0	nothing_new_here	p__Chloroflexota	c__Anaerolineae	o__Anaerolineales	f__UBA4823	g__	s__
924_4	GCA_014859165	public genome	1	1	0	0	nothing_new_here	p__Chloroflexota	c__Dehalococcoidia	o__SZUA-161	f__E44-bin15	g__	s__
700_0	GCA_014859205	public genome	1	1	0	0	nothing_new_here	p__Chloroflexota	c__Dehalococcoidia	o__GIF9	f__AB-539-J10	g__E29-bin73	s__
962_0	GCA_014859215	public genome	1	1	0	0	nothing_new_here	p__Chloroflexota	c__Dehalococcoidia	o__SZUA-161	f__SZUA-161	g__	s__
1299_2	GCA_014860315	public genome	1	1	0	0	nothing_new_here	p__Chloroflexota	c__Dehalococcoidia	o__UBA2991	f__UBA2991	g__41671	s__
2165_3	GCA_014860745	public genome	1	1	0	0	nothing_new_here	p__Chloroflexota	c__Anaerolineae	o__Anaerolineales	f__EnvOPS12	g__OLB14	s__
1991_2	GCA_014860775	public genome	1	1	0	0	nothing_new_here	p__Chloroflexota	c__Anaerolineae	o__SBR1031	f__A4b	g__OLB15	s__
2193_1	GCA_014860805	public genome	1	1	0	0	nothing_new_here	p__Chloroflexota	c__Anaerolineae	o__Anaerolineales	f__EnvOPS12	g__OLB14	s__
274_0	GCA_014860825	public genome	1	1	0	0	nothing_new_here	p__Chloroflexota	c__Anaerolineae	o__Anaerolineales	f__Anaerolineaceae	g__DSYU01	s__
342_6	GCA_014860845	public genome	1	1	0	0	nothing_new_here	p__Chloroflexota	c__Anaerolineae	o__Anaerolineales	f__Anaerolineaceae	g__UBA6170	s__
912_1	GCA_014874385	public genome	1	1	0	0	nothing_new_here	p__Chloroflexota	c__Dehalococcoidia	o__SZUA-161	f__SZUA-161	g__	s__
1503_4	GCA_014874455	public genome	1	1	0	0	nothing_new_here	p__Chloroflexota	c__Chloroflexia	o__Thermomicrobiales	f__Thermomicrobiaceae	g__HRBIN26	s__
1736_4	GCA_014874475	public genome	1	1	0	0	nothing_new_here	p__Chloroflexota	c__Anaerolineae	o__B4-G1	f__DUEL01	g__SpSt-77	s__
1731_5	GCA_014874485	public genome	1	1	0	0	nothing_new_here	p__Chloroflexota	c__Anaerolineae	o__DTPP01	f__DTLA01	g__DTLA01	s__
175_0	GCA_014879345	public genome	1	1	0	0	nothing_new_here	p__Chloroflexota	c__Anaerolineae	o__Promineofilales	f__Promineofilaceae	g__GCA-2746795	s__
558_2	GCA_014879665	public genome	1	1	0	0	nothing_new_here	p__Chloroflexota	c__Anaerolineae	o__SBR1031	f__A4b	g__OLB15	s__
1798_2	GCA_014879765	public genome	1	1	0	0	nothing_new_here	p__Chloroflexota	c__Anaerolineae	o__Caldilineales	f__JAAEKA01	g__JAAEKA01	s__
1814_1	GCA_014879855	public genome	1	1	0	0	nothing_new_here	p__Chloroflexota	c__Anaerolineae	o__Caldilineales	f__Caldilineaceae	g__Caldilinea	s__
1868_0	GCA_014879865	public genome	1	1	0	0	nothing_new_here	p__Chloroflexota	c__Anaerolineae	o__SBR1031	f__A4b	g__OLB15	s__
1951_0	GCA_014879875	public genome	1	1	0	0	nothing_new_here	p__Chloroflexota	c__Anaerolineae	o__Promineofilales	f__Promineofilaceae	g__	s__
2052_1	GCA_015075185	public genome	1	1	0	0	nothing_new_here	p__Chloroflexota	c__Anaerolineae	o__4572-78	f__J111	g__DSQQ01	s__
2163_2	GCA_015075275	public genome	1	1	0	0	nothing_new_here	p__Chloroflexota	c__Anaerolineae	o__Anaerolineales	f__EnvOPS12	g__UBA12294	s__
2050_2	GCA_015075405	public genome	1	1	0	0	nothing_new_here	p__Chloroflexota	c__Anaerolineae	o__4572-78	f__J111	g__DSQQ01	s__
1307_2	GCA_015075555	public genome	1	1	0	0	nothing_new_here	p__Chloroflexota	c__Dehalococcoidia	o__UBA2991	f__UBA2991	g__UCB2	s__
2187_1	GCA_015075725	public genome	2	2	0	0	nothing_new_here	p__Chloroflexota	c__Anaerolineae	o__Anaerolineales	f__EnvOPS12	g__OLB14	s__OLB14 sp008363285
1973_1	GCA_015075765	public genome	1	1	0	0	nothing_new_here	p__Chloroflexota	c__Anaerolineae	o__Promineofilales	f__Promineofilaceae	g__CAADGU01	s__CAADGU01 sp013112725
40_0	GCA_015099395	public genome	1	1	0	0	nothing_new_here	p__Chloroflexota	c__Ktedonobacteria	o__Ktedonobacterales	f__Ktedonobacteraceae	g__Dictyobacter	s__
1247_6	GCA_015222155	public genome	1	1	0	0	nothing_new_here	p__Chloroflexota	c__Anaerolineae	o__B4-G1	f__B4-G1	g__B30-G15	s__
190_0	GCA_015222185	public genome	1	1	0	0	nothing_new_here	p__Chloroflexota	c__Anaerolineae	o__Anaerolineales	f__UBA11858	g__	s__
708_0	GCA_015222205	public genome	1	1	0	0	nothing_new_here	p__Chloroflexota	c__Dehalococcoidia	o__Dehalococcoidales	f__UBA5760	g__UBA5760	s__
690_1	GCA_015222255	public genome	3	1	2	0	old+new_onlyMAGsSRA	p__Chloroflexota	c__Dehalococcoidia	o__GIF9	f__AB-539-J10	g__	s__
1242_4	GCA_015222305	public genome	1	1	0	0	nothing_new_here	p__Chloroflexota	c__Anaerolineae	o__Anaerolineales	f__E44-bin32	g__E44-bin32	s__
759_2	GCA_015222315	public genome	1	1	0	0	nothing_new_here	p__Chloroflexota	c__Dehalococcoidia	o__Dehalococcoidales	f__UBA5760	g__UBA5760	s__
500_2	GCA_015222365	public genome	1	1	0	0	nothing_new_here	p__Chloroflexota	c__Dehalococcoidia	o__GIF9	f__AB-539-J10	g__	s__
188_1	GCA_015222395	public genome	1	1	0	0	nothing_new_here	p__Chloroflexota	c__Anaerolineae	o__Anaerolineales	f__UBA4823	g__DSPF01	s__
1248_0	GCA_015222415	public genome	1	1	0	0	nothing_new_here	p__Chloroflexota	c__Anaerolineae	o__B4-G1	f__B4-G1	g__	s__
635_3	GCA_015222445	public genome	1	1	0	0	nothing_new_here	p__Chloroflexota	c__Dehalococcoidia	o__Dehalococcoidales	f__UBA5760	g__W498	s__
1199_0	GCA_015478575	public genome	1	1	0	0	nothing_new_here	p__Chloroflexota	c__Ktedonobacteria	o__Ktedonobacterales	f__	g__	s__
1266_0	GCA_015478665	public genome	1	1	0	0	nothing_new_here	p__Chloroflexota	c__Dehalococcoidia	o__DSTF01	f__	g__	s__
1473_0	GCA_015478675	public genome	1	1	0	0	nothing_new_here	p__Chloroflexota	c__Chloroflexia	o__54-19	f__	g__	s__
1403_0	GCA_015478725	public genome	1	1	0	0	nothing_new_here	p__Chloroflexota	c__Ellin6529	o__CSP1-4	f__CSP1-4	g__C-114	s__
2325_0	GCA_015484665	public genome	1	1	0	0	nothing_new_here	p__Chloroflexota	c__Anaerolineae	o__	f__	g__	s__
1999_2	GCA_015484715	public genome	2	2	0	0	nothing_new_here	p__Chloroflexota	c__Anaerolineae	o__B4-G1	f__	g__	s__
1055_2	GCA_015484985	public genome	1	1	0	0	nothing_new_here	p__Chloroflexota	c__Anaerolineae	o__Anaerolineales	f__DRMV01	g__	s__
2086_0	GCA_015484995	public genome	1	1	0	0	nothing_new_here	p__Chloroflexota	c__Anaerolineae	o__Anaerolineales	f__E44-bin32	g__	s__
1776_0	GCA_015485245	public genome	1	1	0	0	nothing_new_here	p__Chloroflexota	c__Anaerolineae	o__Anaerolineales	f__UBA11858	g__J130	s__
546_0	GCA_015485435	public genome	1	1	0	0	nothing_new_here	p__Chloroflexota	c__Anaerolineae	o__Caldilineales	f__J102	g__M2005	s__
179_0	GCA_015486215	public genome	1	1	0	0	nothing_new_here	p__Chloroflexota	c__Anaerolineae	o__Promineofilales	f__Promineofilaceae	g__GCA-2746795	s__
253_1	GCA_015486235	public genome	2	2	0	0	nothing_new_here	p__Chloroflexota	c__Anaerolineae	o__Caldilineales	f__	g__	s__
1779_0	GCA_015486785	public genome	1	1	0	0	nothing_new_here	p__Chloroflexota	c__Anaerolineae	o__B4-G1	f__SLSP01	g__JAAAOZ01	s__
255_0	GCA_015486845	public genome	1	1	0	0	nothing_new_here	p__Chloroflexota	c__Anaerolineae	o__Caldilineales	f__JAADDB01	g__	s__
254_0	GCA_015486895	public genome	1	1	0	0	nothing_new_here	p__Chloroflexota	c__Anaerolineae	o__Caldilineales	f__JAADDB01	g__	s__
553_2	GCA_015487975	public genome	1	1	0	0	nothing_new_here	p__Chloroflexota	c__Anaerolineae	o__Ardenticatenales	f__Ardenticatenaceae	g__Ardenticatena	s__
2126_0	GCA_015489255	public genome	1	1	0	0	nothing_new_here	p__Chloroflexota	c__Anaerolineae	o__Anaerolineales	f__EnvOPS12	g__	s__
1749_1	GCA_015489285	public genome	2	2	0	0	nothing_new_here	p__Chloroflexota	c__Anaerolineae	o__Caldilineales	f__JAADDB01	g__JAADDB01	s__
562_2	GCA_015489355	public genome	1	1	0	0	nothing_new_here	p__Chloroflexota	c__Anaerolineae	o__Caldilineales	f__J102	g__M2005	s__
377_0	GCA_015490995	public genome	1	1	0	0	nothing_new_here	p__Chloroflexota	c__Anaerolineae	o__Caldilineales	f__JAADDB01	g__JAADDB01	s__
554_1	GCA_015491235	public genome	2	2	0	0	nothing_new_here	p__Chloroflexota	c__Anaerolineae	o__Ardenticatenales	f__Ardenticatenaceae	g__	s__
1055_1	GCA_015491595	public genome	2	2	0	0	nothing_new_here	p__Chloroflexota	c__Anaerolineae	o__Anaerolineales	f__DRMV01	g__	s__
1263_2	GCA_015492875	public genome	1	1	0	0	nothing_new_here	p__Chloroflexota	c__Anaerolineae	o__SBR1031	f__A4b	g__	s__
563_2	GCA_015493675	public genome	1	1	0	0	nothing_new_here	p__Chloroflexota	c__Anaerolineae	o__Caldilineales	f__J102	g__M2005	s__
1790_2	GCA_015494005	public genome	1	1	0	0	nothing_new_here	p__Chloroflexota	c__Anaerolineae	o__Caldilineales	f__Caldilineaceae	g__	s__
2137_2	GCA_015494635	public genome	1	1	0	0	nothing_new_here	p__Chloroflexota	c__Anaerolineae	o__Anaerolineales	f__DRMV01	g__	s__
2289_2	GCA_015494815	public genome	1	1	0	0	nothing_new_here	p__Chloroflexota	c__Anaerolineae	o__Anaerolineales	f__DRMV01	g__JAADEN01	s__
1993_0	GCA_015500095	public genome	1	1	0	0	nothing_new_here	p__Chloroflexota	c__Anaerolineae	o__SBR1031	f__A4b	g__GCA-2699585	s__
1091_2	GCA_015658995	public genome	1	1	0	0	nothing_new_here	p__Chloroflexota	c__Dehalococcoidia	o__UBA3495	f__UBA3495	g__UBA1141	s__
1683_2	GCA_015660765	public genome	2	2	0	0	nothing_new_here	p__Chloroflexota	c__Anaerolineae	o__Anaerolineales	f__E44-bin32	g__DSPQ01	s__
1728_1	GCA_015661045	public genome	2	2	0	0	nothing_new_here	p__Chloroflexota	c__Dehalococcoidia	o__UBA2247	f__	g__	s__
1406_1	GCA_015661135	public genome	1	1	0	0	nothing_new_here	p__Chloroflexota	c__Ellin6529	o__CSP1-4	f__CSP1-4	g__UBA5189	s__
1043_0	GCA_015661155	public genome	1	1	0	0	nothing_new_here	p__Chloroflexota	c__Dehalococcoidia	o__UBA2985	f__UBA2985	g__	s__
2230_2	GCA_015662015	public genome	1	1	0	0	nothing_new_here	p__Chloroflexota	c__Anaerolineae	o__E26-bin7	f__JACIWR01	g__JACIWR01	s__
862_0	GCA_015662025	public genome	1	1	0	0	nothing_new_here	p__Chloroflexota	c__Anaerolineae	o__CG2-30-64-16	f__SSC4	g__	s__
1738_2	GCA_015662065	public genome	1	1	0	0	nothing_new_here	p__Chloroflexota	c__Anaerolineae	o__B4-G1	f__DUEL01	g__	s__
1737_1	GCA_015662115	public genome	2	2	0	0	nothing_new_here	p__Chloroflexota	c__Anaerolineae	o__B4-G1	f__DUEL01	g__DUEL01	s__
2311_0	GCA_015767235	public genome	1	1	0	0	nothing_new_here	p__Chloroflexota	c__Dehalococcoidia	o__Dehalococcoidales	f__Dehalococcoidaceae	g__	s__
191_0	GCA_015767335	public genome	1	1	0	0	nothing_new_here	p__Chloroflexota	c__Anaerolineae	o__Anaerolineales	f__UBA11858	g__NIOZ-UU35	s__
1026_0	GCA_016178045	public genome	1	1	0	0	nothing_new_here	p__Chloroflexota	c__Dehalococcoidia	o__SM23-28-2	f__RBG-16-64-32	g__	s__
2051_0	GCA_016178315	public genome	1	1	0	0	nothing_new_here	p__Chloroflexota	c__Anaerolineae	o__4572-78	f__J111	g__DSQQ01	s__
1052_1	GCA_016179765	public genome	2	2	0	0	nothing_new_here	p__Chloroflexota	c__Dehalococcoidia	o__UBA6952	f__SHYF01	g__	s__
935_0	GCA_016179845	public genome	1	1	0	0	nothing_new_here	p__Chloroflexota	c__Dehalococcoidia	o__UBA1127	f__	g__	s__
772_0	GCA_016183425	public genome	1	1	0	0	nothing_new_here	p__Chloroflexota	c__Dehalococcoidia	o__	f__	g__	s__
1326_1	GCA_016183435	public genome	2	2	0	0	nothing_new_here	p__Chloroflexota	c__Ellin6529	o__P2-11E	f__P2-11E	g__GWC2-70-10	s__
2190_1	GCA_016183455	public genome	2	2	0	0	nothing_new_here	p__Chloroflexota	c__Anaerolineae	o__Anaerolineales	f__EnvOPS12	g__OLB14	s__
626_1	GCA_016183485	public genome	3	3	0	0	nothing_new_here	p__Chloroflexota	c__Dehalococcoidia	o__Dehalococcoidales	f__UBA2162	g__	s__
761_0	GCA_016189825	public genome	1	1	0	0	nothing_new_here	p__Chloroflexota	c__Dehalococcoidia	o__GIF9	f__	g__	s__
1078_0	GCA_016189845	public genome	1	1	0	0	nothing_new_here	p__Chloroflexota	c__Dehalococcoidia	o__UBA1151	f__UBA1151	g__	s__
929_0	GCA_016189855	public genome	1	1	0	0	nothing_new_here	p__Chloroflexota	c__Dehalococcoidia	o__UBA1127	f__SHYT01	g__	s__
770_0	GCA_016189905	public genome	1	1	0	0	nothing_new_here	p__Chloroflexota	c__FW602-bin22	o__FW602-bin22	f__	g__	s__
1027_0	GCA_016190405	public genome	1	1	0	0	nothing_new_here	p__Chloroflexota	c__Dehalococcoidia	o__SM23-28-2	f__RBG-16-64-32	g__	s__
1019_0	GCA_016190445	public genome	1	1	0	0	nothing_new_here	p__Chloroflexota	c__Dehalococcoidia	o__UBA2963	f__	g__	s__
1208_0	GCA_016190465	public genome	1	1	0	0	nothing_new_here	p__Chloroflexota	c__FW602-bin22	o__FW602-bin22	f__	g__	s__
774_0	GCA_016190485	public genome	1	1	0	0	nothing_new_here	p__Chloroflexota	c__Dehalococcoidia	o__SHYD01	f__	g__	s__
1650_2	GCA_016190505	public genome	1	1	0	0	nothing_new_here	p__Chloroflexota	c__Dehalococcoidia	o__	f__	g__	s__
1651_0	GCA_016190535	public genome	1	1	0	0	nothing_new_here	p__Chloroflexota	c__Dehalococcoidia	o__	f__	g__	s__
930_0	GCA_016190545	public genome	1	1	0	0	nothing_new_here	p__Chloroflexota	c__Dehalococcoidia	o__SHYB01	f__	g__	s__
661_0	GCA_016190585	public genome	1	1	0	0	nothing_new_here	p__Chloroflexota	c__Dehalococcoidia	o__Dehalococcoidales	f__RBG-16-60-22	g__	s__
224_1	GCA_016190595	public genome	1	1	0	0	nothing_new_here	p__Chloroflexota	c__Dehalococcoidia	o__GIF9	f__	g__	s__
745_0	GCA_016190625	public genome	1	1	0	0	nothing_new_here	p__Chloroflexota	c__Dehalococcoidia	o__	f__	g__	s__
1044_0	GCA_016190635	public genome	1	1	0	0	nothing_new_here	p__Chloroflexota	c__Dehalococcoidia	o__UBA2985	f__UBA2985	g__	s__
762_0	GCA_016190665	public genome	1	1	0	0	nothing_new_here	p__Chloroflexota	c__Dehalococcoidia	o__	f__	g__	s__
887_0	GCA_016190675	public genome	1	1	0	0	nothing_new_here	p__Chloroflexota	c__Dehalococcoidia	o__GIF9	f__	g__	s__
1133_0	GCA_016190695	public genome	1	1	0	0	nothing_new_here	p__Chloroflexota	c__Dehalococcoidia	o__Dehalococcoidales	f__RBG-16-60-22	g__	s__
167_0	GCA_016190745	public genome	1	1	0	0	nothing_new_here	p__Chloroflexota	c__FW602-bin22	o__	f__	g__	s__
298_0	GCA_016190755	public genome	1	1	0	0	nothing_new_here	p__Chloroflexota	c__Dehalococcoidia	o__GIF9	f__	g__	s__
1638_0	GCA_016190785	public genome	1	1	0	0	nothing_new_here	p__Chloroflexota	c__Anaerolineae	o__UBA7937	f__UBA7937	g__	s__
456_0	GCA_016190815	public genome	1	1	0	0	nothing_new_here	p__Chloroflexota	c__Dehalococcoidia	o__	f__	g__	s__
610_0	GCA_016190825	public genome	1	1	0	0	nothing_new_here	p__Chloroflexota	c__Dehalococcoidia	o__Dehalococcoidales	f__UBA2162	g__UBA2162	s__
1048_1	GCA_016190885	public genome	1	1	0	0	nothing_new_here	p__Chloroflexota	c__Dehalococcoidia	o__Dehalococcoidales	f__	g__	s__
969_2	GCA_016190895	public genome	1	1	0	0	nothing_new_here	p__Chloroflexota	c__Dehalococcoidia	o__Dehalococcoidales	f__UBA2162	g__GCA-2685815	s__
1036_0	GCA_016190925	public genome	1	1	0	0	nothing_new_here	p__Chloroflexota	c__Dehalococcoidia	o__Dehalococcoidales	f__UBA3254	g__	s__
1405_5	GCA_016191345	public genome	1	1	0	0	nothing_new_here	p__Chloroflexota	c__Ellin6529	o__CSP1-4	f__CSP1-4	g__UBA5189	s__
1326_3	GCA_016191385	public genome	1	1	0	0	nothing_new_here	p__Chloroflexota	c__Ellin6529	o__P2-11E	f__P2-11E	g__	s__
1408_2	GCA_016191395	public genome	1	1	0	0	nothing_new_here	p__Chloroflexota	c__Ellin6529	o__CSP1-4	f__CSP1-4	g__UBA5189	s__
1406_2	GCA_016191425	public genome	1	1	0	0	nothing_new_here	p__Chloroflexota	c__Ellin6529	o__CSP1-4	f__CSP1-4	g__UBA5189	s__
1310_0	GCA_016191435	public genome	1	1	0	0	nothing_new_here	p__Chloroflexota	c__Dehalococcoidia	o__UBA2991	f__UBA2991	g__PNKC01	s__
1386_0	GCA_016191465	public genome	1	1	0	0	nothing_new_here	p__Chloroflexota	c__UBA6077	o__UBA6077	f__CF-72	g__	s__
2215_1	GCA_016191495	public genome	3	3	0	0	nothing_new_here	p__Chloroflexota	c__Anaerolineae	o__Anaerolineales	f__EnvOPS12	g__Fen-1038	s__
2132_2	GCA_016191845	public genome	1	1	0	0	nothing_new_here	p__Chloroflexota	c__Anaerolineae	o__Anaerolineales	f__EnvOPS12	g__	s__
1690_0	GCA_016191875	public genome	1	1	0	0	nothing_new_here	p__Chloroflexota	c__Anaerolineae	o__Anaerolineales	f__UBA11579	g__SCUK01	s__
2173_1	GCA_016191885	public genome	3	3	0	0	nothing_new_here	p__Chloroflexota	c__Anaerolineae	o__Anaerolineales	f__EnvOPS12	g__OLB14	s__
2173_3	GCA_016191895	public genome	1	1	0	0	nothing_new_here	p__Chloroflexota	c__Anaerolineae	o__Anaerolineales	f__EnvOPS12	g__OLB14	s__
2193_5	GCA_016191985	public genome	1	1	0	0	nothing_new_here	p__Chloroflexota	c__Anaerolineae	o__Anaerolineales	f__EnvOPS12	g__OLB14	s__
665_1	GCA_016193545	public genome	2	2	0	0	nothing_new_here	p__Chloroflexota	c__Dehalococcoidia	o__Dehalococcoidales	f__UBA2162	g__	s__
1329_0	GCA_016194865	public genome	1	1	0	0	nothing_new_here	p__Chloroflexota	c__Ellin6529	o__P2-11E	f__P2-11E	g__JACDAF01	s__
1146_1	GCA_016194885	public genome	2	2	0	0	nothing_new_here	p__Chloroflexota	c__Anaerolineae	o__UBA4142	f__UBA4142	g__	s__
1741_0	GCA_016196905	public genome	1	1	0	0	nothing_new_here	p__Chloroflexota	c__Anaerolineae	o__UBA7937	f__UBA7937	g__	s__
2046_2	GCA_016197225	public genome	1	1	0	0	nothing_new_here	p__Chloroflexota	c__Anaerolineae	o__Anaerolineales	f__UBA6663	g__	s__
1217_0	GCA_016199265	public genome	1	1	0	0	nothing_new_here	p__Chloroflexota	c__UBA2235	o__UBA12225	f__UBA12225	g__	s__
1446_0	GCA_016199325	public genome	1	1	0	0	nothing_new_here	p__Chloroflexota	c__Dehalococcoidia	o__SpSt-223	f__	g__	s__
526_0	GCA_016199365	public genome	1	1	0	0	nothing_new_here	p__Chloroflexota	c__FW602-bin22	o__	f__	g__	s__
1038_2	GCA_016199375	public genome	1	1	0	0	nothing_new_here	p__Chloroflexota	c__Dehalococcoidia	o__SHYM01	f__SHYM01	g__SHYM01	s__
1147_0	GCA_016199405	public genome	1	1	0	0	nothing_new_here	p__Chloroflexota	c__Anaerolineae	o__UBA4142	f__UBA4142	g__	s__
1833_3	GCA_016199425	public genome	1	1	0	0	nothing_new_here	p__Chloroflexota	c__Anaerolineae	o__Caldilineales	f__Caldilineaceae	g__	s__
219_2	GCA_016199465	public genome	1	1	0	0	nothing_new_here	p__Chloroflexota	c__Anaerolineae	o__UCB3	f__SHYO01	g__SHYO01	s__
1409_3	GCA_016200665	public genome	1	1	0	0	nothing_new_here	p__Chloroflexota	c__Ellin6529	o__CSP1-4	f__CSP1-4	g__UBA5189	s__
1405_4	GCA_016200675	public genome	1	1	0	0	nothing_new_here	p__Chloroflexota	c__Ellin6529	o__CSP1-4	f__CSP1-4	g__UBA5189	s__
858_2	GCA_016200725	public genome	1	1	0	0	nothing_new_here	p__Chloroflexota	c__Dehalococcoidia	o__SHYB01	f__SHYB01	g__	s__
1396_0	GCA_016200745	public genome	1	1	0	0	nothing_new_here	p__Chloroflexota	c__Ellin6529	o__CSP1-4	f__CSP1-4	g__SPCO01	s__
2015_1	GCA_016200765	public genome	2	2	0	0	nothing_new_here	p__Chloroflexota	c__Anaerolineae	o__UBA4142	f__	g__	s__
2214_2	GCA_016200775	public genome	1	1	0	0	nothing_new_here	p__Chloroflexota	c__Anaerolineae	o__Anaerolineales	f__EnvOPS12	g__Fen-1038	s__
2040_1	GCA_016200785	public genome	2	2	0	0	nothing_new_here	p__Chloroflexota	c__Anaerolineae	o__Anaerolineales	f__UBA6663	g__	s__
860_0	GCA_016202425	public genome	1	1	0	0	nothing_new_here	p__Chloroflexota	c__Dehalococcoidia	o__UBA6952	f__SHYF01	g__	s__
37_0	GCA_016202435	public genome	1	1	0	0	nothing_new_here	p__Chloroflexota	c__UBA6077	o__UBA6077	f__SHYK01	g__SHYK01	s__
1054_1	GCA_016202485	public genome	1	1	0	0	nothing_new_here	p__Chloroflexota	c__Dehalococcoidia	o__UBA6952	f__SHYF01	g__	s__
665_2	GCA_016202525	public genome	1	1	0	0	nothing_new_here	p__Chloroflexota	c__Dehalococcoidia	o__Dehalococcoidales	f__UBA2162	g__	s__
1037_0	GCA_016202545	public genome	1	1	0	0	nothing_new_here	p__Chloroflexota	c__Dehalococcoidia	o__Dehalococcoidales	f__W111	g__	s__
627_0	GCA_016202555	public genome	1	1	0	0	nothing_new_here	p__Chloroflexota	c__Dehalococcoidia	o__Dehalococcoidales	f__UBA2162	g__	s__
2048_3	GCA_016208285	public genome	1	1	0	0	nothing_new_here	p__Chloroflexota	c__Anaerolineae	o__Anaerolineales	f__RBG-16-64-43	g__	s__
1136_0	GCA_016208315	public genome	1	1	0	0	nothing_new_here	p__Chloroflexota	c__Anaerolineae	o__UBA4142	f__UBA4142	g__	s__
2233_2	GCA_016208355	public genome	1	1	0	0	nothing_new_here	p__Chloroflexota	c__Anaerolineae	o__Anaerolineales	f__EnvOPS12	g__UBA877	s__
2168_4	GCA_016208405	public genome	1	1	0	0	nothing_new_here	p__Chloroflexota	c__Anaerolineae	o__Anaerolineales	f__EnvOPS12	g__UBA12294	s__
1157_0	GCA_016209205	public genome	1	1	0	0	nothing_new_here	p__Chloroflexota	c__Anaerolineae	o__UBA4142	f__SHND01	g__SHND01	s__
947_2	GCA_016209545	public genome	1	1	0	0	nothing_new_here	p__Chloroflexota	c__Dehalococcoidia	o__DSTF01	f__RBG-16-68-14	g__RBG-16-68-14	s__
1825_1	GCA_016210125	public genome	2	2	0	0	nothing_new_here	p__Chloroflexota	c__FW602-bin22	o__	f__	g__	s__
1742_0	GCA_016210175	public genome	1	1	0	0	nothing_new_here	p__Chloroflexota	c__Dehalococcoidia	o__SHYD01	f__	g__	s__
1054_2	GCA_016210205	public genome	1	1	0	0	nothing_new_here	p__Chloroflexota	c__Dehalococcoidia	o__	f__	g__	s__
1022_0	GCA_016210215	public genome	1	1	0	0	nothing_new_here	p__Chloroflexota	c__Dehalococcoidia	o__UBA6926	f__	g__	s__
973_0	GCA_016210245	public genome	1	1	0	0	nothing_new_here	p__Chloroflexota	c__UBA6077	o__UBA6077	f__	g__	s__
457_0	GCA_016210285	public genome	1	1	0	0	nothing_new_here	p__Chloroflexota	c__Dehalococcoidia	o__UBA1127	f__HRBIN23	g__	s__
1047_0	GCA_016210295	public genome	1	1	0	0	nothing_new_here	p__Chloroflexota	c__Dehalococcoidia	o__UBA6926	f__	g__	s__
1023_0	GCA_016210325	public genome	1	1	0	0	nothing_new_here	p__Chloroflexota	c__Dehalococcoidia	o__UBA1127	f__HRBIN23	g__	s__
1076_0	GCA_016210335	public genome	1	1	0	0	nothing_new_here	p__Chloroflexota	c__Dehalococcoidia	o__UBA1151	f__UBA1151	g__	s__
1053_0	GCA_016210375	public genome	1	1	0	0	nothing_new_here	p__Chloroflexota	c__Dehalococcoidia	o__UBA6952	f__SHYF01	g__	s__
1051_2	GCA_016210395	public genome	1	1	0	0	nothing_new_here	p__Chloroflexota	c__Dehalococcoidia	o__UBA6952	f__SHYF01	g__	s__
817_0	GCA_016210425	public genome	1	1	0	0	nothing_new_here	p__Chloroflexota	c__Dehalococcoidia	o__	f__	g__	s__
1077_0	GCA_016210435	public genome	1	1	0	0	nothing_new_here	p__Chloroflexota	c__Dehalococcoidia	o__UBA1151	f__UBA1151	g__	s__
1039_0	GCA_016210485	public genome	1	1	0	0	nothing_new_here	p__Chloroflexota	c__Dehalococcoidia	o__	f__	g__	s__
771_0	GCA_016210495	public genome	1	1	0	0	nothing_new_here	p__Chloroflexota	c__FW602-bin22	o__FW602-bin22	f__	g__	s__
1045_0	GCA_016210515	public genome	1	1	0	0	nothing_new_here	p__Chloroflexota	c__Dehalococcoidia	o__UBA2985	f__UBA2985	g__VEXC01	s__
224_2	GCA_016210545	public genome	1	1	0	0	nothing_new_here	p__Chloroflexota	c__Dehalococcoidia	o__JdFR-54	f__	g__	s__
775_0	GCA_016210565	public genome	1	1	0	0	nothing_new_here	p__Chloroflexota	c__Dehalococcoidia	o__UBA2247	f__	g__	s__
600_0	GCA_016210585	public genome	1	1	0	0	nothing_new_here	p__Chloroflexota	c__Dehalococcoidia	o__Dehalococcoidales	f__UBA3254	g__	s__
1006_0	GCA_016210665	public genome	1	1	0	0	nothing_new_here	p__Chloroflexota	c__Dehalococcoidia	o__	f__	g__	s__
571_0	GCA_016210685	public genome	1	1	0	0	nothing_new_here	p__Chloroflexota	c__Dehalococcoidia	o__Dehalococcoidales	f__UBA2162	g__	s__
1048_2	GCA_016210695	public genome	1	1	0	0	nothing_new_here	p__Chloroflexota	c__Dehalococcoidia	o__Dehalococcoidales	f__UBA2162	g__	s__
2071_0	GCA_016210705	public genome	1	1	0	0	nothing_new_here	p__Chloroflexota	c__Dehalococcoidia	o__SZUA-161	f__	g__	s__
628_0	GCA_016210755	public genome	1	1	0	0	nothing_new_here	p__Chloroflexota	c__Dehalococcoidia	o__Dehalococcoidales	f__UBA2162	g__	s__
2132_3	GCA_016213105	public genome	1	1	0	0	nothing_new_here	p__Chloroflexota	c__Anaerolineae	o__Anaerolineales	f__EnvOPS12	g__	s__
1265_2	GCA_016213115	public genome	1	1	0	0	nothing_new_here	p__Chloroflexota	c__Dehalococcoidia	o__DSTF01	f__	g__	s__
1271_0	GCA_016213125	public genome	1	1	0	0	nothing_new_here	p__Chloroflexota	c__Dehalococcoidia	o__DSTF01	f__	g__	s__
2048_1	GCA_016213135	public genome	6	6	0	0	nothing_new_here	p__Chloroflexota	c__Anaerolineae	o__Anaerolineales	f__UBA6663	g__	s__
2234_0	GCA_016213455	public genome	1	1	0	0	nothing_new_here	p__Chloroflexota	c__Anaerolineae	o__Anaerolineales	f__Anaerolineaceae	g__Anaerolinea	s__
2106_0	GCA_016215025	public genome	1	1	0	0	nothing_new_here	p__Chloroflexota	c__Anaerolineae	o__UBA4142	f__UBA4142	g__UBA4142	s__
1117_3	GCA_016215145	public genome	5	5	0	0	nothing_new_here	p__Chloroflexota	c__Anaerolineae	o__Anaerolineales	f__UBA6663	g__	s__
2077_1	GCA_016219235	public genome	1	1	0	0	nothing_new_here	p__Chloroflexota	c__Anaerolineae	o__Thermoflexales	f__Fen-1058	g__Fen-1058	s__
1141_1	GCA_016219275	public genome	1	1	0	0	nothing_new_here	p__Chloroflexota	c__Anaerolineae	o__UBA4142	f__UBA4142	g__	s__
2201_0	GCA_016219545	public genome	1	1	0	0	nothing_new_here	p__Chloroflexota	c__Anaerolineae	o__Anaerolineales	f__EnvOPS12	g__OLB14	s__
1914_0	GCA_016223085	public genome	1	1	0	0	nothing_new_here	p__Chloroflexota	c__Anaerolineae	o__SBR1031	f__A4b	g__CFX2	s__
1141_2	GCA_016223105	public genome	1	1	0	0	nothing_new_here	p__Chloroflexota	c__Anaerolineae	o__UBA4142	f__UBA4142	g__	s__
1311_0	GCA_016234445	public genome	1	1	0	0	nothing_new_here	p__Chloroflexota	c__Dehalococcoidia	o__UBA2991	f__UBA2991	g__UCB2	s__
2172_3	GCA_016234485	public genome	1	1	0	0	nothing_new_here	p__Chloroflexota	c__Anaerolineae	o__Anaerolineales	f__EnvOPS12	g__UBA7227	s__
2200_3	GCA_016234495	public genome	1	1	0	0	nothing_new_here	p__Chloroflexota	c__Anaerolineae	o__Anaerolineales	f__EnvOPS12	g__OLB14	s__
1873_0	GCA_016234525	public genome	1	1	0	0	nothing_new_here	p__Chloroflexota	c__Anaerolineae	o__SBR1031	f__UBA2029	g__UBA2029	s__
2200_2	GCA_016234535	public genome	1	1	0	0	nothing_new_here	p__Chloroflexota	c__Anaerolineae	o__Anaerolineales	f__EnvOPS12	g__OLB14	s__
2182_4	GCA_016234555	public genome	1	1	0	0	nothing_new_here	p__Chloroflexota	c__Anaerolineae	o__Anaerolineales	f__EnvOPS12	g__OLB14	s__
2517_5	GCA_016234595	public genome	1	1	0	0	nothing_new_here	p__Chloroflexota	c__Anaerolineae	o__SBR1031	f__J027	g__CFX10	s__
1569_0	GCA_016235055	public genome	1	1	0	0	nothing_new_here	p__Chloroflexota	c__Anaerolineae	o__UBA4142	f__	g__	s__
2213_0	GCA_016235425	public genome	1	1	0	0	nothing_new_here	p__Chloroflexota	c__Anaerolineae	o__Anaerolineales	f__EnvOPS12	g__OLB14	s__
2193_3	GCA_016235445	public genome	1	1	0	0	nothing_new_here	p__Chloroflexota	c__Anaerolineae	o__Anaerolineales	f__EnvOPS12	g__OLB14	s__
161_1	GCA_016284035	public genome	2	2	0	0	nothing_new_here	p__Chloroflexota	c__Dehalococcoidia	o__Dehalococcoidales	f__UBA1222	g__UBA1222	s__
161_3	GCA_016286345	public genome	1	1	0	0	nothing_new_here	p__Chloroflexota	c__Dehalococcoidia	o__Dehalococcoidales	f__UBA1222	g__UBA1222	s__
82_7	GCA_016462525	public genome	4	4	0	0	nothing_new_here	p__Chloroflexota	c__Ellin6529	o__CSP1-4	f__UBA10416	g__UBA10416	s__
1418_2	GCA_016464725	public genome	1	1	0	0	nothing_new_here	p__Dormibacterota	c__Dormibacteria	o__Dormibacterales	f__Dormibacteraceae	g__Dormibacter	s__
1451_0	GCA_016464765	public genome	1	1	0	0	nothing_new_here	p__Dormibacterota	c__Dormibacteria	o__UBA8260	f__UBA8260	g__Palsa-875	s__Palsa-875 sp003244045
1418_3	GCA_016464775	public genome	1	1	0	0	nothing_new_here	p__Dormibacterota	c__Dormibacteria	o__Dormibacterales	f__Dormibacteraceae	g__QHBS01	s__QHBS01 sp003243885
1452_0	GCA_016464795	public genome	1	1	0	0	nothing_new_here	p__Dormibacterota	c__Dormibacteria	o__UBA8260	f__UBA8260	g__	s__
32_0	GCA_016587395	public genome	1	1	0	0	nothing_new_here	p__Chloroflexota	c__Ktedonobacteria	o__Ktedonobacterales	f__Ktedonobacteraceae	g__Ktedonobacter	s__
29_2	GCA_016587435	public genome	1	1	0	0	nothing_new_here	p__Chloroflexota	c__Ktedonobacteria	o__Ktedonobacterales	f__Ktedonobacteraceae	g__Dictyobacter	s__
45_0	GCA_016587455	public genome	1	1	0	0	nothing_new_here	p__Chloroflexota	c__Ktedonobacteria	o__Ktedonobacterales	f__Ktedonobacteraceae	g__	s__
2118_0	GCA_016649505	public genome	1	1	0	0	nothing_new_here	p__Chloroflexota	c__Anaerolineae	o__Anaerolineales	f__UBA4823	g__DSPF01	s__
2309_2	GCA_016703025	public genome	1	1	0	0	nothing_new_here	p__Chloroflexota	c__Anaerolineae	o__UCB3	f__UCB3	g__	s__
1308_2	GCA_016703545	public genome	1	1	0	0	nothing_new_here	p__Chloroflexota	c__Dehalococcoidia	o__UBA2991	f__UBA2991	g__PNKC01	s__
1953_1	GCA_016705235	public genome	4	4	0	0	nothing_new_here	p__Chloroflexota	c__Anaerolineae	o__Promineofilales	f__Promineofilaceae	g__GCA-2746795	s__
1979_3	GCA_016707605	public genome	1	1	0	0	nothing_new_here	p__Chloroflexota	c__Anaerolineae	o__Promineofilales	f__Promineofilaceae	g__Promineofilum	s__
2199_1	GCA_016709305	public genome	2	2	0	0	nothing_new_here	p__Chloroflexota	c__Anaerolineae	o__Anaerolineales	f__EnvOPS12	g__OLB14	s__
1949_2	GCA_016710325	public genome	1	1	0	0	nothing_new_here	p__Chloroflexota	c__Anaerolineae	o__Promineofilales	f__Promineofilaceae	g__GCA-2699125	s__
1814_2	GCA_016710365	public genome	1	1	0	0	nothing_new_here	p__Chloroflexota	c__Anaerolineae	o__Caldilineales	f__Caldilineaceae	g__Caldilinea	s__
1303_1	GCA_016710695	public genome	10	10	0	0	nothing_new_here	p__Chloroflexota	c__Dehalococcoidia	o__UBA2991	f__UBA2991	g__41671	s__
542_1	GCA_016710785	public genome	3	3	0	0	nothing_new_here	p__Chloroflexota	c__Anaerolineae	o__UCB3	f__UCB3	g__	s__
181_0	GCA_016711405	public genome	1	1	0	0	nothing_new_here	p__Chloroflexota	c__Anaerolineae	o__Promineofilales	f__Promineofilaceae	g__WTJY01	s__
869_0	GCA_016712885	public genome	1	1	0	0	nothing_new_here	p__Chloroflexota	c__Anaerolineae	o__SBR1031	f__A4b	g__OLB13	s__
1922_3	GCA_016713325	public genome	1	1	0	0	nothing_new_here	p__Chloroflexota	c__Anaerolineae	o__SBR1031	f__A4b	g__OLB15	s__
2359_0	GCA_016713335	public genome	1	1	0	0	nothing_new_here	p__Chloroflexota	c__Anaerolineae	o__Caldilineales	f__Caldilineaceae	g__	s__
1921_1	GCA_016713355	public genome	3	3	0	0	nothing_new_here	p__Chloroflexota	c__Anaerolineae	o__SBR1031	f__A4b	g__OLB15	s__
1947_3	GCA_016713825	public genome	1	1	0	0	nothing_new_here	p__Chloroflexota	c__Anaerolineae	o__Promineofilales	f__Promineofilaceae	g__GCA-2699125	s__
2305_2	GCA_016714465	public genome	1	1	0	0	nothing_new_here	p__Chloroflexota	c__Anaerolineae	o__Thermoflexales	f__J036	g__	s__
2192_2	GCA_016714565	public genome	1	1	0	0	nothing_new_here	p__Chloroflexota	c__Anaerolineae	o__Anaerolineales	f__EnvOPS12	g__OLB14	s__
1954_0	GCA_016716065	public genome	1	1	0	0	nothing_new_here	p__Chloroflexota	c__Anaerolineae	o__Promineofilales	f__Promineofilaceae	g__GCA-2746795	s__
1121_1	GCA_016716885	public genome	1	1	0	0	nothing_new_here	p__Chloroflexota	c__Anaerolineae	o__Promineofilales	f__Promineofilaceae	g__	s__
2195_1	GCA_016717045	public genome	3	3	0	0	nothing_new_here	p__Chloroflexota	c__Anaerolineae	o__Anaerolineales	f__EnvOPS12	g__OLB14	s__
1580_0	GCA_016717335	public genome	1	1	0	0	nothing_new_here	p__Chloroflexota	c__Chloroflexia	o__Chloroflexales	f__Roseiflexaceae	g__Kouleothrix	s__
2000_2	GCA_016719785	public genome	5	4	1	0	mostly_old	p__Chloroflexota	c__Anaerolineae	o__CG2-30-64-16	f__SSC4	g__SSC4	s__
2160_0	GCA_016721115	public genome	1	1	0	0	nothing_new_here	p__Chloroflexota	c__Anaerolineae	o__Anaerolineales	f__EnvOPS12	g__UBA12294	s__
2183_1	GCA_016721315	public genome	1	1	0	0	nothing_new_here	p__Chloroflexota	c__Anaerolineae	o__Anaerolineales	f__EnvOPS12	g__OLB14	s__
1581_2	GCA_016722075	public genome	1	1	0	0	nothing_new_here	p__Chloroflexota	c__Chloroflexia	o__Chloroflexales	f__Roseiflexaceae	g__Kouleothrix	s__
2196_1	GCA_016722685	public genome	3	3	0	0	nothing_new_here	p__Chloroflexota	c__Anaerolineae	o__Anaerolineales	f__EnvOPS12	g__OLB14	s__
215_0	GCA_016744335	public genome	1	1	0	0	nothing_new_here	p__Chloroflexota	c__Anaerolineae	o__Anaerolineales	f__EnvOPS12	g__NIOZ-UU36	s__
1205_0	GCA_016781415	public genome	1	1	0	0	nothing_new_here	p__Chloroflexota	c__Chloroflexia	o__Thermomicrobiales	f__UBA6265	g__CADCWI01	s__
1476_1	GCA_016781445	public genome	3	3	0	0	nothing_new_here	p__Chloroflexota	c__Chloroflexia	o__Chloroflexales	f__Herpetosiphonaceae	g__JKG1	s__
1361_0	GCA_016781485	public genome	1	1	0	0	nothing_new_here	p__Chloroflexota	c__Ellin6529	o__CSP1-4	f__CSP1-4	g__	s__
1597_1	GCA_016781925	public genome	2	2	0	0	nothing_new_here	p__Chloroflexota	c__Chloroflexia	o__Thermomicrobiales	f__UBA6265	g__	s__
1549_2	GCA_016782125	public genome	1	1	0	0	nothing_new_here	p__Chloroflexota	c__Chloroflexia	o__Thermobaculales	f__Thermobaculaceae	g__JACDAU01	s__
1550_0	GCA_016782175	public genome	1	1	0	0	nothing_new_here	p__Chloroflexota	c__Chloroflexia	o__Thermobaculales	f__Thermobaculaceae	g__JACDAU01	s__
663_9	GCA_016783105	public genome	1	1	0	0	nothing_new_here	p__Chloroflexota	c__Dehalococcoidia	o__Dehalococcoidales	f__RBG-16-60-22	g__E44-bin89	s__
878_1	GCA_016783125	public genome	1	1	0	0	nothing_new_here	p__Chloroflexota	c__Anaerolineae	o__Anaerolineales	f__UBA11858	g__NIOZ-UU35	s__
527_1	GCA_016783135	public genome	1	1	0	0	nothing_new_here	p__Chloroflexota	c__Dehalococcoidia	o__Dehalococcoidales	f__Fen-1064	g__DUES01	s__
1838_1	GCA_016783145	public genome	2	1	1	0	old+new_onlyMAGsSRA	p__Chloroflexota	c__Anaerolineae	o__E26-bin7	f__JACIWR01	g__	s__
684_1	GCA_016783155	public genome	2	1	1	0	old+new_onlyMAGsSRA	p__Chloroflexota	c__Dehalococcoidia	o__GIF9	f__UBA5620	g__9FT-COMBO-48-23	s__
435_2	GCA_016783205	public genome	1	1	0	0	nothing_new_here	p__Chloroflexota	c__Dehalococcoidia	o__UBA2777	f__RBG-13-53-26	g__	s__
679_3	GCA_016783225	public genome	1	1	0	0	nothing_new_here	p__Chloroflexota	c__Dehalococcoidia	o__GIF9	f__UBA5620	g__JACNFS01	s__
1247_5	GCA_016783285	public genome	1	1	0	0	nothing_new_here	p__Chloroflexota	c__Anaerolineae	o__B4-G1	f__B4-G1	g__B30-G15	s__
878_2	GCA_016785015	public genome	1	1	0	0	nothing_new_here	p__Chloroflexota	c__Anaerolineae	o__Anaerolineales	f__UBA11858	g__NIOZ-UU35	s__
1916_0	GCA_016788435	public genome	1	1	0	0	nothing_new_here	p__Chloroflexota	c__Anaerolineae	o__SBR1031	f__A4b	g__OLB15	s__
1957_0	GCA_016788625	public genome	1	1	0	0	nothing_new_here	p__Chloroflexota	c__Anaerolineae	o__SBR1031	f__A4b	g__CFX2	s__
1912_2	GCA_016788965	public genome	1	1	0	0	nothing_new_here	p__Chloroflexota	c__Anaerolineae	o__SBR1031	f__A4b	g__CFX2	s__
1922_2	GCA_016789005	public genome	1	1	0	0	nothing_new_here	p__Chloroflexota	c__Anaerolineae	o__SBR1031	f__A4b	g__OLB15	s__
2246_3	GCA_016789165	public genome	1	1	0	0	nothing_new_here	p__Chloroflexota	c__Anaerolineae	o__Anaerolineales	f__UBA6663	g__SpSt-583	s__
1679_2	GCA_016789175	public genome	1	1	0	0	nothing_new_here	p__Chloroflexota	c__Anaerolineae	o__Anaerolineales	f__UBA6663	g__UBA6663	s__
2152_7	GCA_016789205	public genome	1	1	0	0	nothing_new_here	p__Chloroflexota	c__Anaerolineae	o__Anaerolineales	f__EnvOPS12	g__OLB14	s__
2184_0	GCA_016789225	public genome	1	1	0	0	nothing_new_here	p__Chloroflexota	c__Anaerolineae	o__Anaerolineales	f__EnvOPS12	g__OLB14	s__
2202_0	GCA_016789305	public genome	1	1	0	0	nothing_new_here	p__Chloroflexota	c__Anaerolineae	o__Anaerolineales	f__EnvOPS12	g__OLB14	s__
2152_3	GCA_016789345	public genome	1	1	0	0	nothing_new_here	p__Chloroflexota	c__Anaerolineae	o__Anaerolineales	f__EnvOPS12	g__OLB14	s__
2193_2	GCA_016789485	public genome	1	1	0	0	nothing_new_here	p__Chloroflexota	c__Anaerolineae	o__Anaerolineales	f__EnvOPS12	g__OLB14	s__
[truncated: 1,510 more rows]

## Sheet: high quality
Cluster	Best genome of cluster	origin of best genome	total count of genomes in cluster	old genomes	new MAGs from SRA	new MAGs from samples	new cluster?	tax__p	tax__c	tax__o	tax__f	tax__g	tax__s
232_3	61435.1	public genome	3	3	0	0	nothing_new_here	p__Chloroflexota	c__Dehalococcoidia	o__Dehalococcoidales	f__Dehalococcoidaceae	g__Dehalococcoides	s__Dehalococcoides mccartyi_A
873_2	71864.6	public genome	1	1	0	0	nothing_new_here	p__Chloroflexota	c__Anaerolineae	o__Anaerolineales	f__EnvOPS12	g__OLB14	s__
740_1	167964	public genome	1	1	0	0	nothing_new_here	p__Chloroflexota	c__Anaerolineae	o__Anaerolineales	f__Anaerolineaceae	g__Bellilinea	s__Bellilinea sp003448875
809_1	167964	public genome	2	1	1	0	old+new_onlyMAGsSRA	p__Chloroflexota	c__Anaerolineae	o__Anaerolineales	f__Anaerolineaceae	g__Anaerolinea	s__
843_1	167965	public genome	1	1	0	0	nothing_new_here	p__Chloroflexota	c__Anaerolineae	o__Anaerolineales	f__EnvOPS12	g__UBA7227	s__
830_2	444458	public genome	1	1	0	0	nothing_new_here	p__Chloroflexota	c__Anaerolineae	o__Anaerolineales	f__EnvOPS12	g__UBA877	s__UBA877 sp903873975
817_1	452435	public genome	2	1	1	0	old+new_onlyMAGsSRA	p__Chloroflexota	c__Anaerolineae	o__Anaerolineales	f__EnvOPS12	g__UBA5195	s__UBA5195 sp903838415
578_2	480224	public genome	5	2	2	1	old+new_MAGsSRA+Sample	p__Chloroflexota	c__Chloroflexia	o__Chloroflexales	f__Chloroflexaceae	g__Chloroflexus	s__Chloroflexus aurantiacus
34_5	732234	public genome	2	1	0	1	old+new_onlyMAGsSample	p__Chloroflexota	c__Ktedonobacteria	o__Ktedonobacterales	f__Ktedonobacteraceae	g__Thermogemmatispora	s__Thermogemmatispora onikobensis
246_1	1.8398e+06	public genome	1	1	0	0	nothing_new_here	p__Chloroflexota	c__Dehalococcoidia	o__Dehalococcoidales	f__Dehalococcoidaceae	g__Dehalogenimonas	s__Dehalogenimonas formicexedens
847_0	1.87252e+06	public genome	1	1	0	0	nothing_new_here	p__Chloroflexota	c__Anaerolineae	o__Anaerolineales	f__EnvOPS12	g__UBA8950	s__
852_0	1.87252e+06	public genome	1	1	0	0	nothing_new_here	p__Chloroflexota	c__Anaerolineae	o__Anaerolineales	f__EnvOPS12	g__UBA5195	s__
61_0	1.87252e+06	public genome	1	1	0	0	nothing_new_here	p__Chloroflexota	c__Anaerolineae	o__Anaerolineales	f__UBA4823	g__UBA4823	s__
890_3	1.87252e+06	public genome	1	1	0	0	nothing_new_here	p__Chloroflexota	c__Anaerolineae	o__Anaerolineales	f__EnvOPS12	g__UBA12294	s__
1073_1	1.87252e+06	public genome	1	1	0	0	nothing_new_here	p__Chloroflexota	c__Anaerolineae	o__SBR1031	f__UBA2029	g__	s__
900_1	1.87252e+06	public genome	1	1	0	0	nothing_new_here	p__Chloroflexota	c__Anaerolineae	o__SpSt-313	f__SpSt-313	g__SpSt-313	s__
813_1	1.87252e+06	public genome	1	1	0	0	nothing_new_here	p__Chloroflexota	c__Anaerolineae	o__Anaerolineales	f__Anaerolineaceae	g__Ch132	s__
807_1	1.88981e+06	public genome	3	2	1	0	old+new_onlyMAGsSRA	p__Chloroflexota	c__Anaerolineae	o__Anaerolineales	f__Anaerolineaceae	g__Flexilinea	s__Flexilinea sp001717545
1093_6	1.96974e+06	public genome	1	1	0	0	nothing_new_here	p__Chloroflexota	c__Anaerolineae	o__B4-G1	f__SLSP01	g__DSWT01	s__
142_1	1.9862e+06	public genome	1	1	0	0	nothing_new_here	p__Chloroflexota	c__Anaerolineae	o__Anaerolineales	f__Anaerolineaceae	g__Brevefilum	s__Brevefilum fermentans
956_1	2.0249e+06	public genome	1	1	0	0	nothing_new_here	p__Chloroflexota	c__Anaerolineae	o__SBR1031	f__A4b	g__GCA-2699585	s__
602_0	2.0249e+06	public genome	1	1	0	0	nothing_new_here	p__Chloroflexota	c__Anaerolineae	o__SBR1031	f__A4b	g__	s__
54_0	2.0249e+06	public genome	1	1	0	0	nothing_new_here	p__Chloroflexota	c__Anaerolineae	o__Anaerolineales	f__Anaerolineaceae	g__UBA5203	s__
1106_3	2.02672e+06	public genome	1	1	0	0	nothing_new_here	p__Chloroflexota	c__Chloroflexia	o__Chloroflexales	f__Herpetosiphonaceae	g__Herpetosiphon	s__
1093_7	2.02672e+06	public genome	1	1	0	0	nothing_new_here	p__Chloroflexota	c__Anaerolineae	o__B4-G1	f__SLSP01	g__DSWT01	s__
273_0	2.02672e+06	public genome	1	1	0	0	nothing_new_here	p__Chloroflexota	c__Anaerolineae	o__UBA1429	f__UBA1429	g__	s__
856_1	2.02672e+06	public genome	1	1	0	0	nothing_new_here	p__Chloroflexota	c__Anaerolineae	o__Anaerolineales	f__EnvOPS12	g__DTJF01	s__
1039_0	2.02672e+06	public genome	1	1	0	0	nothing_new_here	p__Chloroflexota	c__Anaerolineae	o__SBR1031	f__Ch27	g__Ch27	s__
77_0	2.02672e+06	public genome	1	1	0	0	nothing_new_here	p__Chloroflexota	c__Anaerolineae	o__JAAYEA01	f__JAAYEA01	g__	s__
1093_1	2.02672e+06	public genome	3	2	1	0	old+new_onlyMAGsSRA	p__Chloroflexota	c__Anaerolineae	o__B4-G1	f__SLSP01	g__DSWT01	s__DSWT01 sp011370065
855_2	2.02672e+06	public genome	1	1	0	0	nothing_new_here	p__Chloroflexota	c__Anaerolineae	o__Anaerolineales	f__EnvOPS12	g__DSXF01	s__
687_0	2.02672e+06	public genome	1	1	0	0	nothing_new_here	p__Chloroflexota	c__UBA6077	o__UBA6077	f__CF-72	g__	s__
1074_0	2.02672e+06	public genome	1	1	0	0	nothing_new_here	p__Chloroflexota	c__Chloroflexia	o__	f__	g__	s__
688_0	2.02672e+06	public genome	1	1	0	0	nothing_new_here	p__Chloroflexota	c__UBA6077	o__UBA6077	f__CF-72	g__	s__
455_1	2.02672e+06	public genome	1	1	0	0	nothing_new_here	p__Chloroflexota	c__UBA11872	o__VXOZ01	f__VXOZ01	g__VXOZ01	s__VXOZ01 sp012270555
1136_3	2.02673e+06	public genome	1	1	0	0	nothing_new_here	p__Chloroflexota	c__Dehalococcoidia	o__UBA1151	f__Bin127	g__Bin127	s__Bin127 sp012270805
530_0	2.02673e+06	public genome	1	1	0	0	nothing_new_here	p__Chloroflexota	c__Dehalococcoidia	o__UBA2991	f__UBA2991	g__	s__
502_0	2.02673e+06	public genome	1	1	0	0	nothing_new_here	p__Chloroflexota	c__Dehalococcoidia	o__UBA2979	f__UBA2979	g__RBC038	s__
540_1	2.02673e+06	public genome	1	1	0	0	nothing_new_here	p__Chloroflexota	c__Dehalococcoidia	o__UBA2991	f__UBA2991	g__	s__
542_0	2.02673e+06	public genome	1	1	0	0	nothing_new_here	p__Chloroflexota	c__Dehalococcoidia	o__UBA2991	f__UBA2991	g__	s__
535_0	2.02673e+06	public genome	1	1	0	0	nothing_new_here	p__Chloroflexota	c__Dehalococcoidia	o__UBA2991	f__UBA2991	g__41671	s__
958_4	2.05214e+06	public genome	1	1	0	0	nothing_new_here	p__Chloroflexota	c__Anaerolineae	o__SBR1031	f__A4b	g__UBA6055	s__UBA6055 sp012270545
1075_0	2.05214e+06	public genome	1	1	0	0	nothing_new_here	p__Chloroflexota	c__Anaerolineae	o__Caldilineales	f__JAAEKA01	g__JAAEKA01	s__
87_0	2.05214e+06	public genome	1	1	0	0	nothing_new_here	p__Chloroflexota	c__Anaerolineae	o__SBR1031	f__A4b	g__CFX2	s__
68_1	2.05214e+06	public genome	1	1	0	0	nothing_new_here	p__Chloroflexota	c__Anaerolineae	o__SBR1031	f__J027	g__CFX10	s__
1004_3	2.05214e+06	public genome	1	1	0	0	nothing_new_here	p__Chloroflexota	c__Anaerolineae	o__Promineofilales	f__Promineofilaceae	g__GCA-2699125	s__
999_0	2.05214e+06	public genome	1	1	0	0	nothing_new_here	p__Chloroflexota	c__Anaerolineae	o__SBR1031	f__A4b	g__OLB15	s__
650_0	2.05214e+06	public genome	1	1	0	0	nothing_new_here	p__Chloroflexota	c__Anaerolineae	o__UBA4142	f__SHND01	g__SHND01	s__
738_1	2.05214e+06	public genome	2	2	0	0	nothing_new_here	p__Chloroflexota	c__Anaerolineae	o__SBR1031	f__UBA2796	g__UBA2796	s__
846_1	2.07312e+06	public genome	1	1	0	0	nothing_new_here	p__Chloroflexota	c__Anaerolineae	o__Anaerolineales	f__EnvOPS12	g__UBA8950	s__
88_0	2.07312e+06	public genome	1	1	0	0	nothing_new_here	p__Chloroflexota	c__Anaerolineae	o__Anaerolineales	f__Anaerolineaceae	g__Ornatilinea	s__
884_0	2.07312e+06	public genome	1	1	0	0	nothing_new_here	p__Chloroflexota	c__Anaerolineae	o__Anaerolineales	f__EnvOPS12	g__OLB14	s__OLB14 sp003599285
744_0	2.07312e+06	public genome	1	1	0	0	nothing_new_here	p__Chloroflexota	c__Anaerolineae	o__Anaerolineales	f__DRKV01	g__DRKV01	s__
964_0	2.07312e+06	public genome	1	1	0	0	nothing_new_here	p__Chloroflexota	c__Anaerolineae	o__Promineofilales	f__Promineofilaceae	g__JAACFF01	s__
997_0	2.07312e+06	public genome	1	1	0	0	nothing_new_here	p__Chloroflexota	c__Anaerolineae	o__Anaerolineales	f__UBA6668	g__	s__
1108_0	2.07312e+06	public genome	1	1	0	0	nothing_new_here	p__Chloroflexota	c__Anaerolineae	o__SBR1031	f__J027	g__	s__
1129_0	2.07312e+06	public genome	1	1	0	0	nothing_new_here	p__Chloroflexota	c__Anaerolineae	o__4572-78	f__J111	g__J095	s__
885_3	2.07312e+06	public genome	1	1	0	0	nothing_new_here	p__Chloroflexota	c__Anaerolineae	o__Anaerolineales	f__EnvOPS12	g__OLB14	s__
887_0	2.07312e+06	public genome	1	1	0	0	nothing_new_here	p__Chloroflexota	c__Anaerolineae	o__Anaerolineales	f__EnvOPS12	g__OLB14	s__
565_0	2.07312e+06	public genome	1	1	0	0	nothing_new_here	p__Chloroflexota	c__Anaerolineae	o__Anaerolineales	f__UBA6663	g__	s__
879_4	2.07312e+06	public genome	1	1	0	0	nothing_new_here	p__Chloroflexota	c__Anaerolineae	o__Anaerolineales	f__EnvOPS12	g__UBA12294	s__
803_2	2.07312e+06	public genome	1	1	0	0	nothing_new_here	p__Chloroflexota	c__Anaerolineae	o__Anaerolineales	f__UBA6663	g__	s__
863_0	2.07312e+06	public genome	1	1	0	0	nothing_new_here	p__Chloroflexota	c__Anaerolineae	o__Anaerolineales	f__EnvOPS12	g__OLB14	s__
116_0	2.08024e+06	public genome	1	1	0	0	nothing_new_here	p__Chloroflexota	c__Anaerolineae	o__Anaerolineales	f__Anaerolineaceae	g__Ornatilinea	s__
382_4	2.30606e+06	public genome	1	1	0	0	nothing_new_here	p__Chloroflexota	c__Anaerolineae	o__Caldilineales	f__Bin34	g__Bin34	s__Bin34 sp012271135
1053_1	2.30606e+06	public genome	2	1	1	0	old+new_onlyMAGsSRA	p__Chloroflexota	c__Anaerolineae	o__Caldilineales	f__J102	g__JABWBG01	s__
386_0	2.48279e+06	public genome	1	1	0	0	nothing_new_here	p__Chloroflexota	c__Chloroflexia	o__Thermomicrobiales	f__UBA6265	g__UBA6265	s__
1026_0	2.61425e+06	public genome	1	1	0	0	nothing_new_here	p__Chloroflexota	c__Anaerolineae	o__Promineofilales	f__Promineofilaceae	g__	s__
837_0	2.61425e+06	public genome	1	1	0	0	nothing_new_here	p__Chloroflexota	c__Anaerolineae	o__Promineofilales	f__Promineofilaceae	g__GCA-2746795	s__
1004_1	2.61425e+06	public genome	1	1	0	0	nothing_new_here	p__Chloroflexota	c__Anaerolineae	o__Promineofilales	f__Promineofilaceae	g__GCA-2699125	s__
1004_5	2.61425e+06	public genome	1	1	0	0	nothing_new_here	p__Chloroflexota	c__Anaerolineae	o__Promineofilales	f__Promineofilaceae	g__GCA-2699125	s__
1004_2	2.61425e+06	public genome	1	1	0	0	nothing_new_here	p__Chloroflexota	c__Anaerolineae	o__Promineofilales	f__Promineofilaceae	g__GCA-2699125	s__
1008_0	2.61425e+06	public genome	1	1	0	0	nothing_new_here	p__Chloroflexota	c__Anaerolineae	o__Promineofilales	f__Promineofilaceae	g__	s__
1110_0	2.61425e+06	public genome	1	1	0	0	nothing_new_here	p__Chloroflexota	c__Anaerolineae	o__Ardenticatenales	f__Ardenticatenaceae	g__	s__
544_1	2.61425e+06	public genome	1	1	0	0	nothing_new_here	p__Chloroflexota	c__Anaerolineae	o__UCB3	f__UCB3	g__	s__
1035_0	2.61425e+06	public genome	1	1	0	0	nothing_new_here	p__Chloroflexota	c__Anaerolineae	o__Caldilineales	f__Caldilineaceae	g__JAAUPU01	s__
1012_0	2.61425e+06	public genome	1	1	0	0	nothing_new_here	p__Chloroflexota	c__Anaerolineae	o__Caldilineales	f__Caldilineaceae	g__Litorilinea	s__
38_0	2.74054e+06	public genome	1	1	0	0	nothing_new_here	p__Chloroflexota	c__Ktedonobacteria	o__Ktedonobacterales	f__Ktedonobacteraceae	g__DTNP01	s__
1122_1	2.80296e+06	public genome	1	1	0	0	nothing_new_here	p__Chloroflexota	c__Anaerolineae	o__UBA4142	f__UBA4142	g__CAIKBD01	s__
898_0	2.80296e+06	public genome	1	1	0	0	nothing_new_here	p__Chloroflexota	c__Anaerolineae	o__Anaerolineales	f__E44-bin32	g__	s__
732_0	2.80296e+06	public genome	1	1	0	0	nothing_new_here	p__Chloroflexota	c__Anaerolineae	o__Anaerolineales	f__UBA4823	g__CAIQJJ01	s__
587_1	2.86671e+06	public genome	1	1	0	0	nothing_new_here	p__Chloroflexota	c__Chloroflexia	o__Chloroflexales	f__Chloroflexaceae	g__Oscillochloris	s__
940_1	3300000866_7	public genome	2	1	1	0	old+new_onlyMAGsSRA	p__Chloroflexota	c__Anaerolineae	o__	f__	g__	s__
439_5	3300001683_28	public genome	1	1	0	0	nothing_new_here	p__Chloroflexota	c__Dehalococcoidia	o__UBA3495	f__UBA3495	g__UBA9611	s__
248_0	3300002462_35	public genome	1	1	0	0	nothing_new_here	p__Chloroflexota	c__Dehalococcoidia	o__Dehalococcoidales	f__UBA5627	g__	s__
17_1	3300002821_50	public genome	2	2	0	0	nothing_new_here	p__Chloroflexota	c__Dehalococcoidia	o__UBA2247	f__UBA2247	g__UBA2247	s__UBA2247 sp002347295
938_1	3300005274_9	public genome	3	3	0	0	nothing_new_here	p__Chloroflexota	c__Chloroflexia	o__Thermobaculales	f__Thermobaculaceae	g__Thermobaculum	s__Thermobaculum terrenum
1014_0	3300005286_12	public genome	1	1	0	0	nothing_new_here	p__Chloroflexota	c__Chloroflexia	o__Chloroflexales	f__	g__	s__
939_1	3300005298_10	public genome	2	2	0	0	nothing_new_here	p__Chloroflexota	c__Anaerolineae	o__	f__	g__	s__
1112_1	3300005529_35	public genome	1	1	0	0	nothing_new_here	p__Chloroflexota	c__Anaerolineae	o__UBA4142	f__UBA4142	g__	s__
858_0	3300005529_73	public genome	1	1	0	0	nothing_new_here	p__Chloroflexota	c__Anaerolineae	o__Anaerolineales	f__envOPS12	g__Fen-1038	s__
453_1	3300005613_29	public genome	1	1	0	0	nothing_new_here	p__Chloroflexota	c__Dehalococcoidia	o__	f__	g__	s__
410_0	3300005858_26	public genome	1	1	0	0	nothing_new_here	p__Chloroflexota	c__Dehalococcoidia	o__UBA1127	f__HRBIN23	g__HRBIN23	s__
821_1	3300005962_1	public genome	4	3	1	0	mostly_old	p__Chloroflexota	c__Anaerolineae	o__Anaerolineales	f__envOPS12	g__	s__
84_0	3300005985_20	public genome	1	1	0	0	nothing_new_here	p__Chloroflexota	c__Anaerolineae	o__Anaerolineales	f__envOPS12	g__UBA12294	s__
476_1	3300006315_3	public genome	2	2	0	0	nothing_new_here	p__Chloroflexota	c__Dehalococcoidia	o__SAR202	f__UBA826	g__GCA-002712965	s__
993_0	3300007771_9	public genome	1	1	0	0	nothing_new_here	p__Chloroflexota	c__Anaerolineae	o__Anaerolineales	f__envOPS12	g__	s__
631_0	3300009083_71	public genome	1	1	0	0	nothing_new_here	p__Chloroflexota_A	c__Ellin6529	o__CSP1-4	f__CSP1-4	g__Palsa-1032	s__
873_1	3300009083_98	public genome	1	1	0	0	nothing_new_here	p__Chloroflexota	c__Anaerolineae	o__Anaerolineales	f__envOPS12	g__OLB14	s__
802_0	3300009084_65	public genome	1	1	0	0	nothing_new_here	p__Chloroflexota	c__Chloroflexia	o__Thermomicrobiales	f__UBA6265	g__	s__
723_1	3300009084_78	public genome	1	1	0	0	nothing_new_here	p__Chloroflexota	c__Anaerolineae	o__SBR1031	f__A4b	g__OLB13	s__
411_2	3300009503_98	public genome	2	1	1	0	old+new_onlyMAGsSRA	p__Chloroflexota	c__Dehalococcoidia	o__Dehalococcoidales	f__UBA3254	g__UBA3254	s__
271_0	3300009773_24	public genome	1	1	0	0	nothing_new_here	p__Chloroflexota	c__Anaerolineae	o__UBA1429	f__UBA1429	g__	s__
1073_3	3300010271_5	public genome	1	1	0	0	nothing_new_here	p__Chloroflexota	c__Anaerolineae	o__SBR1031	f__UBA2029	g__	s__
967_1	3300011965_1	public genome	2	1	1	0	old+new_onlyMAGsSRA	p__Chloroflexota	c__Anaerolineae	o__SBR1031	f__UBA2029	g__UBA2029	s__UBA2029 sp002332795
640_1	3300012004_1	public genome	1	1	0	0	nothing_new_here	p__Chloroflexota_A	c__Ellin6529	o__CSP1-4	f__CSP1-4	g__UBA5189	s__UBA5189 sp002413045
582_0	3300012044_7	public genome	1	1	0	0	nothing_new_here	p__Chloroflexota	c__Chloroflexia	o__Chloroflexales	f__Chloroflexaceae	g__	s__
879_3	3300012533_44	public genome	1	1	0	0	nothing_new_here	p__Chloroflexota	c__Anaerolineae	o__Anaerolineales	f__envOPS12	g__UBA12294	s__
550_0	3300012682_11	public genome	1	1	0	0	nothing_new_here	p__Chloroflexota	c__UBA2235	o__UBA12225	f__UBA12225	g__	s__
1049_0	3300012956_49	public genome	1	1	0	0	nothing_new_here	p__Chloroflexota	c__Anaerolineae	o__Thermoflexales	f__	g__	s__
875_3	3300013126_12	public genome	1	1	0	0	nothing_new_here	p__Chloroflexota	c__Anaerolineae	o__Anaerolineales	f__envOPS12	g__OLB14	s__
1206_1	3300013126_122	public genome	3	3	0	0	nothing_new_here	p__Chloroflexota_A	c__Ellin6529	o__CSP1-4	f__UBA10416	g__UBA10416	s__
861_1	3300013126_24	public genome	1	1	0	0	nothing_new_here	p__Chloroflexota	c__Anaerolineae	o__Anaerolineales	f__envOPS12	g__OLB14	s__
718_0	3300013132_47	public genome	1	1	0	0	nothing_new_here	p__Chloroflexota	c__Chloroflexia	o__Chloroflexales	f__Roseiflexaceae	g__UBA965	s__
1079_0	3300013137_12	public genome	1	1	0	0	nothing_new_here	p__Chloroflexota	c__Anaerolineae	o__UBA3071	f__CG2-30-64-16	g__	s__
862_0	3300013137_35	public genome	1	1	0	0	nothing_new_here	p__Chloroflexota	c__Anaerolineae	o__Anaerolineales	f__envOPS12	g__OLB14	s__
281_0	3300013137_80	public genome	1	1	0	0	nothing_new_here	p__Chloroflexota	c__Dehalococcoidia	o__Dehalococcoidales	f__UBA3254	g__	s__
865_0	3300013138_53	public genome	1	1	0	0	nothing_new_here	p__Chloroflexota	c__Anaerolineae	o__Anaerolineales	f__envOPS12	g__OLB14	s__
882_1	3300013502_6	public genome	2	1	1	0	old+new_onlyMAGsSRA	p__Chloroflexota	c__Anaerolineae	o__Anaerolineales	f__envOPS12	g__OLB14	s__OLB14 sp002343775
1203_1	3300013829_7	public genome	1	1	0	0	nothing_new_here	p__Chloroflexota	c__Anaerolineae	o__Anaerolineales	f__Anaerolineaceae	g__T78	s__T78 sp002432795
770_0	3300013886_3	public genome	1	1	0	0	nothing_new_here	p__Chloroflexota	c__Anaerolineae	o__Anaerolineales	f__Anaerolineaceae	g__Brevefilum	s__
580_2	3300014149_4	public genome	1	1	0	0	nothing_new_here	p__Chloroflexota	c__Chloroflexia	o__Chloroflexales	f__Roseiflexaceae	g__Roseiflexus	s__
561_0	3300014149_7	public genome	1	1	0	0	nothing_new_here	p__Chloroflexota	c__Anaerolineae	o__UBA4142	f__	g__	s__
1123_0	3300014686_1	public genome	1	1	0	0	nothing_new_here	p__Chloroflexota	c__Anaerolineae	o__UBA4142	f__UBA4142	g__UBA4142	s__UBA4142 sp002400365
201_1	3300015199_8	public genome	1	1	0	0	nothing_new_here	p__Chloroflexota_A	c__Ellin6529	o__P2-11E	f__P2-11E	g__UBA4735	s__
955_0	3300015202_3	public genome	1	1	0	0	nothing_new_here	p__Chloroflexota	c__Anaerolineae	o__SBR1031	f__UBA2796	g__	s__
939_3	3300017406_11	public genome	1	1	0	0	nothing_new_here	p__Chloroflexota	c__Anaerolineae	o__	f__	g__	s__
242_1	3300017419_10	public genome	2	1	1	0	old+new_onlyMAGsSRA	p__Chloroflexota	c__Anaerolineae	o__4572-78	f__NAK82	g__NAK82	s__
352_1	3300017419_30	public genome	2	1	1	0	old+new_onlyMAGsSRA	p__Chloroflexota	c__Dehalococcoidia	o__GIF9	f__AB-539-J10	g__RBG-13-51-36	s__
1017_1	3300017419_4	public genome	3	1	2	0	old+new_onlyMAGsSRA	p__Chloroflexota	c__Anaerolineae	o__Caldilineales	f__Caldilineaceae	g__Caldilinea	s__
574_1	3300017419_5	public genome	2	1	1	0	old+new_onlyMAGsSRA	p__Chloroflexota	c__Chloroflexia	o__Chloroflexales	f__Chloroflexaceae	g__Chloroflexus	s__
921_1	3300017419_9	public genome	2	1	1	0	old+new_onlyMAGsSRA	p__Chloroflexota	c__Anaerolineae	o__	f__	g__	s__
1069_0	3300017426_18	public genome	1	1	0	0	nothing_new_here	p__Chloroflexota	c__Chloroflexia	o__	f__	g__	s__
662_4	3300017426_29	public genome	1	1	0	0	nothing_new_here	p__Dormibacterota	c__Dormibacteria	o__Dormibacterales	f__Dormibacteraceae	g__40CM-4-65-16	s__
691_1	3300017426_34	public genome	1	1	0	0	nothing_new_here	p__Dormibacterota	c__Dormibacteria	o__UBA8260	f__Bog-877	g__Bog-877	s__
1015_0	3300017426_8	public genome	1	1	0	0	nothing_new_here	p__Chloroflexota	c__UBA4733	o__UBA4733	f__UBA4733	g__	s__
365_0	3300017431_37	public genome	1	1	0	0	nothing_new_here	p__Chloroflexota	c__Dehalococcoidia	o__GIF9	f__AB-539-J10	g__RBG-13-51-36	s__
366_0	3300017431_42	public genome	1	1	0	0	nothing_new_here	p__Chloroflexota	c__Dehalococcoidia	o__GIF9	f__AB-539-J10	g__RBG-13-51-36	s__
881_1	3300017444_35	public genome	2	1	1	0	old+new_onlyMAGsSRA	p__Chloroflexota	c__Anaerolineae	o__Anaerolineales	f__envOPS12	g__UBA12294	s__
533_1	3300017444_37	public genome	2	1	1	0	old+new_onlyMAGsSRA	p__Chloroflexota	c__Dehalococcoidia	o__UBA2991	f__UBA2991	g__G233	s__
1011_1	3300017444_8	public genome	2	1	1	0	old+new_onlyMAGsSRA	p__Chloroflexota	c__Anaerolineae	o__4572-78	f__	g__	s__
945_0	3300017452_7	public genome	1	1	0	0	nothing_new_here	p__Chloroflexota	c__Anaerolineae	o__	f__	g__	s__
776_0	3300017480_17	public genome	1	1	0	0	nothing_new_here	p__Chloroflexota	c__Chloroflexia	o__54-19	f__QHBQ01	g__	s__
343_0	3300017498_17	public genome	1	1	0	0	nothing_new_here	p__Chloroflexota	c__Dehalococcoidia	o__GIF9	f__UBA5629	g__UBA1162	s__
277_0	3300017509_5	public genome	1	1	0	0	nothing_new_here	p__Chloroflexota	c__Chloroflexia	o__54-19	f__54-19	g__	s__
394_0	3300017989_46	public genome	1	1	0	0	nothing_new_here	p__Chloroflexota	c__Dehalococcoidia	o__SZUA-161	f__	g__	s__
99_0	3300018910_5	public genome	1	1	0	0	nothing_new_here	p__Chloroflexota	c__Chloroflexia	o__Chloroflexales	f__Herpetosiphonaceae	g__JKG1	s__
57_0	3300018910_6	public genome	1	1	0	0	nothing_new_here	p__Chloroflexota	c__Chloroflexia	o__54-19	f__	g__	s__
450_0	3300019487_22	public genome	1	1	0	0	nothing_new_here	p__Chloroflexota	c__Dehalococcoidia	o__UBA1151	f__	g__	s__
378_0	3300020109_66	public genome	1	1	0	0	nothing_new_here	p__Chloroflexota	c__Dehalococcoidia	o__UBA2777	f__RBG-13-53-26	g__RBG-13-53-26	s__
407_1	3300020139_24	public genome	2	1	1	0	old+new_onlyMAGsSRA	p__Chloroflexota	c__Dehalococcoidia	o__UBA2991	f__UBA2991	g__HRBIN29	s__HRBIN29 sp002898215
408_1	3300020139_32	public genome	2	1	1	0	old+new_onlyMAGsSRA	p__Chloroflexota	c__Dehalococcoidia	o__SM23-28-2	f__HRbin24	g__HRBIN24	s__
1034_1	3300020153_15	public genome	2	1	1	0	old+new_onlyMAGsSRA	p__Chloroflexota	c__Anaerolineae	o__Caldilineales	f__	g__	s__
803_1	3300020186_12	public genome	3	1	2	0	old+new_onlyMAGsSRA	p__Chloroflexota	c__Anaerolineae	o__Anaerolineales	f__UBA6663	g__	s__
485_1	3300020197_37	public genome	1	1	0	0	nothing_new_here	p__Chloroflexota	c__Dehalococcoidia	o__UBA3495	f__UBA3495	g__	s__
920_0	3300020214_33	public genome	1	1	0	0	nothing_new_here	p__Chloroflexota	c__Dehalococcoidia	o__UBA3495	f__GCA-2712585	g__	s__
490_0	3300020214_35	public genome	1	1	0	0	nothing_new_here	p__Chloroflexota	c__Dehalococcoidia	o__	f__	g__	s__
1122_2	3300020222_28	public genome	1	1	0	0	nothing_new_here	p__Chloroflexota	c__Anaerolineae	o__UBA4142	f__UBA4142	g__UBA4142	s__
295_1	3300020423_58	public genome	2	2	0	0	nothing_new_here	p__Chloroflexota	c__Dehalococcoidia	o__Dehalococcoidales	f__UBA2162	g__UBA2162	s__UBA2162 sp002335405
497_0	3300020467_17	public genome	1	1	0	0	nothing_new_here	p__Chloroflexota	c__Anaerolineae	o__Anaerolineales	f__UBA11657	g__UBA11657	s__UBA11657 sp002296125
80_0	3300021341_8	public genome	1	1	0	0	nothing_new_here	p__Chloroflexota	c__Anaerolineae	o__SBR1031	f__A4b	g__GCA-2699585	s__
827_3	3300021517_12	public genome	1	1	0	0	nothing_new_here	p__Chloroflexota	c__Anaerolineae	o__Anaerolineales	f__envOPS12	g__OLB14	s__
765_1	3300022177_37	public genome	2	1	1	0	old+new_onlyMAGsSRA	p__Chloroflexota	c__Anaerolineae	o__Anaerolineales	f__Anaerolineaceae	g__49-20	s__
1203_2	3300022181_37	public genome	1	1	0	0	nothing_new_here	p__Chloroflexota	c__Anaerolineae	o__Anaerolineales	f__Anaerolineaceae	g__T78	s__T78 sp002432795
251_0	3300022225_35	public genome	1	1	0	0	nothing_new_here	p__Chloroflexota	c__Dehalococcoidia	o__SZUA-161	f__	g__	s__
717_3	3300022752_27	public genome	1	1	0	0	nothing_new_here	p__Chloroflexota	c__Chloroflexia	o__Chloroflexales	f__Roseiflexaceae	g__UBA965	s__
395_0	3300022916_16	public genome	1	1	0	0	nothing_new_here	p__Chloroflexota	c__Dehalococcoidia	o__SZUA-161	f__	g__	s__
1142_0	3300023176_30	public genome	1	1	0	0	nothing_new_here	p__Chloroflexota	c__Dehalococcoidia	o__UBA1151	f__Bin127	g__	s__
1040_1	3300023208_13	public genome	1	1	0	0	nothing_new_here	p__Chloroflexota	c__Anaerolineae	o__Anaerolineales	f__UBA11657	g__	s__
757_0	3300024259_11	public genome	1	1	0	0	nothing_new_here	p__Chloroflexota	c__Anaerolineae	o__Anaerolineales	f__UBA11858	g__	s__
320_1	3300024262_27	public genome	2	2	0	0	nothing_new_here	p__Chloroflexota	c__Dehalococcoidia	o__Dehalococcoidales	f__UBA5760	g__	s__
338_3	3300024333_14	public genome	1	1	0	0	nothing_new_here	p__Chloroflexota	c__Dehalococcoidia	o__GIF9	f__UBA5620	g__9FT-COMBO-48-23	s__
930_1	3300024353_34	public genome	1	1	0	0	nothing_new_here	p__Chloroflexota	c__Anaerolineae	o__UBA7937	f__UBA7937	g__UBA7937	s__
472_1	3300024353_43	public genome	1	1	0	0	nothing_new_here	p__Chloroflexota	c__Dehalococcoidia	o__	f__	g__	s__
353_3	3300024353_49	public genome	1	1	0	0	nothing_new_here	p__Chloroflexota	c__Dehalococcoidia	o__GIF9	f__AB-539-J10	g__RBG-13-51-36	s__
855_1	3300025161_40	public genome	2	1	1	0	old+new_onlyMAGsSRA	p__Chloroflexota	c__Anaerolineae	o__Anaerolineales	f__envOPS12	g__	s__
408_2	3300025350_18	public genome	1	1	0	0	nothing_new_here	p__Chloroflexota	c__Dehalococcoidia	o__SM23-28-2	f__HRbin24	g__HRBIN24	s__
587_6	3300025455_1	public genome	1	1	0	0	nothing_new_here	p__Chloroflexota	c__Chloroflexia	o__Chloroflexales	f__Chloroflexaceae	g__Oscillochloris	s__
823_0	3300025477_8	public genome	1	1	0	0	nothing_new_here	p__Chloroflexota	c__Anaerolineae	o__Anaerolineales	f__RBG-16-64-43	g__	s__
1223_0	3300025503_35	public genome	1	1	0	0	nothing_new_here	p__Dormibacterota	c__Dormibacteria	o__Dormibacterales	f__	g__	s__
615_0	3300025503_4	public genome	1	1	0	0	nothing_new_here	p__Chloroflexota	c__UBA6077	o__	f__	g__	s__
846_2	3300025525_6	public genome	1	1	0	0	nothing_new_here	p__Chloroflexota	c__Anaerolineae	o__Anaerolineales	f__envOPS12	g__UBA8950	s__
1076_0	3300025571_8	public genome	1	1	0	0	nothing_new_here	p__Chloroflexota	c__Chloroflexia	o__Chloroflexales	f__Roseiflexaceae	g__Kouleothrix	s__
894_1	3300025597_6	public genome	3	2	1	0	old+new_onlyMAGsSRA	p__Chloroflexota	c__Anaerolineae	o__	f__	g__	s__
507_4	3300025649_3	public genome	1	1	0	0	nothing_new_here	p__Chloroflexota	c__Anaerolineae	o__	f__	g__	s__
666_1	3300025664_15	public genome	2	2	0	0	nothing_new_here	p__Dormibacterota	c__Dormibacteria	o__Dormibacterales	f__Dormibacteraceae	g__Palsa-872	s__Palsa-872 sp003139695
747_0	3300025702_24	public genome	1	1	0	0	nothing_new_here	p__Chloroflexota	c__Anaerolineae	o__Anaerolineales	f__Anaerolineaceae	g__Flexilinea	s__
894_2	3300025708_15	public genome	1	1	0	0	nothing_new_here	p__Chloroflexota	c__Anaerolineae	o__	f__	g__	s__
830_1	3300025716_7	public genome	1	1	0	0	nothing_new_here	p__Chloroflexota	c__Anaerolineae	o__Anaerolineales	f__envOPS12	g__UBA877	s__
568_1	3300025717_5	public genome	2	1	1	0	old+new_onlyMAGsSRA	p__Chloroflexota	c__Chloroflexia	o__Chloroflexales	f__Chloroflexaceae	g__	s__
1093_5	3300025720_1	public genome	1	1	0	0	nothing_new_here	p__Chloroflexota	c__Anaerolineae	o__	f__	g__	s__
1093_8	3300025720_6	public genome	1	1	0	0	nothing_new_here	p__Chloroflexota	c__Anaerolineae	o__	f__	g__	s__
895_0	3300025724_5	public genome	1	1	0	0	nothing_new_here	p__Chloroflexota	c__Anaerolineae	o__	f__	g__	s__
685_1	3300025775_3	public genome	2	1	1	0	old+new_onlyMAGsSRA	p__Chloroflexota	c__UBA2235	o__	f__	g__	s__
637_0	3300025812_11	public genome	1	1	0	0	nothing_new_here	p__Chloroflexota_A	c__Ellin6529	o__CSP1-4	f__CSP1-4	g__Fen-1039	s__
342_1	3300025812_16	public genome	1	1	0	0	nothing_new_here	p__Chloroflexota	c__Dehalococcoidia	o__GIF9	f__UBA5629	g__UBA1162	s__UBA1162 sp002311135
1209_0	3300025846_15	public genome	1	1	0	0	nothing_new_here	p__Chloroflexota	c__Anaerolineae	o__Anaerolineales	f__Anaerolineaceae	g__T78	s__
800_0	3300025854_1	public genome	1	1	0	0	nothing_new_here	p__Chloroflexota	c__Chloroflexia	o__Thermomicrobiales	f__UBA6265	g__	s__
298_1	3300025857_11	public genome	2	2	0	0	nothing_new_here	p__Chloroflexota	c__UBA6077	o__UBA6077	f__UBA6077	g__	s__
879_2	3300025859_13	public genome	1	1	0	0	nothing_new_here	p__Chloroflexota	c__Anaerolineae	o__Anaerolineales	f__envOPS12	g__UBA12294	s__
929_0	3300025861_10	public genome	1	1	0	0	nothing_new_here	p__Chloroflexota	c__Anaerolineae	o__	f__	g__	s__
1042_1	3300025861_8	public genome	1	1	0	0	nothing_new_here	p__Chloroflexota	c__Anaerolineae	o__	f__	g__	s__
750_0	3300025882_14	public genome	1	1	0	0	nothing_new_here	p__Chloroflexota	c__Anaerolineae	o__Anaerolineales	f__Anaerolineaceae	g__UBA700	s__
18_0	3300026007_2	public genome	1	1	0	0	nothing_new_here	p__Chloroflexota	c__Anaerolineae	o__4572-78	f__	g__	s__
1138_1	3300026087_6	public genome	2	2	0	0	nothing_new_here	p__Chloroflexota	c__Dehalococcoidia	o__SAR202	f__UBA11138	g__UBA1123	s__UBA1123 sp002313895
441_1	3300026108_2	public genome	1	1	0	0	nothing_new_here	p__Chloroflexota	c__Dehalococcoidia	o__UBA3495	f__UBA3495	g__UBA11650	s__UBA11650 sp002401285
854_0	3300026278_9	public genome	1	1	0	0	nothing_new_here	p__Chloroflexota	c__Anaerolineae	o__Anaerolineales	f__UBA6092	g__	s__
697_1	3300026291_14	public genome	2	2	0	0	nothing_new_here	p__Dormibacterota	c__Dormibacteria	o__UBA8260	f__UBA8260	g__Palsa-875	s__
515_1	3300026293_8	public genome	2	1	1	0	old+new_onlyMAGsSRA	p__Chloroflexota	c__Anaerolineae	o__	f__	g__	s__
48_1	3300026294_5	public genome	1	1	0	0	nothing_new_here	p__Chloroflexota	c__Ktedonobacteria	o__Ktedonobacterales	f__Ktedonobacteraceae	g__	s__
1042_3	3300026516_16	public genome	1	1	0	0	nothing_new_here	p__Chloroflexota	c__Anaerolineae	o__UBA3071	f__	g__	s__
1047_1	3300026519_14	public genome	1	1	0	0	nothing_new_here	p__Chloroflexota	c__Anaerolineae	o__Caldilineales	f__Caldilineaceae	g__	s__
328_1	3300026519_21	public genome	1	1	0	0	nothing_new_here	p__Chloroflexota	c__Anaerolineae	o__Ardenticatenales	f__Ardenticatenaceae	g__	s__
1047_2	3300026534_11	public genome	1	1	0	0	nothing_new_here	p__Chloroflexota	c__Anaerolineae	o__Caldilineales	f__Caldilineaceae	g__	s__
318_0	3300027051_22	public genome	1	1	0	0	nothing_new_here	p__Chloroflexota	c__Dehalococcoidia	o__Dehalococcoidales	f__RBG-16-60-22	g__	s__
681_1	3300027316_2	public genome	2	1	1	0	old+new_onlyMAGsSRA	p__Chloroflexota	c__Chloroflexia	o__Thermomicrobiales	f__Thermomicrobiaceae	g__Sphaerobacter	s__
1013_0	3300027509_6	public genome	1	1	0	0	nothing_new_here	p__Chloroflexota	c__Anaerolineae	o__Caldilineales	f__Caldilineaceae	g__	s__
510_1	3300027515_19	public genome	2	1	1	0	old+new_onlyMAGsSRA	p__Chloroflexota	c__Anaerolineae	o__	f__	g__	s__
1121_2	3300027515_21	public genome	2	1	1	0	old+new_onlyMAGsSRA	p__Chloroflexota	c__Anaerolineae	o__UBA4142	f__UBA4142	g__	s__
521_5	3300027532_23	public genome	2	1	1	0	old+new_onlyMAGsSRA	p__Chloroflexota	c__Dehalococcoidia	o__Bin125	f__Bin125	g__Bin125	s__Bin125 sp002239025
1214_0	3300027592_58	public genome	1	1	0	0	nothing_new_here	p__Chloroflexota	c__Dehalococcoidia	o__Dehalococcoidales	f__UBA5627	g__	s__
825_0	3300027607_19	public genome	1	1	0	0	nothing_new_here	p__Chloroflexota	c__Anaerolineae	o__SBR1031	f__	g__	s__
668_1	3300027645_7	public genome	1	1	0	0	nothing_new_here	p__Dormibacterota	c__Dormibacteria	o__Dormibacterales	f__Dormibacteraceae	g__UBA10449	s__
439_1	3300027677_4	public genome	1	1	0	0	nothing_new_here	p__Chloroflexota	c__Dehalococcoidia	o__UBA3495	f__UBA3495	g__UBA9611	s__
721_0	3300027690_53	public genome	1	1	0	0	nothing_new_here	p__Chloroflexota	c__Anaerolineae	o__Anaerolineales	f__UBA11579	g__	s__
353_1	3300027690_70	public genome	1	1	0	0	nothing_new_here	p__Chloroflexota	c__Dehalococcoidia	o__GIF9	f__AB-539-J10	g__RBG-13-51-36	s__
479_1	3300027709_15	public genome	2	2	0	0	nothing_new_here	p__Chloroflexota	c__Dehalococcoidia	o__SAR202	f__UBA826	g__UBA11996	s__UBA11996 sp002500485
930_2	3300027742_28	public genome	1	1	0	0	nothing_new_here	p__Chloroflexota	c__Anaerolineae	o__UBA7937	f__UBA7937	g__UBA7937	s__UBA7937 sp002366595
473_1	3300027760_13	public genome	8	7	1	0	mostly_old	p__Chloroflexota	c__UBA2235	o__UBA12225	f__UBA12225	g__UBA12225	s__UBA12225 sp002347925
918_0	3300027773_21	public genome	1	1	0	0	nothing_new_here	p__Chloroflexota	c__UBA5177	o__	f__	g__	s__
1065_0	3300027773_37	public genome	1	1	0	0	nothing_new_here	p__Chloroflexota	c__UBA5177	o__UBA5177	f__	g__	s__
354_0	3300027814_16	public genome	1	1	0	0	nothing_new_here	p__Chloroflexota	c__Dehalococcoidia	o__GIF9	f__AB-539-J10	g__RBG-13-51-36	s__
603_0	3300027815_20	public genome	1	1	0	0	nothing_new_here	p__Chloroflexota	c__Dehalococcoidia	o__	f__	g__	s__
445_0	3300027819_23	public genome	1	1	0	0	nothing_new_here	p__Chloroflexota	c__Dehalococcoidia	o__	f__	g__	s__
253_0	3300027819_31	public genome	1	1	0	0	nothing_new_here	p__Chloroflexota	c__Dehalococcoidia	o__GIF9	f__	g__	s__
457_0	3300027819_33	public genome	1	1	0	0	nothing_new_here	p__Chloroflexota	c__Dehalococcoidia	o__	f__	g__	s__
876_1	3300027819_37	public genome	1	1	0	0	nothing_new_here	p__Chloroflexota	c__Anaerolineae	o__Anaerolineales	f__envOPS12	g__OLB14	s__
903_1	3300027819_39	public genome	1	1	0	0	nothing_new_here	p__Chloroflexota	c__Dehalococcoidia	o__UBA6952	f__	g__	s__
275_0	3300027819_40	public genome	1	1	0	0	nothing_new_here	p__Chloroflexota	c__Dehalococcoidia	o__JdFR-54	f__	g__	s__
282_0	3300027819_59	public genome	1	1	0	0	nothing_new_here	p__Chloroflexota	c__Dehalococcoidia	o__Dehalococcoidales	f__UBA2162	g__	s__
350_0	3300027822_67	public genome	1	1	0	0	nothing_new_here	p__Chloroflexota	c__Dehalococcoidia	o__UBA3088	f__UBA3088	g__UBA3088	s__UBA3088 sp002367275
860_0	3300027825_12	public genome	1	1	0	0	nothing_new_here	p__Chloroflexota	c__Anaerolineae	o__Anaerolineales	f__envOPS12	g__Fen-1038	s__
1060_0	3300027825_13	public genome	1	1	0	0	nothing_new_here	p__Chloroflexota	c__Anaerolineae	o__Anaerolineales	f__envOPS12	g__UBA877	s__
477_0	3300027839_39	public genome	1	1	0	0	nothing_new_here	p__Chloroflexota	c__Dehalococcoidia	o__SAR202	f__UBA11138	g__Casp-Chloro-G4	s__
392_1	3300027839_47	public genome	1	1	0	0	nothing_new_here	p__Chloroflexota	c__Dehalococcoidia	o__SAR202	f__	g__	s__
439_4	3300027844_27	public genome	1	1	0	0	nothing_new_here	p__Chloroflexota	c__Dehalococcoidia	o__UBA3495	f__UBA3495	g__UBA9611	s__
1140_0	3300027844_33	public genome	1	1	0	0	nothing_new_here	p__Chloroflexota	c__Dehalococcoidia	o__UBA1151	f__UBA1151	g__UBA1151	s__
462_1	3300027847_33	public genome	1	1	0	0	nothing_new_here	p__Chloroflexota	c__Dehalococcoidia	o__UBA1151	f__Bin127	g__	s__
479_4	3300027847_53	public genome	1	1	0	0	nothing_new_here	p__Chloroflexota	c__Dehalococcoidia	o__SAR202	f__UBA826	g__UBA11996	s__UBA11996 sp003228105
76_0	3300027847_70	public genome	1	1	0	0	nothing_new_here	p__Chloroflexota	c__Dehalococcoidia	o__UBA2991	f__UBA2991	g__UBA2991	s__
14_0	3300027847_85	public genome	1	1	0	0	nothing_new_here	p__Chloroflexota	c__Dehalococcoidia	o__UBA2985	f__UBA2985	g__	s__
377_1	3300027863_158	public genome	2	1	1	0	old+new_onlyMAGsSRA	p__Chloroflexota	c__Dehalococcoidia	o__GIF9	f__AB-539-J10	g__RBG-13-51-36	s__
872_2	3300027878_55	public genome	1	1	0	0	nothing_new_here	p__Chloroflexota	c__Anaerolineae	o__Anaerolineales	f__envOPS12	g__OLB14	s__
235_0	3300027896_43	public genome	1	1	0	0	nothing_new_here	p__Chloroflexota	c__Dehalococcoidia	o__Dehalococcoidales	f__UBA3254	g__	s__
830_3	3300027896_56	public genome	1	1	0	0	nothing_new_here	p__Chloroflexota	c__Anaerolineae	o__Anaerolineales	f__envOPS12	g__UBA877	s__
89_0	3300027968_36	public genome	1	1	0	0	nothing_new_here	p__Chloroflexota	c__Dehalococcoidia	o__UBA2991	f__	g__	s__
341_1	3300028178_12	public genome	2	2	0	0	nothing_new_here	p__Chloroflexota	c__Dehalococcoidia	o__GIF9	f__UBA5629	g__UBA1162	s__
508_1	3300028299_8	public genome	1	1	0	0	nothing_new_here	p__Chloroflexota	c__Anaerolineae	o__UBA7937	f__	g__	s__
1054_0	3300028398_23	public genome	1	1	0	0	nothing_new_here	p__Chloroflexota	c__Anaerolineae	o__Anaerolineales	f__	g__	s__
373_0	3300028603_106	public genome	1	1	0	0	nothing_new_here	p__Chloroflexota	c__Dehalococcoidia	o__Dehalococcoidales	f__UBA5627	g__UBA5627	s__
1041_2	3300029314_4	public genome	1	1	0	0	nothing_new_here	p__Chloroflexota	c__Anaerolineae	o__	f__	g__	s__
693_0	3300029442_11	public genome	1	1	0	0	nothing_new_here	p__Chloroflexota	c__Dehalococcoidia	o__Dehalococcoidales	f__UBA3254	g__UBA3254	s__
225_1	3300029893_16	public genome	2	1	1	0	old+new_onlyMAGsSRA	p__Chloroflexota	c__Dehalococcoidia	o__GIF9	f__	g__	s__
1220_0	3300029902_12	public genome	1	1	0	0	nothing_new_here	p__Chloroflexota	c__Ktedonobacteria	o__Ktedonobacterales	f__	g__	s__
616_0	A0_1	environmental sample	1	0	0	1	new_onlyMAGsSample	p__Chloroflexota	c__FW602-bin22	o__FW602-bin22	f__CADDYW01	g__CADDYW01	s__
35_0	A0_13	environmental sample	1	0	0	1	new_onlyMAGsSample	p__Chloroflexota	c__Ktedonobacteria	o__Ktedonobacterales	f__Ktedonobacteraceae	g__	s__
641_1	A0_19	environmental sample	2	0	1	1	new_MAGsSRA+Sample	p__Chloroflexota	c__Ellin6529	o__CSP1-4	f__CSP1-4	g__	s__
72_0	A0_21	environmental sample	1	0	0	1	new_onlyMAGsSample	p__Chloroflexota	c__Chloroflexia	o__Thermomicrobiales	f__	g__	s__
922_3	A0_25	environmental sample	1	0	0	1	new_onlyMAGsSample	p__Chloroflexota	c__Anaerolineae	o__Thermoflexales	f__Thermoflexaceae	g__Thermoflexus	s__
685_2	A0_26	environmental sample	1	0	0	1	new_onlyMAGsSample	p__Chloroflexota	c__UBA2235	o__SpSt-225	f__SpSt-225	g__SpSt-225	s__
689_1	A0_28	environmental sample	2	1	0	1	old+new_onlyMAGsSample	p__Chloroflexota	c__UBA6077	o__UBA6077	f__CF-72	g__	s__
403_1	A0_3	environmental sample	2	1	0	1	old+new_onlyMAGsSample	p__Chloroflexota	c__Chloroflexia	o__Thermomicrobiales	f__Thermomicrobiaceae	g__Thermomicrobium	s__Thermomicrobium sp002898975
896_4	A0_31	environmental sample	1	0	0	1	new_onlyMAGsSample	p__Chloroflexota	c__Dehalococcoidia	o__SpSt-223	f__SpSt-223	g__SpSt-223	s__
34_7	A0_34	environmental sample	1	0	0	1	new_onlyMAGsSample	p__Chloroflexota	c__Ktedonobacteria	o__Ktedonobacterales	f__Ktedonobacteraceae	g__Thermogemmatispora	s__
916_2	A0_35	environmental sample	1	0	0	1	new_onlyMAGsSample	p__Chloroflexota	c__Dehalococcoidia	o__DSGV01	f__DSGV01	g__DSGV01	s__
596_0	A0_36	environmental sample	1	0	0	1	new_onlyMAGsSample	p__Chloroflexota	c__Chloroflexia	o__Chloroflexales	f__Roseiflexaceae	g__	s__
645_2	A0_4	environmental sample	1	0	0	1	new_onlyMAGsSample	p__Chloroflexota	c__Ellin6529	o__CSP1-4	f__CSP1-4	g__CF-46	s__
805_0	A0_41	environmental sample	1	0	0	1	new_onlyMAGsSample	p__Chloroflexota	c__FW602-bin22	o__	f__	g__	s__
641_2	A0_42	environmental sample	1	0	0	1	new_onlyMAGsSample	p__Chloroflexota	c__Ellin6529	o__CSP1-4	f__CSP1-4	g__	s__
627_0	A0_45	environmental sample	1	0	0	1	new_onlyMAGsSample	p__Chloroflexota	c__Ellin6529	o__CSP1-4	f__CSP1-4	g__	s__
859_0	A0_6	environmental sample	1	0	0	1	new_onlyMAGsSample	p__Chloroflexota	c__Anaerolineae	o__Anaerolineales	f__EnvOPS12	g__Fen-1038	s__
938_2	A0_9	environmental sample	1	0	0	1	new_onlyMAGsSample	p__Chloroflexota	c__Chloroflexia	o__Thermobaculales	f__Thermobaculaceae	g__Thermobaculum	s__
50_0	B11_21	binning approach	1	0	1	0	new_onlyMAGsSRA	p__Chloroflexota	c__Ktedonobacteria	o__Ktedonobacterales	f__Ktedonobacteraceae	g__UBA11361	s__UBA11361 sp005880425
86_0	B14_40	binning approach	1	0	1	0	new_onlyMAGsSRA	p__Chloroflexota	c__Anaerolineae	o__Anaerolineales	f__UBA4823	g__	s__
684_0	B3_56	binning approach	1	0	1	0	new_onlyMAGsSRA	p__Chloroflexota	c__Chloroflexia	o__54-19	f__	g__	s__
48_2	B30_77	binning approach	1	0	1	0	new_onlyMAGsSRA	p__Chloroflexota	c__Ktedonobacteria	o__Ktedonobacterales	f__Ktedonobacteraceae	g__JACDAE01	s__
71_1	B32_95	binning approach	2	0	2	0	new_onlyMAGsSRA	p__Chloroflexota	c__Chloroflexia	o__Thermomicrobiales	f__	g__	s__
39_0	B38_102	binning approach	1	0	1	0	new_onlyMAGsSRA	p__Chloroflexota	c__Ktedonobacteria	o__Ktedonobacterales	f__Ktedonobacteraceae	g__CF-113	s__
665_0	B61_133	binning approach	1	0	1	0	new_onlyMAGsSRA	p__Dormibacterota	c__Dormibacteria	o__Dormibacterales	f__Dormibacteraceae	g__40CM-4-65-16	s__
670_0	B61_138	binning approach	1	0	1	0	new_onlyMAGsSRA	p__Dormibacterota	c__Dormibacteria	o__Dormibacterales	f__Dormibacteraceae	g__CF-118	s__
612_0	B73_147	binning approach	1	0	1	0	new_onlyMAGsSRA	p__Chloroflexota	c__UBA2235	o__UBA12225	f__	g__	s__
36_0	B93_191	binning approach	1	0	1	0	new_onlyMAGsSRA	p__Chloroflexota	c__Ktedonobacteria	o__Ktedonobacterales	f__Ktedonobacteraceae	g__CF-113	s__
45_0	B93_193	binning approach	1	0	1	0	new_onlyMAGsSRA	p__Chloroflexota	c__Ktedonobacteria	o__Ktedonobacterales	f__Ktedonobacteraceae	g__DTNP01	s__
37_0	B93_195	binning approach	1	0	1	0	new_onlyMAGsSRA	p__Chloroflexota	c__Ktedonobacteria	o__Ktedonobacterales	f__Ktedonobacteraceae	g__CF-113	s__
923_0	C0_11	environmental sample	1	0	0	1	new_onlyMAGsSample	p__Chloroflexota	c__Anaerolineae	o__Thermoflexales	f__Thermoflexaceae	g__Thermoflexus	s__
226_0	C0_12	environmental sample	1	0	0	1	new_onlyMAGsSample	p__Chloroflexota	c__Dehalococcoidia	o__GIF9	f__	g__	s__
942_0	C0_2	environmental sample	1	0	0	1	new_onlyMAGsSample	p__Chloroflexota	c__Anaerolineae	o__SpSt-600	f__SpSt-600	g__SpSt-600	s__
893_0	C0_8	environmental sample	1	0	0	1	new_onlyMAGsSample	p__Chloroflexota	c__Anaerolineae	o__Anaerolineales	f__EnvOPS12	g__UBA12294	s__
460_0	F11_11	binning approach	1	0	1	0	new_onlyMAGsSRA	p__Chloroflexota	c__Dehalococcoidia	o__UBA2991	f__UBA2991	g__PNKC01	s__
724_0	F11_12	binning approach	1	0	1	0	new_onlyMAGsSRA	p__Chloroflexota	c__Anaerolineae	o__SBR1031	f__A4b	g__OLB15	s__
953_1	F11_13	binning approach	2	1	1	0	old+new_onlyMAGsSRA	p__Chloroflexota	c__Anaerolineae	o__SBR1031	f__A4b	g__	s__
723_2	F11_4	binning approach	1	0	1	0	new_onlyMAGsSRA	p__Chloroflexota	c__Anaerolineae	o__SBR1031	f__A4b	g__OLB13	s__
714_1	F11_7	binning approach	2	1	1	0	old+new_onlyMAGsSRA	p__Chloroflexota	c__Anaerolineae	o__SBR1031	f__A4b	g__GCA-2699585	s__
227_0	F11_8	binning approach	1	0	1	0	new_onlyMAGsSRA	p__Chloroflexota	c__Anaerolineae	o__Caldilineales	f__Caldilineaceae	g__CFX5	s__
1088_0	F14_17	binning approach	1	0	1	0	new_onlyMAGsSRA	p__Chloroflexota	c__Anaerolineae	o__B4-G1	f__SLSP01	g__	s__
962_0	F14_20	binning approach	1	0	1	0	new_onlyMAGsSRA	p__Chloroflexota	c__Anaerolineae	o__SBR1031	f__A4b	g__J038	s__
52_0	F14_21	binning approach	1	0	1	0	new_onlyMAGsSRA	p__Chloroflexota	c__Anaerolineae	o__SBR1031	f__J027	g__J027	s__
840_0	F14_25	binning approach	1	0	1	0	new_onlyMAGsSRA	p__Chloroflexota	c__Anaerolineae	o__SBR1031	f__A4b	g__GCA-2699585	s__
66_0	F14_28	binning approach	1	0	1	0	new_onlyMAGsSRA	p__Chloroflexota	c__Anaerolineae	o__SBR1031	f__A4b	g__GCA-2699585	s__
518_1	F14_29	binning approach	1	0	1	0	new_onlyMAGsSRA	p__Chloroflexota	c__Anaerolineae	o__SBR1031	f__A4b	g__	s__
597_0	F14_30	binning approach	1	0	1	0	new_onlyMAGsSRA	p__Chloroflexota	c__Anaerolineae	o__SBR1031	f__A4b	g__CAIRDJ01	s__
960_0	F14_31	binning approach	1	0	1	0	new_onlyMAGsSRA	p__Chloroflexota	c__Anaerolineae	o__SBR1031	f__A4b	g__J038	s__
841_0	F17_39	binning approach	1	0	1	0	new_onlyMAGsSRA	p__Chloroflexota	c__Anaerolineae	o__SBR1031	f__A4b	g__CAIRDJ01	s__
519_0	F17_41	binning approach	1	0	1	0	new_onlyMAGsSRA	p__Chloroflexota	c__Anaerolineae	o__B4-G1	f__B4-G1	g__	s__
518_2	F17_42	binning approach	1	0	1	0	new_onlyMAGsSRA	p__Chloroflexota	c__Anaerolineae	o__B4-G1	f__B4-G1	g__DSAR01	s__
969_0	F17_43	binning approach	1	0	1	0	new_onlyMAGsSRA	p__Chloroflexota	c__Anaerolineae	o__SBR1031	f__UBA2029	g__TC-15	s__
1089_0	F17_45	binning approach	1	0	1	0	new_onlyMAGsSRA	p__Chloroflexota	c__Chloroflexia	o__Chloroflexales	f__Chloroflexaceae	g__JAAUSY01	s__
560_1	F17_46	binning approach	1	0	1	0	new_onlyMAGsSRA	p__Chloroflexota	c__Chloroflexia	o__Chloroflexales	f__Chloroflexaceae	g__JAAUSY01	s__
74_0	F17_48	binning approach	1	0	1	0	new_onlyMAGsSRA	p__Chloroflexota	c__Anaerolineae	o__Anaerolineales	f__Anaerolineaceae	g__	s__
1098_0	F17_49	binning approach	1	0	1	0	new_onlyMAGsSRA	p__Chloroflexota	c__Anaerolineae	o__B4-G1	f__SLSP01	g__G713	s__
568_2	F17_50	binning approach	1	0	1	0	new_onlyMAGsSRA	p__Chloroflexota	c__Chloroflexia	o__Chloroflexales	f__Chloroflexaceae	g__	s__
557_0	F17_55	binning approach	1	0	1	0	new_onlyMAGsSRA	p__Chloroflexota	c__Chloroflexia	o__Chloroflexales	f__Chloroflexaceae	g__	s__
552_0	F17_56	binning approach	1	0	1	0	new_onlyMAGsSRA	p__Chloroflexota	c__Chloroflexia	o__Chloroflexales	f__Chloroflexaceae	g__JAAUSY01	s__
67_0	F17_58	binning approach	1	0	1	0	new_onlyMAGsSRA	p__Chloroflexota	c__Anaerolineae	o__SBR1031	f__A4b	g__	s__
1071_1	F18_61	binning approach	2	1	1	0	old+new_onlyMAGsSRA	p__Chloroflexota	c__Anaerolineae	o__SBR1031	f__A4b	g__OLB15	s__
1070_1	F18_65	binning approach	2	1	1	0	old+new_onlyMAGsSRA	p__Chloroflexota	c__Anaerolineae	o__SBR1031	f__A4b	g__OLB15	s__
715_1	F18_66	binning approach	2	1	1	0	old+new_onlyMAGsSRA	p__Chloroflexota	c__Anaerolineae	o__SBR1031	f__A4b	g__GCA-2794515	s__
874_0	F2_69	binning approach	1	0	1	0	new_onlyMAGsSRA	p__Chloroflexota	c__Anaerolineae	o__Anaerolineales	f__EnvOPS12	g__OLB14	s__
1072_1	F20_72	binning approach	2	1	1	0	old+new_onlyMAGsSRA	p__Chloroflexota	c__Anaerolineae	o__SBR1031	f__A4b	g__OLB15	s__
83_0	F20_76	binning approach	1	0	1	0	new_onlyMAGsSRA	p__Chloroflexota	c__Anaerolineae	o__SBR1031	f__A4b	g__GCA-2699585	s__
1067_0	F20_78	binning approach	1	0	1	0	new_onlyMAGsSRA	p__Chloroflexota	c__Chloroflexia	o__Chloroflexales	f__Herpetosiphonaceae	g__JACCRK01	s__
63_1	F20_80	binning approach	2	1	1	0	old+new_onlyMAGsSRA	p__Chloroflexota	c__Chloroflexia	o__Chloroflexales	f__Roseiflexaceae	g__	s__
632_0	F3_87	binning approach	1	0	1	0	new_onlyMAGsSRA	p__Chloroflexota	c__Ellin6529	o__CSP1-4	f__CSP1-4	g__	s__
737_1	F3_92	binning approach	2	1	1	0	old+new_onlyMAGsSRA	p__Chloroflexota	c__Anaerolineae	o__SBR1031	f__UBA2796	g__UBA2796	s__UBA2796 sp002352035
1114_1	F3_93	binning approach	2	1	1	0	old+new_onlyMAGsSRA	p__Chloroflexota	c__Anaerolineae	o__UBA4142	f__SHND01	g__SHND01	s__
630_1	F3_94	binning approach	1	0	1	0	new_onlyMAGsSRA	p__Chloroflexota	c__Ellin6529	o__CSP1-4	f__CSP1-4	g__	s__
541_1	F3_95	binning approach	1	0	1	0	new_onlyMAGsSRA	p__Chloroflexota	c__Dehalococcoidia	o__UBA2991	f__UBA2991	g__UCB2	s__UCB2 sp003577245
315_1	F3_97	binning approach	1	0	1	0	new_onlyMAGsSRA	p__Chloroflexota	c__Anaerolineae	o__SBR1031	f__A4b	g__OLB15	s__
144_0	F5_108	binning approach	1	0	1	0	new_onlyMAGsSRA	p__Chloroflexota	c__Chloroflexia	o__Chloroflexales	f__Chloroflexaceae	g__UBA1466	s__UBA1466 sp002325605
568_3	F7_114	binning approach	1	0	1	0	new_onlyMAGsSRA	p__Chloroflexota	c__Chloroflexia	o__Chloroflexales	f__Chloroflexaceae	g__	s__
1097_1	F7_115	binning approach	1	0	1	0	new_onlyMAGsSRA	p__Chloroflexota	c__Anaerolineae	o__B4-G1	f__SLSP01	g__G713	s__
322_0	F7_116	binning approach	1	0	1	0	new_onlyMAGsSRA	p__Chloroflexota	c__Anaerolineae	o__SBR1031	f__J027	g__JAAUUD01	s__
580_1	GCA_000016665	public genome	3	3	0	0	nothing_new_here	p__Chloroflexota	c__Chloroflexia	o__Chloroflexales	f__Roseiflexaceae	g__Roseiflexus	s__Roseiflexus sp000016665
581_1	GCA_000017805	public genome	4	2	2	0	old+new_onlyMAGsSRA	p__Chloroflexota	c__Chloroflexia	o__Chloroflexales	f__Roseiflexaceae	g__Roseiflexus	s__Roseiflexus castenholzii
404_2	GCA_000021685	public genome	11	7	4	0	old+new_onlyMAGsSRA	p__Chloroflexota	c__Chloroflexia	o__Thermomicrobiales	f__Thermomicrobiaceae	g__Thermomicrobium	s__Thermomicrobium roseum
576_0	GCA_000021945	public genome	1	1	0	0	nothing_new_here	p__Chloroflexota	c__Chloroflexia	o__Chloroflexales	f__Chloroflexaceae	g__Chloroflexus	s__Chloroflexus aggregans
681_2	GCA_000024985	public genome	3	2	1	0	old+new_onlyMAGsSRA	p__Chloroflexota	c__Chloroflexia	o__Thermomicrobiales	f__Thermomicrobiaceae	g__Sphaerobacter	s__Sphaerobacter thermophilus
247_0	GCA_000143165	public genome	1	1	0	0	nothing_new_here	p__Chloroflexota	c__Dehalococcoidia	o__Dehalococcoidales	f__Dehalococcoidaceae	g__Dehalogenimonas	s__Dehalogenimonas lykanthroporepellens
571_1	GCA_000152145	public genome	1	1	0	0	nothing_new_here	p__Chloroflexota	c__Chloroflexia	o__Chloroflexales	f__Chloroflexaceae	g__Oscillochloris	s__Oscillochloris trichoides
1017_2	GCA_000281175	public genome	4	1	3	0	mostly_new_onlyMAGsSRA	p__Chloroflexota	c__Anaerolineae	o__Caldilineales	f__Caldilineaceae	g__Caldilinea	s__Caldilinea aerophila
548_0	GCA_000297255	public genome	1	1	0	0	nothing_new_here	p__Chloroflexota	c__Chloroflexia	o__Thermomicrobiales	f__Thermomicrobiaceae	g__Nitrolancea	s__Nitrolancea hollandica
577_1	GCA_000516515	public genome	3	2	1	0	old+new_onlyMAGsSRA	p__Chloroflexota	c__Chloroflexia	o__Chloroflexales	f__Chloroflexaceae	g__Chloroflexus	s__Chloroflexus sp000516515
34_6	GCA_000702505	public genome	1	1	0	0	nothing_new_here	p__Chloroflexota	c__Ktedonobacteria	o__Ktedonobacterales	f__Ktedonobacteraceae	g__Thermogemmatispora	s__Thermogemmatispora carboxidivorans
577_2	GCA_000735195	public genome	3	2	1	0	old+new_onlyMAGsSRA	p__Chloroflexota	c__Chloroflexia	o__Chloroflexales	f__Chloroflexaceae	g__Chloroflexus	s__Chloroflexus sp000735195
405_1	GCA_000744775	public genome	2	2	0	0	nothing_new_here	p__Chloroflexota	c__Chloroflexia	o__Thermomicrobiales	f__Thermomicrobiaceae	g__Thermorudis	s__Thermorudis peleae
244_0	GCA_001005265	public genome	1	1	0	0	nothing_new_here	p__Chloroflexota	c__Dehalococcoidia	o__Dehalococcoidales	f__Dehalococcoidaceae	g__Dehalogenimonas	s__Dehalogenimonas sp001005265
324_1	GCA_001050195	public genome	2	1	1	0	old+new_onlyMAGsSRA	p__Chloroflexota	c__Anaerolineae	o__Anaerolineales	f__Anaerolineaceae	g__Anaerolinea	s__Anaerolinea thermolimosa
739_1	GCA_001050215	public genome	2	1	1	0	old+new_onlyMAGsSRA	p__Chloroflexota	c__Anaerolineae	o__Anaerolineales	f__Anaerolineaceae	g__Bellilinea	s__Bellilinea caldifistulae
778_0	GCA_001050235	public genome	1	1	0	0	nothing_new_here	p__Chloroflexota	c__Anaerolineae	o__Anaerolineales	f__Anaerolineaceae	g__Longilinea	s__Longilinea arvoryzae
114_0	GCA_001050255	public genome	1	1	0	0	nothing_new_here	p__Chloroflexota	c__Anaerolineae	o__Anaerolineales	f__Anaerolineaceae	g__Levilinea	s__Levilinea saccharolytica
746_1	GCA_001192795	public genome	3	1	2	0	old+new_onlyMAGsSRA	p__Chloroflexota	c__Anaerolineae	o__Anaerolineales	f__Anaerolineaceae	g__Flexilinea	s__Flexilinea flocculi
103_0	GCA_001306095	public genome	1	1	0	0	nothing_new_here	p__Chloroflexota	c__Anaerolineae	o__Anaerolineales	f__Anaerolineaceae	g__Leptolinea	s__Leptolinea tardivitalis
135_1	GCA_001306115	public genome	1	1	0	0	nothing_new_here	p__Chloroflexota	c__Anaerolineae	o__Anaerolineales	f__Anaerolineaceae	g__Ornatilinea	s__Ornatilinea apprima
1106_1	GCA_001306135	public genome	1	1	0	0	nothing_new_here	p__Chloroflexota	c__Chloroflexia	o__Chloroflexales	f__Herpetosiphonaceae	g__Herpetosiphon	s__Herpetosiphon geysericola
327_1	GCA_001306175	public genome	1	1	0	0	nothing_new_here	p__Chloroflexota	c__Anaerolineae	o__Ardenticatenales	f__Ardenticatenaceae	g__Ardenticatena	s__Ardenticatena maritima
592_1	GCA_001399705	public genome	1	1	0	0	nothing_new_here	p__Chloroflexota	c__Chloroflexia	o__Chloroflexales	f__Roseiflexaceae	g__Kouleothrix	s__Kouleothrix aurantiaca
628_0	GCA_001443375	public genome	1	1	0	0	nothing_new_here	p__Chloroflexota	c__Ellin6529	o__CSP1-4	f__CSP1-4	g__CSP1-4	s__CSP1-4 sp001443375
246_2	GCA_001466665	public genome	1	1	0	0	nothing_new_here	p__Chloroflexota	c__Dehalococcoidia	o__Dehalococcoidales	f__Dehalococcoidaceae	g__Dehalogenimonas	s__Dehalogenimonas alkenigignens
316_0	GCA_001567085	public genome	1	1	0	0	nothing_new_here	p__Chloroflexota	c__Anaerolineae	o__SBR1031	f__A4b	g__OLB15	s__OLB15 sp001567085
827_5	GCA_001567105	public genome	1	1	0	0	nothing_new_here	p__Chloroflexota	c__Anaerolineae	o__Anaerolineales	f__EnvOPS12	g__OLB14	s__OLB14 sp001567105
575_1	GCA_001650695	public genome	1	1	0	0	nothing_new_here	p__Chloroflexota	c__Chloroflexia	o__Chloroflexales	f__Chloroflexaceae	g__Chloroflexus	s__Chloroflexus islandicus
629_0	GCA_001794945	public genome	1	1	0	0	nothing_new_here	p__Chloroflexota	c__Ellin6529	o__CSP1-4	f__CSP1-4	g__GWC2-73-18	s__GWC2-73-18 sp001794945
249_0	GCA_001796335	public genome	1	1	0	0	nothing_new_here	p__Chloroflexota	c__Anaerolineae	o__Anaerolineales	f__EnvOPS12	g__UBA12087	s__UBA12087 sp001796335
355_0	GCA_001796515	public genome	1	1	0	0	nothing_new_here	p__Chloroflexota	c__Dehalococcoidia	o__GIF9	f__AB-539-J10	g__RBG-13-51-36	s__RBG-13-51-36 sp001796515
1101_0	GCA_001872455	public genome	1	1	0	0	nothing_new_here	p__Chloroflexota	c__Anaerolineae	o__Anaerolineales	f__EnvOPS12	g__UBA8950	s__UBA8950 sp001872455
128_0	GCA_001899005	public genome	1	1	0	0	nothing_new_here	p__Chloroflexota	c__Anaerolineae	o__Anaerolineales	f__Anaerolineaceae	g__UBA6170	s__UBA6170 sp001899005
1063_1	GCA_002068935	public genome	1	1	0	0	nothing_new_here	p__Chloroflexota	c__Anaerolineae	o__CG2-30-64-16	f__CG2-30-64-16	g__MWBF01	s__MWBF01 sp002068935
143_0	GCA_002070215	public genome	1	1	0	0	nothing_new_here	p__Chloroflexota	c__Anaerolineae	o__UBA2200	f__UBA2200	g__UBA2200	s__UBA2200 sp002070215
385_1	GCA_002238445	public genome	2	1	1	0	old+new_onlyMAGsSRA	p__Chloroflexota	c__Anaerolineae	o__Caldilineales	f__Caldilineaceae	g__Bin5	s__Bin5 sp002238445
382_1	GCA_002238555	public genome	3	1	2	0	old+new_onlyMAGsSRA	p__Chloroflexota	c__Anaerolineae	o__Caldilineales	f__Bin34	g__Bin34	s__Bin34 sp002238555
418_1	GCA_002238825	public genome	2	1	1	0	old+new_onlyMAGsSRA	p__Chloroflexota	c__Dehalococcoidia	o__UBA3495	f__UBA3495	g__Bin87	s__Bin87 sp002238825
426_1	GCA_002238855	public genome	2	1	1	0	old+new_onlyMAGsSRA	p__Chloroflexota	c__Dehalococcoidia	o__SAR202	f__UBA11138	g__Bin90	s__Bin90 sp002238855
717_2	GCA_002292925	public genome	1	1	0	0	nothing_new_here	p__Chloroflexota	c__Chloroflexia	o__Chloroflexales	f__Roseiflexaceae	g__UBA965	s__UBA965 sp002292925
442_0	GCA_002311385	public genome	1	1	0	0	nothing_new_here	p__Chloroflexota	c__Dehalococcoidia	o__UBA3495	f__UBA3495	g__UBA1141	s__UBA1141 sp002311385
913_0	GCA_002328075	public genome	1	1	0	0	nothing_new_here	p__Chloroflexota	c__Anaerolineae	o__Promineofilales	f__UBA4811	g__UBA4811	s__UBA4811 sp002328075
269_0	GCA_002329325	public genome	1	1	0	0	nothing_new_here	p__Chloroflexota	c__Anaerolineae	o__UBA1429	f__UBA1429	g__UBA1429	s__UBA1429 sp002329325
827_4	GCA_002345215	public genome	1	1	0	0	nothing_new_here	p__Chloroflexota	c__Anaerolineae	o__Anaerolineales	f__EnvOPS12	g__OLB14	s__OLB14 sp002345215
349_1	GCA_002352365	public genome	2	2	0	0	nothing_new_here	p__Chloroflexota	c__Dehalococcoidia	o__UBA2777	f__UBA2777	g__UBA2777	s__UBA2777 sp002352365
293_0	GCA_002382615	public genome	1	1	0	0	nothing_new_here	p__Chloroflexota	c__Dehalococcoidia	o__Dehalococcoidales	f__Dehalococcoidaceae	g__UBA4087	s__UBA4087 sp002382615
761_1	GCA_002399085	public genome	1	1	0	0	nothing_new_here	p__Chloroflexota	c__Anaerolineae	o__Anaerolineales	f__Anaerolineaceae	g__T78	s__T78 sp002399085
201_2	GCA_002404035	public genome	1	1	0	0	nothing_new_here	p__Chloroflexota	c__Ellin6529	o__P2-11E	f__P2-11E	g__UBA4735	s__UBA4735 sp002404155
690_0	GCA_002404055	public genome	1	1	0	0	nothing_new_here	p__Chloroflexota	c__UBA4733	o__UBA4733	f__UBA4733	g__UBA4733	s__UBA4733 sp002404055
55_0	GCA_002412765	public genome	1	1	0	0	nothing_new_here	p__Chloroflexota	c__Anaerolineae	o__Anaerolineales	f__Anaerolineaceae	g__UBA5203	s__UBA5203 sp002412765
848_0	GCA_002412925	public genome	1	1	0	0	nothing_new_here	p__Chloroflexota	c__Anaerolineae	o__Anaerolineales	f__EnvOPS12	g__UBA5195	s__UBA5195 sp002412925
890_6	GCA_002418205	public genome	1	1	0	0	nothing_new_here	p__Chloroflexota	c__Anaerolineae	o__Anaerolineales	f__EnvOPS12	g__UBA12294	s__UBA12294 sp002418205
785_0	GCA_002418215	public genome	1	1	0	0	nothing_new_here	p__Chloroflexota	c__Anaerolineae	o__Anaerolineales	f__EnvOPS12	g__UBA5796	s__UBA5796 sp002418215
374_0	GCA_002419135	public genome	1	1	0	0	nothing_new_here	p__Chloroflexota	c__Dehalococcoidia	o__Dehalococcoidales	f__UBA5627	g__UBA5627	s__UBA5627 sp002419135
1201_1	GCA_002424315	public genome	2	2	0	0	nothing_new_here	p__Chloroflexota	c__Anaerolineae	o__Anaerolineales	f__Anaerolineaceae	g__T78	s__T78 sp002409625
110_0	GCA_002428455	public genome	1	1	0	0	nothing_new_here	p__Chloroflexota	c__Anaerolineae	o__Anaerolineales	f__Anaerolineaceae	g__UBA6107	s__UBA6107 sp002428455
751_0	GCA_002428565	public genome	1	1	0	0	nothing_new_here	p__Chloroflexota	c__Anaerolineae	o__Anaerolineales	f__UBA4823	g__UBA6092	s__UBA6092 sp002428565
91_0	GCA_002436065	public genome	1	1	0	0	nothing_new_here	p__Chloroflexota	c__UBA6077	o__UBA6077	f__UBA6077	g__UBA6077	s__UBA6077 sp002436065
372_0	GCA_002440925	public genome	1	1	0	0	nothing_new_here	p__Chloroflexota	c__Dehalococcoidia	o__GIF9	f__AB-539-J10	g__UBA6803	s__UBA6803 sp002452795
193_0	GCA_002455215	public genome	1	1	0	0	nothing_new_here	p__Chloroflexota	c__Anaerolineae	o__Anaerolineales	f__UBA6668	g__UBA6668	s__UBA6668 sp002455215
264_0	GCA_002455955	public genome	1	1	0	0	nothing_new_here	p__Chloroflexota	c__Dehalococcoidia	o__UBA2979	f__UBA2979	g__UBA6627	s__UBA6627 sp002455955
534_2	GCA_002563855	public genome	1	1	0	0	nothing_new_here	p__Chloroflexota	c__Dehalococcoidia	o__UBA2991	f__UBA2991	g__Tepidiforma	s__Tepidiforma sp002563855
654_0	GCA_002686145	public genome	1	1	0	0	nothing_new_here	p__Chloroflexota	c__Dehalococcoidia	o__SAR202	f__UBA11138	g__UBA2160	s__UBA2160 sp002328865
363_0	GCA_002688105	public genome	1	1	0	0	nothing_new_here	p__Chloroflexota	c__Dehalococcoidia	o__Dehalococcoidales	f__UBA5760	g__GCA-2688105	s__GCA-2688105 sp002688105
1004_7	GCA_002699125	public genome	1	1	0	0	nothing_new_here	p__Chloroflexota	c__Anaerolineae	o__Promineofilales	f__Promineofilaceae	g__GCA-2699125	s__GCA-2699125 sp002699125
466_0	GCA_002699485	public genome	1	1	0	0	nothing_new_here	p__Chloroflexota	c__Dehalococcoidia	o__SAR202	f__UBA2962	g__UBA2962	s__UBA2962 sp002699485
956_2	GCA_002699585	public genome	1	1	0	0	nothing_new_here	p__Chloroflexota	c__Anaerolineae	o__SBR1031	f__A4b	g__GCA-2699585	s__GCA-2699585 sp002699585
266_1	GCA_002701805	public genome	1	1	0	0	nothing_new_here	p__Chloroflexota	c__Dehalococcoidia	o__UBA1151	f__Bin127	g__GCA-002708145	s__GCA-002708145 sp002728715
81_0	GCA_002702065	public genome	1	1	0	0	nothing_new_here	p__Chloroflexota	c__Anaerolineae	o__SBR1031	f__A4b	g__GCA-2702065	s__GCA-2702065 sp002702065
111_0	GCA_002702705	public genome	1	1	0	0	nothing_new_here	p__Chloroflexota	c__Anaerolineae	o__Anaerolineales	f__Anaerolineaceae	g__UBA6170	s__UBA6170 sp002702705
531_0	GCA_002707835	public genome	1	1	0	0	nothing_new_here	p__Chloroflexota	c__Dehalococcoidia	o__UBA2979	f__UBA2979	g__UBA6955	s__UBA6955 sp002707835
441_2	GCA_002710215	public genome	1	1	0	0	nothing_new_here	p__Chloroflexota	c__Dehalococcoidia	o__UBA3495	f__UBA3495	g__UBA11650	s__UBA11650 sp002710215
266_3	GCA_002712125	public genome	1	1	0	0	nothing_new_here	p__Chloroflexota	c__Dehalococcoidia	o__UBA1151	f__Bin127	g__GCA-002708145	s__GCA-002708145 sp002712125
8_1	GCA_002713775	public genome	1	1	0	0	nothing_new_here	p__Chloroflexota	c__Dehalococcoidia	o__UBA2963	f__UBA2963	g__UBA2963	s__UBA2963 sp002719715
266_2	GCA_002714425	public genome	1	1	0	0	nothing_new_here	p__Chloroflexota	c__Dehalococcoidia	o__UBA1151	f__Bin127	g__GCA-002708145	s__GCA-002708145 sp002714425
1_0	GCA_002716865	public genome	1	1	0	0	nothing_new_here	p__Chloroflexota	c__Dehalococcoidia	o__UBA1151	f__TMED-70	g__GCA-002700125	s__GCA-002700125 sp009392285
1216_2	GCA_002717465	public genome	1	1	0	0	nothing_new_here	p__Chloroflexota	c__Dehalococcoidia	o__SAR202	f__UBA826	g__GCA-2717465	s__GCA-2717465 sp002717465
1211_1	GCA_002718095	public genome	3	3	0	0	nothing_new_here	p__Chloroflexota	c__Dehalococcoidia	o__SAR202	f__UBA826	g__UBA826	s__UBA826 sp002718095
9_1	GCA_002719675	public genome	1	1	0	0	nothing_new_here	p__Chloroflexota	c__Dehalococcoidia	o__SAR202	f__GCA-2719675	g__GCA-2719675	s__GCA-2719675 sp002719675
1217_1	GCA_002721445	public genome	1	1	0	0	nothing_new_here	p__Chloroflexota	c__Dehalococcoidia	o__SAR202	f__GCA-002723415	g__GCA-002723415	s__GCA-002723415 sp002721445
2_0	GCA_002721615	public genome	1	1	0	0	nothing_new_here	p__Chloroflexota	c__Dehalococcoidia	o__UBA1151	f__TMED-70	g__GCA-2721615	s__GCA-2721615 sp002721615
1217_2	GCA_002723415	public genome	1	1	0	0	nothing_new_here	p__Chloroflexota	c__Dehalococcoidia	o__SAR202	f__GCA-002723415	g__GCA-002723415	s__GCA-002723415 sp002723415
492_1	GCA_002730555	public genome	1	1	0	0	nothing_new_here	p__Chloroflexota	c__Dehalococcoidia	o__UBA1151	f__UBA1151	g__GCA-2730555	s__GCA-2730555 sp002730555
439_3	GCA_002746355	public genome	1	1	0	0	nothing_new_here	p__Chloroflexota	c__Dehalococcoidia	o__UBA3495	f__UBA3495	g__UBA9611	s__UBA9611 sp002746355
846_4	GCA_002840685	public genome	1	1	0	0	nothing_new_here	p__Chloroflexota	c__Anaerolineae	o__Anaerolineales	f__EnvOPS12	g__UBA8950	s__UBA8950 sp002840685
106_1	GCA_002840735	public genome	1	1	0	0	nothing_new_here	p__Chloroflexota	c__Anaerolineae	o__Anaerolineales	f__Anaerolineaceae	g__UBA6170	s__UBA6170 sp002840735
117_0	GCA_002840755	public genome	1	1	0	0	nothing_new_here	p__Chloroflexota	c__Anaerolineae	o__Anaerolineales	f__Anaerolineaceae	g__UBA6170	s__UBA6170 sp002840755
108_0	GCA_002841995	public genome	1	1	0	0	nothing_new_here	p__Chloroflexota	c__Anaerolineae	o__Anaerolineales	f__Anaerolineaceae	g__UBA6170	s__UBA6170 sp002841995
109_0	GCA_002842015	public genome	1	1	0	0	nothing_new_here	p__Chloroflexota	c__Anaerolineae	o__Anaerolineales	f__Anaerolineaceae	g__UBA6107	s__
106_2	GCA_002842045	public genome	1	1	0	0	nothing_new_here	p__Chloroflexota	c__Anaerolineae	o__Anaerolineales	f__Anaerolineaceae	g__UBA6170	s__UBA6170 sp002842045
1080_0	GCA_002842085	public genome	1	1	0	0	nothing_new_here	p__Chloroflexota	c__Anaerolineae	o__CG2-30-64-16	f__CG2-30-64-16	g__CG2-30-64-16	s__CG2-30-64-16 sp002842085
922_5	GCA_002898735	public genome	1	1	0	0	nothing_new_here	p__Chloroflexota	c__Anaerolineae	o__Thermoflexales	f__Thermoflexaceae	g__Thermoflexus	s__Thermoflexus sp002898735
140_0	GCA_003105035	public genome	1	1	0	0	nothing_new_here	p__Chloroflexota	c__Anaerolineae	o__Anaerolineales	f__UBA4823	g__45689	s__FEB-25 sp003105035
845_0	GCA_003130845	public genome	1	1	0	0	nothing_new_here	p__Chloroflexota	c__Anaerolineae	o__Anaerolineales	f__EnvOPS12	g__UBA5195	s__UBA5195 sp003130845
243_2	GCA_003130875	public genome	1	1	0	0	nothing_new_here	p__Chloroflexota	c__Anaerolineae	o__4572-78	f__NAK82	g__NAK82	s__NAK82 sp003130875
699_1	GCA_003131685	public genome	1	1	0	0	nothing_new_here	p__Dormibacterota	c__Dormibacteria	o__UBA8260	f__UBA8260	g__Palsa-851	s__Palsa-851 sp003131685
691_2	GCA_003132265	public genome	1	1	0	0	nothing_new_here	p__Dormibacterota	c__Dormibacteria	o__UBA8260	f__Bog-877	g__Bog-877	s__Bog-877 sp003132265
699_3	GCA_003132525	public genome	1	1	0	0	nothing_new_here	p__Dormibacterota	c__Dormibacteria	o__UBA8260	f__UBA8260	g__Palsa-851	s__Palsa-851 sp003132525
699_4	GCA_003132805	public genome	1	1	0	0	nothing_new_here	p__Dormibacterota	c__Dormibacteria	o__UBA8260	f__UBA8260	g__Palsa-851	s__Palsa-851 sp003132805
699_6	GCA_003135895	public genome	1	1	0	0	nothing_new_here	p__Dormibacterota	c__Dormibacteria	o__UBA8260	f__UBA8260	g__Palsa-851	s__Palsa-851 sp003135895
292_0	GCA_003141235	public genome	1	1	0	0	nothing_new_here	p__Chloroflexota	c__Dehalococcoidia	o__Dehalococcoidales	f__RBG-16-60-22	g__Fen-1077	s__Fen-1077 sp003141235
636_3	GCA_003141245	public genome	1	1	0	0	nothing_new_here	p__Chloroflexota	c__Ellin6529	o__CSP1-4	f__CSP1-4	g__Fen-1039	s__Fen-1039 sp003141245
634_1	GCA_003141455	public genome	1	1	0	0	nothing_new_here	p__Chloroflexota	c__Ellin6529	o__CSP1-4	f__CSP1-4	g__Fen-1039	s__Fen-1039 sp003141455
839_0	GCA_003141675	public genome	1	1	0	0	nothing_new_here	p__Chloroflexota	c__Anaerolineae	o__Anaerolineales	f__RBG-16-64-43	g__FEN-1073	s__FEN-1073 sp003141675
636_1	GCA_003141955	public genome	1	1	0	0	nothing_new_here	p__Chloroflexota	c__Ellin6529	o__CSP1-4	f__CSP1-4	g__Fen-1039	s__Fen-1039 sp003141955
696_1	GCA_003142035	public genome	1	1	0	0	nothing_new_here	p__Dormibacterota	c__Dormibacteria	o__UBA8260	f__UBA8260	g__UBA8260	s__UBA8260 sp003142035
342_2	GCA_003142375	public genome	1	1	0	0	nothing_new_here	p__Chloroflexota	c__Dehalococcoidia	o__GIF9	f__UBA5629	g__UBA1162	s__UBA1162 sp003142375
667_1	GCA_003151935	public genome	1	1	0	0	nothing_new_here	p__Dormibacterota	c__Dormibacteria	o__Dormibacterales	f__Dormibacteraceae	g__Palsa-870	s__Palsa-870 sp003151935
643_1	GCA_003152165	public genome	1	1	0	0	nothing_new_here	p__Chloroflexota	c__Ellin6529	o__CSP1-4	f__CSP1-4	g__Palsa-1033	s__Palsa-1033 sp003152165
699_5	GCA_003153505	public genome	2	2	0	0	nothing_new_here	p__Dormibacterota	c__Dormibacteria	o__UBA8260	f__UBA8260	g__Palsa-851	s__Palsa-851 sp003153505
835_0	GCA_003154115	public genome	1	1	0	0	nothing_new_here	p__Chloroflexota	c__Anaerolineae	o__Thermoflexales	f__Fen-1058	g__Fen-1058	s__Fen-1058 sp003154115
125_0	GCA_003158355	public genome	1	1	0	0	nothing_new_here	p__Chloroflexota	c__Anaerolineae	o__Anaerolineales	f__Anaerolineaceae	g__UBA6107	s__UBA6107 sp003158355
634_2	GCA_003158575	public genome	1	1	0	0	nothing_new_here	p__Chloroflexota	c__Ellin6529	o__CSP1-4	f__CSP1-4	g__Fen-1039	s__Fen-1039 sp003158295
635_0	GCA_003158675	public genome	1	1	0	0	nothing_new_here	p__Chloroflexota	c__Ellin6529	o__CSP1-4	f__CSP1-4	g__Fen-1039	s__Fen-1039 sp003158675
651_0	GCA_003161995	public genome	1	1	0	0	nothing_new_here	p__Chloroflexota	c__Dehalococcoidia	o__Dehalococcoidales	f__Fen-1064	g__Fen-1064	s__Fen-1064 sp003162335
699_2	GCA_003162415	public genome	1	1	0	0	nothing_new_here	p__Dormibacterota	c__Dormibacteria	o__UBA8260	f__UBA8260	g__Palsa-851	s__Palsa-851 sp003162415
643_3	GCA_003169655	public genome	1	1	0	0	nothing_new_here	p__Chloroflexota	c__Ellin6529	o__CSP1-4	f__CSP1-4	g__Palsa-1033	s__Palsa-1033 sp003169655
633_0	GCA_003169735	public genome	1	1	0	0	nothing_new_here	p__Chloroflexota	c__Ellin6529	o__CSP1-4	f__CSP1-4	g__Palsa-1032	s__Palsa-1032 sp003169735
667_2	GCA_003169845	public genome	1	1	0	0	nothing_new_here	p__Dormibacterota	c__Dormibacteria	o__Dormibacterales	f__Dormibacteraceae	g__Palsa-870	s__Palsa-870 sp003169845
696_2	GCA_003170875	public genome	1	1	0	0	nothing_new_here	p__Dormibacterota	c__Dormibacteria	o__UBA8260	f__UBA8260	g__UBA8260	s__UBA8260 sp003170875
636_2	GCA_003171065	public genome	1	1	0	0	nothing_new_here	p__Chloroflexota	c__Ellin6529	o__CSP1-4	f__CSP1-4	g__Fen-1039	s__Fen-1039 sp003171065
1106_2	GCA_003205875	public genome	1	1	0	0	nothing_new_here	p__Chloroflexota	c__Chloroflexia	o__Chloroflexales	f__Herpetosiphonaceae	g__Herpetosiphon	s__Herpetosiphon llansteffanensis
254_0	GCA_003228115	public genome	1	1	0	0	nothing_new_here	p__Chloroflexota	c__Dehalococcoidia	o__SAR202-VII-2	f__SAR202-VII-2	g__SAR202-VII-2	s__SAR202-VII-2 sp003228115
15_0	GCA_003228195	public genome	1	1	0	0	nothing_new_here	p__Chloroflexota	c__Dehalococcoidia	o__UBA6952	f__QGNO01	g__QGNO01	s__QGNO01 sp003228195
692_0	GCA_003228685	public genome	1	1	0	0	nothing_new_here	p__Chloroflexota	c__Dehalococcoidia	o__DSTF01	f__RBG-16-68-14	g__SZUA-185	s__SZUA-185 sp003228685
705_0	GCA_003243965	public genome	1	1	0	0	nothing_new_here	p__Chloroflexota	c__Ellin6529	o__QHBO01	f__QHBO01	g__QHBO01	s__QHBO01 sp003243965
660_1	GCA_003244185	public genome	1	1	0	0	nothing_new_here	p__Dormibacterota	c__Dormibacteria	o__Dormibacterales	f__Dormibacteraceae	g__Dormibacter	s__Dormibacter sp003244185
34_3	GCA_003268475	public genome	1	1	0	0	nothing_new_here	p__Chloroflexota	c__Ktedonobacteria	o__Ktedonobacterales	f__Ktedonobacteraceae	g__Thermogemmatispora	s__Thermogemmatispora tikiterensis
192_0	GCA_003353825	public genome	1	1	0	0	nothing_new_here	p__Chloroflexota	c__Anaerolineae	o__Caldilineales	f__J102	g__	s__
1021_3	GCA_003451595	public genome	1	1	0	0	nothing_new_here	p__Chloroflexota	c__Anaerolineae	o__Caldilineales	f__Caldilineaceae	g__Caldilinea	s__Caldilinea sp003451595
118_2	GCA_003453955	public genome	1	1	0	0	nothing_new_here	p__Chloroflexota	c__Anaerolineae	o__Anaerolineales	f__Anaerolineaceae	g__Bellilinea	s__Bellilinea sp001796355
888_0	GCA_003484265	public genome	1	1	0	0	nothing_new_here	p__Chloroflexota	c__Anaerolineae	o__Anaerolineales	f__EnvOPS12	g__UBA12294	s__UBA12294 sp003484265
1000_0	GCA_003520455	public genome	1	1	0	0	nothing_new_here	p__Chloroflexota	c__Anaerolineae	o__Ardenticatenales	f__Ardenticatenaceae	g__	s__
1218_0	GCA_003523055	public genome	1	1	0	0	nothing_new_here	p__Chloroflexota	c__Dehalococcoidia	o__UBA3495	f__UBA2588	g__UBA2588	s__UBA2588 sp003523055
362_0	GCA_003551705	public genome	1	1	0	0	nothing_new_here	p__Chloroflexota	c__Dehalococcoidia	o__UBA2777	f__RBG-13-53-26	g__PUNJ01	s__PUNJ01 sp003551705
1210_0	GCA_003552785	public genome	1	1	0	0	nothing_new_here	p__Chloroflexota	c__Dehalococcoidia	o__Dehalococcoidales	f__CSSed11-197	g__CSSed11-197	s__CSSed11-197 sp003552785
1146_0	GCA_003562365	public genome	1	1	0	0	nothing_new_here	p__Chloroflexota	c__Anaerolineae	o__B4-G1	f__SLSP01	g__PWVB01	s__PWVB01 sp003562365
1095_0	GCA_003562415	public genome	1	1	0	0	nothing_new_here	p__Chloroflexota	c__Anaerolineae	o__B4-G1	f__SLSP01	g__SLSP01	s__SLSP01 sp007130345
936_0	GCA_003562475	public genome	1	1	0	0	nothing_new_here	p__Chloroflexota	c__Dehalococcoidia	o__GIF9	f__AB-539-J10	g__SKVJ01	s__SKVJ01 sp003562475
937_0	GCA_003563175	public genome	1	1	0	0	nothing_new_here	p__Chloroflexota	c__Dehalococcoidia	o__GIF9	f__AB-539-J10	g__SKVJ01	s__SKVJ01 sp007129495
1018_0	GCA_003567995	public genome	1	1	0	0	nothing_new_here	p__Chloroflexota	c__Dehalococcoidia	o__GIF9	f__AB-539-J10	g__E29-bin54	s__E29-bin54 sp003556385
970_0	GCA_003569045	public genome	1	1	0	0	nothing_new_here	p__Chloroflexota	c__Anaerolineae	o__SBR1031	f__UBA2029	g__MO-CFX2	s__MO-CFX2 sp003569045
1040_2	GCA_003569365	public genome	1	1	0	0	nothing_new_here	p__Chloroflexota	c__Anaerolineae	o__Anaerolineales	f__UBA11657	g__BD1	s__BD1 sp003569365
812_0	GCA_003577005	public genome	1	1	0	0	nothing_new_here	p__Chloroflexota	c__Anaerolineae	o__Caldilineales	f__Caldilineaceae	g__CFX5	s__CFX5 sp003577005
59_0	GCA_003577355	public genome	1	1	0	0	nothing_new_here	p__Chloroflexota	c__Chloroflexia	o__Thermomicrobiales	f__CFX8	g__CFX8	s__CFX8 sp003577355
725_0	GCA_003577365	public genome	1	1	0	0	nothing_new_here	p__Chloroflexota	c__Anaerolineae	o__Caldilineales	f__Caldilineaceae	g__Litorilinea	s__
127_0	GCA_003934145	public genome	1	1	0	0	nothing_new_here	p__Chloroflexota	c__Chloroflexia	o__Chloroflexales	f__Chloroflexaceae	g__Viridilinea	s__
325_0	GCA_003966975	public genome	1	1	0	0	nothing_new_here	p__Chloroflexota	c__Anaerolineae	o__Anaerolineales	f__Anaerolineaceae	g__Pelolinea	s__Pelolinea submarina
40_0	GCA_003967515	public genome	1	1	0	0	nothing_new_here	p__Chloroflexota	c__Ktedonobacteria	o__Ktedonobacterales	f__Ktedonobacteraceae	g__Dictyobacter	s__Dictyobacter aurantiacus
571_2	GCA_004138135	public genome	1	1	0	0	nothing_new_here	p__Chloroflexota	c__Chloroflexia	o__Chloroflexales	f__Chloroflexaceae	g__Oscillochloris	s__Oscillochloris fontis
572_0	GCA_004138165	public genome	1	1	0	0	nothing_new_here	p__Chloroflexota	c__Chloroflexia	o__Chloroflexales	f__Chloroflexaceae	g__Chloroploca	s__Chloroploca sp004138165
587_2	GCA_004138175	public genome	1	1	0	0	nothing_new_here	p__Chloroflexota	c__Chloroflexia	o__Chloroflexales	f__Chloroflexaceae	g__Oscillochloris	s__Oscillochloris sp004138175
131_0	GCA_004208415	public genome	1	1	0	0	nothing_new_here	p__Chloroflexota	c__Ktedonobacteria	o__Ktedonobacterales	f__Ktedonobacteraceae	g__Ktedonosporobacter	s__Ktedonosporobacter rubrisoli
4_0	GCA_004214105	public genome	1	1	0	0	nothing_new_here	p__Chloroflexota	c__Dehalococcoidia	o__UBA1151	f__TMED-70	g__TMED-70	s__TMED-70 sp002699165
1114_2	GCA_004295045	public genome	1	1	0	0	nothing_new_here	p__Chloroflexota	c__Anaerolineae	o__UBA4142	f__SHND01	g__SHND01	s__SHND01 sp004295045
499_0	GCA_004297315	public genome	1	1	0	0	nothing_new_here	p__Chloroflexota	c__Dehalococcoidia	o__UBA2979	f__UBA2979	g__SURF-43	s__SURF-43 sp004297315
686_0	GCA_004297765	public genome	1	1	0	0	nothing_new_here	p__Chloroflexota	c__Dehalococcoidia	o__FW602-bin16	f__FW602-bin16	g__FW602-bin16	s__FW602-bin16 sp004297765
617_0	GCA_004297775	public genome	1	1	0	0	nothing_new_here	p__Chloroflexota	c__FW602-bin22	o__FW602-bin22	f__FW602-bin22	g__FW602-bin22	s__FW602-bin22 sp004297775
583_0	GCA_004367505	public genome	1	1	0	0	nothing_new_here	p__Chloroflexota	c__Chloroflexia	o__Chloroflexales	f__Chloroflexaceae	g__OHK40	s__OHK40 sp004367505
472_2	GCA_004376075	public genome	1	1	0	0	nothing_new_here	p__Chloroflexota	c__Dehalococcoidia	o__SZUA-161	f__E44-bin15	g__E44-bin26	s__E44-bin26 sp004376075
496_1	GCA_004376895	public genome	1	1	0	0	nothing_new_here	p__Chloroflexota	c__Anaerolineae	o__Anaerolineales	f__E44-bin32	g__E44-bin32	s__E44-bin32 sp004376895
468_0	GCA_004377275	public genome	1	1	0	0	nothing_new_here	p__Chloroflexota	c__Dehalococcoidia	o__SZUA-161	f__E44-bin15	g__E29-bin15	s__E29-bin15 sp004377275
931_0	GCA_004377365	public genome	1	1	0	0	nothing_new_here	p__Chloroflexota	c__Anaerolineae	o__E26-bin7	f__E26-bin7	g__E26-bin7	s__E26-bin7 sp004377365
260_0	GCA_005223035	public genome	1	1	0	0	nothing_new_here	p__Chloroflexota	c__Anaerolineae	o__UBA7937	f__B3-Chlor	g__B3-Chlor	s__B3-Chlor sp005223035
43_0	GCA_005402645	public genome	1	1	0	0	nothing_new_here	p__Chloroflexota	c__Ktedonobacteria	o__Ktedonobacterales	f__Ktedonobacteraceae	g__Thermosporothrix	s__Thermosporothrix hazakensis
199_0	GCA_005880035	public genome	1	1	0	0	nothing_new_here	p__Chloroflexota	c__Ellin6529	o__P2-11E	f__P2-11E	g__CF-39	s__CF-39 sp005887995
668_3	GCA_005880315	public genome	1	1	0	0	nothing_new_here	p__Dormibacterota	c__Dormibacteria	o__Dormibacterales	f__Dormibacteraceae	g__UBA10449	s__UBA10449 sp005880315
1131_0	GCA_005880615	public genome	1	1	0	0	nothing_new_here	p__Dormibacterota	c__Dormibacteria	o__CF-121	f__CF-121	g__CF-121	s__CF-121 sp005880615
661_0	GCA_005880695	public genome	1	1	0	0	nothing_new_here	p__Dormibacterota	c__Dormibacteria	o__Dormibacterales	f__Dormibacteraceae	g__VBGR01	s__VBGR01 sp005880695
664_4	GCA_005880795	public genome	1	1	0	0	nothing_new_here	p__Dormibacterota	c__Dormibacteria	o__Dormibacterales	f__Dormibacteraceae	g__40CM-4-65-16	s__40CM-4-65-16 sp005880795
664_2	GCA_005880915	public genome	1	1	0	0	nothing_new_here	p__Dormibacterota	c__Dormibacteria	o__Dormibacterales	f__Dormibacteraceae	g__40CM-4-65-16	s__40CM-4-65-16 sp005880915
669_0	GCA_005880945	public genome	1	1	0	0	nothing_new_here	p__Dormibacterota	c__Dormibacteria	o__Dormibacterales	f__Dormibacteraceae	g__Palsa-872	s__Palsa-872 sp005880945
698_0	GCA_005880985	public genome	1	1	0	0	nothing_new_here	p__Dormibacterota	c__Dormibacteria	o__UBA8260	f__UBA8260	g__CF-134	s__CF-134 sp005880985
655_3	GCA_005881215	public genome	1	1	0	0	nothing_new_here	p__Dormibacterota	c__Dormibacteria	o__CF-121	f__CF-121	g__CF-13	s__CF-13 sp005881215
203_0	GCA_005881435	public genome	1	1	0	0	nothing_new_here	p__Chloroflexota	c__Ellin6529	o__P2-11E	f__CF-107	g__CF-107	s__CF-107 sp005881435
49_1	GCA_005881495	public genome	2	1	1	0	old+new_onlyMAGsSRA	p__Chloroflexota	c__Ktedonobacteria	o__Ktedonobacterales	f__Ktedonobacteraceae	g__UBA11361	s__UBA11361 sp005881495
202_1	GCA_005881735	public genome	1	1	0	0	nothing_new_here	p__Chloroflexota	c__Ellin6529	o__P2-11E	f__P2-11E	g__3-1-20CM-2-70-9	s__3-1-20CM-2-70-9 sp005889075
659_0	GCA_005881825	public genome	1	1	0	0	nothing_new_here	p__Dormibacterota	c__Dormibacteria	o__Dormibacterales	f__Dormibacteraceae	g__CF-28	s__CF-28 sp005881825
198_1	GCA_005881885	public genome	1	1	0	0	nothing_new_here	p__Chloroflexota	c__Ellin6529	o__P2-11E	f__P2-11E	g__3-1-20CM-2-70-9	s__3-1-20CM-2-70-9 sp005881885
662_1	GCA_005882115	public genome	2	2	0	0	nothing_new_here	p__Dormibacterota	c__Dormibacteria	o__Dormibacterales	f__Dormibacteraceae	g__40CM-4-65-16	s__40CM-4-65-16 sp001917775
645_1	GCA_005882635	public genome	1	1	0	0	nothing_new_here	p__Chloroflexota	c__Ellin6529	o__CSP1-4	f__CSP1-4	g__CF-46	s__CF-46 sp005882635
655_1	GCA_005882725	public genome	1	1	0	0	nothing_new_here	p__Dormibacterota	c__Dormibacteria	o__CF-121	f__CF-121	g__CF-13	s__CF-13 sp005881715
657_0	GCA_005882775	public genome	1	1	0	0	nothing_new_here	p__Dormibacterota	c__Dormibacteria	o__CF-121	f__CF-121	g__VBDY01	s__VBDY01 sp005882775
664_1	GCA_005882825	public genome	2	2	0	0	nothing_new_here	p__Dormibacterota	c__Dormibacteria	o__Dormibacterales	f__Dormibacteraceae	g__40CM-4-65-16	s__40CM-4-65-16 sp005881275
622_0	GCA_005882985	public genome	1	1	0	0	nothing_new_here	p__Chloroflexota	c__Dehalococcoidia	o__SM23-28-2	f__RBG-16-64-32	g__CF-163	s__CF-163 sp005882985
545_0	GCA_005883405	public genome	1	1	0	0	nothing_new_here	p__Chloroflexota	c__UBA6077	o__UBA6077	f__CF-72	g__CF-72	s__CF-72 sp005883405
663_0	GCA_005883575	public genome	1	1	0	0	nothing_new_here	p__Dormibacterota	c__Dormibacteria	o__Dormibacterales	f__Dormibacteraceae	g__40CM-4-65-16	s__40CM-4-65-16 sp005883575
668_2	GCA_005883585	public genome	1	1	0	0	nothing_new_here	p__Dormibacterota	c__Dormibacteria	o__Dormibacterales	f__Dormibacteraceae	g__UBA10449	s__UBA10449 sp001917895
623_0	GCA_005883615	public genome	1	1	0	0	nothing_new_here	p__Chloroflexota	c__Ellin6529	o__CSP1-4	f__CSP1-4	g__CF-16	s__CF-16 sp005883615
198_2	GCA_005883625	public genome	1	1	0	0	nothing_new_here	p__Chloroflexota	c__Ellin6529	o__P2-11E	f__P2-11E	g__3-1-20CM-2-70-9	s__3-1-20CM-2-70-9 sp001919195
664_6	GCA_005887685	public genome	1	1	0	0	nothing_new_here	p__Dormibacterota	c__Dormibacteria	o__Dormibacterales	f__Dormibacteraceae	g__40CM-4-65-16	s__40CM-4-65-16 sp005887685
664_5	GCA_005887735	public genome	1	1	0	0	nothing_new_here	p__Dormibacterota	c__Dormibacteria	o__Dormibacterales	f__Dormibacteraceae	g__40CM-4-65-16	s__40CM-4-65-16 sp005887735
664_3	GCA_005889085	public genome	1	1	0	0	nothing_new_here	p__Dormibacterota	c__Dormibacteria	o__Dormibacterales	f__Dormibacteraceae	g__40CM-4-65-16	s__40CM-4-65-16 sp005889085
662_2	GCA_005889135	public genome	1	1	0	0	nothing_new_here	p__Dormibacterota	c__Dormibacteria	o__Dormibacterales	f__Dormibacteraceae	g__40CM-4-65-16	s__40CM-4-65-16 sp005889135
655_2	GCA_005889225	public genome	1	1	0	0	nothing_new_here	p__Dormibacterota	c__Dormibacteria	o__CF-121	f__CF-121	g__CF-13	s__CF-13 sp005889225
202_2	GCA_005889295	public genome	1	1	0	0	nothing_new_here	p__Chloroflexota	c__Ellin6529	o__P2-11E	f__P2-11E	g__3-1-20CM-2-70-9	s__3-1-20CM-2-70-9 sp005889295
695_1	GCA_005889335	public genome	1	1	0	0	nothing_new_here	p__Dormibacterota	c__Dormibacteria	o__UBA8260	f__UBA8260	g__CF-75	s__CF-75 sp005880445
656_0	GCA_005889345	public genome	1	1	0	0	nothing_new_here	p__Dormibacterota	c__Dormibacteria	o__CF-121	f__CF-121	g__CF-13	s__CF-13 sp005889345
200_0	GCA_005889405	public genome	1	1	0	0	nothing_new_here	p__Chloroflexota	c__Ellin6529	o__P2-11E	f__P2-11E	g__CF-39	s__CF-39 sp005889405
642_1	GCA_005889475	public genome	1	1	0	0	nothing_new_here	p__Chloroflexota	c__Ellin6529	o__CSP1-4	f__CSP1-4	g__UBA5189	s__UBA5189 sp005889475
662_3	GCA_005889495	public genome	1	1	0	0	nothing_new_here	p__Dormibacterota	c__Dormibacteria	o__Dormibacterales	f__Dormibacteraceae	g__40CM-4-65-16	s__40CM-4-65-16 sp005889495
1046_1	GCA_006569185	public genome	2	2	0	0	nothing_new_here	p__Chloroflexota	c__Anaerolineae	o__Caldilineales	f__Caldilineaceae	g__Litorilinea	s__Litorilinea aerophila
538_0	GCA_007118095	public genome	1	1	0	0	nothing_new_here	p__Chloroflexota	c__Dehalococcoidia	o__UBA2991	f__UBA2991	g__SLAK01	s__SLAK01 sp007118095
1009_0	GCA_007123775	public genome	1	1	0	0	nothing_new_here	p__Chloroflexota	c__Anaerolineae	o__Promineofilales	f__Promineofilaceae	g__SLGK01	s__SLGK01 sp007123775
908_1	GCA_007125045	public genome	3	3	0	0	nothing_new_here	p__Chloroflexota	c__Anaerolineae	o__B4-G1	f__B4-G1	g__SKLM01	s__SKLM01 sp007123205
1147_0	GCA_007125545	public genome	1	1	0	0	nothing_new_here	p__Chloroflexota	c__Anaerolineae	o__B4-G1	f__SLSP01	g__PWVB01	s__PWVB01 sp007125545
270_0	GCA_007132185	public genome	1	1	0	0	nothing_new_here	p__Chloroflexota	c__Anaerolineae	o__UBA1429	f__UBA1429	g__UBA1429	s__UBA1429 sp007132185
682_1	GCA_007133615	public genome	2	2	0	0	nothing_new_here	p__Chloroflexota	c__Chloroflexia	o__Thermomicrobiales	f__Thermomicrobiaceae	g__SLMJ01	s__SLMJ01 sp007133615
961_0	GCA_007693385	public genome	1	1	0	0	nothing_new_here	p__Chloroflexota	c__Anaerolineae	o__SBR1031	f__A4b	g__J038	s__J038 sp007693385
683_0	GCA_007695115	public genome	1	1	0	0	nothing_new_here	p__Chloroflexota	c__Chloroflexia	o__Thermomicrobiales	f__Thermomicrobiaceae	g__SLMJ01	s__SLMJ01 sp007695115
44_0	GCA_008326305	public genome	1	1	0	0	nothing_new_here	p__Chloroflexota	c__Ktedonobacteria	o__Ktedonobacterales	f__Ktedonobacteraceae	g__Dictyobacter	s__Dictyobacter sp008326305
478_1	GCA_008373095	public genome	1	1	0	0	nothing_new_here	p__Chloroflexota	c__Dehalococcoidia	o__SAR202	f__UBA826	g__UBA11996	s__UBA11996 sp002320875
85_0	GCA_008501685	public genome	1	1	0	0	nothing_new_here	p__Chloroflexota	c__Anaerolineae	o__Anaerolineales	f__UBA11579	g__CFX15	s__CFX15 sp013112575
534_1	GCA_008838325	public genome	3	1	2	0	old+new_onlyMAGsSRA	p__Chloroflexota	c__Dehalococcoidia	o__UBA2991	f__UBA2991	g__Tepidiforma	s__Tepidiforma bonchosmolovskayae
46_0	GCA_008974265	public genome	1	1	0	0	nothing_new_here	p__Chloroflexota	c__Ktedonobacteria	o__Ktedonobacterales	f__Ktedonobacteraceae	g__Dictyobacter	s__Dictyobacter vulcani
34_4	GCA_008974285	public genome	1	1	0	0	nothing_new_here	p__Chloroflexota	c__Ktedonobacteria	o__Ktedonobacterales	f__Ktedonobacteraceae	g__Thermogemmatispora	s__Thermogemmatispora aurantia
590_0	GCA_009268125	public genome	1	1	0	0	nothing_new_here	p__Chloroflexota	c__Chloroflexia	o__Chloroflexales	f__Roseiflexaceae	g__SDU3-3	s__SDU3-3 sp009268125
500_0	GCA_009377665	public genome	1	1	0	0	nothing_new_here	p__Chloroflexota	c__Dehalococcoidia	o__WHTO01	f__WHTO01	g__WHTO01	s__WHTO01 sp009377665
461_0	GCA_009377715	public genome	1	1	0	0	nothing_new_here	p__Chloroflexota	c__Dehalococcoidia	o__SM23-28-2	f__WHTN01	g__WHTN01	s__WHTN01 sp009377715
906_0	GCA_009377745	public genome	1	1	0	0	nothing_new_here	p__Chloroflexota	c__Dehalococcoidia	o__DSTF01	f__WHTK01	g__WHTK01	s__WHTK01 sp009377745
501_1	GCA_009379925	public genome	1	1	0	0	nothing_new_here	p__Chloroflexota	c__Dehalococcoidia	o__UBA2979	f__UBA2979	g__WHSU01	s__WHSU01 sp009379925
439_2	GCA_009391395	public genome	1	1	0	0	nothing_new_here	p__Chloroflexota	c__Dehalococcoidia	o__UBA3495	f__UBA3495	g__UBA9611	s__UBA9611 sp002328185
465_1	GCA_009391415	public genome	1	1	0	0	nothing_new_here	p__Chloroflexota	c__Dehalococcoidia	o__UBA1151	f__Bin127	g__GCA-002725925	s__GCA-002725925 sp009392785
8_2	GCA_009391465	public genome	1	1	0	0	nothing_new_here	p__Chloroflexota	c__Dehalococcoidia	o__UBA2963	f__UBA2963	g__UBA2963	s__UBA2963 sp003215215
16_0	GCA_009391535	public genome	1	1	0	0	nothing_new_here	p__Chloroflexota	c__Dehalococcoidia	o__UBA2985	f__UBA2985	g__VFHP01	s__VFHP01 sp009391535
1222_0	GCA_009392005	public genome	1	1	0	0	nothing_new_here	p__Chloroflexota	c__Dehalococcoidia	o__UBA6926	f__VFHL01	g__VFHL01	s__VFHL01 sp009392005
10_0	GCA_009392195	public genome	1	1	0	0	nothing_new_here	p__Chloroflexota	c__Dehalococcoidia	o__SAR202	f__OSU-TB39	g__OSU-TB39	s__OSU-TB39 sp009392195
465_2	GCA_009392215	public genome	1	1	0	0	nothing_new_here	p__Chloroflexota	c__Dehalococcoidia	o__UBA1151	f__Bin127	g__GCA-002725925	s__GCA-002725925 sp009392215
438_1	GCA_009392255	public genome	1	1	0	0	nothing_new_here	p__Chloroflexota	c__Dehalococcoidia	o__UBA3495	f__UBA3495	g__UBA9611	s__UBA9611 sp002721995
9_2	GCA_009392295	public genome	1	1	0	0	nothing_new_here	p__Chloroflexota	c__Dehalococcoidia	o__SAR202	f__GCA-2719675	g__GCA-2719675	s__GCA-2719675 sp009392295
1216_1	GCA_009392805	public genome	3	3	0	0	nothing_new_here	p__Chloroflexota	c__Dehalococcoidia	o__UBA3495	f__UBA2588	g__UBA2588	s__UBA2588 sp002723125
1139_0	GCA_009692665	public genome	1	1	0	0	nothing_new_here	p__Chloroflexota	c__Dehalococcoidia	o__UBA1127	f__SHYT01	g__SHYT01	s__SHYT01 sp009692665
486_0	GCA_009692865	public genome	1	1	0	0	nothing_new_here	p__Chloroflexota	c__Dehalococcoidia	o__GCA-2717565	f__GCA-2717565	g__SHYH01	s__SHYH01 sp009692865
346_0	GCA_009693015	public genome	1	1	0	0	nothing_new_here	p__Chloroflexota	c__Dehalococcoidia	o__SHYB01	f__SHYB01	g__SHYB01	s__SHYB01 sp009693015
485_2	GCA_009693075	public genome	1	1	0	0	nothing_new_here	p__Chloroflexota	c__Dehalococcoidia	o__UBA3495	f__UBA3495	g__SHYG01	s__SHYG01 sp009692925
451_0	GCA_009693115	public genome	1	1	0	0	nothing_new_here	p__Chloroflexota	c__Dehalococcoidia	o__UBA1151	f__SHXW01	g__SHXW01	s__SHXW01 sp009693115
856_3	GCA_009772985	public genome	1	1	0	0	nothing_new_here	p__Chloroflexota	c__Anaerolineae	o__Anaerolineales	f__EnvOPS12	g__UBA877	s__UBA877 sp009772985
122_0	GCA_009773005	public genome	1	1	0	0	nothing_new_here	p__Chloroflexota	c__Anaerolineae	o__Anaerolineales	f__Anaerolineaceae	g__UBA6107	s__UBA6107 sp009773005
1136_1	GCA_009838175	public genome	1	1	0	0	nothing_new_here	p__Chloroflexota	c__Dehalococcoidia	o__UBA1151	f__Bin127	g__Bin127	s__Bin127 sp009838175
428_1	GCA_009838465	public genome	1	1	0	0	nothing_new_here	p__Chloroflexota	c__Dehalococcoidia	o__SAR202	f__UBA11138	g__VXRN01	s__VXRN01 sp009838465
385_6	GCA_009838625	public genome	2	1	1	0	old+new_onlyMAGsSRA	p__Chloroflexota	c__Anaerolineae	o__Caldilineales	f__Caldilineaceae	g__Bin5	s__Bin5 sp009838625
393_3	GCA_009838965	public genome	3	2	1	0	old+new_onlyMAGsSRA	p__Chloroflexota	c__Dehalococcoidia	o__UBA2963	f__UBA2963	g__Bin16	s__Bin16 sp009838965
539_3	GCA_009839725	public genome	4	2	2	0	old+new_onlyMAGsSRA	p__Chloroflexota	c__Dehalococcoidia	o__UBA2991	f__UBA2991	g__UBA2991	s__UBA2991 sp009839725
504_1	GCA_009839925	public genome	1	1	0	0	nothing_new_here	p__Chloroflexota	c__Dehalococcoidia	o__UBA2979	f__UBA2979	g__VXMT01	s__VXMT01 sp009839925
434_3	GCA_009840135	public genome	2	1	1	0	old+new_onlyMAGsSRA	p__Chloroflexota	c__Dehalococcoidia	o__UBA3495	f__UBA3495	g__Bin22	s__Bin22 sp009840135
419_2	GCA_009840165	public genome	2	1	1	0	old+new_onlyMAGsSRA	p__Chloroflexota	c__Dehalococcoidia	o__UBA3495	f__UBA3495	g__Bin87	s__Bin87 sp009840165
416_1	GCA_009840175	public genome	2	1	1	0	old+new_onlyMAGsSRA	p__Chloroflexota	c__Dehalococcoidia	o__UBA3495	f__UBA3495	g__VXOI01	s__VXOI01 sp009840175
385_3	GCA_009840225	public genome	3	2	1	0	old+new_onlyMAGsSRA	p__Chloroflexota	c__Anaerolineae	o__Caldilineales	f__Caldilineaceae	g__Bin5	s__Bin5 sp009840225
504_3	GCA_009840945	public genome	2	1	1	0	old+new_onlyMAGsSRA	p__Chloroflexota	c__Dehalococcoidia	o__UBA2979	f__UBA2979	g__VXMT01	s__VXMT01 sp009840945
504_2	GCA_009840965	public genome	1	1	0	0	nothing_new_here	p__Chloroflexota	c__Dehalococcoidia	o__UBA2979	f__UBA2979	g__VXMT01	s__VXMT01 sp009840965
456_1	GCA_009841045	public genome	2	1	1	0	old+new_onlyMAGsSRA	p__Chloroflexota	c__Dehalococcoidia	o__UBA6926	f__UBA6926	g__VXMO01	s__VXMO01 sp009841045
382_2	GCA_009841145	public genome	8	5	3	0	old+new_onlyMAGsSRA	p__Chloroflexota	c__Anaerolineae	o__Caldilineales	f__Bin34	g__Bin34	s__Bin34 sp009841145
521_3	GCA_009841545	public genome	5	4	1	0	mostly_old	p__Chloroflexota	c__Dehalococcoidia	o__Bin125	f__Bin125	g__Bin125	s__Bin125 sp009838735
474_1	GCA_009841605	public genome	5	3	2	0	old+new_onlyMAGsSRA	p__Chloroflexota	c__Dehalococcoidia	o__SAR202	f__VXLM01	g__VXLM01	s__VXLM01 sp009841605
838_0	GCA_009885945	public genome	1	1	0	0	nothing_new_here	p__Chloroflexota	c__Anaerolineae	o__Anaerolineales	f__EnvOPS12	g__OLB14	s__OLB14 sp009885945
1208_0	GCA_009925905	public genome	1	1	0	0	nothing_new_here	p__Chloroflexota	c__Ellin6529	o__CSP1-4	f__UBA10416	g__UBA10416	s__UBA10416 sp009925905
5_0	GCA_009937255	public genome	1	1	0	0	nothing_new_here	p__Chloroflexota	c__Dehalococcoidia	o__UBA1151	f__TMED-70	g__TMED-70	s__TMED-70 sp009937255
562_0	GCA_009937635	public genome	1	1	0	0	nothing_new_here	p__Chloroflexota	c__Anaerolineae	o__Promineofilales	f__Promineofilaceae	g__JAACFF01	s__JAACFF01 sp009937635
149_0	GCA_010092775	public genome	1	1	0	0	nothing_new_here	p__Chloroflexota	c__Anaerolineae	o__SBR1031	f__UBA3940	g__TC-71	s__TC-71 sp010092775
28_0	GCA_010092845	public genome	1	1	0	0	nothing_new_here	p__Chloroflexota	c__Anaerolineae	o__SBR1031	f__J027	g__J027	s__J027 sp010092845
730_0	GCA_010092885	public genome	1	1	0	0	nothing_new_here	p__Chloroflexota	c__Anaerolineae	o__SBR1031	f__UBA3940	g__TC-195	s__TC-195 sp010092885
783_0	GCA_011046615	public genome	1	1	0	0	nothing_new_here	p__Chloroflexota	c__Anaerolineae	o__Anaerolineales	f__E44-bin32	g__DSPQ01	s__DSPQ01 sp011046615
1100_1	GCA_011047095	public genome	2	1	1	0	old+new_onlyMAGsSRA	p__Chloroflexota	c__Anaerolineae	o__Anaerolineales	f__UBA6663	g__DSNW01	s__DSNW01 sp011047095
409_3	GCA_011047455	public genome	2	1	1	0	old+new_onlyMAGsSRA	p__Chloroflexota	c__Dehalococcoidia	o__SM23-28-2	f__HRbin24	g__HRBIN24	s__HRBIN24 sp011047455
749_1	GCA_011048175	public genome	2	1	1	0	old+new_onlyMAGsSRA	p__Chloroflexota	c__Anaerolineae	o__DSLN01	f__DSLN01	g__DSLN01	s__DSLN01 sp011048175
407_3	GCA_011048275	public genome	1	1	0	0	nothing_new_here	p__Chloroflexota	c__Dehalococcoidia	o__UBA2991	f__UBA2991	g__HRBIN29	s__HRBIN29 sp011048275
731_0	GCA_011051745	public genome	1	1	0	0	nothing_new_here	p__Chloroflexota	c__Anaerolineae	o__SBR1031	f__UBA3940	g__DRKO01	s__DRKO01 sp011051745
921_4	GCA_011053895	public genome	2	1	1	0	old+new_onlyMAGsSRA	p__Chloroflexota	c__Anaerolineae	o__B4-G1	f__DUEL01	g__SpSt-77	s__SpSt-77 sp011053895
563_1	GCA_011054265	public genome	1	1	0	0	nothing_new_here	p__Chloroflexota	c__Chloroflexia	o__Thermomicrobiales	f__Thermomicrobiaceae	g__HRBIN26	s__HRBIN26 peleae_A
914_0	GCA_011055765	public genome	1	1	0	0	nothing_new_here	p__Chloroflexota	c__Anaerolineae	o__Anaerolineales	f__UBA4823	g__DSOS01	s__DSOS01 sp011055765
896_1	GCA_011057285	public genome	3	1	1	1	old+new_MAGsSRA+Sample	p__Chloroflexota	c__Dehalococcoidia	o__SpSt-223	f__SpSt-223	g__SpSt-223	s__SpSt-223 sp011053995
916_1	GCA_011057325	public genome	2	1	1	0	old+new_onlyMAGsSRA	p__Chloroflexota	c__Dehalococcoidia	o__DSGV01	f__DSGV01	g__DSGV01	s__DSGV01 sp011057325
332_1	GCA_011170285	public genome	1	1	0	0	nothing_new_here	p__Chloroflexota	c__Dehalococcoidia	o__Dehalococcoidales	f__UBA5760	g__W498	s__W498 sp011170285
297_1	GCA_011170375	public genome	2	1	1	0	old+new_onlyMAGsSRA	p__Chloroflexota	c__Dehalococcoidia	o__Dehalococcoidales	f__Fen-1064	g__W589	s__W589 sp011170375
296_1	GCA_011171075	public genome	2	1	1	0	old+new_onlyMAGsSRA	p__Chloroflexota	c__Dehalococcoidia	o__Dehalococcoidales	f__Fen-1064	g__W589	s__W589 sp011171075
484_1	GCA_011174795	public genome	2	1	1	0	old+new_onlyMAGsSRA	p__Chloroflexota	c__Dehalococcoidia	o__SZUA-161	f__SZUA-161	g__W281	s__W281 sp011174795
524_0	GCA_011174825	public genome	1	1	0	0	nothing_new_here	p__Chloroflexota	c__Anaerolineae	o__Anaerolineales	f__E44-bin32	g__DUEZ01	s__DUEZ01 sp011174825
763_0	GCA_011176535	public genome	1	1	0	0	nothing_new_here	p__Chloroflexota	c__Anaerolineae	o__Anaerolineales	f__DRMV01	g__DUEP01	s__DUEP01 sp011176535
1023_1	GCA_011176545	public genome	1	1	0	0	nothing_new_here	p__Chloroflexota	c__Anaerolineae	o__DUEN01	f__DUEN01	g__DUEN01	s__DUEN01 sp011176545
332_2	GCA_011191875	public genome	1	1	0	0	nothing_new_here	p__Chloroflexota	c__Dehalococcoidia	o__Dehalococcoidales	f__UBA5760	g__W498	s__W498 sp011191875
454_1	GCA_011191975	public genome	1	1	0	0	nothing_new_here	p__Chloroflexota	c__Dehalococcoidia	o__Dehalococcoidales	f__UBA2162	g__MGML01	s__MGML01 sp011191975
280_0	GCA_011191985	public genome	1	1	0	0	nothing_new_here	p__Chloroflexota	c__Dehalococcoidia	o__Dehalococcoidales	f__W111	g__W111	s__W111 sp011191985
745_0	GCA_011192015	public genome	1	1	0	0	nothing_new_here	p__Chloroflexota	c__Anaerolineae	o__Anaerolineales	f__E44-bin32	g__W1033	s__W1033 sp011192015
333_0	GCA_011192075	public genome	1	1	0	0	nothing_new_here	p__Chloroflexota	c__Dehalococcoidia	o__Dehalococcoidales	f__UBA5760	g__S120	s__S120 sp011192075
513_0	GCA_011192125	public genome	1	1	0	0	nothing_new_here	p__Chloroflexota	c__Anaerolineae	o__B4-G1	f__DUEL01	g__DUEL01	s__DUEL01 sp011192125
514_1	GCA_011192155	public genome	2	2	0	0	nothing_new_here	p__Chloroflexota	c__Anaerolineae	o__B4-G1	f__B4-G1	g__B4-G1	s__B4-G1 sp003648025
507_5	GCA_011192185	public genome	1	1	0	0	nothing_new_here	p__Chloroflexota	c__Anaerolineae	o__B4-G1	f__B4-G1	g__B30-G15	s__B30-G15 sp003648085
762_1	GCA_011322445	public genome	2	2	0	0	nothing_new_here	p__Chloroflexota	c__Anaerolineae	o__Anaerolineales	f__DRMV01	g__DRMV01	s__DRMV01 sp011322445
411_1	GCA_011328975	public genome	2	1	1	0	old+new_onlyMAGsSRA	p__Chloroflexota	c__Dehalococcoidia	o__Dehalococcoidales	f__UBA3254	g__UBA3254	s__UBA3254 sp011328975
708_1	GCA_011329365	public genome	2	1	1	0	old+new_onlyMAGsSRA	p__Chloroflexota	c__Anaerolineae	o__Anaerolineales	f__UBA4823	g__DSTM01	s__DSTM01 sp011329365
243_1	GCA_011362805	public genome	2	1	1	0	old+new_onlyMAGsSRA	p__Chloroflexota	c__Anaerolineae	o__4572-78	f__NAK82	g__NAK82	s__NAK82 sp011362805
412_1	GCA_011373495	public genome	2	1	1	0	old+new_onlyMAGsSRA	p__Chloroflexota	c__Dehalococcoidia	o__SM23-28-2	f__HRbin24	g__DRWY01	s__DRWY01 sp011373495
409_4	GCA_011380505	public genome	2	1	1	0	old+new_onlyMAGsSRA	p__Chloroflexota	c__Dehalococcoidia	o__SM23-28-2	f__HRbin24	g__HRBIN24	s__HRBIN24 sp011380505
933_1	GCA_011388535	public genome	2	1	1	0	old+new_onlyMAGsSRA	p__Chloroflexota	c__Chloroflexia	o__DTKN01	f__DTKN01	g__DRUS01	s__DRUS01 sp011388535
385_5	GCA_011523365	public genome	1	1	0	0	nothing_new_here	p__Chloroflexota	c__Anaerolineae	o__Caldilineales	f__Caldilineaceae	g__Bin5	s__Bin5 sp011523365
728_1	GCA_011523615	public genome	2	1	1	0	old+new_onlyMAGsSRA	p__Chloroflexota	c__Anaerolineae	o__SBR1031	f__A4b	g__WTGJ01	s__WTGJ01 sp011523615
958_5	GCA_011523705	public genome	1	1	0	0	nothing_new_here	p__Chloroflexota	c__Anaerolineae	o__SBR1031	f__A4b	g__UBA6055	s__UBA6055 sp011523705
959_2	GCA_011523735	public genome	1	1	0	0	nothing_new_here	p__Chloroflexota	c__Anaerolineae	o__SBR1031	f__A4b	g__UBA6055	s__UBA6055 sp011523735
388_1	GCA_011523785	public genome	1	1	0	0	nothing_new_here	p__Chloroflexota	c__UBA11872	o__UBA11872	f__UBA11872	g__UBA11872	s__UBA11872 sp011523785
329_0	GCA_011524645	public genome	1	1	0	0	nothing_new_here	p__Chloroflexota	c__Anaerolineae	o__Promineofilales	f__Promineofilaceae	g__WTJY01	s__WTJY01 sp011524645
958_1	GCA_011525385	public genome	1	1	0	0	nothing_new_here	p__Chloroflexota	c__Anaerolineae	o__SBR1031	f__A4b	g__UBA6055	s__UBA6055 sp011525385
1002_0	GCA_011525915	public genome	1	1	0	0	nothing_new_here	p__Chloroflexota	c__Anaerolineae	o__Promineofilales	f__Promineofilaceae	g__CAADGU01	s__CAADGU01 sp011525915
768_0	GCA_011620555	public genome	1	1	0	0	nothing_new_here	p__Chloroflexota	c__Anaerolineae	o__Anaerolineales	f__Anaerolineaceae	g__Brevefilum	s__Brevefilum sp011620555
262_0	GCA_011772595	public genome	1	1	0	0	nothing_new_here	p__Chloroflexota	c__Anaerolineae	o__Anaerolineales	f__E44-bin32	g__	s__
642_2	GCA_012026785	public genome	1	1	0	0	nothing_new_here	p__Chloroflexota	c__Ellin6529	o__CSP1-4	f__CSP1-4	g__UBA5189	s__UBA5189 sp012026785
570_0	GCA_012031225	public genome	1	1	0	0	nothing_new_here	p__Chloroflexota	c__Chloroflexia	o__Chloroflexales	f__Chloroflexaceae	g__JAAUTZ01	s__JAAUTZ01 sp012031225
560_2	GCA_012032475	public genome	1	1	0	0	nothing_new_here	p__Chloroflexota	c__Chloroflexia	o__Chloroflexales	f__Chloroflexaceae	g__JAAUSY01	s__JAAUSY01 sp012032475
1011_3	GCA_012032575	public genome	1	1	0	0	nothing_new_here	p__Chloroflexota	c__Anaerolineae	o__4572-78	f__J111	g__DSQQ01	s__DSQQ01 sp012032575
569_0	GCA_012032775	public genome	1	1	0	0	nothing_new_here	p__Chloroflexota	c__Chloroflexia	o__Chloroflexales	f__Chloroflexaceae	g__JAAUQO01	s__JAAUQO01 sp012032775
559_0	GCA_012034075	public genome	1	1	0	0	nothing_new_here	p__Chloroflexota	c__Chloroflexia	o__Chloroflexales	f__Chloroflexaceae	g__JAAURD01	s__JAAURD01 sp012034075
761_2	GCA_012512625	public genome	1	1	0	0	nothing_new_here	p__Chloroflexota	c__Anaerolineae	o__Anaerolineales	f__Anaerolineaceae	g__T78	s__
525_0	GCA_012514315	public genome	1	1	0	0	nothing_new_here	p__Chloroflexota	c__Anaerolineae	o__B4-G1	f__B4-G1	g__JAAZAN01	s__JAAZAN01 sp012514315
376_0	GCA_012520835	public genome	1	1	0	0	nothing_new_here	p__Chloroflexota	c__Dehalococcoidia	o__Dehalococcoidales	f__UBA5627	g__UBA5627	s__UBA5627 sp012520835
980_0	GCA_012689325	public genome	1	1	0	0	nothing_new_here	p__Chloroflexota	c__Anaerolineae	o__JAAYEA01	f__JAAYEA01	g__JAAYEA01	s__JAAYEA01 sp012689325
274_0	GCA_012719135	public genome	1	1	0	0	nothing_new_here	p__Chloroflexota	c__Anaerolineae	o__UBA1429	f__UBA1429	g__JAAYED01	s__JAAYED01 sp012719135
604_0	GCA_012729455	public genome	1	1	0	0	nothing_new_here	p__Chloroflexota	c__Anaerolineae	o__UBA1429	f__UBA1429	g__JAAYDC01	s__JAAYDC01 sp012729455
129_0	GCA_012729755	public genome	1	1	0	0	nothing_new_here	p__Chloroflexota	c__Anaerolineae	o__Anaerolineales	f__Anaerolineaceae	g__T78	s__T78 sp012729755
971_0	GCA_012729765	public genome	1	1	0	0	nothing_new_here	p__Chloroflexota	c__Anaerolineae	o__SBR1031	f__UBA2029	g__JAAYCM01	s__JAAYCM01 sp012729765
311_1	GCA_012797815	public genome	1	1	0	0	nothing_new_here	p__Chloroflexota	c__Anaerolineae	o__Anaerolineales	f__Anaerolineaceae	g__UBA4781	s__UBA4781 sp012797815
135_2	GCA_012797895	public genome	1	1	0	0	nothing_new_here	p__Chloroflexota	c__Anaerolineae	o__Anaerolineales	f__Anaerolineaceae	g__Ornatilinea	s__
310_1	GCA_012797975	public genome	2	1	1	0	old+new_onlyMAGsSRA	p__Chloroflexota	c__Anaerolineae	o__Anaerolineales	f__Anaerolineaceae	g__UBA4781	s__UBA4781 sp012797975
138_0	GCA_012798185	public genome	1	1	0	0	nothing_new_here	p__Chloroflexota	c__Anaerolineae	o__Anaerolineales	f__UBA4823	g__JAAZNS01	s__JAAZNS01 sp012798185
311_2	GCA_012798455	public genome	1	1	0	0	nothing_new_here	p__Chloroflexota	c__Anaerolineae	o__Anaerolineales	f__Anaerolineaceae	g__UBA4781	s__UBA4781 sp012798455
102_1	GCA_012798535	public genome	2	1	1	0	old+new_onlyMAGsSRA	p__Chloroflexota	c__Anaerolineae	o__Anaerolineales	f__Anaerolineaceae	g__Leptolinea	s__Leptolinea sp012798535
795_0	GCA_012799995	public genome	1	1	0	0	nothing_new_here	p__Chloroflexota	c__Anaerolineae	o__Anaerolineales	f__Anaerolineaceae	g__Flexilinea	s__Flexilinea sp012799995
1202_1	GCA_012839565	public genome	2	1	1	0	old+new_onlyMAGsSRA	p__Chloroflexota	c__Anaerolineae	o__Anaerolineales	f__Anaerolineaceae	g__T78	s__T78 sp012839565
1021_1	GCA_012842785	public genome	1	1	0	0	nothing_new_here	p__Chloroflexota	c__Anaerolineae	o__Caldilineales	f__Caldilineaceae	g__Caldilinea	s__Caldilinea sp002391565
492_2	GCA_012959315	public genome	1	1	0	0	nothing_new_here	p__Chloroflexota	c__Dehalococcoidia	o__UBA1151	f__UBA1151	g__GCA-2730555	s__
462_2	GCA_012959765	public genome	1	1	0	0	nothing_new_here	p__Chloroflexota	c__Dehalococcoidia	o__UBA1151	f__Bin127	g__UBA1328	s__UBA1328 sp012959765
356_0	GCA_012974295	public genome	1	1	0	0	nothing_new_here	p__Chloroflexota	c__Dehalococcoidia	o__SZUA-161	f__E44-bin15	g__JAAXQM01	s__JAAXQM01 sp012974295
700_0	GCA_013044295	public genome	1	1	0	0	nothing_new_here	p__Dormibacterota	c__Dormibacteria	o__UBA8260	f__Bog-877	g__AG-12	s__AG-12 sp013044295
952_0	GCA_013112675	public genome	1	1	0	0	nothing_new_here	p__Chloroflexota	c__Anaerolineae	o__SBR1031	f__A4b	g__OLB13	s__OLB13 sp001567485
883_2	GCA_013112685	public genome	1	1	0	0	nothing_new_here	p__Chloroflexota	c__Anaerolineae	o__Anaerolineales	f__EnvOPS12	g__OLB14	s__OLB14 sp013112685
1082_0	GCA_013122415	public genome	1	1	0	0	nothing_new_here	p__Chloroflexota	c__Chloroflexia	o__Chloroflexales	f__Roseiflexaceae	g__AL-N1	s__AL-N1 sp013122435
868_2	GCA_013140605	public genome	1	1	0	0	nothing_new_here	p__Chloroflexota	c__Anaerolineae	o__Anaerolineales	f__EnvOPS12	g__OLB14	s__OLB14 sp013140605
313_0	GCA_013151415	public genome	1	1	0	0	nothing_new_here	p__Chloroflexota	c__Anaerolineae	o__Caldilineales	f__J102	g__JAADII01	s__JAADII01 sp013151415
786_0	GCA_013152325	public genome	1	1	0	0	nothing_new_here	p__Chloroflexota	c__Anaerolineae	o__Anaerolineales	f__EnvOPS12	g__NIOZ-UU36	s__NIOZ-UU36 sp013152325
1023_2	GCA_013152435	public genome	1	1	0	0	nothing_new_here	p__Chloroflexota	c__Anaerolineae	o__DUEN01	f__DUEN01	g__DUEN01	s__DUEN01 sp013152435
323_0	GCA_013152585	public genome	1	1	0	0	nothing_new_here	p__Chloroflexota	c__Anaerolineae	o__Caldilineales	f__J102	g__JAADGC01	s__JAADGC01 sp013152585
1133_0	GCA_013154135	public genome	1	1	0	0	nothing_new_here	p__Chloroflexota	c__Anaerolineae	o__Caldilineales	f__JAADDB01	g__JAADDB01	s__JAADDB01 sp013154135
774_0	GCA_013177815	public genome	1	1	0	0	nothing_new_here	p__Chloroflexota	c__Anaerolineae	o__Anaerolineales	f__Anaerolineaceae	g__JABLXM01	s__JABLXM01 sp013177815
608_0	GCA_013178015	public genome	1	1	0	0	nothing_new_here	p__Chloroflexota	c__Anaerolineae	o__DRVO01	f__DRVO01	g__Ch71	s__Ch71 sp013178015
326_0	GCA_013178095	public genome	1	1	0	0	nothing_new_here	p__Chloroflexota	c__Anaerolineae	o__Anaerolineales	f__Anaerolineaceae	g__Pelolinea	s__Pelolinea sp013178095
115_0	GCA_013178185	public genome	1	1	0	0	nothing_new_here	p__Chloroflexota	c__Anaerolineae	o__Anaerolineales	f__Anaerolineaceae	g__Ch132	s__Ch132 sp013178185
397_0	GCA_013203045	public genome	1	1	0	0	nothing_new_here	p__Chloroflexota	c__Dehalococcoidia	o__SZUA-161	f__SpSt-899	g__JABMQN01	s__JABMQN01 sp013203045
464_0	GCA_013204545	public genome	1	1	0	0	nothing_new_here	p__Chloroflexota	c__Dehalococcoidia	o__UBA1151	f__Bin127	g__UBA1328	s__UBA1328 sp013204545
1141_0	GCA_013204555	public genome	1	1	0	0	nothing_new_here	p__Chloroflexota	c__Dehalococcoidia	o__UBA1151	f__UBA1151	g__UBA1151	s__UBA1151 sp013204555
438_2	GCA_013204585	public genome	1	1	0	0	nothing_new_here	p__Chloroflexota	c__Dehalococcoidia	o__UBA3495	f__UBA3495	g__UBA9611	s__UBA9611 sp013204585
589_0	GCA_013336035	public genome	1	1	0	0	nothing_new_here	p__Chloroflexota	c__Chloroflexia	o__Chloroflexales	f__Chloroflexaceae	g__CAIWXH01	s__
946_1	GCA_013360465	public genome	1	1	0	0	nothing_new_here	p__Chloroflexota	c__Anaerolineae	o__SBR1031	f__A4b	g__OLB15	s__OLB15 sp013360465
890_1	GCA_013360875	public genome	2	1	1	0	old+new_onlyMAGsSRA	p__Chloroflexota	c__Anaerolineae	o__Anaerolineales	f__EnvOPS12	g__UBA12294	s__UBA12294 sp013360875
579_1	GCA_013388755	public genome	2	1	1	0	old+new_onlyMAGsSRA	p__Chloroflexota	c__Chloroflexia	o__Chloroflexales	f__Roseiflexaceae	g__JACAEQ01	s__JACAEQ01 sp013388755
885_1	GCA_013388795	public genome	1	1	0	0	nothing_new_here	p__Chloroflexota	c__Anaerolineae	o__Anaerolineales	f__EnvOPS12	g__OLB14	s__OLB14 sp013388795
353_5	GCA_013388845	public genome	1	1	0	0	nothing_new_here	p__Chloroflexota	c__Dehalococcoidia	o__GIF9	f__AB-539-J10	g__JACAEN01	s__JACAEN01 sp013388845
276_0	GCA_013390565	public genome	1	1	0	0	nothing_new_here	p__Chloroflexota	c__Chloroflexia	o__54-19	f__54-19	g__L227-S17	s__L227-S17 sp013390565
261_0	GCA_013390945	public genome	1	1	0	0	nothing_new_here	p__Chloroflexota	c__Chloroflexia	o__54-19	f__54-19	g__L227-5C	s__L227-5C sp013390945
1068_0	GCA_013538855	public genome	1	1	0	0	nothing_new_here	p__Chloroflexota	c__Chloroflexia	o__Chloroflexales	f__Herpetosiphonaceae	g__OHK22	s__OHK22 sp013538855
1043_0	GCA_013693795	public genome	1	1	0	0	nothing_new_here	p__Chloroflexota	c__Anaerolineae	o__CG2-30-64-16	f__SSC4	g__SSC4	s__SSC4 sp013693795
230_0	GCA_013697005	public genome	1	1	0	0	nothing_new_here	p__Chloroflexota	c__Chloroflexia	o__Thermomicrobiales	f__UBA6265	g__JACCXM01	s__JACCXM01 sp013697005
707_0	GCA_013697395	public genome	1	1	0	0	nothing_new_here	p__Chloroflexota	c__Ellin6529	o__QHBO01	f__QHBO01	g__JACDBZ01	s__JACDBZ01 sp013697395
645_3	GCA_013698095	public genome	1	1	0	0	nothing_new_here	p__Chloroflexota	c__Ellin6529	o__CSP1-4	f__CSP1-4	g__CF-46	s__CF-46 sp013698095
600_0	GCA_013698285	public genome	1	1	0	0	nothing_new_here	p__Chloroflexota	c__Chloroflexia	o__Thermomicrobiales	f__UBA6265	g__JACCVE01	s__JACCVE01 sp013698285
706_0	GCA_013816405	public genome	1	1	0	0	nothing_new_here	p__Chloroflexota	c__Ellin6529	o__QHBO01	f__QHBO01	g__CF-167	s__CF-167 sp013816405
101_0	GCA_013821605	public genome	1	1	0	0	nothing_new_here	p__Chloroflexota	c__Chloroflexia	o__Chloroflexales	f__Herpetosiphonaceae	g__JACDGP01	s__JACDGP01 sp013821605
70_0	GCA_013821665	public genome	1	1	0	0	nothing_new_here	p__Chloroflexota	c__Anaerolineae	o__SBR1031	f__A4b	g__CFX2	s__
972_2	GCA_014338005	public genome	1	1	0	0	nothing_new_here	p__Chloroflexota	c__Anaerolineae	o__SBR1031	f__A4b	g__CFX2	s__CFX2 sp014338005
529_0	GCA_014360745	public genome	1	1	0	0	nothing_new_here	p__Chloroflexota	c__Anaerolineae	o__UBA1429	f__UBA1429	g__SKLG01	s__
1090_0	GCA_014360755	public genome	1	1	0	0	nothing_new_here	p__Chloroflexota	c__Anaerolineae	o__UBA2200	f__UBA2200	g__JACIWX01	s__JACIWX01 sp014360755
241_1	GCA_014360805	public genome	1	1	0	0	nothing_new_here	p__Chloroflexota	c__Anaerolineae	o__DTPP01	f__DTLA01	g__DTLA01	s__DTLA01 sp014360805
585_0	GCA_014360825	public genome	1	1	0	0	nothing_new_here	p__Chloroflexota	c__Anaerolineae	o__UBA2200	f__JACIWT01	g__JACIWT01	s__JACIWT01 sp014360825
752_1	GCA_014360845	public genome	1	1	0	0	nothing_new_here	p__Chloroflexota	c__Anaerolineae	o__E26-bin7	f__JACIWR01	g__JACIWR01	s__JACIWR01 sp014360845
910_1	GCA_014360855	public genome	2	1	1	0	old+new_onlyMAGsSRA	p__Chloroflexota	c__Anaerolineae	o__DTPP01	f__JACIWP01	g__JACIWP01	s__JACIWP01 sp014360855
921_6	GCA_014360895	public genome	1	1	0	0	nothing_new_here	p__Chloroflexota	c__Anaerolineae	o__B4-G1	f__DUEL01	g__SpSt-77	s__SpSt-77 sp014360895
1091_0	GCA_014360905	public genome	1	1	0	0	nothing_new_here	p__Chloroflexota	c__Anaerolineae	o__UBA2200	f__UBA2200	g__JACIWX01	s__JACIWX01 sp014360905
829_0	GCA_014379595	public genome	1	1	0	0	nothing_new_here	p__Chloroflexota	c__Anaerolineae	o__Anaerolineales	f__EnvOPS12	g__OLB14	s__OLB14 sp014379595
132_0	GCA_014382535	public genome	1	1	0	0	nothing_new_here	p__Chloroflexota	c__Anaerolineae	o__Anaerolineales	f__EnvOPS12	g__NIOZ-UU36	s__NIOZ-UU36 sp014382535
509_0	GCA_014383605	public genome	1	1	0	0	nothing_new_here	p__Chloroflexota	c__Anaerolineae	o__UBA3071	f__UBA3071	g__NIOZ-UU15	s__NIOZ-UU15 sp014383605
878_1	GCA_014584545	public genome	1	1	0	0	nothing_new_here	p__Chloroflexota	c__Anaerolineae	o__Anaerolineales	f__EnvOPS12	g__UBA12294	s__UBA12294 sp002050275
963_3	GCA_014584575	public genome	1	1	0	0	nothing_new_here	p__Chloroflexota	c__Anaerolineae	o__Promineofilales	f__Promineofilaceae	g__CAADGU01	s__CAADGU01 sp014584575
245_0	GCA_014672715	public genome	1	1	0	0	nothing_new_here	p__Chloroflexota	c__Dehalococcoidia	o__Dehalococcoidales	f__Dehalococcoidaceae	g__Dehalogenimonas	s__Dehalogenimonas sp002878295
390_0	GCA_014859065	public genome	1	1	0	0	nothing_new_here	p__Chloroflexota	c__Anaerolineae	o__Anaerolineales	f__UBA4823	g__	s__
494_0	GCA_014859215	public genome	1	1	0	0	nothing_new_here	p__Chloroflexota	c__Dehalococcoidia	o__SZUA-161	f__SZUA-161	g__	s__
536_0	GCA_014860315	public genome	1	1	0	0	nothing_new_here	p__Chloroflexota	c__Dehalococcoidia	o__UBA2991	f__UBA2991	g__41671	s__
876_3	GCA_014860745	public genome	1	1	0	0	nothing_new_here	p__Chloroflexota	c__Anaerolineae	o__Anaerolineales	f__EnvOPS12	g__OLB14	s__
875_5	GCA_014860805	public genome	1	1	0	0	nothing_new_here	p__Chloroflexota	c__Anaerolineae	o__Anaerolineales	f__EnvOPS12	g__OLB14	s__
425_1	GCA_014874385	public genome	1	1	0	0	nothing_new_here	p__Chloroflexota	c__Dehalococcoidia	o__SZUA-161	f__SZUA-161	g__	s__
563_2	GCA_014874455	public genome	1	1	0	0	nothing_new_here	p__Chloroflexota	c__Chloroflexia	o__Thermomicrobiales	f__Thermomicrobiaceae	g__HRBIN26	s__
921_2	GCA_014874475	public genome	1	1	0	0	nothing_new_here	p__Chloroflexota	c__Anaerolineae	o__B4-G1	f__DUEL01	g__SpSt-77	s__
241_4	GCA_014874485	public genome	1	1	0	0	nothing_new_here	p__Chloroflexota	c__Anaerolineae	o__DTPP01	f__DTLA01	g__DTLA01	s__
1102_0	GCA_014879345	public genome	1	1	0	0	nothing_new_here	p__Chloroflexota	c__Anaerolineae	o__Promineofilales	f__Promineofilaceae	g__GCA-2746795	s__
315_2	GCA_014879665	public genome	1	1	0	0	nothing_new_here	p__Chloroflexota	c__Anaerolineae	o__SBR1031	f__A4b	g__OLB15	s__
1042_2	GCA_014879765	public genome	1	1	0	0	nothing_new_here	p__Chloroflexota	c__Anaerolineae	o__Caldilineales	f__JAAEKA01	g__JAAEKA01	s__
951_0	GCA_014879865	public genome	1	1	0	0	nothing_new_here	p__Chloroflexota	c__Anaerolineae	o__SBR1031	f__A4b	g__OLB15	s__
1010_1	GCA_015075185	public genome	1	1	0	0	nothing_new_here	p__Chloroflexota	c__Anaerolineae	o__4572-78	f__J111	g__DSQQ01	s__
878_2	GCA_015075275	public genome	1	1	0	0	nothing_new_here	p__Chloroflexota	c__Anaerolineae	o__Anaerolineales	f__EnvOPS12	g__UBA12294	s__
1011_2	GCA_015075405	public genome	1	1	0	0	nothing_new_here	p__Chloroflexota	c__Anaerolineae	o__4572-78	f__J111	g__DSQQ01	s__
541_2	GCA_015075555	public genome	1	1	0	0	nothing_new_here	p__Chloroflexota	c__Dehalococcoidia	o__UBA2991	f__UBA2991	g__UCB2	s__
882_2	GCA_015075725	public genome	1	1	0	0	nothing_new_here	p__Chloroflexota	c__Anaerolineae	o__Anaerolineales	f__EnvOPS12	g__OLB14	s__OLB14 sp008363285
963_1	GCA_015075765	public genome	1	1	0	0	nothing_new_here	p__Chloroflexota	c__Anaerolineae	o__Promineofilales	f__Promineofilaceae	g__CAADGU01	s__CAADGU01 sp013112725
42_0	GCA_015099395	public genome	1	1	0	0	nothing_new_here	p__Chloroflexota	c__Ktedonobacteria	o__Ktedonobacterales	f__Ktedonobacteraceae	g__Dictyobacter	s__
680_0	GCA_015478665	public genome	1	1	0	0	nothing_new_here	p__Chloroflexota	c__Dehalococcoidia	o__DSTF01	f__	g__	s__
58_0	GCA_015478675	public genome	1	1	0	0	nothing_new_here	p__Chloroflexota	c__Chloroflexia	o__54-19	f__	g__	s__
644_0	GCA_015478725	public genome	1	1	0	0	nothing_new_here	p__Chloroflexota	c__Ellin6529	o__CSP1-4	f__CSP1-4	g__C-114	s__
1005_0	GCA_015486215	public genome	1	1	0	0	nothing_new_here	p__Chloroflexota	c__Anaerolineae	o__Promineofilales	f__Promineofilaceae	g__GCA-2746795	s__
32_1	GCA_015486235	public genome	1	1	0	0	nothing_new_here	p__Chloroflexota	c__Anaerolineae	o__Caldilineales	f__	g__	s__
1099_0	GCA_015486785	public genome	1	1	0	0	nothing_new_here	p__Chloroflexota	c__Anaerolineae	o__B4-G1	f__SLSP01	g__JAAAOZ01	s__
33_0	GCA_015486845	public genome	1	1	0	0	nothing_new_here	p__Chloroflexota	c__Anaerolineae	o__Caldilineales	f__JAADDB01	g__	s__
32_2	GCA_015486895	public genome	1	1	0	0	nothing_new_here	p__Chloroflexota	c__Anaerolineae	o__Caldilineales	f__JAADDB01	g__	s__
327_2	GCA_015487975	public genome	1	1	0	0	nothing_new_here	p__Chloroflexota	c__Anaerolineae	o__Ardenticatenales	f__Ardenticatenaceae	g__Ardenticatena	s__
1134_0	GCA_015490995	public genome	1	1	0	0	nothing_new_here	p__Chloroflexota	c__Anaerolineae	o__Caldilineales	f__JAADDB01	g__JAADDB01	s__
328_2	GCA_015491235	public genome	1	1	0	0	nothing_new_here	p__Chloroflexota	c__Anaerolineae	o__Ardenticatenales	f__Ardenticatenaceae	g__	s__
1109_0	GCA_015500095	public genome	1	1	0	0	nothing_new_here	p__Chloroflexota	c__Anaerolineae	o__SBR1031	f__A4b	g__GCA-2699585	s__
398_0	GCA_015661155	public genome	1	1	0	0	nothing_new_here	p__Chloroflexota	c__Dehalococcoidia	o__UBA2985	f__UBA2985	g__	s__
449_0	GCA_016178045	public genome	1	1	0	0	nothing_new_here	p__Chloroflexota	c__Dehalococcoidia	o__SM23-28-2	f__RBG-16-64-32	g__	s__
903_2	GCA_016179765	public genome	1	1	0	0	nothing_new_here	p__Chloroflexota	c__Dehalococcoidia	o__UBA6952	f__SHYF01	g__	s__
399_0	GCA_016179845	public genome	1	1	0	0	nothing_new_here	p__Chloroflexota	c__Dehalococcoidia	o__UBA1127	f__	g__	s__
234_0	GCA_016183425	public genome	1	1	0	0	nothing_new_here	p__Chloroflexota	c__Dehalococcoidia	o__	f__	g__	s__
618_0	GCA_016183435	public genome	1	1	0	0	nothing_new_here	p__Chloroflexota	c__Ellin6529	o__P2-11E	f__P2-11E	g__GWC2-70-10	s__
364_0	GCA_016183485	public genome	1	1	0	0	nothing_new_here	p__Chloroflexota	c__Dehalococcoidia	o__Dehalococcoidales	f__UBA2162	g__	s__
351_0	GCA_016190665	public genome	1	1	0	0	nothing_new_here	p__Chloroflexota	c__Dehalococcoidia	o__	f__	g__	s__
640_2	GCA_016191395	public genome	1	1	0	0	nothing_new_here	p__Chloroflexota	c__Ellin6529	o__CSP1-4	f__CSP1-4	g__UBA5189	s__
857_1	GCA_016191495	public genome	2	2	0	0	nothing_new_here	p__Chloroflexota	c__Anaerolineae	o__Anaerolineales	f__EnvOPS12	g__Fen-1038	s__
842_1	GCA_016191845	public genome	1	1	0	0	nothing_new_here	p__Chloroflexota	c__Anaerolineae	o__Anaerolineales	f__EnvOPS12	g__	s__
784_0	GCA_016191875	public genome	1	1	0	0	nothing_new_here	p__Chloroflexota	c__Anaerolineae	o__Anaerolineales	f__UBA11579	g__SCUK01	s__
901_0	GCA_016197225	public genome	1	1	0	0	nothing_new_here	p__Chloroflexota	c__Anaerolineae	o__Anaerolineales	f__UBA6663	g__	s__
912_0	GCA_016202425	public genome	1	1	0	0	nothing_new_here	p__Chloroflexota	c__Dehalococcoidia	o__UBA6952	f__SHYF01	g__	s__
558_0	GCA_016208315	public genome	1	1	0	0	nothing_new_here	p__Chloroflexota	c__Anaerolineae	o__UBA4142	f__UBA4142	g__	s__
890_4	GCA_016208405	public genome	1	1	0	0	nothing_new_here	p__Chloroflexota	c__Anaerolineae	o__Anaerolineales	f__EnvOPS12	g__UBA12294	s__
1112_2	GCA_016209205	public genome	1	1	0	0	nothing_new_here	p__Chloroflexota	c__Anaerolineae	o__UBA4142	f__SHND01	g__SHND01	s__
986_0	GCA_016210205	public genome	1	1	0	0	nothing_new_here	p__Chloroflexota	c__Dehalococcoidia	o__	f__	g__	s__
452_0	GCA_016210545	public genome	1	1	0	0	nothing_new_here	p__Chloroflexota	c__Dehalococcoidia	o__JdFR-54	f__	g__	s__
801_0	GCA_016210565	public genome	1	1	0	0	nothing_new_here	p__Chloroflexota	c__Dehalococcoidia	o__UBA2247	f__	g__	s__
553_0	GCA_016210585	public genome	1	1	0	0	nothing_new_here	p__Chloroflexota	c__Dehalococcoidia	o__Dehalococcoidales	f__UBA3254	g__	s__
842_2	GCA_016213105	public genome	1	1	0	0	nothing_new_here	p__Chloroflexota	c__Anaerolineae	o__Anaerolineales	f__EnvOPS12	g__	s__
1111_0	GCA_016215025	public genome	1	1	0	0	nothing_new_here	p__Chloroflexota	c__Anaerolineae	o__UBA4142	f__UBA4142	g__UBA4142	s__
973_0	GCA_016223085	public genome	1	1	0	0	nothing_new_here	p__Chloroflexota	c__Anaerolineae	o__SBR1031	f__A4b	g__CFX2	s__
1116_0	GCA_016223105	public genome	1	1	0	0	nothing_new_here	p__Chloroflexota	c__Anaerolineae	o__UBA4142	f__UBA4142	g__	s__
543_0	GCA_016234445	public genome	1	1	0	0	nothing_new_here	p__Chloroflexota	c__Dehalococcoidia	o__UBA2991	f__UBA2991	g__UCB2	s__
843_2	GCA_016234485	public genome	1	1	0	0	nothing_new_here	p__Chloroflexota	c__Anaerolineae	o__Anaerolineales	f__EnvOPS12	g__UBA7227	s__
869_0	GCA_016234495	public genome	1	1	0	0	nothing_new_here	p__Chloroflexota	c__Anaerolineae	o__Anaerolineales	f__EnvOPS12	g__OLB14	s__
[truncated: 703 more rows]
