# Supplementary material for: Taxonomic Re-Classification and Expansion of the Phylum Chloroflexota Based on over 5000 Genomes and Metagenome-Assembled Genomes
Source: Microorganisms. 2023 Oct 23;11(10):2612. doi: 10.3390/microorganisms11102612 (PMC10608941; doi:10.3390/microorganisms11102612)
Supplement: Supplementary file 1 [file microorganisms-11-02612-s001.zip › Table_S5_Overview_MAGs.xlsx]

## Sheet: Sheet3
# metagenomes in total	1127
# metagenomes used for assembly	866
# assemblies	242
# binnings	326
#fastas after 3 binning algorithms	146274
#MAGs after DAS_tool or selection by deduplication (ANI 0.99)	61649
MAGS after removal (< 50000 bp)	61569
MAGS after removal ( comp 25 cont 20)	38273
#MAGs after category-internal deduplication (ANI 0.99)	23416
#MAGs after complete deduplication (ANI 0.99)	22943
Chloroflexi+Dormi MAGs to MDMcleaner	3099 (Chloro/Dormi) + 22 unclassified
Chloroflexi+Dormi MAGs after MDMcleaner and 2. GTDBtk	3048
Medium quality
MAGS > 50% comp; < 10% cont (checkM, Magpurify, mdmcleaner)	5356
public	3456
binning	1826
samples	76
Species-level clusters	3509
nothing_new	2056	nothing_new_here
new_binning	1002	new_MAGsra	1056
new_samples	49	new_MAGsamp
new_binning+samples	5	new_MAGsra+samp
	6	mostly_new_MAGsra (old MAG is best)	397
	1	mostly_new_MAGsra+samp (old MAG is best)
	0	mostly_new_MAGsamp (old MAG is best)
	167	old+new_MAGsra (old MAG is best)
	7	old+new_MAGsra+samp (old MAG is best)
	0	old+new_MAGsamp (old MAG is best)
	22	mostly_old_MAGsra (old MAG is best)
	0	mostly_old_MAGsra+samp (old MAG is best)
	0	mostly_old_MAGsamp (old MAG is best)
	14	mostly_new_MAGsra (new MAG is best)
	4	mostly_new_MAGsra+samp (new MAG is best)
	0	mostly_new_MAGsamp (new MAG is best)
	162	old+new_MAGsra (new MAG is best)
	9	old+new_MAGsamp (new MAG is best)
	0	old+new_MAGsra+samp (new MAG is best)
	5	mostly_old_MAGsra (new MAG is best)
	0	mostly_old_MAGsra+samp (new MAG is best)
	0	mostly_old_MAGsamp (new MAG is best)
clusters with new MAGs_binning	1398
clusters with new MAGs_samples	76
Taxonomy of clusters where old genomes are best
p__Dormibacterota	101
p__Chloroflexota	1955
Taxonomy of clusters where our MAGs are best	1250
p__Dormibacterota	11
p__Chloroflexota	1239
NOT classified on class level	1	1 new class
NOT classified on order level	8	new order
NOT classified on family level	55	new families
NOT classified on genus level	347	new genera
NOT classified on species level	748	748 new species
fully classified	91	91 fully classified
High quality
MAGS > 90% comp; < 5% cont (checkM, Magpurify, mdmcleaner)	1874
public	1162
binning	674
samples	38
Species-level clusters	1486
nothing_new	850	nothing_new_here
new_binning	446	new_MAGsra	470
new_samples	23	new_MAGsamp
new_binning+samples	1	new_MAGsra+samp
	1	mostly_new_MAGsra (old MAG is best)	166
	0	mostly_new_MAGsra+samp (old MAG is best)
	0	mostly_new_MAGsamp (old MAG is best)
	85	old+new_MAGsra (old MAG is best)
	2	old+new_MAGsra+samp (old MAG is best)
	2	old+new_MAGsamp (old MAG is best)
	5	mostly_old_MAGsra (old MAG is best)
	0	mostly_old_MAGsra+samp (old MAG is best)
	0	mostly_old_MAGsamp (old MAG is best)
	2	mostly_new_MAGsra (new MAG is best)
	4	mostly_new_MAGsra+samp (new MAG is best)
	0	mostly_new_MAGsamp (new MAG is best)
	57	old+new_MAGsra (new MAG is best)
	4	old+new_MAGsra+samp (new MAG is best)
	2	old+new_MAGsamp (new MAG is best)
	2	mostly_old_MAGsra (new MAG is best)
	0	mostly_old_MAGsra+samp (new MAG is best)
	0	mostly_old_MAGsamp (new MAG is best)
clusters with new MAGs_binning	609
clusters with new MAGs_samples	38
Taxonomy of clusters where old genomes are best
p__Dormibacterota	46
p__Chloroflexota	899
Taxonomy of clusters where our MAGs are best
p__Dormibacterota	2
p__Chloroflexota	539
