# Supplementary material for: Taxonomic Re-Classification and Expansion of the Phylum Chloroflexota Based on over 5000 Genomes and Metagenome-Assembled Genomes
Source: Microorganisms. 2023 Oct 23;11(10):2612. doi: 10.3390/microorganisms11102612 (PMC10608941; doi:10.3390/microorganisms11102612)
Supplement: Supplementary file 1 [file microorganisms-11-02612-s001.zip › Table_S6_Initial_ phylogeny_MAGs.xlsx]

## Sheet: all MAGs
Category	Number of MAGs	Taxonomic classification within category	Number of MAGs	% of MAGs per category
Lichens + mosses	27	unclassified	2	7.40741
		other	2	7.40741
		p__Firmicutes	0	0
		p__Cyanobacteria	5	18.5185
		p__Armatimonadota	1	3.7037
		p__Spirochaetota	0	0
		p__Verrucomicrobiota	0	0
		p__Firmicutes_A	0	0
		p__Desulfobacterota	0	0
		p__Acidobacteriota	3	11.1111
		p__Planctomycetota	0	0
		p__Actinobacteriota	2	7.40741
		p__Patescibacteria	0	0
		p__Bacteroidota	0	0
		p__Proteobacteria	6	22.2222
		p__Chloroflexota	2	7.40741
		d__Archaea	4	14.8148
Oral	849	unclassified	1	0.117786
		other	84	9.89399
		p__Firmicutes	35	4.1225
		p__Cyanobacteria	0	0
		p__Armatimonadota	0	0
		p__Spirochaetota	7	0.824499
		p__Verrucomicrobiota	0	0
		p__Firmicutes_A	170	20.0236
		p__Desulfobacterota	26	3.06243
		p__Acidobacteriota	17	2.00236
		p__Planctomycetota	0	0
		p__Actinobacteriota	159	18.7279
		p__Patescibacteria	109	12.8386
		p__Bacteroidota	81	9.54064
		p__Proteobacteria	115	13.5453
		p__Chloroflexota	32	3.76914
		d__Archaea	14	1.649
Soil	1209	unclassified	0	0
		other	169	13.9785
		p__Firmicutes	13	1.07527
		p__Cyanobacteria	3	0.248139
		p__Armatimonadota	4	0.330852
		p__Spirochaetota	2	0.165426
		p__Verrucomicrobiota	61	5.04549
		p__Firmicutes_A	9	0.744417
		p__Desulfobacterota	5	0.413565
		p__Acidobacteriota	192	15.8809
		p__Planctomycetota	13	1.07527
		p__Actinobacteriota	185	15.3019
		p__Patescibacteria	12	0.992556
		p__Bacteroidota	41	3.39123
		p__Proteobacteria	275	22.7461
		p__Chloroflexota	204	16.8734
		d__Archaea	21	1.73697
High salt	1604	unclassified	2	0.124688
		other	336	20.9476
		p__Firmicutes	0	0
		p__Cyanobacteria	0	0
		p__Armatimonadota	0	0
		p__Spirochaetota	45	2.80549
		p__Verrucomicrobiota	0	0
		p__Firmicutes_A	0	0
		p__Desulfobacterota	124	7.73067
		p__Acidobacteriota	24	1.49626
		p__Planctomycetota	179	11.1596
		p__Actinobacteriota	55	3.42893
		p__Patescibacteria	153	9.53865
		p__Bacteroidota	84	5.23691
		p__Proteobacteria	65	4.05237
		p__Chloroflexota	416	25.9352
		d__Archaea	120	7.4813
Corals + sponges	1648	unclassified	1	0.0606796
		other	390	23.665
		p__Firmicutes	0	0
		p__Cyanobacteria	14	0.849515
		p__Armatimonadota	0	0
		p__Spirochaetota	23	1.39563
		p__Verrucomicrobiota	4	0.242718
		p__Firmicutes_A	0	0
		p__Desulfobacterota	0	0
		p__Acidobacteriota	183	11.1044
		p__Planctomycetota	0	0
		p__Actinobacteriota	157	9.5267
		p__Patescibacteria	11	0.667476
		p__Bacteroidota	29	1.75971
		p__Proteobacteria	382	23.1796
		p__Chloroflexota	424	25.7282
		d__Archaea	30	1.82039
Water	1755	unclassified	0	0
		other	326	18.5755
		p__Firmicutes	15	0.854701
		p__Cyanobacteria	8	0.45584
		p__Armatimonadota	4	0.22792
		p__Spirochaetota	24	1.36752
		p__Verrucomicrobiota	68	3.87464
		p__Firmicutes_A	23	1.31054
		p__Desulfobacterota	127	7.23647
		p__Acidobacteriota	49	2.79202
		p__Planctomycetota	62	3.53276
		p__Actinobacteriota	75	4.2735
		p__Patescibacteria	230	13.1054
		p__Bacteroidota	140	7.97721
		p__Proteobacteria	153	8.71795
		p__Chloroflexota	289	16.4672
		d__Archaea	162	9.23077
Marine	1781	unclassified	0	0
		other	423	23.7507
		p__Firmicutes	9	0.505334
		p__Cyanobacteria	2	0.112296
		p__Armatimonadota	15	0.842223
		p__Spirochaetota	27	1.516
		p__Verrucomicrobiota	7	0.393038
		p__Firmicutes_A	6	0.336889
		p__Desulfobacterota	184	10.3313
		p__Acidobacteriota	83	4.6603
		p__Planctomycetota	158	8.87142
		p__Actinobacteriota	56	3.1443
		p__Patescibacteria	79	4.43571
		p__Bacteroidota	52	2.91971
		p__Proteobacteria	77	4.32341
		p__Chloroflexota	351	19.708
		d__Archaea	252	14.1494
Microbial mats	2151	unclassified	1	0.04649
		other	274	12.7383
		p__Firmicutes	15	0.69735
		p__Cyanobacteria	65	3.02185
		p__Armatimonadota	8	0.37192
		p__Spirochaetota	95	4.41655
		p__Verrucomicrobiota	105	4.88145
		p__Firmicutes_A	10	0.4649
		p__Desulfobacterota	77	3.57973
		p__Acidobacteriota	43	1.99907
		p__Planctomycetota	201	9.34449
		p__Actinobacteriota	39	1.81311
		p__Patescibacteria	275	12.7848
		p__Bacteroidota	399	18.5495
		p__Proteobacteria	384	17.8522
		p__Chloroflexota	128	5.95072
		d__Archaea	32	1.48768
Bioreactors	3506	unclassified	1	0.0285225
		other	663	18.9104
		p__Firmicutes	156	4.44952
		p__Cyanobacteria	3	0.0855676
		p__Armatimonadota	42	1.19795
		p__Spirochaetota	86	2.45294
		p__Verrucomicrobiota	54	1.54022
		p__Firmicutes_A	508	14.4894
		p__Desulfobacterota	109	3.10896
		p__Acidobacteriota	62	1.7684
		p__Planctomycetota	109	3.10896
		p__Actinobacteriota	174	4.96292
		p__Patescibacteria	266	7.58699
		p__Bacteroidota	529	15.0884
		p__Proteobacteria	260	7.41586
		p__Chloroflexota	344	9.81175
		d__Archaea	140	3.99315
Hotsprings	8413	unclassified	2	0.0237727
		other	1749	20.7893
		p__Firmicutes	27	0.320932
		p__Cyanobacteria	219	2.60311
		p__Armatimonadota	302	3.58968
		p__Spirochaetota	142	1.68786
		p__Verrucomicrobiota	187	2.22275
		p__Firmicutes_A	73	0.867705
		p__Desulfobacterota	272	3.23309
		p__Acidobacteriota	344	4.08891
		p__Planctomycetota	366	4.35041
		p__Actinobacteriota	204	2.42482
		p__Patescibacteria	700	8.32046
		p__Bacteroidota	787	9.35457
		p__Proteobacteria	1377	16.3675
		p__Chloroflexota	909	10.8047
		d__Archaea	753	8.95043

## Sheet: Chloroflexota MAGs
Category	Number of MAGs	Taxonomic classification within category	Number of MAGs	% of MAGs per category
Lichens + mosses	2	unclassified	0	0
		c__Anaerolineae	0	0
		c__Chloroflexia	0	0
		c__Dehalococcoidia	0	0
		c__Dormibacteria	0	0
		c__DTOL01	0	0
		c__Ellin6529	0	0
		c__FW602-bin22	0	0
		c__Ktedonobacteria	2	100
		c__UBA2235	0	0
		c__UBA6077	0	0
		c__UBA11872	0	0
Oral	32	unclassified	0	0
		c__Anaerolineae	31	96.875
		c__Chloroflexia	0	0
		c__Dehalococcoidia	0	0
		c__Dormibacteria	0	0
		c__DTOL01	0	0
		c__Ellin6529	1	3.125
		c__FW602-bin22	0	0
		c__Ktedonobacteria	0	0
		c__UBA2235	0	0
		c__UBA6077	0	0
		c__UBA11872	0	0
Soil	204	unclassified	3	1.47059
		c__Anaerolineae	64	31.3725
		c__Chloroflexia	15	7.35294
		c__Dehalococcoidia	9	4.41176
		c__Dormibacteria	32	15.6863
		c__DTOL01	1	0.490196
		c__Ellin6529	5	2.45098
		c__FW602-bin22	1	0.490196
		c__Ktedonobacteria	67	32.8431
		c__UBA2235	1	0.490196
		c__UBA6077	6	2.94118
		c__UBA11872	0	0
High salt	416	unclassified	0	0
		c__Anaerolineae	105	25.2404
		c__Chloroflexia	0	0
		c__Dehalococcoidia	305	73.3173
		c__Dormibacteria	0	0
		c__DTOL01	0	0
		c__Ellin6529	6	1.44231
		c__FW602-bin22	0	0
		c__Ktedonobacteria	0	0
		c__UBA2235	0	0
		c__UBA6077	0	0
		c__UBA11872	0	0
Corals + sponges	424	unclassified	0	0
		c__Anaerolineae	112	26.4151
		c__Chloroflexia	0	0
		c__Dehalococcoidia	263	62.0283
		c__Dormibacteria	0	0
		c__DTOL01	0	0
		c__Ellin6529	0	0
		c__FW602-bin22	1	0.235849
		c__Ktedonobacteria	0	0
		c__UBA2235	3	0.707547
		c__UBA6077	0	0
		c__UBA11872	45	10.6132
Water	289	unclassified	0	0
		c__Anaerolineae	91	31.4879
		c__Chloroflexia	12	4.15225
		c__Dehalococcoidia	178	61.5917
		c__Dormibacteria	0	0
		c__DTOL01	0	0
		c__Ellin6529	7	2.42215
		c__FW602-bin22	0	0
		c__Ktedonobacteria	0	0
		c__UBA2235	1	0.346021
		c__UBA6077	0	0
		c__UBA11872	0	0
Marine	351	unclassified	0	0
		c__Anaerolineae	105	29.9145
		c__Chloroflexia	10	2.849
		c__Dehalococcoidia	231	65.812
		c__Dormibacteria	0	0
		c__DTOL01	2	0.569801
		c__Ellin6529	3	0.854701
		c__FW602-bin22	0	0
		c__Ktedonobacteria	0	0
		c__UBA2235	0	0
		c__UBA6077	0	0
		c__UBA11872	0	0
Microbial mats	128	unclassified	0	0
		c__Anaerolineae	105	82.0312
		c__Chloroflexia	12	9.375
		c__Dehalococcoidia	7	5.46875
		c__Dormibacteria	0	0
		c__DTOL01	0	0
		c__Ellin6529	4	3.125
		c__FW602-bin22	0	0
		c__Ktedonobacteria	0	0
		c__UBA2235	0	0
		c__UBA6077	0	0
		c__UBA11872	0	0
Bioreactors	344	unclassified	0	0
		c__Anaerolineae	279	81.1047
		c__Chloroflexia	13	3.77907
		c__Dehalococcoidia	46	13.3721
		c__Dormibacteria	0	0
		c__DTOL01	0	0
		c__Ellin6529	1	0.290698
		c__FW602-bin22	1	0.290698
		c__Ktedonobacteria	3	0.872093
		c__UBA2235	0	0
		c__UBA6077	1	0.290698
		c__UBA11872	0	0
Hotsprings	909	unclassified	2	0.220022
		c__Anaerolineae	617	67.8768
		c__Chloroflexia	122	13.4213
		c__Dehalococcoidia	134	14.7415
		c__Dormibacteria	0	0
		c__DTOL01	5	0.550055
		c__Ellin6529	12	1.32013
		c__FW602-bin22	5	0.550055
		c__Ktedonobacteria	3	0.330033
		c__UBA2235	1	0.110011
		c__UBA6077	8	0.880088
		c__UBA11872	0	0

## Sheet: all vs. Chloroflexota
all MAGs				Chloroflexota MAGs
Category	Number of MAGs	% of MAGs		Category	Number of MAGs	% of MAGs
Bioreactors	3506	15.2813		Bioreactors	344	11.1004
Corals + sponges	1648	7.18302		Corals + sponges	424	13.6818
High salt	1604	6.99124		High salt	416	13.4237
Hotsprings	8413	36.6691		Hotsprings	909	29.332
Lichens + mosses	27	0.117683		Lichens + mosses	2	0.0645369
Marine	1781	7.76272		Marine	351	11.3262
Microbial mats	2151	9.37541		Microbial mats	128	4.13036
Oral	849	3.70048		Oral	32	1.03259
Soil	1209	5.26958		Soil	204	6.58277
Water	1755	7.64939		Water	289	9.32559
Total	22943	100			3099	100
