# Supplementary material for: Taxonomic Re-Classification and Expansion of the Phylum Chloroflexota Based on over 5000 Genomes and Metagenome-Assembled Genomes
Source: Microorganisms. 2023 Oct 23;11(10):2612. doi: 10.3390/microorganisms11102612 (PMC10608941; doi:10.3390/microorganisms11102612)
Supplement: Supplementary file 1 [file microorganisms-11-02612-s001.zip › Table_S7_Quality_after_MDMcleaner.xlsx]

## Sheet: Chloroflexota MAGs from SRA
MAG	quality standard	source	GTDB-Tk taxonomy after MDMcleaner	number of contigs	length (bp)	MAGpurify - % cont bp	CheckM - contamination	Checkm - strain heterogeneity	Checkm - adjusted contamination	CheckM - completeness	MDMcleaner - completeness	Weighted completeness
B32_89	<50% completeness AND/OR >10% contamination	soil	d__Bacteria;p__Chloroflexota;c__Anaerolineae;o__;f__;g__;s__	677	1318740	0	1.88	0	1.88	22.57	30	24.056
H109_36	<50% completeness AND/OR >10% contamination	hotsprings	d__Bacteria;p__Chloroflexota;c__Anaerolineae;o__;f__;g__;s__	562	1340850	1.22534	0.34	0	0.34	48.64	20	42.912
M43_105	<50% completeness AND/OR >10% contamination	marine	d__Bacteria;p__Chloroflexota;c__Anaerolineae;o__;f__;g__;s__	1562	2975600	0	2.01	0	2.01	13.48	30	16.784
M43_120	<50% completeness AND/OR >10% contamination	marine	d__Bacteria;p__Chloroflexota;c__Anaerolineae;o__;f__;g__;s__	511	1331540	0	3.45	50	1.725	29.5	30	29.6
M62_285	<50% completeness AND/OR >10% contamination	marine	d__Bacteria;p__Chloroflexota;c__Anaerolineae;o__;f__;g__;s__	528	1149030	1.68664	1.72	0	1.72	22.18	10	19.744
N5_243	<50% completeness AND/OR >10% contamination	high salt	d__Bacteria;p__Chloroflexota;c__Anaerolineae;o__;f__;g__;s__	648	1494100	0	0	0	0	28.37	15	25.696
H15_154	<50% completeness AND/OR >10% contamination	hotsprings	d__Bacteria;p__Chloroflexota;c__Anaerolineae;o__4572-78;f__J111;g__;s__	1831	4638850	0	2.59	50	1.295	49.8	40	47.84
M54_200	<50% completeness AND/OR >10% contamination	marine	d__Bacteria;p__Chloroflexota;c__Anaerolineae;o__4572-78;f__NAK82;g__;s__	1068	2670310	0	6.03	0	6.03	26.32	15	24.056
N8_353	<50% completeness AND/OR >10% contamination	high salt	d__Bacteria;p__Chloroflexota;c__Anaerolineae;o__4572-78;f__NAK82;g__;s__	731	1514600	0.35785	0	0	0	19.98	30	21.984
H113_108	<50% completeness AND/OR >10% contamination	hotsprings	d__Bacteria;p__Chloroflexota;c__Anaerolineae;o__4572-78;f__NAK82;g__NAK82;s__	691	1658930	0	0.63	0	0.63	44.18	25	40.344
H29_402	<50% completeness AND/OR >10% contamination	hotsprings	d__Bacteria;p__Chloroflexota;c__Anaerolineae;o__4572-78;f__NAK82;g__NAK82;s__	588	1365450	0	0	0	0	47.1	25	42.68
H23_322	<50% completeness AND/OR >10% contamination	hotsprings	d__Bacteria;p__Chloroflexota;c__Anaerolineae;o__Anaerolineales;f__;g__;s__	430	1412980	1.45437	1.72	0	1.72	56.14	20	48.912
N4_189	<50% completeness AND/OR >10% contamination	high salt	d__Bacteria;p__Chloroflexota;c__Anaerolineae;o__Anaerolineales;f__;g__;s__	753	1553200	0	5	0	5	28.62	10	24.896
B23_45	<50% completeness AND/OR >10% contamination	soil	d__Bacteria;p__Chloroflexota;c__Anaerolineae;o__Anaerolineales;f__Anaerolineaceae;g__;s__	506	1098430	0	0	0	0	26.82	25	26.456
B85_165	<50% completeness AND/OR >10% contamination	soil	d__Bacteria;p__Chloroflexota;c__Anaerolineae;o__Anaerolineales;f__Anaerolineaceae;g__;s__	417	816120	0.45459	3.1	16.67	2.58323	28.5	10	24.8
B85_169	<50% completeness AND/OR >10% contamination	soil	d__Bacteria;p__Chloroflexota;c__Anaerolineae;o__Anaerolineales;f__Anaerolineaceae;g__;s__	206	576460	1.50227	15.52	70.59	4.56443	35.66	35	35.528
F6_109	<50% completeness AND/OR >10% contamination	microbial mats	d__Bacteria;p__Chloroflexota;c__Anaerolineae;o__Anaerolineales;f__Anaerolineaceae;g__;s__	1019	2009700	0	6.9	0	6.9	18.67	40	22.936
H23_311	<50% completeness AND/OR >10% contamination	hotsprings	d__Bacteria;p__Chloroflexota;c__Anaerolineae;o__Anaerolineales;f__Anaerolineaceae;g__;s__	670	1963060	0.0927124	3.45	0	3.45	33.7	35	33.96
M52_175	<50% completeness AND/OR >10% contamination	marine	d__Bacteria;p__Chloroflexota;c__Anaerolineae;o__Anaerolineales;f__Anaerolineaceae;g__;s__	421	805640	1.33558	4.23	0	4.23	22.74	15	21.192
N12_17	<50% completeness AND/OR >10% contamination	high salt	d__Bacteria;p__Chloroflexota;c__Anaerolineae;o__Anaerolineales;f__Anaerolineaceae;g__;s__	857	1797910	0.681347	7.78	10	7.002	42.95	15	37.36
N5_244	<50% completeness AND/OR >10% contamination	high salt	d__Bacteria;p__Chloroflexota;c__Anaerolineae;o__Anaerolineales;f__Anaerolineaceae;g__;s__	698	1451610	0.528379	6.19	40	3.714	30.33	5	25.264
N6_276	<50% completeness AND/OR >10% contamination	high salt	d__Bacteria;p__Chloroflexota;c__Anaerolineae;o__Anaerolineales;f__Anaerolineaceae;g__;s__	599	1437660	0.670534	0.86	0	0.86	19.36	25	20.488
R118_39	<50% completeness AND/OR >10% contamination	bioreactor	d__Bacteria;p__Chloroflexota;c__Anaerolineae;o__Anaerolineales;f__Anaerolineaceae;g__;s__	306	1.03359e+06	0.621136	2.04	0	2.04	17.34	30	19.872
R125_57	<50% completeness AND/OR >10% contamination	bioreactor	d__Bacteria;p__Chloroflexota;c__Anaerolineae;o__Anaerolineales;f__Anaerolineaceae;g__;s__	247	544330	0.617273	6.82	20	5.456	33.59	10	28.872
R125_63	<50% completeness AND/OR >10% contamination	bioreactor	d__Bacteria;p__Chloroflexota;c__Anaerolineae;o__Anaerolineales;f__Anaerolineaceae;g__;s__	483	1141200	0	10.97	15.79	9.23784	40.91	20	36.728
R24_86	<50% completeness AND/OR >10% contamination	bioreactor	d__Bacteria;p__Chloroflexota;c__Anaerolineae;o__Anaerolineales;f__Anaerolineaceae;g__;s__	1079	2572160	0.191279	2.19	0	2.19	15.99	35	19.792
R24_95	<50% completeness AND/OR >10% contamination	bioreactor	d__Bacteria;p__Chloroflexota;c__Anaerolineae;o__Anaerolineales;f__Anaerolineaceae;g__;s__	808	1659330	0.734634	2.59	0	2.59	27.19	10	23.752
R44_131	<50% completeness AND/OR >10% contamination	bioreactor	d__Bacteria;p__Chloroflexota;c__Anaerolineae;o__Anaerolineales;f__Anaerolineaceae;g__;s__	960	2339730	1.24587	13.59	5.88	12.7909	40.18	50	42.144
R69_159	<50% completeness AND/OR >10% contamination	bioreactor	d__Bacteria;p__Chloroflexota;c__Anaerolineae;o__Anaerolineales;f__Anaerolineaceae;g__;s__	902	2059900	0.510219	6.11	0	6.11	50.2	35	47.16
R69_165	<50% completeness AND/OR >10% contamination	bioreactor	d__Bacteria;p__Chloroflexota;c__Anaerolineae;o__Anaerolineales;f__Anaerolineaceae;g__;s__	329	755760	0.821689	0	0	0	28.24	10	24.592
R69_167	<50% completeness AND/OR >10% contamination	bioreactor	d__Bacteria;p__Chloroflexota;c__Anaerolineae;o__Anaerolineales;f__Anaerolineaceae;g__;s__	660	2217740	0.709281	15.06	27.27	10.9531	64.73	30	57.784
R69_168	<50% completeness AND/OR >10% contamination	bioreactor	d__Bacteria;p__Chloroflexota;c__Anaerolineae;o__Anaerolineales;f__Anaerolineaceae;g__;s__	630	1484010	0.93463	11.05	0	11.05	44.51	45	44.608
R830_239	<50% completeness AND/OR >10% contamination	bioreactor	d__Bacteria;p__Chloroflexota;c__Anaerolineae;o__Anaerolineales;f__Anaerolineaceae;g__;s__	500	1227250	0.903646	0	0	0	50.24	30	46.192
R830_241	<50% completeness AND/OR >10% contamination	bioreactor	d__Bacteria;p__Chloroflexota;c__Anaerolineae;o__Anaerolineales;f__Anaerolineaceae;g__;s__	1290	2990630	0.222696	5.17	0	5.17	25.14	40	28.112
R830_258	<50% completeness AND/OR >10% contamination	bioreactor	d__Bacteria;p__Chloroflexota;c__Anaerolineae;o__Anaerolineales;f__Anaerolineaceae;g__;s__	347	885170	0.999808	3.61	33.33	2.40679	25.94	35	27.752
R830_259	<50% completeness AND/OR >10% contamination	bioreactor	d__Bacteria;p__Chloroflexota;c__Anaerolineae;o__Anaerolineales;f__Anaerolineaceae;g__;s__	767	1829470	0.48648	9.98	0	9.98	42.68	15	37.144
R95_320	<50% completeness AND/OR >10% contamination	bioreactor	d__Bacteria;p__Chloroflexota;c__Anaerolineae;o__Anaerolineales;f__Anaerolineaceae;g__;s__	567	1531110	0.263208	9.09	33.33	6.0603	26.49	15	24.192
R95_322	<50% completeness AND/OR >10% contamination	bioreactor	d__Bacteria;p__Chloroflexota;c__Anaerolineae;o__Anaerolineales;f__Anaerolineaceae;g__;s__	390	1987110	0.323586	0.16	100	0	47.96	40	46.368
R95_328	<50% completeness AND/OR >10% contamination	bioreactor	d__Bacteria;p__Chloroflexota;c__Anaerolineae;o__Anaerolineales;f__Anaerolineaceae;g__;s__	747	1815200	0.264434	6.9	50	3.45	40.28	25	37.224
R95_333	<50% completeness AND/OR >10% contamination	bioreactor	d__Bacteria;p__Chloroflexota;c__Anaerolineae;o__Anaerolineales;f__Anaerolineaceae;g__;s__	550	1303110	0.447391	3.45	0	3.45	34.14	15	30.312
B85_166	<50% completeness AND/OR >10% contamination	soil	d__Bacteria;p__Chloroflexota;c__Anaerolineae;o__Anaerolineales;f__Anaerolineaceae;g__49-20;s__	172	343620	0.593679	0.63	75	0.1575	31.03	15	27.824
M52_187	<50% completeness AND/OR >10% contamination	marine	d__Bacteria;p__Chloroflexota;c__Anaerolineae;o__Anaerolineales;f__Anaerolineaceae;g__49-20;s__	621	1424420	0.794709	3.45	50	1.725	21.71	45	26.368
R118_40	<50% completeness AND/OR >10% contamination	bioreactor	d__Bacteria;p__Chloroflexota;c__Anaerolineae;o__Anaerolineales;f__Anaerolineaceae;g__49-20;s__	584	1507050	0.437278	8.62	83.33	1.43695	32.76	45	35.208
R118_45	<50% completeness AND/OR >10% contamination	bioreactor	d__Bacteria;p__Chloroflexota;c__Anaerolineae;o__Anaerolineales;f__Anaerolineaceae;g__49-20;s__	769	1723450	0.693377	16.38	85.71	2.3407	25	50	30
R44_141	<50% completeness AND/OR >10% contamination	bioreactor	d__Bacteria;p__Chloroflexota;c__Anaerolineae;o__Anaerolineales;f__Anaerolineaceae;g__49-20;s__	317	780450	0.568903	4.14	0	4.14	54.94	25	48.952
R826_225	<50% completeness AND/OR >10% contamination	bioreactor	d__Bacteria;p__Chloroflexota;c__Anaerolineae;o__Anaerolineales;f__Anaerolineaceae;g__49-20;s__	375	977540	0.327352	3.45	100	0	33.54	40	34.832
R89_287	<50% completeness AND/OR >10% contamination	bioreactor	d__Bacteria;p__Chloroflexota;c__Anaerolineae;o__Anaerolineales;f__Anaerolineaceae;g__49-20;s__	591	1570350	0	12.07	72.73	3.29149	31.27	40	33.016
R73_200	<50% completeness AND/OR >10% contamination	bioreactor	d__Bacteria;p__Chloroflexota;c__Anaerolineae;o__Anaerolineales;f__Anaerolineaceae;g__49-20;s__49-20 sp002436085	259	657360	3.79701	0	0	0	45.06	30	42.048
R826_220	<50% completeness AND/OR >10% contamination	bioreactor	d__Bacteria;p__Chloroflexota;c__Anaerolineae;o__Anaerolineales;f__Anaerolineaceae;g__49-20;s__49-20 sp002436085	293	664460	0.313036	1.88	0	1.88	25.23	20	24.184
R89_286	<50% completeness AND/OR >10% contamination	bioreactor	d__Bacteria;p__Chloroflexota;c__Anaerolineae;o__Anaerolineales;f__Anaerolineaceae;g__49-20;s__49-20 sp012797215	417	1313800	0.245852	1.72	100	0	38.71	45	39.968
H33_427	<50% completeness AND/OR >10% contamination	hotsprings	d__Bacteria;p__Chloroflexota;c__Anaerolineae;o__Anaerolineales;f__Anaerolineaceae;g__Anaerolinea;s__	473	1550740	0.470098	1.72	100	0	49.37	15	42.496
H55_535	<50% completeness AND/OR >10% contamination	hotsprings	d__Bacteria;p__Chloroflexota;c__Anaerolineae;o__Anaerolineales;f__Anaerolineaceae;g__Anaerolinea;s__	537	1440580	0.159658	0	0	0	45.36	15	39.288
H6_577	<50% completeness AND/OR >10% contamination	hotsprings	d__Bacteria;p__Chloroflexota;c__Anaerolineae;o__Anaerolineales;f__Anaerolineaceae;g__Anaerolinea;s__	480	1575840	0.684714	2.9	25	2.175	42.07	25	38.656
H66_672	<50% completeness AND/OR >10% contamination	hotsprings	d__Bacteria;p__Chloroflexota;c__Anaerolineae;o__Anaerolineales;f__Anaerolineaceae;g__Anaerolinea;s__	882	2079500	0.457802	0	0	0	44.04	35	42.232
H89_892	<50% completeness AND/OR >10% contamination	hotsprings	d__Bacteria;p__Chloroflexota;c__Anaerolineae;o__Anaerolineales;f__Anaerolineaceae;g__Anaerolinea;s__	341	911520	0	0	0	0	34.76	15	30.808
R95_323	<50% completeness AND/OR >10% contamination	bioreactor	d__Bacteria;p__Chloroflexota;c__Anaerolineae;o__Anaerolineales;f__Anaerolineaceae;g__Anaerolinea;s__	606	1796270	0.229364	12.23	10	11.007	43.57	35	41.856
W100_5	<50% completeness AND/OR >10% contamination	water	d__Bacteria;p__Chloroflexota;c__Anaerolineae;o__Anaerolineales;f__Anaerolineaceae;g__Anaerolinea;s__	1127	2668540	0.382981	0	0	0	48.89	15	42.112
H71_745	<50% completeness AND/OR >10% contamination	hotsprings	d__Bacteria;p__Chloroflexota;c__Anaerolineae;o__Anaerolineales;f__Anaerolineaceae;g__Anaerolinea;s__Anaerolinea thermophila	756	2255210	0.446078	2.54	80	0.508	54.62	30	49.696
B23_50	<50% completeness AND/OR >10% contamination	soil	d__Bacteria;p__Chloroflexota;c__Anaerolineae;o__Anaerolineales;f__Anaerolineaceae;g__Bellilinea;s__	656	1665180	0.792107	14.42	0	14.42	63.68	20	54.944
B85_170	<50% completeness AND/OR >10% contamination	soil	d__Bacteria;p__Chloroflexota;c__Anaerolineae;o__Anaerolineales;f__Anaerolineaceae;g__Bellilinea;s__	487	1421150	0.301868	11	63.64	3.9996	39.97	30	37.976
B85_171	<50% completeness AND/OR >10% contamination	soil	d__Bacteria;p__Chloroflexota;c__Anaerolineae;o__Anaerolineales;f__Anaerolineaceae;g__Bellilinea;s__	657	1581090	0.743791	5.64	100	0	25.86	15	23.688
H12_128	<50% completeness AND/OR >10% contamination	hotsprings	d__Bacteria;p__Chloroflexota;c__Anaerolineae;o__Anaerolineales;f__Anaerolineaceae;g__Bellilinea;s__	582	1384140	0	1.72	100	0	26.93	20	25.544
H71_749	<50% completeness AND/OR >10% contamination	hotsprings	d__Bacteria;p__Chloroflexota;c__Anaerolineae;o__Anaerolineales;f__Anaerolineaceae;g__Bellilinea;s__	461	1290740	0.580287	2.04	100	0	45.92	30	42.736
H82_841	<50% completeness AND/OR >10% contamination	hotsprings	d__Bacteria;p__Chloroflexota;c__Anaerolineae;o__Anaerolineales;f__Anaerolineaceae;g__Bellilinea;s__	572	3089130	0.270626	17.24	6.67	16.0901	41.38	55	44.104
R115_25	<50% completeness AND/OR >10% contamination	bioreactor	d__Bacteria;p__Chloroflexota;c__Anaerolineae;o__Anaerolineales;f__Anaerolineaceae;g__Bellilinea;s__	409	1056040	0.461157	0	0	0	25.86	5	21.688
R95_316	<50% completeness AND/OR >10% contamination	bioreactor	d__Bacteria;p__Chloroflexota;c__Anaerolineae;o__Anaerolineales;f__Anaerolineaceae;g__Bellilinea;s__	797	3911500	0.201713	17.03	15.79	14.341	87.93	65	83.344
W8_253	<50% completeness AND/OR >10% contamination	water	d__Bacteria;p__Chloroflexota;c__Anaerolineae;o__Anaerolineales;f__Anaerolineaceae;g__Bellilinea;s__	542	1052350	0.155842	0	0	0	19.03	20	19.224
F16_35	<50% completeness AND/OR >10% contamination	microbial mats	d__Bacteria;p__Chloroflexota;c__Anaerolineae;o__Anaerolineales;f__Anaerolineaceae;g__Brevefilum;s__	264	945990	0.773793	13.86	30	9.702	39.08	25	36.264
F16_36	<50% completeness AND/OR >10% contamination	microbial mats	d__Bacteria;p__Chloroflexota;c__Anaerolineae;o__Anaerolineales;f__Anaerolineaceae;g__Brevefilum;s__	201	795180	1.57574	2.04	100	0	26.8	30	27.44
F6_112	<50% completeness AND/OR >10% contamination	microbial mats	d__Bacteria;p__Chloroflexota;c__Anaerolineae;o__Anaerolineales;f__Anaerolineaceae;g__Brevefilum;s__	307	936210	0.937824	2.59	0	2.59	37.55	20	34.04
F8_120	<50% completeness AND/OR >10% contamination	microbial mats	d__Bacteria;p__Chloroflexota;c__Anaerolineae;o__Anaerolineales;f__Anaerolineaceae;g__Brevefilum;s__	359	1.02438e+06	0	4.31	100	0	37.98	10	32.384
F8_121	<50% completeness AND/OR >10% contamination	microbial mats	d__Bacteria;p__Chloroflexota;c__Anaerolineae;o__Anaerolineales;f__Anaerolineaceae;g__Brevefilum;s__	297	791620	1.22281	1.72	0	1.72	26.02	5	21.816
H79_786	<50% completeness AND/OR >10% contamination	hotsprings	d__Bacteria;p__Chloroflexota;c__Anaerolineae;o__Anaerolineales;f__Anaerolineaceae;g__Brevefilum;s__	408	872250	0	0	0	0	17.79	25	19.232
N11_16	<50% completeness AND/OR >10% contamination	high salt	d__Bacteria;p__Chloroflexota;c__Anaerolineae;o__Anaerolineales;f__Anaerolineaceae;g__Brevefilum;s__	254	578190	0	0.34	100	0	22.73	5	19.184
N12_19	<50% completeness AND/OR >10% contamination	high salt	d__Bacteria;p__Chloroflexota;c__Anaerolineae;o__Anaerolineales;f__Anaerolineaceae;g__Brevefilum;s__	598	1291610	0.341434	6.03	60	2.412	28.68	15	25.944
R48_157	<50% completeness AND/OR >10% contamination	bioreactor	d__Bacteria;p__Chloroflexota;c__Anaerolineae;o__Anaerolineales;f__Anaerolineaceae;g__Brevefilum;s__	375	854920	1.18374	1.72	100	0	55.64	15	47.512
R801_217	<50% completeness AND/OR >10% contamination	bioreactor	d__Bacteria;p__Chloroflexota;c__Anaerolineae;o__Anaerolineales;f__Anaerolineaceae;g__Brevefilum;s__	391	968390	0	0	0	0	47.79	35	45.232
R118_43	<50% completeness AND/OR >10% contamination	bioreactor	d__Bacteria;p__Chloroflexota;c__Anaerolineae;o__Anaerolineales;f__Anaerolineaceae;g__Brevefilum;s__Brevefilum fermentans	10	2494690	53.7357	1.72	0	1.72	92.95	95	93.36
R45_144	<50% completeness AND/OR >10% contamination	bioreactor	d__Bacteria;p__Chloroflexota;c__Anaerolineae;o__Anaerolineales;f__Anaerolineaceae;g__Brevefilum;s__Brevefilum sp012522475	503	1162620	0.698423	6.53	0	6.53	48.04	10	40.432
H82_843	<50% completeness AND/OR >10% contamination	hotsprings	d__Bacteria;p__Chloroflexota;c__Anaerolineae;o__Anaerolineales;f__Anaerolineaceae;g__Ch10;s__	518	1748420	1.29488	8.62	62.5	3.2325	33.39	55	37.712
R125_60	<50% completeness AND/OR >10% contamination	bioreactor	d__Bacteria;p__Chloroflexota;c__Anaerolineae;o__Anaerolineales;f__Anaerolineaceae;g__Ch10;s__	262	578970	0.658065	2.23	50	1.115	24.52	5	20.616
R24_85	<50% completeness AND/OR >10% contamination	bioreactor	d__Bacteria;p__Chloroflexota;c__Anaerolineae;o__Anaerolineales;f__Anaerolineaceae;g__Ch10;s__	789	2313910	0.741602	0.86	0	0.86	37.32	30	35.856
H23_317	<50% completeness AND/OR >10% contamination	hotsprings	d__Bacteria;p__Chloroflexota;c__Anaerolineae;o__Anaerolineales;f__Anaerolineaceae;g__Ch132;s__	502	1468300	0.585711	6.03	33.33	4.0202	51.72	30	47.376
R24_106	<50% completeness AND/OR >10% contamination	bioreactor	d__Bacteria;p__Chloroflexota;c__Anaerolineae;o__Anaerolineales;f__Anaerolineaceae;g__DSYU01;s__	617	1641040	0.711134	0	0	0	46.68	15	40.344
R71_182	<50% completeness AND/OR >10% contamination	bioreactor	d__Bacteria;p__Chloroflexota;c__Anaerolineae;o__Anaerolineales;f__Anaerolineaceae;g__DSYU01;s__	1160	2804560	0.36298	5.8	28.57	4.14294	47.65	15	41.12
R830_257	<50% completeness AND/OR >10% contamination	bioreactor	d__Bacteria;p__Chloroflexota;c__Anaerolineae;o__Anaerolineales;f__Anaerolineaceae;g__DSYU01;s__	398	914850	0	0	0	0	31.91	20	29.528
O13_5	<50% completeness AND/OR >10% contamination	oral	d__Bacteria;p__Chloroflexota;c__Anaerolineae;o__Anaerolineales;f__Anaerolineaceae;g__Flexilinea;s__	557	1287080	0.794045	4.31	0	4.31	44.29	20	39.432
O1E_11	<50% completeness AND/OR >10% contamination	oral	d__Bacteria;p__Chloroflexota;c__Anaerolineae;o__Anaerolineales;f__Anaerolineaceae;g__Flexilinea;s__	379	1.03366e+06	1.61465	1.72	0	1.72	37.1	25	34.68
O2C_19	<50% completeness AND/OR >10% contamination	oral	d__Bacteria;p__Chloroflexota;c__Anaerolineae;o__Anaerolineales;f__Anaerolineaceae;g__Flexilinea;s__	273	714740	0.773708	0	0	0	23.59	25	23.872
O2D_22	<50% completeness AND/OR >10% contamination	oral	d__Bacteria;p__Chloroflexota;c__Anaerolineae;o__Anaerolineales;f__Anaerolineaceae;g__Flexilinea;s__	289	901130	1.14412	0	0	0	33.49	5	27.792
R71_184	<50% completeness AND/OR >10% contamination	bioreactor	d__Bacteria;p__Chloroflexota;c__Anaerolineae;o__Anaerolineales;f__Anaerolineaceae;g__Flexilinea;s__	288	795040	1.02133	0	0	0	25	10	22
R826_233	<50% completeness AND/OR >10% contamination	bioreactor	d__Bacteria;p__Chloroflexota;c__Anaerolineae;o__Anaerolineales;f__Anaerolineaceae;g__Flexilinea;s__	411	1564200	1.27094	2.04	66.67	0.679932	43.18	45	43.544
R94_296	<50% completeness AND/OR >10% contamination	bioreactor	d__Bacteria;p__Chloroflexota;c__Anaerolineae;o__Anaerolineales;f__Anaerolineaceae;g__Flexilinea;s__	218	431560	1.69849	0.16	100	0	32.74	5	27.192
R24_69	<50% completeness AND/OR >10% contamination	bioreactor	d__Bacteria;p__Chloroflexota;c__Anaerolineae;o__Anaerolineales;f__Anaerolineaceae;g__Flexilinea;s__Flexilinea flocculi	458	1080590	0.888404	0.16	0	0.16	35.36	10	30.288
O10_1	<50% completeness AND/OR >10% contamination	oral	d__Bacteria;p__Chloroflexota;c__Anaerolineae;o__Anaerolineales;f__Anaerolineaceae;g__Flexilinea;s__Flexilinea sp001717545	586	1351490	1.08399	5.9	80	1.18	48.34	20	42.672
O12_3	<50% completeness AND/OR >10% contamination	oral	d__Bacteria;p__Chloroflexota;c__Anaerolineae;o__Anaerolineales;f__Anaerolineaceae;g__Flexilinea;s__Flexilinea sp001717545	278	888980	1.41286	1.72	100	0	41.14	25	37.912
O15_8	<50% completeness AND/OR >10% contamination	oral	d__Bacteria;p__Chloroflexota;c__Anaerolineae;o__Anaerolineales;f__Anaerolineaceae;g__Flexilinea;s__Flexilinea sp001717545	527	1321430	0.974702	7.92	85.71	1.13177	42.71	0	34.168
O2B_17	<50% completeness AND/OR >10% contamination	oral	d__Bacteria;p__Chloroflexota;c__Anaerolineae;o__Anaerolineales;f__Anaerolineaceae;g__Flexilinea;s__Flexilinea sp001717545	563	1662330	1.34029	0.16	0	0.16	53.53	20	46.824
O8_31	<50% completeness AND/OR >10% contamination	oral	d__Bacteria;p__Chloroflexota;c__Anaerolineae;o__Anaerolineales;f__Anaerolineaceae;g__Flexilinea;s__Flexilinea sp001717545	376	864790	1.73337	0	0	0	46.6	25	42.28
R103_8	<50% completeness AND/OR >10% contamination	bioreactor	d__Bacteria;p__Chloroflexota;c__Anaerolineae;o__Anaerolineales;f__Anaerolineaceae;g__JAAZNB01;s__JAAZNB01 sp012798515	1155	3104640	0.118854	0	0	0	53.7	35	49.96
H89_888	<50% completeness AND/OR >10% contamination	hotsprings	d__Bacteria;p__Chloroflexota;c__Anaerolineae;o__Anaerolineales;f__Anaerolineaceae;g__JABLXM01;s__	473	1084540	0.13923	0	0	0	9.31	10	9.448
R117_31	<50% completeness AND/OR >10% contamination	bioreactor	d__Bacteria;p__Chloroflexota;c__Anaerolineae;o__Anaerolineales;f__Anaerolineaceae;g__Levilinea;s__	615	1388740	0.172819	0	0	0	39.97	15	34.976
R69_170	<50% completeness AND/OR >10% contamination	bioreactor	d__Bacteria;p__Chloroflexota;c__Anaerolineae;o__Anaerolineales;f__Anaerolineaceae;g__Levilinea;s__	456	1007330	0.431835	0	0	0	31.03	30	30.824
R69_177	<50% completeness AND/OR >10% contamination	bioreactor	d__Bacteria;p__Chloroflexota;c__Anaerolineae;o__Anaerolineales;f__Anaerolineaceae;g__Levilinea;s__	860	2405380	0	3.92	60	1.568	44.91	30	41.928
R77_202	<50% completeness AND/OR >10% contamination	bioreactor	d__Bacteria;p__Chloroflexota;c__Anaerolineae;o__Anaerolineales;f__Anaerolineaceae;g__Levilinea;s__	411	888860	0.168755	3.61	33.33	2.40679	25.08	15	23.064
B24_54	<50% completeness AND/OR >10% contamination	soil	d__Bacteria;p__Chloroflexota;c__Anaerolineae;o__Anaerolineales;f__Anaerolineaceae;g__Longilinea;s__	152	504980	0	0	0	0	27.59	5	23.072
B51_114	<50% completeness AND/OR >10% contamination	soil	d__Bacteria;p__Chloroflexota;c__Anaerolineae;o__Anaerolineales;f__Anaerolineaceae;g__Longilinea;s__	475	1220430	0.389207	8.23	0	8.23	49.6	35	46.68
B52_118	<50% completeness AND/OR >10% contamination	soil	d__Bacteria;p__Chloroflexota;c__Anaerolineae;o__Anaerolineales;f__Anaerolineaceae;g__Longilinea;s__	446	1.03741e+06	0.506068	4.78	42.86	2.73129	41.24	15	35.992
B52_119	<50% completeness AND/OR >10% contamination	soil	d__Bacteria;p__Chloroflexota;c__Anaerolineae;o__Anaerolineales;f__Anaerolineaceae;g__Longilinea;s__	713	2363440	0.613513	7.76	0	7.76	41.6	45	42.28
B85_167	<50% completeness AND/OR >10% contamination	soil	d__Bacteria;p__Chloroflexota;c__Anaerolineae;o__Anaerolineales;f__Anaerolineaceae;g__Longilinea;s__	516	1320620	0.243068	3.61	75	0.9025	30.41	30	30.328
R95_312	<50% completeness AND/OR >10% contamination	bioreactor	d__Bacteria;p__Chloroflexota;c__Anaerolineae;o__Anaerolineales;f__Anaerolineaceae;g__Longilinea;s__	953	2257920	0.194427	5.49	0	5.49	36.21	20	32.968
R95_324	<50% completeness AND/OR >10% contamination	bioreactor	d__Bacteria;p__Chloroflexota;c__Anaerolineae;o__Anaerolineales;f__Anaerolineaceae;g__Longilinea;s__	609	1715330	0.861642	10.5	37.5	6.5625	38	35	37.4
R95_332	<50% completeness AND/OR >10% contamination	bioreactor	d__Bacteria;p__Chloroflexota;c__Anaerolineae;o__Anaerolineales;f__Anaerolineaceae;g__Longilinea;s__	112	1046560	1.28516	0	0	0	30.25	50	34.2
R24_92	<50% completeness AND/OR >10% contamination	bioreactor	d__Bacteria;p__Chloroflexota;c__Anaerolineae;o__Anaerolineales;f__Anaerolineaceae;g__Ornatilinea;s__	882	2262100	0.0835507	3.45	0	3.45	21.32	25	22.056
R77_204	<50% completeness AND/OR >10% contamination	bioreactor	d__Bacteria;p__Chloroflexota;c__Anaerolineae;o__Anaerolineales;f__Anaerolineaceae;g__Pelolinea;s__	513	1142670	0.177654	1.72	0	1.72	25.9	40	28.72
W76_244	<50% completeness AND/OR >10% contamination	water	d__Bacteria;p__Chloroflexota;c__Anaerolineae;o__Anaerolineales;f__Anaerolineaceae;g__Pelolinea;s__	261	566380	1.40542	0.16	100	0	30.1	5	25.08
F6_111	<50% completeness AND/OR >10% contamination	microbial mats	d__Bacteria;p__Chloroflexota;c__Anaerolineae;o__Anaerolineales;f__Anaerolineaceae;g__SpSt-1165;s__	576	1560740	0.511937	1.72	0	1.72	31.72	20	29.376
B23_48	<50% completeness AND/OR >10% contamination	soil	d__Bacteria;p__Chloroflexota;c__Anaerolineae;o__Anaerolineales;f__Anaerolineaceae;g__T78;s__	207	513720	0.842872	1.16	0	1.16	42.32	50	43.856
B67_143	<50% completeness AND/OR >10% contamination	soil	d__Bacteria;p__Chloroflexota;c__Anaerolineae;o__Anaerolineales;f__Anaerolineaceae;g__T78;s__	731	1518210	0.833218	18.21	13.79	15.6988	50.91	40	48.728
B85_163	<50% completeness AND/OR >10% contamination	soil	d__Bacteria;p__Chloroflexota;c__Anaerolineae;o__Anaerolineales;f__Anaerolineaceae;g__T78;s__	747	1565970	0	14.23	25	10.6725	59.61	15	50.688
B85_168	<50% completeness AND/OR >10% contamination	soil	d__Bacteria;p__Chloroflexota;c__Anaerolineae;o__Anaerolineales;f__Anaerolineaceae;g__T78;s__	238	636950	1.49776	6.9	100	0	28.06	25	27.448
M52_184	<50% completeness AND/OR >10% contamination	marine	d__Bacteria;p__Chloroflexota;c__Anaerolineae;o__Anaerolineales;f__Anaerolineaceae;g__T78;s__	484	1388170	1.86216	17.24	53.85	7.95626	31.11	45	33.888
R46_148	<50% completeness AND/OR >10% contamination	bioreactor	d__Bacteria;p__Chloroflexota;c__Anaerolineae;o__Anaerolineales;f__Anaerolineaceae;g__T78;s__	831	2427930	1.37936	17.93	40	10.758	66.16	35	59.928
R46_149	<50% completeness AND/OR >10% contamination	bioreactor	d__Bacteria;p__Chloroflexota;c__Anaerolineae;o__Anaerolineales;f__Anaerolineaceae;g__T78;s__	431	1171170	0.273231	10.63	0	10.63	37.07	15	32.656
R48_158	<50% completeness AND/OR >10% contamination	bioreactor	d__Bacteria;p__Chloroflexota;c__Anaerolineae;o__Anaerolineales;f__Anaerolineaceae;g__T78;s__	270	912460	2.51627	0	0	0	50.24	40	48.192
R77_205	<50% completeness AND/OR >10% contamination	bioreactor	d__Bacteria;p__Chloroflexota;c__Anaerolineae;o__Anaerolineales;f__Anaerolineaceae;g__T78;s__	342	1106250	4.00181	6.9	20	5.52	33.44	40	34.752
R800_214	<50% completeness AND/OR >10% contamination	bioreactor	d__Bacteria;p__Chloroflexota;c__Anaerolineae;o__Anaerolineales;f__Anaerolineaceae;g__T78;s__	366	980130	1.50592	3.45	75	0.8625	52.38	25	46.904
R826_218	<50% completeness AND/OR >10% contamination	bioreactor	d__Bacteria;p__Chloroflexota;c__Anaerolineae;o__Anaerolineales;f__Anaerolineaceae;g__T78;s__	361	1066660	0	7.76	14.29	6.6511	33.78	60	39.024
R826_227	<50% completeness AND/OR >10% contamination	bioreactor	d__Bacteria;p__Chloroflexota;c__Anaerolineae;o__Anaerolineales;f__Anaerolineaceae;g__T78;s__	461	1491120	1.42175	14.94	25	11.205	62.93	65	63.344
R830_238	<50% completeness AND/OR >10% contamination	bioreactor	d__Bacteria;p__Chloroflexota;c__Anaerolineae;o__Anaerolineales;f__Anaerolineaceae;g__T78;s__	767	1971330	0.868956	6.64	28.57	4.74295	50.47	40	48.376
R830_266	<50% completeness AND/OR >10% contamination	bioreactor	d__Bacteria;p__Chloroflexota;c__Anaerolineae;o__Anaerolineales;f__Anaerolineaceae;g__T78;s__	649	2275690	1.94139	13.87	0	13.87	69.01	45	64.208
R830_270	<50% completeness AND/OR >10% contamination	bioreactor	d__Bacteria;p__Chloroflexota;c__Anaerolineae;o__Anaerolineales;f__Anaerolineaceae;g__T78;s__	800	2116670	1.07291	15.44	28.57	11.0288	58.35	35	53.68
R95_315	<50% completeness AND/OR >10% contamination	bioreactor	d__Bacteria;p__Chloroflexota;c__Anaerolineae;o__Anaerolineales;f__Anaerolineaceae;g__T78;s__	321	1007700	0.678773	6.03	100	0	30.33	15	27.264
R43_124	<50% completeness AND/OR >10% contamination	bioreactor	d__Bacteria;p__Chloroflexota;c__Anaerolineae;o__Anaerolineales;f__Anaerolineaceae;g__T78;s__T78 sp002409625	180	499480	1.66773	0	0	0	32.99	15	29.392
R45_143	<50% completeness AND/OR >10% contamination	bioreactor	d__Bacteria;p__Chloroflexota;c__Anaerolineae;o__Anaerolineales;f__Anaerolineaceae;g__T78;s__T78 sp002409625	289	801010	0	0	0	0	50	25	45
R117_32	<50% completeness AND/OR >10% contamination	bioreactor	d__Bacteria;p__Chloroflexota;c__Anaerolineae;o__Anaerolineales;f__Anaerolineaceae;g__T78;s__T78 sp002432795	288	742390	1.60024	2.35	100	0	25.24	20	24.192
R45_146	<50% completeness AND/OR >10% contamination	bioreactor	d__Bacteria;p__Chloroflexota;c__Anaerolineae;o__Anaerolineales;f__Anaerolineaceae;g__T78;s__T78 sp012514645	136	727280	0	2.51	33.33	1.67342	26.65	15	24.32
R45_147	<50% completeness AND/OR >10% contamination	bioreactor	d__Bacteria;p__Chloroflexota;c__Anaerolineae;o__Anaerolineales;f__Anaerolineaceae;g__T78;s__T78 sp012514645	267	1906740	5.97197	16.3	25	12.225	82.21	35	72.768
H13_142	<50% completeness AND/OR >10% contamination	hotsprings	d__Bacteria;p__Chloroflexota;c__Anaerolineae;o__Anaerolineales;f__Anaerolineaceae;g__Thermanaerothrix;s__	482	1017200	0.152379	6.5	22.22	5.0557	14.42	15	14.536
H70_733	<50% completeness AND/OR >10% contamination	hotsprings	d__Bacteria;p__Chloroflexota;c__Anaerolineae;o__Anaerolineales;f__Anaerolineaceae;g__Thermanaerothrix;s__	386	1129120	0.527845	1.72	0	1.72	22.57	20	22.056
R830_236	<50% completeness AND/OR >10% contamination	bioreactor	d__Bacteria;p__Chloroflexota;c__Anaerolineae;o__Anaerolineales;f__Anaerolineaceae;g__UBA4081;s__	614	1244040	0.26848	3.53	12.5	3.08875	37.4	15	32.92
R95_331	<50% completeness AND/OR >10% contamination	bioreactor	d__Bacteria;p__Chloroflexota;c__Anaerolineae;o__Anaerolineales;f__Anaerolineaceae;g__UBA4081;s__	404	1078080	1.22625	7.76	14.29	6.6511	38.43	30	36.744
R47_154	<50% completeness AND/OR >10% contamination	bioreactor	d__Bacteria;p__Chloroflexota;c__Anaerolineae;o__Anaerolineales;f__Anaerolineaceae;g__UBA4781;s__	778	1854350	0.564618	10.52	18.18	8.60746	42.32	55	44.856
R44_134	<50% completeness AND/OR >10% contamination	bioreactor	d__Bacteria;p__Chloroflexota;c__Anaerolineae;o__Anaerolineales;f__Anaerolineaceae;g__UBA4782;s__	560	1339200	0.866189	5.33	50	2.665	44.2	10	37.36
B14_37	<50% completeness AND/OR >10% contamination	soil	d__Bacteria;p__Chloroflexota;c__Anaerolineae;o__Anaerolineales;f__Anaerolineaceae;g__UBA6107;s__	445	1056910	0	0.16	0	0.16	56.55	20	49.24
B23_51	<50% completeness AND/OR >10% contamination	soil	d__Bacteria;p__Chloroflexota;c__Anaerolineae;o__Anaerolineales;f__Anaerolineaceae;g__UBA6107;s__	137	546660	1.67929	0	0	0	29.39	50	33.512
B24_52	<50% completeness AND/OR >10% contamination	soil	d__Bacteria;p__Chloroflexota;c__Anaerolineae;o__Anaerolineales;f__Anaerolineaceae;g__UBA6107;s__	485	1022560	0.684556	5.33	80	1.066	29.56	20	27.648
B24_53	<50% completeness AND/OR >10% contamination	soil	d__Bacteria;p__Chloroflexota;c__Anaerolineae;o__Anaerolineales;f__Anaerolineaceae;g__UBA6107;s__	617	1380220	0.598455	8.93	25	6.6975	52.49	20	45.992
B85_173	<50% completeness AND/OR >10% contamination	soil	d__Bacteria;p__Chloroflexota;c__Anaerolineae;o__Anaerolineales;f__Anaerolineaceae;g__UBA6107;s__	238	510130	1.55843	0	0	0	15.5	15	15.4
R125_53	<50% completeness AND/OR >10% contamination	bioreactor	d__Bacteria;p__Chloroflexota;c__Anaerolineae;o__Anaerolineales;f__Anaerolineaceae;g__UBA6107;s__	460	965430	0.431932	10.03	41.18	5.89965	38.62	0	30.896
R125_58	<50% completeness AND/OR >10% contamination	bioreactor	d__Bacteria;p__Chloroflexota;c__Anaerolineae;o__Anaerolineales;f__Anaerolineaceae;g__UBA6107;s__	279	1192030	0.177848	8.07	28.57	5.7644	34.7	30	33.76
R125_59	<50% completeness AND/OR >10% contamination	bioreactor	d__Bacteria;p__Chloroflexota;c__Anaerolineae;o__Anaerolineales;f__Anaerolineaceae;g__UBA6107;s__	397	946330	0.23142	2.35	50	1.175	26.18	15	23.944
R44_128	<50% completeness AND/OR >10% contamination	bioreactor	d__Bacteria;p__Chloroflexota;c__Anaerolineae;o__Anaerolineales;f__Anaerolineaceae;g__UBA6107;s__	190	1257510	4.4771	17.24	0	17.24	50.16	60	52.128
R44_130	<50% completeness AND/OR >10% contamination	bioreactor	d__Bacteria;p__Chloroflexota;c__Anaerolineae;o__Anaerolineales;f__Anaerolineaceae;g__UBA6107;s__	126	347030	0	1.41	37.5	0.88125	27.13	5	22.704
R44_140	<50% completeness AND/OR >10% contamination	bioreactor	d__Bacteria;p__Chloroflexota;c__Anaerolineae;o__Anaerolineales;f__Anaerolineaceae;g__UBA6107;s__	174	486400	0.314556	1.02	50	0.51	37.3	5	30.84
R46_150	<50% completeness AND/OR >10% contamination	bioreactor	d__Bacteria;p__Chloroflexota;c__Anaerolineae;o__Anaerolineales;f__Anaerolineaceae;g__UBA6107;s__	439	1349090	0.50775	2.66	10	2.394	27.59	10	24.072
R46_153	<50% completeness AND/OR >10% contamination	bioreactor	d__Bacteria;p__Chloroflexota;c__Anaerolineae;o__Anaerolineales;f__Anaerolineaceae;g__UBA6107;s__	189	513710	0.319246	0	0	0	39.91	5	32.928
R47_155	<50% completeness AND/OR >10% contamination	bioreactor	d__Bacteria;p__Chloroflexota;c__Anaerolineae;o__Anaerolineales;f__Anaerolineaceae;g__UBA6107;s__	377	970120	0.86278	1.72	0	1.72	42.74	25	39.192
R830_249	<50% completeness AND/OR >10% contamination	bioreactor	d__Bacteria;p__Chloroflexota;c__Anaerolineae;o__Anaerolineales;f__Anaerolineaceae;g__UBA6107;s__	400	928210	0.643173	0	0	0	25.08	35	27.064
R830_254	<50% completeness AND/OR >10% contamination	bioreactor	d__Bacteria;p__Chloroflexota;c__Anaerolineae;o__Anaerolineales;f__Anaerolineaceae;g__UBA6107;s__	354	1462440	1.90162	8.62	37.5	5.3875	35.97	35	35.776
R830_256	<50% completeness AND/OR >10% contamination	bioreactor	d__Bacteria;p__Chloroflexota;c__Anaerolineae;o__Anaerolineales;f__Anaerolineaceae;g__UBA6107;s__	617	1955720	1.07991	14.58	22.22	11.3403	75.71	45	69.568
R830_263	<50% completeness AND/OR >10% contamination	bioreactor	d__Bacteria;p__Chloroflexota;c__Anaerolineae;o__Anaerolineales;f__Anaerolineaceae;g__UBA6107;s__	456	1191740	0.506822	3.45	0	3.45	27.74	20	26.192
R830_269	<50% completeness AND/OR >10% contamination	bioreactor	d__Bacteria;p__Chloroflexota;c__Anaerolineae;o__Anaerolineales;f__Anaerolineaceae;g__UBA6107;s__	392	1083140	1.63691	3.76	100	0	33.93	35	34.144
R95_306	<50% completeness AND/OR >10% contamination	bioreactor	d__Bacteria;p__Chloroflexota;c__Anaerolineae;o__Anaerolineales;f__Anaerolineaceae;g__UBA6107;s__	987	2701360	1.02948	18.65	34.78	12.1635	52.27	50	51.816
R95_308	<50% completeness AND/OR >10% contamination	bioreactor	d__Bacteria;p__Chloroflexota;c__Anaerolineae;o__Anaerolineales;f__Anaerolineaceae;g__UBA6107;s__	685	1348660	0.123827	1.72	0	1.72	27.19	10	23.752
R95_318	<50% completeness AND/OR >10% contamination	bioreactor	d__Bacteria;p__Chloroflexota;c__Anaerolineae;o__Anaerolineales;f__Anaerolineaceae;g__UBA6107;s__	593	2321490	0.798625	19.83	18.75	16.1119	46.55	60	49.24
R95_327	<50% completeness AND/OR >10% contamination	bioreactor	d__Bacteria;p__Chloroflexota;c__Anaerolineae;o__Anaerolineales;f__Anaerolineaceae;g__UBA6107;s__	1097	3173280	0.529421	10.85	10	9.765	47.66	30	44.128
W55_111	<50% completeness AND/OR >10% contamination	water	d__Bacteria;p__Chloroflexota;c__Anaerolineae;o__Anaerolineales;f__Anaerolineaceae;g__UBA6107;s__	441	970650	0.830371	0	0	0	35.96	15	31.768
W8_254	<50% completeness AND/OR >10% contamination	water	d__Bacteria;p__Chloroflexota;c__Anaerolineae;o__Anaerolineales;f__Anaerolineaceae;g__UBA6107;s__	448	1076470	0.616831	0	0	0	45.52	10	38.416
M11_4	<50% completeness AND/OR >10% contamination	marine	d__Bacteria;p__Chloroflexota;c__Anaerolineae;o__Anaerolineales;f__Anaerolineaceae;g__UBA6107;s__UBA6107 sp012798065	403	903560	1.03037	3.45	100	0	33.23	30	32.584
M11_8	<50% completeness AND/OR >10% contamination	marine	d__Bacteria;p__Chloroflexota;c__Anaerolineae;o__Anaerolineales;f__Anaerolineaceae;g__UBA6107;s__UBA6107 sp012798065	128	390020	1.07174	0	0	0	26.22	10	22.976
M52_190	<50% completeness AND/OR >10% contamination	marine	d__Bacteria;p__Chloroflexota;c__Anaerolineae;o__Anaerolineales;f__Anaerolineaceae;g__UBA6107;s__UBA6107 sp012798065	402	1463700	1.68341	10.5	100	0	47.07	45	46.656
F16_34	<50% completeness AND/OR >10% contamination	microbial mats	d__Bacteria;p__Chloroflexota;c__Anaerolineae;o__Anaerolineales;f__Anaerolineaceae;g__UBA6170;s__	526	1227610	0.127891	7.76	66.67	2.58641	36.32	0	29.056
F6_110	<50% completeness AND/OR >10% contamination	microbial mats	d__Bacteria;p__Chloroflexota;c__Anaerolineae;o__Anaerolineales;f__Anaerolineaceae;g__UBA6170;s__	1224	3119420	0.804637	11.21	42.86	6.40539	46.63	25	42.304
M52_176	<50% completeness AND/OR >10% contamination	marine	d__Bacteria;p__Chloroflexota;c__Anaerolineae;o__Anaerolineales;f__Anaerolineaceae;g__UBA6170;s__	608	1562430	0.149127	1.88	0	1.88	46.81	30	43.448
R95_317	<50% completeness AND/OR >10% contamination	bioreactor	d__Bacteria;p__Chloroflexota;c__Anaerolineae;o__Anaerolineales;f__Anaerolineaceae;g__UBA6170;s__	254	1914750	2.08173	3.45	0	3.45	48.59	50	48.872
H87_870	<50% completeness AND/OR >10% contamination	hotsprings	d__Bacteria;p__Chloroflexota;c__Anaerolineae;o__Anaerolineales;f__DRMV01;g__;s__	418	2466360	0.718062	17.4	37.5	10.875	79.15	50	73.32
H39_475	<50% completeness AND/OR >10% contamination	hotsprings	d__Bacteria;p__Chloroflexota;c__Anaerolineae;o__Anaerolineales;f__E44-bin32;g__;s__	470	1327020	0.977378	0	0	0	37.97	50	40.376
M22_18	<50% completeness AND/OR >10% contamination	marine	d__Bacteria;p__Chloroflexota;c__Anaerolineae;o__Anaerolineales;f__E44-bin32;g__;s__	626	1495940	0	0	0	0	35.63	25	33.504
M43_121	<50% completeness AND/OR >10% contamination	marine	d__Bacteria;p__Chloroflexota;c__Anaerolineae;o__Anaerolineales;f__E44-bin32;g__;s__	863	1935420	0	0.86	0	0.86	13.89	30	17.112
M58_233	<50% completeness AND/OR >10% contamination	marine	d__Bacteria;p__Chloroflexota;c__Anaerolineae;o__Anaerolineales;f__E44-bin32;g__;s__	588	1405570	1.09208	1.72	100	0	32.76	15	29.208
M9_319	<50% completeness AND/OR >10% contamination	marine	d__Bacteria;p__Chloroflexota;c__Anaerolineae;o__Anaerolineales;f__E44-bin32;g__;s__	744	2017950	0.194752	3.76	50	1.88	44.67	50	45.736
M9_324	<50% completeness AND/OR >10% contamination	marine	d__Bacteria;p__Chloroflexota;c__Anaerolineae;o__Anaerolineales;f__E44-bin32;g__;s__	438	952980	0.466956	1.72	0	1.72	24.06	5	20.248
N4_212	<50% completeness AND/OR >10% contamination	high salt	d__Bacteria;p__Chloroflexota;c__Anaerolineae;o__Anaerolineales;f__E44-bin32;g__;s__	777	1864370	0	6.9	0	6.9	41.75	25	38.4
N5_251	<50% completeness AND/OR >10% contamination	high salt	d__Bacteria;p__Chloroflexota;c__Anaerolineae;o__Anaerolineales;f__E44-bin32;g__;s__	585	2348390	0	19.54	36.36	12.4353	45.03	45	45.024
N6_278	<50% completeness AND/OR >10% contamination	high salt	d__Bacteria;p__Chloroflexota;c__Anaerolineae;o__Anaerolineales;f__E44-bin32;g__;s__	754	1627910	0.444742	6.19	0	6.19	33.15	10	28.52
N6_300	<50% completeness AND/OR >10% contamination	high salt	d__Bacteria;p__Chloroflexota;c__Anaerolineae;o__Anaerolineales;f__E44-bin32;g__;s__	563	1347760	0	2.38	25	1.785	39.7	25	36.76
N7_318	<50% completeness AND/OR >10% contamination	high salt	d__Bacteria;p__Chloroflexota;c__Anaerolineae;o__Anaerolineales;f__E44-bin32;g__;s__	418	869260	0	0	0	0	30.06	20	28.048
N8_349	<50% completeness AND/OR >10% contamination	high salt	d__Bacteria;p__Chloroflexota;c__Anaerolineae;o__Anaerolineales;f__E44-bin32;g__;s__	969	2720030	1.19043	15.52	80	3.104	33.28	35	33.624
W60_143	<50% completeness AND/OR >10% contamination	water	d__Bacteria;p__Chloroflexota;c__Anaerolineae;o__Anaerolineales;f__E44-bin32;g__;s__	652	1537150	0	10.5	78.57	2.25015	33.07	5	27.456
W60_185	<50% completeness AND/OR >10% contamination	water	d__Bacteria;p__Chloroflexota;c__Anaerolineae;o__Anaerolineales;f__E44-bin32;g__;s__	543	1723570	0.973561	8.93	69.57	2.7174	45.92	55	47.736
W92_255	<50% completeness AND/OR >10% contamination	water	d__Bacteria;p__Chloroflexota;c__Anaerolineae;o__Anaerolineales;f__E44-bin32;g__;s__	653	1360540	0.248431	0	0	0	19.59	20	19.672
N8_347	<50% completeness AND/OR >10% contamination	high salt	d__Bacteria;p__Chloroflexota;c__Anaerolineae;o__Anaerolineales;f__E44-bin32;g__DUEZ01;s__	699	1669210	0.436134	0.86	100	0	44.72	30	41.776
W61_190	<50% completeness AND/OR >10% contamination	water	d__Bacteria;p__Chloroflexota;c__Anaerolineae;o__Anaerolineales;f__E44-bin32;g__DUEZ01;s__	297	2040540	0.870358	0	0	0	24.36	85	36.488
W61_199	<50% completeness AND/OR >10% contamination	water	d__Bacteria;p__Chloroflexota;c__Anaerolineae;o__Anaerolineales;f__E44-bin32;g__DUEZ01;s__	445	1083130	0	0.86	100	0	42.1	20	37.68
W7_224	<50% completeness AND/OR >10% contamination	water	d__Bacteria;p__Chloroflexota;c__Anaerolineae;o__Anaerolineales;f__E44-bin32;g__DUEZ01;s__	897	2129590	0.47427	0.94	83.33	0.156698	53.39	30	48.712
M43_108	<50% completeness AND/OR >10% contamination	marine	d__Bacteria;p__Chloroflexota;c__Anaerolineae;o__Anaerolineales;f__E44-bin32;g__DUEZ01;s__DUEZ01 sp011174845	1297	2705680	0	11.13	15.91	9.35922	45.03	30	42.024
M9_317	<50% completeness AND/OR >10% contamination	marine	d__Bacteria;p__Chloroflexota;c__Anaerolineae;o__Anaerolineales;f__E44-bin32;g__E44-bin32;s__	343	901140	0	0.86	100	0	27.23	25	26.784
B23_47	<50% completeness AND/OR >10% contamination	soil	d__Bacteria;p__Chloroflexota;c__Anaerolineae;o__Anaerolineales;f__EnvOPS12;g__;s__	551	1246120	0	0	0	0	47.54	10	40.032
H12_127	<50% completeness AND/OR >10% contamination	hotsprings	d__Bacteria;p__Chloroflexota;c__Anaerolineae;o__Anaerolineales;f__EnvOPS12;g__;s__	672	1409670	0.245448	2.59	0	2.59	30.96	10	26.768
H57_538	<50% completeness AND/OR >10% contamination	hotsprings	d__Bacteria;p__Chloroflexota;c__Anaerolineae;o__Anaerolineales;f__EnvOPS12;g__;s__	488	1181250	0	0.31	100	0	38.92	10	33.136
H60_583	<50% completeness AND/OR >10% contamination	hotsprings	d__Bacteria;p__Chloroflexota;c__Anaerolineae;o__Anaerolineales;f__EnvOPS12;g__;s__	396	802100	0.710635	0	0	0	26.03	15	23.824
H81_808	<50% completeness AND/OR >10% contamination	hotsprings	d__Bacteria;p__Chloroflexota;c__Anaerolineae;o__Anaerolineales;f__EnvOPS12;g__;s__	2046	5750120	0.180518	0.94	14.29	0.805674	20.22	50	26.176
H89_879	<50% completeness AND/OR >10% contamination	hotsprings	d__Bacteria;p__Chloroflexota;c__Anaerolineae;o__Anaerolineales;f__EnvOPS12;g__;s__	542	1355980	0	0	0	0	44.09	35	42.272
H89_883	<50% completeness AND/OR >10% contamination	hotsprings	d__Bacteria;p__Chloroflexota;c__Anaerolineae;o__Anaerolineales;f__EnvOPS12;g__;s__	243	510890	0.416919	0	0	0	28.06	0	22.448
N14_45	<50% completeness AND/OR >10% contamination	high salt	d__Bacteria;p__Chloroflexota;c__Anaerolineae;o__Anaerolineales;f__EnvOPS12;g__;s__	554	1198010	0.273787	0	0	0	41	20	36.8
N5_238	<50% completeness AND/OR >10% contamination	high salt	d__Bacteria;p__Chloroflexota;c__Anaerolineae;o__Anaerolineales;f__EnvOPS12;g__;s__	280	550210	1.16137	1.72	0	1.72	21.22	5	17.976
W52_102	<50% completeness AND/OR >10% contamination	water	d__Bacteria;p__Chloroflexota;c__Anaerolineae;o__Anaerolineales;f__EnvOPS12;g__;s__	603	1932760	0.6038	5.64	0	5.64	36.05	25	33.84
W79_249	<50% completeness AND/OR >10% contamination	water	d__Bacteria;p__Chloroflexota;c__Anaerolineae;o__Anaerolineales;f__EnvOPS12;g__;s__	763	1547630	0	5.33	75	1.3325	36.46	10	31.168
F2_70	<50% completeness AND/OR >10% contamination	microbial mats	d__Bacteria;p__Chloroflexota;c__Anaerolineae;o__Anaerolineales;f__EnvOPS12;g__JAABUE01;s__	595	1302450	0.13513	0	0	0	20.3	15	19.24
H21_286	<50% completeness AND/OR >10% contamination	hotsprings	d__Bacteria;p__Chloroflexota;c__Anaerolineae;o__Anaerolineales;f__EnvOPS12;g__JAABUE01;s__	367	819850	0.670854	0	0	0	27.85	10	24.28
H54_519	<50% completeness AND/OR >10% contamination	hotsprings	d__Bacteria;p__Chloroflexota;c__Anaerolineae;o__Anaerolineales;f__EnvOPS12;g__JAABUE01;s__	348	732300	0.288133	1.72	0	1.72	40.51	25	37.408
H18_191	<50% completeness AND/OR >10% contamination	hotsprings	d__Bacteria;p__Chloroflexota;c__Anaerolineae;o__Anaerolineales;f__EnvOPS12;g__NIOZ-UU36;s__	592	1455900	0.270623	1.72	0	1.72	51.18	45	49.944
F10_2	<50% completeness AND/OR >10% contamination	microbial mats	d__Bacteria;p__Chloroflexota;c__Anaerolineae;o__Anaerolineales;f__EnvOPS12;g__OLB14;s__	334	1268900	0	3.45	100	0	27.59	30	28.072
F4_101	<50% completeness AND/OR >10% contamination	microbial mats	d__Bacteria;p__Chloroflexota;c__Anaerolineae;o__Anaerolineales;f__EnvOPS12;g__OLB14;s__	436	1237040	0.555358	0	0	0	24.14	20	23.312
F5_104	<50% completeness AND/OR >10% contamination	microbial mats	d__Bacteria;p__Chloroflexota;c__Anaerolineae;o__Anaerolineales;f__EnvOPS12;g__OLB14;s__	1674	3532450	0.109556	13.24	57.14	5.67466	55.49	25	49.392
F9_124	<50% completeness AND/OR >10% contamination	microbial mats	d__Bacteria;p__Chloroflexota;c__Anaerolineae;o__Anaerolineales;f__EnvOPS12;g__OLB14;s__	819	1938050	0.147571	8.78	16.67	7.31637	42.76	35	41.208
H63_655	<50% completeness AND/OR >10% contamination	hotsprings	d__Bacteria;p__Chloroflexota;c__Anaerolineae;o__Anaerolineales;f__EnvOPS12;g__RBG-16-51-16;s__	620	1325110	0	0.16	100	0	39.45	15	34.56
M48_144	<50% completeness AND/OR >10% contamination	marine	d__Bacteria;p__Chloroflexota;c__Anaerolineae;o__Anaerolineales;f__EnvOPS12;g__UBA12087;s__	279	947530	2.00521	3.76	25	2.82	24.82	10	21.856
M48_152	<50% completeness AND/OR >10% contamination	marine	d__Bacteria;p__Chloroflexota;c__Anaerolineae;o__Anaerolineales;f__EnvOPS12;g__UBA12087;s__	425	1298290	4.09154	9.4	69.23	2.89238	33.31	10	28.648
B30_59	<50% completeness AND/OR >10% contamination	soil	d__Bacteria;p__Chloroflexota;c__Anaerolineae;o__Anaerolineales;f__EnvOPS12;g__UBA12294;s__	1783	3866400	0.118198	12.73	27.27	9.25853	51.9	20	45.52
B30_60	<50% completeness AND/OR >10% contamination	soil	d__Bacteria;p__Chloroflexota;c__Anaerolineae;o__Anaerolineales;f__EnvOPS12;g__UBA12294;s__	990	2300640	0	5.17	66.67	1.72316	44.59	10	37.672
B32_88	<50% completeness AND/OR >10% contamination	soil	d__Bacteria;p__Chloroflexota;c__Anaerolineae;o__Anaerolineales;f__EnvOPS12;g__UBA12294;s__	640	1332990	0.182297	0	0	0	27.1	0	21.68
B77_156	<50% completeness AND/OR >10% contamination	soil	d__Bacteria;p__Chloroflexota;c__Anaerolineae;o__Anaerolineales;f__EnvOPS12;g__UBA12294;s__	596	1208350	0.32772	6.1	38.89	3.72771	27.12	10	23.696
H21_262	<50% completeness AND/OR >10% contamination	hotsprings	d__Bacteria;p__Chloroflexota;c__Anaerolineae;o__Anaerolineales;f__EnvOPS12;g__UBA12294;s__	1371	2720040	0.16213	4.89	25	3.6675	24.93	45	28.944
H39_488	<50% completeness AND/OR >10% contamination	hotsprings	d__Bacteria;p__Chloroflexota;c__Anaerolineae;o__Anaerolineales;f__EnvOPS12;g__UBA12294;s__	750	4033000	0.138606	4.14	50	2.07	46.79	55	48.432
H63_663	<50% completeness AND/OR >10% contamination	hotsprings	d__Bacteria;p__Chloroflexota;c__Anaerolineae;o__Anaerolineales;f__EnvOPS12;g__UBA12294;s__	382	922060	0	0	0	0	40.99	25	37.792
H82_836	<50% completeness AND/OR >10% contamination	hotsprings	d__Bacteria;p__Chloroflexota;c__Anaerolineae;o__Anaerolineales;f__EnvOPS12;g__UBA12294;s__	755	2178140	0.0964125	6.5	10	5.85	32.32	30	31.856
H12_136	<50% completeness AND/OR >10% contamination	hotsprings	d__Bacteria;p__Chloroflexota;c__Anaerolineae;o__Anaerolineales;f__EnvOPS12;g__UBA5195;s__	581	1907530	0.632231	0	0	0	46.05	35	43.84
H82_842	<50% completeness AND/OR >10% contamination	hotsprings	d__Bacteria;p__Chloroflexota;c__Anaerolineae;o__Anaerolineales;f__EnvOPS12;g__UBA5195;s__	298	1292970	0.45322	6.82	90	0.682	25.08	25	25.064
W100_9	<50% completeness AND/OR >10% contamination	water	d__Bacteria;p__Chloroflexota;c__Anaerolineae;o__Anaerolineales;f__EnvOPS12;g__UBA5195;s__	1203	2537230	0.078432	5.49	0	5.49	30.41	10	26.328
H57_542	<50% completeness AND/OR >10% contamination	hotsprings	d__Bacteria;p__Chloroflexota;c__Anaerolineae;o__Anaerolineales;f__EnvOPS12;g__UBA7227;s__	623	1597090	0	2.41	100	0	55.53	20	48.424
W52_105	<50% completeness AND/OR >10% contamination	water	d__Bacteria;p__Chloroflexota;c__Anaerolineae;o__Anaerolineales;f__EnvOPS12;g__UBA7227;s__	528	1148270	0.221202	5.33	20	4.264	35.11	15	31.088
H110_69	<50% completeness AND/OR >10% contamination	hotsprings	d__Bacteria;p__Chloroflexota;c__Anaerolineae;o__Anaerolineales;f__EnvOPS12;g__UBA877;s__	700	1604870	0.135837	3.45	50	1.725	42.16	40	41.728
H13_140	<50% completeness AND/OR >10% contamination	hotsprings	d__Bacteria;p__Chloroflexota;c__Anaerolineae;o__Anaerolineales;f__EnvOPS12;g__UBA8950;s__	562	1248330	0.17223	0	0	0	25.01	15	23.008
H71_741	<50% completeness AND/OR >10% contamination	hotsprings	d__Bacteria;p__Chloroflexota;c__Anaerolineae;o__Anaerolineales;f__EnvOPS12;g__UBA8950;s__	448	961120	0.20705	0	0	0	25.61	10	22.488
N4_199	<50% completeness AND/OR >10% contamination	high salt	d__Bacteria;p__Chloroflexota;c__Anaerolineae;o__Anaerolineales;f__UBA11858;g__;s__	458	1.03913e+06	0.897866	2.07	0	2.07	25.09	10	22.072
H18_192	<50% completeness AND/OR >10% contamination	hotsprings	d__Bacteria;p__Chloroflexota;c__Anaerolineae;o__Anaerolineales;f__UBA11858;g__B10-G9;s__	460	1068660	0.824397	0	0	0	37.02	20	33.616
M48_153	<50% completeness AND/OR >10% contamination	marine	d__Bacteria;p__Chloroflexota;c__Anaerolineae;o__Anaerolineales;f__UBA11858;g__B10-G9;s__	243	787110	1.54997	3.45	100	0	30.25	35	31.2
N4_229	<50% completeness AND/OR >10% contamination	high salt	d__Bacteria;p__Chloroflexota;c__Anaerolineae;o__Anaerolineales;f__UBA11858;g__B10-G9;s__	473	1294090	0	0	0	0	45.75	15	39.6
M22_30	<50% completeness AND/OR >10% contamination	marine	d__Bacteria;p__Chloroflexota;c__Anaerolineae;o__Anaerolineales;f__UBA11858;g__G519;s__	1101	2637110	0.351521	3.45	50	1.725	54.78	30	49.824
N4_181	<50% completeness AND/OR >10% contamination	high salt	d__Bacteria;p__Chloroflexota;c__Anaerolineae;o__Anaerolineales;f__UBA11858;g__G519;s__	509	1102480	0.42994	0	0	0	28.37	0	22.696
N6_277	<50% completeness AND/OR >10% contamination	high salt	d__Bacteria;p__Chloroflexota;c__Anaerolineae;o__Anaerolineales;f__UBA11858;g__G519;s__	754	1819900	0.136271	0.86	0	0.86	18.89	15	18.112
M6_254	<50% completeness AND/OR >10% contamination	marine	d__Bacteria;p__Chloroflexota;c__Anaerolineae;o__Anaerolineales;f__UBA11858;g__NIOZ-UU35;s__	709	1515650	0.219048	1.88	0	1.88	32.6	40	34.08
B14_39	<50% completeness AND/OR >10% contamination	soil	d__Bacteria;p__Chloroflexota;c__Anaerolineae;o__Anaerolineales;f__UBA4823;g__;s__	1042	2289660	0.241084	9.09	11.11	8.0801	27.82	45	31.256
H82_837	<50% completeness AND/OR >10% contamination	hotsprings	d__Bacteria;p__Chloroflexota;c__Anaerolineae;o__Anaerolineales;f__UBA4823;g__;s__	689	2071600	0.595192	3.45	0	3.45	24.22	45	28.376
M9_321	<50% completeness AND/OR >10% contamination	marine	d__Bacteria;p__Chloroflexota;c__Anaerolineae;o__Anaerolineales;f__UBA4823;g__;s__	532	1348770	0.120109	1.72	0	1.72	25.96	10	22.768
N12_25	<50% completeness AND/OR >10% contamination	high salt	d__Bacteria;p__Chloroflexota;c__Anaerolineae;o__Anaerolineales;f__UBA4823;g__;s__	1008	2456390	0.427864	0	0	0	42.07	20	37.656
N5_249	<50% completeness AND/OR >10% contamination	high salt	d__Bacteria;p__Chloroflexota;c__Anaerolineae;o__Anaerolineales;f__UBA4823;g__;s__	820	1843240	0.470367	8.1	0	8.1	35.58	15	31.464
R44_125	<50% completeness AND/OR >10% contamination	bioreactor	d__Bacteria;p__Chloroflexota;c__Anaerolineae;o__Anaerolineales;f__UBA4823;g__;s__	601	1368910	0.343339	1.72	0	1.72	24.76	20	23.808
R46_151	<50% completeness AND/OR >10% contamination	bioreactor	d__Bacteria;p__Chloroflexota;c__Anaerolineae;o__Anaerolineales;f__UBA4823;g__;s__	790	1756490	0.419017	6.5	25	4.875	36.43	25	34.144
R89_280	<50% completeness AND/OR >10% contamination	bioreactor	d__Bacteria;p__Chloroflexota;c__Anaerolineae;o__Anaerolineales;f__UBA4823;g__;s__	347	1298500	0.566038	0	0	0	45.51	35	43.408
W60_144	<50% completeness AND/OR >10% contamination	water	d__Bacteria;p__Chloroflexota;c__Anaerolineae;o__Anaerolineales;f__UBA4823;g__;s__	727	1535210	0.624019	5.17	33.33	3.44684	31.32	25	30.056
W61_198	<50% completeness AND/OR >10% contamination	water	d__Bacteria;p__Chloroflexota;c__Anaerolineae;o__Anaerolineales;f__UBA4823;g__;s__	814	1949690	0.706779	13.73	55.56	6.10161	27.84	20	26.272
N5_255	<50% completeness AND/OR >10% contamination	high salt	d__Bacteria;p__Chloroflexota;c__Anaerolineae;o__Anaerolineales;f__UBA4823;g__9FT-COMBO-55-16;s__	752	1999710	0.579084	0.16	0	0.16	41.35	40	41.08
W60_183	<50% completeness AND/OR >10% contamination	water	d__Bacteria;p__Chloroflexota;c__Anaerolineae;o__Anaerolineales;f__UBA4823;g__9FT-COMBO-55-16;s__	931	2948100	0.723517	17.32	40	10.392	55.17	25	49.136
H21_287	<50% completeness AND/OR >10% contamination	hotsprings	d__Bacteria;p__Chloroflexota;c__Anaerolineae;o__Anaerolineales;f__UBA4823;g__CAIQJJ01;s__	336	762350	0.82508	1.88	0	1.88	29.94	10	25.952
H63_648	<50% completeness AND/OR >10% contamination	hotsprings	d__Bacteria;p__Chloroflexota;c__Anaerolineae;o__Anaerolineales;f__UBA4823;g__DSOS01;s__	426	904270	0.453404	0	0	0	32.92	25	31.336
H6_570	<50% completeness AND/OR >10% contamination	hotsprings	d__Bacteria;p__Chloroflexota;c__Anaerolineae;o__Anaerolineales;f__UBA4823;g__DSWF01;s__	237	552530	0.738421	0	0	0	25	20	24
H21_238	<50% completeness AND/OR >10% contamination	hotsprings	d__Bacteria;p__Chloroflexota;c__Anaerolineae;o__Anaerolineales;f__UBA4823;g__DSWF01;s__DSWF01 sp011368195	674	1777890	0.158615	4.31	33.33	2.87348	37.03	35	36.624
B14_38	<50% completeness AND/OR >10% contamination	soil	d__Bacteria;p__Chloroflexota;c__Anaerolineae;o__Anaerolineales;f__UBA4823;g__FEB-25;s__	617	1995350	1.36517	8.68	57.14	3.72025	46.55	45	46.24
W16_40	<50% completeness AND/OR >10% contamination	water	d__Bacteria;p__Chloroflexota;c__Anaerolineae;o__Anaerolineales;f__UBA4823;g__FEB-25;s__	621	1246880	0.126716	0	0	0	27.05	5	22.64
H79_789	<50% completeness AND/OR >10% contamination	hotsprings	d__Bacteria;p__Chloroflexota;c__Anaerolineae;o__Anaerolineales;f__UBA4823;g__JAAYXE01;s__	707	1868810	0.743789	0.86	0	0.86	43.84	15	38.072
M11_15	<50% completeness AND/OR >10% contamination	marine	d__Bacteria;p__Chloroflexota;c__Anaerolineae;o__Anaerolineales;f__UBA4823;g__JAAZNS01;s__	495	1494100	0.617763	0.16	100	0	52.04	35	48.632
H112_102	<50% completeness AND/OR >10% contamination	hotsprings	d__Bacteria;p__Chloroflexota;c__Anaerolineae;o__Anaerolineales;f__UBA4823;g__NAK19;s__	121	1354950	0	0	0	0	36.21	55	39.968
H21_266	<50% completeness AND/OR >10% contamination	hotsprings	d__Bacteria;p__Chloroflexota;c__Anaerolineae;o__Anaerolineales;f__UBA4823;g__RBG-16-57-11;s__	1041	2052130	0.188097	3.61	25	2.7075	31.27	20	29.016
H89_893	<50% completeness AND/OR >10% contamination	hotsprings	d__Bacteria;p__Chloroflexota;c__Anaerolineae;o__Anaerolineales;f__UBA4823;g__RBG-16-57-11;s__	862	2516410	0.63066	5.33	0	5.33	48.56	20	42.848
R24_100	<50% completeness AND/OR >10% contamination	bioreactor	d__Bacteria;p__Chloroflexota;c__Anaerolineae;o__Anaerolineales;f__UBA4823;g__RBG-16-57-11;s__	901	2313660	0.185853	0	0	0	44.98	10	37.984
H12_120	<50% completeness AND/OR >10% contamination	hotsprings	d__Bacteria;p__Chloroflexota;c__Anaerolineae;o__Anaerolineales;f__UBA4823;g__UBA4823;s__	481	1.02432e+06	0.531084	0	0	0	20.38	30	22.304
H111_80	<50% completeness AND/OR >10% contamination	hotsprings	d__Bacteria;p__Chloroflexota;c__Anaerolineae;o__Anaerolineales;f__UBA6663;g__;s__	625	1658040	0	1.88	33.33	1.2534	56.04	10	46.832
H20_236	<50% completeness AND/OR >10% contamination	hotsprings	d__Bacteria;p__Chloroflexota;c__Anaerolineae;o__Anaerolineales;f__UBA6663;g__;s__	641	1528420	0.48874	1.72	0	1.72	41.53	25	38.224
H80_793	<50% completeness AND/OR >10% contamination	hotsprings	d__Bacteria;p__Chloroflexota;c__Anaerolineae;o__Anaerolineales;f__UBA6663;g__;s__	455	961040	0	0	0	0	27.8	5	23.24
H84_857	<50% completeness AND/OR >10% contamination	hotsprings	d__Bacteria;p__Chloroflexota;c__Anaerolineae;o__Anaerolineales;f__UBA6663;g__;s__	488	1091170	0	0	0	0	38.98	20	35.184
H21_251	<50% completeness AND/OR >10% contamination	hotsprings	d__Bacteria;p__Chloroflexota;c__Anaerolineae;o__Anaerolineales;f__UBA6663;g__SpSt-583;s__	973	2265750	0.251572	2.74	0	2.74	38.4	30	36.72
H105_23	<50% completeness AND/OR >10% contamination	hotsprings	d__Bacteria;p__Chloroflexota;c__Anaerolineae;o__B4-G1;f__;g__;s__	1051	2242110	0	0	0	0	16.85	25	18.48
H33_428	<50% completeness AND/OR >10% contamination	hotsprings	d__Bacteria;p__Chloroflexota;c__Anaerolineae;o__B4-G1;f__;g__;s__	698	1470800	0	0	0	0	14.26	10	13.408
H54_521	<50% completeness AND/OR >10% contamination	hotsprings	d__Bacteria;p__Chloroflexota;c__Anaerolineae;o__B4-G1;f__;g__;s__	412	881180	0	0.63	0	0.63	29.31	15	26.448
H71_737	<50% completeness AND/OR >10% contamination	hotsprings	d__Bacteria;p__Chloroflexota;c__Anaerolineae;o__B4-G1;f__;g__;s__	307	633820	0	1.72	0	1.72	12.85	0	10.28
M58_223	<50% completeness AND/OR >10% contamination	marine	d__Bacteria;p__Chloroflexota;c__Anaerolineae;o__B4-G1;f__;g__;s__	762	1785060	0	5.17	16.67	4.30816	34.8	35	34.84
F14_24	<50% completeness AND/OR >10% contamination	microbial mats	d__Bacteria;p__Chloroflexota;c__Anaerolineae;o__B4-G1;f__B4-G1;g__;s__	1005	5620670	0	12.93	0	12.93	90.36	80	88.288
H23_315	<50% completeness AND/OR >10% contamination	hotsprings	d__Bacteria;p__Chloroflexota;c__Anaerolineae;o__B4-G1;f__B4-G1;g__;s__	711	2106480	1.22859	1.72	0	1.72	50.67	40	48.536
M58_241	<50% completeness AND/OR >10% contamination	marine	d__Bacteria;p__Chloroflexota;c__Anaerolineae;o__B4-G1;f__B4-G1;g__;s__	1975	4606230	0	20.13	22.95	15.5102	49.76	40	47.808
M7_297	<50% completeness AND/OR >10% contamination	marine	d__Bacteria;p__Chloroflexota;c__Anaerolineae;o__B4-G1;f__B4-G1;g__;s__	855	1780350	0.422389	9.58	14.29	8.21102	24.86	30	25.888
M9_323	<50% completeness AND/OR >10% contamination	marine	d__Bacteria;p__Chloroflexota;c__Anaerolineae;o__B4-G1;f__B4-G1;g__;s__	941	2199420	0	10.97	0	10.97	40.2	40	40.16
N14_52	<50% completeness AND/OR >10% contamination	high salt	d__Bacteria;p__Chloroflexota;c__Anaerolineae;o__B4-G1;f__B4-G1;g__;s__	1106	2515800	0.869703	13.79	20	11.032	40.13	15	35.104
N6_290	<50% completeness AND/OR >10% contamination	high salt	d__Bacteria;p__Chloroflexota;c__Anaerolineae;o__B4-G1;f__B4-G1;g__;s__	353	864360	0	0	0	0	27.43	20	25.944
N7_324	<50% completeness AND/OR >10% contamination	high salt	d__Bacteria;p__Chloroflexota;c__Anaerolineae;o__B4-G1;f__B4-G1;g__;s__	785	4087070	0	17.24	8.33	15.8039	73.2	90	76.56
N7_327	<50% completeness AND/OR >10% contamination	high salt	d__Bacteria;p__Chloroflexota;c__Anaerolineae;o__B4-G1;f__B4-G1;g__;s__	449	1510480	0	3.59	16.67	2.99155	33.48	65	39.784
N7_333	<50% completeness AND/OR >10% contamination	high salt	d__Bacteria;p__Chloroflexota;c__Anaerolineae;o__B4-G1;f__B4-G1;g__;s__	239	1002310	0	0	0	0	27.43	30	27.944
N8_374	<50% completeness AND/OR >10% contamination	high salt	d__Bacteria;p__Chloroflexota;c__Anaerolineae;o__B4-G1;f__B4-G1;g__;s__	749	1740440	0	0	0	0	28.84	10	25.072
N9_379	<50% completeness AND/OR >10% contamination	high salt	d__Bacteria;p__Chloroflexota;c__Anaerolineae;o__B4-G1;f__B4-G1;g__;s__	676	1620090	0	0	0	0	48.82	25	44.056
W92_281	<50% completeness AND/OR >10% contamination	water	d__Bacteria;p__Chloroflexota;c__Anaerolineae;o__B4-G1;f__B4-G1;g__;s__	1039	2300240	0.36431	4.78	0	4.78	47.65	15	41.12
M7_300	<50% completeness AND/OR >10% contamination	marine	d__Bacteria;p__Chloroflexota;c__Anaerolineae;o__B4-G1;f__B4-G1;g__B30-G15;s__	531	1482130	0	9.4	41.67	5.48302	47.9	30	44.32
N2_77	<50% completeness AND/OR >10% contamination	high salt	d__Bacteria;p__Chloroflexota;c__Anaerolineae;o__B4-G1;f__B4-G1;g__B30-G15;s__	1171	2768080	0	6.5	25	4.875	44.97	35	42.976
N7_328	<50% completeness AND/OR >10% contamination	high salt	d__Bacteria;p__Chloroflexota;c__Anaerolineae;o__B4-G1;f__B4-G1;g__B30-G15;s__	172	1200290	0	3.45	50	1.725	25.86	40	28.688
F17_47	<50% completeness AND/OR >10% contamination	microbial mats	d__Bacteria;p__Chloroflexota;c__Anaerolineae;o__B4-G1;f__B4-G1;g__JAAZAN01;s__	561	1236300	0	0	0	0	28.16	10	24.528
N11_10	<50% completeness AND/OR >10% contamination	high salt	d__Bacteria;p__Chloroflexota;c__Anaerolineae;o__B4-G1;f__B4-G1;g__JAAZAN01;s__	817	2126970	0	0.31	100	0	49.58	45	48.664
W92_257	<50% completeness AND/OR >10% contamination	water	d__Bacteria;p__Chloroflexota;c__Anaerolineae;o__B4-G1;f__B4-G1;g__JAAZAN01;s__	685	1451090	0	0	0	0	40.22	20	36.176
H111_78	<50% completeness AND/OR >10% contamination	hotsprings	d__Bacteria;p__Chloroflexota;c__Anaerolineae;o__B4-G1;f__DUEL01;g__;s__	489	1238770	0	0	0	0	32.08	20	29.664
H6_576	<50% completeness AND/OR >10% contamination	hotsprings	d__Bacteria;p__Chloroflexota;c__Anaerolineae;o__B4-G1;f__DUEL01;g__;s__	504	1291800	0	0	0	0	39	30	37.2
H81_811	<50% completeness AND/OR >10% contamination	hotsprings	d__Bacteria;p__Chloroflexota;c__Anaerolineae;o__B4-G1;f__DUEL01;g__;s__	549	1577310	1.62238	7.21	0	7.21	40.13	40	40.104
H85_865	<50% completeness AND/OR >10% contamination	hotsprings	d__Bacteria;p__Chloroflexota;c__Anaerolineae;o__B4-G1;f__DUEL01;g__;s__	428	1476150	0	5.33	0	5.33	35.97	35	35.776
H101_10	<50% completeness AND/OR >10% contamination	hotsprings	d__Bacteria;p__Chloroflexota;c__Anaerolineae;o__B4-G1;f__DUEL01;g__SpSt-77;s__	440	1698460	0	15.67	36.36	9.97239	49.69	50	49.752
H101_11	<50% completeness AND/OR >10% contamination	hotsprings	d__Bacteria;p__Chloroflexota;c__Anaerolineae;o__B4-G1;f__DUEL01;g__SpSt-77;s__	164	946770	0	6.66	88.89	0.739926	28.12	50	32.496
H105_25	<50% completeness AND/OR >10% contamination	hotsprings	d__Bacteria;p__Chloroflexota;c__Anaerolineae;o__B4-G1;f__DUEL01;g__SpSt-77;s__	380	1390760	0	5.09	77.78	1.131	44.01	50	45.208
H109_34	<50% completeness AND/OR >10% contamination	hotsprings	d__Bacteria;p__Chloroflexota;c__Anaerolineae;o__B4-G1;f__DUEL01;g__SpSt-77;s__	616	1948730	0	5.83	83.33	0.971861	45.82	45	45.656
H24_324	<50% completeness AND/OR >10% contamination	hotsprings	d__Bacteria;p__Chloroflexota;c__Anaerolineae;o__B4-G1;f__DUEL01;g__SpSt-77;s__	660	1907800	0	5.17	66.67	1.72316	34.78	35	34.824
H73_760	<50% completeness AND/OR >10% contamination	hotsprings	d__Bacteria;p__Chloroflexota;c__Anaerolineae;o__B4-G1;f__DUEL01;g__SpSt-77;s__	612	1442830	0	0	0	0	45.38	25	41.304
H81_810	<50% completeness AND/OR >10% contamination	hotsprings	d__Bacteria;p__Chloroflexota;c__Anaerolineae;o__B4-G1;f__DUEL01;g__SpSt-77;s__	704	2024800	0	7.52	100	0	33.71	35	33.968
F14_22	<50% completeness AND/OR >10% contamination	microbial mats	d__Bacteria;p__Chloroflexota;c__Anaerolineae;o__B4-G1;f__SLSP01;g__;s__	1607	4293340	0	13.24	8.7	12.0881	88.87	65	84.096
F17_37	<50% completeness AND/OR >10% contamination	microbial mats	d__Bacteria;p__Chloroflexota;c__Anaerolineae;o__B4-G1;f__SLSP01;g__;s__	526	1404410	0	0.47	0	0.47	26.02	10	22.816
F7_118	<50% completeness AND/OR >10% contamination	microbial mats	d__Bacteria;p__Chloroflexota;c__Anaerolineae;o__B4-G1;f__SLSP01;g__;s__	648	1593030	0	1.72	0	1.72	42.02	35	40.616
R24_89	<50% completeness AND/OR >10% contamination	bioreactor	d__Bacteria;p__Chloroflexota;c__Anaerolineae;o__B4-G1;f__SLSP01;g__;s__	359	733680	0.310762	0	0	0	32.08	0	25.664
R44_126	<50% completeness AND/OR >10% contamination	bioreactor	d__Bacteria;p__Chloroflexota;c__Anaerolineae;o__B4-G1;f__SLSP01;g__;s__	776	1658200	0	2.66	12.5	2.3275	23.7	15	21.96
R44_132	<50% completeness AND/OR >10% contamination	bioreactor	d__Bacteria;p__Chloroflexota;c__Anaerolineae;o__B4-G1;f__SLSP01;g__;s__	373	849610	0	0	0	0	21.39	30	23.112
R71_186	<50% completeness AND/OR >10% contamination	bioreactor	d__Bacteria;p__Chloroflexota;c__Anaerolineae;o__B4-G1;f__SLSP01;g__;s__	349	835410	0	0	0	0	19.59	10	17.672
B77_160	<50% completeness AND/OR >10% contamination	soil	d__Bacteria;p__Chloroflexota;c__Anaerolineae;o__B4-G1;f__SLSP01;g__DSWT01;s__	826	1931430	0	0	0	0	41.52	30	39.216
H67_687	<50% completeness AND/OR >10% contamination	hotsprings	d__Bacteria;p__Chloroflexota;c__Anaerolineae;o__B4-G1;f__SLSP01;g__DSWT01;s__	492	1837550	0	0	0	0	53.45	25	47.76
H80_799	<50% completeness AND/OR >10% contamination	hotsprings	d__Bacteria;p__Chloroflexota;c__Anaerolineae;o__B4-G1;f__SLSP01;g__DSWT01;s__	169	890520	0	0	0	0	24.92	35	26.936
H82_840	<50% completeness AND/OR >10% contamination	hotsprings	d__Bacteria;p__Chloroflexota;c__Anaerolineae;o__B4-G1;f__SLSP01;g__DSWT01;s__	460	3783960	0	15.52	30	10.864	53.45	55	53.76
R44_136	<50% completeness AND/OR >10% contamination	bioreactor	d__Bacteria;p__Chloroflexota;c__Anaerolineae;o__B4-G1;f__SLSP01;g__DSWT01;s__	514	1164240	0	0.16	0	0.16	36.43	10	31.144
F14_19	<50% completeness AND/OR >10% contamination	microbial mats	d__Bacteria;p__Chloroflexota;c__Anaerolineae;o__B4-G1;f__SLSP01;g__JAAAOZ01;s__	406	1500950	0	0	0	0	30.17	25	29.136
F17_53	<50% completeness AND/OR >10% contamination	microbial mats	d__Bacteria;p__Chloroflexota;c__Anaerolineae;o__B4-G1;f__SLSP01;g__JAAAOZ01;s__	411	1376010	0.162063	1.72	0	1.72	25.86	35	27.688
R94_304	<50% completeness AND/OR >10% contamination	bioreactor	d__Bacteria;p__Chloroflexota;c__Anaerolineae;o__B4-G1;f__SLSP01;g__JAAZNO01;s__	692	1810820	0	0.16	100	0	56.8	15	48.44
R95_311	<50% completeness AND/OR >10% contamination	bioreactor	d__Bacteria;p__Chloroflexota;c__Anaerolineae;o__B4-G1;f__SLSP01;g__JAAZNO01;s__	877	2.08293e+06	0	0.16	0	0.16	40.99	45	41.792
S1_10	<50% completeness AND/OR >10% contamination	corals/sponges	d__Bacteria;p__Chloroflexota;c__Anaerolineae;o__Caldilineales;f__Bin34;g__Bin34;s__	580	1369870	0	0	0	0	46.03	15	39.824
S27_189	<50% completeness AND/OR >10% contamination	corals/sponges	d__Bacteria;p__Chloroflexota;c__Anaerolineae;o__Caldilineales;f__Bin34;g__Bin34;s__	302	751600	0	1.72	100	0	25.49	5	21.392
S27_195	<50% completeness AND/OR >10% contamination	corals/sponges	d__Bacteria;p__Chloroflexota;c__Anaerolineae;o__Caldilineales;f__Bin34;g__Bin34;s__	892	2559500	0	0.34	100	0	49.66	40	47.728
S31_228	<50% completeness AND/OR >10% contamination	corals/sponges	d__Bacteria;p__Chloroflexota;c__Anaerolineae;o__Caldilineales;f__Bin34;g__Bin34;s__	326	737570	0	0	0	0	41.69	10	35.352
S7_337	<50% completeness AND/OR >10% contamination	corals/sponges	d__Bacteria;p__Chloroflexota;c__Anaerolineae;o__Caldilineales;f__Bin34;g__Bin34;s__	776	2020820	0	0.16	100	0	28.46	15	25.768
B89_183	<50% completeness AND/OR >10% contamination	soil	d__Bacteria;p__Chloroflexota;c__Anaerolineae;o__Caldilineales;f__Caldilineaceae;g__;s__	662	1607150	0	0	0	0	36.99	35	36.592
H16_162	<50% completeness AND/OR >10% contamination	hotsprings	d__Bacteria;p__Chloroflexota;c__Anaerolineae;o__Caldilineales;f__Caldilineaceae;g__;s__	524	1088630	0	0	0	0	16.9	15	16.52
M52_188	<50% completeness AND/OR >10% contamination	marine	d__Bacteria;p__Chloroflexota;c__Anaerolineae;o__Caldilineales;f__Caldilineaceae;g__;s__	985	2.05543e+06	0	0.86	0	0.86	33.39	35	33.712
R118_49	<50% completeness AND/OR >10% contamination	bioreactor	d__Bacteria;p__Chloroflexota;c__Anaerolineae;o__Caldilineales;f__Caldilineaceae;g__;s__	1657	4815440	0.118992	0	0	0	37.38	30	35.904
R30_117	<50% completeness AND/OR >10% contamination	bioreactor	d__Bacteria;p__Chloroflexota;c__Anaerolineae;o__Caldilineales;f__Caldilineaceae;g__;s__	682	1453400	0	0.86	100	0	25.24	15	23.192
R830_274	<50% completeness AND/OR >10% contamination	bioreactor	d__Bacteria;p__Chloroflexota;c__Anaerolineae;o__Caldilineales;f__Caldilineaceae;g__;s__	629	1292790	0.455604	3.61	0	3.61	24.75	30	25.8
S1_21	<50% completeness AND/OR >10% contamination	corals/sponges	d__Bacteria;p__Chloroflexota;c__Anaerolineae;o__Caldilineales;f__Caldilineaceae;g__Bin5;s__	613	1847370	0.434131	1.88	100	0	29.94	15	26.952
S1_32	<50% completeness AND/OR >10% contamination	corals/sponges	d__Bacteria;p__Chloroflexota;c__Anaerolineae;o__Caldilineales;f__Caldilineaceae;g__Bin5;s__	813	3188340	1.06701	17.4	13.33	15.0806	63.35	45	59.68
S14_90	<50% completeness AND/OR >10% contamination	corals/sponges	d__Bacteria;p__Chloroflexota;c__Anaerolineae;o__Caldilineales;f__Caldilineaceae;g__Bin5;s__	575	1398890	0.864972	1.72	0	1.72	32.24	5	26.792
S16_101	<50% completeness AND/OR >10% contamination	corals/sponges	d__Bacteria;p__Chloroflexota;c__Anaerolineae;o__Caldilineales;f__Caldilineaceae;g__Bin5;s__	724	2411430	0.704147	1.72	0	1.72	55.45	25	49.36
S16_95	<50% completeness AND/OR >10% contamination	corals/sponges	d__Bacteria;p__Chloroflexota;c__Anaerolineae;o__Caldilineales;f__Caldilineaceae;g__Bin5;s__	1317	3023070	0.339721	3.45	100	0	31.03	20	28.824
S2_119	<50% completeness AND/OR >10% contamination	corals/sponges	d__Bacteria;p__Chloroflexota;c__Anaerolineae;o__Caldilineales;f__Caldilineaceae;g__Bin5;s__	252	2241810	3.33213	0	0	0	48.62	50	48.896
S24_159	<50% completeness AND/OR >10% contamination	corals/sponges	d__Bacteria;p__Chloroflexota;c__Anaerolineae;o__Caldilineales;f__Caldilineaceae;g__Bin5;s__	279	1387340	0	1.88	50	0.94	25.32	10	22.256
S32_230	<50% completeness AND/OR >10% contamination	corals/sponges	d__Bacteria;p__Chloroflexota;c__Anaerolineae;o__Caldilineales;f__Caldilineaceae;g__Bin5;s__	585	3606170	1.56038	9.48	71.43	2.70844	40.52	65	45.416
S32_265	<50% completeness AND/OR >10% contamination	corals/sponges	d__Bacteria;p__Chloroflexota;c__Anaerolineae;o__Caldilineales;f__Caldilineaceae;g__Bin5;s__	752	2309150	0.530931	3.45	100	0	26.36	30	27.088
S7_341	<50% completeness AND/OR >10% contamination	corals/sponges	d__Bacteria;p__Chloroflexota;c__Anaerolineae;o__Caldilineales;f__Caldilineaceae;g__Bin5;s__	423	1091640	1.05163	2.59	0	2.59	33.61	25	31.888
S7_342	<50% completeness AND/OR >10% contamination	corals/sponges	d__Bacteria;p__Chloroflexota;c__Anaerolineae;o__Caldilineales;f__Caldilineaceae;g__Bin5;s__	530	1640570	0.616249	4.23	85.71	0.604467	37.15	25	34.72
S8_364	<50% completeness AND/OR >10% contamination	corals/sponges	d__Bacteria;p__Chloroflexota;c__Anaerolineae;o__Caldilineales;f__Caldilineaceae;g__Bin5;s__	783	1888150	0.365967	3.45	50	1.725	35.14	20	32.112
S8_368	<50% completeness AND/OR >10% contamination	corals/sponges	d__Bacteria;p__Chloroflexota;c__Anaerolineae;o__Caldilineales;f__Caldilineaceae;g__Bin5;s__	1489	4138170	0.235853	2.9	100	0	45.06	25	41.048
S8_383	<50% completeness AND/OR >10% contamination	corals/sponges	d__Bacteria;p__Chloroflexota;c__Anaerolineae;o__Caldilineales;f__Caldilineaceae;g__Bin5;s__	853	2735930	0.333342	12.07	87.5	1.50875	39.97	45	40.976
S32_255	<50% completeness AND/OR >10% contamination	corals/sponges	d__Bacteria;p__Chloroflexota;c__Anaerolineae;o__Caldilineales;f__Caldilineaceae;g__Bin5;s__Bin5 sp009840225	317	1246620	0.746819	6.9	100	0	34.74	15	30.792
B104_1	<50% completeness AND/OR >10% contamination	soil	d__Bacteria;p__Chloroflexota;c__Anaerolineae;o__Caldilineales;f__Caldilineaceae;g__Caldilinea;s__	256	1001420	0.659064	0	0	0	28.17	20	26.536
B51_109	<50% completeness AND/OR >10% contamination	soil	d__Bacteria;p__Chloroflexota;c__Anaerolineae;o__Caldilineales;f__Caldilineaceae;g__Caldilinea;s__	1708	3556820	0.247974	15.99	46.67	8.52747	46.25	20	41
B52_121	<50% completeness AND/OR >10% contamination	soil	d__Bacteria;p__Chloroflexota;c__Anaerolineae;o__Caldilineales;f__Caldilineaceae;g__Caldilinea;s__	681	1794770	0.602306	8.62	16.67	7.18305	29.01	25	28.208
B52_123	<50% completeness AND/OR >10% contamination	soil	d__Bacteria;p__Chloroflexota;c__Anaerolineae;o__Caldilineales;f__Caldilineaceae;g__Caldilinea;s__	816	1929430	0.131645	0	0	0	26.21	5	21.968
H62_638	<50% completeness AND/OR >10% contamination	hotsprings	d__Bacteria;p__Chloroflexota;c__Anaerolineae;o__Caldilineales;f__Caldilineaceae;g__Caldilinea;s__	869	2193820	0.100282	0.16	0	0.16	32.16	25	30.728
H69_725	<50% completeness AND/OR >10% contamination	hotsprings	d__Bacteria;p__Chloroflexota;c__Anaerolineae;o__Caldilineales;f__Caldilineaceae;g__Caldilinea;s__	637	1322980	0.293277	0	0	0	31.03	25	29.824
H71_740	<50% completeness AND/OR >10% contamination	hotsprings	d__Bacteria;p__Chloroflexota;c__Anaerolineae;o__Caldilineales;f__Caldilineaceae;g__Caldilinea;s__	916	2584120	0	1.72	100	0	35.89	30	34.712
H89_889	<50% completeness AND/OR >10% contamination	hotsprings	d__Bacteria;p__Chloroflexota;c__Anaerolineae;o__Caldilineales;f__Caldilineaceae;g__Caldilinea;s__	1144	3364930	0.820522	1.72	0	1.72	57.23	15	48.784
R118_44	<50% completeness AND/OR >10% contamination	bioreactor	d__Bacteria;p__Chloroflexota;c__Anaerolineae;o__Caldilineales;f__Caldilineaceae;g__Caldilinea;s__	394	1043480	0.464791	0.86	0	0.86	17.19	10	15.752
R89_288	<50% completeness AND/OR >10% contamination	bioreactor	d__Bacteria;p__Chloroflexota;c__Anaerolineae;o__Caldilineales;f__Caldilineaceae;g__Caldilinea;s__	1041	2616950	0	0.86	0	0.86	39.85	15	34.88
W58_122	<50% completeness AND/OR >10% contamination	water	d__Bacteria;p__Chloroflexota;c__Anaerolineae;o__Caldilineales;f__Caldilineaceae;g__Caldilinea;s__	962	2345440	0.709888	0	0	0	38.24	30	36.592
H109_40	<50% completeness AND/OR >10% contamination	hotsprings	d__Bacteria;p__Chloroflexota;c__Anaerolineae;o__Caldilineales;f__Caldilineaceae;g__Caldilinea;s__Caldilinea aerophila	1056	2897130	0.0593691	1.88	0	1.88	49.45	35	46.56
H29_406	<50% completeness AND/OR >10% contamination	hotsprings	d__Bacteria;p__Chloroflexota;c__Anaerolineae;o__Caldilineales;f__Caldilineaceae;g__Caldilinea;s__Caldilinea aerophila	637	1662130	0	0	0	0	42.18	25	38.744
H89_885	<50% completeness AND/OR >10% contamination	hotsprings	d__Bacteria;p__Chloroflexota;c__Anaerolineae;o__Caldilineales;f__Caldilineaceae;g__Caldilinea;s__Caldilinea sp003451595	853	3276880	0.775433	1.72	0	1.72	29.65	40	31.72
H89_886	<50% completeness AND/OR >10% contamination	hotsprings	d__Bacteria;p__Chloroflexota;c__Anaerolineae;o__Caldilineales;f__Caldilineaceae;g__Caldilinea;s__Caldilinea sp003451595	472	1147540	0.2257	1.72	100	0	28.71	20	26.968
R69_161	<50% completeness AND/OR >10% contamination	bioreactor	d__Bacteria;p__Chloroflexota;c__Anaerolineae;o__Caldilineales;f__Caldilineaceae;g__Litorilinea;s__	667	1700550	0	0	0	0	22.24	35	24.792
H54_523	<50% completeness AND/OR >10% contamination	hotsprings	d__Bacteria;p__Chloroflexota;c__Anaerolineae;o__Caldilineales;f__J102;g__JAADGC01;s__	526	1359870	0	0.16	0	0.16	34.14	35	34.312
H68_710	<50% completeness AND/OR >10% contamination	hotsprings	d__Bacteria;p__Chloroflexota;c__Anaerolineae;o__CG2-30-64-16;f__CG2-30-64-16;g__;s__	791	1960520	0	2.38	0	2.38	49.76	30	45.808
H82_838	<50% completeness AND/OR >10% contamination	hotsprings	d__Bacteria;p__Chloroflexota;c__Anaerolineae;o__CG2-30-64-16;f__CG2-30-64-16;g__;s__	368	1427510	1.86619	16.27	91.3	1.41549	37.3	40	37.84
H11_61	<50% completeness AND/OR >10% contamination	hotsprings	d__Bacteria;p__Chloroflexota;c__Anaerolineae;o__CG2-30-64-16;f__CG2-30-64-16;g__MWBF01;s__	691	1576500	0	1.72	0	1.72	35.8	15	31.64
H54_520	<50% completeness AND/OR >10% contamination	hotsprings	d__Bacteria;p__Chloroflexota;c__Anaerolineae;o__CG2-30-64-16;f__CG2-30-64-16;g__MWBF01;s__	734	1709730	0	0	0	0	52.59	20	46.072
H71_753	<50% completeness AND/OR >10% contamination	hotsprings	d__Bacteria;p__Chloroflexota;c__Anaerolineae;o__CG2-30-64-16;f__CG2-30-64-16;g__MWBF01;s__	446	1098900	0	0.16	100	0	32.63	25	31.104
H78_779	<50% completeness AND/OR >10% contamination	hotsprings	d__Bacteria;p__Chloroflexota;c__Anaerolineae;o__CG2-30-64-16;f__CG2-30-64-16;g__MWBF01;s__	500	1183610	0.587187	0	0	0	33.54	15	29.832
M52_181	<50% completeness AND/OR >10% contamination	marine	d__Bacteria;p__Chloroflexota;c__Anaerolineae;o__CG2-30-64-16;f__CG2-30-64-16;g__MWBF01;s__	670	1887840	0	0	0	0	53.52	30	48.816
R830_276	<50% completeness AND/OR >10% contamination	bioreactor	d__Bacteria;p__Chloroflexota;c__Anaerolineae;o__CG2-30-64-16;f__CG2-30-64-16;g__MWBF01;s__	453	1248970	0	2.93	33.33	1.95343	42.48	20	37.984
B104_3	<50% completeness AND/OR >10% contamination	soil	d__Bacteria;p__Chloroflexota;c__Anaerolineae;o__CG2-30-64-16;f__SSC4;g__;s__	684	2267770	4.23808	8.93	62.5	3.34875	28.31	30	28.648
B51_113	<50% completeness AND/OR >10% contamination	soil	d__Bacteria;p__Chloroflexota;c__Anaerolineae;o__CG2-30-64-16;f__SSC4;g__;s__	826	2553620	0	6.9	100	0	43.89	50	45.112
R95_334	<50% completeness AND/OR >10% contamination	bioreactor	d__Bacteria;p__Chloroflexota;c__Anaerolineae;o__CG2-30-64-16;f__SSC4;g__;s__	1040	2283210	0.157235	1.72	100	0	25.55	20	24.44
B104_2	<50% completeness AND/OR >10% contamination	soil	d__Bacteria;p__Chloroflexota;c__Anaerolineae;o__CG2-30-64-16;f__SSC4;g__SSC4;s__	414	1105760	0	0.31	100	0	21	10	18.8
R830_251	<50% completeness AND/OR >10% contamination	bioreactor	d__Bacteria;p__Chloroflexota;c__Anaerolineae;o__CG2-30-64-16;f__SSC4;g__SSC4;s__	403	1314320	0	10.32	92.86	0.736848	33.3	25	31.64
M54_205	<50% completeness AND/OR >10% contamination	marine	d__Bacteria;p__Chloroflexota;c__Anaerolineae;o__DRVO01;f__DRVO01;g__;s__	613	1443800	0	0	0	0	41.54	20	37.232
R71_183	<50% completeness AND/OR >10% contamination	bioreactor	d__Bacteria;p__Chloroflexota;c__Anaerolineae;o__DRVO01;f__DRVO01;g__;s__	301	566050	0	0	0	0	18.42	15	17.736
H39_474	<50% completeness AND/OR >10% contamination	hotsprings	d__Bacteria;p__Chloroflexota;c__Anaerolineae;o__DSLN01;f__DSLN01;g__;s__	440	919900	0	0	0	0	20.44	15	19.352
N4_209	<50% completeness AND/OR >10% contamination	high salt	d__Bacteria;p__Chloroflexota;c__Anaerolineae;o__DTPP01;f__DTLA01;g__;s__	713	1867840	0	3.45	0	3.45	29.31	65	36.448
H110_67	<50% completeness AND/OR >10% contamination	hotsprings	d__Bacteria;p__Chloroflexota;c__Anaerolineae;o__DTPP01;f__DTLA01;g__DTLA01;s__	1046	2747800	0	2.41	0	2.41	27.36	70	35.888
H33_439	<50% completeness AND/OR >10% contamination	hotsprings	d__Bacteria;p__Chloroflexota;c__Anaerolineae;o__DTPP01;f__DTPP01;g__DTPP01;s__DTPP01 sp011334325	681	1828470	0	1.88	0	1.88	48.67	35	45.936
H6_560	<50% completeness AND/OR >10% contamination	hotsprings	d__Bacteria;p__Chloroflexota;c__Anaerolineae;o__DTPP01;f__DTPP01;g__DTPP01;s__DTPP01 sp011334325	434	949410	0	0	0	0	34.33	35	34.464
H23_309	<50% completeness AND/OR >10% contamination	hotsprings	d__Bacteria;p__Chloroflexota;c__Anaerolineae;o__DTPP01;f__JACIWP01;g__;s__	295	683900	0	0	0	0	27.05	10	23.64
H27_365	<50% completeness AND/OR >10% contamination	hotsprings	d__Bacteria;p__Chloroflexota;c__Anaerolineae;o__DUEN01;f__DUEN01;g__;s__	949	2248550	0	1.72	0	1.72	50.99	10	42.792
H89_887	<50% completeness AND/OR >10% contamination	hotsprings	d__Bacteria;p__Chloroflexota;c__Anaerolineae;o__DUEN01;f__DUEN01;g__;s__	342	777410	0	1.72	0	1.72	21.82	0	17.456
W60_170	<50% completeness AND/OR >10% contamination	water	d__Bacteria;p__Chloroflexota;c__Anaerolineae;o__E26-bin7;f__;g__;s__	1002	2163180	0	11.13	15.38	9.41821	39.31	25	36.448
M62_269	<50% completeness AND/OR >10% contamination	marine	d__Bacteria;p__Chloroflexota;c__Anaerolineae;o__E26-bin7;f__E26-bin7;g__;s__	675	1518230	0	0	0	0	42.87	30	40.296
M22_22	<50% completeness AND/OR >10% contamination	marine	d__Bacteria;p__Chloroflexota;c__Anaerolineae;o__E26-bin7;f__E26-bin7;g__E26-bin7;s__	891	1812830	0.525146	6.66	75	1.665	41.64	15	36.312
M30_45	<50% completeness AND/OR >10% contamination	marine	d__Bacteria;p__Chloroflexota;c__Anaerolineae;o__E26-bin7;f__E26-bin7;g__E26-bin7;s__	1756	4077540	0	8.62	83.33	1.43695	49.29	25	44.432
M30_66	<50% completeness AND/OR >10% contamination	marine	d__Bacteria;p__Chloroflexota;c__Anaerolineae;o__E26-bin7;f__E26-bin7;g__E26-bin7;s__	256	1071380	0.829771	0.16	100	0	25.08	20	24.064
M43_115	<50% completeness AND/OR >10% contamination	marine	d__Bacteria;p__Chloroflexota;c__Anaerolineae;o__E26-bin7;f__E26-bin7;g__E26-bin7;s__	1256	2708160	0	8.62	42.86	4.92547	49.14	40	47.312
M62_278	<50% completeness AND/OR >10% contamination	marine	d__Bacteria;p__Chloroflexota;c__Anaerolineae;o__E26-bin7;f__E26-bin7;g__E26-bin7;s__	1152	3575400	0.306259	2.59	50	1.295	47.74	35	45.192
M9_330	<50% completeness AND/OR >10% contamination	marine	d__Bacteria;p__Chloroflexota;c__Anaerolineae;o__E26-bin7;f__E26-bin7;g__E26-bin7;s__	430	1065160	0.960419	5.17	33.33	3.44684	25.55	50	30.44
H6_569	<50% completeness AND/OR >10% contamination	hotsprings	d__Bacteria;p__Chloroflexota;c__Anaerolineae;o__E26-bin7;f__JACIWR01;g__;s__	786	2368480	0	5.17	0	5.17	48.12	50	48.496
M50_158	<50% completeness AND/OR >10% contamination	marine	d__Bacteria;p__Chloroflexota;c__Anaerolineae;o__E26-bin7;f__JACIWR01;g__;s__	954	2232270	0	4.45	14.29	3.8141	36.57	30	35.256
M58_218	<50% completeness AND/OR >10% contamination	marine	d__Bacteria;p__Chloroflexota;c__Anaerolineae;o__E26-bin7;f__JACIWR01;g__;s__	711	1728410	0	2.59	100	0	24.45	20	23.56
M58_228	<50% completeness AND/OR >10% contamination	marine	d__Bacteria;p__Chloroflexota;c__Anaerolineae;o__E26-bin7;f__JACIWR01;g__;s__	287	771930	2.62329	7.76	13.04	6.7481	34.09	15	30.272
M58_242	<50% completeness AND/OR >10% contamination	marine	d__Bacteria;p__Chloroflexota;c__Anaerolineae;o__E26-bin7;f__JACIWR01;g__;s__	713	1560340	0	0	0	0	37.35	15	32.88
M6_251	<50% completeness AND/OR >10% contamination	marine	d__Bacteria;p__Chloroflexota;c__Anaerolineae;o__E26-bin7;f__JACIWR01;g__;s__	1209	2960400	0	0	0	0	28.53	50	32.824
N6_275	<50% completeness AND/OR >10% contamination	high salt	d__Bacteria;p__Chloroflexota;c__Anaerolineae;o__E26-bin7;f__JACIWR01;g__;s__	257	1032220	0	2.51	100	0	29.31	30	29.448
W105_36	<50% completeness AND/OR >10% contamination	water	d__Bacteria;p__Chloroflexota;c__Anaerolineae;o__E26-bin7;f__JACIWR01;g__;s__	699	1640820	0	1.72	0	1.72	28.12	25	27.496
H33_418	<50% completeness AND/OR >10% contamination	hotsprings	d__Bacteria;p__Chloroflexota;c__Anaerolineae;o__E26-bin7;f__JACIWR01;g__JACIWR01;s__	791	2624270	1.02428	0	0	0	47.79	40	46.232
W92_278	<50% completeness AND/OR >10% contamination	water	d__Bacteria;p__Chloroflexota;c__Anaerolineae;o__JAAYZQ01;f__;g__;s__	1286	3157790	0	1.88	0	1.88	37.87	30	36.296
B77_157	<50% completeness AND/OR >10% contamination	soil	d__Bacteria;p__Chloroflexota;c__Anaerolineae;o__JAAYZQ01;f__JAAYZQ01;g__;s__	1168	2186940	0	7.84	0	7.84	31.2	5	25.96
H33_415	<50% completeness AND/OR >10% contamination	hotsprings	d__Bacteria;p__Chloroflexota;c__Anaerolineae;o__JAAYZQ01;f__JAAYZQ01;g__;s__	870	2332180	0	1.72	100	0	41.69	35	40.352
H79_788	<50% completeness AND/OR >10% contamination	hotsprings	d__Bacteria;p__Chloroflexota;c__Anaerolineae;o__JAAYZQ01;f__JAAYZQ01;g__;s__	836	2.08282e+06	0	0	0	0	25.57	10	22.456
N12_21	<50% completeness AND/OR >10% contamination	high salt	d__Bacteria;p__Chloroflexota;c__Anaerolineae;o__JAAYZQ01;f__JAAYZQ01;g__;s__	1309	3023000	0	5.17	100	0	52.9	35	49.32
N13_36	<50% completeness AND/OR >10% contamination	high salt	d__Bacteria;p__Chloroflexota;c__Anaerolineae;o__JAAYZQ01;f__JAAYZQ01;g__;s__	1260	3020660	0	3.92	50	1.96	54.69	25	48.752
N4_201	<50% completeness AND/OR >10% contamination	high salt	d__Bacteria;p__Chloroflexota;c__Anaerolineae;o__JAAYZQ01;f__JAAYZQ01;g__;s__	1112	2593270	0.438057	2.59	0	2.59	24.14	20	23.312
N5_250	<50% completeness AND/OR >10% contamination	high salt	d__Bacteria;p__Chloroflexota;c__Anaerolineae;o__JAAYZQ01;f__JAAYZQ01;g__;s__	1056	2773030	0	4.62	66.67	1.53985	30.64	90	42.512
B77_155	<50% completeness AND/OR >10% contamination	soil	d__Bacteria;p__Chloroflexota;c__Anaerolineae;o__JAAYZQ01;f__JAAYZQ01;g__JAAYZQ01;s__	1309	3128560	0	15.52	21.43	12.1941	46.08	30	42.864
H80_795	<50% completeness AND/OR >10% contamination	hotsprings	d__Bacteria;p__Chloroflexota;c__Anaerolineae;o__Promineofilales;f__Promineofilaceae;g__GCA-2746795;s__	404	1411910	0	12.99	80	2.598	35.74	35	35.592
H80_796	<50% completeness AND/OR >10% contamination	hotsprings	d__Bacteria;p__Chloroflexota;c__Anaerolineae;o__Promineofilales;f__Promineofilaceae;g__J033;s__	928	2924320	0	17.24	41.67	10.0561	47.02	40	45.616
B51_110	<50% completeness AND/OR >10% contamination	soil	d__Bacteria;p__Chloroflexota;c__Anaerolineae;o__Promineofilales;f__Promineofilaceae;g__Promineofilum;s__	1145	3169660	0	7.84	54.55	3.56328	52.27	30	47.816
B51_111	<50% completeness AND/OR >10% contamination	soil	d__Bacteria;p__Chloroflexota;c__Anaerolineae;o__Promineofilales;f__Promineofilaceae;g__Promineofilum;s__	1508	3037420	0	6.5	50	3.25	44.42	45	44.536
B52_124	<50% completeness AND/OR >10% contamination	soil	d__Bacteria;p__Chloroflexota;c__Anaerolineae;o__Promineofilales;f__Promineofilaceae;g__Promineofilum;s__	1231	2885200	0	10.66	20	8.528	36.68	35	36.344
B52_125	<50% completeness AND/OR >10% contamination	soil	d__Bacteria;p__Chloroflexota;c__Anaerolineae;o__Promineofilales;f__Promineofilaceae;g__Promineofilum;s__	395	999220	0	11.91	68.75	3.72188	29.4	15	26.52
R830_260	<50% completeness AND/OR >10% contamination	bioreactor	d__Bacteria;p__Chloroflexota;c__Anaerolineae;o__Promineofilales;f__Promineofilaceae;g__Promineofilum;s__	872	3342680	0	6.03	50	3.015	40.25	55	43.2
R830_271	<50% completeness AND/OR >10% contamination	bioreactor	d__Bacteria;p__Chloroflexota;c__Anaerolineae;o__Promineofilales;f__Promineofilaceae;g__Promineofilum;s__	967	2383910	0	5.17	33.33	3.44684	45.3	40	44.24
R830_273	<50% completeness AND/OR >10% contamination	bioreactor	d__Bacteria;p__Chloroflexota;c__Anaerolineae;o__Promineofilales;f__Promineofilaceae;g__Promineofilum;s__	217	1034040	0	1.72	0	1.72	25.31	50	30.248
R94_297	<50% completeness AND/OR >10% contamination	bioreactor	d__Bacteria;p__Chloroflexota;c__Anaerolineae;o__Promineofilales;f__Promineofilaceae;g__Promineofilum;s__	905	2145180	0	0.86	0	0.86	48.22	20	42.576
R95_319	<50% completeness AND/OR >10% contamination	bioreactor	d__Bacteria;p__Chloroflexota;c__Anaerolineae;o__Promineofilales;f__Promineofilaceae;g__Promineofilum;s__	426	2662810	0	4.08	50	2.04	42.32	60	45.856
R95_329	<50% completeness AND/OR >10% contamination	bioreactor	d__Bacteria;p__Chloroflexota;c__Anaerolineae;o__Promineofilales;f__Promineofilaceae;g__Promineofilum;s__	477	1246190	0	1.72	73.33	0.458724	31.71	20	29.368
F3_90	<50% completeness AND/OR >10% contamination	microbial mats	d__Bacteria;p__Chloroflexota;c__Anaerolineae;o__SBR1031;f__A4b;g__;s__	1410	3530490	0	2.59	50	1.295	37.79	25	35.232
F7_117	<50% completeness AND/OR >10% contamination	microbial mats	d__Bacteria;p__Chloroflexota;c__Anaerolineae;o__SBR1031;f__A4b;g__;s__	1208	2920470	0.281462	6.9	33.33	4.60023	48.12	20	42.496
H14_147	<50% completeness AND/OR >10% contamination	hotsprings	d__Bacteria;p__Chloroflexota;c__Anaerolineae;o__SBR1031;f__A4b;g__;s__	473	1126100	0.796554	0	0	0	27.7	25	27.16
H18_206	<50% completeness AND/OR >10% contamination	hotsprings	d__Bacteria;p__Chloroflexota;c__Anaerolineae;o__SBR1031;f__A4b;g__;s__	140	1507680	0.946487	0	0	0	33.7	40	34.96
H23_310	<50% completeness AND/OR >10% contamination	hotsprings	d__Bacteria;p__Chloroflexota;c__Anaerolineae;o__SBR1031;f__A4b;g__;s__	772	1675650	0.71435	3.45	0	3.45	36.83	15	32.464
H63_657	<50% completeness AND/OR >10% contamination	hotsprings	d__Bacteria;p__Chloroflexota;c__Anaerolineae;o__SBR1031;f__A4b;g__;s__	479	1122690	0.342926	1.72	0	1.72	33.31	15	29.648
H69_724	<50% completeness AND/OR >10% contamination	hotsprings	d__Bacteria;p__Chloroflexota;c__Anaerolineae;o__SBR1031;f__A4b;g__;s__	26	4424960	19.7774	0	0	0	100	95	99
F14_16	<50% completeness AND/OR >10% contamination	microbial mats	d__Bacteria;p__Chloroflexota;c__Anaerolineae;o__SBR1031;f__A4b;g__CAIRDJ01;s__	552	1160600	0.89695	1.38	60	0.552	34.58	15	30.664
F14_23	<50% completeness AND/OR >10% contamination	microbial mats	d__Bacteria;p__Chloroflexota;c__Anaerolineae;o__SBR1031;f__A4b;g__CAIRDJ01;s__	374	774970	0	0	0	0	25.45	5	21.36
H18_197	<50% completeness AND/OR >10% contamination	hotsprings	d__Bacteria;p__Chloroflexota;c__Anaerolineae;o__SBR1031;f__A4b;g__CAIRDJ01;s__	1145	2467500	0.458764	9.04	23.08	6.95357	48.98	30	45.184
H81_807	<50% completeness AND/OR >10% contamination	hotsprings	d__Bacteria;p__Chloroflexota;c__Anaerolineae;o__SBR1031;f__A4b;g__CFX2;s__	1646	3814670	0.249825	13.71	0	13.71	44.91	50	45.928
H81_812	<50% completeness AND/OR >10% contamination	hotsprings	d__Bacteria;p__Chloroflexota;c__Anaerolineae;o__SBR1031;f__A4b;g__CFX2;s__	1005	3711880	0.408957	17.16	16.67	14.2994	54.55	55	54.64
F7_119	<50% completeness AND/OR >10% contamination	microbial mats	d__Bacteria;p__Chloroflexota;c__Anaerolineae;o__SBR1031;f__A4b;g__GCA-2699585;s__	806	2055460	0.588676	8.15	7.69	7.52327	25.89	40	28.712
H18_195	<50% completeness AND/OR >10% contamination	hotsprings	d__Bacteria;p__Chloroflexota;c__Anaerolineae;o__SBR1031;f__A4b;g__GCA-2699585;s__	944	2211900	0.296578	0	0	0	44.83	30	41.864
H14_146	<50% completeness AND/OR >10% contamination	hotsprings	d__Bacteria;p__Chloroflexota;c__Anaerolineae;o__SBR1031;f__A4b;g__GCA-2702065;s__	1036	2494960	0.16393	0	0	0	27.85	50	32.28
H18_207	<50% completeness AND/OR >10% contamination	hotsprings	d__Bacteria;p__Chloroflexota;c__Anaerolineae;o__SBR1031;f__A4b;g__J038;s__	115	1227190	0	0	0	0	26.49	50	31.192
H18_208	<50% completeness AND/OR >10% contamination	hotsprings	d__Bacteria;p__Chloroflexota;c__Anaerolineae;o__SBR1031;f__A4b;g__J038;s__	243	1518980	0	0	0	0	28.21	30	28.568
H12_129	<50% completeness AND/OR >10% contamination	hotsprings	d__Bacteria;p__Chloroflexota;c__Anaerolineae;o__SBR1031;f__A4b;g__OLB15;s__	515	1219170	0.446205	0	0	0	45.06	35	43.048
H15_160	<50% completeness AND/OR >10% contamination	hotsprings	d__Bacteria;p__Chloroflexota;c__Anaerolineae;o__SBR1031;f__A4b;g__OLB15;s__	597	1453450	0.605456	0.31	50	0.155	37.07	35	36.656
S18_113	<50% completeness AND/OR >10% contamination	corals/sponges	d__Bacteria;p__Chloroflexota;c__Anaerolineae;o__SBR1031;f__A4b;g__UBA6055;s__	827	3126030	1.03486	15.28	21.43	12.0055	62.54	55	61.032
S21_132	<50% completeness AND/OR >10% contamination	corals/sponges	d__Bacteria;p__Chloroflexota;c__Anaerolineae;o__SBR1031;f__A4b;g__UBA6055;s__	812	1611630	0.448614	5.3	55.56	2.35532	40.83	20	36.664
S25_174	<50% completeness AND/OR >10% contamination	corals/sponges	d__Bacteria;p__Chloroflexota;c__Anaerolineae;o__SBR1031;f__A4b;g__UBA6055;s__	480	1070350	0	0	0	0	27.16	10	23.728
S27_190	<50% completeness AND/OR >10% contamination	corals/sponges	d__Bacteria;p__Chloroflexota;c__Anaerolineae;o__SBR1031;f__A4b;g__UBA6055;s__	558	1174390	0.132835	0	0	0	34.85	10	29.88
S3_221	<50% completeness AND/OR >10% contamination	corals/sponges	d__Bacteria;p__Chloroflexota;c__Anaerolineae;o__SBR1031;f__A4b;g__UBA6055;s__	554	1235060	1.15622	1.72	0	1.72	17.27	15	16.816
S32_239	<50% completeness AND/OR >10% contamination	corals/sponges	d__Bacteria;p__Chloroflexota;c__Anaerolineae;o__SBR1031;f__A4b;g__UBA6055;s__	447	1735130	2.11281	3.45	0	3.45	42.27	35	40.816
S32_240	<50% completeness AND/OR >10% contamination	corals/sponges	d__Bacteria;p__Chloroflexota;c__Anaerolineae;o__SBR1031;f__A4b;g__UBA6055;s__	721	2235900	0.58008	9.76	38.89	5.96434	42.99	50	44.392
S32_263	<50% completeness AND/OR >10% contamination	corals/sponges	d__Bacteria;p__Chloroflexota;c__Anaerolineae;o__SBR1031;f__A4b;g__UBA6055;s__	651	1428130	0	5.17	66.67	1.72316	30.92	15	27.736
S4_312	<50% completeness AND/OR >10% contamination	corals/sponges	d__Bacteria;p__Chloroflexota;c__Anaerolineae;o__SBR1031;f__A4b;g__UBA6055;s__	160	1734200	0.871295	0	0	0	37.77	50	40.216
S7_343	<50% completeness AND/OR >10% contamination	corals/sponges	d__Bacteria;p__Chloroflexota;c__Anaerolineae;o__SBR1031;f__A4b;g__UBA6055;s__	715	2042080	0.221343	13.01	50	6.505	35.27	30	34.216
S7_346	<50% completeness AND/OR >10% contamination	corals/sponges	d__Bacteria;p__Chloroflexota;c__Anaerolineae;o__SBR1031;f__A4b;g__UBA6055;s__	835	2134490	0.596864	7.05	20	5.64	36.33	40	37.064
S7_350	<50% completeness AND/OR >10% contamination	corals/sponges	d__Bacteria;p__Chloroflexota;c__Anaerolineae;o__SBR1031;f__A4b;g__UBA6055;s__	788	2.08964e+06	0	0	0	0	39.34	30	37.472
S27_194	<50% completeness AND/OR >10% contamination	corals/sponges	d__Bacteria;p__Chloroflexota;c__Anaerolineae;o__SBR1031;f__A4b;g__UBA6055;s__UBA6055 sp009841405	727	1665890	0.4286	0	0	0	34.18	15	30.344
S8_385	<50% completeness AND/OR >10% contamination	corals/sponges	d__Bacteria;p__Chloroflexota;c__Anaerolineae;o__SBR1031;f__A4b;g__WTGJ01;s__	381	1163750	1.29581	3.45	100	0	25.13	35	27.104
H81_813	<50% completeness AND/OR >10% contamination	hotsprings	d__Bacteria;p__Chloroflexota;c__Anaerolineae;o__SBR1031;f__A4b;g__ZC4RG36;s__	1132	2624180	0.510255	1.72	0	1.72	46.83	20	41.464
H63_656	<50% completeness AND/OR >10% contamination	hotsprings	d__Bacteria;p__Chloroflexota;c__Anaerolineae;o__SBR1031;f__Ch27;g__;s__	914	2106710	0	6.9	0	6.9	37.02	15	32.616
N5_237	<50% completeness AND/OR >10% contamination	high salt	d__Bacteria;p__Chloroflexota;c__Anaerolineae;o__SBR1031;f__Ch27;g__Ch27;s__	865	1942570	0.310928	0	0	0	21.71	40	25.368
R24_81	<50% completeness AND/OR >10% contamination	bioreactor	d__Bacteria;p__Chloroflexota;c__Anaerolineae;o__SBR1031;f__Ch27;g__Ch27;s__	993	2005570	0.424318	3.45	100	0	33.39	5	27.712
H62_627	<50% completeness AND/OR >10% contamination	hotsprings	d__Bacteria;p__Chloroflexota;c__Anaerolineae;o__SBR1031;f__J027;g__;s__	772	1747290	1.27054	0	0	0	50.69	10	42.552
H18_211	<50% completeness AND/OR >10% contamination	hotsprings	d__Bacteria;p__Chloroflexota;c__Anaerolineae;o__SBR1031;f__J027;g__J027;s__	529	1231710	0	0	0	0	30.88	15	27.704
F14_32	<50% completeness AND/OR >10% contamination	microbial mats	d__Bacteria;p__Chloroflexota;c__Anaerolineae;o__SBR1031;f__J027;g__JAAUUD01;s__	1324	3097930	0	2.9	0	2.9	42.52	30	40.016
H111_71	<50% completeness AND/OR >10% contamination	hotsprings	d__Bacteria;p__Chloroflexota;c__Anaerolineae;o__SBR1031;f__UBA2029;g__;s__	551	1144590	0	0	0	0	14.94	20	15.952
H18_213	<50% completeness AND/OR >10% contamination	hotsprings	d__Bacteria;p__Chloroflexota;c__Anaerolineae;o__SBR1031;f__UBA2029;g__;s__	660	1429580	0	1.88	0	1.88	32.77	10	28.216
H21_248	<50% completeness AND/OR >10% contamination	hotsprings	d__Bacteria;p__Chloroflexota;c__Anaerolineae;o__SBR1031;f__UBA2029;g__;s__	968	2415570	0	0.86	0	0.86	49.86	25	44.888
R115_24	<50% completeness AND/OR >10% contamination	bioreactor	d__Bacteria;p__Chloroflexota;c__Anaerolineae;o__SBR1031;f__UBA2029;g__;s__	1151	3145460	0.455259	0	0	0	51.25	30	47
R800_216	<50% completeness AND/OR >10% contamination	bioreactor	d__Bacteria;p__Chloroflexota;c__Anaerolineae;o__SBR1031;f__UBA2029;g__MO-CFX2;s__	622	1382510	0.8839	0	0	0	26.6	5	22.28
N5_245	<50% completeness AND/OR >10% contamination	high salt	d__Bacteria;p__Chloroflexota;c__Anaerolineae;o__SBR1031;f__UBA2029;g__TC-15;s__	1082	2571950	0	1.88	33.33	1.2534	39.76	30	37.808
H28_385	<50% completeness AND/OR >10% contamination	hotsprings	d__Bacteria;p__Chloroflexota;c__Anaerolineae;o__SBR1031;f__UBA2796;g__CP2-2F;s__	658	1607160	0	1.72	0	1.72	49.31	35	46.448
F3_84	<50% completeness AND/OR >10% contamination	microbial mats	d__Bacteria;p__Chloroflexota;c__Anaerolineae;o__SBR1031;f__UBA2796;g__UBA2796;s__	621	1335000	0	0	0	0	37.3	20	33.84
R115_22	<50% completeness AND/OR >10% contamination	bioreactor	d__Bacteria;p__Chloroflexota;c__Anaerolineae;o__SBR1031;f__UBA3940;g__;s__	20	4361930	14.7983	0	0	0	98.28	95	97.624
N6_268	<50% completeness AND/OR >10% contamination	high salt	d__Bacteria;p__Chloroflexota;c__Anaerolineae;o__SBR1031;f__UBA3940;g__DRKO01;s__	652	1330190	0.311986	0.31	0	0.31	26.1	25	25.88
W92_276	<50% completeness AND/OR >10% contamination	water	d__Bacteria;p__Chloroflexota;c__Anaerolineae;o__SBR1031;f__UBA3940;g__UBA3940;s__	1607	4080900	0	0	0	0	48.13	25	43.504
H111_73	<50% completeness AND/OR >10% contamination	hotsprings	d__Bacteria;p__Chloroflexota;c__Anaerolineae;o__SpSt-313;f__SpSt-313;g__;s__	797	2054710	0	8.62	37.5	5.3875	23.04	35	25.432
H100_4	<50% completeness AND/OR >10% contamination	hotsprings	d__Bacteria;p__Chloroflexota;c__Anaerolineae;o__Thermoflexales;f__J036;g__Roseilinea;s__	477	1111560	1.00579	0.16	100	0	31.47	30	31.176
H113_109	<50% completeness AND/OR >10% contamination	hotsprings	d__Bacteria;p__Chloroflexota;c__Anaerolineae;o__Thermoflexales;f__J036;g__Roseilinea;s__	688	3178570	0.670427	18.26	30	12.782	82.76	90	84.208
H33_442	<50% completeness AND/OR >10% contamination	hotsprings	d__Bacteria;p__Chloroflexota;c__Anaerolineae;o__Thermoflexales;f__J036;g__Roseilinea;s__	146	899750	0	0	0	0	46.55	50	47.24
H36_458	<50% completeness AND/OR >10% contamination	hotsprings	d__Bacteria;p__Chloroflexota;c__Anaerolineae;o__Thermoflexales;f__J036;g__Roseilinea;s__	303	1320340	0	1.72	0	1.72	23.28	40	26.624
H36_460	<50% completeness AND/OR >10% contamination	hotsprings	d__Bacteria;p__Chloroflexota;c__Anaerolineae;o__Thermoflexales;f__J036;g__Roseilinea;s__	188	928510	0	0.78	100	0	25.55	40	28.44
H61_614	<50% completeness AND/OR >10% contamination	hotsprings	d__Bacteria;p__Chloroflexota;c__Anaerolineae;o__Thermoflexales;f__J036;g__Roseilinea;s__	848	2124980	0	0.34	100	0	50.16	30	46.128
H94_896	<50% completeness AND/OR >10% contamination	hotsprings	d__Bacteria;p__Chloroflexota;c__Anaerolineae;o__Thermoflexales;f__Thermoflexaceae;g__Thermoflexus;s__Thermoflexus hugenholtzii	245	1103280	0	1.72	100	0	44.2	40	43.36
W60_157	<50% completeness AND/OR >10% contamination	water	d__Bacteria;p__Chloroflexota;c__Anaerolineae;o__UBA1429;f__;g__;s__	533	1126880	0	3.45	50	1.725	26.65	5	22.32
H111_95	<50% completeness AND/OR >10% contamination	hotsprings	d__Bacteria;p__Chloroflexota;c__Anaerolineae;o__UBA1429;f__UBA1429;g__;s__	402	924680	0	0	0	0	40.58	30	38.464
H25_355	<50% completeness AND/OR >10% contamination	hotsprings	d__Bacteria;p__Chloroflexota;c__Anaerolineae;o__UBA1429;f__UBA1429;g__;s__	366	865270	0	0	0	0	48.2	30	44.56
M11_5	<50% completeness AND/OR >10% contamination	marine	d__Bacteria;p__Chloroflexota;c__Anaerolineae;o__UBA1429;f__UBA1429;g__;s__	1170	2443690	0	15.83	7.69	14.6127	61.44	30	55.152
N6_270	<50% completeness AND/OR >10% contamination	high salt	d__Bacteria;p__Chloroflexota;c__Anaerolineae;o__UBA1429;f__UBA1429;g__;s__	576	1423200	0	0	0	0	40.92	25	37.736
N9_399	<50% completeness AND/OR >10% contamination	high salt	d__Bacteria;p__Chloroflexota;c__Anaerolineae;o__UBA1429;f__UBA1429;g__;s__	374	896460	0	0	0	0	12.74	10	12.192
R118_42	<50% completeness AND/OR >10% contamination	bioreactor	d__Bacteria;p__Chloroflexota;c__Anaerolineae;o__UBA1429;f__UBA1429;g__DUUT01;s__DUUT01 sp012841405	1034	2426200	0	12.7	7.14	11.7932	55.84	60	56.672
M52_177	<50% completeness AND/OR >10% contamination	marine	d__Bacteria;p__Chloroflexota;c__Anaerolineae;o__UBA1429;f__UBA1429;g__JAAYDC01;s__	364	787130	0	0	0	0	26.96	5	22.568
R95_307	<50% completeness AND/OR >10% contamination	bioreactor	d__Bacteria;p__Chloroflexota;c__Anaerolineae;o__UBA1429;f__UBA1429;g__JAAYDC01;s__	625	1551150	0	0	0	0	48.64	55	49.912
R45_142	<50% completeness AND/OR >10% contamination	bioreactor	d__Bacteria;p__Chloroflexota;c__Anaerolineae;o__UBA1429;f__UBA1429;g__JAAYDS01;s__	718	1572660	0	3.92	0	3.92	47.48	35	44.984
H21_263	<50% completeness AND/OR >10% contamination	hotsprings	d__Bacteria;p__Chloroflexota;c__Anaerolineae;o__UBA2200;f__;g__;s__	744	1525040	0	1.88	0	1.88	27.77	40	30.216
N4_203	<50% completeness AND/OR >10% contamination	high salt	d__Bacteria;p__Chloroflexota;c__Anaerolineae;o__UBA2200;f__;g__;s__	892	2.06934e+06	0	2.35	0	2.35	19.22	30	21.376
W60_166	<50% completeness AND/OR >10% contamination	water	d__Bacteria;p__Chloroflexota;c__Anaerolineae;o__UBA2200;f__;g__;s__	686	1539490	0	0	0	0	18.87	15	18.096
M22_34	<50% completeness AND/OR >10% contamination	marine	d__Bacteria;p__Chloroflexota;c__Anaerolineae;o__UBA2200;f__UBA2200;g__;s__	761	3386830	0	13.95	18.75	11.3344	62.15	70	63.72
M43_132	<50% completeness AND/OR >10% contamination	marine	d__Bacteria;p__Chloroflexota;c__Anaerolineae;o__UBA2200;f__UBA2200;g__;s__	598	1868000	0	5.17	0	5.17	36.19	20	32.952
M8_305	<50% completeness AND/OR >10% contamination	marine	d__Bacteria;p__Chloroflexota;c__Anaerolineae;o__UBA2200;f__UBA2200;g__;s__	1000	2927720	0	4.31	0	4.31	19.75	100	35.8
N14_49	<50% completeness AND/OR >10% contamination	high salt	d__Bacteria;p__Chloroflexota;c__Anaerolineae;o__UBA2200;f__UBA2200;g__;s__	691	1797580	0.884523	3.45	0	3.45	50.02	45	49.016
N2_73	<50% completeness AND/OR >10% contamination	high salt	d__Bacteria;p__Chloroflexota;c__Anaerolineae;o__UBA2200;f__UBA2200;g__;s__	374	868850	0	0	0	0	31.48	20	29.184
H101_8	<50% completeness AND/OR >10% contamination	hotsprings	d__Bacteria;p__Chloroflexota;c__Anaerolineae;o__UBA2200;f__UBA2200;g__JACIWX01;s__	481	1359050	0	0	0	0	19.58	25	20.664
H84_858	<50% completeness AND/OR >10% contamination	hotsprings	d__Bacteria;p__Chloroflexota;c__Anaerolineae;o__UBA2200;f__UBA2200;g__JACIWX01;s__	175	438980	0	0	0	0	25	10	22
N4_193	<50% completeness AND/OR >10% contamination	high salt	d__Bacteria;p__Chloroflexota;c__Anaerolineae;o__UBA3071;f__UBA3071;g__;s__	777	1900370	0	1.18	0	1.18	26.65	15	24.32
H103_17	<50% completeness AND/OR >10% contamination	hotsprings	d__Bacteria;p__Chloroflexota;c__Anaerolineae;o__UBA4142;f__UBA4142;g__;s__	227	1349670	0	4.08	56.25	1.785	39.03	55	42.224
H21_264	<50% completeness AND/OR >10% contamination	hotsprings	d__Bacteria;p__Chloroflexota;c__Anaerolineae;o__UBA4142;f__UBA4142;g__;s__	567	1199040	0	0.31	0	0.31	36.22	20	32.976
H68_707	<50% completeness AND/OR >10% contamination	hotsprings	d__Bacteria;p__Chloroflexota;c__Anaerolineae;o__UBA4142;f__UBA4142;g__;s__	355	707160	0	0	0	0	30.34	5	25.272
H82_839	<50% completeness AND/OR >10% contamination	hotsprings	d__Bacteria;p__Chloroflexota;c__Anaerolineae;o__UBA4142;f__UBA4142;g__;s__	419	1141360	0	0	0	0	25.33	25	25.264
H105_24	<50% completeness AND/OR >10% contamination	hotsprings	d__Bacteria;p__Chloroflexota;c__Anaerolineae;o__UBA4142;f__UBA4142;g__CAIKBD01;s__	877	2245860	0	2.04	25	1.53	31.16	10	26.928
H55_529	<50% completeness AND/OR >10% contamination	hotsprings	d__Bacteria;p__Chloroflexota;c__Anaerolineae;o__UBA4142;f__UBA4142;g__UBA4142;s__	716	1789840	0	2.74	66.67	0.913242	55.01	20	48.008
H79_790	<50% completeness AND/OR >10% contamination	hotsprings	d__Bacteria;p__Chloroflexota;c__Anaerolineae;o__UBA7937;f__B3-Chlor;g__;s__	609	1823030	0	0	0	0	51.39	40	49.112
N8_375	<50% completeness AND/OR >10% contamination	high salt	d__Bacteria;p__Chloroflexota;c__Anaerolineae;o__UBA7937;f__B3-Chlor;g__;s__	373	837150	0	0	0	0	33.03	10	28.424
W105_26	<50% completeness AND/OR >10% contamination	water	d__Bacteria;p__Chloroflexota;c__Anaerolineae;o__UBA7937;f__B3-Chlor;g__;s__	841	1816430	0	12.38	0	12.38	45.67	15	39.536
W61_189	<50% completeness AND/OR >10% contamination	water	d__Bacteria;p__Chloroflexota;c__Anaerolineae;o__UBA7937;f__B3-Chlor;g__;s__	1339	2981010	0	2.04	66.67	0.679932	38.8	65	44.04
W73_233	<50% completeness AND/OR >10% contamination	water	d__Bacteria;p__Chloroflexota;c__Anaerolineae;o__UBA7937;f__B3-Chlor;g__;s__	914	1775300	0	5.8	28.57	4.14294	32.71	45	35.168
M9_312	<50% completeness AND/OR >10% contamination	marine	d__Bacteria;p__Chloroflexota;c__Anaerolineae;o__UBA7937;f__B3-Chlor;g__B3-Chlor;s__	888	2409580	0	3.76	25	2.82	53.21	35	49.568
W60_163	<50% completeness AND/OR >10% contamination	water	d__Bacteria;p__Chloroflexota;c__Anaerolineae;o__UBA7937;f__B3-Chlor;g__B3-Chlor;s__	628	1688540	0	10.34	41.67	6.03132	51.8	40	49.44
W60_169	<50% completeness AND/OR >10% contamination	water	d__Bacteria;p__Chloroflexota;c__Anaerolineae;o__UBA7937;f__B3-Chlor;g__B3-Chlor;s__	1010	2321870	0	13.48	0	13.48	52.41	45	50.928
W60_173	<50% completeness AND/OR >10% contamination	water	d__Bacteria;p__Chloroflexota;c__Anaerolineae;o__UBA7937;f__B3-Chlor;g__B3-Chlor;s__	280	1061990	0	0.86	0	0.86	53.29	30	48.632
W105_29	<50% completeness AND/OR >10% contamination	water	d__Bacteria;p__Chloroflexota;c__Anaerolineae;o__UBA7937;f__UBA7937;g__;s__	1060	2551310	0.207736	4.64	11.11	4.1245	34.58	30	33.664
W44_101	<50% completeness AND/OR >10% contamination	water	d__Bacteria;p__Chloroflexota;c__Anaerolineae;o__UBA7937;f__UBA7937;g__;s__	410	1184690	0	5.33	60	2.132	46.88	15	40.504
W44_96	<50% completeness AND/OR >10% contamination	water	d__Bacteria;p__Chloroflexota;c__Anaerolineae;o__UBA7937;f__UBA7937;g__;s__	273	646350	0.940667	0.16	0	0.16	17.02	10	15.616
W7_230	<50% completeness AND/OR >10% contamination	water	d__Bacteria;p__Chloroflexota;c__Anaerolineae;o__UBA7937;f__UBA7937;g__;s__	271	567200	0	0	0	0	25.08	15	23.064
W105_28	<50% completeness AND/OR >10% contamination	water	d__Bacteria;p__Chloroflexota;c__Anaerolineae;o__UBA7937;f__UBA7937;g__UBA7937;s__	489	1441080	0.370555	0	0	0	46.7	25	42.36
W60_156	<50% completeness AND/OR >10% contamination	water	d__Bacteria;p__Chloroflexota;c__Anaerolineae;o__UBA7937;f__UBA7937;g__UBA7937;s__	487	1294080	0	6.9	50	3.45	41.95	30	39.56
M52_185	<50% completeness AND/OR >10% contamination	marine	d__Bacteria;p__Chloroflexota;c__Anaerolineae;o__UCB3;f__;g__;s__	1032	2716490	0	7.68	50	3.84	44.4	25	40.52
H71_747	<50% completeness AND/OR >10% contamination	hotsprings	d__Bacteria;p__Chloroflexota;c__Chloroflexia;o__Chloroflexales;f__Chloroflexaceae;g__CAIWXH01;s__	672	1529800	0.162766	0.69	0	0.69	25.02	15	23.016
W101_19	<50% completeness AND/OR >10% contamination	water	d__Bacteria;p__Chloroflexota;c__Chloroflexia;o__Chloroflexales;f__Chloroflexaceae;g__CAIWXH01;s__	774	3294980	0.152353	8.15	86.67	1.08639	27.41	90	39.928
W103_24	<50% completeness AND/OR >10% contamination	water	d__Bacteria;p__Chloroflexota;c__Chloroflexia;o__Chloroflexales;f__Chloroflexaceae;g__CAIWXH01;s__	837	3695500	0.402381	0	0	0	36.36	75	44.088
W40_87	<50% completeness AND/OR >10% contamination	water	d__Bacteria;p__Chloroflexota;c__Chloroflexia;o__Chloroflexales;f__Chloroflexaceae;g__CAIWXH01;s__	1722	4705340	0.149192	4.08	100	0	35.8	65	41.64
W40_88	<50% completeness AND/OR >10% contamination	water	d__Bacteria;p__Chloroflexota;c__Chloroflexia;o__Chloroflexales;f__Chloroflexaceae;g__CAIWXH01;s__	590	2738060	0	0	0	0	28.37	55	33.696
H103_20	<50% completeness AND/OR >10% contamination	hotsprings	d__Bacteria;p__Chloroflexota;c__Chloroflexia;o__Chloroflexales;f__Chloroflexaceae;g__Chloroflexus;s__	678	1556500	0	1.72	0	1.72	40.28	20	36.224
H32_408	<50% completeness AND/OR >10% contamination	hotsprings	d__Bacteria;p__Chloroflexota;c__Chloroflexia;o__Chloroflexales;f__Chloroflexaceae;g__Chloroflexus;s__Chloroflexus sp000735195	729	2375650	0.218046	0.31	100	0	45.99	55	47.792
H12_121	<50% completeness AND/OR >10% contamination	hotsprings	d__Bacteria;p__Chloroflexota;c__Chloroflexia;o__Chloroflexales;f__Chloroflexaceae;g__OHK40;s__	597	1459430	0	6.9	75	1.725	45.92	10	38.736
H89_881	<50% completeness AND/OR >10% contamination	hotsprings	d__Bacteria;p__Chloroflexota;c__Chloroflexia;o__Chloroflexales;f__Roseiflexaceae;g__;s__	725	1660270	0	0	0	0	32.12	15	28.696
R118_33	<50% completeness AND/OR >10% contamination	bioreactor	d__Bacteria;p__Chloroflexota;c__Chloroflexia;o__Chloroflexales;f__Roseiflexaceae;g__Kouleothrix;s__	333	640060	0	0	0	0	17.4	5	14.92
H113_117	<50% completeness AND/OR >10% contamination	hotsprings	d__Bacteria;p__Chloroflexota;c__Chloroflexia;o__Chloroflexales;f__Roseiflexaceae;g__Roseiflexus;s__	1233	3019800	0	11.13	90.91	1.01172	37.85	35	37.28
H27_370	<50% completeness AND/OR >10% contamination	hotsprings	d__Bacteria;p__Chloroflexota;c__Chloroflexia;o__Chloroflexales;f__Roseiflexaceae;g__Roseiflexus;s__	124	1256200	0	0	0	0	31.97	60	37.576
H27_374	<50% completeness AND/OR >10% contamination	hotsprings	d__Bacteria;p__Chloroflexota;c__Chloroflexia;o__Chloroflexales;f__Roseiflexaceae;g__Roseiflexus;s__	733	1819030	0	3.45	100	0	31.18	25	29.944
H33_430	<50% completeness AND/OR >10% contamination	hotsprings	d__Bacteria;p__Chloroflexota;c__Chloroflexia;o__Chloroflexales;f__Roseiflexaceae;g__Roseiflexus;s__	1399	3184550	0	4.97	100	0	47.34	30	43.872
H38_468	<50% completeness AND/OR >10% contamination	hotsprings	d__Bacteria;p__Chloroflexota;c__Chloroflexia;o__Chloroflexales;f__Roseiflexaceae;g__Roseiflexus;s__	331	1271260	2.01454	1.72	100	0	17.24	30	19.792
H6_554	<50% completeness AND/OR >10% contamination	hotsprings	d__Bacteria;p__Chloroflexota;c__Chloroflexia;o__Chloroflexales;f__Roseiflexaceae;g__Roseiflexus;s__	1332	3455360	0	12.07	100	0	43.42	40	42.736
H6_571	<50% completeness AND/OR >10% contamination	hotsprings	d__Bacteria;p__Chloroflexota;c__Chloroflexia;o__Chloroflexales;f__Roseiflexaceae;g__Roseiflexus;s__	326	1809120	1.41616	0	0	0	33.62	45	35.896
H6_578	<50% completeness AND/OR >10% contamination	hotsprings	d__Bacteria;p__Chloroflexota;c__Chloroflexia;o__Chloroflexales;f__Roseiflexaceae;g__Roseiflexus;s__	526	1594950	0	2.74	100	0	50	30	46
H109_42	<50% completeness AND/OR >10% contamination	hotsprings	d__Bacteria;p__Chloroflexota;c__Chloroflexia;o__Chloroflexales;f__Roseiflexaceae;g__Roseiflexus;s__Roseiflexus sp000016665	699	1810170	0	0.34	100	0	47.49	25	42.992
H113_116	<50% completeness AND/OR >10% contamination	hotsprings	d__Bacteria;p__Chloroflexota;c__Chloroflexia;o__Chloroflexales;f__Roseiflexaceae;g__Roseiflexus;s__Roseiflexus sp000016665	325	992590	0	0	0	0	38.14	15	33.512
H28_386	<50% completeness AND/OR >10% contamination	hotsprings	d__Bacteria;p__Chloroflexota;c__Chloroflexia;o__Chloroflexales;f__Roseiflexaceae;g__Roseiflexus;s__Roseiflexus sp000016665	265	686680	0.401934	0.86	100	0	29.56	15	26.648
H29_403	<50% completeness AND/OR >10% contamination	hotsprings	d__Bacteria;p__Chloroflexota;c__Chloroflexia;o__Chloroflexales;f__Roseiflexaceae;g__Roseiflexus;s__Roseiflexus sp000016665	444	1286930	1.21374	0.5	50	0.25	44.91	40	43.928
H34_450	<50% completeness AND/OR >10% contamination	hotsprings	d__Bacteria;p__Chloroflexota;c__Chloroflexia;o__Chloroflexales;f__Roseiflexaceae;g__Roseiflexus;s__Roseiflexus sp000016665	608	1633400	0	0.82	75	0.205	52.59	30	48.072
H35_456	<50% completeness AND/OR >10% contamination	hotsprings	d__Bacteria;p__Chloroflexota;c__Chloroflexia;o__Chloroflexales;f__Roseiflexaceae;g__Roseiflexus;s__Roseiflexus sp000016665	329	1014670	0.1636	2.59	100	0	40.17	25	37.136
H36_459	<50% completeness AND/OR >10% contamination	hotsprings	d__Bacteria;p__Chloroflexota;c__Chloroflexia;o__Chloroflexales;f__Roseiflexaceae;g__Roseiflexus;s__Roseiflexus sp000016665	431	1000920	2.85337	0	0	0	30.33	5	25.264
H38_470	<50% completeness AND/OR >10% contamination	hotsprings	d__Bacteria;p__Chloroflexota;c__Chloroflexia;o__Chloroflexales;f__Roseiflexaceae;g__Roseiflexus;s__Roseiflexus sp000016665	343	1055510	0.684977	0	0	0	37.18	25	34.744
H6_566	<50% completeness AND/OR >10% contamination	hotsprings	d__Bacteria;p__Chloroflexota;c__Chloroflexia;o__Chloroflexales;f__Roseiflexaceae;g__Roseiflexus;s__Roseiflexus sp000016665	280	659100	4.97952	0.34	100	0	25.94	20	24.752
H85_860	<50% completeness AND/OR >10% contamination	hotsprings	d__Bacteria;p__Chloroflexota;c__Chloroflexia;o__DTKN01;f__;g__;s__	782	1886800	0	0.86	0	0.86	14.66	20	15.728
H62_630	<50% completeness AND/OR >10% contamination	hotsprings	d__Bacteria;p__Chloroflexota;c__Chloroflexia;o__DTKN01;f__DTKN01;g__DRUS01;s__	444	970130	0	0	0	0	36.1	0	28.88
H68_712	<50% completeness AND/OR >10% contamination	hotsprings	d__Bacteria;p__Chloroflexota;c__Chloroflexia;o__DTKN01;f__DTKN01;g__DRUS01;s__	390	887330	0	0	0	0	48.48	25	43.784
R900_293	<50% completeness AND/OR >10% contamination	bioreactor	d__Bacteria;p__Chloroflexota;c__Chloroflexia;o__Thermobaculales;f__Thermobaculaceae;g__Thermobaculum;s__Thermobaculum terrenum	554	1402090	1.51274	0	0	0	53.18	15	45.544
M11_13	<50% completeness AND/OR >10% contamination	marine	d__Bacteria;p__Chloroflexota;c__Chloroflexia;o__Thermomicrobiales;f__;g__;s__	1005	2655090	0.233137	8.1	50	4.05	38.97	30	37.176
R118_47	<50% completeness AND/OR >10% contamination	bioreactor	d__Bacteria;p__Chloroflexota;c__Chloroflexia;o__Thermomicrobiales;f__;g__;s__	790	1823570	0.625147	3.45	0	3.45	51.16	25	45.928
H61_612	<50% completeness AND/OR >10% contamination	hotsprings	d__Bacteria;p__Chloroflexota;c__Chloroflexia;o__Thermomicrobiales;f__Thermomicrobiaceae;g__HRBIN26;s__	624	2699350	0.83798	3.45	100	0	44.83	50	45.864
H81_829	<50% completeness AND/OR >10% contamination	hotsprings	d__Bacteria;p__Chloroflexota;c__Chloroflexia;o__Thermomicrobiales;f__Thermomicrobiaceae;g__HRBIN26;s__	184	816670	1.62122	0	0	0	32.21	35	32.768
H94_895	<50% completeness AND/OR >10% contamination	hotsprings	d__Bacteria;p__Chloroflexota;c__Chloroflexia;o__Thermomicrobiales;f__Thermomicrobiaceae;g__HRBIN26;s__	584	1765160	0.407895	0	0	0	40.52	40	40.416
H70_735	<50% completeness AND/OR >10% contamination	hotsprings	d__Bacteria;p__Chloroflexota;c__Chloroflexia;o__Thermomicrobiales;f__Thermomicrobiaceae;g__Thermomicrobium;s__	26	322070	0	2.98	94.74	0.156748	29.47	30	29.576
H70_736	<50% completeness AND/OR >10% contamination	hotsprings	d__Bacteria;p__Chloroflexota;c__Chloroflexia;o__Thermomicrobiales;f__Thermomicrobiaceae;g__Thermomicrobium;s__	351	1193470	1.81152	0	0	0	47.02	40	45.616
H94_897	<50% completeness AND/OR >10% contamination	hotsprings	d__Bacteria;p__Chloroflexota;c__Chloroflexia;o__Thermomicrobiales;f__Thermomicrobiaceae;g__Thermomicrobium;s__	186	506170	4.20807	0	0	0	21.87	20	21.496
M4_84	<50% completeness AND/OR >10% contamination	marine	d__Bacteria;p__Chloroflexota;c__Chloroflexia;o__Thermomicrobiales;f__Thermomicrobiaceae;g__Thermomicrobium;s__	417	896000	0.297991	0	0	0	35.13	25	33.104
R900_295	<50% completeness AND/OR >10% contamination	bioreactor	d__Bacteria;p__Chloroflexota;c__Chloroflexia;o__Thermomicrobiales;f__UBA6265;g__;s__	673	1628940	0.221003	0	0	0	25.13	5	21.104
R30_116	<50% completeness AND/OR >10% contamination	bioreactor	d__Bacteria;p__Chloroflexota;c__Chloroflexia;o__Thermomicrobiales;f__UBA6265;g__JACCVC01;s__	680	1594480	0.806533	0	0	0	44.12	30	41.296
M52_186	<50% completeness AND/OR >10% contamination	marine	d__Bacteria;p__Chloroflexota;c__Chloroflexia;o__Thermomicrobiales;f__UBA6265;g__JACCXM01;s__	714	1826230	0.348806	0	0	0	35.16	20	32.128
H81_822	<50% completeness AND/OR >10% contamination	hotsprings	d__Bacteria;p__Chloroflexota;c__Dehalococcoidia;o__;f__;g__;s__	961	2284580	0	3.45	0	3.45	23.28	30	24.624
M42_95	<50% completeness AND/OR >10% contamination	marine	d__Bacteria;p__Chloroflexota;c__Dehalococcoidia;o__;f__;g__;s__	927	2117530	0	10.96	0	10.96	36.44	65	42.152
S11_59	<50% completeness AND/OR >10% contamination	corals/sponges	d__Bacteria;p__Chloroflexota;c__Dehalococcoidia;o__Bin125;f__Bin125;g__;s__	250	838210	0	2.59	100	0	38.48	45	39.784
S9_407	<50% completeness AND/OR >10% contamination	corals/sponges	d__Bacteria;p__Chloroflexota;c__Dehalococcoidia;o__Bin125;f__Bin125;g__Bin125;s__	499	1597280	0	8.62	42.86	4.92547	50.24	45	49.192
S9_408	<50% completeness AND/OR >10% contamination	corals/sponges	d__Bacteria;p__Chloroflexota;c__Dehalococcoidia;o__Bin125;f__Bin125;g__Bin125;s__	520	1661480	0	5.49	60	2.196	52.07	30	47.656
S24_157	<50% completeness AND/OR >10% contamination	corals/sponges	d__Bacteria;p__Chloroflexota;c__Dehalococcoidia;o__Bin125;f__Bin125;g__TK10-74A;s__	373	802000	0	0	0	0	20.38	10	18.304
S24_158	<50% completeness AND/OR >10% contamination	corals/sponges	d__Bacteria;p__Chloroflexota;c__Dehalococcoidia;o__Bin125;f__Bin125;g__TK10-74A;s__	474	1095510	0	1.72	0	1.72	50.61	40	48.488
S26_185	<50% completeness AND/OR >10% contamination	corals/sponges	d__Bacteria;p__Chloroflexota;c__Dehalococcoidia;o__Bin125;f__Bin125;g__TK10-74A;s__	438	1418890	0.458105	13.35	100	0	35.14	75	43.112
S3_224	<50% completeness AND/OR >10% contamination	corals/sponges	d__Bacteria;p__Chloroflexota;c__Dehalococcoidia;o__Bin125;f__Bin125;g__TK10-74A;s__	344	791240	0	1.72	100	0	26.65	20	25.32
S4_304	<50% completeness AND/OR >10% contamination	corals/sponges	d__Bacteria;p__Chloroflexota;c__Dehalococcoidia;o__Bin125;f__Bin125;g__TK10-74A;s__	506	1119390	0	3.45	100	0	20.45	20	20.36
S9_410	<50% completeness AND/OR >10% contamination	corals/sponges	d__Bacteria;p__Chloroflexota;c__Dehalococcoidia;o__Bin125;f__Bin125;g__TK10-74A;s__	196	493950	0	0	0	0	28.46	10	24.768
M30_46	<50% completeness AND/OR >10% contamination	marine	d__Bacteria;p__Chloroflexota;c__Dehalococcoidia;o__Dehalococcoidales;f__;g__;s__	893	1858160	0	9.72	23.08	7.47662	35.22	60	40.176
M42_91	<50% completeness AND/OR >10% contamination	marine	d__Bacteria;p__Chloroflexota;c__Dehalococcoidia;o__Dehalococcoidales;f__;g__;s__	303	761970	1.60111	7.01	22.22	5.45238	58.88	10	49.104
M46_136	<50% completeness AND/OR >10% contamination	marine	d__Bacteria;p__Chloroflexota;c__Dehalococcoidia;o__Dehalococcoidales;f__;g__;s__	809	2122690	0.582751	6.03	0	6.03	39.55	80	47.64
M9_310	<50% completeness AND/OR >10% contamination	marine	d__Bacteria;p__Chloroflexota;c__Dehalococcoidia;o__Dehalococcoidales;f__;g__;s__	1117	2024610	0	12.46	4.55	11.8931	21.71	70	31.368
R71_191	<50% completeness AND/OR >10% contamination	bioreactor	d__Bacteria;p__Chloroflexota;c__Dehalococcoidia;o__Dehalococcoidales;f__;g__;s__	157	599490	0	0.31	0	0.31	49.11	30	45.288
W60_167	<50% completeness AND/OR >10% contamination	water	d__Bacteria;p__Chloroflexota;c__Dehalococcoidia;o__Dehalococcoidales;f__;g__;s__	148	622540	2.8705	12.85	0	12.85	64.66	20	55.728
W79_250	<50% completeness AND/OR >10% contamination	water	d__Bacteria;p__Chloroflexota;c__Dehalococcoidia;o__Dehalococcoidales;f__;g__;s__	561	1286710	0	1.72	0	1.72	21.11	30	22.888
M22_31	<50% completeness AND/OR >10% contamination	marine	d__Bacteria;p__Chloroflexota;c__Dehalococcoidia;o__Dehalococcoidales;f__ARS1013;g__;s__	563	1446220	0	10.11	0	10.11	27.77	45	31.216
M43_119	<50% completeness AND/OR >10% contamination	marine	d__Bacteria;p__Chloroflexota;c__Dehalococcoidia;o__Dehalococcoidales;f__ARS1013;g__;s__	743	1838210	0	3.92	16.67	3.26654	15.99	65	25.792
M54_203	<50% completeness AND/OR >10% contamination	marine	d__Bacteria;p__Chloroflexota;c__Dehalococcoidia;o__Dehalococcoidales;f__ARS1013;g__;s__	257	760430	3.00488	10.5	0	10.5	56.14	15	47.912
M62_279	<50% completeness AND/OR >10% contamination	marine	d__Bacteria;p__Chloroflexota;c__Dehalococcoidia;o__Dehalococcoidales;f__ARS1013;g__;s__	299	654550	1.55221	14.01	16.28	11.7292	50.29	30	46.232
M9_336	<50% completeness AND/OR >10% contamination	marine	d__Bacteria;p__Chloroflexota;c__Dehalococcoidia;o__Dehalococcoidales;f__ARS1013;g__;s__	134	382240	3.19433	0.66	100	0	47.34	0	37.872
N2_92	<50% completeness AND/OR >10% contamination	high salt	d__Bacteria;p__Chloroflexota;c__Dehalococcoidia;o__Dehalococcoidales;f__ARS1013;g__;s__	306	650240	1.84086	7.13	21.43	5.60204	50.38	25	45.304
W31_60	<50% completeness AND/OR >10% contamination	water	d__Bacteria;p__Chloroflexota;c__Dehalococcoidia;o__Dehalococcoidales;f__ARS1013;g__;s__	140	290410	0.59571	5.17	0	5.17	26.18	0	20.944
W61_197	<50% completeness AND/OR >10% contamination	water	d__Bacteria;p__Chloroflexota;c__Dehalococcoidia;o__Dehalococcoidales;f__ARS1013;g__;s__	103	395380	0	7.45	0	7.45	43.18	30	40.544
W6_130	<50% completeness AND/OR >10% contamination	water	d__Bacteria;p__Chloroflexota;c__Dehalococcoidia;o__Dehalococcoidales;f__ARS1013;g__ARS1013;s__	569	1826070	0.733816	12.92	16.67	10.7662	63.17	35	57.536
M8_304	<50% completeness AND/OR >10% contamination	marine	d__Bacteria;p__Chloroflexota;c__Dehalococcoidia;o__Dehalococcoidales;f__Dehalococcoidaceae;g__;s__	94	197370	0.785327	0	0	0	29.22	5	24.376
W66_222	<50% completeness AND/OR >10% contamination	water	d__Bacteria;p__Chloroflexota;c__Dehalococcoidia;o__Dehalococcoidales;f__Dehalococcoidaceae;g__;s__	307	657160	0	1.72	0	1.72	25.77	10	22.616
R73_198	<50% completeness AND/OR >10% contamination	bioreactor	d__Bacteria;p__Chloroflexota;c__Dehalococcoidia;o__Dehalococcoidales;f__Dehalococcoidaceae;g__Dehalococcoides;s__Dehalococcoides mccartyi_A	281	1077820	0.613275	1.72	100	0	46.94	0	37.552
R29_108	<50% completeness AND/OR >10% contamination	bioreactor	d__Bacteria;p__Chloroflexota;c__Dehalococcoidia;o__Dehalococcoidales;f__Dehalococcoidaceae;g__Dehalococcoides;s__Dehalococcoides mccartyi_B	231	682200	0	1.72	100	0	38.09	0	30.472
R73_199	<50% completeness AND/OR >10% contamination	bioreactor	d__Bacteria;p__Chloroflexota;c__Dehalococcoidia;o__Dehalococcoidales;f__Dehalococcoidaceae;g__Dehalococcoides;s__Dehalococcoides mccartyi_B	268	984440	0	0	0	0	41.77	0	33.416
W53_107	<50% completeness AND/OR >10% contamination	water	d__Bacteria;p__Chloroflexota;c__Dehalococcoidia;o__Dehalococcoidales;f__Dehalococcoidaceae;g__Dehalogenimonas;s__	337	723960	0.250014	4.31	0	4.31	39.75	5	32.8
H21_276	<50% completeness AND/OR >10% contamination	hotsprings	d__Bacteria;p__Chloroflexota;c__Dehalococcoidia;o__Dehalococcoidales;f__E44-bin88;g__;s__	448	1028940	0.510234	13.48	50	6.74	47.82	40	46.256
M43_113	<50% completeness AND/OR >10% contamination	marine	d__Bacteria;p__Chloroflexota;c__Dehalococcoidia;o__Dehalococcoidales;f__E44-bin88;g__;s__	178	428440	3.55709	2.98	66.67	0.993234	20.35	0	16.28
M46_134	<50% completeness AND/OR >10% contamination	marine	d__Bacteria;p__Chloroflexota;c__Dehalococcoidia;o__Dehalococcoidales;f__E44-bin88;g__;s__	172	519140	0.895712	9.25	9.52	8.3694	48.9	35	46.12
M54_194	<50% completeness AND/OR >10% contamination	marine	d__Bacteria;p__Chloroflexota;c__Dehalococcoidia;o__Dehalococcoidales;f__E44-bin88;g__;s__	246	621810	0.92472	0	0	0	22.81	20	22.248
M54_199	<50% completeness AND/OR >10% contamination	marine	d__Bacteria;p__Chloroflexota;c__Dehalococcoidia;o__Dehalococcoidales;f__E44-bin88;g__;s__	252	638560	0.546542	15.44	14.29	13.2336	52.82	25	47.256
M62_271	<50% completeness AND/OR >10% contamination	marine	d__Bacteria;p__Chloroflexota;c__Dehalococcoidia;o__Dehalococcoidales;f__E44-bin88;g__;s__	166	420940	1.44439	5.49	100	0	31.27	10	27.016
M7_293	<50% completeness AND/OR >10% contamination	marine	d__Bacteria;p__Chloroflexota;c__Dehalococcoidia;o__Dehalococcoidales;f__E44-bin88;g__;s__	320	878360	1.51988	17.23	25	12.9225	41.36	35	40.088
N11_1	<50% completeness AND/OR >10% contamination	high salt	d__Bacteria;p__Chloroflexota;c__Dehalococcoidia;o__Dehalococcoidales;f__E44-bin88;g__;s__	1951	4037680	0	6.03	0	6.03	19.36	60	27.488
N11_8	<50% completeness AND/OR >10% contamination	high salt	d__Bacteria;p__Chloroflexota;c__Dehalococcoidia;o__Dehalococcoidales;f__E44-bin88;g__;s__	243	588830	5.81152	3.76	75	0.94	36.24	75	43.992
N7_308	<50% completeness AND/OR >10% contamination	high salt	d__Bacteria;p__Chloroflexota;c__Dehalococcoidia;o__Dehalococcoidales;f__E44-bin88;g__;s__	249	547410	1.8962	3.45	50	1.725	37.93	5	31.344
N8_370	<50% completeness AND/OR >10% contamination	high salt	d__Bacteria;p__Chloroflexota;c__Dehalococcoidia;o__Dehalococcoidales;f__E44-bin88;g__;s__	215	1291560	0	19.54	5	18.563	88.79	90	89.032
R24_93	<50% completeness AND/OR >10% contamination	bioreactor	d__Bacteria;p__Chloroflexota;c__Dehalococcoidia;o__Dehalococcoidales;f__E44-bin88;g__;s__	164	398940	0	1.38	0	1.38	27.35	15	24.88
W31_59	<50% completeness AND/OR >10% contamination	water	d__Bacteria;p__Chloroflexota;c__Dehalococcoidia;o__Dehalococcoidales;f__E44-bin88;g__;s__	182	362810	1.95419	2.04	0	2.04	25.62	10	22.496
W6_128	<50% completeness AND/OR >10% contamination	water	d__Bacteria;p__Chloroflexota;c__Dehalococcoidia;o__Dehalococcoidales;f__E44-bin88;g__;s__	213	678630	0.452382	0.16	0	0.16	40.6	20	36.48
W61_208	<50% completeness AND/OR >10% contamination	water	d__Bacteria;p__Chloroflexota;c__Dehalococcoidia;o__Dehalococcoidales;f__E44-bin88;g__;s__	172	569020	1.44635	12.77	16.67	10.6412	49.69	20	43.752
W7_229	<50% completeness AND/OR >10% contamination	water	d__Bacteria;p__Chloroflexota;c__Dehalococcoidia;o__Dehalococcoidales;f__E44-bin88;g__;s__	243	741030	3.64898	14.18	5.56	13.3916	79.23	50	73.384
M22_24	<50% completeness AND/OR >10% contamination	marine	d__Bacteria;p__Chloroflexota;c__Dehalococcoidia;o__Dehalococcoidales;f__E44-bin88;g__E44-bin88;s__	342	1112410	1.80958	14.14	20	11.312	79.6	40	71.68
M30_48	<50% completeness AND/OR >10% contamination	marine	d__Bacteria;p__Chloroflexota;c__Dehalococcoidia;o__Dehalococcoidales;f__E44-bin88;g__E44-bin88;s__	157	463750	1.01132	0.66	66.67	0.219978	50.13	5	41.104
M43_107	<50% completeness AND/OR >10% contamination	marine	d__Bacteria;p__Chloroflexota;c__Dehalococcoidia;o__Dehalococcoidales;f__E44-bin88;g__E44-bin88;s__	255	713260	1.83944	8.62	80	1.724	45.83	40	44.664
M46_133	<50% completeness AND/OR >10% contamination	marine	d__Bacteria;p__Chloroflexota;c__Dehalococcoidia;o__Dehalococcoidales;f__E44-bin88;g__E44-bin88;s__	213	516400	2.53486	0	0	0	53.25	20	46.6
M62_268	<50% completeness AND/OR >10% contamination	marine	d__Bacteria;p__Chloroflexota;c__Dehalococcoidia;o__Dehalococcoidales;f__E44-bin88;g__E44-bin88;s__	863	1970310	0.510072	17.55	33.33	11.7006	46.07	45	45.856
N11_3	<50% completeness AND/OR >10% contamination	high salt	d__Bacteria;p__Chloroflexota;c__Dehalococcoidia;o__Dehalococcoidales;f__E44-bin88;g__E44-bin88;s__	168	523790	4.46935	2.88	83.33	0.480096	32.85	15	29.28
N12_29	<50% completeness AND/OR >10% contamination	high salt	d__Bacteria;p__Chloroflexota;c__Dehalococcoidia;o__Dehalococcoidales;f__E44-bin88;g__E44-bin88;s__	137	568630	1.94503	19.89	95.45	0.904995	31.58	65	38.264
N12_33	<50% completeness AND/OR >10% contamination	high salt	d__Bacteria;p__Chloroflexota;c__Dehalococcoidia;o__Dehalococcoidales;f__E44-bin88;g__E44-bin88;s__	137	298600	0	0	0	0	25.56	5	21.448
N14_53	<50% completeness AND/OR >10% contamination	high salt	d__Bacteria;p__Chloroflexota;c__Dehalococcoidia;o__Dehalococcoidales;f__E44-bin88;g__E44-bin88;s__	92	545240	0.962879	19.25	84.62	2.96065	31.9	30	31.52
N14_62	<50% completeness AND/OR >10% contamination	high salt	d__Bacteria;p__Chloroflexota;c__Dehalococcoidia;o__Dehalococcoidales;f__E44-bin88;g__E44-bin88;s__	153	396460	1.16279	8.31	92.31	0.639039	30.17	20	28.136
N2_100	<50% completeness AND/OR >10% contamination	high salt	d__Bacteria;p__Chloroflexota;c__Dehalococcoidia;o__Dehalococcoidales;f__E44-bin88;g__E44-bin88;s__	286	880590	1.02318	10.5	0	10.5	47.96	35	45.368
N2_106	<50% completeness AND/OR >10% contamination	high salt	d__Bacteria;p__Chloroflexota;c__Dehalococcoidia;o__Dehalococcoidales;f__E44-bin88;g__E44-bin88;s__	80	549790	0	0	0	0	33.54	60	38.832
N2_90	<50% completeness AND/OR >10% contamination	high salt	d__Bacteria;p__Chloroflexota;c__Dehalococcoidia;o__Dehalococcoidales;f__E44-bin88;g__E44-bin88;s__	141	460660	2.09699	6.9	40	4.14	30.17	60	36.136
N2_99	<50% completeness AND/OR >10% contamination	high salt	d__Bacteria;p__Chloroflexota;c__Dehalococcoidia;o__Dehalococcoidales;f__E44-bin88;g__E44-bin88;s__	229	886850	1.31928	6.03	66.67	2.0098	45.64	50	46.512
N3_116	<50% completeness AND/OR >10% contamination	high salt	d__Bacteria;p__Chloroflexota;c__Dehalococcoidia;o__Dehalococcoidales;f__E44-bin88;g__E44-bin88;s__	268	744720	1.90004	12.54	75	3.135	45.27	35	43.216
N3_127	<50% completeness AND/OR >10% contamination	high salt	d__Bacteria;p__Chloroflexota;c__Dehalococcoidia;o__Dehalococcoidales;f__E44-bin88;g__E44-bin88;s__	109	259230	0	3.45	50	1.725	25.39	5	21.312
N3_136	<50% completeness AND/OR >10% contamination	high salt	d__Bacteria;p__Chloroflexota;c__Dehalococcoidia;o__Dehalococcoidales;f__E44-bin88;g__E44-bin88;s__	246	1270340	0.118079	8.62	0	8.62	36.83	50	39.464
N3_165	<50% completeness AND/OR >10% contamination	high salt	d__Bacteria;p__Chloroflexota;c__Dehalococcoidia;o__Dehalococcoidales;f__E44-bin88;g__E44-bin88;s__	220	629360	0	16.72	57.89	7.04079	55.8	25	49.64
N3_179	<50% completeness AND/OR >10% contamination	high salt	d__Bacteria;p__Chloroflexota;c__Dehalococcoidia;o__Dehalococcoidales;f__E44-bin88;g__E44-bin88;s__	103	309820	0	0.16	100	0	25.78	10	22.624
N4_196	<50% completeness AND/OR >10% contamination	high salt	d__Bacteria;p__Chloroflexota;c__Dehalococcoidia;o__Dehalococcoidales;f__E44-bin88;g__E44-bin88;s__	195	602640	0	11.91	70.27	3.54084	29.81	40	31.848
N4_198	<50% completeness AND/OR >10% contamination	high salt	d__Bacteria;p__Chloroflexota;c__Dehalococcoidia;o__Dehalococcoidales;f__E44-bin88;g__E44-bin88;s__	205	576710	0.847913	10.13	33.33	6.75367	39.97	60	43.976
N4_227	<50% completeness AND/OR >10% contamination	high salt	d__Bacteria;p__Chloroflexota;c__Dehalococcoidia;o__Dehalococcoidales;f__E44-bin88;g__E44-bin88;s__	62	255010	9.082	0	0	0	26.96	25	26.568
N4_235	<50% completeness AND/OR >10% contamination	high salt	d__Bacteria;p__Chloroflexota;c__Dehalococcoidia;o__Dehalococcoidales;f__E44-bin88;g__E44-bin88;s__	340	806320	0.721798	7.21	25	5.4075	40.71	20	36.568
N6_274	<50% completeness AND/OR >10% contamination	high salt	d__Bacteria;p__Chloroflexota;c__Dehalococcoidia;o__Dehalococcoidales;f__E44-bin88;g__E44-bin88;s__	264	821110	1.10338	17.12	33.33	11.4139	43.2	35	41.56
N6_291	<50% completeness AND/OR >10% contamination	high salt	d__Bacteria;p__Chloroflexota;c__Dehalococcoidia;o__Dehalococcoidales;f__E44-bin88;g__E44-bin88;s__	130	650160	2.50246	7.21	42.86	4.11979	28.76	40	31.008
N6_302	<50% completeness AND/OR >10% contamination	high salt	d__Bacteria;p__Chloroflexota;c__Dehalococcoidia;o__Dehalococcoidales;f__E44-bin88;g__E44-bin88;s__	61	350240	0	5.17	66.67	1.72316	25	55	31
N7_313	<50% completeness AND/OR >10% contamination	high salt	d__Bacteria;p__Chloroflexota;c__Dehalococcoidia;o__Dehalococcoidales;f__E44-bin88;g__E44-bin88;s__	129	348230	0	1.72	0	1.72	30.88	10	26.704
N7_323	<50% completeness AND/OR >10% contamination	high salt	d__Bacteria;p__Chloroflexota;c__Dehalococcoidia;o__Dehalococcoidales;f__E44-bin88;g__E44-bin88;s__	280	1104890	0	5.64	50	2.82	41.25	55	44
N8_350	<50% completeness AND/OR >10% contamination	high salt	d__Bacteria;p__Chloroflexota;c__Dehalococcoidia;o__Dehalococcoidales;f__E44-bin88;g__E44-bin88;s__	258	568490	1.52333	1.72	0	1.72	21.35	0	17.08
N8_351	<50% completeness AND/OR >10% contamination	high salt	d__Bacteria;p__Chloroflexota;c__Dehalococcoidia;o__Dehalococcoidales;f__E44-bin88;g__E44-bin88;s__	79	307040	0	0.16	100	0	30.58	20	28.464
N8_352	<50% completeness AND/OR >10% contamination	high salt	d__Bacteria;p__Chloroflexota;c__Dehalococcoidia;o__Dehalococcoidales;f__E44-bin88;g__E44-bin88;s__	93	284200	0.657987	8.97	37.5	5.60625	30.82	20	28.656
N8_354	<50% completeness AND/OR >10% contamination	high salt	d__Bacteria;p__Chloroflexota;c__Dehalococcoidia;o__Dehalococcoidales;f__E44-bin88;g__E44-bin88;s__	140	771850	2.86196	15.52	84.62	2.38698	43.26	55	45.608
N9_377	<50% completeness AND/OR >10% contamination	high salt	d__Bacteria;p__Chloroflexota;c__Dehalococcoidia;o__Dehalococcoidales;f__E44-bin88;g__E44-bin88;s__	374	910720	0.819132	9.64	75	2.41	40.52	40	40.416
N9_378	<50% completeness AND/OR >10% contamination	high salt	d__Bacteria;p__Chloroflexota;c__Dehalococcoidia;o__Dehalococcoidales;f__E44-bin88;g__E44-bin88;s__	310	631450	1.74994	10.82	0	10.82	35.96	10	30.768
N9_390	<50% completeness AND/OR >10% contamination	high salt	d__Bacteria;p__Chloroflexota;c__Dehalococcoidia;o__Dehalococcoidales;f__E44-bin88;g__E44-bin88;s__	260	700920	3.5753	0.63	100	0	35.19	40	36.152
N9_404	<50% completeness AND/OR >10% contamination	high salt	d__Bacteria;p__Chloroflexota;c__Dehalococcoidia;o__Dehalococcoidales;f__E44-bin88;g__E44-bin88;s__	159	445060	0	5.25	33.33	3.50018	36.33	20	33.064
N9_407	<50% completeness AND/OR >10% contamination	high salt	d__Bacteria;p__Chloroflexota;c__Dehalococcoidia;o__Dehalococcoidales;f__E44-bin88;g__E44-bin88;s__	220	732300	1.04602	1.72	0	1.72	52.9	25	47.32
W25_42	<50% completeness AND/OR >10% contamination	water	d__Bacteria;p__Chloroflexota;c__Dehalococcoidia;o__Dehalococcoidales;f__E44-bin88;g__E44-bin88;s__	419	897390	0.247384	9.62	22.22	7.48244	46.84	15	40.472
W44_93	<50% completeness AND/OR >10% contamination	water	d__Bacteria;p__Chloroflexota;c__Dehalococcoidia;o__Dehalococcoidales;f__E44-bin88;g__E44-bin88;s__	313	647170	1.40458	18.09	42.86	10.3366	47.25	5	38.8
W61_212	<50% completeness AND/OR >10% contamination	water	d__Bacteria;p__Chloroflexota;c__Dehalococcoidia;o__Dehalococcoidales;f__E44-bin88;g__E44-bin88;s__	165	661260	1.42909	6.9	25	5.175	41.97	50	43.576
W65_213	<50% completeness AND/OR >10% contamination	water	d__Bacteria;p__Chloroflexota;c__Dehalococcoidia;o__Dehalococcoidales;f__E44-bin88;g__E44-bin88;s__	172	563270	1.19303	5.75	12.5	5.03125	34.4	20	31.52
W65_217	<50% completeness AND/OR >10% contamination	water	d__Bacteria;p__Chloroflexota;c__Dehalococcoidia;o__Dehalococcoidales;f__E44-bin88;g__E44-bin88;s__	545	1614360	1.88682	9.64	11.11	8.569	55.41	25	49.328
W65_221	<50% completeness AND/OR >10% contamination	water	d__Bacteria;p__Chloroflexota;c__Dehalococcoidia;o__Dehalococcoidales;f__E44-bin88;g__E44-bin88;s__	294	813650	0	7.05	40	4.23	43.26	25	39.608
W92_273	<50% completeness AND/OR >10% contamination	water	d__Bacteria;p__Chloroflexota;c__Dehalococcoidia;o__Dehalococcoidales;f__E44-bin88;g__E44-bin88;s__	183	419450	1.99309	0	0	0	32.97	20	30.376
W92_277	<50% completeness AND/OR >10% contamination	water	d__Bacteria;p__Chloroflexota;c__Dehalococcoidia;o__Dehalococcoidales;f__E44-bin88;g__E44-bin88;s__	122	277080	1.36062	0.63	25	0.4725	29.78	15	26.824
M22_28	<50% completeness AND/OR >10% contamination	marine	d__Bacteria;p__Chloroflexota;c__Dehalococcoidia;o__Dehalococcoidales;f__Fen-1064;g__;s__	448	920860	0.81337	6.14	0	6.14	41	0	32.8
M43_118	<50% completeness AND/OR >10% contamination	marine	d__Bacteria;p__Chloroflexota;c__Dehalococcoidia;o__Dehalococcoidales;f__Fen-1064;g__;s__	446	1157350	0.993649	11.21	12.5	9.80875	33.23	25	31.584
M58_209	<50% completeness AND/OR >10% contamination	marine	d__Bacteria;p__Chloroflexota;c__Dehalococcoidia;o__Dehalococcoidales;f__Fen-1064;g__;s__	710	2213970	0	18.26	27.59	13.2221	74.94	15	62.952
M58_227	<50% completeness AND/OR >10% contamination	marine	d__Bacteria;p__Chloroflexota;c__Dehalococcoidia;o__Dehalococcoidales;f__Fen-1064;g__;s__	401	1181070	0.320049	15.44	88.24	1.81574	35.34	35	35.272
M62_265	<50% completeness AND/OR >10% contamination	marine	d__Bacteria;p__Chloroflexota;c__Dehalococcoidia;o__Dehalococcoidales;f__Fen-1064;g__;s__	298	620260	0	10.63	0	10.63	36.73	40	37.384
N2_79	<50% completeness AND/OR >10% contamination	high salt	d__Bacteria;p__Chloroflexota;c__Dehalococcoidia;o__Dehalococcoidales;f__Fen-1064;g__;s__	919	2.09239e+06	0	6.9	0	6.9	30.1	70	38.08
N3_124	<50% completeness AND/OR >10% contamination	high salt	d__Bacteria;p__Chloroflexota;c__Dehalococcoidia;o__Dehalococcoidales;f__Fen-1064;g__;s__	641	1570190	0	9.44	10	8.496	53.26	30	48.608
W60_168	<50% completeness AND/OR >10% contamination	water	d__Bacteria;p__Chloroflexota;c__Dehalococcoidia;o__Dehalococcoidales;f__Fen-1064;g__;s__	588	1187340	0	7.52	22.22	5.84906	29.23	40	31.384
W60_184	<50% completeness AND/OR >10% contamination	water	d__Bacteria;p__Chloroflexota;c__Dehalococcoidia;o__Dehalococcoidales;f__Fen-1064;g__;s__	296	860370	0.736892	1.72	100	0	39.11	35	38.288
M48_150	<50% completeness AND/OR >10% contamination	marine	d__Bacteria;p__Chloroflexota;c__Dehalococcoidia;o__Dehalococcoidales;f__Fen-1064;g__DUES01;s__	289	620940	0	1.72	100	0	24.48	5	20.584
M50_157	<50% completeness AND/OR >10% contamination	marine	d__Bacteria;p__Chloroflexota;c__Dehalococcoidia;o__Dehalococcoidales;f__Fen-1064;g__DUES01;s__	342	736460	0	0.86	0	0.86	29.19	15	26.352
H21_246	<50% completeness AND/OR >10% contamination	hotsprings	d__Bacteria;p__Chloroflexota;c__Dehalococcoidia;o__Dehalococcoidales;f__RBG-16-60-22;g__;s__	559	1162480	0	6.65	18.18	5.44103	42.99	25	39.392
M22_19	<50% completeness AND/OR >10% contamination	marine	d__Bacteria;p__Chloroflexota;c__Dehalococcoidia;o__Dehalococcoidales;f__RBG-16-60-22;g__;s__	381	735980	0	13.32	5	12.654	33.93	15	30.144
M30_58	<50% completeness AND/OR >10% contamination	marine	d__Bacteria;p__Chloroflexota;c__Dehalococcoidia;o__Dehalococcoidales;f__RBG-16-60-22;g__;s__	402	919480	0	8.61	22.73	6.65295	37.2	30	35.76
M30_59	<50% completeness AND/OR >10% contamination	marine	d__Bacteria;p__Chloroflexota;c__Dehalococcoidia;o__Dehalococcoidales;f__RBG-16-60-22;g__;s__	279	604990	0	12.85	13.33	11.1371	28.95	25	28.16
M42_89	<50% completeness AND/OR >10% contamination	marine	d__Bacteria;p__Chloroflexota;c__Dehalococcoidia;o__Dehalococcoidales;f__RBG-16-60-22;g__;s__	719	1494330	0.432301	4.08	28.57	2.91434	48.04	25	43.432
M43_127	<50% completeness AND/OR >10% contamination	marine	d__Bacteria;p__Chloroflexota;c__Dehalococcoidia;o__Dehalococcoidales;f__RBG-16-60-22;g__;s__	203	527870	0	1.72	50	0.86	25.94	5	21.752
M43_131	<50% completeness AND/OR >10% contamination	marine	d__Bacteria;p__Chloroflexota;c__Dehalococcoidia;o__Dehalococcoidales;f__RBG-16-60-22;g__;s__	526	1862430	0	18.42	26.32	13.5719	70.61	50	66.488
M58_237	<50% completeness AND/OR >10% contamination	marine	d__Bacteria;p__Chloroflexota;c__Dehalococcoidia;o__Dehalococcoidales;f__RBG-16-60-22;g__;s__	257	703280	0	1.72	0	1.72	36.32	30	35.056
M62_263	<50% completeness AND/OR >10% contamination	marine	d__Bacteria;p__Chloroflexota;c__Dehalococcoidia;o__Dehalococcoidales;f__RBG-16-60-22;g__;s__	330	785780	1.87839	11.19	9.09	10.1728	55.25	25	49.2
M62_284	<50% completeness AND/OR >10% contamination	marine	d__Bacteria;p__Chloroflexota;c__Dehalococcoidia;o__Dehalococcoidales;f__RBG-16-60-22;g__;s__	402	924980	0	2.59	0	2.59	25.11	25	25.088
M9_313	<50% completeness AND/OR >10% contamination	marine	d__Bacteria;p__Chloroflexota;c__Dehalococcoidia;o__Dehalococcoidales;f__RBG-16-60-22;g__;s__	325	935530	2.3313	17.97	20	14.376	80.02	30	70.016
N14_68	<50% completeness AND/OR >10% contamination	high salt	d__Bacteria;p__Chloroflexota;c__Dehalococcoidia;o__Dehalococcoidales;f__RBG-16-60-22;g__;s__	342	1178970	0	3.45	0	3.45	45.55	45	45.44
N2_104	<50% completeness AND/OR >10% contamination	high salt	d__Bacteria;p__Chloroflexota;c__Dehalococcoidia;o__Dehalococcoidales;f__RBG-16-60-22;g__;s__	398	1180360	0.221966	9.44	13.64	8.15238	44.6	35	42.68
N2_74	<50% completeness AND/OR >10% contamination	high salt	d__Bacteria;p__Chloroflexota;c__Dehalococcoidia;o__Dehalococcoidales;f__RBG-16-60-22;g__;s__	458	1178120	0	14.03	18.75	11.3994	50.14	55	51.112
N2_94	<50% completeness AND/OR >10% contamination	high salt	d__Bacteria;p__Chloroflexota;c__Dehalococcoidia;o__Dehalococcoidales;f__RBG-16-60-22;g__;s__	400	1161360	0	10.34	0	10.34	32.76	45	35.208
N3_134	<50% completeness AND/OR >10% contamination	high salt	d__Bacteria;p__Chloroflexota;c__Dehalococcoidia;o__Dehalococcoidales;f__RBG-16-60-22;g__;s__	508	1488960	1.28143	18.42	33.33	12.2806	56.66	70	59.328
N3_135	<50% completeness AND/OR >10% contamination	high salt	d__Bacteria;p__Chloroflexota;c__Dehalococcoidia;o__Dehalococcoidales;f__RBG-16-60-22;g__;s__	565	1550510	0	15.2	8.7	13.8776	52.46	35	48.968
N3_137	<50% completeness AND/OR >10% contamination	high salt	d__Bacteria;p__Chloroflexota;c__Dehalococcoidia;o__Dehalococcoidales;f__RBG-16-60-22;g__;s__	542	1396640	0	6.9	0	6.9	35.29	30	34.232
N3_139	<50% completeness AND/OR >10% contamination	high salt	d__Bacteria;p__Chloroflexota;c__Dehalococcoidia;o__Dehalococcoidales;f__RBG-16-60-22;g__;s__	223	656220	0	3.92	83.33	0.653464	33.02	10	28.416
N3_158	<50% completeness AND/OR >10% contamination	high salt	d__Bacteria;p__Chloroflexota;c__Dehalococcoidia;o__Dehalococcoidales;f__RBG-16-60-22;g__;s__	178	597880	4.5745	10.63	44.44	5.90603	30.93	20	28.744
N3_171	<50% completeness AND/OR >10% contamination	high salt	d__Bacteria;p__Chloroflexota;c__Dehalococcoidia;o__Dehalococcoidales;f__RBG-16-60-22;g__;s__	391	1160200	1.62989	12.54	45.45	6.84057	48.61	40	46.888
N3_172	<50% completeness AND/OR >10% contamination	high salt	d__Bacteria;p__Chloroflexota;c__Dehalococcoidia;o__Dehalococcoidales;f__RBG-16-60-22;g__;s__	200	484000	1.94008	6.11	25	4.5825	27.12	5	22.696
N3_176	<50% completeness AND/OR >10% contamination	high salt	d__Bacteria;p__Chloroflexota;c__Dehalococcoidia;o__Dehalococcoidales;f__RBG-16-60-22;g__;s__	395	1712660	3.05431	14.81	25	11.1075	88.71	45	79.968
N4_182	<50% completeness AND/OR >10% contamination	high salt	d__Bacteria;p__Chloroflexota;c__Dehalococcoidia;o__Dehalococcoidales;f__RBG-16-60-22;g__;s__	584	1284430	0	15.83	13.33	13.7199	51.25	35	48
N4_190	<50% completeness AND/OR >10% contamination	high salt	d__Bacteria;p__Chloroflexota;c__Dehalococcoidia;o__Dehalococcoidales;f__RBG-16-60-22;g__;s__	375	754540	0	7.63	14.29	6.53967	32.35	15	28.88
N4_218	<50% completeness AND/OR >10% contamination	high salt	d__Bacteria;p__Chloroflexota;c__Dehalococcoidia;o__Dehalococcoidales;f__RBG-16-60-22;g__;s__	640	2190130	0.868898	12.37	0	12.37	77.13	60	73.704
N6_294	<50% completeness AND/OR >10% contamination	high salt	d__Bacteria;p__Chloroflexota;c__Dehalococcoidia;o__Dehalococcoidales;f__RBG-16-60-22;g__;s__	617	1919070	0	13.1	9.09	11.9092	67.24	50	63.792
N7_306	<50% completeness AND/OR >10% contamination	high salt	d__Bacteria;p__Chloroflexota;c__Dehalococcoidia;o__Dehalococcoidales;f__RBG-16-60-22;g__;s__	595	1285960	0	3.45	0	3.45	31.61	55	36.288
N7_320	<50% completeness AND/OR >10% contamination	high salt	d__Bacteria;p__Chloroflexota;c__Dehalococcoidia;o__Dehalococcoidales;f__RBG-16-60-22;g__;s__	262	530710	0	8.62	0	8.62	29.73	15	26.784
N7_325	<50% completeness AND/OR >10% contamination	high salt	d__Bacteria;p__Chloroflexota;c__Dehalococcoidia;o__Dehalococcoidales;f__RBG-16-60-22;g__;s__	726	1651230	1.21667	10.34	0	10.34	44.44	45	44.552
N8_364	<50% completeness AND/OR >10% contamination	high salt	d__Bacteria;p__Chloroflexota;c__Dehalococcoidia;o__Dehalococcoidales;f__RBG-16-60-22;g__;s__	245	545780	0.593646	8.93	28.57	6.3787	30.09	0	24.072
N8_372	<50% completeness AND/OR >10% contamination	high salt	d__Bacteria;p__Chloroflexota;c__Dehalococcoidia;o__Dehalococcoidales;f__RBG-16-60-22;g__;s__	266	561580	0.363261	2.04	0	2.04	38.45	15	33.76
N8_376	<50% completeness AND/OR >10% contamination	high salt	d__Bacteria;p__Chloroflexota;c__Dehalococcoidia;o__Dehalococcoidales;f__RBG-16-60-22;g__;s__	326	1601270	2.84899	11.49	12.5	10.0538	57.26	70	59.808
N9_384	<50% completeness AND/OR >10% contamination	high salt	d__Bacteria;p__Chloroflexota;c__Dehalococcoidia;o__Dehalococcoidales;f__RBG-16-60-22;g__;s__	500	1002150	0	5.49	20	4.392	42.86	20	38.288
N9_386	<50% completeness AND/OR >10% contamination	high salt	d__Bacteria;p__Chloroflexota;c__Dehalococcoidia;o__Dehalococcoidales;f__RBG-16-60-22;g__;s__	173	1201900	2.3987	6.21	25	4.6575	40.13	55	43.104
N9_397	<50% completeness AND/OR >10% contamination	high salt	d__Bacteria;p__Chloroflexota;c__Dehalococcoidia;o__Dehalococcoidales;f__RBG-16-60-22;g__;s__	491	1328910	1.95122	12.32	16.67	10.2663	54.86	40	51.888
R24_91	<50% completeness AND/OR >10% contamination	bioreactor	d__Bacteria;p__Chloroflexota;c__Dehalococcoidia;o__Dehalococcoidales;f__RBG-16-60-22;g__;s__	352	783020	1.24262	3.45	0	3.45	33.98	35	34.184
W31_50	<50% completeness AND/OR >10% contamination	water	d__Bacteria;p__Chloroflexota;c__Dehalococcoidia;o__Dehalococcoidales;f__RBG-16-60-22;g__;s__	1486	3226590	0	0.86	0	0.86	29.87	45	32.896
W31_67	<50% completeness AND/OR >10% contamination	water	d__Bacteria;p__Chloroflexota;c__Dehalococcoidia;o__Dehalococcoidales;f__RBG-16-60-22;g__;s__	313	905960	0	5.17	0	5.17	48.59	30	44.872
W6_137	<50% completeness AND/OR >10% contamination	water	d__Bacteria;p__Chloroflexota;c__Dehalococcoidia;o__Dehalococcoidales;f__RBG-16-60-22;g__;s__	530	1418400	0	1.72	0	1.72	24.84	40	27.872
W6_141	<50% completeness AND/OR >10% contamination	water	d__Bacteria;p__Chloroflexota;c__Dehalococcoidia;o__Dehalococcoidales;f__RBG-16-60-22;g__;s__	176	482270	1.1197	1.72	0	1.72	23.59	15	21.872
W60_150	<50% completeness AND/OR >10% contamination	water	d__Bacteria;p__Chloroflexota;c__Dehalococcoidia;o__Dehalococcoidales;f__RBG-16-60-22;g__;s__	303	761680	0	6.32	20	5.056	38.01	45	39.408
W60_152	<50% completeness AND/OR >10% contamination	water	d__Bacteria;p__Chloroflexota;c__Dehalococcoidia;o__Dehalococcoidales;f__RBG-16-60-22;g__;s__	161	389460	0.397987	1.72	0	1.72	23.79	45	28.032
W61_188	<50% completeness AND/OR >10% contamination	water	d__Bacteria;p__Chloroflexota;c__Dehalococcoidia;o__Dehalococcoidales;f__RBG-16-60-22;g__;s__	479	1013220	1.4449	3.61	33.33	2.40679	38.87	25	36.096
W7_225	<50% completeness AND/OR >10% contamination	water	d__Bacteria;p__Chloroflexota;c__Dehalococcoidia;o__Dehalococcoidales;f__RBG-16-60-22;g__;s__	448	880750	0	4.76	12.5	4.165	37.42	15	32.936
W92_263	<50% completeness AND/OR >10% contamination	water	d__Bacteria;p__Chloroflexota;c__Dehalococcoidia;o__Dehalococcoidales;f__RBG-16-60-22;g__;s__	252	519490	0	0.16	100	0	25.71	10	22.568
W92_270	<50% completeness AND/OR >10% contamination	water	d__Bacteria;p__Chloroflexota;c__Dehalococcoidia;o__Dehalococcoidales;f__RBG-16-60-22;g__;s__	315	712880	0	0.94	33.33	0.626698	32.08	15	28.664
M22_36	<50% completeness AND/OR >10% contamination	marine	d__Bacteria;p__Chloroflexota;c__Dehalococcoidia;o__Dehalococcoidales;f__RBG-16-60-22;g__E44-bin89;s__	281	750970	0.789645	6.9	25	5.175	41.22	20	36.976
M35_73	<50% completeness AND/OR >10% contamination	marine	d__Bacteria;p__Chloroflexota;c__Dehalococcoidia;o__Dehalococcoidales;f__RBG-16-60-22;g__E44-bin89;s__	352	959170	0	1.72	0	1.72	47.55	15	41.04
M6_253	<50% completeness AND/OR >10% contamination	marine	d__Bacteria;p__Chloroflexota;c__Dehalococcoidia;o__Dehalococcoidales;f__RBG-16-60-22;g__E44-bin89;s__	298	629580	1.08644	0	0	0	25.6	25	25.48
M6_255	<50% completeness AND/OR >10% contamination	marine	d__Bacteria;p__Chloroflexota;c__Dehalococcoidia;o__Dehalococcoidales;f__RBG-16-60-22;g__E44-bin89;s__	184	388350	0.522724	0.47	0	0.47	31.35	0	25.08
M9_311	<50% completeness AND/OR >10% contamination	marine	d__Bacteria;p__Chloroflexota;c__Dehalococcoidia;o__Dehalococcoidales;f__RBG-16-60-22;g__E44-bin89;s__	358	725420	1.40608	10.66	25	7.995	36.68	40	37.344
M9_314	<50% completeness AND/OR >10% contamination	marine	d__Bacteria;p__Chloroflexota;c__Dehalococcoidia;o__Dehalococcoidales;f__RBG-16-60-22;g__E44-bin89;s__	175	638250	0.261653	0.16	0	0.16	27.24	5	22.792
W6_139	<50% completeness AND/OR >10% contamination	water	d__Bacteria;p__Chloroflexota;c__Dehalococcoidia;o__Dehalococcoidales;f__RBG-16-60-22;g__E44-bin89;s__E44-bin89 sp004375725	198	587390	0.905701	0	0	0	54.86	10	45.888
N13_41	<50% completeness AND/OR >10% contamination	high salt	d__Bacteria;p__Chloroflexota;c__Dehalococcoidia;o__Dehalococcoidales;f__RBG-16-60-22;g__Fen-1077;s__	327	883200	0	1.72	0	1.72	48.82	25	44.056
N3_138	<50% completeness AND/OR >10% contamination	high salt	d__Bacteria;p__Chloroflexota;c__Dehalococcoidia;o__Dehalococcoidales;f__RBG-16-60-22;g__Fen-1077;s__	162	787290	0	3.61	26.32	2.65985	38.79	25	36.032
N3_146	<50% completeness AND/OR >10% contamination	high salt	d__Bacteria;p__Chloroflexota;c__Dehalococcoidia;o__Dehalococcoidales;f__RBG-16-60-22;g__Fen-1077;s__	338	1816420	0	15.13	7.69	13.9665	65.83	60	64.664
N4_232	<50% completeness AND/OR >10% contamination	high salt	d__Bacteria;p__Chloroflexota;c__Dehalococcoidia;o__Dehalococcoidales;f__RBG-16-60-22;g__Fen-1077;s__	454	1148960	0.751114	10.63	15.38	8.99511	48.67	20	42.936
W31_58	<50% completeness AND/OR >10% contamination	water	d__Bacteria;p__Chloroflexota;c__Dehalococcoidia;o__Dehalococcoidales;f__RBG-16-60-22;g__Fen-1077;s__	577	1257400	1.94528	12.07	34.62	7.89137	43.2	15	37.56
W61_201	<50% completeness AND/OR >10% contamination	water	d__Bacteria;p__Chloroflexota;c__Dehalococcoidia;o__Dehalococcoidales;f__RBG-16-60-22;g__JdFR-56;s__	135	628900	0	4.78	83.33	0.796826	48.98	30	45.184
N3_153	<50% completeness AND/OR >10% contamination	high salt	d__Bacteria;p__Chloroflexota;c__Dehalococcoidia;o__Dehalococcoidales;f__RBG-16-60-22;g__RBG-13-51-18;s__	388	1661500	0	19.75	0	19.75	75.47	70	74.376
N6_301	<50% completeness AND/OR >10% contamination	high salt	d__Bacteria;p__Chloroflexota;c__Dehalococcoidia;o__Dehalococcoidales;f__RBG-16-60-22;g__RBG-13-51-18;s__	185	531090	0	1.02	0	1.02	42.63	25	39.104
W73_231	<50% completeness AND/OR >10% contamination	water	d__Bacteria;p__Chloroflexota;c__Dehalococcoidia;o__Dehalococcoidales;f__RBG-16-60-22;g__RBG-13-51-18;s__	658	1403040	0	18.01	31.82	12.2792	65.49	40	60.392
M43_110	<50% completeness AND/OR >10% contamination	marine	d__Bacteria;p__Chloroflexota;c__Dehalococcoidia;o__Dehalococcoidales;f__RBG-16-60-22;g__RBG-16-56-11;s__	583	1354890	0	12.57	19.05	10.1754	35.71	50	38.568
N4_211	<50% completeness AND/OR >10% contamination	high salt	d__Bacteria;p__Chloroflexota;c__Dehalococcoidia;o__Dehalococcoidales;f__RBG-16-60-22;g__RBG-16-56-11;s__	229	654390	0	8.62	0	8.62	39.72	15	34.776
N3_160	<50% completeness AND/OR >10% contamination	high salt	d__Bacteria;p__Chloroflexota;c__Dehalococcoidia;o__Dehalococcoidales;f__RBG-16-60-22;g__RBG-16-60-22;s__	160	526640	1.57603	0	0	0	30.85	15	27.68
M22_26	<50% completeness AND/OR >10% contamination	marine	d__Bacteria;p__Chloroflexota;c__Dehalococcoidia;o__Dehalococcoidales;f__RBG-16-60-22;g__W425;s__	146	850420	0	9.56	23.08	7.35355	50.86	20	44.688
M22_29	<50% completeness AND/OR >10% contamination	marine	d__Bacteria;p__Chloroflexota;c__Dehalococcoidia;o__Dehalococcoidales;f__RBG-16-60-22;g__W425;s__	544	1112970	0	5.64	42.86	3.2227	27.52	5	23.016
N2_97	<50% completeness AND/OR >10% contamination	high salt	d__Bacteria;p__Chloroflexota;c__Dehalococcoidia;o__Dehalococcoidales;f__RBG-16-60-22;g__W425;s__	402	1519120	0.545711	1.72	0	1.72	47.41	50	47.928
N3_122	<50% completeness AND/OR >10% contamination	high salt	d__Bacteria;p__Chloroflexota;c__Dehalococcoidia;o__Dehalococcoidales;f__RBG-16-60-22;g__W425;s__	357	911720	0	1.72	0	1.72	35.41	30	34.328
N4_205	<50% completeness AND/OR >10% contamination	high salt	d__Bacteria;p__Chloroflexota;c__Dehalococcoidia;o__Dehalococcoidales;f__RBG-16-60-22;g__W425;s__	88	438350	0	1.72	0	1.72	32.37	20	29.896
N5_248	<50% completeness AND/OR >10% contamination	high salt	d__Bacteria;p__Chloroflexota;c__Dehalococcoidia;o__Dehalococcoidales;f__RBG-16-60-22;g__W425;s__	369	982820	0	9.94	18.18	8.13291	45.14	10	38.112
N7_329	<50% completeness AND/OR >10% contamination	high salt	d__Bacteria;p__Chloroflexota;c__Dehalococcoidia;o__Dehalococcoidales;f__RBG-16-60-22;g__W425;s__	593	2362030	1.67906	12.93	0	12.93	70.87	45	65.696
N9_402	<50% completeness AND/OR >10% contamination	high salt	d__Bacteria;p__Chloroflexota;c__Dehalococcoidia;o__Dehalococcoidales;f__RBG-16-60-22;g__W425;s__	763	2677090	0	11.65	11.11	10.3557	65.75	75	67.6
W31_57	<50% completeness AND/OR >10% contamination	water	d__Bacteria;p__Chloroflexota;c__Dehalococcoidia;o__Dehalococcoidales;f__RBG-16-60-22;g__W425;s__	466	1196650	0	3.45	66.67	1.14988	28.76	40	31.008
W31_66	<50% completeness AND/OR >10% contamination	water	d__Bacteria;p__Chloroflexota;c__Dehalococcoidia;o__Dehalococcoidales;f__RBG-16-60-22;g__W425;s__	455	3496590	0	19.25	21.43	15.1247	86.76	95	88.408
W92_268	<50% completeness AND/OR >10% contamination	water	d__Bacteria;p__Chloroflexota;c__Dehalococcoidia;o__Dehalococcoidales;f__RBG-16-60-22;g__W425;s__	155	474660	0	7.13	27.27	5.18565	39.34	5	32.472
N13_34	<50% completeness AND/OR >10% contamination	high salt	d__Bacteria;p__Chloroflexota;c__Dehalococcoidia;o__Dehalococcoidales;f__SOJS01;g__;s__	247	575770	2.7181	13.43	45.45	7.32606	26.36	10	23.088
N3_129	<50% completeness AND/OR >10% contamination	high salt	d__Bacteria;p__Chloroflexota;c__Dehalococcoidia;o__Dehalococcoidales;f__SOJS01;g__;s__	351	934580	0.21079	14.34	12.82	12.5016	65.08	50	62.064
W60_160	<50% completeness AND/OR >10% contamination	water	d__Bacteria;p__Chloroflexota;c__Dehalococcoidia;o__Dehalococcoidales;f__SOJS01;g__;s__	425	983230	0.419027	6.66	0	6.66	35.82	30	34.656
M28_43	<50% completeness AND/OR >10% contamination	marine	d__Bacteria;p__Chloroflexota;c__Dehalococcoidia;o__Dehalococcoidales;f__SOJS01;g__SOJS01;s__	283	639510	1.05237	0	0	0	20.85	25	21.68
W6_129	<50% completeness AND/OR >10% contamination	water	d__Bacteria;p__Chloroflexota;c__Dehalococcoidia;o__Dehalococcoidales;f__SOJS01;g__SOJS01;s__	359	1501900	0.661828	0	0	0	44.25	30	41.4
M22_20	<50% completeness AND/OR >10% contamination	marine	d__Bacteria;p__Chloroflexota;c__Dehalococcoidia;o__Dehalococcoidales;f__SURF-40;g__;s__	1948	3648230	0	1.72	0	1.72	26.32	20	25.056
W76_245	<50% completeness AND/OR >10% contamination	water	d__Bacteria;p__Chloroflexota;c__Dehalococcoidia;o__Dehalococcoidales;f__SURF-40;g__SURF-40;s__	226	527550	0	0	0	0	38.17	15	33.536
W39_83	<50% completeness AND/OR >10% contamination	water	d__Bacteria;p__Chloroflexota;c__Dehalococcoidia;o__Dehalococcoidales;f__UBA1222;g__SURF-27;s__	270	717350	0	2.35	0	2.35	47.44	30	43.952
M30_53	<50% completeness AND/OR >10% contamination	marine	d__Bacteria;p__Chloroflexota;c__Dehalococcoidia;o__Dehalococcoidales;f__UBA2162;g__;s__	252	570610	0	8.15	25	6.1125	29.23	35	30.384
M42_90	<50% completeness AND/OR >10% contamination	marine	d__Bacteria;p__Chloroflexota;c__Dehalococcoidia;o__Dehalococcoidales;f__UBA2162;g__;s__	3369	9726280	0	6.19	0	6.19	18.5	100	34.8
M43_112	<50% completeness AND/OR >10% contamination	marine	d__Bacteria;p__Chloroflexota;c__Dehalococcoidia;o__Dehalococcoidales;f__UBA2162;g__;s__	200	476040	0.846568	2.35	0	2.35	30.8	25	29.64
M43_123	<50% completeness AND/OR >10% contamination	marine	d__Bacteria;p__Chloroflexota;c__Dehalococcoidia;o__Dehalococcoidales;f__UBA2162;g__;s__	211	698650	2.20998	2.82	0	2.82	38.48	30	36.784
M43_126	<50% completeness AND/OR >10% contamination	marine	d__Bacteria;p__Chloroflexota;c__Dehalococcoidia;o__Dehalococcoidales;f__UBA2162;g__;s__	409	1852950	1.29307	3.45	50	1.725	42.88	55	45.304
M54_202	<50% completeness AND/OR >10% contamination	marine	d__Bacteria;p__Chloroflexota;c__Dehalococcoidia;o__Dehalococcoidales;f__UBA2162;g__;s__	627	1943970	0.33231	17.32	38.46	10.6587	39.5	35	38.6
N3_125	<50% completeness AND/OR >10% contamination	high salt	d__Bacteria;p__Chloroflexota;c__Dehalococcoidia;o__Dehalococcoidales;f__UBA2162;g__;s__	340	934310	0	5.17	0	5.17	27.74	35	29.192
N4_228	<50% completeness AND/OR >10% contamination	high salt	d__Bacteria;p__Chloroflexota;c__Dehalococcoidia;o__Dehalococcoidales;f__UBA2162;g__;s__	135	377310	0	0	0	0	25.41	10	22.328
N8_373	<50% completeness AND/OR >10% contamination	high salt	d__Bacteria;p__Chloroflexota;c__Dehalococcoidia;o__Dehalococcoidales;f__UBA2162;g__;s__	602	1650250	0	14.71	13.33	12.7492	57.26	45	54.808
W73_234	<50% completeness AND/OR >10% contamination	water	d__Bacteria;p__Chloroflexota;c__Dehalococcoidia;o__Dehalococcoidales;f__UBA2162;g__;s__	309	655680	0	0	0	0	29.47	30	29.576
W92_267	<50% completeness AND/OR >10% contamination	water	d__Bacteria;p__Chloroflexota;c__Dehalococcoidia;o__Dehalococcoidales;f__UBA2162;g__;s__	318	930550	1.78282	0	0	0	37.23	25	34.784
N2_105	<50% completeness AND/OR >10% contamination	high salt	d__Bacteria;p__Chloroflexota;c__Dehalococcoidia;o__Dehalococcoidales;f__UBA2162;g__GCA-2685815;s__	120	419750	0	0.16	0	0.16	35.32	20	32.256
N12_26	<50% completeness AND/OR >10% contamination	high salt	d__Bacteria;p__Chloroflexota;c__Dehalococcoidia;o__Dehalococcoidales;f__UBA2162;g__MGML01;s__	387	951320	0	0	0	0	25.71	15	23.568
R24_94	<50% completeness AND/OR >10% contamination	bioreactor	d__Bacteria;p__Chloroflexota;c__Dehalococcoidia;o__Dehalococcoidales;f__UBA3254;g__;s__	348	745510	0	1.72	0	1.72	20.61	20	20.488
R24_99	<50% completeness AND/OR >10% contamination	bioreactor	d__Bacteria;p__Chloroflexota;c__Dehalococcoidia;o__Dehalococcoidales;f__UBA3254;g__;s__	125	528900	0	1.72	0	1.72	23.03	15	21.424
W66_223	<50% completeness AND/OR >10% contamination	water	d__Bacteria;p__Chloroflexota;c__Dehalococcoidia;o__Dehalococcoidales;f__UBA3254;g__;s__	496	1496050	1.27736	1.72	0	1.72	56.11	20	48.888
R24_79	<50% completeness AND/OR >10% contamination	bioreactor	d__Bacteria;p__Chloroflexota;c__Dehalococcoidia;o__Dehalococcoidales;f__UBA3254;g__UBA3254;s__	36	370890	1.59077	0	0	0	20.69	45	25.552
R24_84	<50% completeness AND/OR >10% contamination	bioreactor	d__Bacteria;p__Chloroflexota;c__Dehalococcoidia;o__Dehalococcoidales;f__UBA3254;g__UBA3254;s__	532	1278820	0.629487	1	50	0.5	31.56	30	31.248
R71_185	<50% completeness AND/OR >10% contamination	bioreactor	d__Bacteria;p__Chloroflexota;c__Dehalococcoidia;o__Dehalococcoidales;f__UBA3254;g__UBA3254;s__	420	1142110	0	3.47	0	3.47	32.76	15	29.208
H105_26	<50% completeness AND/OR >10% contamination	hotsprings	d__Bacteria;p__Chloroflexota;c__Dehalococcoidia;o__Dehalococcoidales;f__UBA3254;g__UBA3254;s__UBA3254 sp011328975	341	1.04833e+06	1.55485	0.16	0	0.16	51.27	10	43.016
M42_96	<50% completeness AND/OR >10% contamination	marine	d__Bacteria;p__Chloroflexota;c__Dehalococcoidia;o__Dehalococcoidales;f__UBA5627;g__;s__	142	388880	4.32267	5.17	0	5.17	39.2	5	32.36
M51_168	<50% completeness AND/OR >10% contamination	marine	d__Bacteria;p__Chloroflexota;c__Dehalococcoidia;o__Dehalococcoidales;f__UBA5627;g__;s__	76	616560	0	12.62	33.33	8.41375	55.17	25	49.136
M58_207	<50% completeness AND/OR >10% contamination	marine	d__Bacteria;p__Chloroflexota;c__Dehalococcoidia;o__Dehalococcoidales;f__UBA5627;g__;s__	296	610680	1.80946	3.21	0	3.21	43.8	15	38.04
N3_131	<50% completeness AND/OR >10% contamination	high salt	d__Bacteria;p__Chloroflexota;c__Dehalococcoidia;o__Dehalococcoidales;f__UBA5627;g__;s__	196	470740	2.41959	7.37	5.56	6.96023	46.53	10	39.224
R44_129	<50% completeness AND/OR >10% contamination	bioreactor	d__Bacteria;p__Chloroflexota;c__Dehalococcoidia;o__Dehalococcoidales;f__UBA5627;g__;s__	229	497560	1.85304	4.31	33.33	2.87348	28.45	5	23.76
M22_27	<50% completeness AND/OR >10% contamination	marine	d__Bacteria;p__Chloroflexota;c__Dehalococcoidia;o__Dehalococcoidales;f__UBA5627;g__W693;s__	157	323650	1.37803	0	0	0	18.38	0	14.704
M22_32	<50% completeness AND/OR >10% contamination	marine	d__Bacteria;p__Chloroflexota;c__Dehalococcoidia;o__Dehalococcoidales;f__UBA5627;g__W693;s__	126	398320	2.32476	1.72	100	0	46.33	10	39.064
M30_60	<50% completeness AND/OR >10% contamination	marine	d__Bacteria;p__Chloroflexota;c__Dehalococcoidia;o__Dehalococcoidales;f__UBA5760;g__;s__	267	1780130	2.11501	14.55	7.14	13.5111	88.79	85	88.032
M42_93	<50% completeness AND/OR >10% contamination	marine	d__Bacteria;p__Chloroflexota;c__Dehalococcoidia;o__Dehalococcoidales;f__UBA5760;g__;s__	159	599110	0	5.17	66.67	1.72316	30.25	15	27.2
M42_94	<50% completeness AND/OR >10% contamination	marine	d__Bacteria;p__Chloroflexota;c__Dehalococcoidia;o__Dehalococcoidales;f__UBA5760;g__;s__	283	800180	3.49296	14.99	58.82	6.17288	45.2	45	45.16
M46_135	<50% completeness AND/OR >10% contamination	marine	d__Bacteria;p__Chloroflexota;c__Dehalococcoidia;o__Dehalococcoidales;f__UBA5760;g__;s__	176	378320	1.74984	8.93	0	8.93	39.07	35	38.256
M54_204	<50% completeness AND/OR >10% contamination	marine	d__Bacteria;p__Chloroflexota;c__Dehalococcoidia;o__Dehalococcoidales;f__UBA5760;g__;s__	125	326620	3.19637	2.19	25	1.6425	28.86	5	24.088
M54_206	<50% completeness AND/OR >10% contamination	marine	d__Bacteria;p__Chloroflexota;c__Dehalococcoidia;o__Dehalococcoidales;f__UBA5760;g__;s__	82	192450	0	0	0	0	29.69	5	24.752
M58_220	<50% completeness AND/OR >10% contamination	marine	d__Bacteria;p__Chloroflexota;c__Dehalococcoidia;o__Dehalococcoidales;f__UBA5760;g__;s__	178	602990	3.6518	8.93	0	8.93	45.92	40	44.736
M62_273	<50% completeness AND/OR >10% contamination	marine	d__Bacteria;p__Chloroflexota;c__Dehalococcoidia;o__Dehalococcoidales;f__UBA5760;g__;s__	304	663640	0.776023	9.72	21.43	7.637	37.54	25	35.032
M62_276	<50% completeness AND/OR >10% contamination	marine	d__Bacteria;p__Chloroflexota;c__Dehalococcoidia;o__Dehalococcoidales;f__UBA5760;g__;s__	298	642750	0	6.66	25	4.995	28.38	20	26.704
M7_296	<50% completeness AND/OR >10% contamination	marine	d__Bacteria;p__Chloroflexota;c__Dehalococcoidia;o__Dehalococcoidales;f__UBA5760;g__;s__	237	605110	0	12.07	8.33	11.0646	38.09	55	41.472
N3_152	<50% completeness AND/OR >10% contamination	high salt	d__Bacteria;p__Chloroflexota;c__Dehalococcoidia;o__Dehalococcoidales;f__UBA5760;g__;s__	168	493040	0	1.72	0	1.72	40.19	25	37.152
N3_161	<50% completeness AND/OR >10% contamination	high salt	d__Bacteria;p__Chloroflexota;c__Dehalococcoidia;o__Dehalococcoidales;f__UBA5760;g__;s__	97	618610	1.21078	8.7	0	8.7	25.39	30	26.312
N8_359	<50% completeness AND/OR >10% contamination	high salt	d__Bacteria;p__Chloroflexota;c__Dehalococcoidia;o__Dehalococcoidales;f__UBA5760;g__;s__	150	338960	0	5.25	10	4.725	27.2	0	21.76
W31_76	<50% completeness AND/OR >10% contamination	water	d__Bacteria;p__Chloroflexota;c__Dehalococcoidia;o__Dehalococcoidales;f__UBA5760;g__;s__	229	643060	1.06833	10.42	7.14	9.67601	40.82	45	41.656
W6_136	<50% completeness AND/OR >10% contamination	water	d__Bacteria;p__Chloroflexota;c__Dehalococcoidia;o__Dehalococcoidales;f__UBA5760;g__;s__	293	678470	2.28603	12.07	9.09	10.9728	43.59	10	36.872
W6_140	<50% completeness AND/OR >10% contamination	water	d__Bacteria;p__Chloroflexota;c__Dehalococcoidia;o__Dehalococcoidales;f__UBA5760;g__;s__	751	2137790	0.478532	11.44	19.23	9.24009	41.61	40	41.288
W60_147	<50% completeness AND/OR >10% contamination	water	d__Bacteria;p__Chloroflexota;c__Dehalococcoidia;o__Dehalococcoidales;f__UBA5760;g__;s__	177	458130	2.32903	4.45	14.29	3.8141	57.41	15	48.928
W60_149	<50% completeness AND/OR >10% contamination	water	d__Bacteria;p__Chloroflexota;c__Dehalococcoidia;o__Dehalococcoidales;f__UBA5760;g__;s__	180	415720	2.25633	7.7	9.09	7.00007	43.86	10	37.088
W60_151	<50% completeness AND/OR >10% contamination	water	d__Bacteria;p__Chloroflexota;c__Dehalococcoidia;o__Dehalococcoidales;f__UBA5760;g__;s__	186	477620	1.97856	14.62	11.54	12.9329	48.2	25	43.56
W61_191	<50% completeness AND/OR >10% contamination	water	d__Bacteria;p__Chloroflexota;c__Dehalococcoidia;o__Dehalococcoidales;f__UBA5760;g__;s__	173	350440	1.57231	0.63	50	0.315	39.18	5	32.344
W61_192	<50% completeness AND/OR >10% contamination	water	d__Bacteria;p__Chloroflexota;c__Dehalococcoidia;o__Dehalococcoidales;f__UBA5760;g__;s__	147	383540	0	18.97	0	18.97	38.58	25	35.864
W61_206	<50% completeness AND/OR >10% contamination	water	d__Bacteria;p__Chloroflexota;c__Dehalococcoidia;o__Dehalococcoidales;f__UBA5760;g__;s__	85	255690	2.94497	2.98	21.43	2.34139	29.91	5	24.928
W92_272	<50% completeness AND/OR >10% contamination	water	d__Bacteria;p__Chloroflexota;c__Dehalococcoidia;o__Dehalococcoidales;f__UBA5760;g__;s__	726	2260590	0.455191	5.8	12.5	5.075	31.36	75	40.088
N7_315	<50% completeness AND/OR >10% contamination	high salt	d__Bacteria;p__Chloroflexota;c__Dehalococcoidia;o__Dehalococcoidales;f__UBA5760;g__DUEB01;s__	305	847450	0	12.62	18.75	10.2538	61.13	25	53.904
W31_68	<50% completeness AND/OR >10% contamination	water	d__Bacteria;p__Chloroflexota;c__Dehalococcoidia;o__Dehalococcoidales;f__UBA5760;g__DUEB01;s__	182	494260	0	0.16	0	0.16	31.06	20	28.848
M30_49	<50% completeness AND/OR >10% contamination	marine	d__Bacteria;p__Chloroflexota;c__Dehalococcoidia;o__Dehalococcoidales;f__UBA5760;g__E44-bin46;s__	395	908610	1.81376	14.66	30	10.262	45.28	30	42.224
M30_50	<50% completeness AND/OR >10% contamination	marine	d__Bacteria;p__Chloroflexota;c__Dehalococcoidia;o__Dehalococcoidales;f__UBA5760;g__E44-bin46;s__	409	984880	0.800097	15.67	56.25	6.85562	35.34	45	37.272
M30_61	<50% completeness AND/OR >10% contamination	marine	d__Bacteria;p__Chloroflexota;c__Dehalococcoidia;o__Dehalococcoidales;f__UBA5760;g__E44-bin46;s__	215	868940	0.262389	18.68	31.25	12.8425	60.91	60	60.728
M43_124	<50% completeness AND/OR >10% contamination	marine	d__Bacteria;p__Chloroflexota;c__Dehalococcoidia;o__Dehalococcoidales;f__UBA5760;g__E44-bin46;s__	115	542880	2.86067	6.36	50	3.18	52.01	35	48.608
M62_258	<50% completeness AND/OR >10% contamination	marine	d__Bacteria;p__Chloroflexota;c__Dehalococcoidia;o__Dehalococcoidales;f__UBA5760;g__E44-bin46;s__	145	337630	0	1.72	0	1.72	25.86	25	25.688
M62_264	<50% completeness AND/OR >10% contamination	marine	d__Bacteria;p__Chloroflexota;c__Dehalococcoidia;o__Dehalococcoidales;f__UBA5760;g__E44-bin46;s__	159	403260	1.9144	8.62	100	0	27.9	20	26.32
M62_266	<50% completeness AND/OR >10% contamination	marine	d__Bacteria;p__Chloroflexota;c__Dehalococcoidia;o__Dehalococcoidales;f__UBA5760;g__E44-bin46;s__	453	2403890	2.44229	16.82	33.33	11.2139	53.23	70	56.584
N11_4	<50% completeness AND/OR >10% contamination	high salt	d__Bacteria;p__Chloroflexota;c__Dehalococcoidia;o__Dehalococcoidales;f__UBA5760;g__E44-bin46;s__	177	719130	0.278114	4.39	12.5	3.84125	46.87	30	43.496
N3_130	<50% completeness AND/OR >10% contamination	high salt	d__Bacteria;p__Chloroflexota;c__Dehalococcoidia;o__Dehalococcoidales;f__UBA5760;g__E44-bin46;s__	183	427040	0.48239	5.49	0	5.49	26.43	0	21.144
W44_95	<50% completeness AND/OR >10% contamination	water	d__Bacteria;p__Chloroflexota;c__Dehalococcoidia;o__Dehalococcoidales;f__UBA5760;g__E44-bin46;s__	101	204400	3.85519	0.16	0	0.16	33.39	10	28.712
W6_133	<50% completeness AND/OR >10% contamination	water	d__Bacteria;p__Chloroflexota;c__Dehalococcoidia;o__Dehalococcoidales;f__UBA5760;g__E44-bin46;s__	261	564270	1.31143	2.59	100	0	28.03	15	25.424
W60_154	<50% completeness AND/OR >10% contamination	water	d__Bacteria;p__Chloroflexota;c__Dehalococcoidia;o__Dehalococcoidales;f__UBA5760;g__E44-bin46;s__	376	861420	0.184579	6.11	20.75	4.84218	27.19	30	27.752
W65_216	<50% completeness AND/OR >10% contamination	water	d__Bacteria;p__Chloroflexota;c__Dehalococcoidia;o__Dehalococcoidales;f__UBA5760;g__E44-bin46;s__	397	910510	0.81383	9.3	35.71	5.97897	46.49	10	39.192
W73_237	<50% completeness AND/OR >10% contamination	water	d__Bacteria;p__Chloroflexota;c__Dehalococcoidia;o__Dehalococcoidales;f__UBA5760;g__E44-bin46;s__	521	1198740	0.847557	16.46	16.67	13.7161	73.17	50	68.536
M54_198	<50% completeness AND/OR >10% contamination	marine	d__Bacteria;p__Chloroflexota;c__Dehalococcoidia;o__Dehalococcoidales;f__UBA5760;g__GCA-2688105;s__	417	1069560	1.34448	15.13	30.77	10.4745	47.55	45	47.04
M62_277	<50% completeness AND/OR >10% contamination	marine	d__Bacteria;p__Chloroflexota;c__Dehalococcoidia;o__Dehalococcoidales;f__UBA5760;g__GCA-2688105;s__	290	701870	0.505792	13.79	11.11	12.2579	39.81	15	34.848
N2_93	<50% completeness AND/OR >10% contamination	high salt	d__Bacteria;p__Chloroflexota;c__Dehalococcoidia;o__Dehalococcoidales;f__UBA5760;g__GCA-2688105;s__	86	282180	0.744206	2.35	62.5	0.88125	27.34	30	27.872
W6_138	<50% completeness AND/OR >10% contamination	water	d__Bacteria;p__Chloroflexota;c__Dehalococcoidia;o__Dehalococcoidales;f__UBA5760;g__GCA-2688105;s__	509	1496600	1.18268	14.48	8.33	13.2738	62.07	40	57.656
W60_172	<50% completeness AND/OR >10% contamination	water	d__Bacteria;p__Chloroflexota;c__Dehalococcoidia;o__Dehalococcoidales;f__UBA5760;g__GCA-2688105;s__	143	605790	0	1.72	0	1.72	26.46	35	28.168
W60_187	<50% completeness AND/OR >10% contamination	water	d__Bacteria;p__Chloroflexota;c__Dehalococcoidia;o__Dehalococcoidales;f__UBA5760;g__GCA-2688105;s__	136	497560	2.43388	4.31	0	4.31	34.53	30	33.624
W65_218	<50% completeness AND/OR >10% contamination	water	d__Bacteria;p__Chloroflexota;c__Dehalococcoidia;o__Dehalococcoidales;f__UBA5760;g__GCA-2688105;s__	393	1064090	0.807263	12.07	0	12.07	50.39	45	49.312
W65_219	<50% completeness AND/OR >10% contamination	water	d__Bacteria;p__Chloroflexota;c__Dehalococcoidia;o__Dehalococcoidales;f__UBA5760;g__GCA-2688105;s__	314	770710	1.12494	14.8	8.33	13.5672	51.35	5	42.08
W73_238	<50% completeness AND/OR >10% contamination	water	d__Bacteria;p__Chloroflexota;c__Dehalococcoidia;o__Dehalococcoidales;f__UBA5760;g__GCA-2688105;s__	363	807120	1.22287	14.14	5.56	13.3538	48.77	40	47.016
M28_42	<50% completeness AND/OR >10% contamination	marine	d__Bacteria;p__Chloroflexota;c__Dehalococcoidia;o__Dehalococcoidales;f__UBA5760;g__S120;s__	271	619950	2.42762	3.53	40	2.118	47.64	10	40.112
M30_55	<50% completeness AND/OR >10% contamination	marine	d__Bacteria;p__Chloroflexota;c__Dehalococcoidia;o__Dehalococcoidales;f__UBA5760;g__S120;s__	431	1209580	0	6.03	0	6.03	31.11	25	29.888
M46_138	<50% completeness AND/OR >10% contamination	marine	d__Bacteria;p__Chloroflexota;c__Dehalococcoidia;o__Dehalococcoidales;f__UBA5760;g__S120;s__	320	749200	0.854245	8.1	0	8.1	46.72	20	41.376
M62_272	<50% completeness AND/OR >10% contamination	marine	d__Bacteria;p__Chloroflexota;c__Dehalococcoidia;o__Dehalococcoidales;f__UBA5760;g__S120;s__	157	326200	2.74985	4.78	66.67	1.59317	31.24	15	27.992
M62_275	<50% completeness AND/OR >10% contamination	marine	d__Bacteria;p__Chloroflexota;c__Dehalococcoidia;o__Dehalococcoidales;f__UBA5760;g__S120;s__	193	451620	2.04375	7.64	12.5	6.685	32.83	40	34.264
M62_280	<50% completeness AND/OR >10% contamination	marine	d__Bacteria;p__Chloroflexota;c__Dehalococcoidia;o__Dehalococcoidales;f__UBA5760;g__S120;s__	290	636390	0.259275	14.18	19.05	11.4787	45.42	5	37.336
M62_286	<50% completeness AND/OR >10% contamination	marine	d__Bacteria;p__Chloroflexota;c__Dehalococcoidia;o__Dehalococcoidales;f__UBA5760;g__S120;s__	574	1685570	0.208831	3.45	100	0	26.52	50	31.216
M9_316	<50% completeness AND/OR >10% contamination	marine	d__Bacteria;p__Chloroflexota;c__Dehalococcoidia;o__Dehalococcoidales;f__UBA5760;g__S120;s__	235	574120	1.16875	10.5	60	4.2	44.51	20	39.608
N3_128	<50% completeness AND/OR >10% contamination	high salt	d__Bacteria;p__Chloroflexota;c__Dehalococcoidia;o__Dehalococcoidales;f__UBA5760;g__S120;s__	298	682440	1.58988	7.76	0	7.76	25.89	5	21.712
W61_210	<50% completeness AND/OR >10% contamination	water	d__Bacteria;p__Chloroflexota;c__Dehalococcoidia;o__Dehalococcoidales;f__UBA5760;g__S120;s__	47	400420	0	0.78	20	0.624	48.28	30	44.624
M9_325	<50% completeness AND/OR >10% contamination	marine	d__Bacteria;p__Chloroflexota;c__Dehalococcoidia;o__Dehalococcoidales;f__UBA5760;g__UBA5760;s__	92	382500	0	0	0	0	47.85	20	42.28
N3_169	<50% completeness AND/OR >10% contamination	high salt	d__Bacteria;p__Chloroflexota;c__Dehalococcoidia;o__Dehalococcoidales;f__UBA5760;g__UBA5760;s__	110	418170	4.36186	3.76	0	3.76	42.01	20	37.608
N13_38	<50% completeness AND/OR >10% contamination	high salt	d__Bacteria;p__Chloroflexota;c__Dehalococcoidia;o__Dehalococcoidales;f__UBA5760;g__W498;s__	164	389070	0	11.6	57.89	4.88476	26.54	10	23.232
N3_147	<50% completeness AND/OR >10% contamination	high salt	d__Bacteria;p__Chloroflexota;c__Dehalococcoidia;o__Dehalococcoidales;f__UBA5760;g__W498;s__	82	456380	7.05333	1.72	0	1.72	27.4	35	28.92
N9_398	<50% completeness AND/OR >10% contamination	high salt	d__Bacteria;p__Chloroflexota;c__Dehalococcoidia;o__Dehalococcoidales;f__UBA5760;g__W498;s__	230	541430	0.738784	6.9	0	6.9	40.09	30	38.072
W105_35	<50% completeness AND/OR >10% contamination	water	d__Bacteria;p__Chloroflexota;c__Dehalococcoidia;o__Dehalococcoidales;f__UBA5760;g__W498;s__	200	540390	2.37606	0	0	0	54.7	15	46.76
M35_76	<50% completeness AND/OR >10% contamination	marine	d__Bacteria;p__Chloroflexota;c__Dehalococcoidia;o__Dehalococcoidales;f__UBA5760;g__W498;s__W498 sp011191875	197	520070	4.05907	1.88	0	1.88	50.87	10	42.696
N4_191	<50% completeness AND/OR >10% contamination	high salt	d__Bacteria;p__Chloroflexota;c__Dehalococcoidia;o__Dehalococcoidales;f__W111;g__;s__	451	927310	0	5.52	0	5.52	40.06	40	40.048
W92_275	<50% completeness AND/OR >10% contamination	water	d__Bacteria;p__Chloroflexota;c__Dehalococcoidia;o__Dehalococcoidales;f__W111;g__;s__	281	780080	1.06528	1.88	0	1.88	25.08	10	22.064
N3_173	<50% completeness AND/OR >10% contamination	high salt	d__Bacteria;p__Chloroflexota;c__Dehalococcoidia;o__Dehalococcoidales;f__W111;g__W111;s__	180	484610	0	0.86	0	0.86	35.66	35	35.528
M58_221	<50% completeness AND/OR >10% contamination	marine	d__Bacteria;p__Chloroflexota;c__Dehalococcoidia;o__Dehalococcoidales;f__W111;g__W111;s__W111 sp011191985	255	685390	2.42636	4.31	0	4.31	59.97	10	49.976
B89_181	<50% completeness AND/OR >10% contamination	soil	d__Bacteria;p__Chloroflexota;c__Dehalococcoidia;o__DSGV01;f__;g__;s__	336	760360	0	0	0	0	32.77	25	31.216
B73_149	<50% completeness AND/OR >10% contamination	soil	d__Bacteria;p__Chloroflexota;c__Dehalococcoidia;o__DSGV01;f__DSGV01;g__DSGV01;s__	895	2.0502e+06	0	5.17	0	5.17	49.72	30	45.776
H39_486	<50% completeness AND/OR >10% contamination	hotsprings	d__Bacteria;p__Chloroflexota;c__Dehalococcoidia;o__DSTF01;f__;g__;s__	143	2305680	0	15.13	15.38	12.803	50	50	50
N13_37	<50% completeness AND/OR >10% contamination	high salt	d__Bacteria;p__Chloroflexota;c__Dehalococcoidia;o__DSTF01;f__;g__;s__	326	758540	0.304532	2.04	0	2.04	31.08	20	28.864
N4_197	<50% completeness AND/OR >10% contamination	high salt	d__Bacteria;p__Chloroflexota;c__Dehalococcoidia;o__DSTF01;f__;g__;s__	226	475950	0	0	0	0	25.08	10	22.064
N7_316	<50% completeness AND/OR >10% contamination	high salt	d__Bacteria;p__Chloroflexota;c__Dehalococcoidia;o__DSTF01;f__;g__;s__	380	937560	0	6.9	40	4.14	51.24	10	42.992
H60_587	<50% completeness AND/OR >10% contamination	hotsprings	d__Bacteria;p__Chloroflexota;c__Dehalococcoidia;o__DSTF01;f__RBG-16-68-14;g__;s__	458	1674270	0	3.61	0	3.61	51.02	40	48.816
H84_855	<50% completeness AND/OR >10% contamination	hotsprings	d__Bacteria;p__Chloroflexota;c__Dehalococcoidia;o__DSTF01;f__RBG-16-68-14;g__;s__	438	1135520	0	1.72	0	1.72	17.55	30	20.04
H39_487	<50% completeness AND/OR >10% contamination	hotsprings	d__Bacteria;p__Chloroflexota;c__Dehalococcoidia;o__DSTF01;f__WHTK01;g__;s__	264	603760	0	1.21	0	1.21	23.05	20	22.44
H62_634	<50% completeness AND/OR >10% contamination	hotsprings	d__Bacteria;p__Chloroflexota;c__Dehalococcoidia;o__DSTF01;f__WHTK01;g__;s__	376	821650	0	1.88	0	1.88	34.61	20	31.688
H66_677	<50% completeness AND/OR >10% contamination	hotsprings	d__Bacteria;p__Chloroflexota;c__Dehalococcoidia;o__GIF9;f__;g__;s__	178	353200	0	3.45	0	3.45	34.4	15	30.52
M30_57	<50% completeness AND/OR >10% contamination	marine	d__Bacteria;p__Chloroflexota;c__Dehalococcoidia;o__GIF9;f__;g__;s__	918	2219190	0	5.17	0	5.17	28.06	45	31.448
N3_133	<50% completeness AND/OR >10% contamination	high salt	d__Bacteria;p__Chloroflexota;c__Dehalococcoidia;o__GIF9;f__;g__;s__	283	598470	0.690093	1.72	0	1.72	15.83	15	15.664
W60_165	<50% completeness AND/OR >10% contamination	water	d__Bacteria;p__Chloroflexota;c__Dehalococcoidia;o__GIF9;f__;g__;s__	735	1734490	0	8.62	16.67	7.18305	44.45	40	43.56
H81_830	<50% completeness AND/OR >10% contamination	hotsprings	d__Bacteria;p__Chloroflexota;c__Dehalococcoidia;o__GIF9;f__AB-539-J10;g__;s__	113	476070	0	10.34	62.5	3.8775	33.39	20	30.712
M1_1	<50% completeness AND/OR >10% contamination	marine	d__Bacteria;p__Chloroflexota;c__Dehalococcoidia;o__GIF9;f__AB-539-J10;g__;s__	119	497940	0	3.45	0	3.45	33.93	45	36.144
M22_23	<50% completeness AND/OR >10% contamination	marine	d__Bacteria;p__Chloroflexota;c__Dehalococcoidia;o__GIF9;f__AB-539-J10;g__;s__	97	284220	2.1603	1.72	0	1.72	23.57	10	20.856
M43_111	<50% completeness AND/OR >10% contamination	marine	d__Bacteria;p__Chloroflexota;c__Dehalococcoidia;o__GIF9;f__AB-539-J10;g__;s__	420	930800	0	6.55	37.5	4.09375	42.32	25	38.856
M51_166	<50% completeness AND/OR >10% contamination	marine	d__Bacteria;p__Chloroflexota;c__Dehalococcoidia;o__GIF9;f__AB-539-J10;g__;s__	150	445070	0	1.72	0	1.72	52.76	10	44.208
M58_214	<50% completeness AND/OR >10% contamination	marine	d__Bacteria;p__Chloroflexota;c__Dehalococcoidia;o__GIF9;f__AB-539-J10;g__;s__	386	1254270	1.61767	6.9	0	6.9	35.34	35	35.272
M7_295	<50% completeness AND/OR >10% contamination	marine	d__Bacteria;p__Chloroflexota;c__Dehalococcoidia;o__GIF9;f__AB-539-J10;g__;s__	313	905010	0	1.72	0	1.72	22.41	25	22.928
M7_298	<50% completeness AND/OR >10% contamination	marine	d__Bacteria;p__Chloroflexota;c__Dehalococcoidia;o__GIF9;f__AB-539-J10;g__;s__	814	1967100	0	8.62	20	6.896	23.3	40	26.64
M7_299	<50% completeness AND/OR >10% contamination	marine	d__Bacteria;p__Chloroflexota;c__Dehalococcoidia;o__GIF9;f__AB-539-J10;g__;s__	613	1647980	0	7.21	0	7.21	33.34	45	35.672
M8_309	<50% completeness AND/OR >10% contamination	marine	d__Bacteria;p__Chloroflexota;c__Dehalococcoidia;o__GIF9;f__AB-539-J10;g__;s__	339	729000	0	6.11	80	1.222	42.62	10	36.096
N11_14	<50% completeness AND/OR >10% contamination	high salt	d__Bacteria;p__Chloroflexota;c__Dehalococcoidia;o__GIF9;f__AB-539-J10;g__;s__	370	1054800	0	14.03	49.02	7.15249	52.16	40	49.728
N11_2	<50% completeness AND/OR >10% contamination	high salt	d__Bacteria;p__Chloroflexota;c__Dehalococcoidia;o__GIF9;f__AB-539-J10;g__;s__	2686	7881050	0	3.76	22.22	2.92453	22.35	85	34.88
N13_35	<50% completeness AND/OR >10% contamination	high salt	d__Bacteria;p__Chloroflexota;c__Dehalococcoidia;o__GIF9;f__AB-539-J10;g__;s__	238	555290	0	6.19	100	0	24.94	20	23.952
N13_39	<50% completeness AND/OR >10% contamination	high salt	d__Bacteria;p__Chloroflexota;c__Dehalococcoidia;o__GIF9;f__AB-539-J10;g__;s__	170	479370	0	1.72	100	0	32.78	30	32.224
N14_65	<50% completeness AND/OR >10% contamination	high salt	d__Bacteria;p__Chloroflexota;c__Dehalococcoidia;o__GIF9;f__AB-539-J10;g__;s__	139	341120	0	13.1	75	3.275	31.83	5	26.464
N2_95	<50% completeness AND/OR >10% contamination	high salt	d__Bacteria;p__Chloroflexota;c__Dehalococcoidia;o__GIF9;f__AB-539-J10;g__;s__	817	1986950	0	4.6	0	4.6	44.55	45	44.64
N3_132	<50% completeness AND/OR >10% contamination	high salt	d__Bacteria;p__Chloroflexota;c__Dehalococcoidia;o__GIF9;f__AB-539-J10;g__;s__	789	1949360	0	9.64	0	9.64	43.28	50	44.624
N3_154	<50% completeness AND/OR >10% contamination	high salt	d__Bacteria;p__Chloroflexota;c__Dehalococcoidia;o__GIF9;f__AB-539-J10;g__;s__	80	319290	0	6.03	80	1.206	31.27	35	32.016
N4_202	<50% completeness AND/OR >10% contamination	high salt	d__Bacteria;p__Chloroflexota;c__Dehalococcoidia;o__GIF9;f__AB-539-J10;g__;s__	429	1.03485e+06	0	7.52	22.22	5.84906	35.52	45	37.416
N6_279	<50% completeness AND/OR >10% contamination	high salt	d__Bacteria;p__Chloroflexota;c__Dehalococcoidia;o__GIF9;f__AB-539-J10;g__;s__	199	535480	0	3.45	75	0.8625	37.1	70	43.68
N7_314	<50% completeness AND/OR >10% contamination	high salt	d__Bacteria;p__Chloroflexota;c__Dehalococcoidia;o__GIF9;f__AB-539-J10;g__;s__	265	771960	0	6.9	33.33	4.60023	30.09	20	28.072
N8_344	<50% completeness AND/OR >10% contamination	high salt	d__Bacteria;p__Chloroflexota;c__Dehalococcoidia;o__GIF9;f__AB-539-J10;g__;s__	813	2599590	0	12.07	30	8.449	47.27	45	46.816
N8_357	<50% completeness AND/OR >10% contamination	high salt	d__Bacteria;p__Chloroflexota;c__Dehalococcoidia;o__GIF9;f__AB-539-J10;g__;s__	889	2594500	0	1.72	66.67	0.573276	23.2	65	31.56
N8_361	<50% completeness AND/OR >10% contamination	high salt	d__Bacteria;p__Chloroflexota;c__Dehalococcoidia;o__GIF9;f__AB-539-J10;g__;s__	522	1559850	0	6.58	0	6.58	45.69	65	49.552
N9_391	<50% completeness AND/OR >10% contamination	high salt	d__Bacteria;p__Chloroflexota;c__Dehalococcoidia;o__GIF9;f__AB-539-J10;g__;s__	373	1103760	0	7.92	87.5	0.99	39.2	50	41.36
N9_394	<50% completeness AND/OR >10% contamination	high salt	d__Bacteria;p__Chloroflexota;c__Dehalococcoidia;o__GIF9;f__AB-539-J10;g__;s__	1208	3429900	0	13.24	0	13.24	62.85	80	66.28
N9_396	<50% completeness AND/OR >10% contamination	high salt	d__Bacteria;p__Chloroflexota;c__Dehalococcoidia;o__GIF9;f__AB-539-J10;g__;s__	624	1551790	0	7.76	0	7.76	46.04	50	46.832
N9_405	<50% completeness AND/OR >10% contamination	high salt	d__Bacteria;p__Chloroflexota;c__Dehalococcoidia;o__GIF9;f__AB-539-J10;g__;s__	30	358430	0	1.72	100	0	30.17	20	28.136
W105_27	<50% completeness AND/OR >10% contamination	water	d__Bacteria;p__Chloroflexota;c__Dehalococcoidia;o__GIF9;f__AB-539-J10;g__;s__	213	464720	0.460492	0	0	0	18.56	25	19.848
W105_31	<50% completeness AND/OR >10% contamination	water	d__Bacteria;p__Chloroflexota;c__Dehalococcoidia;o__GIF9;f__AB-539-J10;g__;s__	250	753410	0	0.16	0	0.16	36.83	20	33.464
W105_37	<50% completeness AND/OR >10% contamination	water	d__Bacteria;p__Chloroflexota;c__Dehalococcoidia;o__GIF9;f__AB-539-J10;g__;s__	394	1.04218e+06	0.911551	1.72	0	1.72	29.37	15	26.496
W79_252	<50% completeness AND/OR >10% contamination	water	d__Bacteria;p__Chloroflexota;c__Dehalococcoidia;o__GIF9;f__AB-539-J10;g__;s__	353	853480	0	10.66	50	5.33	32.98	50	36.384
N11_11	<50% completeness AND/OR >10% contamination	high salt	d__Bacteria;p__Chloroflexota;c__Dehalococcoidia;o__GIF9;f__AB-539-J10;g__20-14-all-45-10;s__	199	468060	0.999872	6.38	16.67	5.31645	48.61	10	40.888
W25_44	<50% completeness AND/OR >10% contamination	water	d__Bacteria;p__Chloroflexota;c__Dehalococcoidia;o__GIF9;f__AB-539-J10;g__20-14-all-45-10;s__	123	324570	0	0	0	0	48.48	0	38.784
W65_220	<50% completeness AND/OR >10% contamination	water	d__Bacteria;p__Chloroflexota;c__Dehalococcoidia;o__GIF9;f__AB-539-J10;g__20-14-all-45-10;s__	199	830210	1.50685	10.34	0	10.34	56.9	15	48.52
M32_71	<50% completeness AND/OR >10% contamination	marine	d__Bacteria;p__Chloroflexota;c__Dehalococcoidia;o__GIF9;f__AB-539-J10;g__B68-G16;s__	112	421430	0	0.47	0	0.47	55.56	20	48.448
M37_78	<50% completeness AND/OR >10% contamination	marine	d__Bacteria;p__Chloroflexota;c__Dehalococcoidia;o__GIF9;f__AB-539-J10;g__B68-G16;s__	165	585170	0	13.48	15.79	11.3515	58.86	30	53.088
M43_117	<50% completeness AND/OR >10% contamination	marine	d__Bacteria;p__Chloroflexota;c__Dehalococcoidia;o__GIF9;f__AB-539-J10;g__B68-G16;s__	592	1454740	0	3.45	33.33	2.30011	41.72	70	47.376
M51_161	<50% completeness AND/OR >10% contamination	marine	d__Bacteria;p__Chloroflexota;c__Dehalococcoidia;o__GIF9;f__AB-539-J10;g__B68-G16;s__	162	643080	0	5.33	25	3.9975	46.99	60	49.592
M9_334	<50% completeness AND/OR >10% contamination	marine	d__Bacteria;p__Chloroflexota;c__Dehalococcoidia;o__GIF9;f__AB-539-J10;g__B68-G16;s__	114	518800	0	1.72	100	0	44.75	25	40.8
W61_193	<50% completeness AND/OR >10% contamination	water	d__Bacteria;p__Chloroflexota;c__Dehalococcoidia;o__GIF9;f__AB-539-J10;g__B68-G16;s__	432	1435350	0	9.95	58.06	4.17303	43.1	70	48.48
W65_214	<50% completeness AND/OR >10% contamination	water	d__Bacteria;p__Chloroflexota;c__Dehalococcoidia;o__GIF9;f__AB-539-J10;g__B68-G16;s__	192	1123990	0	11.21	0	11.21	37.93	60	42.344
M37_79	<50% completeness AND/OR >10% contamination	marine	d__Bacteria;p__Chloroflexota;c__Dehalococcoidia;o__GIF9;f__AB-539-J10;g__CG2-30-46-19;s__	134	409900	0	2.35	20	1.88	32.84	50	36.272
M43_114	<50% completeness AND/OR >10% contamination	marine	d__Bacteria;p__Chloroflexota;c__Dehalococcoidia;o__GIF9;f__AB-539-J10;g__CG2-30-46-19;s__	214	588940	0	3.45	0	3.45	29.23	25	28.384
M48_143	<50% completeness AND/OR >10% contamination	marine	d__Bacteria;p__Chloroflexota;c__Dehalococcoidia;o__GIF9;f__AB-539-J10;g__CG2-30-46-19;s__	248	706640	0	1.72	100	0	28.92	15	26.136
M48_154	<50% completeness AND/OR >10% contamination	marine	d__Bacteria;p__Chloroflexota;c__Dehalococcoidia;o__GIF9;f__AB-539-J10;g__CG2-30-46-19;s__	230	708400	0	13.17	13.33	11.4144	72.41	30	63.928
M58_224	<50% completeness AND/OR >10% contamination	marine	d__Bacteria;p__Chloroflexota;c__Dehalococcoidia;o__GIF9;f__AB-539-J10;g__CG2-30-46-19;s__	239	597800	0	1.5	83.33	0.25005	48.15	15	41.52
N14_54	<50% completeness AND/OR >10% contamination	high salt	d__Bacteria;p__Chloroflexota;c__Dehalococcoidia;o__GIF9;f__AB-539-J10;g__CG2-30-46-19;s__	95	356400	0	1.72	100	0	33.86	30	33.088
N7_322	<50% completeness AND/OR >10% contamination	high salt	d__Bacteria;p__Chloroflexota;c__Dehalococcoidia;o__GIF9;f__AB-539-J10;g__CG2-30-46-19;s__	202	540180	0	5.33	50	2.665	40.52	20	36.416
N9_387	<50% completeness AND/OR >10% contamination	high salt	d__Bacteria;p__Chloroflexota;c__Dehalococcoidia;o__GIF9;f__AB-539-J10;g__CG2-30-46-19;s__	200	580320	0	6.54	66.67	2.17978	56.03	15	47.824
W6_135	<50% completeness AND/OR >10% contamination	water	d__Bacteria;p__Chloroflexota;c__Dehalococcoidia;o__GIF9;f__AB-539-J10;g__CG2-30-46-19;s__	215	908520	0	2.59	0	2.59	25	50	30
H62_631	<50% completeness AND/OR >10% contamination	hotsprings	d__Bacteria;p__Chloroflexota;c__Dehalococcoidia;o__GIF9;f__AB-539-J10;g__DTMR01;s__	193	404630	0	1.72	0	1.72	29.29	0	23.432
M9_322	<50% completeness AND/OR >10% contamination	marine	d__Bacteria;p__Chloroflexota;c__Dehalococcoidia;o__GIF9;f__AB-539-J10;g__E29-bin73;s__	490	1196530	0	0	0	0	16.14	65	25.912
M51_167	<50% completeness AND/OR >10% contamination	marine	d__Bacteria;p__Chloroflexota;c__Dehalococcoidia;o__GIF9;f__AB-539-J10;g__E29-bin73;s__E29-bin73 sp004375885	172	531250	0	1.72	100	0	45.41	25	41.328
W61_203	<50% completeness AND/OR >10% contamination	water	d__Bacteria;p__Chloroflexota;c__Dehalococcoidia;o__GIF9;f__AB-539-J10;g__E29-bin73;s__E29-bin73 sp004375885	49	181420	0	0.86	100	0	33.7	15	29.96
H67_689	<50% completeness AND/OR >10% contamination	hotsprings	d__Bacteria;p__Chloroflexota;c__Dehalococcoidia;o__GIF9;f__AB-539-J10;g__E44-bin10;s__	334	668140	0	0.47	50	0.235	30.83	20	28.664
M28_44	<50% completeness AND/OR >10% contamination	marine	d__Bacteria;p__Chloroflexota;c__Dehalococcoidia;o__GIF9;f__AB-539-J10;g__E44-bin10;s__	162	369420	0	1.72	0	1.72	25.77	20	24.616
M43_116	<50% completeness AND/OR >10% contamination	marine	d__Bacteria;p__Chloroflexota;c__Dehalococcoidia;o__GIF9;f__AB-539-J10;g__E44-bin10;s__	314	846210	0	1.72	0	1.72	17.82	35	21.256
M48_149	<50% completeness AND/OR >10% contamination	marine	d__Bacteria;p__Chloroflexota;c__Dehalococcoidia;o__GIF9;f__AB-539-J10;g__E44-bin10;s__	132	300610	0.665314	0	0	0	24.4	15	22.52
M58_217	<50% completeness AND/OR >10% contamination	marine	d__Bacteria;p__Chloroflexota;c__Dehalococcoidia;o__GIF9;f__AB-539-J10;g__E44-bin10;s__	333	1208530	0	16.14	60	6.456	44.22	45	44.376
M62_260	<50% completeness AND/OR >10% contamination	marine	d__Bacteria;p__Chloroflexota;c__Dehalococcoidia;o__GIF9;f__AB-539-J10;g__E44-bin10;s__	392	1133390	0	0.86	0	0.86	38.17	40	38.536
M7_292	<50% completeness AND/OR >10% contamination	marine	d__Bacteria;p__Chloroflexota;c__Dehalococcoidia;o__GIF9;f__AB-539-J10;g__E44-bin10;s__	167	420830	0	5.17	66.67	1.72316	36.78	40	37.424
M7_294	<50% completeness AND/OR >10% contamination	marine	d__Bacteria;p__Chloroflexota;c__Dehalococcoidia;o__GIF9;f__AB-539-J10;g__E44-bin10;s__	128	344390	0	6.27	10	5.643	27.82	10	24.256
M8_306	<50% completeness AND/OR >10% contamination	marine	d__Bacteria;p__Chloroflexota;c__Dehalococcoidia;o__GIF9;f__AB-539-J10;g__E44-bin10;s__	715	1541710	0	3.92	0	3.92	31.46	75	40.168
N11_12	<50% completeness AND/OR >10% contamination	high salt	d__Bacteria;p__Chloroflexota;c__Dehalococcoidia;o__GIF9;f__AB-539-J10;g__E44-bin10;s__	170	689760	0	16.38	90.91	1.48894	32.99	40	34.392
N11_15	<50% completeness AND/OR >10% contamination	high salt	d__Bacteria;p__Chloroflexota;c__Dehalococcoidia;o__GIF9;f__AB-539-J10;g__E44-bin10;s__	108	519030	0	1.13	37.5	0.70625	35.27	60	40.216
N11_5	<50% completeness AND/OR >10% contamination	high salt	d__Bacteria;p__Chloroflexota;c__Dehalococcoidia;o__GIF9;f__AB-539-J10;g__E44-bin10;s__	232	957580	0	17.24	52.63	8.16659	27.04	30	27.632
N11_7	<50% completeness AND/OR >10% contamination	high salt	d__Bacteria;p__Chloroflexota;c__Dehalococcoidia;o__GIF9;f__AB-539-J10;g__E44-bin10;s__	117	505870	0	18.97	85.71	2.71081	35.89	20	32.712
N12_24	<50% completeness AND/OR >10% contamination	high salt	d__Bacteria;p__Chloroflexota;c__Dehalococcoidia;o__GIF9;f__AB-539-J10;g__E44-bin10;s__	44	424750	0	0	0	0	36.21	55	39.968
N12_31	<50% completeness AND/OR >10% contamination	high salt	d__Bacteria;p__Chloroflexota;c__Dehalococcoidia;o__GIF9;f__AB-539-J10;g__E44-bin10;s__	57	288360	0	4.31	50	2.155	39.66	30	37.728
N13_40	<50% completeness AND/OR >10% contamination	high salt	d__Bacteria;p__Chloroflexota;c__Dehalococcoidia;o__GIF9;f__AB-539-J10;g__E44-bin10;s__	47	346340	0	12.64	100	0	31.35	15	28.08
N13_42	<50% completeness AND/OR >10% contamination	high salt	d__Bacteria;p__Chloroflexota;c__Dehalococcoidia;o__GIF9;f__AB-539-J10;g__E44-bin10;s__	836	2016780	1.54603	1.72	100	0	19.83	35	22.864
N14_61	<50% completeness AND/OR >10% contamination	high salt	d__Bacteria;p__Chloroflexota;c__Dehalococcoidia;o__GIF9;f__AB-539-J10;g__E44-bin10;s__	97	468980	0	2.59	0	2.59	37.05	55	40.64
N14_69	<50% completeness AND/OR >10% contamination	high salt	d__Bacteria;p__Chloroflexota;c__Dehalococcoidia;o__GIF9;f__AB-539-J10;g__E44-bin10;s__	405	1337490	0	17.24	58.82	7.09943	34.8	30	33.84
N2_109	<50% completeness AND/OR >10% contamination	high salt	d__Bacteria;p__Chloroflexota;c__Dehalococcoidia;o__GIF9;f__AB-539-J10;g__E44-bin10;s__	229	1005620	0	0.86	100	0	45.87	55	47.696
N2_111	<50% completeness AND/OR >10% contamination	high salt	d__Bacteria;p__Chloroflexota;c__Dehalococcoidia;o__GIF9;f__AB-539-J10;g__E44-bin10;s__	298	1377800	0	7.76	20	6.208	29.31	50	33.448
N2_75	<50% completeness AND/OR >10% contamination	high salt	d__Bacteria;p__Chloroflexota;c__Dehalococcoidia;o__GIF9;f__AB-539-J10;g__E44-bin10;s__	617	3206900	0	6.9	20	5.52	44.91	50	45.928
N2_88	<50% completeness AND/OR >10% contamination	high salt	d__Bacteria;p__Chloroflexota;c__Dehalococcoidia;o__GIF9;f__AB-539-J10;g__E44-bin10;s__	318	1049740	0	3.45	50	1.725	25	45	29
N3_115	<50% completeness AND/OR >10% contamination	high salt	d__Bacteria;p__Chloroflexota;c__Dehalococcoidia;o__GIF9;f__AB-539-J10;g__E44-bin10;s__	614	1492870	0	12.07	40	7.242	41.72	45	42.376
N3_120	<50% completeness AND/OR >10% contamination	high salt	d__Bacteria;p__Chloroflexota;c__Dehalococcoidia;o__GIF9;f__AB-539-J10;g__E44-bin10;s__	260	918680	0	6.9	40	4.14	27.38	45	30.904
N3_148	<50% completeness AND/OR >10% contamination	high salt	d__Bacteria;p__Chloroflexota;c__Dehalococcoidia;o__GIF9;f__AB-539-J10;g__E44-bin10;s__	61	256920	0	9.09	46.15	4.89497	29.15	40	31.32
N3_162	<50% completeness AND/OR >10% contamination	high salt	d__Bacteria;p__Chloroflexota;c__Dehalococcoidia;o__GIF9;f__AB-539-J10;g__E44-bin10;s__	76	387390	0	3.45	66.67	1.14988	31.19	60	36.952
N4_200	<50% completeness AND/OR >10% contamination	high salt	d__Bacteria;p__Chloroflexota;c__Dehalococcoidia;o__GIF9;f__AB-539-J10;g__E44-bin10;s__	586	1434190	0	2.59	50	1.295	28.06	30	28.448
N4_207	<50% completeness AND/OR >10% contamination	high salt	d__Bacteria;p__Chloroflexota;c__Dehalococcoidia;o__GIF9;f__AB-539-J10;g__E44-bin10;s__	243	790840	0	7.76	14.29	6.6511	40.7	70	46.56
N7_311	<50% completeness AND/OR >10% contamination	high salt	d__Bacteria;p__Chloroflexota;c__Dehalococcoidia;o__GIF9;f__AB-539-J10;g__E44-bin10;s__	349	1568990	0	16.85	30	11.795	81.82	70	79.456
N7_334	<50% completeness AND/OR >10% contamination	high salt	d__Bacteria;p__Chloroflexota;c__Dehalococcoidia;o__GIF9;f__AB-539-J10;g__E44-bin10;s__	69	267740	0	0	0	0	26.1	10	22.88
N8_355	<50% completeness AND/OR >10% contamination	high salt	d__Bacteria;p__Chloroflexota;c__Dehalococcoidia;o__GIF9;f__AB-539-J10;g__E44-bin10;s__	320	923440	0	6.9	50	3.45	46.23	30	42.984
N8_358	<50% completeness AND/OR >10% contamination	high salt	d__Bacteria;p__Chloroflexota;c__Dehalococcoidia;o__GIF9;f__AB-539-J10;g__E44-bin10;s__	599	1784890	0	2.87	0	2.87	26.72	50	31.376
N8_363	<50% completeness AND/OR >10% contamination	high salt	d__Bacteria;p__Chloroflexota;c__Dehalococcoidia;o__GIF9;f__AB-539-J10;g__E44-bin10;s__	124	978850	0	5.17	33.33	3.44684	37.3	65	42.84
N9_383	<50% completeness AND/OR >10% contamination	high salt	d__Bacteria;p__Chloroflexota;c__Dehalococcoidia;o__GIF9;f__AB-539-J10;g__E44-bin10;s__	476	3382540	0	17.24	53.33	8.04591	39.18	75	46.344
N9_389	<50% completeness AND/OR >10% contamination	high salt	d__Bacteria;p__Chloroflexota;c__Dehalococcoidia;o__GIF9;f__AB-539-J10;g__E44-bin10;s__	313	948680	0	2.59	50	1.295	32.76	35	33.208
W92_269	<50% completeness AND/OR >10% contamination	water	d__Bacteria;p__Chloroflexota;c__Dehalococcoidia;o__GIF9;f__AB-539-J10;g__E44-bin10;s__	119	847540	0	6.03	75	1.5075	31.9	40	33.52
H23_312	<50% completeness AND/OR >10% contamination	hotsprings	d__Bacteria;p__Chloroflexota;c__Dehalococcoidia;o__GIF9;f__AB-539-J10;g__JACAEN01;s__	432	1263140	0	14.58	55.56	6.47935	48.04	35	45.432
H85_863	<50% completeness AND/OR >10% contamination	hotsprings	d__Bacteria;p__Chloroflexota;c__Dehalococcoidia;o__GIF9;f__AB-539-J10;g__JACAEN01;s__	361	1312240	0	17.24	31.58	11.7956	56.5	55	56.2
W73_241	<50% completeness AND/OR >10% contamination	water	d__Bacteria;p__Chloroflexota;c__Dehalococcoidia;o__GIF9;f__AB-539-J10;g__JACAEN01;s__	435	932870	0	5.17	33.33	3.44684	30.04	30	30.032
H67_693	<50% completeness AND/OR >10% contamination	hotsprings	d__Bacteria;p__Chloroflexota;c__Dehalococcoidia;o__GIF9;f__AB-539-J10;g__RBG-13-51-36;s__	394	1053860	0	5.64	16.67	4.69981	36.55	35	36.24
M22_37	<50% completeness AND/OR >10% contamination	marine	d__Bacteria;p__Chloroflexota;c__Dehalococcoidia;o__GIF9;f__AB-539-J10;g__RBG-13-51-36;s__	65	375930	0	1.72	100	0	25.94	35	27.752
M22_38	<50% completeness AND/OR >10% contamination	marine	d__Bacteria;p__Chloroflexota;c__Dehalococcoidia;o__GIF9;f__AB-539-J10;g__RBG-13-51-36;s__	119	778120	0	3.45	50	1.725	28.1	85	39.48
M58_210	<50% completeness AND/OR >10% contamination	marine	d__Bacteria;p__Chloroflexota;c__Dehalococcoidia;o__GIF9;f__AB-539-J10;g__RBG-13-51-36;s__	158	391300	0	2.35	83.33	0.391745	34.42	10	29.536
M58_243	<50% completeness AND/OR >10% contamination	marine	d__Bacteria;p__Chloroflexota;c__Dehalococcoidia;o__GIF9;f__AB-539-J10;g__RBG-13-51-36;s__	298	951880	0	0	0	0	43.35	65	47.68
N14_64	<50% completeness AND/OR >10% contamination	high salt	d__Bacteria;p__Chloroflexota;c__Dehalococcoidia;o__GIF9;f__AB-539-J10;g__RBG-13-51-36;s__	119	543000	0	9.48	33.33	6.32032	47.65	55	49.12
N3_166	<50% completeness AND/OR >10% contamination	high salt	d__Bacteria;p__Chloroflexota;c__Dehalococcoidia;o__GIF9;f__AB-539-J10;g__RBG-13-51-36;s__	220	837860	0	1.88	50	0.94	40.75	25	37.6
W7_227	<50% completeness AND/OR >10% contamination	water	d__Bacteria;p__Chloroflexota;c__Dehalococcoidia;o__GIF9;f__AB-539-J10;g__RBG-13-51-36;s__	291	662400	0	0.86	0	0.86	40.69	30	38.552
W79_248	<50% completeness AND/OR >10% contamination	water	d__Bacteria;p__Chloroflexota;c__Dehalococcoidia;o__GIF9;f__AB-539-J10;g__RBG-13-51-36;s__	346	708940	0	0.16	100	0	37.98	10	32.384
M39_81	<50% completeness AND/OR >10% contamination	marine	d__Bacteria;p__Chloroflexota;c__Dehalococcoidia;o__GIF9;f__AB-539-J10;g__SKVJ01;s__	244	518320	0	0	0	0	25.39	10	22.312
M48_151	<50% completeness AND/OR >10% contamination	marine	d__Bacteria;p__Chloroflexota;c__Dehalococcoidia;o__GIF9;f__AB-539-J10;g__SKVJ01;s__	810	1976510	0	1.72	0	1.72	21.94	50	27.552
H82_848	<50% completeness AND/OR >10% contamination	hotsprings	d__Bacteria;p__Chloroflexota;c__Dehalococcoidia;o__GIF9;f__UBA5620;g__;s__	41	371980	0	10.97	17.86	9.01076	29.31	50	33.448
H67_694	<50% completeness AND/OR >10% contamination	hotsprings	d__Bacteria;p__Chloroflexota;c__Dehalococcoidia;o__GIF9;f__UBA5620;g__9FT-COMBO-48-23;s__	320	800480	0	8.78	0	8.78	44.21	25	40.368
W105_32	<50% completeness AND/OR >10% contamination	water	d__Bacteria;p__Chloroflexota;c__Dehalococcoidia;o__GIF9;f__UBA5620;g__9FT-COMBO-48-23;s__	229	582300	0	0	0	0	46.61	15	40.288
W44_97	<50% completeness AND/OR >10% contamination	water	d__Bacteria;p__Chloroflexota;c__Dehalococcoidia;o__GIF9;f__UBA5620;g__9FT-COMBO-48-23;s__	271	594310	0	0	0	0	23.07	0	18.456
W6_132	<50% completeness AND/OR >10% contamination	water	d__Bacteria;p__Chloroflexota;c__Dehalococcoidia;o__GIF9;f__UBA5620;g__JACNFS01;s__	617	1392690	0	3.45	0	3.45	21.63	5	18.304
W60_181	<50% completeness AND/OR >10% contamination	water	d__Bacteria;p__Chloroflexota;c__Dehalococcoidia;o__GIF9;f__UBA5620;g__JACNFS01;s__	111	334800	1.3172	1.72	0	1.72	23.28	25	23.624
H78_778	<50% completeness AND/OR >10% contamination	hotsprings	d__Bacteria;p__Chloroflexota;c__Dehalococcoidia;o__GIF9;f__UBA5620;g__SpSt-1004;s__	11	1621640	10.6306	0	0	0	97.41	100	97.928
H66_680	<50% completeness AND/OR >10% contamination	hotsprings	d__Bacteria;p__Chloroflexota;c__Dehalococcoidia;o__GIF9;f__UBA5629;g__;s__	467	1.03487e+06	0	1.72	0	1.72	22.01	35	24.608
W60_142	<50% completeness AND/OR >10% contamination	water	d__Bacteria;p__Chloroflexota;c__Dehalococcoidia;o__JdFR-54;f__JdFR-54;g__JdFR-54;s__	233	531140	0	3.45	0	3.45	33.31	20	30.648
S1_14	<50% completeness AND/OR >10% contamination	corals/sponges	d__Bacteria;p__Chloroflexota;c__Dehalococcoidia;o__SAR202;f__;g__;s__	1120	2.05111e+06	0	5.75	0	5.75	22.65	20	22.12
S34_269	<50% completeness AND/OR >10% contamination	corals/sponges	d__Bacteria;p__Chloroflexota;c__Dehalococcoidia;o__SAR202;f__;g__;s__	483	1.03592e+06	0	5.33	0	5.33	39.15	25	36.32
S1_15	<50% completeness AND/OR >10% contamination	corals/sponges	d__Bacteria;p__Chloroflexota;c__Dehalococcoidia;o__SAR202;f__UBA11138;g__;s__	386	2548610	0	14.66	9.09	13.3274	87.93	85	87.344
S1_37	<50% completeness AND/OR >10% contamination	corals/sponges	d__Bacteria;p__Chloroflexota;c__Dehalococcoidia;o__SAR202;f__UBA11138;g__;s__	716	1624300	0	17.88	20	14.304	48.66	20	42.928
S1_39	<50% completeness AND/OR >10% contamination	corals/sponges	d__Bacteria;p__Chloroflexota;c__Dehalococcoidia;o__SAR202;f__UBA11138;g__;s__	543	3621270	0	10.66	0	10.66	95.69	85	93.552
S1_46	<50% completeness AND/OR >10% contamination	corals/sponges	d__Bacteria;p__Chloroflexota;c__Dehalococcoidia;o__SAR202;f__UBA11138;g__;s__	134	812880	0	0	0	0	32.21	40	33.768
S29_217	<50% completeness AND/OR >10% contamination	corals/sponges	d__Bacteria;p__Chloroflexota;c__Dehalococcoidia;o__SAR202;f__UBA11138;g__Bin90;s__	840	2270420	0.163406	6.3	33.33	4.20021	51.8	35	48.44
S20_125	<50% completeness AND/OR >10% contamination	corals/sponges	d__Bacteria;p__Chloroflexota;c__Dehalococcoidia;o__SAR202;f__UBA11138;g__VXRN01;s__	787	1665070	0	3.45	33.33	2.30011	30.71	25	29.568
S7_348	<50% completeness AND/OR >10% contamination	corals/sponges	d__Bacteria;p__Chloroflexota;c__Dehalococcoidia;o__SAR202;f__UBA11138;g__VXRN01;s__	230	819780	0	1.72	0	1.72	36.24	20	32.992
S1_25	<50% completeness AND/OR >10% contamination	corals/sponges	d__Bacteria;p__Chloroflexota;c__Dehalococcoidia;o__SAR202;f__VXLM01;g__;s__	616	2564860	0	12.07	0	12.07	83.62	65	79.896
S1_34	<50% completeness AND/OR >10% contamination	corals/sponges	d__Bacteria;p__Chloroflexota;c__Dehalococcoidia;o__SAR202;f__VXLM01;g__;s__	981	3038960	0	13.07	0	13.07	70.74	55	67.592
S11_71	<50% completeness AND/OR >10% contamination	corals/sponges	d__Bacteria;p__Chloroflexota;c__Dehalococcoidia;o__SAR202;f__VXLM01;g__;s__	133	659060	0	0	0	0	52.59	30	48.072
S34_285	<50% completeness AND/OR >10% contamination	corals/sponges	d__Bacteria;p__Chloroflexota;c__Dehalococcoidia;o__SAR202;f__VXLM01;g__;s__	509	1532140	0	4.23	0	4.23	51.47	40	49.176
S5_314	<50% completeness AND/OR >10% contamination	corals/sponges	d__Bacteria;p__Chloroflexota;c__Dehalococcoidia;o__SAR202;f__VXLM01;g__;s__	405	1030210	0	7.76	0	7.76	43.01	20	38.408
S1_23	<50% completeness AND/OR >10% contamination	corals/sponges	d__Bacteria;p__Chloroflexota;c__Dehalococcoidia;o__SAR202;f__VXLM01;g__VXLM01;s__	300	1001790	0	12.07	94.44	0.671092	34.48	10	29.584
S1_49	<50% completeness AND/OR >10% contamination	corals/sponges	d__Bacteria;p__Chloroflexota;c__Dehalococcoidia;o__SAR202;f__VXLM01;g__VXLM01;s__	268	1059190	0	4.31	66.67	1.43652	37.93	15	33.344
S29_208	<50% completeness AND/OR >10% contamination	corals/sponges	d__Bacteria;p__Chloroflexota;c__Dehalococcoidia;o__SHYB01;f__SHYB01;g__;s__	484	1050040	0	2.04	66.67	0.679932	37.6	25	35.08
H82_851	<50% completeness AND/OR >10% contamination	hotsprings	d__Bacteria;p__Chloroflexota;c__Dehalococcoidia;o__SHYD01;f__SHYC01;g__;s__	279	668750	0	0	0	0	39.2	45	40.36
H83_854	<50% completeness AND/OR >10% contamination	hotsprings	d__Bacteria;p__Chloroflexota;c__Dehalococcoidia;o__SM23-28-2;f__HRbin24;g__HRBIN24;s__HRBIN24 sp002898715	182	1132950	0	1.72	0	1.72	38.48	50	40.784
H94_898	<50% completeness AND/OR >10% contamination	hotsprings	d__Bacteria;p__Chloroflexota;c__Dehalococcoidia;o__SM23-28-2;f__HRbin24;g__HRBIN25;s__	349	757660	0	1.72	100	0	41.96	15	36.568
S7_333	<50% completeness AND/OR >10% contamination	corals/sponges	d__Bacteria;p__Chloroflexota;c__Dehalococcoidia;o__SM23-28-2;f__RBG-16-64-32;g__;s__	241	662820	0	0	0	0	53.53	25	47.824
H77_771	<50% completeness AND/OR >10% contamination	hotsprings	d__Bacteria;p__Chloroflexota;c__Dehalococcoidia;o__SM23-28-2;f__RBG-16-64-32;g__RBG-16-64-32;s__	410	1148010	0	0	0	0	48.79	15	42.032
M42_97	<50% completeness AND/OR >10% contamination	marine	d__Bacteria;p__Chloroflexota;c__Dehalococcoidia;o__SM23-28-2;f__RBG-16-64-32;g__RBG-16-64-32;s__	519	1329780	0	0.86	0	0.86	20.61	15	19.488
W60_182	<50% completeness AND/OR >10% contamination	water	d__Bacteria;p__Chloroflexota;c__Dehalococcoidia;o__SM23-28-2;f__RBG-16-64-32;g__RBG-16-64-32;s__	457	926120	0	12.93	55.56	5.74609	48.76	10	41.008
W61_200	<50% completeness AND/OR >10% contamination	water	d__Bacteria;p__Chloroflexota;c__Dehalococcoidia;o__SM23-28-2;f__SM23-28-2;g__;s__	710	1435110	0	7.37	14.29	6.31683	37.87	35	37.296
M43_109	<50% completeness AND/OR >10% contamination	marine	d__Bacteria;p__Chloroflexota;c__Dehalococcoidia;o__SM23-28-2;f__SM23-28-2;g__SM23-28-2;s__	476	1094260	0	5.17	33.33	3.44684	37.15	35	36.72
M43_129	<50% completeness AND/OR >10% contamination	marine	d__Bacteria;p__Chloroflexota;c__Dehalococcoidia;o__SM23-28-2;f__SM23-28-2;g__SM23-28-2;s__	299	819320	0	0.86	100	0	47.34	50	47.872
M9_327	<50% completeness AND/OR >10% contamination	marine	d__Bacteria;p__Chloroflexota;c__Dehalococcoidia;o__SM23-28-2;f__SM23-28-2;g__SM23-28-2;s__	140	371590	0	2.04	66.67	0.679932	37.15	15	32.72
N2_112	<50% completeness AND/OR >10% contamination	high salt	d__Bacteria;p__Chloroflexota;c__Dehalococcoidia;o__SM23-28-2;f__SM23-28-2;g__SM23-28-2;s__	507	1128240	0	8.95	11.11	7.95565	54.86	30	49.888
N2_96	<50% completeness AND/OR >10% contamination	high salt	d__Bacteria;p__Chloroflexota;c__Dehalococcoidia;o__SM23-28-2;f__SM23-28-2;g__SM23-28-2;s__	414	866830	0	7.59	83.33	1.26525	36.69	10	31.352
N3_143	<50% completeness AND/OR >10% contamination	high salt	d__Bacteria;p__Chloroflexota;c__Dehalococcoidia;o__SM23-28-2;f__SM23-28-2;g__SM23-28-2;s__	184	680420	0	0.5	100	0	42.71	45	43.168
N3_145	<50% completeness AND/OR >10% contamination	high salt	d__Bacteria;p__Chloroflexota;c__Dehalococcoidia;o__SM23-28-2;f__SM23-28-2;g__SM23-28-2;s__	216	820240	0	2.9	75	0.725	28.45	50	32.76
N4_206	<50% completeness AND/OR >10% contamination	high salt	d__Bacteria;p__Chloroflexota;c__Dehalococcoidia;o__SM23-28-2;f__SM23-28-2;g__SM23-28-2;s__	252	922550	0	11.21	0	11.21	54.44	35	50.552
N4_215	<50% completeness AND/OR >10% contamination	high salt	d__Bacteria;p__Chloroflexota;c__Dehalococcoidia;o__SM23-28-2;f__SM23-28-2;g__SM23-28-2;s__	123	1017240	0	0	0	0	44.83	65	48.864
N7_338	<50% completeness AND/OR >10% contamination	high salt	d__Bacteria;p__Chloroflexota;c__Dehalococcoidia;o__SM23-28-2;f__SM23-28-2;g__SM23-28-2;s__	436	1006070	0	11.13	90.91	1.01172	49.29	20	43.432
W105_33	<50% completeness AND/OR >10% contamination	water	d__Bacteria;p__Chloroflexota;c__Dehalococcoidia;o__SM23-28-2;f__SM23-28-2;g__SM23-28-2;s__	289	660460	0	0	0	0	35.71	10	30.568
W25_43	<50% completeness AND/OR >10% contamination	water	d__Bacteria;p__Chloroflexota;c__Dehalococcoidia;o__SM23-28-2;f__SM23-28-2;g__SM23-28-2;s__	134	273730	1.5855	0	0	0	23.14	0	18.512
W60_155	<50% completeness AND/OR >10% contamination	water	d__Bacteria;p__Chloroflexota;c__Dehalococcoidia;o__SM23-28-2;f__SM23-28-2;g__SM23-28-2;s__	278	529040	0	2.19	60	0.876	28.68	10	24.944
W61_204	<50% completeness AND/OR >10% contamination	water	d__Bacteria;p__Chloroflexota;c__Dehalococcoidia;o__SM23-28-2;f__SM23-28-2;g__SM23-28-2;s__	160	369510	0	0	0	0	29.49	35	30.592
W61_209	<50% completeness AND/OR >10% contamination	water	d__Bacteria;p__Chloroflexota;c__Dehalococcoidia;o__SM23-28-2;f__SM23-28-2;g__SM23-28-2;s__	240	730220	0	2.04	66.67	0.679932	42.47	25	38.976
M58_235	<50% completeness AND/OR >10% contamination	marine	d__Bacteria;p__Chloroflexota;c__Dehalococcoidia;o__SM23-28-2;f__SM23-28-2;g__SM23-28-2;s__SM23-28-2 sp001303545	453	1082610	0	0.78	71.43	0.222846	44.11	15	38.288
M32_70	<50% completeness AND/OR >10% contamination	marine	d__Bacteria;p__Chloroflexota;c__Dehalococcoidia;o__SZUA-161;f__;g__;s__	198	416540	0	0	0	0	25.33	5	21.264
M62_270	<50% completeness AND/OR >10% contamination	marine	d__Bacteria;p__Chloroflexota;c__Dehalococcoidia;o__SZUA-161;f__;g__;s__	265	593610	0	6.9	60	2.76	38.26	5	31.608
W60_180	<50% completeness AND/OR >10% contamination	water	d__Bacteria;p__Chloroflexota;c__Dehalococcoidia;o__SZUA-161;f__;g__;s__	424	1231420	0	9.48	28.57	6.77156	27.4	45	30.92
M30_51	<50% completeness AND/OR >10% contamination	marine	d__Bacteria;p__Chloroflexota;c__Dehalococcoidia;o__SZUA-161;f__E44-bin15;g__;s__	150	365550	0.437697	0	0	0	23.67	5	19.936
M30_54	<50% completeness AND/OR >10% contamination	marine	d__Bacteria;p__Chloroflexota;c__Dehalococcoidia;o__SZUA-161;f__E44-bin15;g__;s__	231	526670	0	1.72	100	0	32.2	20	29.76
M58_239	<50% completeness AND/OR >10% contamination	marine	d__Bacteria;p__Chloroflexota;c__Dehalococcoidia;o__SZUA-161;f__E44-bin15;g__;s__	190	522660	0	0.86	100	0	32.96	10	28.368
M62_281	<50% completeness AND/OR >10% contamination	marine	d__Bacteria;p__Chloroflexota;c__Dehalococcoidia;o__SZUA-161;f__E44-bin15;g__;s__	281	769280	0	0.47	66.67	0.156651	44.36	15	38.488
M62_291	<50% completeness AND/OR >10% contamination	marine	d__Bacteria;p__Chloroflexota;c__Dehalococcoidia;o__SZUA-161;f__E44-bin15;g__;s__	183	500310	0	0.16	0	0.16	47.88	15	41.304
N6_265	<50% completeness AND/OR >10% contamination	high salt	d__Bacteria;p__Chloroflexota;c__Dehalococcoidia;o__SZUA-161;f__E44-bin15;g__;s__	259	549420	0.278475	1.88	0	1.88	16.77	10	15.416
W60_153	<50% completeness AND/OR >10% contamination	water	d__Bacteria;p__Chloroflexota;c__Dehalococcoidia;o__SZUA-161;f__E44-bin15;g__;s__	146	280570	0	1.1	12.5	0.9625	29.94	20	27.952
W60_162	<50% completeness AND/OR >10% contamination	water	d__Bacteria;p__Chloroflexota;c__Dehalococcoidia;o__SZUA-161;f__E44-bin15;g__;s__	218	466910	0	8.45	0	8.45	30.17	15	27.136
W60_176	<50% completeness AND/OR >10% contamination	water	d__Bacteria;p__Chloroflexota;c__Dehalococcoidia;o__SZUA-161;f__E44-bin15;g__;s__	196	547610	0	11.21	37.5	7.00625	46.79	30	43.432
W60_177	<50% completeness AND/OR >10% contamination	water	d__Bacteria;p__Chloroflexota;c__Dehalococcoidia;o__SZUA-161;f__E44-bin15;g__;s__	86	225390	0	5.02	16.67	4.18317	28.59	10	24.872
W61_195	<50% completeness AND/OR >10% contamination	water	d__Bacteria;p__Chloroflexota;c__Dehalococcoidia;o__SZUA-161;f__E44-bin15;g__;s__	265	980580	0	14.26	0	14.26	61.21	40	56.968
W92_282	<50% completeness AND/OR >10% contamination	water	d__Bacteria;p__Chloroflexota;c__Dehalococcoidia;o__SZUA-161;f__E44-bin15;g__;s__	159	375670	0	0.16	100	0	29.56	5	24.648
N5_252	<50% completeness AND/OR >10% contamination	high salt	d__Bacteria;p__Chloroflexota;c__Dehalococcoidia;o__SZUA-161;f__E44-bin15;g__E29-bin15;s__	390	1061770	0	1.72	0	1.72	51.18	20	44.944
W60_171	<50% completeness AND/OR >10% contamination	water	d__Bacteria;p__Chloroflexota;c__Dehalococcoidia;o__SZUA-161;f__E44-bin15;g__E44-bin26;s__	107	369760	0	0.47	100	0	33.34	20	30.672
M48_142	<50% completeness AND/OR >10% contamination	marine	d__Bacteria;p__Chloroflexota;c__Dehalococcoidia;o__SZUA-161;f__E44-bin15;g__JAAXQM01;s__	318	632340	0	8.62	14.29	7.3882	37.4	5	30.92
M30_69	<50% completeness AND/OR >10% contamination	marine	d__Bacteria;p__Chloroflexota;c__Dehalococcoidia;o__SZUA-161;f__SpSt-899;g__;s__	130	439980	0	1.72	100	0	51.39	20	45.112
M46_141	<50% completeness AND/OR >10% contamination	marine	d__Bacteria;p__Chloroflexota;c__Dehalococcoidia;o__SZUA-161;f__SpSt-899;g__;s__	143	346890	0	0.16	0	0.16	43.97	5	36.176
N5_239	<50% completeness AND/OR >10% contamination	high salt	d__Bacteria;p__Chloroflexota;c__Dehalococcoidia;o__SZUA-161;f__SpSt-899;g__JABMQN01;s__	338	907960	0	0	0	0	45.45	30	42.36
H21_294	<50% completeness AND/OR >10% contamination	hotsprings	d__Bacteria;p__Chloroflexota;c__Dehalococcoidia;o__SZUA-161;f__SpSt-899;g__SpSt-899;s__SpSt-899 sp011358905	296	632020	0	0	0	0	30.66	35	31.528
W60_158	<50% completeness AND/OR >10% contamination	water	d__Bacteria;p__Chloroflexota;c__Dehalococcoidia;o__SZUA-161;f__SZUA-161;g__;s__	305	660060	0	7.29	7.14	6.76949	45.09	30	42.072
W79_247	<50% completeness AND/OR >10% contamination	water	d__Bacteria;p__Chloroflexota;c__Dehalococcoidia;o__SZUA-161;f__SZUA-161;g__;s__	493	955050	1.06068	8.78	28.57	6.27155	43.34	20	38.672
M58_213	<50% completeness AND/OR >10% contamination	marine	d__Bacteria;p__Chloroflexota;c__Dehalococcoidia;o__SZUA-161;f__SZUA-161;g__SZUA-161;s__	346	907330	0	10.5	28.57	7.50015	40.24	30	38.192
M62_283	<50% completeness AND/OR >10% contamination	marine	d__Bacteria;p__Chloroflexota;c__Dehalococcoidia;o__SZUA-161;f__SZUA-161;g__SZUA-161;s__	378	1235780	0	6.21	14.29	5.32259	41.14	30	38.912
M62_287	<50% completeness AND/OR >10% contamination	marine	d__Bacteria;p__Chloroflexota;c__Dehalococcoidia;o__SZUA-161;f__SZUA-161;g__SZUA-161;s__	304	660140	0.557458	4.39	0	4.39	28.73	0	22.984
M9_318	<50% completeness AND/OR >10% contamination	marine	d__Bacteria;p__Chloroflexota;c__Dehalococcoidia;o__SZUA-161;f__SZUA-161;g__SZUA-161;s__	240	651990	0	6.58	56.25	2.87875	36.41	20	33.128
N12_27	<50% completeness AND/OR >10% contamination	high salt	d__Bacteria;p__Chloroflexota;c__Dehalococcoidia;o__SZUA-161;f__SZUA-161;g__SZUA-161;s__	441	1185480	0	11.44	81.25	2.145	44.47	35	42.576
W60_159	<50% completeness AND/OR >10% contamination	water	d__Bacteria;p__Chloroflexota;c__Dehalococcoidia;o__SZUA-161;f__SZUA-161;g__SZUA-161;s__	364	871830	0	2.59	50	1.295	22.88	15	21.304
S11_61	<50% completeness AND/OR >10% contamination	corals/sponges	d__Bacteria;p__Chloroflexota;c__Dehalococcoidia;o__UBA1127;f__;g__;s__	232	669640	0	1.72	0	1.72	25.86	10	22.688
S1_6	<50% completeness AND/OR >10% contamination	corals/sponges	d__Bacteria;p__Chloroflexota;c__Dehalococcoidia;o__UBA1127;f__UBA1127;g__UBA1127;s__	335	929490	0	12.96	20	10.368	50.8	30	46.64
S38_301	<50% completeness AND/OR >10% contamination	corals/sponges	d__Bacteria;p__Chloroflexota;c__Dehalococcoidia;o__UBA1127;f__UBA1127;g__UBA1127;s__	204	531710	0	0	0	0	29.89	5	24.912
S31_226	<50% completeness AND/OR >10% contamination	corals/sponges	d__Bacteria;p__Chloroflexota;c__Dehalococcoidia;o__UBA1151;f__Bin127;g__Bin127;s__	379	940440	0	0	0	0	48.79	45	48.032
S5_328	<50% completeness AND/OR >10% contamination	corals/sponges	d__Bacteria;p__Chloroflexota;c__Dehalococcoidia;o__UBA1151;f__Bin127;g__Bin127;s__	123	898170	0	0	0	0	26.72	35	28.376
M58_229	<50% completeness AND/OR >10% contamination	marine	d__Bacteria;p__Chloroflexota;c__Dehalococcoidia;o__UBA2777;f__RBG-13-53-26;g__;s__	165	513840	0	8.62	100	0	36.76	10	31.408
M62_267	<50% completeness AND/OR >10% contamination	marine	d__Bacteria;p__Chloroflexota;c__Dehalococcoidia;o__UBA2777;f__RBG-13-53-26;g__;s__	1611	3339410	0	13.37	0	13.37	44.98	60	47.984
W60_161	<50% completeness AND/OR >10% contamination	water	d__Bacteria;p__Chloroflexota;c__Dehalococcoidia;o__UBA2777;f__RBG-13-53-26;g__;s__	624	1537480	0	15.52	30.77	10.7445	36.83	15	32.464
W61_196	<50% completeness AND/OR >10% contamination	water	d__Bacteria;p__Chloroflexota;c__Dehalococcoidia;o__UBA2777;f__RBG-13-53-26;g__;s__	272	680700	0	3.45	0	3.45	35.56	35	35.448
W7_226	<50% completeness AND/OR >10% contamination	water	d__Bacteria;p__Chloroflexota;c__Dehalococcoidia;o__UBA2777;f__RBG-13-53-26;g__;s__	798	1578990	0	2.04	0	2.04	28.06	40	30.448
W73_239	<50% completeness AND/OR >10% contamination	water	d__Bacteria;p__Chloroflexota;c__Dehalococcoidia;o__UBA2777;f__RBG-13-53-26;g__;s__	547	1230640	0	4.89	0	4.89	33.12	45	35.496
W92_260	<50% completeness AND/OR >10% contamination	water	d__Bacteria;p__Chloroflexota;c__Dehalococcoidia;o__UBA2777;f__RBG-13-53-26;g__;s__	424	1095240	0	0.34	0	0.34	47.26	15	40.808
R125_56	<50% completeness AND/OR >10% contamination	bioreactor	d__Bacteria;p__Chloroflexota;c__Dehalococcoidia;o__UBA2777;f__RBG-13-53-26;g__RBG-13-53-26;s__	416	1027010	0	0	0	0	40.99	10	34.792
H20_230	<50% completeness AND/OR >10% contamination	hotsprings	d__Bacteria;p__Chloroflexota;c__Dehalococcoidia;o__UBA2963;f__;g__;s__	399	859710	0	4.42	14.29	3.78838	37.46	25	34.968
H20_234	<50% completeness AND/OR >10% contamination	hotsprings	d__Bacteria;p__Chloroflexota;c__Dehalococcoidia;o__UBA2963;f__;g__;s__	455	914400	0	8.62	14.29	7.3882	42.85	15	37.28
S1_31	<50% completeness AND/OR >10% contamination	corals/sponges	d__Bacteria;p__Chloroflexota;c__Dehalococcoidia;o__UBA2963;f__UBA2963;g__;s__	195	491260	0	6.9	0	6.9	24.53	25	24.624
S1_2	<50% completeness AND/OR >10% contamination	corals/sponges	d__Bacteria;p__Chloroflexota;c__Dehalococcoidia;o__UBA2963;f__UBA2963;g__Bin16;s__	465	1144800	0	12.01	20.83	9.50832	52.12	20	45.696
S7_345	<50% completeness AND/OR >10% contamination	corals/sponges	d__Bacteria;p__Chloroflexota;c__Dehalococcoidia;o__UBA2963;f__UBA2963;g__Bin16;s__	161	1788150	0	3.45	0	3.45	31.35	55	36.08
S1_33	<50% completeness AND/OR >10% contamination	corals/sponges	d__Bacteria;p__Chloroflexota;c__Dehalococcoidia;o__UBA2979;f__UBA2979;g__;s__	446	1037960	0	7.29	23.53	5.57466	37.38	25	34.904
S12_78	<50% completeness AND/OR >10% contamination	corals/sponges	d__Bacteria;p__Chloroflexota;c__Dehalococcoidia;o__UBA2979;f__UBA2979;g__VXMT01;s__	442	1283040	0	2.04	0	2.04	40.33	45	41.264
S21_138	<50% completeness AND/OR >10% contamination	corals/sponges	d__Bacteria;p__Chloroflexota;c__Dehalococcoidia;o__UBA2979;f__UBA2979;g__VXMT01;s__	432	1007600	0	0.31	0	0.31	48.04	20	42.432
S26_176	<50% completeness AND/OR >10% contamination	corals/sponges	d__Bacteria;p__Chloroflexota;c__Dehalococcoidia;o__UBA2979;f__UBA2979;g__VXMT01;s__	470	1232710	0	2.61	100	0	56.74	20	49.392
S32_248	<50% completeness AND/OR >10% contamination	corals/sponges	d__Bacteria;p__Chloroflexota;c__Dehalococcoidia;o__UBA2979;f__UBA2979;g__VXMT01;s__	340	697260	0	0.16	100	0	28.03	40	30.424
S38_300	<50% completeness AND/OR >10% contamination	corals/sponges	d__Bacteria;p__Chloroflexota;c__Dehalococcoidia;o__UBA2979;f__UBA2979;g__VXMT01;s__	385	1016290	0	1.72	100	0	27.17	45	30.736
S8_396	<50% completeness AND/OR >10% contamination	corals/sponges	d__Bacteria;p__Chloroflexota;c__Dehalococcoidia;o__UBA2979;f__UBA2979;g__VXMT01;s__	575	1347020	0	1.72	100	0	46.19	35	43.952
S26_180	<50% completeness AND/OR >10% contamination	corals/sponges	d__Bacteria;p__Chloroflexota;c__Dehalococcoidia;o__UBA2979;f__UBA2979;g__VXMT01;s__VXMT01 sp009840965	372	760700	0	1.72	100	0	26.99	20	25.592
S34_267	<50% completeness AND/OR >10% contamination	corals/sponges	d__Bacteria;p__Chloroflexota;c__Dehalococcoidia;o__UBA2979;f__UBA2979;g__VYDC01;s__	60	731870	0	0	0	0	27.59	40	30.072
B32_93	<50% completeness AND/OR >10% contamination	soil	d__Bacteria;p__Chloroflexota;c__Dehalococcoidia;o__UBA2991;f__UBA2991;g__;s__	404	1043010	0	0	0	0	32.84	0	26.272
R830_253	<50% completeness AND/OR >10% contamination	bioreactor	d__Bacteria;p__Chloroflexota;c__Dehalococcoidia;o__UBA2991;f__UBA2991;g__;s__	205	734430	0	5.17	100	0	34.87	30	33.896
R95_321	<50% completeness AND/OR >10% contamination	bioreactor	d__Bacteria;p__Chloroflexota;c__Dehalococcoidia;o__UBA2991;f__UBA2991;g__;s__	305	876790	0	0	0	0	29.14	25	28.312
F3_96	<50% completeness AND/OR >10% contamination	microbial mats	d__Bacteria;p__Chloroflexota;c__Dehalococcoidia;o__UBA2991;f__UBA2991;g__FeB-14;s__	667	1562650	0	6.9	66.67	2.29977	33.95	35	34.16
B104_4	<50% completeness AND/OR >10% contamination	soil	d__Bacteria;p__Chloroflexota;c__Dehalococcoidia;o__UBA2991;f__UBA2991;g__PNKC01;s__	785	1638220	0	8.31	50	4.155	38.03	40	38.424
R118_46	<50% completeness AND/OR >10% contamination	bioreactor	d__Bacteria;p__Chloroflexota;c__Dehalococcoidia;o__UBA2991;f__UBA2991;g__PNKC01;s__	751	2312440	0	4.08	50	2.04	39.44	30	37.552
R89_290	<50% completeness AND/OR >10% contamination	bioreactor	d__Bacteria;p__Chloroflexota;c__Dehalococcoidia;o__UBA2991;f__UBA2991;g__PNKC01;s__	405	880050	0	0	0	0	18.71	25	19.968
H33_441	<50% completeness AND/OR >10% contamination	hotsprings	d__Bacteria;p__Chloroflexota;c__Dehalococcoidia;o__UBA2991;f__UBA2991;g__Tepidiforma;s__Tepidiforma bonchosmolovskayae	364	874420	0	0	0	0	42.16	55	44.728
S32_246	<50% completeness AND/OR >10% contamination	corals/sponges	d__Bacteria;p__Chloroflexota;c__Dehalococcoidia;o__UBA2991;f__UBA2991;g__UBA2991;s__	372	1094680	0	0	0	0	25.78	25	25.624
S7_332	<50% completeness AND/OR >10% contamination	corals/sponges	d__Bacteria;p__Chloroflexota;c__Dehalococcoidia;o__UBA2991;f__UBA2991;g__UBA2991;s__	251	754530	0	0	0	0	20.27	20	20.216
M52_178	<50% completeness AND/OR >10% contamination	marine	d__Bacteria;p__Chloroflexota;c__Dehalococcoidia;o__UBA2991;f__UBA2991;g__UCB2;s__	409	1093190	0	2.59	0	2.59	36.29	25	34.032
R830_252	<50% completeness AND/OR >10% contamination	bioreactor	d__Bacteria;p__Chloroflexota;c__Dehalococcoidia;o__UBA2991;f__UBA2991;g__UCB2;s__	187	679070	0	5.49	84	0.8784	47.41	30	43.928
H21_293	<50% completeness AND/OR >10% contamination	hotsprings	d__Bacteria;p__Chloroflexota;c__Dehalococcoidia;o__UBA3495;f__;g__;s__	361	869100	0	0.16	0	0.16	34.48	20	31.584
M30_47	<50% completeness AND/OR >10% contamination	marine	d__Bacteria;p__Chloroflexota;c__Dehalococcoidia;o__UBA3495;f__;g__;s__	327	754060	0	1.72	100	0	54.78	25	48.824
S1_3	<50% completeness AND/OR >10% contamination	corals/sponges	d__Bacteria;p__Chloroflexota;c__Dehalococcoidia;o__UBA3495;f__;g__;s__	241	1607990	0	0.47	33.33	0.313349	22.41	55	28.928
S1_4	<50% completeness AND/OR >10% contamination	corals/sponges	d__Bacteria;p__Chloroflexota;c__Dehalococcoidia;o__UBA3495;f__;g__;s__	502	1149870	0	0	0	0	41.87	35	40.496
S1_47	<50% completeness AND/OR >10% contamination	corals/sponges	d__Bacteria;p__Chloroflexota;c__Dehalococcoidia;o__UBA3495;f__;g__;s__	1421	3863350	0	17.63	32	11.9884	43.65	65	47.92
S18_110	<50% completeness AND/OR >10% contamination	corals/sponges	d__Bacteria;p__Chloroflexota;c__Dehalococcoidia;o__UBA3495;f__;g__;s__	391	818760	0	0	0	0	23.73	50	28.984
S8_377	<50% completeness AND/OR >10% contamination	corals/sponges	d__Bacteria;p__Chloroflexota;c__Dehalococcoidia;o__UBA3495;f__;g__;s__	343	839260	0	1.72	0	1.72	47.85	20	42.28
W25_41	<50% completeness AND/OR >10% contamination	water	d__Bacteria;p__Chloroflexota;c__Dehalococcoidia;o__UBA3495;f__;g__;s__	366	765490	0	0	0	0	23.43	25	23.744
W60_145	<50% completeness AND/OR >10% contamination	water	d__Bacteria;p__Chloroflexota;c__Dehalococcoidia;o__UBA3495;f__;g__;s__	219	486060	0	0.16	100	0	43.95	35	42.16
S11_60	<50% completeness AND/OR >10% contamination	corals/sponges	d__Bacteria;p__Chloroflexota;c__Dehalococcoidia;o__UBA3495;f__GCA-2712585;g__;s__	392	1300720	0	1.72	0	1.72	52.35	35	48.88
H20_233	<50% completeness AND/OR >10% contamination	hotsprings	d__Bacteria;p__Chloroflexota;c__Dehalococcoidia;o__UBA3495;f__JAAXIE01;g__;s__	585	3655670	0	11.66	8.33	10.6887	97.41	95	96.928
S1_42	<50% completeness AND/OR >10% contamination	corals/sponges	d__Bacteria;p__Chloroflexota;c__Dehalococcoidia;o__UBA3495;f__JAAXIE01;g__JAAXIE01;s__	446	1259180	0	0	0	0	46.07	45	45.856
S7_361	<50% completeness AND/OR >10% contamination	corals/sponges	d__Bacteria;p__Chloroflexota;c__Dehalococcoidia;o__UBA3495;f__JAAXIE01;g__JAAXIE01;s__	385	1003570	0	0	0	0	37.45	30	35.96
H20_235	<50% completeness AND/OR >10% contamination	hotsprings	d__Bacteria;p__Chloroflexota;c__Dehalococcoidia;o__UBA3495;f__UBA3495;g__;s__	1096	2263530	0	19.78	10.53	17.6972	53.68	35	49.944
S1_18	<50% completeness AND/OR >10% contamination	corals/sponges	d__Bacteria;p__Chloroflexota;c__Dehalococcoidia;o__UBA3495;f__UBA3495;g__;s__	1345	4124620	0	16.25	21.43	12.7676	55.77	55	55.616
S8_390	<50% completeness AND/OR >10% contamination	corals/sponges	d__Bacteria;p__Chloroflexota;c__Dehalococcoidia;o__UBA3495;f__UBA3495;g__;s__	447	1731030	0	5.33	20	4.264	29.47	50	33.576
S32_234	<50% completeness AND/OR >10% contamination	corals/sponges	d__Bacteria;p__Chloroflexota;c__Dehalococcoidia;o__UBA3495;f__UBA3495;g__Bin87;s__	2187	6527550	0	6.61	71.43	1.88848	31.66	60	37.328
S8_370	<50% completeness AND/OR >10% contamination	corals/sponges	d__Bacteria;p__Chloroflexota;c__Dehalococcoidia;o__UBA3495;f__UBA3495;g__Bin87;s__	708	2035450	0	6.9	100	0	37.97	25	35.376
S1_26	<50% completeness AND/OR >10% contamination	corals/sponges	d__Bacteria;p__Chloroflexota;c__Dehalococcoidia;o__UBA3495;f__UBA3495;g__GCA-2707185;s__	559	1485820	0	5.17	75	1.2925	50.63	40	48.504
S1_35	<50% completeness AND/OR >10% contamination	corals/sponges	d__Bacteria;p__Chloroflexota;c__Dehalococcoidia;o__UBA3495;f__UBA3495;g__GCA-2707185;s__	852	2271650	0	14.94	18.18	12.2239	50.55	45	49.44
S1_9	<50% completeness AND/OR >10% contamination	corals/sponges	d__Bacteria;p__Chloroflexota;c__Dehalococcoidia;o__UBA3495;f__UBA3495;g__GCA-2707185;s__	440	3786740	0	12.07	12.5	10.5613	69.59	85	72.672
S11_74	<50% completeness AND/OR >10% contamination	corals/sponges	d__Bacteria;p__Chloroflexota;c__Dehalococcoidia;o__UBA3495;f__UBA3495;g__GCA-2707185;s__	186	1099250	0	1.72	100	0	28.37	55	33.696
S1_38	<50% completeness AND/OR >10% contamination	corals/sponges	d__Bacteria;p__Chloroflexota;c__Dehalococcoidia;o__UBA3495;f__UBA3495;g__Io17-Chloro-G2;s__	771	2.06811e+06	0.0899372	2.74	0	2.74	31.19	45	33.952
S11_70	<50% completeness AND/OR >10% contamination	corals/sponges	d__Bacteria;p__Chloroflexota;c__Dehalococcoidia;o__UBA3495;f__UBA3495;g__UBA11650;s__	1451	6416620	0	14.66	0	14.66	91.22	85	89.976
S32_238	<50% completeness AND/OR >10% contamination	corals/sponges	d__Bacteria;p__Chloroflexota;c__Dehalococcoidia;o__UBA3495;f__UBA3495;g__UBA11650;s__	397	1560480	0	0.31	0	0.31	23.67	65	31.936
S32_231	<50% completeness AND/OR >10% contamination	corals/sponges	d__Bacteria;p__Chloroflexota;c__Dehalococcoidia;o__UBA3495;f__UBA3495;g__VXOI01;s__	835	4079200	0	6.9	20	5.52	30.34	75	39.272
S34_271	<50% completeness AND/OR >10% contamination	corals/sponges	d__Bacteria;p__Chloroflexota;c__Dehalococcoidia;o__UBA3495;f__UBA3495;g__VXOI01;s__	186	947780	0	1.72	100	0	34.8	45	36.84
S34_273	<50% completeness AND/OR >10% contamination	corals/sponges	d__Bacteria;p__Chloroflexota;c__Dehalococcoidia;o__UBA3495;f__UBA3495;g__VXOI01;s__	691	2209610	0	1.72	100	0	45.66	65	49.528
S5_325	<50% completeness AND/OR >10% contamination	corals/sponges	d__Bacteria;p__Chloroflexota;c__Dehalococcoidia;o__UBA3495;f__UBA3495;g__VXOI01;s__	531	1360520	0	5.17	0	5.17	35.34	55	39.272
S5_326	<50% completeness AND/OR >10% contamination	corals/sponges	d__Bacteria;p__Chloroflexota;c__Dehalococcoidia;o__UBA3495;f__UBA3495;g__VXOI01;s__	543	1400060	0	5.83	14.29	4.99689	30.45	35	31.36
S8_397	<50% completeness AND/OR >10% contamination	corals/sponges	d__Bacteria;p__Chloroflexota;c__Dehalococcoidia;o__UBA3495;f__UBA3495;g__VXOI01;s__	549	1992190	0	0.16	100	0	52.35	40	49.88
H68_706	<50% completeness AND/OR >10% contamination	hotsprings	d__Bacteria;p__Chloroflexota;c__DTOL01;o__DTOL01;f__;g__;s__	423	990370	0	0	0	0	47.1	20	41.68
M52_182	<50% completeness AND/OR >10% contamination	marine	d__Bacteria;p__Chloroflexota;c__DTOL01;o__DTOL01;f__DTOL01;g__;s__	561	1702950	0	0	0	0	43.18	15	37.544
B73_148	<50% completeness AND/OR >10% contamination	soil	d__Bacteria;p__Chloroflexota;c__Ellin6529;o__CSP1-4;f__CSP1-4;g__;s__	626	1791010	0	1.88	100	0	46.16	60	48.928
B77_158	<50% completeness AND/OR >10% contamination	soil	d__Bacteria;p__Chloroflexota;c__Ellin6529;o__CSP1-4;f__CSP1-4;g__;s__	708	1436430	0	17.24	27.27	12.5387	44.59	10	37.672
H103_19	<50% completeness AND/OR >10% contamination	hotsprings	d__Bacteria;p__Chloroflexota;c__Ellin6529;o__CSP1-4;f__CSP1-4;g__;s__	656	1817450	0	0	0	0	26.1	30	26.88
M39_82	<50% completeness AND/OR >10% contamination	marine	d__Bacteria;p__Chloroflexota;c__Ellin6529;o__CSP1-4;f__CSP1-4;g__;s__	586	1190300	0	4.6	50	2.3	27.3	25	26.84
W100_4	<50% completeness AND/OR >10% contamination	water	d__Bacteria;p__Chloroflexota;c__Ellin6529;o__CSP1-4;f__CSP1-4;g__;s__	1252	2981610	0	5.17	0	5.17	48.67	35	45.936
B30_74	<50% completeness AND/OR >10% contamination	soil	d__Bacteria;p__Chloroflexota;c__Ellin6529;o__CSP1-4;f__CSP1-4;g__C-114;s__	583	1937430	0	0	0	0	51.88	30	47.504
R95_325	<50% completeness AND/OR >10% contamination	bioreactor	d__Bacteria;p__Chloroflexota;c__Ellin6529;o__CSP1-4;f__CSP1-4;g__CAIXZV01;s__	526	1177080	0	2.59	25	1.9425	26.72	25	26.376
N5_264	<50% completeness AND/OR >10% contamination	high salt	d__Bacteria;p__Chloroflexota;c__Ellin6529;o__CSP1-4;f__CSP1-4;g__Fen-1039;s__	382	880070	0	0	0	0	29.94	20	27.952
F11_6	<50% completeness AND/OR >10% contamination	microbial mats	d__Bacteria;p__Chloroflexota;c__Ellin6529;o__CSP1-4;f__CSP1-4;g__SPCO01;s__	894	2550560	0	13.79	44.44	7.66172	40.52	55	43.416
M48_147	<50% completeness AND/OR >10% contamination	marine	d__Bacteria;p__Chloroflexota;c__Ellin6529;o__CSP1-4;f__CSP1-4;g__SPCO01;s__SPCO01 sp004525275	235	966770	0	0	0	0	26.18	40	28.944
W101_20	<50% completeness AND/OR >10% contamination	water	d__Bacteria;p__Chloroflexota;c__Ellin6529;o__CSP1-4;f__UBA10416;g__UBA10416;s__	138	314770	0	0.31	50	0.155	40.28	20	36.224
W39_85	<50% completeness AND/OR >10% contamination	water	d__Bacteria;p__Chloroflexota;c__Ellin6529;o__CSP1-4;f__UBA10416;g__UBA10416;s__	363	802170	0	16.38	90.91	1.48894	40.94	35	39.752
W101_17	<50% completeness AND/OR >10% contamination	water	d__Bacteria;p__Chloroflexota;c__Ellin6529;o__CSP1-4;f__UBA10416;g__UBA10416;s__UBA10416 sp903820655	225	507480	0	1.97	55.56	0.875468	36.99	35	36.592
B11_6	<50% completeness AND/OR >10% contamination	soil	d__Bacteria;p__Chloroflexota;c__Ellin6529;o__P2-11E;f__P2-11E;g__CF-39;s__CF-39 sp005882255	338	1091990	0	0	0	0	34.56	20	31.648
N6_282	<50% completeness AND/OR >10% contamination	high salt	d__Bacteria;p__Chloroflexota;c__Ellin6529;o__QHBO01;f__QHBO01;g__;s__	367	833870	0	0	0	0	45.03	20	40.024
B89_185	<50% completeness AND/OR >10% contamination	soil	d__Bacteria;p__Chloroflexota;c__FW602-bin22;o__FW602-bin22;f__CADDYW01;g__;s__	541	1251610	0	1.15	0	1.15	34.87	15	30.896
H111_89	<50% completeness AND/OR >10% contamination	hotsprings	d__Bacteria;p__Chloroflexota;c__FW602-bin22;o__FW602-bin22;f__CADDYW01;g__;s__	482	1051240	0.668734	1.72	0	1.72	21.26	0	17.008
B61_132	<50% completeness AND/OR >10% contamination	soil	d__Bacteria;p__Chloroflexota;c__Ktedonobacteria;o__Ktedonobacterales;f__;g__;s__	729	1493570	0	1.88	50	0.94	39.34	5	32.472
B111_25	<50% completeness AND/OR >10% contamination	soil	d__Bacteria;p__Chloroflexota;c__Ktedonobacteria;o__Ktedonobacterales;f__JACDGC01;g__;s__	1227	2465140	0.0786974	6.03	0	6.03	42.82	30	40.256
B38_103	<50% completeness AND/OR >10% contamination	soil	d__Bacteria;p__Chloroflexota;c__Ktedonobacteria;o__Ktedonobacterales;f__JACDGC01;g__;s__	949	2130300	0	5.6	70	1.68	45.43	15	39.344
B11_5	<50% completeness AND/OR >10% contamination	soil	d__Bacteria;p__Chloroflexota;c__Ktedonobacteria;o__Ktedonobacterales;f__Ktedonobacteraceae;g__;s__	1556	3718680	0.0422193	13.62	58.33	5.67545	38.4	30	36.72
B111_32	<50% completeness AND/OR >10% contamination	soil	d__Bacteria;p__Chloroflexota;c__Ktedonobacteria;o__Ktedonobacterales;f__Ktedonobacteraceae;g__;s__	972	3817430	0.185465	8.71	31.25	5.98813	47.34	30	43.872
B111_36	<50% completeness AND/OR >10% contamination	soil	d__Bacteria;p__Chloroflexota;c__Ktedonobacteria;o__Ktedonobacterales;f__Ktedonobacteraceae;g__;s__	463	1451450	0.180509	5.33	80	1.066	41.54	20	37.232
B30_80	<50% completeness AND/OR >10% contamination	soil	d__Bacteria;p__Chloroflexota;c__Ktedonobacteria;o__Ktedonobacterales;f__Ktedonobacteraceae;g__;s__	2485	1.64771e+07	0.0941912	12.93	11.11	11.4935	92.95	90	92.36
B38_100	<50% completeness AND/OR >10% contamination	soil	d__Bacteria;p__Chloroflexota;c__Ktedonobacteria;o__Ktedonobacterales;f__Ktedonobacteraceae;g__;s__	1351	3619710	0.556398	8.62	57.14	3.69453	46.61	15	40.288
B38_101	<50% completeness AND/OR >10% contamination	soil	d__Bacteria;p__Chloroflexota;c__Ktedonobacteria;o__Ktedonobacterales;f__Ktedonobacteraceae;g__;s__	427	1191390	0	1.72	50	0.86	26.12	45	29.896
B43_106	<50% completeness AND/OR >10% contamination	soil	d__Bacteria;p__Chloroflexota;c__Ktedonobacteria;o__Ktedonobacterales;f__Ktedonobacteraceae;g__;s__	1468	3075340	0.187622	3.45	0	3.45	25.42	25	25.336
B61_131	<50% completeness AND/OR >10% contamination	soil	d__Bacteria;p__Chloroflexota;c__Ktedonobacteria;o__Ktedonobacterales;f__Ktedonobacteraceae;g__;s__	2617	5512950	0.061673	6.03	25	4.5225	26.8	45	30.44
B61_134	<50% completeness AND/OR >10% contamination	soil	d__Bacteria;p__Chloroflexota;c__Ktedonobacteria;o__Ktedonobacterales;f__Ktedonobacteraceae;g__;s__	2927	6513690	0.0551147	5.33	20	4.264	24.33	20	23.464
B61_136	<50% completeness AND/OR >10% contamination	soil	d__Bacteria;p__Chloroflexota;c__Ktedonobacteria;o__Ktedonobacterales;f__Ktedonobacteraceae;g__;s__	2026	6563730	0.149305	13.57	33.33	9.04712	46.47	40	45.176
B61_141	<50% completeness AND/OR >10% contamination	soil	d__Bacteria;p__Chloroflexota;c__Ktedonobacteria;o__Ktedonobacterales;f__Ktedonobacteraceae;g__;s__	855	2838440	0.313553	4.31	33.33	2.87348	43.57	35	41.856
B8_162	<50% completeness AND/OR >10% contamination	soil	d__Bacteria;p__Chloroflexota;c__Ktedonobacteria;o__Ktedonobacterales;f__Ktedonobacteraceae;g__;s__	1538	4035410	0.239876	13.79	42.31	7.95545	37.69	30	36.152
B11_12	<50% completeness AND/OR >10% contamination	soil	d__Bacteria;p__Chloroflexota;c__Ktedonobacteria;o__Ktedonobacterales;f__Ktedonobacteraceae;g__CADDZH01;s__	2392	6750630	0.272271	17.57	12	15.4616	57.05	40	53.64
B61_140	<50% completeness AND/OR >10% contamination	soil	d__Bacteria;p__Chloroflexota;c__Ktedonobacteria;o__Ktedonobacterales;f__Ktedonobacteraceae;g__CADDZH01;s__	7893	19537140	0.0464244	8.93	55.56	3.96849	36.72	45	38.376
B8_161	<50% completeness AND/OR >10% contamination	soil	d__Bacteria;p__Chloroflexota;c__Ktedonobacteria;o__Ktedonobacterales;f__Ktedonobacteraceae;g__CADDZH01;s__	2556	5033830	0.259047	10.27	21.74	8.0373	36.83	20	33.464
B11_13	<50% completeness AND/OR >10% contamination	soil	d__Bacteria;p__Chloroflexota;c__Ktedonobacteria;o__Ktedonobacterales;f__Ktedonobacteraceae;g__CF-113;s__	1607	3953390	0.236506	12.51	28.57	8.93589	42.01	35	40.608
B111_23	<50% completeness AND/OR >10% contamination	soil	d__Bacteria;p__Chloroflexota;c__Ktedonobacteria;o__Ktedonobacterales;f__Ktedonobacteraceae;g__CF-113;s__	4518	10429840	0.0970293	7.21	8.33	6.60941	34.64	20	31.712
B111_26	<50% completeness AND/OR >10% contamination	soil	d__Bacteria;p__Chloroflexota;c__Ktedonobacteria;o__Ktedonobacterales;f__Ktedonobacteraceae;g__CF-113;s__	1579	3951670	0.100717	2.87	66.67	0.956571	43.79	50	45.032
B111_27	<50% completeness AND/OR >10% contamination	soil	d__Bacteria;p__Chloroflexota;c__Ktedonobacteria;o__Ktedonobacterales;f__Ktedonobacteraceae;g__CF-113;s__	1599	3825990	0.0426034	4.6	0	4.6	40.58	35	39.464
B38_98	<50% completeness AND/OR >10% contamination	soil	d__Bacteria;p__Chloroflexota;c__Ktedonobacteria;o__Ktedonobacterales;f__Ktedonobacteraceae;g__CF-113;s__	750	1989980	0	4.95	44.44	2.75022	31.82	25	30.456
B4_104	<50% completeness AND/OR >10% contamination	soil	d__Bacteria;p__Chloroflexota;c__Ktedonobacteria;o__Ktedonobacterales;f__Ktedonobacteraceae;g__CF-113;s__	985	1941700	0.454241	14.25	33.33	9.50047	46.21	15	39.968
B6_129	<50% completeness AND/OR >10% contamination	soil	d__Bacteria;p__Chloroflexota;c__Ktedonobacteria;o__Ktedonobacterales;f__Ktedonobacteraceae;g__CF-113;s__	866	1827680	0	2.19	20	1.752	45.13	15	39.104
B61_137	<50% completeness AND/OR >10% contamination	soil	d__Bacteria;p__Chloroflexota;c__Ktedonobacteria;o__Ktedonobacterales;f__Ktedonobacteraceae;g__CF-113;s__	1050	3022400	0.496956	8.39	45.45	4.57675	57.11	20	49.688
B74_150	<50% completeness AND/OR >10% contamination	soil	d__Bacteria;p__Chloroflexota;c__Ktedonobacteria;o__Ktedonobacterales;f__Ktedonobacteraceae;g__CF-113;s__	857	1710250	0.497588	12.83	84.62	1.97325	56.22	20	48.976
B74_154	<50% completeness AND/OR >10% contamination	soil	d__Bacteria;p__Chloroflexota;c__Ktedonobacteria;o__Ktedonobacterales;f__Ktedonobacteraceae;g__CF-113;s__	1035	2340700	0.404153	1.72	100	0	30.55	30	30.44
B38_99	<50% completeness AND/OR >10% contamination	soil	d__Bacteria;p__Chloroflexota;c__Ktedonobacteria;o__Ktedonobacterales;f__Ktedonobacteraceae;g__Dictyobacter;s__	1411	3334310	0.124464	16.35	24.73	12.3066	32.99	10	28.392
B93_198	<50% completeness AND/OR >10% contamination	soil	d__Bacteria;p__Chloroflexota;c__Ktedonobacteria;o__Ktedonobacterales;f__Ktedonobacteraceae;g__Dictyobacter;s__	872	2984800	0.0559501	19.75	100	0	35.58	25	33.464
B93_199	<50% completeness AND/OR >10% contamination	soil	d__Bacteria;p__Chloroflexota;c__Ktedonobacteria;o__Ktedonobacterales;f__Ktedonobacteraceae;g__DTNP01;s__	699	1863350	0.377277	3.35	88.89	0.372185	37.29	10	31.832
B5_108	<50% completeness AND/OR >10% contamination	soil	d__Bacteria;p__Chloroflexota;c__Ktedonobacteria;o__Ktedonobacterales;f__Ktedonobacteraceae;g__Ktedonobacter;s__	626	1239390	0.477654	0	0	0	16.95	10	15.56
B93_192	<50% completeness AND/OR >10% contamination	soil	d__Bacteria;p__Chloroflexota;c__Ktedonobacteria;o__Ktedonobacterales;f__Ktedonobacteraceae;g__Tengunoibacter;s__	2250	5355860	0.138727	8.16	50	4.08	38.71	30	36.968
R72_195	<50% completeness AND/OR >10% contamination	bioreactor	d__Bacteria;p__Chloroflexota;c__Ktedonobacteria;o__Ktedonobacterales;f__Ktedonobacteraceae;g__Thermogemmatispora;s__Thermogemmatispora onikobensis	1278	3524130	0.754229	0	0	0	39.99	20	35.992
B11_10	<50% completeness AND/OR >10% contamination	soil	d__Bacteria;p__Chloroflexota;c__Ktedonobacteria;o__Ktedonobacterales;f__Ktedonobacteraceae;g__UBA11361;s__	815	1662350	0.587121	8.39	33.33	5.59361	35.25	5	29.2
B11_16	<50% completeness AND/OR >10% contamination	soil	d__Bacteria;p__Chloroflexota;c__Ktedonobacteria;o__Ktedonobacterales;f__Ktedonobacteraceae;g__UBA11361;s__	427	1331190	0.388374	0	0	0	35.56	15	31.448
B31_82	<50% completeness AND/OR >10% contamination	soil	d__Bacteria;p__Chloroflexota;c__Ktedonobacteria;o__Ktedonobacterales;f__Ktedonobacteraceae;g__UBA11361;s__	2735	5683540	0.0629889	0.5	0	0.5	20.55	25	21.44
B31_87	<50% completeness AND/OR >10% contamination	soil	d__Bacteria;p__Chloroflexota;c__Ktedonobacteria;o__Ktedonobacterales;f__Ktedonobacteraceae;g__UBA11361;s__	380	2787640	1.56871	8.62	16.67	7.18305	46.21	40	44.968
B74_151	<50% completeness AND/OR >10% contamination	soil	d__Bacteria;p__Chloroflexota;c__Ktedonobacteria;o__Ktedonobacterales;f__Ktedonobacteraceae;g__UBA11361;s__	2031	4557000	0	5.17	0	5.17	36.83	20	33.464
S1_13	<50% completeness AND/OR >10% contamination	corals/sponges	d__Bacteria;p__Chloroflexota;c__UBA11872;o__UBA11872;f__;g__;s__	406	963680	0	0	0	0	49.51	15	42.608
S1_8	<50% completeness AND/OR >10% contamination	corals/sponges	d__Bacteria;p__Chloroflexota;c__UBA11872;o__UBA11872;f__UBA11872;g__;s__	381	918510	0	0	0	0	38.32	15	33.656
S14_89	<50% completeness AND/OR >10% contamination	corals/sponges	d__Bacteria;p__Chloroflexota;c__UBA11872;o__UBA11872;f__UBA11872;g__;s__	435	1155410	0	1.72	100	0	24.69	20	23.752
S14_88	<50% completeness AND/OR >10% contamination	corals/sponges	d__Bacteria;p__Chloroflexota;c__UBA11872;o__UBA11872;f__UBA11872;g__UBA11872;s__	405	890680	0	0	0	0	28.06	20	26.448
S16_97	<50% completeness AND/OR >10% contamination	corals/sponges	d__Bacteria;p__Chloroflexota;c__UBA11872;o__UBA11872;f__UBA11872;g__UBA11872;s__	216	1157480	0	0.16	100	0	36.21	55	39.968
S4_306	<50% completeness AND/OR >10% contamination	corals/sponges	d__Bacteria;p__Chloroflexota;c__UBA11872;o__UBA11872;f__UBA11872;g__UBA11872;s__	776	2042630	0	13.13	14.29	11.2537	61.21	50	58.968
S29_212	<50% completeness AND/OR >10% contamination	corals/sponges	d__Bacteria;p__Chloroflexota;c__UBA11872;o__UBA11872;f__VXNJ01;g__VXNJ01;s__VXNJ01 sp009840625	261	532240	0	0	0	0	24.47	0	19.576
S7_358	<50% completeness AND/OR >10% contamination	corals/sponges	d__Bacteria;p__Chloroflexota;c__UBA11872;o__VXOZ01;f__VXOZ01;g__VXOZ01;s__	226	510150	31.0967	0	0	0	21.21	0	16.968
S29_207	<50% completeness AND/OR >10% contamination	corals/sponges	d__Bacteria;p__Chloroflexota;c__UBA2235;o__UBA12225;f__;g__;s__	711	1818410	0	0.16	0	0.16	52.59	10	44.072
B32_92	<50% completeness AND/OR >10% contamination	soil	d__Bacteria;p__Chloroflexota;c__UBA6077;o__UBA6077;f__;g__;s__	500	1168390	0	0	0	0	28.76	20	27.008
H17_188	<50% completeness AND/OR >10% contamination	hotsprings	d__Bacteria;p__Chloroflexota;c__UBA6077;o__UBA6077;f__;g__;s__	526	1190970	0	0	0	0	40.63	25	37.504
B30_71	<50% completeness AND/OR >10% contamination	soil	d__Bacteria;p__Chloroflexota;c__UBA6077;o__UBA6077;f__CF-72;g__;s__	1675	4379990	0	0.57	100	0	45.17	50	46.136
B88_176	<50% completeness AND/OR >10% contamination	soil	d__Bacteria;p__Chloroflexota;c__UBA6077;o__UBA6077;f__CF-72;g__CF-72;s__	318	2384790	0	1.72	0	1.72	40.3	55	43.24
H111_76	<50% completeness AND/OR >10% contamination	hotsprings	d__Bacteria;p__Chloroflexota;c__UBA6077;o__UBA6077;f__UBA6077;g__;s__	573	1313640	0	0	0	0	34.3	15	30.44
H111_91	<50% completeness AND/OR >10% contamination	hotsprings	d__Bacteria;p__Chloroflexota;c__UBA6077;o__UBA6077;f__UBA6077;g__;s__	481	1572180	0	1.72	0	1.72	47.26	35	44.808
H25_345	<50% completeness AND/OR >10% contamination	hotsprings	d__Bacteria;p__Chloroflexota;c__UBA6077;o__UBA6077;f__UBA6077;g__;s__	366	1061190	0	0.31	0	0.31	18.5	20	18.8
B74_152	<50% completeness AND/OR >10% contamination	soil	d__Bacteria;p__Dormibacterota;c__Dormibacteria;o__CF-121;f__CF-121;g__CF-121;s__	570	1132730	0	0	0	0	31.06	30	30.848
B74_153	<50% completeness AND/OR >10% contamination	soil	d__Bacteria;p__Dormibacterota;c__Dormibacteria;o__CF-121;f__CF-121;g__CF-13;s__	356	700700	0	1.97	90	0.197	39.89	10	33.912
B11_20	<50% completeness AND/OR >10% contamination	soil	d__Bacteria;p__Dormibacterota;c__Dormibacteria;o__CF-121;f__CF-121;g__CF-13;s__CF-13 sp005889395	323	949370	0	0.31	100	0	38.48	20	34.784
B93_194	<50% completeness AND/OR >10% contamination	soil	d__Bacteria;p__Dormibacterota;c__Dormibacteria;o__Dormibacterales;f__Dormibacteraceae;g__;s__	345	677390	0	0.78	60	0.312	15.69	15	15.552
B30_61	<50% completeness AND/OR >10% contamination	soil	d__Bacteria;p__Dormibacterota;c__Dormibacteria;o__Dormibacterales;f__Dormibacteraceae;g__40CM-4-65-16;s__	200	881810	0	1.69	83.33	0.281723	27.27	40	29.816
B31_81	<50% completeness AND/OR >10% contamination	soil	d__Bacteria;p__Dormibacterota;c__Dormibacteria;o__Dormibacterales;f__Dormibacteraceae;g__40CM-4-65-16;s__	826	1976330	0	0	0	0	21.47	55	28.176
B31_83	<50% completeness AND/OR >10% contamination	soil	d__Bacteria;p__Dormibacterota;c__Dormibacteria;o__Dormibacterales;f__Dormibacteraceae;g__40CM-4-65-16;s__	130	793480	0	0	0	0	34.76	30	33.808
B61_135	<50% completeness AND/OR >10% contamination	soil	d__Bacteria;p__Dormibacterota;c__Dormibacteria;o__Dormibacterales;f__Dormibacteraceae;g__40CM-4-65-16;s__	333	747010	0	0	0	0	25.31	0	20.248
B11_14	<50% completeness AND/OR >10% contamination	soil	d__Bacteria;p__Dormibacterota;c__Dormibacteria;o__Dormibacterales;f__Dormibacteraceae;g__CF-118;s__	686	1451380	0	0.16	100	0	26.68	10	23.344
B11_7	<50% completeness AND/OR >10% contamination	soil	d__Bacteria;p__Dormibacterota;c__Dormibacteria;o__Dormibacterales;f__Dormibacteraceae;g__CF-118;s__	261	1094950	0	6.9	75	1.725	28.84	55	34.072
B30_67	<50% completeness AND/OR >10% contamination	soil	d__Bacteria;p__Dormibacterota;c__Dormibacteria;o__Dormibacterales;f__Dormibacteraceae;g__CF-118;s__	282	839880	0	2.74	33.33	1.82676	44.45	15	38.56
B30_68	<50% completeness AND/OR >10% contamination	soil	d__Bacteria;p__Dormibacterota;c__Dormibacteria;o__Dormibacterales;f__Dormibacteraceae;g__CF-118;s__	289	692010	0	0.86	100	0	22.41	0	17.928
B30_69	<50% completeness AND/OR >10% contamination	soil	d__Bacteria;p__Dormibacterota;c__Dormibacteria;o__Dormibacterales;f__Dormibacteraceae;g__CF-118;s__	208	762830	0	0	0	0	29.92	15	26.936
B43_105	<50% completeness AND/OR >10% contamination	soil	d__Bacteria;p__Dormibacterota;c__Dormibacteria;o__Dormibacterales;f__Dormibacteraceae;g__CF-118;s__	603	1411380	0	3.45	50	1.725	20.69	15	19.552
B61_139	<50% completeness AND/OR >10% contamination	soil	d__Bacteria;p__Dormibacterota;c__Dormibacteria;o__Dormibacterales;f__Dormibacteraceae;g__CF-54;s__	167	663150	0	1.03	66.67	0.343299	15.67	15	15.536
B11_11	<50% completeness AND/OR >10% contamination	soil	d__Bacteria;p__Dormibacterota;c__Dormibacteria;o__Dormibacterales;f__Dormibacteraceae;g__UBA10449;s__	585	1360180	0	10.34	60	4.136	37.77	35	37.216
B31_85	<50% completeness AND/OR >10% contamination	soil	d__Bacteria;p__Dormibacterota;c__Dormibacteria;o__Dormibacterales;f__Dormibacteraceae;g__UBA10449;s__	150	1267640	0	0	0	0	34.89	35	34.912
B111_33	<50% completeness AND/OR >10% contamination	soil	d__Bacteria;p__Dormibacterota;c__Dormibacteria;o__UBA8260;f__UBA8260;g__Palsa-851;s__	367	791660	0	2.9	100	0	39.33	35	38.464
H23_313	>90% completeness AND <5% contamination	hotsprings	d__Bacteria;p__Chloroflexota;c__Anaerolineae;o__;f__;g__;s__	353	3745670	0	0	0	0	94.83	100	95.864
H6_551	>90% completeness AND <5% contamination	hotsprings	d__Bacteria;p__Chloroflexota;c__Anaerolineae;o__;f__;g__;s__	232	3012090	0	0	0	0	93.1	95	93.48
W92_265	>90% completeness AND <5% contamination	water	d__Bacteria;p__Chloroflexota;c__Anaerolineae;o__4572-78;f__J111;g__;s__	583	9165950	0	1.72	0	1.72	96.55	90	95.24
H39_492	>90% completeness AND <5% contamination	hotsprings	d__Bacteria;p__Chloroflexota;c__Anaerolineae;o__4572-78;f__J111;g__DSQQ01;s__DSQQ01 sp011370265	148	8326100	0.0434777	0	0	0	95.77	95	95.616
R115_30	>90% completeness AND <5% contamination	bioreactor	d__Bacteria;p__Chloroflexota;c__Anaerolineae;o__4572-78;f__J111;g__J095;s__	1049	7271070	0	0	0	0	95.69	90	94.552
H21_268	>90% completeness AND <5% contamination	hotsprings	d__Bacteria;p__Chloroflexota;c__Anaerolineae;o__4572-78;f__J111;g__J111;s__	518	7271140	2.90587	0	0	0	96.55	95	96.24
H16_178	>90% completeness AND <5% contamination	hotsprings	d__Bacteria;p__Chloroflexota;c__Anaerolineae;o__4572-78;f__J111;g__J111;s__J111 sp003694775	616	4692770	0	0	0	0	98.28	75	93.624
H21_245	>90% completeness AND <5% contamination	hotsprings	d__Bacteria;p__Chloroflexota;c__Anaerolineae;o__4572-78;f__NAK82;g__;s__	379	6976690	1.1785	0	0	0	94.83	90	93.864
W31_62	>90% completeness AND <5% contamination	water	d__Bacteria;p__Chloroflexota;c__Anaerolineae;o__4572-78;f__NAK82;g__;s__	208	9456430	2.86292	1.72	0	1.72	98.28	95	97.624
W31_78	>90% completeness AND <5% contamination	water	d__Bacteria;p__Chloroflexota;c__Anaerolineae;o__4572-78;f__NAK82;g__;s__	305	9038800	0.810174	0	0	0	96.55	90	95.24
H106_27	>90% completeness AND <5% contamination	hotsprings	d__Bacteria;p__Chloroflexota;c__Anaerolineae;o__4572-78;f__NAK82;g__NAK82;s__	159	3567850	0.133414	0	0	0	96.55	95	96.24
H78_773	>90% completeness AND <5% contamination	hotsprings	d__Bacteria;p__Chloroflexota;c__Anaerolineae;o__4572-78;f__NAK82;g__NAK82;s__	55	3547360	3.34615	0	0	0	96.55	100	97.24
H111_96	>90% completeness AND <5% contamination	hotsprings	d__Bacteria;p__Chloroflexota;c__Anaerolineae;o__4572-78;f__NAK82;g__NAK82;s__NAK82 sp011362805	272	3213020	0	2.59	50	1.295	96.55	90	95.24
F17_48	>90% completeness AND <5% contamination	microbial mats	d__Bacteria;p__Chloroflexota;c__Anaerolineae;o__Anaerolineales;f__Anaerolineaceae;g__;s__	245	3899950	1.87208	0	0	0	96.55	95	96.24
H111_98	>90% completeness AND <5% contamination	hotsprings	d__Bacteria;p__Chloroflexota;c__Anaerolineae;o__Anaerolineales;f__Anaerolineaceae;g__;s__	88	3149460	0	0	0	0	100	100	100
H13_141	>90% completeness AND <5% contamination	hotsprings	d__Bacteria;p__Chloroflexota;c__Anaerolineae;o__Anaerolineales;f__Anaerolineaceae;g__;s__	84	3445740	0.252195	0	0	0	96.55	90	95.24
H61_596	>90% completeness AND <5% contamination	hotsprings	d__Bacteria;p__Chloroflexota;c__Anaerolineae;o__Anaerolineales;f__Anaerolineaceae;g__;s__	50	5068500	3.02673	3.45	0	3.45	96.55	95	96.24
R24_87	>90% completeness AND <5% contamination	bioreactor	d__Bacteria;p__Chloroflexota;c__Anaerolineae;o__Anaerolineales;f__Anaerolineaceae;g__;s__	396	6220050	0.601603	1.72	0	1.72	98.28	100	98.624
R24_88	>90% completeness AND <5% contamination	bioreactor	d__Bacteria;p__Chloroflexota;c__Anaerolineae;o__Anaerolineales;f__Anaerolineaceae;g__;s__	863	4567070	0.503167	3.61	16.67	3.00821	94.83	85	92.864
R77_210	>90% completeness AND <5% contamination	bioreactor	d__Bacteria;p__Chloroflexota;c__Anaerolineae;o__Anaerolineales;f__Anaerolineaceae;g__;s__	241	2671490	3.40522	1.72	100	0	92.95	95	93.36
R830_246	>90% completeness AND <5% contamination	bioreactor	d__Bacteria;p__Chloroflexota;c__Anaerolineae;o__Anaerolineales;f__Anaerolineaceae;g__;s__	557	2846700	1.45396	3.45	100	0	96.39	75	92.112
R830_265	>90% completeness AND <5% contamination	bioreactor	d__Bacteria;p__Chloroflexota;c__Anaerolineae;o__Anaerolineales;f__Anaerolineaceae;g__;s__	390	2871010	0.928593	4.81	60	1.924	92.95	85	91.36
R103_9	>90% completeness AND <5% contamination	bioreactor	d__Bacteria;p__Chloroflexota;c__Anaerolineae;o__Anaerolineales;f__Anaerolineaceae;g__49-20;s__	42	1886800	2.42368	0	0	0	97.41	95	96.928
R69_175	>90% completeness AND <5% contamination	bioreactor	d__Bacteria;p__Chloroflexota;c__Anaerolineae;o__Anaerolineales;f__Anaerolineaceae;g__49-20;s__	98	1933800	0.842383	0	0	0	96.55	85	94.24
R125_54	>90% completeness AND <5% contamination	bioreactor	d__Bacteria;p__Chloroflexota;c__Anaerolineae;o__Anaerolineales;f__Anaerolineaceae;g__49-20;s__49-20 sp002436085	82	2106060	2.83943	0	0	0	98.28	95	97.624
R830_248	>90% completeness AND <5% contamination	bioreactor	d__Bacteria;p__Chloroflexota;c__Anaerolineae;o__Anaerolineales;f__Anaerolineaceae;g__49-20;s__49-20 sp012517865	80	2.09259e+06	2.51889	0.16	100	0	98.28	90	96.624
H78_772	>90% completeness AND <5% contamination	hotsprings	d__Bacteria;p__Chloroflexota;c__Anaerolineae;o__Anaerolineales;f__Anaerolineaceae;g__Anaerolinea;s__	365	3265510	1.6365	0	0	0	100	95	99
R21_67	>90% completeness AND <5% contamination	bioreactor	d__Bacteria;p__Chloroflexota;c__Anaerolineae;o__Anaerolineales;f__Anaerolineaceae;g__Anaerolinea;s__Anaerolinea thermolimosa	77	3903210	0.913095	0	0	0	96.55	100	97.24
H11_48	>90% completeness AND <5% contamination	hotsprings	d__Bacteria;p__Chloroflexota;c__Anaerolineae;o__Anaerolineales;f__Anaerolineaceae;g__Anaerolinea;s__Anaerolinea thermophila	752	4791850	0.246878	9.48	100	0	97.41	80	93.928
H12_123	>90% completeness AND <5% contamination	hotsprings	d__Bacteria;p__Chloroflexota;c__Anaerolineae;o__Anaerolineales;f__Anaerolineaceae;g__Anaerolinea;s__Anaerolinea thermophila	311	3179370	0.781916	0.86	0	0.86	95.42	75	91.336
H34_449	>90% completeness AND <5% contamination	hotsprings	d__Bacteria;p__Chloroflexota;c__Anaerolineae;o__Anaerolineales;f__Anaerolineaceae;g__Bellilinea;s__	161	3591080	1.18237	0	0	0	94.83	95	94.864
H61_625	>90% completeness AND <5% contamination	hotsprings	d__Bacteria;p__Chloroflexota;c__Anaerolineae;o__Anaerolineales;f__Anaerolineaceae;g__Bellilinea;s__	364	3371180	1.04563	0	0	0	92.63	85	91.104
H67_686	>90% completeness AND <5% contamination	hotsprings	d__Bacteria;p__Chloroflexota;c__Anaerolineae;o__Anaerolineales;f__Anaerolineaceae;g__Bellilinea;s__	580	2951080	0.578432	0.16	0	0.16	92.32	85	90.856
H69_726	>90% completeness AND <5% contamination	hotsprings	d__Bacteria;p__Chloroflexota;c__Anaerolineae;o__Anaerolineales;f__Anaerolineaceae;g__Bellilinea;s__	399	3595460	0.151858	2.38	100	0	93.97	80	91.176
W58_124	>90% completeness AND <5% contamination	water	d__Bacteria;p__Chloroflexota;c__Anaerolineae;o__Anaerolineales;f__Anaerolineaceae;g__Bellilinea;s__	107	3853530	0	0.16	0	0.16	96.55	90	95.24
R115_26	>90% completeness AND <5% contamination	bioreactor	d__Bacteria;p__Chloroflexota;c__Anaerolineae;o__Anaerolineales;f__Anaerolineaceae;g__Bellilinea;s__Bellilinea caldifistulae	32	3640070	0	0	0	0	96.55	95	96.24
W11_38	>90% completeness AND <5% contamination	water	d__Bacteria;p__Chloroflexota;c__Anaerolineae;o__Anaerolineales;f__Anaerolineaceae;g__Bellilinea;s__Bellilinea sp004347695	29	3364470	0	0	0	0	98.28	95	97.624
R800_215	>90% completeness AND <5% contamination	bioreactor	d__Bacteria;p__Chloroflexota;c__Anaerolineae;o__Anaerolineales;f__Anaerolineaceae;g__Brevefilum;s__	26	2518960	0	0	0	0	98.12	95	97.496
H34_448	>90% completeness AND <5% contamination	hotsprings	d__Bacteria;p__Chloroflexota;c__Anaerolineae;o__Anaerolineales;f__Anaerolineaceae;g__Ch132;s__	173	3302390	4.83529	0	0	0	98.28	80	94.624
R24_107	>90% completeness AND <5% contamination	bioreactor	d__Bacteria;p__Chloroflexota;c__Anaerolineae;o__Anaerolineales;f__Anaerolineaceae;g__DSYU01;s__	256	6439430	0.554863	5.34	33.33	3.56018	100	100	100
H61_600	>90% completeness AND <5% contamination	hotsprings	d__Bacteria;p__Chloroflexota;c__Anaerolineae;o__Anaerolineales;f__Anaerolineaceae;g__DSYU01;s__DSYU01 sp011367365	179	5845450	2.65848	3.45	0	3.45	98.28	95	97.624
O15_7	>90% completeness AND <5% contamination	oral	d__Bacteria;p__Chloroflexota;c__Anaerolineae;o__Anaerolineales;f__Anaerolineaceae;g__Flexilinea;s__	207	2353920	2.77027	1.72	0	1.72	96.39	65	90.112
O2D_20	>90% completeness AND <5% contamination	oral	d__Bacteria;p__Chloroflexota;c__Anaerolineae;o__Anaerolineales;f__Anaerolineaceae;g__Flexilinea;s__	139	2632050	3.00564	1.88	50	0.94	96.94	70	91.552
R103_6	>90% completeness AND <5% contamination	bioreactor	d__Bacteria;p__Chloroflexota;c__Anaerolineae;o__Anaerolineales;f__Anaerolineaceae;g__Flexilinea;s__Flexilinea flocculi	381	3039740	1.48434	1.72	0	1.72	96.55	85	94.24
R71_189	>90% completeness AND <5% contamination	bioreactor	d__Bacteria;p__Chloroflexota;c__Anaerolineae;o__Anaerolineales;f__Anaerolineaceae;g__Flexilinea;s__Flexilinea flocculi	264	3222800	2.96264	6.21	66.67	2.06979	94.83	85	92.864
O14_6	>90% completeness AND <5% contamination	oral	d__Bacteria;p__Chloroflexota;c__Anaerolineae;o__Anaerolineales;f__Anaerolineaceae;g__Flexilinea;s__Flexilinea sp001717545	306	2680570	3.99878	1.72	0	1.72	95.22	80	92.176
R103_2	>90% completeness AND <5% contamination	bioreactor	d__Bacteria;p__Chloroflexota;c__Anaerolineae;o__Anaerolineales;f__Anaerolineaceae;g__Leptolinea;s__Leptolinea sp012798535	78	3592370	0.24385	0.86	0	0.86	91.38	95	92.104
R24_105	>90% completeness AND <5% contamination	bioreactor	d__Bacteria;p__Chloroflexota;c__Anaerolineae;o__Anaerolineales;f__Anaerolineaceae;g__Leptolinea;s__Leptolinea sp012798615	174	3488260	2.9929	0.86	0	0.86	96.55	90	95.24
R24_96	>90% completeness AND <5% contamination	bioreactor	d__Bacteria;p__Chloroflexota;c__Anaerolineae;o__Anaerolineales;f__Anaerolineaceae;g__Levilinea;s__	290	3949250	0.463126	1.72	0	1.72	94.83	85	92.864
R69_166	>90% completeness AND <5% contamination	bioreactor	d__Bacteria;p__Chloroflexota;c__Anaerolineae;o__Anaerolineales;f__Anaerolineaceae;g__Longilinea;s__	394	3102210	0	3.61	33.33	2.40679	96.21	80	92.968
R826_234	>90% completeness AND <5% contamination	bioreactor	d__Bacteria;p__Chloroflexota;c__Anaerolineae;o__Anaerolineales;f__Anaerolineaceae;g__Longilinea;s__	352	3547530	0.211415	0.86	100	0	94.83	75	90.864
R89_284	>90% completeness AND <5% contamination	bioreactor	d__Bacteria;p__Chloroflexota;c__Anaerolineae;o__Anaerolineales;f__Anaerolineaceae;g__Longilinea;s__	603	2815350	1.44778	3.45	100	0	95.53	85	93.424
R89_285	>90% completeness AND <5% contamination	bioreactor	d__Bacteria;p__Chloroflexota;c__Anaerolineae;o__Anaerolineales;f__Anaerolineaceae;g__Longilinea;s__	30	2838940	0	0	0	0	98.28	100	98.624
R103_14	>90% completeness AND <5% contamination	bioreactor	d__Bacteria;p__Chloroflexota;c__Anaerolineae;o__Anaerolineales;f__Anaerolineaceae;g__T78;s__	65	1843290	2.97186	0	0	0	96.55	95	96.24
R95_310	>90% completeness AND <5% contamination	bioreactor	d__Bacteria;p__Chloroflexota;c__Anaerolineae;o__Anaerolineales;f__Anaerolineaceae;g__T78;s__	97	2.08964e+06	4.82045	1.72	100	0	94.83	80	91.864
M11_11	>90% completeness AND <5% contamination	marine	d__Bacteria;p__Chloroflexota;c__Anaerolineae;o__Anaerolineales;f__Anaerolineaceae;g__T78;s__T78 sp001603765	28	2286700	0	0	0	0	98.28	95	97.624
R89_278	>90% completeness AND <5% contamination	bioreactor	d__Bacteria;p__Chloroflexota;c__Anaerolineae;o__Anaerolineales;f__Anaerolineaceae;g__T78;s__T78 sp012839565	290	1999040	0	5.17	100	0	91.38	95	92.104
H12_118	>90% completeness AND <5% contamination	hotsprings	d__Bacteria;p__Chloroflexota;c__Anaerolineae;o__Anaerolineales;f__Anaerolineaceae;g__Thermanaerothrix;s__	339	3003280	2.18528	0.16	100	0	96.39	80	93.112
H71_750	>90% completeness AND <5% contamination	hotsprings	d__Bacteria;p__Chloroflexota;c__Anaerolineae;o__Anaerolineales;f__Anaerolineaceae;g__UBA4081;s__	66	3296330	0	1.72	0	1.72	98.12	90	96.496
R103_15	>90% completeness AND <5% contamination	bioreactor	d__Bacteria;p__Chloroflexota;c__Anaerolineae;o__Anaerolineales;f__Anaerolineaceae;g__UBA4781;s__UBA4781 sp012797975	72	2479220	2.50764	0	0	0	94.67	100	95.736
R103_13	>90% completeness AND <5% contamination	bioreactor	d__Bacteria;p__Chloroflexota;c__Anaerolineae;o__Anaerolineales;f__Anaerolineaceae;g__UBA4782;s__	47	3284590	3.18365	0	0	0	98.28	90	96.624
R77_207	>90% completeness AND <5% contamination	bioreactor	d__Bacteria;p__Chloroflexota;c__Anaerolineae;o__Anaerolineales;f__Anaerolineaceae;g__UBA4782;s__	22	3075780	0	0	0	0	98.28	95	97.624
R103_3	>90% completeness AND <5% contamination	bioreactor	d__Bacteria;p__Chloroflexota;c__Anaerolineae;o__Anaerolineales;f__Anaerolineaceae;g__UBA6107;s__	37	2906630	0	0	0	0	96.55	95	96.24
R69_173	>90% completeness AND <5% contamination	bioreactor	d__Bacteria;p__Chloroflexota;c__Anaerolineae;o__Anaerolineales;f__Anaerolineaceae;g__UBA6107;s__	168	2558780	0.497894	0.16	0	0.16	96.55	85	94.24
R77_206	>90% completeness AND <5% contamination	bioreactor	d__Bacteria;p__Chloroflexota;c__Anaerolineae;o__Anaerolineales;f__Anaerolineaceae;g__UBA6107;s__	255	2234690	4.07618	0	0	0	94.83	95	94.864
R77_208	>90% completeness AND <5% contamination	bioreactor	d__Bacteria;p__Chloroflexota;c__Anaerolineae;o__Anaerolineales;f__Anaerolineaceae;g__UBA6107;s__	50	2425220	0	0	0	0	96.55	95	96.24
R103_12	>90% completeness AND <5% contamination	bioreactor	d__Bacteria;p__Chloroflexota;c__Anaerolineae;o__Anaerolineales;f__Anaerolineaceae;g__UBA6107;s__UBA6107 sp012797695	12	3266660	0	0	0	0	100	95	99
R115_23	>90% completeness AND <5% contamination	bioreactor	d__Bacteria;p__Chloroflexota;c__Anaerolineae;o__Anaerolineales;f__Anaerolineaceae;g__UBA6170;s__	198	3712650	1.27887	1.72	100	0	98.28	90	96.624
R830_264	>90% completeness AND <5% contamination	bioreactor	d__Bacteria;p__Chloroflexota;c__Anaerolineae;o__Anaerolineales;f__Anaerolineaceae;g__UBA6170;s__	627	3045740	0.682264	1.72	100	0	94.83	90	93.864
R24_82	>90% completeness AND <5% contamination	bioreactor	d__Bacteria;p__Chloroflexota;c__Anaerolineae;o__Anaerolineales;f__DRKV01;g__;s__	175	2940440	1.9021	0.16	0	0.16	96.55	95	96.24
H16_173	>90% completeness AND <5% contamination	hotsprings	d__Bacteria;p__Chloroflexota;c__Anaerolineae;o__Anaerolineales;f__DRKV01;g__DRKV01;s__	444	3184750	1.2293	0	0	0	98.28	75	93.624
H54_522	>90% completeness AND <5% contamination	hotsprings	d__Bacteria;p__Chloroflexota;c__Anaerolineae;o__Anaerolineales;f__DRKV01;g__DRKV01;s__	387	3134580	3.04538	1.72	100	0	93.1	90	92.48
H21_275	>90% completeness AND <5% contamination	hotsprings	d__Bacteria;p__Chloroflexota;c__Anaerolineae;o__Anaerolineales;f__E44-bin32;g__;s__	432	2637980	2.12511	5.17	50	2.585	91.22	95	91.976
N14_70	>90% completeness AND <5% contamination	high salt	d__Bacteria;p__Chloroflexota;c__Anaerolineae;o__Anaerolineales;f__E44-bin32;g__;s__	116	3702310	0.311697	1.72	100	0	98.28	85	95.624
N4_180	>90% completeness AND <5% contamination	high salt	d__Bacteria;p__Chloroflexota;c__Anaerolineae;o__Anaerolineales;f__E44-bin32;g__;s__	249	3455020	0	0.16	100	0	94.83	95	94.864
N4_223	>90% completeness AND <5% contamination	high salt	d__Bacteria;p__Chloroflexota;c__Anaerolineae;o__Anaerolineales;f__E44-bin32;g__;s__	74	3573680	0.258277	1.72	0	1.72	94.83	95	94.864
N6_271	>90% completeness AND <5% contamination	high salt	d__Bacteria;p__Chloroflexota;c__Anaerolineae;o__Anaerolineales;f__E44-bin32;g__;s__	129	3429620	0	0	0	0	98.28	95	97.624
W31_54	>90% completeness AND <5% contamination	water	d__Bacteria;p__Chloroflexota;c__Anaerolineae;o__Anaerolineales;f__E44-bin32;g__;s__	45	3969210	0	1.72	0	1.72	98.28	95	97.624
M42_98	>90% completeness AND <5% contamination	marine	d__Bacteria;p__Chloroflexota;c__Anaerolineae;o__Anaerolineales;f__E44-bin32;g__E44-bin32;s__	285	4101120	0	0	0	0	93.1	90	92.48
N5_261	>90% completeness AND <5% contamination	high salt	d__Bacteria;p__Chloroflexota;c__Anaerolineae;o__Anaerolineales;f__E44-bin32;g__E44-bin32;s__	230	3297770	0	1.72	0	1.72	92.95	95	93.36
N6_281	>90% completeness AND <5% contamination	high salt	d__Bacteria;p__Chloroflexota;c__Anaerolineae;o__Anaerolineales;f__E44-bin32;g__E44-bin32;s__	97	3330510	0	0	0	0	94.67	85	92.736
N6_298	>90% completeness AND <5% contamination	high salt	d__Bacteria;p__Chloroflexota;c__Anaerolineae;o__Anaerolineales;f__E44-bin32;g__E44-bin32;s__	176	3193550	3.71937	0	0	0	93.1	85	91.48
H11_64	>90% completeness AND <5% contamination	hotsprings	d__Bacteria;p__Chloroflexota;c__Anaerolineae;o__Anaerolineales;f__EnvOPS12;g__;s__	59	2619230	2.37513	0	0	0	96.55	95	96.24
H21_265	>90% completeness AND <5% contamination	hotsprings	d__Bacteria;p__Chloroflexota;c__Anaerolineae;o__Anaerolineales;f__EnvOPS12;g__;s__	315	3169530	1.42419	0.86	0	0.86	90.44	90	90.352
H6_556	>90% completeness AND <5% contamination	hotsprings	d__Bacteria;p__Chloroflexota;c__Anaerolineae;o__Anaerolineales;f__EnvOPS12;g__;s__	451	3041140	0.160466	0	0	0	98.28	70	92.624
H6_563	>90% completeness AND <5% contamination	hotsprings	d__Bacteria;p__Chloroflexota;c__Anaerolineae;o__Anaerolineales;f__EnvOPS12;g__;s__	380	2908840	0.666245	3.45	0	3.45	98.28	100	98.624
H60_586	>90% completeness AND <5% contamination	hotsprings	d__Bacteria;p__Chloroflexota;c__Anaerolineae;o__Anaerolineales;f__EnvOPS12;g__;s__	142	3534200	0.868655	0	0	0	95.61	90	94.488
H63_661	>90% completeness AND <5% contamination	hotsprings	d__Bacteria;p__Chloroflexota;c__Anaerolineae;o__Anaerolineales;f__EnvOPS12;g__;s__	167	2279610	0	2.59	0	2.59	96.55	90	95.24
H64_669	>90% completeness AND <5% contamination	hotsprings	d__Bacteria;p__Chloroflexota;c__Anaerolineae;o__Anaerolineales;f__EnvOPS12;g__;s__	189	3136260	0	0	0	0	98.28	100	98.624
H66_673	>90% completeness AND <5% contamination	hotsprings	d__Bacteria;p__Chloroflexota;c__Anaerolineae;o__Anaerolineales;f__EnvOPS12;g__;s__	62	3666180	0	0	0	0	100	95	99
H68_716	>90% completeness AND <5% contamination	hotsprings	d__Bacteria;p__Chloroflexota;c__Anaerolineae;o__Anaerolineales;f__EnvOPS12;g__;s__	33	2393420	0	1.72	0	1.72	98.28	95	97.624
H70_727	>90% completeness AND <5% contamination	hotsprings	d__Bacteria;p__Chloroflexota;c__Anaerolineae;o__Anaerolineales;f__EnvOPS12;g__;s__	46	2618680	0	1.72	0	1.72	98.28	100	98.624
H78_774	>90% completeness AND <5% contamination	hotsprings	d__Bacteria;p__Chloroflexota;c__Anaerolineae;o__Anaerolineales;f__EnvOPS12;g__;s__	86	2736470	0.0771066	0	0	0	98.28	100	98.624
H82_845	>90% completeness AND <5% contamination	hotsprings	d__Bacteria;p__Chloroflexota;c__Anaerolineae;o__Anaerolineales;f__EnvOPS12;g__;s__	413	2509050	1.47905	1.72	0	1.72	93.1	95	93.48
N8_367	>90% completeness AND <5% contamination	high salt	d__Bacteria;p__Chloroflexota;c__Anaerolineae;o__Anaerolineales;f__EnvOPS12;g__;s__	377	3082060	1.18849	3.45	50	1.725	95.61	75	91.488
H61_591	>90% completeness AND <5% contamination	hotsprings	d__Bacteria;p__Chloroflexota;c__Anaerolineae;o__Anaerolineales;f__EnvOPS12;g__DSXF01;s__DSXF01 sp011367945	46	3162130	1.10337	3.45	0	3.45	100	100	100
H12_122	>90% completeness AND <5% contamination	hotsprings	d__Bacteria;p__Chloroflexota;c__Anaerolineae;o__Anaerolineales;f__EnvOPS12;g__DTJF01;s__	43	2265170	0.643219	0	0	0	89.66	95	90.728
H111_87	>90% completeness AND <5% contamination	hotsprings	d__Bacteria;p__Chloroflexota;c__Anaerolineae;o__Anaerolineales;f__EnvOPS12;g__DTJF01;s__DTJF01 sp011370595	144	2232210	0	0	0	0	95.61	75	91.488
H63_660	>90% completeness AND <5% contamination	hotsprings	d__Bacteria;p__Chloroflexota;c__Anaerolineae;o__Anaerolineales;f__EnvOPS12;g__Fen-1038;s__	94	2652260	0	1.72	0	1.72	100	90	98
H68_703	>90% completeness AND <5% contamination	hotsprings	d__Bacteria;p__Chloroflexota;c__Anaerolineae;o__Anaerolineales;f__EnvOPS12;g__Fen-1038;s__	116	2629380	0	0	0	0	100	95	99
H16_163	>90% completeness AND <5% contamination	hotsprings	d__Bacteria;p__Chloroflexota;c__Anaerolineae;o__Anaerolineales;f__EnvOPS12;g__J097;s__J097 sp003694975	478	2527370	0.278946	1.72	0	1.72	96.55	75	92.24
H21_254	>90% completeness AND <5% contamination	hotsprings	d__Bacteria;p__Chloroflexota;c__Anaerolineae;o__Anaerolineales;f__EnvOPS12;g__JAABUE01;s__	552	5100450	0.190375	3.45	50	1.725	92.16	85	90.728
H33_426	>90% completeness AND <5% contamination	hotsprings	d__Bacteria;p__Chloroflexota;c__Anaerolineae;o__Anaerolineales;f__EnvOPS12;g__JAABUE01;s__	511	3335320	0	1.72	0	1.72	93.1	80	90.48
H81_821	>90% completeness AND <5% contamination	hotsprings	d__Bacteria;p__Chloroflexota;c__Anaerolineae;o__Anaerolineales;f__EnvOPS12;g__JAABUE01;s__	428	3691010	0	1.72	100	0	92.16	90	91.728
F2_69	>90% completeness AND <5% contamination	microbial mats	d__Bacteria;p__Chloroflexota;c__Anaerolineae;o__Anaerolineales;f__EnvOPS12;g__OLB14;s__	1023	4727330	0.273304	0	0	0	96.55	90	95.24
H11_54	>90% completeness AND <5% contamination	hotsprings	d__Bacteria;p__Chloroflexota;c__Anaerolineae;o__Anaerolineales;f__EnvOPS12;g__OLB14;s__	12	3852080	0	0	0	0	100	95	99
H21_244	>90% completeness AND <5% contamination	hotsprings	d__Bacteria;p__Chloroflexota;c__Anaerolineae;o__Anaerolineales;f__EnvOPS12;g__OLB14;s__	719	3497550	0.346814	0.47	33.33	0.313349	90.52	95	91.416
H59_545	>90% completeness AND <5% contamination	hotsprings	d__Bacteria;p__Chloroflexota;c__Anaerolineae;o__Anaerolineales;f__EnvOPS12;g__OLB14;s__	492	3133670	0.281459	0	0	0	96.55	70	91.24
H66_681	>90% completeness AND <5% contamination	hotsprings	d__Bacteria;p__Chloroflexota;c__Anaerolineae;o__Anaerolineales;f__EnvOPS12;g__OLB14;s__	244	3736230	1.8144	0	0	0	100	90	98
H71_742	>90% completeness AND <5% contamination	hotsprings	d__Bacteria;p__Chloroflexota;c__Anaerolineae;o__Anaerolineales;f__EnvOPS12;g__OLB14;s__	99	3183530	1.27029	0.16	100	0	97.41	85	94.928
W58_127	>90% completeness AND <5% contamination	water	d__Bacteria;p__Chloroflexota;c__Anaerolineae;o__Anaerolineales;f__EnvOPS12;g__OLB14;s__OLB14 sp002343775	609	4.09985e+06	0.468798	1.72	0	1.72	94.83	75	90.864
H39_483	>90% completeness AND <5% contamination	hotsprings	d__Bacteria;p__Chloroflexota;c__Anaerolineae;o__Anaerolineales;f__EnvOPS12;g__OLB14;s__OLB14 sp011046595	36	3391840	0	1.72	0	1.72	100	80	96
H71_757	>90% completeness AND <5% contamination	hotsprings	d__Bacteria;p__Chloroflexota;c__Anaerolineae;o__Anaerolineales;f__EnvOPS12;g__UBA12294;s__	319	3193660	0.344432	0	0	0	98.28	95	97.624
H39_481	>90% completeness AND <5% contamination	hotsprings	d__Bacteria;p__Chloroflexota;c__Anaerolineae;o__Anaerolineales;f__EnvOPS12;g__UBA12294;s__UBA12294 sp011331405	58	4392050	0	0	0	0	98.28	90	96.624
H39_484	>90% completeness AND <5% contamination	hotsprings	d__Bacteria;p__Chloroflexota;c__Anaerolineae;o__Anaerolineales;f__EnvOPS12;g__UBA12294;s__UBA12294 sp011362695	450	3271620	0.503726	1.72	100	0	96.55	80	93.24
W58_123	>90% completeness AND <5% contamination	water	d__Bacteria;p__Chloroflexota;c__Anaerolineae;o__Anaerolineales;f__EnvOPS12;g__UBA12294;s__UBA12294 sp013360875	792	4205130	0.490116	7.47	33.33	4.98025	95.92	80	92.736
H21_239	>90% completeness AND <5% contamination	hotsprings	d__Bacteria;p__Chloroflexota;c__Anaerolineae;o__Anaerolineales;f__EnvOPS12;g__UBA12294;s__UBA12294 sp013388685	78	3608580	0.101148	0	0	0	96.55	95	96.24
H51_515	>90% completeness AND <5% contamination	hotsprings	d__Bacteria;p__Chloroflexota;c__Anaerolineae;o__Anaerolineales;f__EnvOPS12;g__UBA5195;s__	359	3572850	2.52571	0	0	0	98.28	85	95.624
H67_698	>90% completeness AND <5% contamination	hotsprings	d__Bacteria;p__Chloroflexota;c__Anaerolineae;o__Anaerolineales;f__EnvOPS12;g__UBA5195;s__	404	4242610	1.74067	1.72	0	1.72	96.55	90	95.24
H71_739	>90% completeness AND <5% contamination	hotsprings	d__Bacteria;p__Chloroflexota;c__Anaerolineae;o__Anaerolineales;f__EnvOPS12;g__UBA5195;s__	111	3656150	4.37291	1.72	100	0	96.55	90	95.24
H39_479	>90% completeness AND <5% contamination	hotsprings	d__Bacteria;p__Chloroflexota;c__Anaerolineae;o__Anaerolineales;f__EnvOPS12;g__UBA5195;s__UBA5195 sp011047105	27	4333900	0.167747	0	0	0	100	100	100
W103_25	>90% completeness AND <5% contamination	water	d__Bacteria;p__Chloroflexota;c__Anaerolineae;o__Anaerolineales;f__EnvOPS12;g__UBA5195;s__UBA5195 sp903838415	199	5655190	0	0.86	100	0	98.28	90	96.624
W58_115	>90% completeness AND <5% contamination	water	d__Bacteria;p__Chloroflexota;c__Anaerolineae;o__Anaerolineales;f__EnvOPS12;g__UBA7227;s__	306	3950350	0.436164	0	0	0	97.41	90	95.928
F3_82	>90% completeness AND <5% contamination	microbial mats	d__Bacteria;p__Chloroflexota;c__Anaerolineae;o__Anaerolineales;f__EnvOPS12;g__UBA7227;s__UBA7227 sp002473085	44	3617350	0.355232	0	0	0	97.34	100	97.872
W58_120	>90% completeness AND <5% contamination	water	d__Bacteria;p__Chloroflexota;c__Anaerolineae;o__Anaerolineales;f__EnvOPS12;g__UBA8950;s__	403	3989490	0	3.45	50	1.725	94.83	85	92.864
N14_58	>90% completeness AND <5% contamination	high salt	d__Bacteria;p__Chloroflexota;c__Anaerolineae;o__Anaerolineales;f__RBG-16-64-43;g__FEN-1073;s__	261	3809030	0	0.86	100	0	98.12	90	96.496
B14_40	>90% completeness AND <5% contamination	soil	d__Bacteria;p__Chloroflexota;c__Anaerolineae;o__Anaerolineales;f__UBA4823;g__;s__	441	3415450	1.57783	2.59	0	2.59	91.22	90	90.976
N7_331	>90% completeness AND <5% contamination	high salt	d__Bacteria;p__Chloroflexota;c__Anaerolineae;o__Anaerolineales;f__UBA4823;g__;s__	185	4.14344e+06	2.86308	1.72	0	1.72	98.28	80	94.624
H61_621	>90% completeness AND <5% contamination	hotsprings	d__Bacteria;p__Chloroflexota;c__Anaerolineae;o__Anaerolineales;f__UBA4823;g__DSTM01;s__DSTM01 sp011329365	69	3572790	0.410324	0	0	0	94.83	95	94.864
R30_111	>90% completeness AND <5% contamination	bioreactor	d__Bacteria;p__Chloroflexota;c__Anaerolineae;o__Anaerolineales;f__UBA4823;g__JAAYXE01;s__JAAYXE01 sp012516075	171	4838070	1.91357	0.86	0	0.86	98.12	95	97.496
H38_463	>90% completeness AND <5% contamination	hotsprings	d__Bacteria;p__Chloroflexota;c__Anaerolineae;o__Anaerolineales;f__UBA4823;g__NAK19;s__	230	3661820	1.43453	1.72	0	1.72	94.67	90	93.736
H12_133	>90% completeness AND <5% contamination	hotsprings	d__Bacteria;p__Chloroflexota;c__Anaerolineae;o__Anaerolineales;f__UBA4823;g__NAK19;s__NAK19 sp003327455	61	3816830	3.58544	1.72	0	1.72	96.39	85	94.112
R115_28	>90% completeness AND <5% contamination	bioreactor	d__Bacteria;p__Chloroflexota;c__Anaerolineae;o__Anaerolineales;f__UBA4823;g__RBG-16-57-11;s__	356	4523730	3.17592	1.72	0	1.72	92.79	85	91.232
W58_116	>90% completeness AND <5% contamination	water	d__Bacteria;p__Chloroflexota;c__Anaerolineae;o__Anaerolineales;f__UBA4823;g__RBG-16-57-11;s__	86	4098580	1.50857	1.72	0	1.72	94.67	90	93.736
H111_85	>90% completeness AND <5% contamination	hotsprings	d__Bacteria;p__Chloroflexota;c__Anaerolineae;o__Anaerolineales;f__UBA4823;g__UBA4823;s__	376	3293370	1.78905	0.16	100	0	92.95	90	92.36
F11_5	>90% completeness AND <5% contamination	microbial mats	d__Bacteria;p__Chloroflexota;c__Anaerolineae;o__Anaerolineales;f__UBA6663;g__;s__	584	5057640	0	0	0	0	98.28	70	92.624
F18_67	>90% completeness AND <5% contamination	microbial mats	d__Bacteria;p__Chloroflexota;c__Anaerolineae;o__Anaerolineales;f__UBA6663;g__;s__	880	5269180	0	0	0	0	97.65	70	92.12
H2_223	>90% completeness AND <5% contamination	hotsprings	d__Bacteria;p__Chloroflexota;c__Anaerolineae;o__Anaerolineales;f__UBA6663;g__;s__	597	6100900	1.8158	3.45	33.33	2.30011	92.79	80	90.232
H20_231	>90% completeness AND <5% contamination	hotsprings	d__Bacteria;p__Chloroflexota;c__Anaerolineae;o__Anaerolineales;f__UBA6663;g__;s__	706	5341080	1.45514	1.72	0	1.72	93.1	95	93.48
H51_511	>90% completeness AND <5% contamination	hotsprings	d__Bacteria;p__Chloroflexota;c__Anaerolineae;o__Anaerolineales;f__UBA6663;g__DSNW01;s__	182	4.12918e+06	4.35074	0	0	0	98.28	95	97.624
H39_482	>90% completeness AND <5% contamination	hotsprings	d__Bacteria;p__Chloroflexota;c__Anaerolineae;o__Anaerolineales;f__UBA6663;g__DSNW01;s__DSNW01 sp011047095	22	4659730	0	0	0	0	100	100	100
H61_599	>90% completeness AND <5% contamination	hotsprings	d__Bacteria;p__Chloroflexota;c__Anaerolineae;o__Anaerolineales;f__UBA6663;g__SpSt-583;s__SpSt-583 sp011367385	282	5603500	2.20987	0.34	100	0	94.67	100	95.736
H21_255	>90% completeness AND <5% contamination	hotsprings	d__Bacteria;p__Chloroflexota;c__Anaerolineae;o__B4-G1;f__;g__;s__	184	5350100	0	0.47	0	0.47	95.53	90	94.424
F17_41	>90% completeness AND <5% contamination	microbial mats	d__Bacteria;p__Chloroflexota;c__Anaerolineae;o__B4-G1;f__B4-G1;g__;s__	391	6134550	0	0.47	0	0.47	95.69	95	95.552
H23_299	>90% completeness AND <5% contamination	hotsprings	d__Bacteria;p__Chloroflexota;c__Anaerolineae;o__B4-G1;f__B4-G1;g__;s__	286	3677200	0	0	0	0	93.1	90	92.48
H33_445	>90% completeness AND <5% contamination	hotsprings	d__Bacteria;p__Chloroflexota;c__Anaerolineae;o__B4-G1;f__B4-G1;g__;s__	229	3694580	0	0	0	0	96.55	90	95.24
H67_700	>90% completeness AND <5% contamination	hotsprings	d__Bacteria;p__Chloroflexota;c__Anaerolineae;o__B4-G1;f__B4-G1;g__;s__	249	3880240	0	0	0	0	93.81	95	94.048
N2_102	>90% completeness AND <5% contamination	high salt	d__Bacteria;p__Chloroflexota;c__Anaerolineae;o__B4-G1;f__B4-G1;g__;s__	430	4648390	0	0.16	100	0	93.97	95	94.176
N13_43	>90% completeness AND <5% contamination	high salt	d__Bacteria;p__Chloroflexota;c__Anaerolineae;o__B4-G1;f__B4-G1;g__B30-G15;s__	554	5639830	0.211354	2.74	0	2.74	98.28	100	98.624
N3_163	>90% completeness AND <5% contamination	high salt	d__Bacteria;p__Chloroflexota;c__Anaerolineae;o__B4-G1;f__B4-G1;g__B30-G15;s__	312	3921690	0	1.18	0	1.18	99.14	95	98.312
N9_408	>90% completeness AND <5% contamination	high salt	d__Bacteria;p__Chloroflexota;c__Anaerolineae;o__B4-G1;f__B4-G1;g__B30-G15;s__	168	5082820	0	1.72	33.33	1.14672	98.28	100	98.624
F17_42	>90% completeness AND <5% contamination	microbial mats	d__Bacteria;p__Chloroflexota;c__Anaerolineae;o__B4-G1;f__B4-G1;g__DSAR01;s__	386	4089830	0	1.36	0	1.36	95.69	90	94.552
H19_218	>90% completeness AND <5% contamination	hotsprings	d__Bacteria;p__Chloroflexota;c__Anaerolineae;o__B4-G1;f__B4-G1;g__DSDT01;s__DSDT01 sp011048615	262	4341020	0	0	0	0	100	95	99
H23_305	>90% completeness AND <5% contamination	hotsprings	d__Bacteria;p__Chloroflexota;c__Anaerolineae;o__B4-G1;f__DUEL01;g__;s__	260	2860660	0	0	0	0	96.55	95	96.24
H33_435	>90% completeness AND <5% contamination	hotsprings	d__Bacteria;p__Chloroflexota;c__Anaerolineae;o__B4-G1;f__DUEL01;g__;s__	386	2690250	0	0	0	0	92.95	80	90.36
H33_443	>90% completeness AND <5% contamination	hotsprings	d__Bacteria;p__Chloroflexota;c__Anaerolineae;o__B4-G1;f__DUEL01;g__;s__	207	2880730	0	0	0	0	97.26	90	95.808
H6_557	>90% completeness AND <5% contamination	hotsprings	d__Bacteria;p__Chloroflexota;c__Anaerolineae;o__B4-G1;f__DUEL01;g__;s__	129	2920400	0	0	0	0	94.83	95	94.864
H106_29	>90% completeness AND <5% contamination	hotsprings	d__Bacteria;p__Chloroflexota;c__Anaerolineae;o__B4-G1;f__DUEL01;g__SpSt-77;s__	249	3358850	0	0	0	0	93.97	75	90.176
H12_134	>90% completeness AND <5% contamination	hotsprings	d__Bacteria;p__Chloroflexota;c__Anaerolineae;o__B4-G1;f__DUEL01;g__SpSt-77;s__	489	2976400	0	0	0	0	95.69	70	90.552
H13_138	>90% completeness AND <5% contamination	hotsprings	d__Bacteria;p__Chloroflexota;c__Anaerolineae;o__B4-G1;f__DUEL01;g__SpSt-77;s__	399	3190360	0	1.72	100	0	98.28	95	97.624
H70_732	>90% completeness AND <5% contamination	hotsprings	d__Bacteria;p__Chloroflexota;c__Anaerolineae;o__B4-G1;f__DUEL01;g__SpSt-77;s__	612	2828210	0	1.72	0	1.72	91.38	95	92.104
H78_784	>90% completeness AND <5% contamination	hotsprings	d__Bacteria;p__Chloroflexota;c__Anaerolineae;o__B4-G1;f__DUEL01;g__SpSt-77;s__	178	3393320	0	0	0	0	98.28	100	98.624
H61_623	>90% completeness AND <5% contamination	hotsprings	d__Bacteria;p__Chloroflexota;c__Anaerolineae;o__B4-G1;f__DUEL01;g__SpSt-77;s__SpSt-77 sp011053895	160	3395990	0	0	0	0	98.28	100	98.624
F14_17	>90% completeness AND <5% contamination	microbial mats	d__Bacteria;p__Chloroflexota;c__Anaerolineae;o__B4-G1;f__SLSP01;g__;s__	280	5556340	0	2.59	0	2.59	94.83	90	93.864
H59_548	>90% completeness AND <5% contamination	hotsprings	d__Bacteria;p__Chloroflexota;c__Anaerolineae;o__B4-G1;f__SLSP01;g__;s__	255	2558410	0	0	0	0	97.49	80	93.992
H71_746	>90% completeness AND <5% contamination	hotsprings	d__Bacteria;p__Chloroflexota;c__Anaerolineae;o__B4-G1;f__SLSP01;g__;s__	95	2762950	0.378219	0	0	0	95.45	95	95.36
H51_510	>90% completeness AND <5% contamination	hotsprings	d__Bacteria;p__Chloroflexota;c__Anaerolineae;o__B4-G1;f__SLSP01;g__DSWT01;s__	950	4976310	0	3.61	33.33	2.40679	94.83	75	90.864
H66_674	>90% completeness AND <5% contamination	hotsprings	d__Bacteria;p__Chloroflexota;c__Anaerolineae;o__B4-G1;f__SLSP01;g__DSWT01;s__	337	4740930	0	3.45	0	3.45	89.66	95	90.728
H67_697	>90% completeness AND <5% contamination	hotsprings	d__Bacteria;p__Chloroflexota;c__Anaerolineae;o__B4-G1;f__SLSP01;g__DSWT01;s__	729	5055930	0	3.45	0	3.45	95.69	85	93.552
R24_80	>90% completeness AND <5% contamination	bioreactor	d__Bacteria;p__Chloroflexota;c__Anaerolineae;o__B4-G1;f__SLSP01;g__DSWT01;s__	622	6551980	0	2.59	0	2.59	96.6	90	95.28
R24_97	>90% completeness AND <5% contamination	bioreactor	d__Bacteria;p__Chloroflexota;c__Anaerolineae;o__B4-G1;f__SLSP01;g__DSWT01;s__	347	6781190	0	4.78	0	4.78	98.28	100	98.624
H61_597	>90% completeness AND <5% contamination	hotsprings	d__Bacteria;p__Chloroflexota;c__Anaerolineae;o__B4-G1;f__SLSP01;g__DSWT01;s__DSWT01 sp011370065	148	5625100	1.83695	1.72	0	1.72	96.55	95	96.24
F17_49	>90% completeness AND <5% contamination	microbial mats	d__Bacteria;p__Chloroflexota;c__Anaerolineae;o__B4-G1;f__SLSP01;g__G713;s__	612	5174570	0	1.72	0	1.72	94.83	85	92.864
F7_115	>90% completeness AND <5% contamination	microbial mats	d__Bacteria;p__Chloroflexota;c__Anaerolineae;o__B4-G1;f__SLSP01;g__G713;s__	180	4255280	0	1.72	0	1.72	98.28	80	94.624
H80_794	>90% completeness AND <5% contamination	hotsprings	d__Bacteria;p__Chloroflexota;c__Anaerolineae;o__B4-G1;f__SLSP01;g__G713;s__	979	4299560	0	3.45	100	0	93.1	85	91.48
H19_217	>90% completeness AND <5% contamination	hotsprings	d__Bacteria;p__Chloroflexota;c__Anaerolineae;o__B4-G1;f__SLSP01;g__JAAZNO01;s__	226	3058730	0	0.86	0	0.86	98.12	90	96.496
R77_209	>90% completeness AND <5% contamination	bioreactor	d__Bacteria;p__Chloroflexota;c__Anaerolineae;o__B4-G1;f__SLSP01;g__JAAZNO01;s__	459	3743780	0	1.88	100	0	93.1	90	92.48
S21_134	>90% completeness AND <5% contamination	corals/sponges	d__Bacteria;p__Chloroflexota;c__Anaerolineae;o__Caldilineales;f__Bin34;g__Bin34;s__	548	3376250	0	0.86	100	0	93.1	90	92.48
S34_279	>90% completeness AND <5% contamination	corals/sponges	d__Bacteria;p__Chloroflexota;c__Anaerolineae;o__Caldilineales;f__Bin34;g__Bin34;s__	43	4603060	0	0	0	0	98.28	100	98.624
S35_289	>90% completeness AND <5% contamination	corals/sponges	d__Bacteria;p__Chloroflexota;c__Anaerolineae;o__Caldilineales;f__Bin34;g__Bin34;s__	160	3864860	0	1.88	100	0	98.12	100	98.496
S18_106	>90% completeness AND <5% contamination	corals/sponges	d__Bacteria;p__Chloroflexota;c__Anaerolineae;o__Caldilineales;f__Bin34;g__Bin34;s__Bin34 sp002238555	345	3934590	0	0	0	0	95.3	95	95.24
S36_292	>90% completeness AND <5% contamination	corals/sponges	d__Bacteria;p__Chloroflexota;c__Anaerolineae;o__Caldilineales;f__Bin34;g__Bin34;s__Bin34 sp002238555	199	4696050	0	0	0	0	98.28	80	94.624
S10_50	>90% completeness AND <5% contamination	corals/sponges	d__Bacteria;p__Chloroflexota;c__Anaerolineae;o__Caldilineales;f__Bin34;g__Bin34;s__Bin34 sp009841145	160	4360990	0	1.72	100	0	96.55	100	97.24
S25_165	>90% completeness AND <5% contamination	corals/sponges	d__Bacteria;p__Chloroflexota;c__Anaerolineae;o__Caldilineales;f__Bin34;g__Bin34;s__Bin34 sp009841145	112	4223730	0	0	0	0	98.28	100	98.624
S9_398	>90% completeness AND <5% contamination	corals/sponges	d__Bacteria;p__Chloroflexota;c__Anaerolineae;o__Caldilineales;f__Bin34;g__Bin34;s__Bin34 sp009841145	152	4240120	0	0	0	0	98.28	100	98.624
S18_112	>90% completeness AND <5% contamination	corals/sponges	d__Bacteria;p__Chloroflexota;c__Anaerolineae;o__Caldilineales;f__Caldilineaceae;g__Bin5;s__	768	5041220	0.682375	9.48	50	4.74	93.81	80	91.048
S2_115	>90% completeness AND <5% contamination	corals/sponges	d__Bacteria;p__Chloroflexota;c__Anaerolineae;o__Caldilineales;f__Caldilineaceae;g__Bin5;s__	378	3874910	1.80236	2.3	100	0	96.39	85	94.112
S2_117	>90% completeness AND <5% contamination	corals/sponges	d__Bacteria;p__Chloroflexota;c__Anaerolineae;o__Caldilineales;f__Caldilineaceae;g__Bin5;s__	542	5091330	1.68168	2.3	50	1.15	99.84	85	96.872
S2_120	>90% completeness AND <5% contamination	corals/sponges	d__Bacteria;p__Chloroflexota;c__Anaerolineae;o__Caldilineales;f__Caldilineaceae;g__Bin5;s__	477	4699520	2.64218	4.02	66.67	1.33987	98.12	75	93.496
S24_148	>90% completeness AND <5% contamination	corals/sponges	d__Bacteria;p__Chloroflexota;c__Anaerolineae;o__Caldilineales;f__Caldilineaceae;g__Bin5;s__	151	5446510	2.70118	8.62	100	0	95.77	95	95.616
S34_276	>90% completeness AND <5% contamination	corals/sponges	d__Bacteria;p__Chloroflexota;c__Anaerolineae;o__Caldilineales;f__Caldilineaceae;g__Bin5;s__	87	4884820	4.09943	0	0	0	99.84	95	98.872
S8_367	>90% completeness AND <5% contamination	corals/sponges	d__Bacteria;p__Chloroflexota;c__Anaerolineae;o__Caldilineales;f__Caldilineaceae;g__Bin5;s__	739	3934770	2.51984	3.47	80	0.694	96.39	70	91.112
S36_291	>90% completeness AND <5% contamination	corals/sponges	d__Bacteria;p__Chloroflexota;c__Anaerolineae;o__Caldilineales;f__Caldilineaceae;g__Bin5;s__Bin5 sp002238445	306	5463230	2.29077	0	0	0	98.12	100	98.496
S24_147	>90% completeness AND <5% contamination	corals/sponges	d__Bacteria;p__Chloroflexota;c__Anaerolineae;o__Caldilineales;f__Caldilineaceae;g__Bin5;s__Bin5 sp009838625	121	5587940	2.53385	1.72	100	0	96.39	95	96.112
S9_400	>90% completeness AND <5% contamination	corals/sponges	d__Bacteria;p__Chloroflexota;c__Anaerolineae;o__Caldilineales;f__Caldilineaceae;g__Bin5;s__Bin5 sp009840225	366	5300410	1.235	0	0	0	95.53	90	94.424
S10_58	>90% completeness AND <5% contamination	corals/sponges	d__Bacteria;p__Chloroflexota;c__Anaerolineae;o__Caldilineales;f__Caldilineaceae;g__Bin5;s__Bin5 sp009841235	151	5002720	3.33958	0	0	0	98.12	95	97.496
S25_172	>90% completeness AND <5% contamination	corals/sponges	d__Bacteria;p__Chloroflexota;c__Anaerolineae;o__Caldilineales;f__Caldilineaceae;g__Bin5;s__Bin5 sp009841235	79	5072090	1.70344	1.72	100	0	98.12	95	97.496
S27_192	>90% completeness AND <5% contamination	corals/sponges	d__Bacteria;p__Chloroflexota;c__Anaerolineae;o__Caldilineales;f__Caldilineaceae;g__Bin5;s__Bin5 sp009841235	817	4671210	0.811353	0.16	0	0.16	96.39	75	92.112
H12_125	>90% completeness AND <5% contamination	hotsprings	d__Bacteria;p__Chloroflexota;c__Anaerolineae;o__Caldilineales;f__Caldilineaceae;g__Caldilinea;s__	510	4958960	0.442028	0	0	0	93.81	90	93.048
H78_776	>90% completeness AND <5% contamination	hotsprings	d__Bacteria;p__Chloroflexota;c__Anaerolineae;o__Caldilineales;f__Caldilineaceae;g__Caldilinea;s__	75	5112980	0.923923	0	0	0	98.12	100	98.496
H24_339	>90% completeness AND <5% contamination	hotsprings	d__Bacteria;p__Chloroflexota;c__Anaerolineae;o__Caldilineales;f__Caldilineaceae;g__Caldilinea;s__Caldilinea aerophila	340	4722400	3.21193	3.45	50	1.725	99.84	85	96.872
H27_364	>90% completeness AND <5% contamination	hotsprings	d__Bacteria;p__Chloroflexota;c__Anaerolineae;o__Caldilineales;f__Caldilineaceae;g__Caldilinea;s__Caldilinea aerophila	285	4733560	4.2205	0	0	0	99.84	95	98.872
H61_603	>90% completeness AND <5% contamination	hotsprings	d__Bacteria;p__Chloroflexota;c__Anaerolineae;o__Caldilineales;f__Caldilineaceae;g__Caldilinea;s__Caldilinea aerophila	695	5340380	1.88039	6.9	100	0	91.22	95	91.976
F11_8	>90% completeness AND <5% contamination	microbial mats	d__Bacteria;p__Chloroflexota;c__Anaerolineae;o__Caldilineales;f__Caldilineaceae;g__CFX5;s__	876	8.25811e+06	0.353107	0	0	0	99.84	80	95.872
H76_764	>90% completeness AND <5% contamination	hotsprings	d__Bacteria;p__Chloroflexota;c__Anaerolineae;o__Caldilineales;f__Caldilineaceae;g__CFX5;s__	239	12342160	1.56593	0.47	0	0.47	99.84	95	98.872
R826_221	>90% completeness AND <5% contamination	bioreactor	d__Bacteria;p__Chloroflexota;c__Anaerolineae;o__Caldilineales;f__Caldilineaceae;g__CFX5;s__	1653	10571410	0.389257	6.5	28.57	4.64295	93.65	80	90.92
H24_330	>90% completeness AND <5% contamination	hotsprings	d__Bacteria;p__Chloroflexota;c__Anaerolineae;o__Caldilineales;f__J102;g__JABWBG01;s__	184	3738050	0	0.86	0	0.86	94.67	85	92.736
H59_543	>90% completeness AND <5% contamination	hotsprings	d__Bacteria;p__Chloroflexota;c__Anaerolineae;o__Caldilineales;f__J102;g__JABWBG01;s__	228	3561010	0	0	0	0	96.39	95	96.112
H62_635	>90% completeness AND <5% contamination	hotsprings	d__Bacteria;p__Chloroflexota;c__Anaerolineae;o__Caldilineales;f__J102;g__JABWBG01;s__	100	3723350	0	0	0	0	96.39	90	95.112
M52_174	>90% completeness AND <5% contamination	marine	d__Bacteria;p__Chloroflexota;c__Anaerolineae;o__Caldilineales;f__J102;g__JABWBG01;s__	154	5742400	0.961619	0	0	0	94.67	100	95.736
H71_756	>90% completeness AND <5% contamination	hotsprings	d__Bacteria;p__Chloroflexota;c__Anaerolineae;o__Caldilineales;f__JAAEKA01;g__;s__	300	4718650	0.428089	1.72	0	1.72	91.22	90	90.976
H6_552	>90% completeness AND <5% contamination	hotsprings	d__Bacteria;p__Chloroflexota;c__Anaerolineae;o__CG2-30-64-16;f__CG2-30-64-16;g__;s__	275	3343210	0	0.86	0	0.86	93.81	85	92.048
H6_565	>90% completeness AND <5% contamination	hotsprings	d__Bacteria;p__Chloroflexota;c__Anaerolineae;o__CG2-30-64-16;f__CG2-30-64-16;g__MWBF01;s__	254	4.10206e+06	0	1.72	0	1.72	98.12	95	97.496
H66_683	>90% completeness AND <5% contamination	hotsprings	d__Bacteria;p__Chloroflexota;c__Anaerolineae;o__CG2-30-64-16;f__CG2-30-64-16;g__MWBF01;s__	605	4770540	0	3.61	66.67	1.20321	96.39	90	95.112
H71_738	>90% completeness AND <5% contamination	hotsprings	d__Bacteria;p__Chloroflexota;c__Anaerolineae;o__CG2-30-64-16;f__CG2-30-64-16;g__MWBF01;s__	174	4431750	0	1.72	0	1.72	98.12	90	96.496
H78_780	>90% completeness AND <5% contamination	hotsprings	d__Bacteria;p__Chloroflexota;c__Anaerolineae;o__CG2-30-64-16;f__CG2-30-64-16;g__MWBF01;s__	153	4485930	0	1.72	0	1.72	99.84	100	99.872
R69_164	>90% completeness AND <5% contamination	bioreactor	d__Bacteria;p__Chloroflexota;c__Anaerolineae;o__CG2-30-64-16;f__CG2-30-64-16;g__MWBF01;s__	630	5009010	0	1.72	0	1.72	93.97	90	93.176
R89_282	>90% completeness AND <5% contamination	bioreactor	d__Bacteria;p__Chloroflexota;c__Anaerolineae;o__CG2-30-64-16;f__SSC4;g__SSC4;s__	554	3895600	0	0	0	0	92.95	80	90.36
H33_416	>90% completeness AND <5% contamination	hotsprings	d__Bacteria;p__Chloroflexota;c__Anaerolineae;o__DRVO01;f__DRVO01;g__;s__	292	2932040	0	0	0	0	95.53	90	94.424
H111_82	>90% completeness AND <5% contamination	hotsprings	d__Bacteria;p__Chloroflexota;c__Anaerolineae;o__DRVO01;f__DRVO01;g__DRVO01;s__DRVO01 sp011373995	271	2922800	0	0	0	0	96.21	100	96.968
H25_353	>90% completeness AND <5% contamination	hotsprings	d__Bacteria;p__Chloroflexota;c__Anaerolineae;o__DRVO01;f__DRVO01;g__DRVO01;s__DRVO01 sp011373995	484	3180370	0	3.45	50	1.725	94.83	75	90.864
H63_654	>90% completeness AND <5% contamination	hotsprings	d__Bacteria;p__Chloroflexota;c__Anaerolineae;o__DSLN01;f__DSLN01;g__DSLN01;s__	286	3420730	0	0.31	50	0.155	94.67	95	94.736
H68_711	>90% completeness AND <5% contamination	hotsprings	d__Bacteria;p__Chloroflexota;c__Anaerolineae;o__DSLN01;f__DSLN01;g__DSLN01;s__	89	3605630	0	0	0	0	98.12	95	97.496
H61_607	>90% completeness AND <5% contamination	hotsprings	d__Bacteria;p__Chloroflexota;c__Anaerolineae;o__DSLN01;f__DSLN01;g__DSLN01;s__DSLN01 sp011048175	105	3666290	0.0894637	0.86	0	0.86	98.12	85	95.496
H23_304	>90% completeness AND <5% contamination	hotsprings	d__Bacteria;p__Chloroflexota;c__Anaerolineae;o__DTPP01;f__;g__;s__	251	3540120	0	1.72	0	1.72	94.67	80	91.736
H111_75	>90% completeness AND <5% contamination	hotsprings	d__Bacteria;p__Chloroflexota;c__Anaerolineae;o__DTPP01;f__DTLA01;g__DTLA01;s__DTLA01 sp011333425	297	3601990	0	3.45	0	3.45	94.67	95	94.736
H111_79	>90% completeness AND <5% contamination	hotsprings	d__Bacteria;p__Chloroflexota;c__Anaerolineae;o__DTPP01;f__DTPP01;g__DTPP01;s__DTPP01 sp011334325	519	3292300	0	3.45	0	3.45	94.51	80	91.608
H25_343	>90% completeness AND <5% contamination	hotsprings	d__Bacteria;p__Chloroflexota;c__Anaerolineae;o__DTPP01;f__DTPP01;g__DTPP01;s__DTPP01 sp011334325	540	3266490	0	3.45	33.33	2.30011	94.2	90	93.36
H25_352	>90% completeness AND <5% contamination	hotsprings	d__Bacteria;p__Chloroflexota;c__Anaerolineae;o__DTPP01;f__JACIWP01;g__JACIWP01;s__JACIWP01 sp014360855	171	3150950	1.92196	1.72	0	1.72	92.95	80	90.36
H33_420	>90% completeness AND <5% contamination	hotsprings	d__Bacteria;p__Chloroflexota;c__Anaerolineae;o__DUEN01;f__;g__;s__	430	2632340	1.9458	0.16	0	0.16	98.28	60	90.624
H63_643	>90% completeness AND <5% contamination	hotsprings	d__Bacteria;p__Chloroflexota;c__Anaerolineae;o__DUEN01;f__DUEN01;g__;s__	467	4449000	1.97662	0.47	0	0.47	92.95	80	90.36
H68_701	>90% completeness AND <5% contamination	hotsprings	d__Bacteria;p__Chloroflexota;c__Anaerolineae;o__DUEN01;f__DUEN01;g__;s__	171	3772220	1.89066	0	0	0	99.84	95	98.872
W31_52	>90% completeness AND <5% contamination	water	d__Bacteria;p__Chloroflexota;c__Anaerolineae;o__E26-bin7;f__E26-bin7;g__;s__	202	4815250	0	3.79	100	0	98.12	90	96.496
M42_99	>90% completeness AND <5% contamination	marine	d__Bacteria;p__Chloroflexota;c__Anaerolineae;o__E26-bin7;f__JACIWR01;g__;s__	154	3846500	0	0.86	0	0.86	91.38	90	91.104
H21_249	>90% completeness AND <5% contamination	hotsprings	d__Bacteria;p__Chloroflexota;c__Anaerolineae;o__JAAYZQ01;f__JAAYZQ01;g__;s__	140	4174260	0	0	0	0	96.39	100	97.112
H23_320	>90% completeness AND <5% contamination	hotsprings	d__Bacteria;p__Chloroflexota;c__Anaerolineae;o__JAAYZQ01;f__JAAYZQ01;g__;s__	307	3295450	0	1.72	100	0	96.39	100	97.112
H33_433	>90% completeness AND <5% contamination	hotsprings	d__Bacteria;p__Chloroflexota;c__Anaerolineae;o__JAAYZQ01;f__JAAYZQ01;g__;s__	375	2891230	0	0	0	0	92.95	85	91.36
H63_641	>90% completeness AND <5% contamination	hotsprings	d__Bacteria;p__Chloroflexota;c__Anaerolineae;o__JAAYZQ01;f__JAAYZQ01;g__;s__	177	3522600	0	0	0	0	94.83	100	95.864
R44_137	>90% completeness AND <5% contamination	bioreactor	d__Bacteria;p__Chloroflexota;c__Anaerolineae;o__JAAYZQ01;f__JAAYZQ01;g__;s__	129	4661070	0.0377596	1.72	0	1.72	94.83	95	94.864
R89_289	>90% completeness AND <5% contamination	bioreactor	d__Bacteria;p__Chloroflexota;c__Anaerolineae;o__JAAYZQ01;f__JAAYZQ01;g__JAAYZQ01;s__JAAYZQ01 sp012514775	261	5915140	0	5.17	33.33	3.44684	99.84	85	96.872
H21_261	>90% completeness AND <5% contamination	hotsprings	d__Bacteria;p__Chloroflexota;c__Anaerolineae;o__Promineofilales;f__Promineofilaceae;g__;s__	147	4414850	0	0	0	0	96.39	100	97.112
H16_161	>90% completeness AND <5% contamination	hotsprings	d__Bacteria;p__Chloroflexota;c__Anaerolineae;o__Promineofilales;f__Promineofilaceae;g__J033;s__J033 sp003696605	260	4059250	0	0	0	0	98.12	90	96.496
H21_274	>90% completeness AND <5% contamination	hotsprings	d__Bacteria;p__Chloroflexota;c__Anaerolineae;o__SBR1031;f__;g__;s__	517	4990680	0	1.72	100	0	96.55	80	93.24
F11_13	>90% completeness AND <5% contamination	microbial mats	d__Bacteria;p__Chloroflexota;c__Anaerolineae;o__SBR1031;f__A4b;g__;s__	649	5402100	0.55534	0	0	0	99.69	85	96.752
F14_29	>90% completeness AND <5% contamination	microbial mats	d__Bacteria;p__Chloroflexota;c__Anaerolineae;o__SBR1031;f__A4b;g__;s__	533	5851900	2.05933	1.72	0	1.72	99.14	85	96.312
F17_58	>90% completeness AND <5% contamination	microbial mats	d__Bacteria;p__Chloroflexota;c__Anaerolineae;o__SBR1031;f__A4b;g__;s__	823	5514610	0.672577	4.31	0	4.31	100	90	98
H16_164	>90% completeness AND <5% contamination	hotsprings	d__Bacteria;p__Chloroflexota;c__Anaerolineae;o__SBR1031;f__A4b;g__;s__	688	3509000	0.664292	1.72	100	0	95.69	75	91.552
H18_201	>90% completeness AND <5% contamination	hotsprings	d__Bacteria;p__Chloroflexota;c__Anaerolineae;o__SBR1031;f__A4b;g__;s__	679	5165410	0.46521	0.16	0	0.16	95.69	95	95.552
H18_214	>90% completeness AND <5% contamination	hotsprings	d__Bacteria;p__Chloroflexota;c__Anaerolineae;o__SBR1031;f__A4b;g__;s__	905	5696120	1.70748	2.04	50	1.02	96.55	70	91.24
H51_512	>90% completeness AND <5% contamination	hotsprings	d__Bacteria;p__Chloroflexota;c__Anaerolineae;o__SBR1031;f__A4b;g__;s__	36	4381420	0	0	0	0	100	95	99
F14_30	>90% completeness AND <5% contamination	microbial mats	d__Bacteria;p__Chloroflexota;c__Anaerolineae;o__SBR1031;f__A4b;g__CAIRDJ01;s__	415	4725670	3.18981	0.69	0	0.69	100	85	97
F17_39	>90% completeness AND <5% contamination	microbial mats	d__Bacteria;p__Chloroflexota;c__Anaerolineae;o__SBR1031;f__A4b;g__CAIRDJ01;s__	378	3851460	3.13517	2.41	50	1.205	99.84	95	98.872
H11_51	>90% completeness AND <5% contamination	hotsprings	d__Bacteria;p__Chloroflexota;c__Anaerolineae;o__SBR1031;f__A4b;g__CFX2;s__	164	4917000	2.05593	0	0	0	96.55	100	97.24
H76_766	>90% completeness AND <5% contamination	hotsprings	d__Bacteria;p__Chloroflexota;c__Anaerolineae;o__SBR1031;f__A4b;g__CFX2;s__	90	7766500	4.19275	0	0	0	100	100	100
H89_877	>90% completeness AND <5% contamination	hotsprings	d__Bacteria;p__Chloroflexota;c__Anaerolineae;o__SBR1031;f__A4b;g__CFX2;s__	189	5671700	1.02826	0	0	0	100	90	98
H21_292	>90% completeness AND <5% contamination	hotsprings	d__Bacteria;p__Chloroflexota;c__Anaerolineae;o__SBR1031;f__A4b;g__CFX2;s__CFX2 sp013388735	183	4704180	1.24017	0	0	0	98.28	90	96.624
F11_7	>90% completeness AND <5% contamination	microbial mats	d__Bacteria;p__Chloroflexota;c__Anaerolineae;o__SBR1031;f__A4b;g__GCA-2699585;s__	96	3674980	0.651432	0	0	0	92.95	95	93.36
F14_25	>90% completeness AND <5% contamination	microbial mats	d__Bacteria;p__Chloroflexota;c__Anaerolineae;o__SBR1031;f__A4b;g__GCA-2699585;s__	202	4409700	0.642674	0	0	0	99.84	95	98.872
F14_28	>90% completeness AND <5% contamination	microbial mats	d__Bacteria;p__Chloroflexota;c__Anaerolineae;o__SBR1031;f__A4b;g__GCA-2699585;s__	493	4697280	1.53259	1.88	50	0.94	96.39	85	94.112
F20_76	>90% completeness AND <5% contamination	microbial mats	d__Bacteria;p__Chloroflexota;c__Anaerolineae;o__SBR1031;f__A4b;g__GCA-2699585;s__	902	6131310	1.08835	0	0	0	98.28	90	96.624
H71_743	>90% completeness AND <5% contamination	hotsprings	d__Bacteria;p__Chloroflexota;c__Anaerolineae;o__SBR1031;f__A4b;g__GCA-2699585;s__	253	3528170	1.49142	0	0	0	98.12	90	96.496
H113_104	>90% completeness AND <5% contamination	hotsprings	d__Bacteria;p__Chloroflexota;c__Anaerolineae;o__SBR1031;f__A4b;g__GCA-2702065;s__	181	4011850	3.49191	0	0	0	94.83	95	94.864
S13_85	>90% completeness AND <5% contamination	corals/sponges	d__Bacteria;p__Chloroflexota;c__Anaerolineae;o__SBR1031;f__A4b;g__GCA-2702065;s__	163	2833680	2.69896	0	0	0	100	100	100
S21_131	>90% completeness AND <5% contamination	corals/sponges	d__Bacteria;p__Chloroflexota;c__Anaerolineae;o__SBR1031;f__A4b;g__GCA-2702065;s__	524	3015330	1.33219	7.05	100	0	98.28	85	95.624
S24_146	>90% completeness AND <5% contamination	corals/sponges	d__Bacteria;p__Chloroflexota;c__Anaerolineae;o__SBR1031;f__A4b;g__GCA-2702065;s__	91	2991430	3.53978	0.86	0	0.86	100	100	100
S28_198	>90% completeness AND <5% contamination	corals/sponges	d__Bacteria;p__Chloroflexota;c__Anaerolineae;o__SBR1031;f__A4b;g__GCA-2702065;s__	17	3009790	2.43904	0	0	0	100	100	100
S32_264	>90% completeness AND <5% contamination	corals/sponges	d__Bacteria;p__Chloroflexota;c__Anaerolineae;o__SBR1031;f__A4b;g__GCA-2702065;s__	16	3265050	0	0	0	0	100	100	100
F18_66	>90% completeness AND <5% contamination	microbial mats	d__Bacteria;p__Chloroflexota;c__Anaerolineae;o__SBR1031;f__A4b;g__GCA-2794515;s__	332	4519860	1.32327	0	0	0	100	90	98
H110_65	>90% completeness AND <5% contamination	hotsprings	d__Bacteria;p__Chloroflexota;c__Anaerolineae;o__SBR1031;f__A4b;g__GCA-2794515;s__	119	4441750	0	0	0	0	100	95	99
H87_872	>90% completeness AND <5% contamination	hotsprings	d__Bacteria;p__Chloroflexota;c__Anaerolineae;o__SBR1031;f__A4b;g__GCA-2794595;s__GCA-2794595 sp002794595	310	4927390	0.661405	0	0	0	96.55	95	96.24
F14_20	>90% completeness AND <5% contamination	microbial mats	d__Bacteria;p__Chloroflexota;c__Anaerolineae;o__SBR1031;f__A4b;g__J038;s__	488	3797130	2.52691	1.88	0	1.88	92.53	80	90.024
F14_31	>90% completeness AND <5% contamination	microbial mats	d__Bacteria;p__Chloroflexota;c__Anaerolineae;o__SBR1031;f__A4b;g__J038;s__	195	4.18619e+06	2.98601	1.72	0	1.72	98.28	90	96.624
H16_184	>90% completeness AND <5% contamination	hotsprings	d__Bacteria;p__Chloroflexota;c__Anaerolineae;o__SBR1031;f__A4b;g__J038;s__J038 sp003696565	162	3767350	1.04875	0	0	0	98.28	85	95.624
H14_151	>90% completeness AND <5% contamination	hotsprings	d__Bacteria;p__Chloroflexota;c__Anaerolineae;o__SBR1031;f__A4b;g__JACAER01;s__	386	5904560	0.970267	0	0	0	100	90	98
F11_4	>90% completeness AND <5% contamination	microbial mats	d__Bacteria;p__Chloroflexota;c__Anaerolineae;o__SBR1031;f__A4b;g__OLB13;s__	384	4747170	0.253203	3.45	100	0	95.61	90	94.488
H89_878	>90% completeness AND <5% contamination	hotsprings	d__Bacteria;p__Chloroflexota;c__Anaerolineae;o__SBR1031;f__A4b;g__OLB13;s__	214	3587640	1.54726	0	0	0	95.77	90	94.616
F11_12	>90% completeness AND <5% contamination	microbial mats	d__Bacteria;p__Chloroflexota;c__Anaerolineae;o__SBR1031;f__A4b;g__OLB15;s__	486	5270110	0.217643	0	0	0	96.39	80	93.112
F18_61	>90% completeness AND <5% contamination	microbial mats	d__Bacteria;p__Chloroflexota;c__Anaerolineae;o__SBR1031;f__A4b;g__OLB15;s__	201	4219660	1.21977	0	0	0	100	95	99
F18_65	>90% completeness AND <5% contamination	microbial mats	d__Bacteria;p__Chloroflexota;c__Anaerolineae;o__SBR1031;f__A4b;g__OLB15;s__	141	4736750	0	0	0	0	100	95	99
F20_72	>90% completeness AND <5% contamination	microbial mats	d__Bacteria;p__Chloroflexota;c__Anaerolineae;o__SBR1031;f__A4b;g__OLB15;s__	146	5383490	2.7967	0	0	0	100	95	99
F3_97	>90% completeness AND <5% contamination	microbial mats	d__Bacteria;p__Chloroflexota;c__Anaerolineae;o__SBR1031;f__A4b;g__OLB15;s__	212	3626870	2.28434	0	0	0	100	100	100
H15_156	>90% completeness AND <5% contamination	hotsprings	d__Bacteria;p__Chloroflexota;c__Anaerolineae;o__SBR1031;f__A4b;g__OLB15;s__	497	3972740	0.674597	0	0	0	95.77	90	94.616
H28_391	>90% completeness AND <5% contamination	hotsprings	d__Bacteria;p__Chloroflexota;c__Anaerolineae;o__SBR1031;f__A4b;g__OLB15;s__	472	3703390	0.996654	3.45	0	3.45	96.39	80	93.112
H71_748	>90% completeness AND <5% contamination	hotsprings	d__Bacteria;p__Chloroflexota;c__Anaerolineae;o__SBR1031;f__A4b;g__OLB15;s__	121	4.10906e+06	3.23578	0	0	0	100	95	99
H76_765	>90% completeness AND <5% contamination	hotsprings	d__Bacteria;p__Chloroflexota;c__Anaerolineae;o__SBR1031;f__A4b;g__OLB15;s__	223	6998560	1.96626	0.31	0	0.31	98.28	95	97.624
H39_480	>90% completeness AND <5% contamination	hotsprings	d__Bacteria;p__Chloroflexota;c__Anaerolineae;o__SBR1031;f__A4b;g__OLB15;s__OLB15 sp011047115	25	5128070	0.0581115	0	0	0	98.28	95	97.624
S24_155	>90% completeness AND <5% contamination	corals/sponges	d__Bacteria;p__Chloroflexota;c__Anaerolineae;o__SBR1031;f__A4b;g__UBA6055;s__	125	4223520	2.49034	0.16	0	0.16	98.28	100	98.624
S29_213	>90% completeness AND <5% contamination	corals/sponges	d__Bacteria;p__Chloroflexota;c__Anaerolineae;o__SBR1031;f__A4b;g__UBA6055;s__	362	4254230	2.69849	0	0	0	98.28	95	97.624
S32_236	>90% completeness AND <5% contamination	corals/sponges	d__Bacteria;p__Chloroflexota;c__Anaerolineae;o__SBR1031;f__A4b;g__UBA6055;s__	606	3422620	1.65107	4.47	100	0	94.67	85	92.736
S35_287	>90% completeness AND <5% contamination	corals/sponges	d__Bacteria;p__Chloroflexota;c__Anaerolineae;o__SBR1031;f__A4b;g__UBA6055;s__	515	3691540	1.8025	8.78	100	0	96.39	95	96.112
S4_310	>90% completeness AND <5% contamination	corals/sponges	d__Bacteria;p__Chloroflexota;c__Anaerolineae;o__SBR1031;f__A4b;g__UBA6055;s__	218	4464450	3.42416	1.72	0	1.72	98.28	100	98.624
S7_360	>90% completeness AND <5% contamination	corals/sponges	d__Bacteria;p__Chloroflexota;c__Anaerolineae;o__SBR1031;f__A4b;g__UBA6055;s__	76	3759210	2.82586	3.45	0	3.45	98.12	95	97.496
S8_380	>90% completeness AND <5% contamination	corals/sponges	d__Bacteria;p__Chloroflexota;c__Anaerolineae;o__SBR1031;f__A4b;g__UBA6055;s__	227	4706140	2.1285	1.72	100	0	96.39	90	95.112
S25_170	>90% completeness AND <5% contamination	corals/sponges	d__Bacteria;p__Chloroflexota;c__Anaerolineae;o__SBR1031;f__A4b;g__UBA6055;s__UBA6055 sp009840575	102	3534800	3.23243	1.72	0	1.72	98.12	100	98.496
S10_54	>90% completeness AND <5% contamination	corals/sponges	d__Bacteria;p__Chloroflexota;c__Anaerolineae;o__SBR1031;f__A4b;g__UBA6055;s__UBA6055 sp009841405	259	4192540	3.11076	0	0	0	96.55	85	94.24
S3_222	>90% completeness AND <5% contamination	corals/sponges	d__Bacteria;p__Chloroflexota;c__Anaerolineae;o__SBR1031;f__A4b;g__WTGJ01;s__WTGJ01 sp011523615	406	2180650	0	0.16	0	0.16	92.24	85	90.792
R30_118	>90% completeness AND <5% contamination	bioreactor	d__Bacteria;p__Chloroflexota;c__Anaerolineae;o__SBR1031;f__A4b;g__ZC4RG36;s__ZC4RG36 sp003242205	79	4541770	0	0	0	0	100	95	99
H21_247	>90% completeness AND <5% contamination	hotsprings	d__Bacteria;p__Chloroflexota;c__Anaerolineae;o__SBR1031;f__Ch27;g__Ch27;s__	438	4491700	3.63136	1.72	0	1.72	95.29	95	95.232
N6_285	>90% completeness AND <5% contamination	high salt	d__Bacteria;p__Chloroflexota;c__Anaerolineae;o__SBR1031;f__Ch27;g__Ch27;s__	654	5776830	2.796	4.31	0	4.31	100	85	97
F14_21	>90% completeness AND <5% contamination	microbial mats	d__Bacteria;p__Chloroflexota;c__Anaerolineae;o__SBR1031;f__J027;g__J027;s__	139	4700890	0	1.72	0	1.72	100	90	98
H16_180	>90% completeness AND <5% contamination	hotsprings	d__Bacteria;p__Chloroflexota;c__Anaerolineae;o__SBR1031;f__J027;g__J027;s__J027 sp003697365	81	3158590	0	0	0	0	100	80	96
F7_116	>90% completeness AND <5% contamination	microbial mats	d__Bacteria;p__Chloroflexota;c__Anaerolineae;o__SBR1031;f__J027;g__JAAUUD01;s__	473	4491720	0	1.88	0	1.88	97.96	90	96.368
H15_152	>90% completeness AND <5% contamination	hotsprings	d__Bacteria;p__Chloroflexota;c__Anaerolineae;o__SBR1031;f__J027;g__SB15;s__SB15 sp008933735	338	5732130	0	2.59	50	1.295	100	95	99
R24_102	>90% completeness AND <5% contamination	bioreactor	d__Bacteria;p__Chloroflexota;c__Anaerolineae;o__SBR1031;f__UBA2029;g__;s__	356	5017990	3.37067	0	0	0	100	85	97
W58_125	>90% completeness AND <5% contamination	water	d__Bacteria;p__Chloroflexota;c__Anaerolineae;o__SBR1031;f__UBA2029;g__;s__	99	4344370	3.34318	0	0	0	100	95	99
F17_43	>90% completeness AND <5% contamination	microbial mats	d__Bacteria;p__Chloroflexota;c__Anaerolineae;o__SBR1031;f__UBA2029;g__TC-15;s__	202	4524950	3.52269	0	0	0	98.28	85	95.624
H61_594	>90% completeness AND <5% contamination	hotsprings	d__Bacteria;p__Chloroflexota;c__Anaerolineae;o__SBR1031;f__UBA2029;g__UBA2029;s__	393	4073840	3.33837	2.04	33.33	1.36007	94.36	85	92.488
H67_690	>90% completeness AND <5% contamination	hotsprings	d__Bacteria;p__Chloroflexota;c__Anaerolineae;o__SBR1031;f__UBA2029;g__UBA2029;s__	261	3763650	4.00409	0	0	0	100	90	98
H78_781	>90% completeness AND <5% contamination	hotsprings	d__Bacteria;p__Chloroflexota;c__Anaerolineae;o__SBR1031;f__UBA2029;g__UBA2029;s__	95	4213810	3.36062	0	0	0	100	100	100
M11_16	>90% completeness AND <5% contamination	marine	d__Bacteria;p__Chloroflexota;c__Anaerolineae;o__SBR1031;f__UBA2029;g__UBA2029;s__	202	4198930	4.77884	1.72	0	1.72	100	90	98
R15_66	>90% completeness AND <5% contamination	bioreactor	d__Bacteria;p__Chloroflexota;c__Anaerolineae;o__SBR1031;f__UBA2029;g__UBA2029;s__	68	3707050	0.728342	0	0	0	96.55	95	96.24
W58_121	>90% completeness AND <5% contamination	water	d__Bacteria;p__Chloroflexota;c__Anaerolineae;o__SBR1031;f__UBA2029;g__UBA2029;s__	357	4148260	1.17158	0	0	0	96.55	80	93.24
R21_68	>90% completeness AND <5% contamination	bioreactor	d__Bacteria;p__Chloroflexota;c__Anaerolineae;o__SBR1031;f__UBA2029;g__UBA2029;s__UBA2029 sp002332795	466	4.13756e+06	2.5457	1.72	100	0	96.55	80	93.24
H11_56	>90% completeness AND <5% contamination	hotsprings	d__Bacteria;p__Chloroflexota;c__Anaerolineae;o__SBR1031;f__UBA2796;g__CP2-2F;s__	41	4419190	0.133056	0	0	0	100	100	100
H110_66	>90% completeness AND <5% contamination	hotsprings	d__Bacteria;p__Chloroflexota;c__Anaerolineae;o__SBR1031;f__UBA2796;g__CP2-2F;s__	49	4272820	0	0	0	0	100	100	100
H112_101	>90% completeness AND <5% contamination	hotsprings	d__Bacteria;p__Chloroflexota;c__Anaerolineae;o__SBR1031;f__UBA2796;g__CP2-2F;s__	315	3804710	0	0.31	100	0	100	100	100
H38_472	>90% completeness AND <5% contamination	hotsprings	d__Bacteria;p__Chloroflexota;c__Anaerolineae;o__SBR1031;f__UBA2796;g__CP2-2F;s__	189	2838950	0	0	0	0	98.28	100	98.624
H71_754	>90% completeness AND <5% contamination	hotsprings	d__Bacteria;p__Chloroflexota;c__Anaerolineae;o__SBR1031;f__UBA2796;g__CP2-2F;s__	52	4082560	0	1.72	100	0	100	100	100
H101_6	>90% completeness AND <5% contamination	hotsprings	d__Bacteria;p__Chloroflexota;c__Anaerolineae;o__SBR1031;f__UBA2796;g__CP2-2F;s__CP2-2F sp003695215	80	3464740	0	0.16	0	0.16	100	100	100
F3_92	>90% completeness AND <5% contamination	microbial mats	d__Bacteria;p__Chloroflexota;c__Anaerolineae;o__SBR1031;f__UBA2796;g__UBA2796;s__UBA2796 sp002352035	34	4604140	0.623569	0	0	0	100	100	100
H21_280	>90% completeness AND <5% contamination	hotsprings	d__Bacteria;p__Chloroflexota;c__Anaerolineae;o__SBR1031;f__UBA3940;g__;s__	107	3864270	0.158892	0	0	0	100	100	100
H23_308	>90% completeness AND <5% contamination	hotsprings	d__Bacteria;p__Chloroflexota;c__Anaerolineae;o__SBR1031;f__UBA3940;g__DRKO01;s__	185	3383600	0	0	0	0	98.28	95	97.624
H23_319	>90% completeness AND <5% contamination	hotsprings	d__Bacteria;p__Chloroflexota;c__Anaerolineae;o__SBR1031;f__UBA3940;g__DRKO01;s__	120	3304050	0	0	0	0	100	90	98
H21_271	>90% completeness AND <5% contamination	hotsprings	d__Bacteria;p__Chloroflexota;c__Anaerolineae;o__SBR1031;f__UBA3940;g__UBA3940;s__	96	4219270	0.186525	0	0	0	100	90	98
H24_340	>90% completeness AND <5% contamination	hotsprings	d__Bacteria;p__Chloroflexota;c__Anaerolineae;o__SBR1031;f__UBA3940;g__UBA3940;s__	400	2659700	0	0	0	0	93.18	85	91.544
N6_304	>90% completeness AND <5% contamination	high salt	d__Bacteria;p__Chloroflexota;c__Anaerolineae;o__SBR1031;f__UBA3940;g__UBA3940;s__	448	3783910	0	2.59	100	0	96.55	75	92.24
H111_74	>90% completeness AND <5% contamination	hotsprings	d__Bacteria;p__Chloroflexota;c__Anaerolineae;o__SpSt-313;f__SpSt-313;g__;s__	369	5107900	0	3.45	0	3.45	92.95	85	91.36
R89_281	>90% completeness AND <5% contamination	bioreactor	d__Bacteria;p__Chloroflexota;c__Anaerolineae;o__SpSt-313;f__SpSt-313;g__;s__	337	5044180	0	1.72	0	1.72	96.39	90	95.112
H61_592	>90% completeness AND <5% contamination	hotsprings	d__Bacteria;p__Chloroflexota;c__Anaerolineae;o__SpSt-313;f__SpSt-313;g__SpSt-313;s__SpSt-313 sp011047295	501	4145210	0	5.33	60	2.132	96.39	90	95.112
H70_729	>90% completeness AND <5% contamination	hotsprings	d__Bacteria;p__Chloroflexota;c__Anaerolineae;o__SpSt-600;f__SpSt-600;g__SpSt-600;s__	355	2181780	0	0	0	0	98.98	95	98.184
H87_871	>90% completeness AND <5% contamination	hotsprings	d__Bacteria;p__Chloroflexota;c__Anaerolineae;o__SpSt-600;f__SpSt-600;g__SpSt-600;s__	298	1990780	0	0.86	100	0	93.81	95	94.048
H25_347	>90% completeness AND <5% contamination	hotsprings	d__Bacteria;p__Chloroflexota;c__Anaerolineae;o__SpSt-600;f__SpSt-600;g__SpSt-600;s__SpSt-600 sp011333005	148	2525210	0	0	0	0	100	95	99
H14_150	>90% completeness AND <5% contamination	hotsprings	d__Bacteria;p__Chloroflexota;c__Anaerolineae;o__SpSt-600;f__SpSt-600;g__SpSt-600;s__SpSt-600 sp011364775	117	2062600	0	0	0	0	99.84	100	99.872
H21_290	>90% completeness AND <5% contamination	hotsprings	d__Bacteria;p__Chloroflexota;c__Anaerolineae;o__Thermoflexales;f__Fen-1058;g__;s__	199	5397820	0.941306	0.16	100	0	98.12	100	98.496
H28_387	>90% completeness AND <5% contamination	hotsprings	d__Bacteria;p__Chloroflexota;c__Anaerolineae;o__Thermoflexales;f__J036;g__;s__	513	4043860	0	1.72	100	0	92.79	80	90.232
H89_890	>90% completeness AND <5% contamination	hotsprings	d__Bacteria;p__Chloroflexota;c__Anaerolineae;o__Thermoflexales;f__J036;g__;s__	375	4776770	0	0.86	100	0	94.67	85	92.736
R103_16	>90% completeness AND <5% contamination	bioreactor	d__Bacteria;p__Chloroflexota;c__Anaerolineae;o__Thermoflexales;f__J036;g__CAIXPS01;s__	203	5556980	0	3.45	0	3.45	98.12	95	97.496
H46_503	>90% completeness AND <5% contamination	hotsprings	d__Bacteria;p__Chloroflexota;c__Anaerolineae;o__Thermoflexales;f__J036;g__DRWP01;s__	173	2317150	0	0.16	100	0	96.24	95	95.992
H14_143	>90% completeness AND <5% contamination	hotsprings	d__Bacteria;p__Chloroflexota;c__Anaerolineae;o__Thermoflexales;f__J036;g__DRWP01;s__DRWP01 sp011373615	375	2300590	0	0	0	0	98.12	70	92.496
H35_457	>90% completeness AND <5% contamination	hotsprings	d__Bacteria;p__Chloroflexota;c__Anaerolineae;o__Thermoflexales;f__J036;g__Roseilinea;s__	382	2441470	0	3.45	50	1.725	90.91	90	90.728
H101_5	>90% completeness AND <5% contamination	hotsprings	d__Bacteria;p__Chloroflexota;c__Anaerolineae;o__Thermoflexales;f__J036;g__Roseilinea;s__Roseilinea sp003696945	106	3006620	0	0	0	0	97.65	95	97.12
H46_500	>90% completeness AND <5% contamination	hotsprings	d__Bacteria;p__Chloroflexota;c__Anaerolineae;o__Thermoflexales;f__Thermoflexaceae;g__Thermoflexus;s__	359	3627720	0.234031	0	0	0	96.55	95	96.24
H70_730	>90% completeness AND <5% contamination	hotsprings	d__Bacteria;p__Chloroflexota;c__Anaerolineae;o__Thermoflexales;f__Thermoflexaceae;g__Thermoflexus;s__	499	3743100	0	0	0	0	96.55	90	95.24
H31_407	>90% completeness AND <5% contamination	hotsprings	d__Bacteria;p__Chloroflexota;c__Anaerolineae;o__Thermoflexales;f__Thermoflexaceae;g__Thermoflexus;s__Thermoflexus hugenholtzii	283	2915860	0	0	0	0	96.55	90	95.24
M4_83	>90% completeness AND <5% contamination	marine	d__Bacteria;p__Chloroflexota;c__Anaerolineae;o__Thermoflexales;f__Thermoflexaceae;g__Thermoflexus;s__Thermoflexus hugenholtzii	64	3315830	1.06399	0	0	0	100	100	100
H81_814	>90% completeness AND <5% contamination	hotsprings	d__Bacteria;p__Chloroflexota;c__Anaerolineae;o__Thermoflexales;f__Thermoflexaceae;g__Thermoflexus;s__Thermoflexus sp011048055	121	3124640	0	0	0	0	98.28	95	97.624
H14_144	>90% completeness AND <5% contamination	hotsprings	d__Bacteria;p__Chloroflexota;c__Anaerolineae;o__Thermoflexales;f__Thermoflexaceae;g__Thermoflexus;s__Thermoflexus sp011373175	541	3565530	0	1.72	0	1.72	93.97	95	94.176
H6_558	>90% completeness AND <5% contamination	hotsprings	d__Bacteria;p__Chloroflexota;c__Anaerolineae;o__UBA1429;f__UBA1429;g__;s__	322	3248470	0	1.72	0	1.72	95.92	90	94.736
R69_160	>90% completeness AND <5% contamination	bioreactor	d__Bacteria;p__Chloroflexota;c__Anaerolineae;o__UBA1429;f__UBA1429;g__JAAZBY01;s__JAAZBY01 sp012513595	464	3797490	0	1.72	0	1.72	96.39	95	96.112
H111_70	>90% completeness AND <5% contamination	hotsprings	d__Bacteria;p__Chloroflexota;c__Anaerolineae;o__UBA1429;f__UBA1429;g__SpSt-996;s__SpSt-996 sp011332765	500	3696720	0	0	0	0	99.84	85	96.872
N9_381	>90% completeness AND <5% contamination	high salt	d__Bacteria;p__Chloroflexota;c__Anaerolineae;o__UBA2200;f__UBA2200;g__;s__	374	3398560	0	0.86	0	0.86	93.23	90	92.584
H27_366	>90% completeness AND <5% contamination	hotsprings	d__Bacteria;p__Chloroflexota;c__Anaerolineae;o__UBA3071;f__;g__;s__	260	2854070	2.26974	1.88	50	0.94	98.28	90	96.624
F3_93	>90% completeness AND <5% contamination	microbial mats	d__Bacteria;p__Chloroflexota;c__Anaerolineae;o__UBA4142;f__SHND01;g__SHND01;s__	518	4042780	0.03834	0	0	0	93.1	85	91.48
R115_27	>90% completeness AND <5% contamination	bioreactor	d__Bacteria;p__Chloroflexota;c__Anaerolineae;o__UBA4142;f__SHND01;g__SHND01;s__	198	4554720	0	0	0	0	93.1	95	93.48
H23_303	>90% completeness AND <5% contamination	hotsprings	d__Bacteria;p__Chloroflexota;c__Anaerolineae;o__UBA4142;f__UBA4142;g__;s__	347	3516550	0	0	0	0	98.12	100	98.496
H27_369	>90% completeness AND <5% contamination	hotsprings	d__Bacteria;p__Chloroflexota;c__Anaerolineae;o__UBA4142;f__UBA4142;g__;s__	336	3416790	0	0	0	0	94.67	95	94.736
H6_562	>90% completeness AND <5% contamination	hotsprings	d__Bacteria;p__Chloroflexota;c__Anaerolineae;o__UBA4142;f__UBA4142;g__;s__	490	3460450	0.677369	0	0	0	98.12	75	93.496
H63_652	>90% completeness AND <5% contamination	hotsprings	d__Bacteria;p__Chloroflexota;c__Anaerolineae;o__UBA4142;f__UBA4142;g__;s__	119	3681190	0	2.04	0	2.04	99.53	90	97.624
H103_18	>90% completeness AND <5% contamination	hotsprings	d__Bacteria;p__Chloroflexota;c__Anaerolineae;o__UBA4142;f__UBA4142;g__CAIKBD01;s__	431	3900140	0	3.29	8.33	3.01594	92.95	90	92.36
H81_806	>90% completeness AND <5% contamination	hotsprings	d__Bacteria;p__Chloroflexota;c__Anaerolineae;o__UBA4142;f__UBA4142;g__CAIKBD01;s__	689	3872690	0	7.99	41.67	4.66057	92.63	95	93.104
H21_272	>90% completeness AND <5% contamination	hotsprings	d__Bacteria;p__Chloroflexota;c__Anaerolineae;o__UBA4142;f__UBA4142;g__UBA4142;s__	98	4093330	0	2.51	33.33	1.67342	100	90	98
N9_380	>90% completeness AND <5% contamination	high salt	d__Bacteria;p__Chloroflexota;c__Anaerolineae;o__UBA7937;f__B3-Chlor;g__B3-Chlor;s__	430	3548080	0	0	0	0	96.39	85	94.112
W31_79	>90% completeness AND <5% contamination	water	d__Bacteria;p__Chloroflexota;c__Anaerolineae;o__UBA7937;f__B3-Chlor;g__B3-Chlor;s__	30	4051300	0	0	0	0	98.12	95	97.496
W31_47	>90% completeness AND <5% contamination	water	d__Bacteria;p__Chloroflexota;c__Anaerolineae;o__UBA7937;f__UBA7937;g__UBA7937;s__	252	3092320	0	5.64	50	2.82	96.55	85	94.24
M11_14	>90% completeness AND <5% contamination	marine	d__Bacteria;p__Chloroflexota;c__Anaerolineae;o__UCB3;f__;g__;s__	110	4308660	0	3.45	100	0	96.55	95	96.24
H81_833	>90% completeness AND <5% contamination	hotsprings	d__Bacteria;p__Chloroflexota;c__Anaerolineae;o__UCB3;f__UCB3;g__;s__	145	2801970	0	0	0	0	92.24	95	92.792
B3_56	>90% completeness AND <5% contamination	soil	d__Bacteria;p__Chloroflexota;c__Chloroflexia;o__54-19;f__;g__;s__	166	3150250	0	1.55	33.33	1.03338	95.53	95	95.424
F17_50	>90% completeness AND <5% contamination	microbial mats	d__Bacteria;p__Chloroflexota;c__Chloroflexia;o__Chloroflexales;f__Chloroflexaceae;g__;s__	311	7387230	0.775121	0	0	0	99.14	100	99.312
F17_55	>90% completeness AND <5% contamination	microbial mats	d__Bacteria;p__Chloroflexota;c__Chloroflexia;o__Chloroflexales;f__Chloroflexaceae;g__;s__	201	5758420	0.0751942	0.69	0	0.69	100	100	100
F7_114	>90% completeness AND <5% contamination	microbial mats	d__Bacteria;p__Chloroflexota;c__Chloroflexia;o__Chloroflexales;f__Chloroflexaceae;g__;s__	290	7693950	0	0	0	0	99.14	100	99.312
H101_12	>90% completeness AND <5% contamination	hotsprings	d__Bacteria;p__Chloroflexota;c__Chloroflexia;o__Chloroflexales;f__Chloroflexaceae;g__;s__	177	9024340	2.06275	3.45	0	3.45	99.14	95	98.312
H113_106	>90% completeness AND <5% contamination	hotsprings	d__Bacteria;p__Chloroflexota;c__Chloroflexia;o__Chloroflexales;f__Chloroflexaceae;g__;s__	191	5067540	1.23077	0	0	0	100	95	99
H80_802	>90% completeness AND <5% contamination	hotsprings	d__Bacteria;p__Chloroflexota;c__Chloroflexia;o__Chloroflexales;f__Chloroflexaceae;g__;s__	617	7117040	0.314457	0	0	0	99.14	90	97.312
W101_18	>90% completeness AND <5% contamination	water	d__Bacteria;p__Chloroflexota;c__Chloroflexia;o__Chloroflexales;f__Chloroflexaceae;g__CAIWXH01;s__CAIWXH01 sp903916565	293	4609600	3.8166	0.85	0	0.85	96.55	95	96.24
H11_55	>90% completeness AND <5% contamination	hotsprings	d__Bacteria;p__Chloroflexota;c__Chloroflexia;o__Chloroflexales;f__Chloroflexaceae;g__Chloroflexus;s__	731	4048130	0.656846	1	0	1	92.95	90	92.36
H12_130	>90% completeness AND <5% contamination	hotsprings	d__Bacteria;p__Chloroflexota;c__Chloroflexia;o__Chloroflexales;f__Chloroflexaceae;g__Chloroflexus;s__	362	4408680	0.642142	0.69	0	0.69	100	80	96
H46_501	>90% completeness AND <5% contamination	hotsprings	d__Bacteria;p__Chloroflexota;c__Chloroflexia;o__Chloroflexales;f__Chloroflexaceae;g__Chloroflexus;s__	764	4611330	0.644283	0.85	0	0.85	96.55	90	95.24
H59_547	>90% completeness AND <5% contamination	hotsprings	d__Bacteria;p__Chloroflexota;c__Chloroflexia;o__Chloroflexales;f__Chloroflexaceae;g__Chloroflexus;s__	149	4672160	0.225164	0.69	0	0.69	97.41	95	96.928
H62_640	>90% completeness AND <5% contamination	hotsprings	d__Bacteria;p__Chloroflexota;c__Chloroflexia;o__Chloroflexales;f__Chloroflexaceae;g__Chloroflexus;s__	214	4769130	0.819856	0.69	0	0.69	99.14	100	99.312
H69_720	>90% completeness AND <5% contamination	hotsprings	d__Bacteria;p__Chloroflexota;c__Chloroflexia;o__Chloroflexales;f__Chloroflexaceae;g__Chloroflexus;s__	255	4645100	1.00794	0.69	0	0.69	99.14	100	99.312
H78_777	>90% completeness AND <5% contamination	hotsprings	d__Bacteria;p__Chloroflexota;c__Chloroflexia;o__Chloroflexales;f__Chloroflexaceae;g__Chloroflexus;s__	80	4462650	3.46902	0.69	0	0.69	100	100	100
H89_891	>90% completeness AND <5% contamination	hotsprings	d__Bacteria;p__Chloroflexota;c__Chloroflexia;o__Chloroflexales;f__Chloroflexaceae;g__Chloroflexus;s__	79	4647390	0	0.69	0	0.69	99.14	90	97.312
H64_668	>90% completeness AND <5% contamination	hotsprings	d__Bacteria;p__Chloroflexota;c__Chloroflexia;o__Chloroflexales;f__Chloroflexaceae;g__Chloroflexus;s__Chloroflexus aurantiacus	165	4940520	2.31858	0.69	0	0.69	99.14	95	98.312
H68_715	>90% completeness AND <5% contamination	hotsprings	d__Bacteria;p__Chloroflexota;c__Chloroflexia;o__Chloroflexales;f__Chloroflexaceae;g__Chloroflexus;s__Chloroflexus aurantiacus	284	4780160	2.95388	0.69	0	0.69	99.14	100	99.312
H24_328	>90% completeness AND <5% contamination	hotsprings	d__Bacteria;p__Chloroflexota;c__Chloroflexia;o__Chloroflexales;f__Chloroflexaceae;g__Chloroflexus;s__Chloroflexus sp000516515	464	4462620	1.77855	0.69	0	0.69	100	90	98
H6_580	>90% completeness AND <5% contamination	hotsprings	d__Bacteria;p__Chloroflexota;c__Chloroflexia;o__Chloroflexales;f__Chloroflexaceae;g__Chloroflexus;s__Chloroflexus sp000735195	222	4199720	3.14521	0.69	0	0.69	100	100	100
F17_45	>90% completeness AND <5% contamination	microbial mats	d__Bacteria;p__Chloroflexota;c__Chloroflexia;o__Chloroflexales;f__Chloroflexaceae;g__JAAUSY01;s__	215	3864920	0.761723	0	0	0	98.28	100	98.624
F17_46	>90% completeness AND <5% contamination	microbial mats	d__Bacteria;p__Chloroflexota;c__Chloroflexia;o__Chloroflexales;f__Chloroflexaceae;g__JAAUSY01;s__	678	4305450	0.69052	0.16	0	0.16	92.55	80	90.04
F17_56	>90% completeness AND <5% contamination	microbial mats	d__Bacteria;p__Chloroflexota;c__Chloroflexia;o__Chloroflexales;f__Chloroflexaceae;g__JAAUSY01;s__	343	4647920	1.10114	0	0	0	99.14	90	97.312
H109_45	>90% completeness AND <5% contamination	hotsprings	d__Bacteria;p__Chloroflexota;c__Chloroflexia;o__Chloroflexales;f__Chloroflexaceae;g__JACAEO01;s__	645	4672720	1.23012	2.41	33.33	1.60675	97.41	85	94.928
H11_50	>90% completeness AND <5% contamination	hotsprings	d__Bacteria;p__Chloroflexota;c__Chloroflexia;o__Chloroflexales;f__Chloroflexaceae;g__JACAEO01;s__	994	4695090	0.327576	4.14	50	2.07	97.77	70	92.216
H23_301	>90% completeness AND <5% contamination	hotsprings	d__Bacteria;p__Chloroflexota;c__Chloroflexia;o__Chloroflexales;f__Chloroflexaceae;g__JACAEO01;s__	617	4934310	1.51896	0.69	0	0.69	95.69	85	93.552
H28_384	>90% completeness AND <5% contamination	hotsprings	d__Bacteria;p__Chloroflexota;c__Chloroflexia;o__Chloroflexales;f__Chloroflexaceae;g__JACAEO01;s__	681	4972540	1.11714	0.69	0	0.69	97.41	85	94.928
H35_453	>90% completeness AND <5% contamination	hotsprings	d__Bacteria;p__Chloroflexota;c__Chloroflexia;o__Chloroflexales;f__Chloroflexaceae;g__JACAEO01;s__	361	5001330	1.29366	0.69	0	0.69	96.55	85	94.24
H6_564	>90% completeness AND <5% contamination	hotsprings	d__Bacteria;p__Chloroflexota;c__Chloroflexia;o__Chloroflexales;f__Chloroflexaceae;g__JACAEO01;s__	265	5022900	2.02532	0.69	0	0.69	97.41	85	94.928
H71_758	>90% completeness AND <5% contamination	hotsprings	d__Bacteria;p__Chloroflexota;c__Chloroflexia;o__Chloroflexales;f__Chloroflexaceae;g__JACAEO01;s__	640	4576940	0.274638	0.69	0	0.69	94.36	75	90.488
H78_783	>90% completeness AND <5% contamination	hotsprings	d__Bacteria;p__Chloroflexota;c__Chloroflexia;o__Chloroflexales;f__Chloroflexaceae;g__JACAEO01;s__	427	4908820	1.85747	0.69	0	0.69	94.83	95	94.864
H89_884	>90% completeness AND <5% contamination	hotsprings	d__Bacteria;p__Chloroflexota;c__Chloroflexia;o__Chloroflexales;f__Chloroflexaceae;g__JACAEO01;s__	349	4957360	0.923879	0.69	0	0.69	95.69	85	93.552
H21_273	>90% completeness AND <5% contamination	hotsprings	d__Bacteria;p__Chloroflexota;c__Chloroflexia;o__Chloroflexales;f__Chloroflexaceae;g__JACAEO01;s__JACAEO01 sp013388805	545	5056610	1.39698	0.85	33.33	0.566695	99.14	100	99.312
R30_113	>90% completeness AND <5% contamination	bioreactor	d__Bacteria;p__Chloroflexota;c__Chloroflexia;o__Chloroflexales;f__Chloroflexaceae;g__OHK40;s__	998	6409710	0.545891	2.41	0	2.41	95.77	90	94.616
W100_13	>90% completeness AND <5% contamination	water	d__Bacteria;p__Chloroflexota;c__Chloroflexia;o__Chloroflexales;f__Chloroflexaceae;g__Oscillochloris;s__Oscillochloris sp903877945	515	4681120	2.35734	1.72	0	1.72	94.83	100	95.864
W101_21	>90% completeness AND <5% contamination	water	d__Bacteria;p__Chloroflexota;c__Chloroflexia;o__Chloroflexales;f__Chloroflexaceae;g__Oscillochloris;s__Oscillochloris sp903877945	769	6067790	1.50516	1.72	0	1.72	93.1	85	91.48
W42_91	>90% completeness AND <5% contamination	water	d__Bacteria;p__Chloroflexota;c__Chloroflexia;o__Chloroflexales;f__Chloroflexaceae;g__Oscillochloris;s__Oscillochloris sp903877945	680	5211860	2.95365	0	0	0	94.04	75	90.232
W100_16	>90% completeness AND <5% contamination	water	d__Bacteria;p__Chloroflexota;c__Chloroflexia;o__Chloroflexales;f__Chloroflexaceae;g__Oscillochloris;s__Oscillochloris sp903887465	423	4645280	1.56804	0	0	0	98.28	90	96.624
W103_23	>90% completeness AND <5% contamination	water	d__Bacteria;p__Chloroflexota;c__Chloroflexia;o__Chloroflexales;f__Chloroflexaceae;g__Oscillochloris;s__Oscillochloris sp903920315	616	5575730	1.91544	1.88	50	0.94	95.92	95	95.736
F5_108	>90% completeness AND <5% contamination	microbial mats	d__Bacteria;p__Chloroflexota;c__Chloroflexia;o__Chloroflexales;f__Chloroflexaceae;g__UBA1466;s__UBA1466 sp002325605	277	3354010	0	0	0	0	99.14	95	98.312
F20_78	>90% completeness AND <5% contamination	microbial mats	d__Bacteria;p__Chloroflexota;c__Chloroflexia;o__Chloroflexales;f__Herpetosiphonaceae;g__JACCRK01;s__	690	5663980	0.38171	0	0	0	89.66	95	90.728
F20_80	>90% completeness AND <5% contamination	microbial mats	d__Bacteria;p__Chloroflexota;c__Chloroflexia;o__Chloroflexales;f__Roseiflexaceae;g__;s__	318	6702900	0.362082	1.72	0	1.72	99.14	100	99.312
R30_119	>90% completeness AND <5% contamination	bioreactor	d__Bacteria;p__Chloroflexota;c__Chloroflexia;o__Chloroflexales;f__Roseiflexaceae;g__;s__	666	5171310	0.840019	2.59	0	2.59	98.28	70	92.624
H21_291	>90% completeness AND <5% contamination	hotsprings	d__Bacteria;p__Chloroflexota;c__Chloroflexia;o__Chloroflexales;f__Roseiflexaceae;g__JACAEQ01;s__JACAEQ01 sp013388755	164	5088800	2.70005	0	0	0	99.14	100	99.312
H12_131	>90% completeness AND <5% contamination	hotsprings	d__Bacteria;p__Chloroflexota;c__Chloroflexia;o__Chloroflexales;f__Roseiflexaceae;g__Roseiflexus;s__	1002	4869180	0.244394	0.47	33.33	0.313349	91.38	90	91.104
H69_722	>90% completeness AND <5% contamination	hotsprings	d__Bacteria;p__Chloroflexota;c__Chloroflexia;o__Chloroflexales;f__Roseiflexaceae;g__Roseiflexus;s__	122	4761000	0.0338164	0	0	0	99.14	100	99.312
H88_875	>90% completeness AND <5% contamination	hotsprings	d__Bacteria;p__Chloroflexota;c__Chloroflexia;o__Chloroflexales;f__Roseiflexaceae;g__Roseiflexus;s__Roseiflexus castenholzii	1097	4587320	0.969193	0	0	0	96.57	65	90.256
H89_882	>90% completeness AND <5% contamination	hotsprings	d__Bacteria;p__Chloroflexota;c__Chloroflexia;o__Chloroflexales;f__Roseiflexaceae;g__Roseiflexus;s__Roseiflexus castenholzii	317	5095520	3.53134	0	0	0	99.14	100	99.312
H63_651	>90% completeness AND <5% contamination	hotsprings	d__Bacteria;p__Chloroflexota;c__Chloroflexia;o__DTKN01;f__DTKN01;g__DRUS01;s__	176	2883930	0	0	0	0	96.55	95	96.24
H111_97	>90% completeness AND <5% contamination	hotsprings	d__Bacteria;p__Chloroflexota;c__Chloroflexia;o__DTKN01;f__DTKN01;g__DRUS01;s__DRUS01 sp011388535	188	2913560	0	1.72	100	0	94.83	80	91.864
H111_92	>90% completeness AND <5% contamination	hotsprings	d__Bacteria;p__Chloroflexota;c__Chloroflexia;o__DTKN01;f__DTKN01;g__DTKN01;s__DTKN01 sp011333455	79	2920720	0	0	0	0	98.28	95	97.624
B32_95	>90% completeness AND <5% contamination	soil	d__Bacteria;p__Chloroflexota;c__Thermomicrobia;o__Thermomicrobiales;f__;g__;s__	97	3870870	1.56425	0	0	0	100	95	99
M4_85	>90% completeness AND <5% contamination	marine	d__Bacteria;p__Chloroflexota;c__Thermomicrobia;o__Thermomicrobiales;f__;g__;s__	475	3599940	0.621121	3.95	25	2.9625	96.55	85	94.24
R72_194	>90% completeness AND <5% contamination	bioreactor	d__Bacteria;p__Chloroflexota;c__Thermomicrobia;o__Thermomicrobiales;f__Thermomicrobiaceae;g__Sphaerobacter;s__	333	3943780	0.563672	0	0	0	96.55	85	94.24
M4_87	>90% completeness AND <5% contamination	marine	d__Bacteria;p__Chloroflexota;c__Thermomicrobia;o__Thermomicrobiales;f__Thermomicrobiaceae;g__Sphaerobacter;s__Sphaerobacter thermophilus	208	3888810	2.44985	0	0	0	98.28	95	97.624
H14_148	>90% completeness AND <5% contamination	hotsprings	d__Bacteria;p__Chloroflexota;c__Thermomicrobia;o__Thermomicrobiales;f__Thermomicrobiaceae;g__Thermomicrobium;s__	482	2875950	1.9218	4.31	100	0	94.51	80	91.608
H24_335	>90% completeness AND <5% contamination	hotsprings	d__Bacteria;p__Chloroflexota;c__Thermomicrobia;o__Thermomicrobiales;f__Thermomicrobiaceae;g__Thermomicrobium;s__	479	2497490	0	1.72	100	0	96.55	75	92.24
H27_372	>90% completeness AND <5% contamination	hotsprings	d__Bacteria;p__Chloroflexota;c__Thermomicrobia;o__Thermomicrobiales;f__Thermomicrobiaceae;g__Thermomicrobium;s__Thermomicrobium roseum	279	2845170	1.76228	0	0	0	93.97	90	93.176
H29_399	>90% completeness AND <5% contamination	hotsprings	d__Bacteria;p__Chloroflexota;c__Thermomicrobia;o__Thermomicrobiales;f__Thermomicrobiaceae;g__Thermomicrobium;s__Thermomicrobium roseum	476	3154400	0	1.88	100	0	96.55	85	94.24
H33_424	>90% completeness AND <5% contamination	hotsprings	d__Bacteria;p__Chloroflexota;c__Thermomicrobia;o__Thermomicrobiales;f__Thermomicrobiaceae;g__Thermomicrobium;s__Thermomicrobium roseum	291	2780100	0.799612	0.86	100	0	98.28	90	96.624
H34_451	>90% completeness AND <5% contamination	hotsprings	d__Bacteria;p__Chloroflexota;c__Thermomicrobia;o__Thermomicrobiales;f__Thermomicrobiaceae;g__Thermomicrobium;s__Thermomicrobium roseum	70	2844500	4.03059	0	0	0	97.41	95	96.928
H81_819	>90% completeness AND <5% contamination	hotsprings	d__Bacteria;p__Chloroflexota;c__Thermomicrobia;o__Thermomicrobiales;f__Thermomicrobiaceae;g__Thermomicrobium;s__Thermomicrobium sp002898255	28	3169370	3.23913	0	0	0	98.28	95	97.624
M11_10	>90% completeness AND <5% contamination	marine	d__Bacteria;p__Chloroflexota;c__Thermomicrobia;o__Thermomicrobiales;f__UBA6265;g__JACCXM01;s__	128	5398050	2.04111	0	0	0	95.69	90	94.552
S13_80	>90% completeness AND <5% contamination	corals/sponges	d__Bacteria;p__Chloroflexota;c__Dehalococcoidia;o__Bin125;f__Bin125;g__;s__	22	2502200	0.214611	0	0	0	95.69	100	96.552
S5_323	>90% completeness AND <5% contamination	corals/sponges	d__Bacteria;p__Chloroflexota;c__Dehalococcoidia;o__Bin125;f__Bin125;g__;s__	58	2151550	0	0	0	0	93.97	100	95.176
S18_105	>90% completeness AND <5% contamination	corals/sponges	d__Bacteria;p__Chloroflexota;c__Dehalococcoidia;o__Bin125;f__Bin125;g__Bin125;s__	224	2441000	0	6.32	80	1.264	92.24	95	92.792
S2_114	>90% completeness AND <5% contamination	corals/sponges	d__Bacteria;p__Chloroflexota;c__Dehalococcoidia;o__Bin125;f__Bin125;g__Bin125;s__	351	2918780	0	6.03	83.33	1.0052	97.26	90	95.808
S24_145	>90% completeness AND <5% contamination	corals/sponges	d__Bacteria;p__Chloroflexota;c__Dehalococcoidia;o__Bin125;f__Bin125;g__Bin125;s__	42	2936660	0	1.72	0	1.72	93.97	95	94.176
S28_196	>90% completeness AND <5% contamination	corals/sponges	d__Bacteria;p__Chloroflexota;c__Dehalococcoidia;o__Bin125;f__Bin125;g__Bin125;s__	124	2953520	0	1.72	0	1.72	95.69	95	95.552
S7_353	>90% completeness AND <5% contamination	corals/sponges	d__Bacteria;p__Chloroflexota;c__Dehalococcoidia;o__Bin125;f__Bin125;g__Bin125;s__	120	2966790	0	5.17	33.33	3.44684	93.97	100	95.176
S38_297	>90% completeness AND <5% contamination	corals/sponges	d__Bacteria;p__Chloroflexota;c__Dehalococcoidia;o__Bin125;f__Bin125;g__Bin125;s__Bin125 sp002239025	77	3662540	0.0756306	1.72	0	1.72	93.97	90	93.176
S26_181	>90% completeness AND <5% contamination	corals/sponges	d__Bacteria;p__Chloroflexota;c__Dehalococcoidia;o__Bin125;f__Bin125;g__Bin125;s__Bin125 sp009838735	74	2969530	0	1.72	0	1.72	93.97	100	95.176
S26_175	>90% completeness AND <5% contamination	corals/sponges	d__Bacteria;p__Chloroflexota;c__Dehalococcoidia;o__Bin125;f__Bin125;g__Bin125;s__Bin125 sp009838915	46	2568360	0	1.72	0	1.72	90.52	90	90.416
S26_184	>90% completeness AND <5% contamination	corals/sponges	d__Bacteria;p__Chloroflexota;c__Dehalococcoidia;o__Bin125;f__Bin125;g__Bin125;s__Bin125 sp009838915	63	2637190	0	1.72	0	1.72	88.79	95	90.032
W53_106	>90% completeness AND <5% contamination	water	d__Bacteria;p__Chloroflexota;c__Dehalococcoidia;o__Dehalococcoidales;f__Dehalococcoidaceae;g__;s__	196	1419260	1.51487	1.72	0	1.72	90.99	90	90.792
R110_20	>90% completeness AND <5% contamination	bioreactor	d__Bacteria;p__Chloroflexota;c__Dehalococcoidia;o__Dehalococcoidales;f__Dehalococcoidaceae;g__Dehalococcoides;s__Dehalococcoides mccartyi	2	1373850	0	0	0	0	96.39	100	97.112
W55_110	>90% completeness AND <5% contamination	water	d__Bacteria;p__Chloroflexota;c__Dehalococcoidia;o__Dehalococcoidales;f__Dehalococcoidaceae;g__Dehalococcoides;s__Dehalococcoides mccartyi	2	1390160	0	0	0	0	96.39	100	97.112
W56_112	>90% completeness AND <5% contamination	water	d__Bacteria;p__Chloroflexota;c__Dehalococcoidia;o__Dehalococcoidales;f__Dehalococcoidaceae;g__Dehalococcoides;s__Dehalococcoides mccartyi_B	13	1531660	1.23396	0	0	0	96.55	100	97.24
W31_48	>90% completeness AND <5% contamination	water	d__Bacteria;p__Chloroflexota;c__Dehalococcoidia;o__Dehalococcoidales;f__E44-bin88;g__E44-bin88;s__	27	1734950	1.31243	1.72	50	0.86	95.69	100	96.552
W73_232	>90% completeness AND <5% contamination	water	d__Bacteria;p__Chloroflexota;c__Dehalococcoidia;o__Dehalococcoidales;f__E44-bin88;g__E44-bin88;s__	261	1224670	0.925964	0.31	50	0.155	91.38	85	90.104
W73_240	>90% completeness AND <5% contamination	water	d__Bacteria;p__Chloroflexota;c__Dehalococcoidia;o__Dehalococcoidales;f__E44-bin88;g__E44-bin88;s__	153	1414250	1.10306	3.16	33.33	2.10677	93.65	85	91.92
M58_240	>90% completeness AND <5% contamination	marine	d__Bacteria;p__Chloroflexota;c__Dehalococcoidia;o__Dehalococcoidales;f__Fen-1064;g__W589;s__W589 sp011170375	89	2414110	0	2.59	50	1.295	93.97	95	94.176
M58_225	>90% completeness AND <5% contamination	marine	d__Bacteria;p__Chloroflexota;c__Dehalococcoidia;o__Dehalococcoidales;f__Fen-1064;g__W589;s__W589 sp011171075	318	2362000	0	3.45	0	3.45	90.02	90	90.016
H23_307	>90% completeness AND <5% contamination	hotsprings	d__Bacteria;p__Chloroflexota;c__Dehalococcoidia;o__Dehalococcoidales;f__RBG-16-60-22;g__;s__	80	1618630	0	1.72	0	1.72	95.53	90	94.424
N14_66	>90% completeness AND <5% contamination	high salt	d__Bacteria;p__Chloroflexota;c__Dehalococcoidia;o__Dehalococcoidales;f__RBG-16-60-22;g__;s__	237	3446640	4.97093	1.72	0	1.72	91.22	90	90.976
N2_89	>90% completeness AND <5% contamination	high salt	d__Bacteria;p__Chloroflexota;c__Dehalococcoidia;o__Dehalococcoidales;f__RBG-16-60-22;g__;s__	150	1906470	0	3.95	75	0.9875	93.81	100	95.048
N3_157	>90% completeness AND <5% contamination	high salt	d__Bacteria;p__Chloroflexota;c__Dehalococcoidia;o__Dehalococcoidales;f__RBG-16-60-22;g__;s__	158	1955160	0	2.07	50	1.035	92.95	85	91.36
N5_247	>90% completeness AND <5% contamination	high salt	d__Bacteria;p__Chloroflexota;c__Dehalococcoidia;o__Dehalococcoidales;f__RBG-16-60-22;g__;s__	136	2144090	0	0	0	0	95.53	100	96.424
R24_90	>90% completeness AND <5% contamination	bioreactor	d__Bacteria;p__Chloroflexota;c__Dehalococcoidia;o__Dehalococcoidales;f__RBG-16-60-22;g__;s__	163	2612510	0	2.59	50	1.295	93.81	95	94.048
W31_63	>90% completeness AND <5% contamination	water	d__Bacteria;p__Chloroflexota;c__Dehalococcoidia;o__Dehalococcoidales;f__RBG-16-60-22;g__;s__	76	2246810	0	0	0	0	92.08	95	92.664
N2_108	>90% completeness AND <5% contamination	high salt	d__Bacteria;p__Chloroflexota;c__Dehalococcoidia;o__Dehalococcoidales;f__RBG-16-60-22;g__E44-bin89;s__	162	1525960	2.39521	0	0	0	97.26	85	94.808
W92_256	>90% completeness AND <5% contamination	water	d__Bacteria;p__Chloroflexota;c__Dehalococcoidia;o__Dehalococcoidales;f__RBG-16-60-22;g__E44-bin89;s__	25	1899270	0	0	0	0	92.95	95	93.36
M54_196	>90% completeness AND <5% contamination	marine	d__Bacteria;p__Chloroflexota;c__Dehalococcoidia;o__Dehalococcoidales;f__RBG-16-60-22;g__E44-bin89;s__E44-bin89 sp004375725	30	1743080	0	0	0	0	95.53	100	96.424
H81_827	>90% completeness AND <5% contamination	hotsprings	d__Bacteria;p__Chloroflexota;c__Dehalococcoidia;o__Dehalococcoidales;f__RBG-16-60-22;g__RBG-13-51-18;s__	130	1909370	0.0864159	0.16	100	0	95.53	100	96.424
W31_49	>90% completeness AND <5% contamination	water	d__Bacteria;p__Chloroflexota;c__Dehalococcoidia;o__Dehalococcoidales;f__RBG-16-60-22;g__RBG-13-51-18;s__	130	1877500	0	1.72	100	0	93.65	95	93.92
N5_259	>90% completeness AND <5% contamination	high salt	d__Bacteria;p__Chloroflexota;c__Dehalococcoidia;o__Dehalococcoidales;f__RBG-16-60-22;g__RBG-16-60-22;s__	294	1645380	2.88201	0.34	0	0.34	90.36	90	90.288
N6_293	>90% completeness AND <5% contamination	high salt	d__Bacteria;p__Chloroflexota;c__Dehalococcoidia;o__Dehalococcoidales;f__RBG-16-60-22;g__RBG-16-60-22;s__	109	1547780	4.1847	0	0	0	95.53	100	96.424
W31_45	>90% completeness AND <5% contamination	water	d__Bacteria;p__Chloroflexota;c__Dehalococcoidia;o__Dehalococcoidales;f__RBG-16-60-22;g__RBG-16-60-22;s__	117	1713580	0	2.74	0	2.74	95.53	100	96.424
N6_303	>90% completeness AND <5% contamination	high salt	d__Bacteria;p__Chloroflexota;c__Dehalococcoidia;o__Dehalococcoidales;f__RBG-16-60-22;g__W425;s__	129	2092580	0	2.59	50	1.295	92.08	100	93.664
M58_212	>90% completeness AND <5% contamination	marine	d__Bacteria;p__Chloroflexota;c__Dehalococcoidia;o__Dehalococcoidales;f__RBG-16-60-22;g__W425;s__W425 sp011192005	218	2427860	0	1.88	50	0.94	93.81	80	91.048
H66_676	>90% completeness AND <5% contamination	hotsprings	d__Bacteria;p__Chloroflexota;c__Dehalococcoidia;o__Dehalococcoidales;f__UBA2162;g__;s__	243	1970610	0	1.72	100	0	93.97	75	90.176
H85_868	>90% completeness AND <5% contamination	hotsprings	d__Bacteria;p__Chloroflexota;c__Dehalococcoidia;o__Dehalococcoidales;f__UBA2162;g__;s__	99	1713460	1.01024	0	0	0	90.05	95	91.04
N5_260	>90% completeness AND <5% contamination	high salt	d__Bacteria;p__Chloroflexota;c__Dehalococcoidia;o__Dehalococcoidales;f__UBA2162;g__MGML01;s__	347	3378790	0	0	0	0	92.24	85	90.792
W31_56	>90% completeness AND <5% contamination	water	d__Bacteria;p__Chloroflexota;c__Dehalococcoidia;o__Dehalococcoidales;f__UBA2162;g__MGML01;s__	36	3037220	1.63011	0	0	0	93.97	100	95.176
H66_684	>90% completeness AND <5% contamination	hotsprings	d__Bacteria;p__Chloroflexota;c__Dehalococcoidia;o__Dehalococcoidales;f__UBA3254;g__UBA3254;s__	402	2202200	0	0	0	0	95.06	85	93.048
R103_18	>90% completeness AND <5% contamination	bioreactor	d__Bacteria;p__Chloroflexota;c__Dehalococcoidia;o__Dehalococcoidales;f__UBA3254;g__UBA3254;s__	308	2327990	0	0.16	100	0	99.14	85	96.312
H61_605	>90% completeness AND <5% contamination	hotsprings	d__Bacteria;p__Chloroflexota;c__Dehalococcoidia;o__Dehalococcoidales;f__UBA3254;g__UBA3254;s__UBA3254 sp011328975	175	2575760	2.99523	0	0	0	97.41	90	95.928
H25_358	>90% completeness AND <5% contamination	hotsprings	d__Bacteria;p__Chloroflexota;c__Dehalococcoidia;o__Dehalococcoidales;f__UBA3254;g__UBA3254;s__UBA3254 sp011389395	189	2294910	0	1.72	100	0	91.38	90	91.104
R103_7	>90% completeness AND <5% contamination	bioreactor	d__Bacteria;p__Chloroflexota;c__Dehalococcoidia;o__Dehalococcoidales;f__UBA5627;g__;s__	39	1903110	2.8858	3.45	0	3.45	97.41	100	97.928
W31_74	>90% completeness AND <5% contamination	water	d__Bacteria;p__Chloroflexota;c__Dehalococcoidia;o__Dehalococcoidales;f__UBA5627;g__;s__	32	1509990	2.702	1.72	0	1.72	95.69	90	94.552
M54_197	>90% completeness AND <5% contamination	marine	d__Bacteria;p__Chloroflexota;c__Dehalococcoidia;o__Dehalococcoidales;f__UBA5627;g__W693;s__	42	1104080	4.08847	0	0	0	92.24	100	93.792
W53_108	>90% completeness AND <5% contamination	water	d__Bacteria;p__Chloroflexota;c__Dehalococcoidia;o__Dehalococcoidales;f__UBA5760;g__;s__	66	1076670	0	4.37	50	2.185	94.67	100	95.736
W31_71	>90% completeness AND <5% contamination	water	d__Bacteria;p__Chloroflexota;c__Dehalococcoidia;o__Dehalococcoidales;f__UBA5760;g__DUEB01;s__	26	1446990	0	0	0	0	93.97	85	92.176
N9_413	>90% completeness AND <5% contamination	high salt	d__Bacteria;p__Chloroflexota;c__Dehalococcoidia;o__Dehalococcoidales;f__UBA5760;g__E44-bin46;s__	166	1224030	1.74914	5.49	40	3.294	91.38	95	92.104
H61_618	>90% completeness AND <5% contamination	hotsprings	d__Bacteria;p__Chloroflexota;c__Dehalococcoidia;o__DSGV01;f__DSGV01;g__DSGV01;s__DSGV01 sp011057325	63	3698290	0	1.72	0	1.72	95.69	100	96.552
H82_849	>90% completeness AND <5% contamination	hotsprings	d__Bacteria;p__Chloroflexota;c__Dehalococcoidia;o__DSTF01;f__;g__;s__	139	2103700	0	0.86	100	0	93.97	80	91.176
N6_292	>90% completeness AND <5% contamination	high salt	d__Bacteria;p__Chloroflexota;c__Dehalococcoidia;o__DSTF01;f__;g__;s__	244	1609290	0	0	0	0	93.97	90	93.176
W31_46	>90% completeness AND <5% contamination	water	d__Bacteria;p__Chloroflexota;c__Dehalococcoidia;o__DSTF01;f__;g__;s__	259	3084170	0	0.34	100	0	97.26	80	93.808
H85_867	>90% completeness AND <5% contamination	hotsprings	d__Bacteria;p__Chloroflexota;c__Dehalococcoidia;o__GIF9;f__;g__;s__	127	1717350	0	0	0	0	91.38	90	91.104
W58_119	>90% completeness AND <5% contamination	water	d__Bacteria;p__Chloroflexota;c__Dehalococcoidia;o__GIF9;f__;g__;s__	45	1321000	0.597275	0	0	0	90.52	100	92.416
H78_785	>90% completeness AND <5% contamination	hotsprings	d__Bacteria;p__Chloroflexota;c__Dehalococcoidia;o__GIF9;f__AB-539-J10;g__;s__	43	1339770	0	0.86	0	0.86	93.97	100	95.176
N6_289	>90% completeness AND <5% contamination	high salt	d__Bacteria;p__Chloroflexota;c__Dehalococcoidia;o__GIF9;f__AB-539-J10;g__;s__	165	1713390	0	6.03	25	4.5225	90.17	100	92.136
W31_73	>90% completeness AND <5% contamination	water	d__Bacteria;p__Chloroflexota;c__Dehalococcoidia;o__GIF9;f__AB-539-J10;g__;s__	189	2168340	0	0.86	0	0.86	93.1	85	91.48
M62_259	>90% completeness AND <5% contamination	marine	d__Bacteria;p__Chloroflexota;c__Dehalococcoidia;o__GIF9;f__AB-539-J10;g__CG2-30-46-19;s__	28	1651250	0.13081	0.86	0	0.86	94.83	90	93.864
W31_72	>90% completeness AND <5% contamination	water	d__Bacteria;p__Chloroflexota;c__Dehalococcoidia;o__GIF9;f__AB-539-J10;g__CG2-30-46-19;s__	21	1513950	0	0.86	0	0.86	95.69	100	96.552
H25_350	>90% completeness AND <5% contamination	hotsprings	d__Bacteria;p__Chloroflexota;c__Dehalococcoidia;o__GIF9;f__AB-539-J10;g__DTMR01;s__DTMR01 sp011358865	45	1768350	0.177001	0.86	0	0.86	93.97	85	92.176
H55_530	>90% completeness AND <5% contamination	hotsprings	d__Bacteria;p__Chloroflexota;c__Dehalococcoidia;o__GIF9;f__UBA5620;g__9FT-COMBO-48-23;s__	341	1797740	0	3.45	100	0	92.24	90	91.792
H67_699	>90% completeness AND <5% contamination	hotsprings	d__Bacteria;p__Chloroflexota;c__Dehalococcoidia;o__GIF9;f__UBA5620;g__9FT-COMBO-48-23;s__	190	1479930	0	0	0	0	90.52	90	90.416
H12_119	>90% completeness AND <5% contamination	hotsprings	d__Bacteria;p__Chloroflexota;c__Dehalococcoidia;o__GIF9;f__UBA5620;g__SpSt-1004;s__	35	1441630	2.23636	0	0	0	88.79	95	90.032
H62_637	>90% completeness AND <5% contamination	hotsprings	d__Bacteria;p__Chloroflexota;c__Dehalococcoidia;o__GIF9;f__UBA5620;g__SpSt-1004;s__	155	1559850	0	0	0	0	97.41	95	96.928
H25_354	>90% completeness AND <5% contamination	hotsprings	d__Bacteria;p__Chloroflexota;c__Dehalococcoidia;o__GIF9;f__UBA5620;g__SpSt-1004;s__SpSt-1004 sp011333645	99	1397300	0	0	0	0	90.52	100	92.416
H85_861	>90% completeness AND <5% contamination	hotsprings	d__Bacteria;p__Chloroflexota;c__Dehalococcoidia;o__GIF9;f__UBA5620;g__SpSt-1004;s__SpSt-1004 sp011333645	75	1628800	0.456164	1.72	100	0	96.55	95	96.24
M58_238	>90% completeness AND <5% contamination	marine	d__Bacteria;p__Chloroflexota;c__Dehalococcoidia;o__GIF9;f__UBA5620;g__W265;s__W265 sp011170325	244	1486470	0	2.04	0	2.04	95.69	85	93.552
H67_695	>90% completeness AND <5% contamination	hotsprings	d__Bacteria;p__Chloroflexota;c__Dehalococcoidia;o__GIF9;f__UBA5629;g__;s__	241	2156060	0	3.45	0	3.45	92.24	95	92.792
R125_62	>90% completeness AND <5% contamination	bioreactor	d__Bacteria;p__Chloroflexota;c__Dehalococcoidia;o__GIF9;f__UBA5629;g__CAIMUM01;s__	123	2504620	0	3.45	50	1.725	99.14	100	99.312
R24_101	>90% completeness AND <5% contamination	bioreactor	d__Bacteria;p__Chloroflexota;c__Dehalococcoidia;o__GIF9;f__UBA5629;g__CAIMUM01;s__	196	2537150	0	1.72	0	1.72	97.41	85	94.928
H111_81	>90% completeness AND <5% contamination	hotsprings	d__Bacteria;p__Chloroflexota;c__Dehalococcoidia;o__GIF9;f__UBA5629;g__SpSt-828;s__SpSt-828 sp011370585	82	1855050	0	0	0	0	99.14	100	99.312
S7_356	>90% completeness AND <5% contamination	corals/sponges	d__Bacteria;p__Chloroflexota;c__Dehalococcoidia;o__Plut-88900;f__Plut-88900;g__Plut-88900;s__	69	2839770	0	0	0	0	95.69	95	95.552
S32_262	>90% completeness AND <5% contamination	corals/sponges	d__Bacteria;p__Chloroflexota;c__Dehalococcoidia;o__SAR202;f__UBA11138;g__;s__	84	3042690	0	0	0	0	99.14	100	99.312
S34_284	>90% completeness AND <5% contamination	corals/sponges	d__Bacteria;p__Chloroflexota;c__Dehalococcoidia;o__SAR202;f__UBA11138;g__;s__	97	3423200	0	1.72	0	1.72	98.28	100	98.624
S20_128	>90% completeness AND <5% contamination	corals/sponges	d__Bacteria;p__Chloroflexota;c__Dehalococcoidia;o__SAR202;f__UBA11138;g__Bin90;s__	518	3047900	0	1.72	0	1.72	92.95	80	90.36
S7_351	>90% completeness AND <5% contamination	corals/sponges	d__Bacteria;p__Chloroflexota;c__Dehalococcoidia;o__SAR202;f__UBA11138;g__Bin90;s__	27	3046950	0	1.72	0	1.72	97.41	100	97.928
S8_369	>90% completeness AND <5% contamination	corals/sponges	d__Bacteria;p__Chloroflexota;c__Dehalococcoidia;o__SAR202;f__UBA11138;g__Bin90;s__	36	3703830	0.543221	3.76	0	3.76	97.41	100	97.928
S38_296	>90% completeness AND <5% contamination	corals/sponges	d__Bacteria;p__Chloroflexota;c__Dehalococcoidia;o__SAR202;f__UBA11138;g__Bin90;s__Bin90 sp002238855	698	4376660	0	3.13	0	3.13	93.97	85	92.176
S25_167	>90% completeness AND <5% contamination	corals/sponges	d__Bacteria;p__Chloroflexota;c__Dehalococcoidia;o__SAR202;f__UBA11138;g__Bin90;s__Bin90 sp009840355	47	3500870	0.207377	3.45	0	3.45	97.41	100	97.928
S9_416	>90% completeness AND <5% contamination	corals/sponges	d__Bacteria;p__Chloroflexota;c__Dehalococcoidia;o__SAR202;f__UBA11138;g__Bin90;s__Bin90 sp009840355	43	3128300	0	2.51	0	2.51	97.41	100	97.928
S1_7	>90% completeness AND <5% contamination	corals/sponges	d__Bacteria;p__Chloroflexota;c__Dehalococcoidia;o__SAR202;f__UBA11138;g__JAAXHZ01;s__	309	3888250	0	2.41	0	2.41	93.97	95	94.176
S8_362	>90% completeness AND <5% contamination	corals/sponges	d__Bacteria;p__Chloroflexota;c__Dehalococcoidia;o__SAR202;f__UBA11138;g__JAAXHZ01;s__	28	3162150	0	2.59	0	2.59	93.97	100	95.176
S8_384	>90% completeness AND <5% contamination	corals/sponges	d__Bacteria;p__Chloroflexota;c__Dehalococcoidia;o__SAR202;f__UBA11138;g__VXRN01;s__	285	3376350	0	3.45	0	3.45	95.38	100	96.304
S5_329	>90% completeness AND <5% contamination	corals/sponges	d__Bacteria;p__Chloroflexota;c__Dehalococcoidia;o__SAR202;f__UBA2962;g__;s__	21	2379280	0	1.72	33.33	1.14672	99.14	100	99.312
H63_664	>90% completeness AND <5% contamination	hotsprings	d__Bacteria;p__Chloroflexota;c__Dehalococcoidia;o__SAR202;f__VXLM01;g__;s__	117	3549910	0	0	0	0	98.28	95	97.624
S8_375	>90% completeness AND <5% contamination	corals/sponges	d__Bacteria;p__Chloroflexota;c__Dehalococcoidia;o__SAR202;f__VXLM01;g__;s__	99	3145410	0	1.72	0	1.72	88.79	100	91.032
S25_171	>90% completeness AND <5% contamination	corals/sponges	d__Bacteria;p__Chloroflexota;c__Dehalococcoidia;o__SAR202;f__VXLM01;g__VXLM01;s__	557	2889290	0	0	0	0	92.24	85	90.792
S32_247	>90% completeness AND <5% contamination	corals/sponges	d__Bacteria;p__Chloroflexota;c__Dehalococcoidia;o__SAR202;f__VXLM01;g__VXLM01;s__	49	3317640	0	0	0	0	95.69	100	96.552
S5_317	>90% completeness AND <5% contamination	corals/sponges	d__Bacteria;p__Chloroflexota;c__Dehalococcoidia;o__SAR202;f__VXLM01;g__VXLM01;s__	82	3354230	0	0	0	0	95.69	100	96.552
S26_183	>90% completeness AND <5% contamination	corals/sponges	d__Bacteria;p__Chloroflexota;c__Dehalococcoidia;o__SAR202;f__VXLM01;g__VXLM01;s__VXLM01 sp009841605	214	3190190	0	0	0	0	97.41	85	94.928
S9_412	>90% completeness AND <5% contamination	corals/sponges	d__Bacteria;p__Chloroflexota;c__Dehalococcoidia;o__SAR202;f__VXLM01;g__VXLM01;s__VXLM01 sp009841605	184	3311970	0	0	0	0	97.41	100	97.928
S5_318	>90% completeness AND <5% contamination	corals/sponges	d__Bacteria;p__Chloroflexota;c__Dehalococcoidia;o__SHYB01;f__SHYB01;g__;s__	103	3130230	0	0.31	0	0.31	100	100	100
S8_371	>90% completeness AND <5% contamination	corals/sponges	d__Bacteria;p__Chloroflexota;c__Dehalococcoidia;o__SHYB01;f__SHYB01;g__;s__	262	2679930	0	0.16	0	0.16	93.1	90	92.48
H48_508	>90% completeness AND <5% contamination	hotsprings	d__Bacteria;p__Chloroflexota;c__Dehalococcoidia;o__SM23-28-2;f__HRbin24;g__DRWY01;s__	182	1692010	0	0	0	0	93.97	95	94.176
H84_856	>90% completeness AND <5% contamination	hotsprings	d__Bacteria;p__Chloroflexota;c__Dehalococcoidia;o__SM23-28-2;f__HRbin24;g__DRWY01;s__DRWY01 sp011373495	150	1598150	0	0	0	0	93.97	95	94.176
B32_94	>90% completeness AND <5% contamination	soil	d__Bacteria;p__Chloroflexota;c__Dehalococcoidia;o__SM23-28-2;f__HRbin24;g__HRBIN24;s__HRBIN24 sp002898715	218	1889480	0	0	0	0	93.97	80	91.176
H61_615	>90% completeness AND <5% contamination	hotsprings	d__Bacteria;p__Chloroflexota;c__Dehalococcoidia;o__SM23-28-2;f__HRbin24;g__HRBIN24;s__HRBIN24 sp002898715	60	2093250	0	0	0	0	99.14	100	99.312
H61_619	>90% completeness AND <5% contamination	hotsprings	d__Bacteria;p__Chloroflexota;c__Dehalococcoidia;o__SM23-28-2;f__HRbin24;g__HRBIN24;s__HRBIN24 sp011047455	87	2178620	0	2.04	66.67	0.679932	97.41	95	96.928
H61_617	>90% completeness AND <5% contamination	hotsprings	d__Bacteria;p__Chloroflexota;c__Dehalococcoidia;o__SM23-28-2;f__HRbin24;g__HRBIN24;s__HRBIN24 sp011380505	79	1809930	0	0	0	0	95.69	95	95.552
H17_190	>90% completeness AND <5% contamination	hotsprings	d__Bacteria;p__Chloroflexota;c__Dehalococcoidia;o__SM23-28-2;f__HRbin24;g__HRBIN25;s__HRBIN25 sp002898615	92	2107160	0	0	0	0	95.69	95	95.552
H81_835	>90% completeness AND <5% contamination	hotsprings	d__Bacteria;p__Chloroflexota;c__Dehalococcoidia;o__SM23-28-2;f__HRbin24;g__HRBIN25;s__HRBIN25 sp002898615	32	2228890	0	0	0	0	95.69	95	95.552
H60_584	>90% completeness AND <5% contamination	hotsprings	d__Bacteria;p__Chloroflexota;c__Dehalococcoidia;o__SM23-28-2;f__RBG-16-64-32;g__;s__	135	2447000	0	0.16	0	0.16	90.52	95	91.416
H62_633	>90% completeness AND <5% contamination	hotsprings	d__Bacteria;p__Chloroflexota;c__Dehalococcoidia;o__SM23-28-2;f__RBG-16-64-32;g__;s__	303	2001380	0	0.31	50	0.155	96.72	95	96.376
H63_647	>90% completeness AND <5% contamination	hotsprings	d__Bacteria;p__Chloroflexota;c__Dehalococcoidia;o__SM23-28-2;f__RBG-16-64-32;g__;s__	279	1893970	0	1.72	0	1.72	95.38	95	95.304
H68_705	>90% completeness AND <5% contamination	hotsprings	d__Bacteria;p__Chloroflexota;c__Dehalococcoidia;o__SM23-28-2;f__RBG-16-64-32;g__;s__	92	2217750	0	0.31	0	0.31	100	85	97
W31_80	>90% completeness AND <5% contamination	water	d__Bacteria;p__Chloroflexota;c__Dehalococcoidia;o__SM23-28-2;f__RBG-16-64-32;g__RBG-16-64-32;s__	224	2343200	0	3.92	60	1.568	95.69	80	92.552
W92_284	>90% completeness AND <5% contamination	water	d__Bacteria;p__Chloroflexota;c__Dehalococcoidia;o__SM23-28-2;f__RBG-16-64-32;g__RBG-16-64-32;s__	25	2706480	0	0	0	0	95.69	95	95.552
M62_289	>90% completeness AND <5% contamination	marine	d__Bacteria;p__Chloroflexota;c__Dehalococcoidia;o__SM23-28-2;f__SM23-28-2;g__SM23-28-2;s__	415	1940380	0	1.72	100	0	93.81	80	91.048
N9_412	>90% completeness AND <5% contamination	high salt	d__Bacteria;p__Chloroflexota;c__Dehalococcoidia;o__SM23-28-2;f__SM23-28-2;g__SM23-28-2;s__	45	1963500	0	0	0	0	95.69	100	96.552
H24_334	>90% completeness AND <5% contamination	hotsprings	d__Bacteria;p__Chloroflexota;c__Dehalococcoidia;o__SpSt-223;f__SpSt-223;g__SpSt-223;s__	196	2845700	0.595987	0	0	0	97.41	95	96.928
H81_820	>90% completeness AND <5% contamination	hotsprings	d__Bacteria;p__Chloroflexota;c__Dehalococcoidia;o__SpSt-223;f__SpSt-223;g__SpSt-223;s__	322	2486420	0	0.16	100	0	97.41	90	95.928
H61_609	>90% completeness AND <5% contamination	hotsprings	d__Bacteria;p__Chloroflexota;c__Dehalococcoidia;o__SpSt-223;f__SpSt-223;g__SpSt-223;s__SpSt-223 sp011053995	81	2783190	0.175338	0	0	0	97.41	95	96.928
H23_298	>90% completeness AND <5% contamination	hotsprings	d__Bacteria;p__Chloroflexota;c__Dehalococcoidia;o__SZUA-161;f__;g__;s__	115	1177880	0	0	0	0	97.41	95	96.928
M7_302	>90% completeness AND <5% contamination	marine	d__Bacteria;p__Chloroflexota;c__Dehalococcoidia;o__SZUA-161;f__E44-bin15;g__;s__	93	1560060	0	1.72	100	0	93.65	90	92.92
N11_13	>90% completeness AND <5% contamination	high salt	d__Bacteria;p__Chloroflexota;c__Dehalococcoidia;o__SZUA-161;f__E44-bin15;g__;s__	370	1421730	0	4.47	75	1.1175	97.18	75	92.744
N3_167	>90% completeness AND <5% contamination	high salt	d__Bacteria;p__Chloroflexota;c__Dehalococcoidia;o__SZUA-161;f__E44-bin15;g__;s__	319	2532430	0	3.61	33.33	2.40679	95.53	85	93.424
N7_337	>90% completeness AND <5% contamination	high salt	d__Bacteria;p__Chloroflexota;c__Dehalococcoidia;o__SZUA-161;f__E44-bin15;g__;s__	172	1917900	0	0	0	0	98.98	100	99.184
W6_131	>90% completeness AND <5% contamination	water	d__Bacteria;p__Chloroflexota;c__Dehalococcoidia;o__SZUA-161;f__E44-bin15;g__;s__	223	2249080	0	0	0	0	92.02	100	93.616
W31_65	>90% completeness AND <5% contamination	water	d__Bacteria;p__Chloroflexota;c__Dehalococcoidia;o__SZUA-161;f__SpSt-899;g__;s__	21	2809620	0	0	0	0	96.55	100	97.24
H25_356	>90% completeness AND <5% contamination	hotsprings	d__Bacteria;p__Chloroflexota;c__Dehalococcoidia;o__SZUA-161;f__SpSt-899;g__SpSt-899;s__SpSt-899 sp011358905	62	2294940	0	1.72	100	0	95.69	100	96.552
W92_261	>90% completeness AND <5% contamination	water	d__Bacteria;p__Chloroflexota;c__Dehalococcoidia;o__SZUA-161;f__SZUA-161;g__;s__	326	2537210	0	3.61	33.33	2.40679	91.38	95	92.104
M58_232	>90% completeness AND <5% contamination	marine	d__Bacteria;p__Chloroflexota;c__Dehalococcoidia;o__SZUA-161;f__SZUA-161;g__W281;s__W281 sp011174795	201	1913160	0	1.88	100	0	93.97	85	92.176
S34_275	>90% completeness AND <5% contamination	corals/sponges	d__Bacteria;p__Chloroflexota;c__Dehalococcoidia;o__UBA1127;f__UBA1127;g__UBA1127;s__	23	2328340	0	0	0	0	97.41	95	96.928
S32_243	>90% completeness AND <5% contamination	corals/sponges	d__Bacteria;p__Chloroflexota;c__Dehalococcoidia;o__UBA1151;f__Bin127;g__Bin127;s__	132	2628530	0	0	0	0	96.55	100	97.24
S38_299	>90% completeness AND <5% contamination	corals/sponges	d__Bacteria;p__Chloroflexota;c__Dehalococcoidia;o__UBA1151;f__Bin127;g__Bin127;s__Bin127 sp002239045	31	2814640	0	0	0	0	98.79	100	99.032
S7_336	>90% completeness AND <5% contamination	corals/sponges	d__Bacteria;p__Chloroflexota;c__Dehalococcoidia;o__UBA1151;f__SHXW01;g__;s__	47	3078990	0	0	0	0	99.14	100	99.312
S34_282	>90% completeness AND <5% contamination	corals/sponges	d__Bacteria;p__Chloroflexota;c__Dehalococcoidia;o__UBA2963;f__UBA2963;g__;s__	75	1603020	0	0	0	0	95.69	90	94.552
S7_352	>90% completeness AND <5% contamination	corals/sponges	d__Bacteria;p__Chloroflexota;c__Dehalococcoidia;o__UBA2963;f__UBA2963;g__;s__	20	1743000	0	0	0	0	92.24	100	93.792
S16_96	>90% completeness AND <5% contamination	corals/sponges	d__Bacteria;p__Chloroflexota;c__Dehalococcoidia;o__UBA2963;f__UBA2963;g__Bin16;s__	191	2788920	0	0.86	100	0	93.97	100	95.176
S18_111	>90% completeness AND <5% contamination	corals/sponges	d__Bacteria;p__Chloroflexota;c__Dehalococcoidia;o__UBA2963;f__UBA2963;g__Bin16;s__	204	2697280	0	0.86	100	0	88.79	95	90.032
S28_203	>90% completeness AND <5% contamination	corals/sponges	d__Bacteria;p__Chloroflexota;c__Dehalococcoidia;o__UBA2963;f__UBA2963;g__Bin16;s__	122	2749330	0	0	0	0	97.41	90	95.928
S32_235	>90% completeness AND <5% contamination	corals/sponges	d__Bacteria;p__Chloroflexota;c__Dehalococcoidia;o__UBA2963;f__UBA2963;g__Bin16;s__	89	2920820	0	0	0	0	97.41	95	96.928
S32_261	>90% completeness AND <5% contamination	corals/sponges	d__Bacteria;p__Chloroflexota;c__Dehalococcoidia;o__UBA2963;f__UBA2963;g__Bin16;s__	75	2911930	0	1.72	100	0	99.14	100	99.312
S34_268	>90% completeness AND <5% contamination	corals/sponges	d__Bacteria;p__Chloroflexota;c__Dehalococcoidia;o__UBA2963;f__UBA2963;g__Bin16;s__	18	2931980	0	3.45	0	3.45	99.14	100	99.312
S5_327	>90% completeness AND <5% contamination	corals/sponges	d__Bacteria;p__Chloroflexota;c__Dehalococcoidia;o__UBA2963;f__UBA2963;g__Bin16;s__	102	2476170	0	0	0	0	95.69	100	96.552
S12_75	>90% completeness AND <5% contamination	corals/sponges	d__Bacteria;p__Chloroflexota;c__Dehalococcoidia;o__UBA2963;f__UBA2963;g__Bin16;s__Bin16 sp002238425	108	3049310	0	0	0	0	97.41	100	97.928
S9_413	>90% completeness AND <5% contamination	corals/sponges	d__Bacteria;p__Chloroflexota;c__Dehalococcoidia;o__UBA2963;f__UBA2963;g__Bin16;s__Bin16 sp009838965	327	2570280	0	0	0	0	97.41	100	97.928
S8_381	>90% completeness AND <5% contamination	corals/sponges	d__Bacteria;p__Chloroflexota;c__Dehalococcoidia;o__UBA2979;f__UBA2979;g__VXMT01;s__	222	2318180	0	0	0	0	92.24	85	90.792
S26_182	>90% completeness AND <5% contamination	corals/sponges	d__Bacteria;p__Chloroflexota;c__Dehalococcoidia;o__UBA2979;f__UBA2979;g__VXMT01;s__VXMT01 sp009837285	105	2300610	0	0	0	0	90.52	95	91.416
S10_52	>90% completeness AND <5% contamination	corals/sponges	d__Bacteria;p__Chloroflexota;c__Dehalococcoidia;o__UBA2979;f__UBA2979;g__VXMT01;s__VXMT01 sp009840945	167	2383840	0	1.88	50	0.94	91.38	90	91.104
S36_294	>90% completeness AND <5% contamination	corals/sponges	d__Bacteria;p__Chloroflexota;c__Dehalococcoidia;o__UBA2979;f__UBA2979;g__VYDC01;s__	149	2287900	0	0	0	0	93.97	75	90.176
S8_388	>90% completeness AND <5% contamination	corals/sponges	d__Bacteria;p__Chloroflexota;c__Dehalococcoidia;o__UBA2979;f__UBA2979;g__VYDC01;s__	290	2341530	0	2.59	100	0	93.1	95	93.48
S8_393	>90% completeness AND <5% contamination	corals/sponges	d__Bacteria;p__Chloroflexota;c__Dehalococcoidia;o__UBA2979;f__UBA2979;g__VYDC01;s__VYDC01 sp009843585	211	2215090	0	1.72	0	1.72	95.69	85	93.552
S28_205	>90% completeness AND <5% contamination	corals/sponges	d__Bacteria;p__Chloroflexota;c__Dehalococcoidia;o__UBA2985;f__UBA2985;g__VEXC01;s__	14	1917820	0	0	0	0	95.69	100	96.552
S32_241	>90% completeness AND <5% contamination	corals/sponges	d__Bacteria;p__Chloroflexota;c__Dehalococcoidia;o__UBA2985;f__UBA2985;g__VEXC01;s__	24	1981930	0	0	0	0	97.41	95	96.928
S34_281	>90% completeness AND <5% contamination	corals/sponges	d__Bacteria;p__Chloroflexota;c__Dehalococcoidia;o__UBA2985;f__UBA2985;g__VEXC01;s__	26	2313750	0	0	0	0	99.14	100	99.312
S5_322	>90% completeness AND <5% contamination	corals/sponges	d__Bacteria;p__Chloroflexota;c__Dehalococcoidia;o__UBA2985;f__UBA2985;g__VEXC01;s__	87	1879410	0	0	0	0	97.41	100	97.928
S7_359	>90% completeness AND <5% contamination	corals/sponges	d__Bacteria;p__Chloroflexota;c__Dehalococcoidia;o__UBA2985;f__UBA2985;g__VEXC01;s__	38	2294380	0	0	0	0	97.41	100	97.928
H39_477	>90% completeness AND <5% contamination	hotsprings	d__Bacteria;p__Chloroflexota;c__Dehalococcoidia;o__UBA2991;f__UBA2991;g__FeB-14;s__FeB-14 sp011055725	14	3759890	0	2.59	0	2.59	93.1	95	93.48
H82_850	>90% completeness AND <5% contamination	hotsprings	d__Bacteria;p__Chloroflexota;c__Dehalococcoidia;o__UBA2991;f__UBA2991;g__HRBIN29;s__	197	2267950	0	1.72	0	1.72	93.1	95	93.48
H24_342	>90% completeness AND <5% contamination	hotsprings	d__Bacteria;p__Chloroflexota;c__Dehalococcoidia;o__UBA2991;f__UBA2991;g__HRBIN29;s__HRBIN29 sp002898215	20	2341290	0	0	0	0	95.69	100	96.552
F11_11	>90% completeness AND <5% contamination	microbial mats	d__Bacteria;p__Chloroflexota;c__Dehalococcoidia;o__UBA2991;f__UBA2991;g__PNKC01;s__	326	3747720	0	1.72	0	1.72	93.97	90	93.176
H64_671	>90% completeness AND <5% contamination	hotsprings	d__Bacteria;p__Chloroflexota;c__Dehalococcoidia;o__UBA2991;f__UBA2991;g__Tepidiforma;s__	251	2548970	0	2.59	0	2.59	95.69	70	90.552
H69_721	>90% completeness AND <5% contamination	hotsprings	d__Bacteria;p__Chloroflexota;c__Dehalococcoidia;o__UBA2991;f__UBA2991;g__Tepidiforma;s__	156	2520150	0	1.72	0	1.72	97.41	95	96.928
H28_383	>90% completeness AND <5% contamination	hotsprings	d__Bacteria;p__Chloroflexota;c__Dehalococcoidia;o__UBA2991;f__UBA2991;g__Tepidiforma;s__Tepidiforma bonchosmolovskayae	136	2589630	0	1.72	0	1.72	92.24	90	91.792
H56_536	>90% completeness AND <5% contamination	hotsprings	d__Bacteria;p__Chloroflexota;c__Dehalococcoidia;o__UBA2991;f__UBA2991;g__Tepidiforma;s__Tepidiforma bonchosmolovskayae	137	2805160	0	1.72	0	1.72	93.97	95	94.176
S12_77	>90% completeness AND <5% contamination	corals/sponges	d__Bacteria;p__Chloroflexota;c__Dehalococcoidia;o__UBA2991;f__UBA2991;g__UBA2991;s__	45	2747240	0	1.72	0	1.72	93.1	95	93.48
S21_135	>90% completeness AND <5% contamination	corals/sponges	d__Bacteria;p__Chloroflexota;c__Dehalococcoidia;o__UBA2991;f__UBA2991;g__UBA2991;s__	415	2514810	0	6.03	75	1.5075	93.97	80	91.176
S25_169	>90% completeness AND <5% contamination	corals/sponges	d__Bacteria;p__Chloroflexota;c__Dehalococcoidia;o__UBA2991;f__UBA2991;g__UBA2991;s__	24	2670030	0.0617971	1.72	0	1.72	92.24	95	92.792
S34_280	>90% completeness AND <5% contamination	corals/sponges	d__Bacteria;p__Chloroflexota;c__Dehalococcoidia;o__UBA2991;f__UBA2991;g__UBA2991;s__	59	2629630	0	3.45	0	3.45	93.1	95	93.48
S13_87	>90% completeness AND <5% contamination	corals/sponges	d__Bacteria;p__Chloroflexota;c__Dehalococcoidia;o__UBA2991;f__UBA2991;g__UBA2991;s__UBA2991 sp009839725	42	2829580	0	5.33	75	1.3325	96.55	95	96.24
S9_401	>90% completeness AND <5% contamination	corals/sponges	d__Bacteria;p__Chloroflexota;c__Dehalococcoidia;o__UBA2991;f__UBA2991;g__UBA2991;s__UBA2991 sp009839725	149	2512930	0	0	0	0	94.83	95	94.864
S26_177	>90% completeness AND <5% contamination	corals/sponges	d__Bacteria;p__Chloroflexota;c__Dehalococcoidia;o__UBA2991;f__UBA2991;g__UBA2991;s__UBA2991 sp009841435	171	2649550	0	3.45	50	1.725	95.86	95	95.688
F3_95	>90% completeness AND <5% contamination	microbial mats	d__Bacteria;p__Chloroflexota;c__Dehalococcoidia;o__UBA2991;f__UBA2991;g__UCB2;s__UCB2 sp003577245	34	3008940	0	1.72	0	1.72	96.55	95	96.24
H68_708	>90% completeness AND <5% contamination	hotsprings	d__Bacteria;p__Chloroflexota;c__Dehalococcoidia;o__UBA3495;f__;g__;s__	362	2560020	0	0.34	0	0.34	95.69	80	92.552
S8_365	>90% completeness AND <5% contamination	corals/sponges	d__Bacteria;p__Chloroflexota;c__Dehalococcoidia;o__UBA3495;f__GCA-2712585;g__;s__	169	2.07232e+06	0	0.16	100	0	90.52	95	91.416
S32_251	>90% completeness AND <5% contamination	corals/sponges	d__Bacteria;p__Chloroflexota;c__Dehalococcoidia;o__UBA3495;f__JAAXIE01;g__;s__	70	3154680	0	1.72	0	1.72	97.41	100	97.928
S32_258	>90% completeness AND <5% contamination	corals/sponges	d__Bacteria;p__Chloroflexota;c__Dehalococcoidia;o__UBA3495;f__JAAXIE01;g__;s__	140	2597570	0	0	0	0	95.06	90	94.048
S7_355	>90% completeness AND <5% contamination	corals/sponges	d__Bacteria;p__Chloroflexota;c__Dehalococcoidia;o__UBA3495;f__JAAXIE01;g__;s__	36	2685000	0	0	0	0	97.41	100	97.928
S8_374	>90% completeness AND <5% contamination	corals/sponges	d__Bacteria;p__Chloroflexota;c__Dehalococcoidia;o__UBA3495;f__JAAXIE01;g__;s__	353	2315710	0	0.86	0	0.86	93.97	85	92.176
S32_245	>90% completeness AND <5% contamination	corals/sponges	d__Bacteria;p__Chloroflexota;c__Dehalococcoidia;o__UBA3495;f__UBA3495;g__;s__	592	5115070	0	1.88	50	0.94	92.24	100	93.792
S34_277	>90% completeness AND <5% contamination	corals/sponges	d__Bacteria;p__Chloroflexota;c__Dehalococcoidia;o__UBA3495;f__UBA3495;g__;s__	204	4745770	0	0	0	0	97.41	85	94.928
S8_379	>90% completeness AND <5% contamination	corals/sponges	d__Bacteria;p__Chloroflexota;c__Dehalococcoidia;o__UBA3495;f__UBA3495;g__;s__	349	2758710	0	7.76	83.33	1.29359	93.97	80	91.176
S16_99	>90% completeness AND <5% contamination	corals/sponges	d__Bacteria;p__Chloroflexota;c__Dehalococcoidia;o__UBA3495;f__UBA3495;g__Bin22;s__	191	3400940	0	0	0	0	97.41	100	97.928
S32_229	>90% completeness AND <5% contamination	corals/sponges	d__Bacteria;p__Chloroflexota;c__Dehalococcoidia;o__UBA3495;f__UBA3495;g__Bin22;s__	74	3540460	0	0	0	0	99.14	100	99.312
S34_266	>90% completeness AND <5% contamination	corals/sponges	d__Bacteria;p__Chloroflexota;c__Dehalococcoidia;o__UBA3495;f__UBA3495;g__Bin22;s__	50	3018050	0	1.72	100	0	99.14	100	99.312
S36_293	>90% completeness AND <5% contamination	corals/sponges	d__Bacteria;p__Chloroflexota;c__Dehalococcoidia;o__UBA3495;f__UBA3495;g__Bin22;s__Bin22 sp002238505	51	3682070	0	0	0	0	97.41	100	97.928
S9_403	>90% completeness AND <5% contamination	corals/sponges	d__Bacteria;p__Chloroflexota;c__Dehalococcoidia;o__UBA3495;f__UBA3495;g__Bin22;s__Bin22 sp009840135	253	3309770	0	1.72	0	1.72	97.41	100	97.928
S11_64	>90% completeness AND <5% contamination	corals/sponges	d__Bacteria;p__Chloroflexota;c__Dehalococcoidia;o__UBA3495;f__UBA3495;g__Bin87;s__	304	3348700	0	1.72	0	1.72	98.98	85	96.184
S20_122	>90% completeness AND <5% contamination	corals/sponges	d__Bacteria;p__Chloroflexota;c__Dehalococcoidia;o__UBA3495;f__UBA3495;g__Bin87;s__	180	3902690	0	0	0	0	95.53	95	95.424
S24_142	>90% completeness AND <5% contamination	corals/sponges	d__Bacteria;p__Chloroflexota;c__Dehalococcoidia;o__UBA3495;f__UBA3495;g__Bin87;s__	144	3773990	0	0	0	0	97.26	100	97.808
S24_152	>90% completeness AND <5% contamination	corals/sponges	d__Bacteria;p__Chloroflexota;c__Dehalococcoidia;o__UBA3495;f__UBA3495;g__Bin87;s__	88	3738790	0	0	0	0	97.26	100	97.808
S25_166	>90% completeness AND <5% contamination	corals/sponges	d__Bacteria;p__Chloroflexota;c__Dehalococcoidia;o__UBA3495;f__UBA3495;g__Bin87;s__	104	3477040	0	0	0	0	97.26	100	97.808
S32_242	>90% completeness AND <5% contamination	corals/sponges	d__Bacteria;p__Chloroflexota;c__Dehalococcoidia;o__UBA3495;f__UBA3495;g__Bin87;s__	107	4256470	0	1.72	0	1.72	97.26	100	97.808
S34_283	>90% completeness AND <5% contamination	corals/sponges	d__Bacteria;p__Chloroflexota;c__Dehalococcoidia;o__UBA3495;f__UBA3495;g__Bin87;s__	172	4053600	0	0	0	0	97.26	100	97.808
S8_392	>90% completeness AND <5% contamination	corals/sponges	d__Bacteria;p__Chloroflexota;c__Dehalococcoidia;o__UBA3495;f__UBA3495;g__Bin87;s__	103	3886890	0	0	0	0	95.53	95	95.424
S38_298	>90% completeness AND <5% contamination	corals/sponges	d__Bacteria;p__Chloroflexota;c__Dehalococcoidia;o__UBA3495;f__UBA3495;g__Bin87;s__Bin87 sp002238825	113	4398160	0.528858	3.29	54.55	1.49531	97.26	100	97.808
S10_55	>90% completeness AND <5% contamination	corals/sponges	d__Bacteria;p__Chloroflexota;c__Dehalococcoidia;o__UBA3495;f__UBA3495;g__Bin87;s__Bin87 sp009837355	81	3180290	0	0	0	0	97.26	100	97.808
S9_404	>90% completeness AND <5% contamination	corals/sponges	d__Bacteria;p__Chloroflexota;c__Dehalococcoidia;o__UBA3495;f__UBA3495;g__Bin87;s__Bin87 sp009840165	117	3518280	0	0	0	0	97.41	95	96.928
S32_232	>90% completeness AND <5% contamination	corals/sponges	d__Bacteria;p__Chloroflexota;c__Dehalococcoidia;o__UBA3495;f__UBA3495;g__Casp-Chloro-G3;s__	76	3267570	0	0	0	0	97.41	90	95.928
S1_17	>90% completeness AND <5% contamination	corals/sponges	d__Bacteria;p__Chloroflexota;c__Dehalococcoidia;o__UBA3495;f__UBA3495;g__GCA-2707185;s__	641	3832910	0.0417437	3.76	75	0.94	99.14	75	94.312
S1_19	>90% completeness AND <5% contamination	corals/sponges	d__Bacteria;p__Chloroflexota;c__Dehalococcoidia;o__UBA3495;f__UBA3495;g__Io17-Chloro-G2;s__	358	4459530	0	1.72	0	1.72	97.41	100	97.928
S8_378	>90% completeness AND <5% contamination	corals/sponges	d__Bacteria;p__Chloroflexota;c__Dehalococcoidia;o__UBA3495;f__UBA3495;g__Io17-Chloro-G2;s__	61	3428920	0	0	0	0	98.28	100	98.624
S1_43	>90% completeness AND <5% contamination	corals/sponges	d__Bacteria;p__Chloroflexota;c__Dehalococcoidia;o__UBA3495;f__UBA3495;g__VXOI01;s__	253	3191760	0	0	0	0	92.24	90	91.792
S9_417	>90% completeness AND <5% contamination	corals/sponges	d__Bacteria;p__Chloroflexota;c__Dehalococcoidia;o__UBA3495;f__UBA3495;g__VXOI01;s__VXOI01 sp009840175	272	3938130	0	0	0	0	99.14	95	98.312
S16_98	>90% completeness AND <5% contamination	corals/sponges	d__Bacteria;p__Chloroflexota;c__Dehalococcoidia;o__UBA6926;f__UBA6926;g__VXMO01;s__	15	1877510	0.759517	0	0	0	97.41	100	97.928
S32_260	>90% completeness AND <5% contamination	corals/sponges	d__Bacteria;p__Chloroflexota;c__Dehalococcoidia;o__UBA6926;f__UBA6926;g__VXMO01;s__	23	1966060	0	0	0	0	95.69	100	96.552
S8_363	>90% completeness AND <5% contamination	corals/sponges	d__Bacteria;p__Chloroflexota;c__Dehalococcoidia;o__UBA6926;f__UBA6926;g__VXMO01;s__	197	1862710	0	0	0	0	93.1	95	93.48
S10_51	>90% completeness AND <5% contamination	corals/sponges	d__Bacteria;p__Chloroflexota;c__Dehalococcoidia;o__UBA6926;f__UBA6926;g__VXMO01;s__VXMO01 sp009841045	84	1763860	0	0	0	0	93.97	100	95.176
S32_256	>90% completeness AND <5% contamination	corals/sponges	d__Bacteria;p__Chloroflexota;c__Dehalococcoidia;o__UBA6952;f__QGNO01;g__;s__	17	1964560	0	1.72	0	1.72	90.52	100	92.416
S5_319	>90% completeness AND <5% contamination	corals/sponges	d__Bacteria;p__Chloroflexota;c__Dehalococcoidia;o__UBA6952;f__QGNO01;g__;s__	207	1931700	0	2.59	50	1.295	96.55	95	96.24
H81_825	>90% completeness AND <5% contamination	hotsprings	d__Bacteria;p__Chloroflexota;c__DTOL01;o__DTOL01;f__DTOL01;g__;s__	424	3509890	0	0.31	0	0.31	94.83	80	91.864
F3_87	>90% completeness AND <5% contamination	microbial mats	d__Bacteria;p__Chloroflexota;c__Ellin6529;o__CSP1-4;f__CSP1-4;g__;s__	61	3983810	0	0	0	0	91.38	95	92.104
F3_94	>90% completeness AND <5% contamination	microbial mats	d__Bacteria;p__Chloroflexota;c__Ellin6529;o__CSP1-4;f__CSP1-4;g__;s__	409	3710490	0	2.59	100	0	96.55	80	93.24
H2_222	>90% completeness AND <5% contamination	hotsprings	d__Bacteria;p__Chloroflexota;c__Ellin6529;o__CSP1-4;f__CSP1-4;g__;s__	96	2429880	0	0	0	0	96.55	95	96.24
H27_376	>90% completeness AND <5% contamination	hotsprings	d__Bacteria;p__Chloroflexota;c__Ellin6529;o__CSP1-4;f__CSP1-4;g__;s__	304	2529910	0	0	0	0	91.38	90	91.104
H56_537	>90% completeness AND <5% contamination	hotsprings	d__Bacteria;p__Chloroflexota;c__Ellin6529;o__CSP1-4;f__CSP1-4;g__;s__	278	3062070	0	0	0	0	93.1	95	93.48
N3_141	>90% completeness AND <5% contamination	high salt	d__Bacteria;p__Chloroflexota;c__Ellin6529;o__CSP1-4;f__CSP1-4;g__;s__	127	2377530	0	0	0	0	94.83	95	94.864
W100_6	>90% completeness AND <5% contamination	water	d__Bacteria;p__Chloroflexota;c__Ellin6529;o__CSP1-4;f__CSP1-4;g__CAIJPD01;s__CAIJPD01 sp903822495	82	3655560	0	0	0	0	94.83	95	94.864
W100_11	>90% completeness AND <5% contamination	water	d__Bacteria;p__Chloroflexota;c__Ellin6529;o__CSP1-4;f__CSP1-4;g__CAIXZV01;s__CAIXZV01 sp903925955	333	3289190	0	1.02	0	1.02	93.1	95	93.48
R72_196	>90% completeness AND <5% contamination	bioreactor	d__Bacteria;p__Chloroflexota;c__FW602-bin22;o__FW602-bin22;f__CADDYW01;g__CADDYW01;s__	159	3581330	0	0	0	0	99.14	85	96.312
H17_189	>90% completeness AND <5% contamination	hotsprings	d__Bacteria;p__Chloroflexota;c__FW602-bin22;o__FW602-bin22;f__DSKJ01;g__DSKJ01;s__DSKJ01 sp011051445	195	3073700	0	0.86	0	0.86	99.14	70	93.312
H61_622	>90% completeness AND <5% contamination	hotsprings	d__Bacteria;p__Chloroflexota;c__FW602-bin22;o__FW602-bin22;f__DSKJ01;g__DSKJ01;s__DSKJ01 sp011051445	100	3360080	0.15952	0	0	0	99.14	90	97.312
L3_2	>90% completeness AND <5% contamination	lichens/mosses	d__Bacteria;p__Chloroflexota;c__Ktedonobacteria;o__Ktedonobacterales;f__Ktedonobacteraceae;g__;s__	309	5493550	0.257757	0.69	0	0.69	94.2	85	92.36
B38_102	>90% completeness AND <5% contamination	soil	d__Bacteria;p__Chloroflexota;c__Ktedonobacteria;o__Ktedonobacterales;f__Ktedonobacteraceae;g__CF-113;s__	110	6803710	0	9.09	66.67	3.0297	99.14	95	98.312
B93_191	>90% completeness AND <5% contamination	soil	d__Bacteria;p__Chloroflexota;c__Ktedonobacteria;o__Ktedonobacterales;f__Ktedonobacteraceae;g__CF-113;s__	494	6094160	0.320635	1.72	0	1.72	95.53	90	94.424
B93_195	>90% completeness AND <5% contamination	soil	d__Bacteria;p__Chloroflexota;c__Ktedonobacteria;o__Ktedonobacterales;f__Ktedonobacteraceae;g__CF-113;s__	693	6680500	0.325874	0.63	25	0.4725	94.51	90	93.608
B93_193	>90% completeness AND <5% contamination	soil	d__Bacteria;p__Chloroflexota;c__Ktedonobacteria;o__Ktedonobacterales;f__Ktedonobacteraceae;g__DTNP01;s__	433	5372010	0.969097	0	0	0	94.83	90	93.864
H111_94	>90% completeness AND <5% contamination	hotsprings	d__Bacteria;p__Chloroflexota;c__Ktedonobacteria;o__Ktedonobacterales;f__Ktedonobacteraceae;g__DTNP01;s__DTNP01 sp011389075	338	5323470	0.0948629	0	0	0	98.28	95	97.624
B30_77	>90% completeness AND <5% contamination	soil	d__Bacteria;p__Chloroflexota;c__Ktedonobacteria;o__Ktedonobacterales;f__Ktedonobacteraceae;g__JACDAE01;s__	384	6772230	0.47237	0	0	0	96.55	90	95.24
R72_192	>90% completeness AND <5% contamination	bioreactor	d__Bacteria;p__Chloroflexota;c__Ktedonobacteria;o__Ktedonobacterales;f__Ktedonobacteraceae;g__Thermogemmatispora;s__	400	4968280	0.236702	2.04	100	0	98.98	80	95.184
R72_197	>90% completeness AND <5% contamination	bioreactor	d__Bacteria;p__Chloroflexota;c__Ktedonobacteria;o__Ktedonobacterales;f__Ktedonobacteraceae;g__Thermogemmatispora;s__	549	5345090	0	2.59	100	0	94.75	85	92.8
B11_21	>90% completeness AND <5% contamination	soil	d__Bacteria;p__Chloroflexota;c__Ktedonobacteria;o__Ktedonobacterales;f__Ktedonobacteraceae;g__UBA11361;s__UBA11361 sp005880425	845	7048680	0.963585	1.88	0	1.88	94.67	80	91.736
B30_79	>90% completeness AND <5% contamination	soil	d__Bacteria;p__Chloroflexota;c__Ktedonobacteria;o__Ktedonobacterales;f__Ktedonobacteraceae;g__UBA11361;s__UBA11361 sp005881495	527	5391350	1.27408	1.72	0	1.72	97.41	85	94.928
S16_103	>90% completeness AND <5% contamination	corals/sponges	d__Bacteria;p__Chloroflexota;c__UBA11872;o__UBA11872;f__UBA11872;g__;s__	171	2564290	0	0.86	100	0	93.97	90	93.176
S7_331	>90% completeness AND <5% contamination	corals/sponges	d__Bacteria;p__Chloroflexota;c__UBA11872;o__UBA11872;f__UBA11872;g__;s__	341	2660830	0	0.16	100	0	91.69	90	91.352
S24_156	>90% completeness AND <5% contamination	corals/sponges	d__Bacteria;p__Chloroflexota;c__UBA11872;o__UBA11872;f__UBA11872;g__UBA11872;s__	226	3490820	0	0	0	0	93.1	100	94.48
S24_162	>90% completeness AND <5% contamination	corals/sponges	d__Bacteria;p__Chloroflexota;c__UBA11872;o__UBA11872;f__UBA11872;g__UBA11872;s__	267	3086960	0.0498873	0	0	0	98.98	85	96.184
S29_215	>90% completeness AND <5% contamination	corals/sponges	d__Bacteria;p__Chloroflexota;c__UBA11872;o__UBA11872;f__UBA11872;g__UBA11872;s__	235	3192210	0	0	0	0	91.38	95	92.104
S34_278	>90% completeness AND <5% contamination	corals/sponges	d__Bacteria;p__Chloroflexota;c__UBA11872;o__UBA11872;f__UBA11872;g__UBA11872;s__	217	3301350	0	0	0	0	94.67	100	95.736
S13_81	>90% completeness AND <5% contamination	corals/sponges	d__Bacteria;p__Chloroflexota;c__UBA11872;o__UBA11872;f__VXNJ01;g__;s__	14	3207930	0	0	0	0	100	100	100
S10_53	>90% completeness AND <5% contamination	corals/sponges	d__Bacteria;p__Chloroflexota;c__UBA11872;o__UBA11872;f__VXNJ01;g__VXNJ01;s__VXNJ01 sp009840625	42	2240820	0.563187	0	0	0	99.14	100	99.312
S27_191	>90% completeness AND <5% contamination	corals/sponges	d__Bacteria;p__Chloroflexota;c__UBA11872;o__UBA11872;f__VXNJ01;g__VXNJ01;s__VXNJ01 sp009840625	97	2207130	0.386475	0	0	0	99.14	95	98.312
S9_411	>90% completeness AND <5% contamination	corals/sponges	d__Bacteria;p__Chloroflexota;c__UBA11872;o__UBA11872;f__VXNJ01;g__VXNJ01;s__VXNJ01 sp009840625	34	2159580	0	0	0	0	99.14	100	99.312
S29_209	>90% completeness AND <5% contamination	corals/sponges	d__Bacteria;p__Chloroflexota;c__UBA11872;o__VXOZ01;f__VXOZ01;g__VXOZ01;s__	461	3202580	0	0	0	0	93.81	80	91.048
H81_824	>90% completeness AND <5% contamination	hotsprings	d__Bacteria;p__Chloroflexota;c__UBA2235;o__SpSt-225;f__SpSt-225;g__SpSt-225;s__SpSt-225 sp011053965	56	4942230	0	0	0	0	100	100	100
B73_147	>90% completeness AND <5% contamination	soil	d__Bacteria;p__Chloroflexota;c__UBA2235;o__UBA12225;f__;g__;s__	297	5597810	0	0	0	0	92.55	100	94.04
S34_270	>90% completeness AND <5% contamination	corals/sponges	d__Bacteria;p__Chloroflexota;c__UBA2235;o__UBA12225;f__;g__;s__	42	3888920	0	0.31	0	0.31	88.79	95	90.032
W39_86	>90% completeness AND <5% contamination	water	d__Bacteria;p__Chloroflexota;c__UBA2235;o__UBA12225;f__UBA12225;g__UBA12225;s__UBA12225 sp002347925	749	3339600	0	3.45	100	0	93.86	80	91.088
B61_133	>90% completeness AND <5% contamination	soil	d__Bacteria;p__Dormibacterota;c__Dormibacteria;o__Dormibacterales;f__Dormibacteraceae;g__40CM-4-65-16;s__	264	2990550	0	2.35	100	0	92.95	80	90.36
B61_138	>90% completeness AND <5% contamination	soil	d__Bacteria;p__Dormibacterota;c__Dormibacteria;o__Dormibacterales;f__Dormibacteraceae;g__CF-118;s__	189	2842310	0	2.73	83.33	0.455091	94.83	95	94.864
M42_103	50-90% completeness AND/OR 5-10% contamination	marine	d__Bacteria;p__Chloroflexota;c__Anaerolineae;o__;f__;g__;s__	495	1442810	0	2.04	0	2.04	59.95	50	57.96
N5_263	50-90% completeness AND/OR 5-10% contamination	high salt	d__Bacteria;p__Chloroflexota;c__Anaerolineae;o__;f__;g__;s__	1236	5383070	0	7.05	33.33	4.70024	94.83	60	87.864
H16_166	50-90% completeness AND/OR 5-10% contamination	hotsprings	d__Bacteria;p__Chloroflexota;c__Anaerolineae;o__4572-78;f__4572-78;g__DUEH01;s__	948	3204550	0	0	0	0	79.31	50	73.448
H14_149	50-90% completeness AND/OR 5-10% contamination	hotsprings	d__Bacteria;p__Chloroflexota;c__Anaerolineae;o__4572-78;f__J111;g__;s__	1839	4789670	0	8.62	0	8.62	75.89	55	71.712
F4_99	50-90% completeness AND/OR 5-10% contamination	microbial mats	d__Bacteria;p__Chloroflexota;c__Anaerolineae;o__4572-78;f__J111;g__DSQQ01;s__	1287	4793370	0	2.59	100	0	72.96	45	67.368
F5_106	50-90% completeness AND/OR 5-10% contamination	microbial mats	d__Bacteria;p__Chloroflexota;c__Anaerolineae;o__4572-78;f__J111;g__DSQQ01;s__	1114	5592430	0	0	0	0	81.66	100	85.328
F9_126	50-90% completeness AND/OR 5-10% contamination	microbial mats	d__Bacteria;p__Chloroflexota;c__Anaerolineae;o__4572-78;f__J111;g__DSQQ01;s__	1133	5763310	0	0	0	0	79.31	70	77.448
H18_194	50-90% completeness AND/OR 5-10% contamination	hotsprings	d__Bacteria;p__Chloroflexota;c__Anaerolineae;o__4572-78;f__J111;g__DSQQ01;s__	1437	3602850	0	0	0	0	57.04	35	52.632
H21_269	50-90% completeness AND/OR 5-10% contamination	hotsprings	d__Bacteria;p__Chloroflexota;c__Anaerolineae;o__4572-78;f__J111;g__DSQQ01;s__	1467	7572390	0	1.72	0	1.72	86.91	70	83.528
H21_284	50-90% completeness AND/OR 5-10% contamination	hotsprings	d__Bacteria;p__Chloroflexota;c__Anaerolineae;o__4572-78;f__J111;g__DSQQ01;s__	2951	6662140	0	13.95	84.62	2.14551	55.86	40	52.688
W92_279	50-90% completeness AND/OR 5-10% contamination	water	d__Bacteria;p__Chloroflexota;c__Anaerolineae;o__4572-78;f__J111;g__DSQQ01;s__	1544	4944360	0	2.74	100	0	73.2	65	71.56
H81_804	50-90% completeness AND/OR 5-10% contamination	hotsprings	d__Bacteria;p__Chloroflexota;c__Anaerolineae;o__4572-78;f__J111;g__J095;s__	1870	9155720	0	3.61	0	3.61	89.05	60	83.24
R826_223	50-90% completeness AND/OR 5-10% contamination	bioreactor	d__Bacteria;p__Chloroflexota;c__Anaerolineae;o__4572-78;f__J111;g__J095;s__	1514	6957000	0	0	0	0	91.38	70	87.104
H16_171	50-90% completeness AND/OR 5-10% contamination	hotsprings	d__Bacteria;p__Chloroflexota;c__Anaerolineae;o__4572-78;f__J111;g__J095;s__J095 sp003695455	1259	5292670	0	0.16	0	0.16	94.83	60	87.864
H21_270	50-90% completeness AND/OR 5-10% contamination	hotsprings	d__Bacteria;p__Chloroflexota;c__Anaerolineae;o__4572-78;f__NAK82;g__;s__	712	5010320	0	5.17	33.33	3.44684	88.48	60	82.784
M35_75	50-90% completeness AND/OR 5-10% contamination	marine	d__Bacteria;p__Chloroflexota;c__Anaerolineae;o__4572-78;f__NAK82;g__;s__	1288	3192030	0	0	0	0	72.57	55	69.056
M42_88	50-90% completeness AND/OR 5-10% contamination	marine	d__Bacteria;p__Chloroflexota;c__Anaerolineae;o__4572-78;f__NAK82;g__;s__	813	2658820	0	0.31	0	0.31	63.39	60	62.712
N14_48	50-90% completeness AND/OR 5-10% contamination	high salt	d__Bacteria;p__Chloroflexota;c__Anaerolineae;o__4572-78;f__NAK82;g__;s__	837	4070880	0	1.72	0	1.72	85.39	65	81.312
W92_259	50-90% completeness AND/OR 5-10% contamination	water	d__Bacteria;p__Chloroflexota;c__Anaerolineae;o__4572-78;f__NAK82;g__DSVE01;s__	1271	4576180	0	3.45	50	1.725	85.66	65	81.528
H61_606	50-90% completeness AND/OR 5-10% contamination	hotsprings	d__Bacteria;p__Chloroflexota;c__Anaerolineae;o__4572-78;f__NAK82;g__DSVE01;s__DSVE01 sp011368475	697	3948290	0	5.67	60	2.268	85.74	80	84.592
H105_21	50-90% completeness AND/OR 5-10% contamination	hotsprings	d__Bacteria;p__Chloroflexota;c__Anaerolineae;o__4572-78;f__NAK82;g__NAK82;s__	894	3029890	0	2.04	66.67	0.679932	74.87	55	70.896
H6_581	50-90% completeness AND/OR 5-10% contamination	hotsprings	d__Bacteria;p__Chloroflexota;c__Anaerolineae;o__4572-78;f__NAK82;g__NAK82;s__	594	1941590	0	1.02	50	0.51	60.83	35	55.664
H94_899	50-90% completeness AND/OR 5-10% contamination	hotsprings	d__Bacteria;p__Chloroflexota;c__Anaerolineae;o__4572-78;f__NAK82;g__NAK82;s__	466	2943080	0	0	0	0	89.66	45	80.728
B22_43	50-90% completeness AND/OR 5-10% contamination	soil	d__Bacteria;p__Chloroflexota;c__Anaerolineae;o__Anaerolineales;f__Anaerolineaceae;g__;s__	857	2630910	0.405943	3.24	40	1.944	74.89	45	68.912
B51_117	50-90% completeness AND/OR 5-10% contamination	soil	d__Bacteria;p__Chloroflexota;c__Anaerolineae;o__Anaerolineales;f__Anaerolineaceae;g__;s__	567	2658520	0.761326	4.31	33.33	2.87348	90.91	75	87.728
B52_120	50-90% completeness AND/OR 5-10% contamination	soil	d__Bacteria;p__Chloroflexota;c__Anaerolineae;o__Anaerolineales;f__Anaerolineaceae;g__;s__	665	2286870	0.676033	1.88	50	0.94	76.87	65	74.496
F17_38	50-90% completeness AND/OR 5-10% contamination	microbial mats	d__Bacteria;p__Chloroflexota;c__Anaerolineae;o__Anaerolineales;f__Anaerolineaceae;g__;s__	736	3519760	0.554583	2.07	0	2.07	75.16	75	75.128
H61_604	50-90% completeness AND/OR 5-10% contamination	hotsprings	d__Bacteria;p__Chloroflexota;c__Anaerolineae;o__Anaerolineales;f__Anaerolineaceae;g__;s__	1020	3515410	1.30938	2.74	33.33	1.82676	80.41	60	76.328
H67_685	50-90% completeness AND/OR 5-10% contamination	hotsprings	d__Bacteria;p__Chloroflexota;c__Anaerolineae;o__Anaerolineales;f__Anaerolineaceae;g__;s__	481	2114630	1.59839	0	0	0	81.63	80	81.304
M52_179	50-90% completeness AND/OR 5-10% contamination	marine	d__Bacteria;p__Chloroflexota;c__Anaerolineae;o__Anaerolineales;f__Anaerolineaceae;g__;s__	457	1418690	0.243182	2.59	100	0	67.16	35	60.728
M54_195	50-90% completeness AND/OR 5-10% contamination	marine	d__Bacteria;p__Chloroflexota;c__Anaerolineae;o__Anaerolineales;f__Anaerolineaceae;g__;s__	514	1441910	0.900888	9.42	41.67	5.49469	64.05	35	58.24
M8_303	50-90% completeness AND/OR 5-10% contamination	marine	d__Bacteria;p__Chloroflexota;c__Anaerolineae;o__Anaerolineales;f__Anaerolineaceae;g__;s__	541	1873700	1.56855	5.49	80	1.098	78.84	40	71.072
N14_60	50-90% completeness AND/OR 5-10% contamination	high salt	d__Bacteria;p__Chloroflexota;c__Anaerolineae;o__Anaerolineales;f__Anaerolineaceae;g__;s__	505	1479690	0	0	0	0	56.3	40	53.04
R103_1	50-90% completeness AND/OR 5-10% contamination	bioreactor	d__Bacteria;p__Chloroflexota;c__Anaerolineae;o__Anaerolineales;f__Anaerolineaceae;g__;s__	729	4013410	1.10206	4.47	75	1.1175	93.34	70	88.672
R103_10	50-90% completeness AND/OR 5-10% contamination	bioreactor	d__Bacteria;p__Chloroflexota;c__Anaerolineae;o__Anaerolineales;f__Anaerolineaceae;g__;s__	874	2678510	0.626094	6.19	80	1.238	59.33	55	58.464
R125_50	50-90% completeness AND/OR 5-10% contamination	bioreactor	d__Bacteria;p__Chloroflexota;c__Anaerolineae;o__Anaerolineales;f__Anaerolineaceae;g__;s__	527	3378140	1.7631	8.62	16.67	7.18305	60.44	45	57.352
R125_51	50-90% completeness AND/OR 5-10% contamination	bioreactor	d__Bacteria;p__Chloroflexota;c__Anaerolineae;o__Anaerolineales;f__Anaerolineaceae;g__;s__	495	2021690	0.576251	3.95	50	1.975	81.03	45	73.824
R44_135	50-90% completeness AND/OR 5-10% contamination	bioreactor	d__Bacteria;p__Chloroflexota;c__Anaerolineae;o__Anaerolineales;f__Anaerolineaceae;g__;s__	254	1907820	3.47569	0.86	100	0	81.03	50	74.824
R46_152	50-90% completeness AND/OR 5-10% contamination	bioreactor	d__Bacteria;p__Chloroflexota;c__Anaerolineae;o__Anaerolineales;f__Anaerolineaceae;g__;s__	651	2867400	0.587292	8.24	7.69	7.60634	70.06	40	64.048
R69_163	50-90% completeness AND/OR 5-10% contamination	bioreactor	d__Bacteria;p__Chloroflexota;c__Anaerolineae;o__Anaerolineales;f__Anaerolineaceae;g__;s__	821	2224540	0.610463	4.18	75	1.045	56.16	35	51.928
R69_172	50-90% completeness AND/OR 5-10% contamination	bioreactor	d__Bacteria;p__Chloroflexota;c__Anaerolineae;o__Anaerolineales;f__Anaerolineaceae;g__;s__	946	3568740	0.468793	1.29	25	0.9675	82.68	60	78.144
R71_179	50-90% completeness AND/OR 5-10% contamination	bioreactor	d__Bacteria;p__Chloroflexota;c__Anaerolineae;o__Anaerolineales;f__Anaerolineaceae;g__;s__	785	2.08053e+06	0.982442	7.05	0	7.05	62.35	50	59.88
R94_299	50-90% completeness AND/OR 5-10% contamination	bioreactor	d__Bacteria;p__Chloroflexota;c__Anaerolineae;o__Anaerolineales;f__Anaerolineaceae;g__;s__	610	2562550	1.33578	0	0	0	91.22	35	79.976
R94_305	50-90% completeness AND/OR 5-10% contamination	bioreactor	d__Bacteria;p__Chloroflexota;c__Anaerolineae;o__Anaerolineales;f__Anaerolineaceae;g__;s__	701	2261870	0.196298	0	0	0	69.75	30	61.8
M52_183	50-90% completeness AND/OR 5-10% contamination	marine	d__Bacteria;p__Chloroflexota;c__Anaerolineae;o__Anaerolineales;f__Anaerolineaceae;g__49-20;s__	482	1643450	2.61097	1.88	100	0	81.9	50	75.52
M52_189	50-90% completeness AND/OR 5-10% contamination	marine	d__Bacteria;p__Chloroflexota;c__Anaerolineae;o__Anaerolineales;f__Anaerolineaceae;g__49-20;s__	657	1647300	1.06538	14.97	76.92	3.45508	72.74	45	67.192
R826_224	50-90% completeness AND/OR 5-10% contamination	bioreactor	d__Bacteria;p__Chloroflexota;c__Anaerolineae;o__Anaerolineales;f__Anaerolineaceae;g__49-20;s__	433	1672000	1.03708	8.93	100	0	86.05	70	82.84
R830_247	50-90% completeness AND/OR 5-10% contamination	bioreactor	d__Bacteria;p__Chloroflexota;c__Anaerolineae;o__Anaerolineales;f__Anaerolineaceae;g__49-20;s__	457	1342540	0.823067	1.88	100	0	61.82	55	60.456
R89_283	50-90% completeness AND/OR 5-10% contamination	bioreactor	d__Bacteria;p__Chloroflexota;c__Anaerolineae;o__Anaerolineales;f__Anaerolineaceae;g__49-20;s__	699	2041660	1.392	13.75	75	3.4375	85.89	65	81.712
R29_109	50-90% completeness AND/OR 5-10% contamination	bioreactor	d__Bacteria;p__Chloroflexota;c__Anaerolineae;o__Anaerolineales;f__Anaerolineaceae;g__49-20;s__49-20 sp002436085	368	1891360	2.53151	0	0	0	88.79	45	80.032
R94_301	50-90% completeness AND/OR 5-10% contamination	bioreactor	d__Bacteria;p__Chloroflexota;c__Anaerolineae;o__Anaerolineales;f__Anaerolineaceae;g__49-20;s__49-20 sp012797215	503	1508860	2.4555	4.94	87.5	0.6175	64.92	15	54.936
M48_145	50-90% completeness AND/OR 5-10% contamination	marine	d__Bacteria;p__Chloroflexota;c__Anaerolineae;o__Anaerolineales;f__Anaerolineaceae;g__A373;s__	536	1487120	0.255527	0.5	50	0.25	64.94	35	58.952
H59_544	50-90% completeness AND/OR 5-10% contamination	hotsprings	d__Bacteria;p__Chloroflexota;c__Anaerolineae;o__Anaerolineales;f__Anaerolineaceae;g__Anaerolinea;s__	752	2285480	0.140014	0.16	0	0.16	81.97	50	75.576
H61_616	50-90% completeness AND/OR 5-10% contamination	hotsprings	d__Bacteria;p__Chloroflexota;c__Anaerolineae;o__Anaerolineales;f__Anaerolineaceae;g__Anaerolinea;s__	678	2320080	0.679718	0	0	0	68.68	35	61.944
M52_180	50-90% completeness AND/OR 5-10% contamination	marine	d__Bacteria;p__Chloroflexota;c__Anaerolineae;o__Anaerolineales;f__Anaerolineaceae;g__Anaerolinea;s__	430	2802110	1.8197	0.16	100	0	85.58	95	87.464
R15_64	50-90% completeness AND/OR 5-10% contamination	bioreactor	d__Bacteria;p__Chloroflexota;c__Anaerolineae;o__Anaerolineales;f__Anaerolineaceae;g__Anaerolinea;s__	394	2610330	0	0	0	0	75.71	65	73.568
W100_10	50-90% completeness AND/OR 5-10% contamination	water	d__Bacteria;p__Chloroflexota;c__Anaerolineae;o__Anaerolineales;f__Anaerolineaceae;g__Anaerolinea;s__	1247	4926620	0.229772	0.86	100	0	79.15	50	73.32
H16_168	50-90% completeness AND/OR 5-10% contamination	hotsprings	d__Bacteria;p__Chloroflexota;c__Anaerolineae;o__Anaerolineales;f__Anaerolineaceae;g__Anaerolinea;s__Anaerolinea thermophila	755	2433640	0.129847	0.69	50	0.345	75.47	65	73.376
H100_2	50-90% completeness AND/OR 5-10% contamination	hotsprings	d__Bacteria;p__Chloroflexota;c__Anaerolineae;o__Anaerolineales;f__Anaerolineaceae;g__Bellilinea;s__	380	1930950	4.17722	0	0	0	57.63	60	58.104
H24_329	50-90% completeness AND/OR 5-10% contamination	hotsprings	d__Bacteria;p__Chloroflexota;c__Anaerolineae;o__Anaerolineales;f__Anaerolineaceae;g__Bellilinea;s__	656	1631140	0.117096	0	0	0	54.87	45	52.896
H61_602	50-90% completeness AND/OR 5-10% contamination	hotsprings	d__Bacteria;p__Chloroflexota;c__Anaerolineae;o__Anaerolineales;f__Anaerolineaceae;g__Bellilinea;s__	560	3514240	0.499397	3.45	100	0	93.1	75	89.48
R103_17	50-90% completeness AND/OR 5-10% contamination	bioreactor	d__Bacteria;p__Chloroflexota;c__Anaerolineae;o__Anaerolineales;f__Anaerolineaceae;g__Bellilinea;s__	420	3854450	1.3906	0	0	0	91.38	75	88.104
W52_103	50-90% completeness AND/OR 5-10% contamination	water	d__Bacteria;p__Chloroflexota;c__Anaerolineae;o__Anaerolineales;f__Anaerolineaceae;g__Bellilinea;s__	450	2685920	0.64894	3.45	100	0	93.1	65	87.48
W58_117	50-90% completeness AND/OR 5-10% contamination	water	d__Bacteria;p__Chloroflexota;c__Anaerolineae;o__Anaerolineales;f__Anaerolineaceae;g__Bellilinea;s__	812	3301440	0.486757	0	0	0	90.8	50	82.64
N9_403	50-90% completeness AND/OR 5-10% contamination	high salt	d__Bacteria;p__Chloroflexota;c__Anaerolineae;o__Anaerolineales;f__Anaerolineaceae;g__Brevefilum;s__	199	2846610	5.15947	0.16	0	0.16	91.38	75	88.104
N9_406	50-90% completeness AND/OR 5-10% contamination	high salt	d__Bacteria;p__Chloroflexota;c__Anaerolineae;o__Anaerolineales;f__Anaerolineaceae;g__Brevefilum;s__	344	1877350	1.81852	1.88	50	0.94	80.72	75	79.576
M11_2	50-90% completeness AND/OR 5-10% contamination	marine	d__Bacteria;p__Chloroflexota;c__Anaerolineae;o__Anaerolineales;f__Anaerolineaceae;g__Ch132;s__	139	2967730	0.0626742	6.9	0	6.9	93.97	95	94.176
R24_76	50-90% completeness AND/OR 5-10% contamination	bioreactor	d__Bacteria;p__Chloroflexota;c__Anaerolineae;o__Anaerolineales;f__Anaerolineaceae;g__DSYU01;s__	1163	5583700	0.627004	19.44	64.71	6.86038	84.56	80	83.648
O12_2	50-90% completeness AND/OR 5-10% contamination	oral	d__Bacteria;p__Chloroflexota;c__Anaerolineae;o__Anaerolineales;f__Anaerolineaceae;g__Flexilinea;s__	398	2430710	2.43633	3.45	0	3.45	86.29	60	81.032
O1B_9	50-90% completeness AND/OR 5-10% contamination	oral	d__Bacteria;p__Chloroflexota;c__Anaerolineae;o__Anaerolineales;f__Anaerolineaceae;g__Flexilinea;s__	553	1688880	1.64784	0.86	100	0	70.3	25	61.24
O2_12	50-90% completeness AND/OR 5-10% contamination	oral	d__Bacteria;p__Chloroflexota;c__Anaerolineae;o__Anaerolineales;f__Anaerolineaceae;g__Flexilinea;s__	538	1470180	1.91609	0.34	0	0.34	72.65	20	62.12
O2A_15	50-90% completeness AND/OR 5-10% contamination	oral	d__Bacteria;p__Chloroflexota;c__Anaerolineae;o__Anaerolineales;f__Anaerolineaceae;g__Flexilinea;s__	455	1623860	1.63007	1.72	100	0	64.58	30	57.664
O2B_16	50-90% completeness AND/OR 5-10% contamination	oral	d__Bacteria;p__Chloroflexota;c__Anaerolineae;o__Anaerolineales;f__Anaerolineaceae;g__Flexilinea;s__	507	1647220	1.94692	0	0	0	83.15	45	75.52
O2E_23	50-90% completeness AND/OR 5-10% contamination	oral	d__Bacteria;p__Chloroflexota;c__Anaerolineae;o__Anaerolineales;f__Anaerolineaceae;g__Flexilinea;s__	605	2135640	1.03622	5.47	44.44	3.03913	72.85	50	68.28
O5_27	50-90% completeness AND/OR 5-10% contamination	oral	d__Bacteria;p__Chloroflexota;c__Anaerolineae;o__Anaerolineales;f__Anaerolineaceae;g__Flexilinea;s__	504	1364830	1.28734	1.18	33.33	0.786706	56.39	25	50.112
O5_28	50-90% completeness AND/OR 5-10% contamination	oral	d__Bacteria;p__Chloroflexota;c__Anaerolineae;o__Anaerolineales;f__Anaerolineaceae;g__Flexilinea;s__	565	1897810	0.915265	4.47	25	3.3525	62.45	30	55.96
R77_212	50-90% completeness AND/OR 5-10% contamination	bioreactor	d__Bacteria;p__Chloroflexota;c__Anaerolineae;o__Anaerolineales;f__Anaerolineaceae;g__Flexilinea;s__Flexilinea flocculi	170	3113410	5.58455	1.72	0	1.72	96.55	90	95.24
O13_4	50-90% completeness AND/OR 5-10% contamination	oral	d__Bacteria;p__Chloroflexota;c__Anaerolineae;o__Anaerolineales;f__Anaerolineaceae;g__Flexilinea;s__Flexilinea sp001717545	576	2665570	1.05043	8.07	88.89	0.896577	91.38	65	86.104
O2_13	50-90% completeness AND/OR 5-10% contamination	oral	d__Bacteria;p__Chloroflexota;c__Anaerolineae;o__Anaerolineales;f__Anaerolineaceae;g__Flexilinea;s__Flexilinea sp001717545	476	1579090	2.1829	1.72	0	1.72	64.5	40	59.6
O2A_14	50-90% completeness AND/OR 5-10% contamination	oral	d__Bacteria;p__Chloroflexota;c__Anaerolineae;o__Anaerolineales;f__Anaerolineaceae;g__Flexilinea;s__Flexilinea sp001717545	608	1904550	1.38143	0.78	100	0	78.75	30	69
O2C_18	50-90% completeness AND/OR 5-10% contamination	oral	d__Bacteria;p__Chloroflexota;c__Anaerolineae;o__Anaerolineales;f__Anaerolineaceae;g__Flexilinea;s__Flexilinea sp001717545	642	2285350	0.769685	3.45	100	0	75.72	60	72.576
O2D_21	50-90% completeness AND/OR 5-10% contamination	oral	d__Bacteria;p__Chloroflexota;c__Anaerolineae;o__Anaerolineales;f__Anaerolineaceae;g__Flexilinea;s__Flexilinea sp001717545	566	2125110	1.93402	2.59	50	1.295	82.13	80	81.704
O2E_24	50-90% completeness AND/OR 5-10% contamination	oral	d__Bacteria;p__Chloroflexota;c__Anaerolineae;o__Anaerolineales;f__Anaerolineaceae;g__Flexilinea;s__Flexilinea sp001717545	683	2373170	1.76599	4.78	83.33	0.796826	74.55	60	71.64
O3_25	50-90% completeness AND/OR 5-10% contamination	oral	d__Bacteria;p__Chloroflexota;c__Anaerolineae;o__Anaerolineales;f__Anaerolineaceae;g__Flexilinea;s__Flexilinea sp001717545	606	1718380	1.08765	3.66	100	0	65.94	50	62.752
O4_26	50-90% completeness AND/OR 5-10% contamination	oral	d__Bacteria;p__Chloroflexota;c__Anaerolineae;o__Anaerolineales;f__Anaerolineaceae;g__Flexilinea;s__Flexilinea sp001717545	622	2.06516e+06	1.54225	4.47	50	2.235	77.34	55	72.872
O5_29	50-90% completeness AND/OR 5-10% contamination	oral	d__Bacteria;p__Chloroflexota;c__Anaerolineae;o__Anaerolineales;f__Anaerolineaceae;g__Flexilinea;s__Flexilinea sp001717545	514	2438180	2.94769	0.86	0	0.86	88.79	60	83.032
O6_30	50-90% completeness AND/OR 5-10% contamination	oral	d__Bacteria;p__Chloroflexota;c__Anaerolineae;o__Anaerolineales;f__Anaerolineaceae;g__Flexilinea;s__Flexilinea sp001717545	531	2323690	2.24686	1.72	0	1.72	83.62	75	81.896
R826_232	50-90% completeness AND/OR 5-10% contamination	bioreactor	d__Bacteria;p__Chloroflexota;c__Anaerolineae;o__Anaerolineales;f__Anaerolineaceae;g__Flexilinea;s__Flexilinea sp002329625	536	1946640	1.08341	6.03	80	1.206	69.66	40	63.728
R89_291	50-90% completeness AND/OR 5-10% contamination	bioreactor	d__Bacteria;p__Chloroflexota;c__Anaerolineae;o__Anaerolineales;f__Anaerolineaceae;g__Flexilinea;s__Flexilinea sp002329625	634	1685180	0.775585	5.33	60	2.132	56.29	40	53.032
R103_4	50-90% completeness AND/OR 5-10% contamination	bioreactor	d__Bacteria;p__Chloroflexota;c__Anaerolineae;o__Anaerolineales;f__Anaerolineaceae;g__Leptolinea;s__	566	3079230	1.02883	0	0	0	58.86	55	58.088
R24_103	50-90% completeness AND/OR 5-10% contamination	bioreactor	d__Bacteria;p__Chloroflexota;c__Anaerolineae;o__Anaerolineales;f__Anaerolineaceae;g__Leptolinea;s__	65	3524840	6.11177	0.86	0	0.86	96.55	100	97.24
R44_139	50-90% completeness AND/OR 5-10% contamination	bioreactor	d__Bacteria;p__Chloroflexota;c__Anaerolineae;o__Anaerolineales;f__Anaerolineaceae;g__Leptolinea;s__Leptolinea sp012515195	363	3199180	2.51627	0	0	0	91.54	70	87.232
R24_98	50-90% completeness AND/OR 5-10% contamination	bioreactor	d__Bacteria;p__Chloroflexota;c__Anaerolineae;o__Anaerolineales;f__Anaerolineaceae;g__Leptolinea;s__Leptolinea tardivitalis	433	2821800	1.17549	6.9	0	6.9	69.59	55	66.672
B22_42	50-90% completeness AND/OR 5-10% contamination	soil	d__Bacteria;p__Chloroflexota;c__Anaerolineae;o__Anaerolineales;f__Anaerolineaceae;g__Longilinea;s__	488	1291370	0.121576	3.61	66.67	1.20321	62.7	45	59.16
B23_46	50-90% completeness AND/OR 5-10% contamination	soil	d__Bacteria;p__Chloroflexota;c__Anaerolineae;o__Anaerolineales;f__Anaerolineaceae;g__Longilinea;s__	989	2366050	0.0773441	19.28	78.57	4.1317	64.59	15	54.672
B51_115	50-90% completeness AND/OR 5-10% contamination	soil	d__Bacteria;p__Chloroflexota;c__Anaerolineae;o__Anaerolineales;f__Anaerolineaceae;g__Longilinea;s__	275	1710010	0.363156	4.08	0	4.08	64.86	70	65.888
B52_127	50-90% completeness AND/OR 5-10% contamination	soil	d__Bacteria;p__Chloroflexota;c__Anaerolineae;o__Anaerolineales;f__Anaerolineaceae;g__Longilinea;s__	347	1775450	0.636458	1.41	77.78	0.313302	69.94	40	63.952
R125_55	50-90% completeness AND/OR 5-10% contamination	bioreactor	d__Bacteria;p__Chloroflexota;c__Anaerolineae;o__Anaerolineales;f__Anaerolineaceae;g__Longilinea;s__	430	2553050	1.83193	0	0	0	90.36	80	88.288
R95_314	50-90% completeness AND/OR 5-10% contamination	bioreactor	d__Bacteria;p__Chloroflexota;c__Anaerolineae;o__Anaerolineales;f__Anaerolineaceae;g__Longilinea;s__	726	3131660	0.190314	7.02	8.33	6.43523	66.3	75	68.04
R95_330	50-90% completeness AND/OR 5-10% contamination	bioreactor	d__Bacteria;p__Chloroflexota;c__Anaerolineae;o__Anaerolineales;f__Anaerolineaceae;g__Longilinea;s__	332	2024900	0.360018	12.38	45.45	6.75329	74.37	40	67.496
R103_11	50-90% completeness AND/OR 5-10% contamination	bioreactor	d__Bacteria;p__Chloroflexota;c__Anaerolineae;o__Anaerolineales;f__Anaerolineaceae;g__Pelolinea;s__	41	2750400	0	0	0	0	89.66	85	88.728
R24_77	50-90% completeness AND/OR 5-10% contamination	bioreactor	d__Bacteria;p__Chloroflexota;c__Anaerolineae;o__Anaerolineales;f__Anaerolineaceae;g__Pelolinea;s__Pelolinea sp013178095	631	1822070	0.670117	7.05	23.53	5.39114	70.55	50	66.44
H19_219	50-90% completeness AND/OR 5-10% contamination	hotsprings	d__Bacteria;p__Chloroflexota;c__Anaerolineae;o__Anaerolineales;f__Anaerolineaceae;g__SpSt-1165;s__SpSt-1165 sp011053085	588	2445530	1.53423	2.04	0	2.04	79.39	90	81.512
B85_164	50-90% completeness AND/OR 5-10% contamination	soil	d__Bacteria;p__Chloroflexota;c__Anaerolineae;o__Anaerolineales;f__Anaerolineaceae;g__T78;s__	139	2152300	5.75663	1.72	100	0	96.55	95	96.24
[truncated: 1,050 more rows]

## Sheet: MAGs from SRA high quality
MAG	quality standard	source	GTDB taxonomy after MDMcleaner	number of contigs	length (bp)	MAGpurify - % cont bp	CheckM - contamination	Checkm - strain heterogeneity	Checkm - adjusted contamination	CheckM - completeness	MDMcleaner - completeness	Weighted completeness
H23_313	>90% completeness AND <5% contamination	hotsprings	d__Bacteria;p__Chloroflexota;c__Anaerolineae;o__;f__;g__;s__	353	3745670	0	0	0	0	94.83	100	95.864
H6_551	>90% completeness AND <5% contamination	hotsprings	d__Bacteria;p__Chloroflexota;c__Anaerolineae;o__;f__;g__;s__	232	3012090	0	0	0	0	93.1	95	93.48
W92_265	>90% completeness AND <5% contamination	water	d__Bacteria;p__Chloroflexota;c__Anaerolineae;o__4572-78;f__J111;g__;s__	583	9165950	0	1.72	0	1.72	96.55	90	95.24
H39_492	>90% completeness AND <5% contamination	hotsprings	d__Bacteria;p__Chloroflexota;c__Anaerolineae;o__4572-78;f__J111;g__DSQQ01;s__DSQQ01 sp011370265	148	8326100	0.0434777	0	0	0	95.77	95	95.616
R115_30	>90% completeness AND <5% contamination	bioreactor	d__Bacteria;p__Chloroflexota;c__Anaerolineae;o__4572-78;f__J111;g__J095;s__	1049	7271070	0	0	0	0	95.69	90	94.552
H21_268	>90% completeness AND <5% contamination	hotsprings	d__Bacteria;p__Chloroflexota;c__Anaerolineae;o__4572-78;f__J111;g__J111;s__	518	7271140	2.90587	0	0	0	96.55	95	96.24
H16_178	>90% completeness AND <5% contamination	hotsprings	d__Bacteria;p__Chloroflexota;c__Anaerolineae;o__4572-78;f__J111;g__J111;s__J111 sp003694775	616	4692770	0	0	0	0	98.28	75	93.624
H21_245	>90% completeness AND <5% contamination	hotsprings	d__Bacteria;p__Chloroflexota;c__Anaerolineae;o__4572-78;f__NAK82;g__;s__	379	6976690	1.1785	0	0	0	94.83	90	93.864
W31_62	>90% completeness AND <5% contamination	water	d__Bacteria;p__Chloroflexota;c__Anaerolineae;o__4572-78;f__NAK82;g__;s__	208	9456430	2.86292	1.72	0	1.72	98.28	95	97.624
W31_78	>90% completeness AND <5% contamination	water	d__Bacteria;p__Chloroflexota;c__Anaerolineae;o__4572-78;f__NAK82;g__;s__	305	9038800	0.810174	0	0	0	96.55	90	95.24
H106_27	>90% completeness AND <5% contamination	hotsprings	d__Bacteria;p__Chloroflexota;c__Anaerolineae;o__4572-78;f__NAK82;g__NAK82;s__	159	3567850	0.133414	0	0	0	96.55	95	96.24
H78_773	>90% completeness AND <5% contamination	hotsprings	d__Bacteria;p__Chloroflexota;c__Anaerolineae;o__4572-78;f__NAK82;g__NAK82;s__	55	3547360	3.34615	0	0	0	96.55	100	97.24
H111_96	>90% completeness AND <5% contamination	hotsprings	d__Bacteria;p__Chloroflexota;c__Anaerolineae;o__4572-78;f__NAK82;g__NAK82;s__NAK82 sp011362805	272	3213020	0	2.59	50	1.295	96.55	90	95.24
F17_48	>90% completeness AND <5% contamination	microbial mats	d__Bacteria;p__Chloroflexota;c__Anaerolineae;o__Anaerolineales;f__Anaerolineaceae;g__;s__	245	3899950	1.87208	0	0	0	96.55	95	96.24
H111_98	>90% completeness AND <5% contamination	hotsprings	d__Bacteria;p__Chloroflexota;c__Anaerolineae;o__Anaerolineales;f__Anaerolineaceae;g__;s__	88	3149460	0	0	0	0	100	100	100
H13_141	>90% completeness AND <5% contamination	hotsprings	d__Bacteria;p__Chloroflexota;c__Anaerolineae;o__Anaerolineales;f__Anaerolineaceae;g__;s__	84	3445740	0.252195	0	0	0	96.55	90	95.24
H61_596	>90% completeness AND <5% contamination	hotsprings	d__Bacteria;p__Chloroflexota;c__Anaerolineae;o__Anaerolineales;f__Anaerolineaceae;g__;s__	50	5068500	3.02673	3.45	0	3.45	96.55	95	96.24
R24_87	>90% completeness AND <5% contamination	bioreactor	d__Bacteria;p__Chloroflexota;c__Anaerolineae;o__Anaerolineales;f__Anaerolineaceae;g__;s__	396	6220050	0.601603	1.72	0	1.72	98.28	100	98.624
R24_88	>90% completeness AND <5% contamination	bioreactor	d__Bacteria;p__Chloroflexota;c__Anaerolineae;o__Anaerolineales;f__Anaerolineaceae;g__;s__	863	4567070	0.503167	3.61	16.67	3.00821	94.83	85	92.864
R77_210	>90% completeness AND <5% contamination	bioreactor	d__Bacteria;p__Chloroflexota;c__Anaerolineae;o__Anaerolineales;f__Anaerolineaceae;g__;s__	241	2671490	3.40522	1.72	100	0	92.95	95	93.36
R830_246	>90% completeness AND <5% contamination	bioreactor	d__Bacteria;p__Chloroflexota;c__Anaerolineae;o__Anaerolineales;f__Anaerolineaceae;g__;s__	557	2846700	1.45396	3.45	100	0	96.39	75	92.112
R830_265	>90% completeness AND <5% contamination	bioreactor	d__Bacteria;p__Chloroflexota;c__Anaerolineae;o__Anaerolineales;f__Anaerolineaceae;g__;s__	390	2871010	0.928593	4.81	60	1.924	92.95	85	91.36
R103_9	>90% completeness AND <5% contamination	bioreactor	d__Bacteria;p__Chloroflexota;c__Anaerolineae;o__Anaerolineales;f__Anaerolineaceae;g__49-20;s__	42	1886800	2.42368	0	0	0	97.41	95	96.928
R69_175	>90% completeness AND <5% contamination	bioreactor	d__Bacteria;p__Chloroflexota;c__Anaerolineae;o__Anaerolineales;f__Anaerolineaceae;g__49-20;s__	98	1933800	0.842383	0	0	0	96.55	85	94.24
R125_54	>90% completeness AND <5% contamination	bioreactor	d__Bacteria;p__Chloroflexota;c__Anaerolineae;o__Anaerolineales;f__Anaerolineaceae;g__49-20;s__49-20 sp002436085	82	2106060	2.83943	0	0	0	98.28	95	97.624
R830_248	>90% completeness AND <5% contamination	bioreactor	d__Bacteria;p__Chloroflexota;c__Anaerolineae;o__Anaerolineales;f__Anaerolineaceae;g__49-20;s__49-20 sp012517865	80	2.09259e+06	2.51889	0.16	100	0	98.28	90	96.624
H78_772	>90% completeness AND <5% contamination	hotsprings	d__Bacteria;p__Chloroflexota;c__Anaerolineae;o__Anaerolineales;f__Anaerolineaceae;g__Anaerolinea;s__	365	3265510	1.6365	0	0	0	100	95	99
R21_67	>90% completeness AND <5% contamination	bioreactor	d__Bacteria;p__Chloroflexota;c__Anaerolineae;o__Anaerolineales;f__Anaerolineaceae;g__Anaerolinea;s__Anaerolinea thermolimosa	77	3903210	0.913095	0	0	0	96.55	100	97.24
H11_48	>90% completeness AND <5% contamination	hotsprings	d__Bacteria;p__Chloroflexota;c__Anaerolineae;o__Anaerolineales;f__Anaerolineaceae;g__Anaerolinea;s__Anaerolinea thermophila	752	4791850	0.246878	9.48	100	0	97.41	80	93.928
H12_123	>90% completeness AND <5% contamination	hotsprings	d__Bacteria;p__Chloroflexota;c__Anaerolineae;o__Anaerolineales;f__Anaerolineaceae;g__Anaerolinea;s__Anaerolinea thermophila	311	3179370	0.781916	0.86	0	0.86	95.42	75	91.336
H34_449	>90% completeness AND <5% contamination	hotsprings	d__Bacteria;p__Chloroflexota;c__Anaerolineae;o__Anaerolineales;f__Anaerolineaceae;g__Bellilinea;s__	161	3591080	1.18237	0	0	0	94.83	95	94.864
H61_625	>90% completeness AND <5% contamination	hotsprings	d__Bacteria;p__Chloroflexota;c__Anaerolineae;o__Anaerolineales;f__Anaerolineaceae;g__Bellilinea;s__	364	3371180	1.04563	0	0	0	92.63	85	91.104
[truncated: 641 more rows]

## Sheet: Chloroflexota MAGs from samples
MAG	quality standard	source	GTDB-Tk taxonomy after MDMcleaner	number of contigs	length (bp)	MAGpurify - % cont bp	CheckM - contamination	Checkm - strain heterogeneity	Checkm - adjusted contamination	CheckM - completeness	MDMcleaner - completeness	Weighted completeness
[truncated: 76 more rows]

[truncated: 2 more sheets: MAGs SRA_at least medium qualit, MAGs from samples high quality]
